# Supplementary material for: The Effect of Bifidobacterium animalis subsp. lactis Bl-04 on Influenza A Virus Infection in Mice
Source: Microorganisms. 2023 Oct 17;11(10):2582. doi: 10.3390/microorganisms11102582 (PMC10609243; doi:10.3390/microorganisms11102582)
Supplement: Supplementary file 1 [file microorganisms-11-02582-s001.zip]

Archive with 5 entries (5 files):
- microorganisms-2632067-supplementary.pdf
- Table S1_tx-mapping-stats.csv
- Table S2_DEG-table.xlsx
- Table S3_pathway-analysis-companion-table.xlsx
- Table S6_Microbiota.xlsx
