# Supplementary material for: The Effect of Bifidobacterium animalis subsp. lactis Bl-04 on Influenza A Virus Infection in Mice
Source: Microorganisms. 2023 Oct 17;11(10):2582. doi: 10.3390/microorganisms11102582 (PMC10609243; doi:10.3390/microorganisms11102582)
Supplement: Supplementary file 1 [file microorganisms-11-02582-s001.zip › Table S1_tx-mapping-stats.csv]

Treatment	Study day	Animal number	Tissue	Reads mapped	Reads processed	Percent mapped
Bl-04	-21	13824	Blood	3015595	3486841	86.48501609336358
Bl-04	-21	13824	Duodenum	4784804	5449404	87.8041708781364
Bl-04	-21	13824	Ileum	6589270	7644146	86.2002112466193
Bl-04	-21	13824	Jejunum	4822971	5419591	88.99142020126611
Bl-04	-21	13824	LungL	4849935	5421498	89.45747097942302
Bl-04	-21	13824	LungR	5852520	6555577	89.27543677696104
Bl-04	-21	13831	Blood	4480742	5408774	82.84210063130757
Bl-04	-21	13831	Duodenum	6982699	7835217	89.11940792450292
Bl-04	-21	13831	Ileum	4280761	4911985	87.14930929145753
Bl-04	-21	13831	Jejunum	2977223	3377349	88.15266056306292
Bl-04	-21	13831	LungL	4448532	4986666	89.20854133804028
Bl-04	-21	13831	LungR	5453291	6081878	89.66459044393854
Bl-04	-21	13864	Blood	5479439	6489545	84.43487178222819
Bl-04	-21	13864	Duodenum	2706905	3029759	89.34390491124871
Bl-04	-21	13864	Ileum	4542626	5201264	87.33696270752648
Bl-04	-21	13864	Jejunum	6009328	6886313	87.26481064685848
Bl-04	-21	13864	LungL	10108790	11272531	89.67631138029249
Bl-04	-21	13864	LungR	3345610	3738029	89.50198085675632
Bl-04	-21	13878	Duodenum	3775403	4360225	86.5873435430511
Bl-04	-21	13878	Ileum	3487621	4000669	87.1759448232283
Bl-04	-21	13878	Jejunum	2892269	3317904	87.17156976211487
Bl-04	-21	13878	LungL	3177002	3576462	88.83086133726572
Bl-04	-21	13878	LungR	3515715	3927400	89.51761979935836
Bl-04	-20	13803	Blood	3238550	4147403	78.08621443346595
Bl-04	-20	13803	Duodenum	3622940	4173092	86.81668173143558
Bl-04	-20	13803	Ileum	3341850	3839078	87.04824439618054
Bl-04	-20	13803	Jejunum	3749573	4267316	87.86724489116813
Bl-04	-20	13803	LungL	3729434	4267837	87.38464004131366
Bl-04	-20	13803	LungR	3969401	4517237	87.87232106705936
Bl-04	-20	13830	Blood	4900126	6413346	76.40514015616809
Bl-04	-20	13830	Duodenum	5122422	5976379	85.71113043533552
Bl-04	-20	13830	Ileum	5179830	6097077	84.9559551240701
Bl-04	-20	13830	Jejunum	3137018	4316414	72.67648561977605
Bl-04	-20	13830	LungL	5515315	7061057	78.10891485509889
Bl-04	-20	13830	LungR	5794249	6740880	85.95686319887018
Bl-04	-20	13856	Blood	4244893	5081813	83.53107444134604
Bl-04	-20	13856	Duodenum	2818763	3884918	72.55656361344049
Bl-04	-20	13856	Ileum	5197793	5870676	88.53823648247663
Bl-04	-20	13856	Jejunum	5248776	6143449	85.43695894602527
Bl-04	-20	13856	LungL	5049678	5951326	84.84962846935288
Bl-04	-20	13856	LungR	5843504	6624020	88.21688340312981
Bl-04	-20	13856	Mesenteric	5575927	6332852	88.04764425254214
Bl-04	-20	13872	Blood	5007864	6011856	83.29979959599831
Bl-04	-20	13872	Duodenum	4197850	5298486	79.22734909557182
Bl-04	-20	13872	Ileum	4518841	5414592	83.4567221316029
Bl-04	-20	13872	Jejunum	4350861	4923317	88.372554519646
Bl-04	-20	13872	LungL	4113859	4689244	87.7296852115181
Bl-04	-20	13872	LungR	5724849	6449222	88.768056053893
Bl-04	-20	13872	Mesenteric	3199261	3728152	85.81358807258933
Bl-04	-18	13851	Blood	3440875	3860553	89.1290703689342
Bl-04	-18	13851	Ileum	3948651	4529294	87.18027577807932
Bl-04	-18	13851	Jejunum	4166002	4998989	83.33689071930344
Bl-04	-18	13851	LungL	3989008	4468853	89.26245727930635
Bl-04	-18	13851	LungR	6811310	7654256	88.98722488508353
Bl-04	-18	13855	Blood	3378684	4024609	83.95061482991267
Bl-04	-18	13855	Duodenum	2354167	3400385	69.23236633498854
Bl-04	-18	13855	Ileum	2966889	3758125	78.94599035423249
Bl-04	-18	13855	Jejunum	3501544	4379201	79.9585129798792
Bl-04	-18	13855	LungL	3176346	3603215	88.15310771075275
Bl-04	-18	13855	LungR	3333731	3697235	90.168220305174
Bl-04	-18	13863	Blood	3281483	4098921	80.05723945399289
Bl-04	-18	13863	Duodenum	3553818	3978889	89.31684196266846
Bl-04	-18	13863	Ileum	3171103	3938666	80.51210739879949
Bl-04	-18	13863	Jejunum	4925148	5532634	89.01994962977851
Bl-04	-18	13863	LungL	3182268	3725502	85.41850198979895
Bl-04	-18	13863	LungR	2436206	2887165	84.3805601688854
Bl-04	-18	13863	Mesenteric	4773819	5479687	87.1184613281744
Bl-04	-18	13881	Blood	3041617	3648287	83.37109991620724
Bl-04	-18	13881	Duodenum	2352062	2659951	88.4250123404529
Bl-04	-18	13881	Ileum	3574908	4025369	88.8094482766673
Bl-04	-18	13881	Jejunum	3729882	4265620	87.44055963728601
Bl-04	-18	13881	LungL	3401777	3825924	88.91386760427024
Bl-04	-18	13881	LungR	3448381	3807381	90.57094627514294
Bl-04	-14	13800	Blood	2831089	3255805	86.9551155551392
Bl-04	-14	13800	Duodenum	4853769	5424673	89.47578960058975
Bl-04	-14	13800	Ileum	7257562	8291517	87.52996586752461
Bl-04	-14	13800	Jejunum	4078072	5116331	79.7069618834278
Bl-04	-14	13800	LungL	2997073	3316864	90.35863393856366
Bl-04	-14	13800	LungR	4898438	5429840	90.21330278608578
Bl-04	-14	13804	Blood	4677996	5363907	87.21247404177589
Bl-04	-14	13804	Duodenum	3862177	4294563	89.93178118472123
Bl-04	-14	13804	Ileum	4538188	5043135	89.98743836918901
Bl-04	-14	13804	Jejunum	5000054	5585919	89.51175267668579
Bl-04	-14	13804	LungL	7210977	8062049	89.44347770647387
Bl-04	-14	13804	LungR	3379061	3767835	89.68176685019381
Bl-04	-14	13871	Blood	3225898	3611286	89.32823376492473
Bl-04	-14	13871	Duodenum	3900622	5203756	74.95781892925034
Bl-04	-14	13871	Ileum	2969542	3869464	76.74298042312837
Bl-04	-14	13871	Jejunum	2998456	3446748	86.9937691992568
Bl-04	-14	13871	LungL	3578156	4010299	89.22417006811712
Bl-04	-14	13871	LungR	4688796	5207227	90.0440099884257
Bl-04	-14	13899	Blood	4414065	6046753	72.99893016962989
Bl-04	-14	13899	Duodenum	5372388	6192289	86.75932276416685
Bl-04	-14	13899	Ileum	4324141	5334592	81.05851394071
Bl-04	-14	13899	Jejunum	4043176	4879067	82.86781058755702
Bl-04	-14	13899	LungL	4780891	5519676	86.61542815194225
Bl-04	-14	13899	LungR	10220628	11766063	86.86531765128234
Bl-04	-7	13794	Blood	2365875	3108325	76.11414507813694
Bl-04	-7	13794	Duodenum	2722899	3123009	87.18831742079513
Bl-04	-7	13794	Ileum	5248194	6027510	87.07068092794536
Bl-04	-7	13794	Jejunum	2837445	3645573	77.83262055100803
Bl-04	-7	13794	LungL	3126885	3524767	88.71182123527598
Bl-04	-7	13794	LungR	2474400	2816274	87.86076922913041
Bl-04	-7	13857	Blood	13089408	14834685	88.23515969499857
Bl-04	-7	13857	Duodenum	3594967	4624137	77.74352273732374
Bl-04	-7	13857	Ileum	8621759	9867055	87.37925348546248
Bl-04	-7	13857	Jejunum	7694242	8832941	87.10849534713296
Bl-04	-7	13857	LungL	11022239	13457045	81.90683021421121
Bl-04	-7	13857	LungR	5201528	6176862	84.2098787377798
Bl-04	-7	13857	Mediastinal	4965001	7315760	67.86719356567193
Bl-04	-7	13860	Blood	2760446	3645588	75.72018560517535
Bl-04	-7	13860	Duodenum	2640176	3507868	75.26440561617484
Bl-04	-7	13860	Ileum	4189421	5079491	82.4771812766279
Bl-04	-7	13860	Jejunum	4817989	5666622	85.02400548333733
Bl-04	-7	13860	LungL	2754040	3245081	84.8681435070496
Bl-04	-7	13860	LungR	3114684	3575694	87.10711822655965
Bl-04	-7	13887	Blood	2206407	2717069	81.20540921117572
Bl-04	-7	13887	Duodenum	7003900	7944078	88.16504571077978
Bl-04	-7	13887	Ileum	16094078	18501444	86.98822643248819
Bl-04	-7	13887	Jejunum	6439224	7591503	84.8214642080758
Bl-04	-7	13887	LungL	3613122	4001830	90.28674381470478
Bl-04	-7	13887	LungR	4197643	4675413	89.78122360527294
Bl-04	-7	13887	Mesenteric	5996660	6755817	88.76291350106138
Bl-04	0	13825	Blood	1514293	3948124	38.354747723222474
Bl-04	0	13825	Duodenum	6873761	9356503	73.46506488588739
Bl-04	0	13825	Ileum	4472404	5314405	84.15625079383298
Bl-04	0	13825	Jejunum	4216765	5074353	83.09955968770797
Bl-04	0	13825	LungL	3628809	4511790	80.42947477608665
Bl-04	0	13825	LungR	3329632	4431800	75.1304661762715
Bl-04	0	13825	Mediastinal	2253376	2723871	82.7269720188658
Bl-04	0	13825	Mesenteric	3458809	4000318	86.46335116358249
Bl-04	0	13845	Ileum	1294499	4114447	31.462283995880856
Bl-04	0	13845	Jejunum	11558215	13208452	87.5062043606624
Bl-04	0	13845	LungL	1140926	2829671	40.32009374941469
Bl-04	0	13845	Mediastinal	10924400	12795739	85.37529563552367
Bl-04	0	13845	Mesenteric	11725989	13364847	87.73754761277851
Bl-04	0	13883	Blood	3816547	5575473	68.45243443919466
Bl-04	0	13883	Duodenum	2260037	3212212	70.35765385348165
Bl-04	0	13883	Ileum	4062001	4875584	83.31311695173336
Bl-04	0	13883	Jejunum	3367590	4433274	75.96169332191063
Bl-04	0	13902	Blood	3849230	4983735	77.23584821424092
Bl-04	0	13902	Duodenum	6114200	7602529	80.42323810931862
Bl-04	0	13902	Ileum	3188572	3706734	86.0210632864403
Bl-04	0	13902	Jejunum	2929828	3326068	88.08683406352486
Bl-04	0	13902	LungL	6512997	7480607	87.06508709787856
Bl-04	0	13902	LungR	6878947	8111566	84.80417961217354
Bl-04	3	13805	Blood	1486748	11493794	12.93522400001253
Bl-04	3	13805	Duodenum	2952424	4421933	66.76772352724475
Bl-04	3	13805	Ileum	4171768	6683245	62.42129384752467
Bl-04	3	13805	Jejunum	2076017	5210506	39.84290585213797
Bl-04	3	13805	LungR	3761409	5063639	74.28272434113096
Bl-04	3	13805	Mediastinal	4066090	5442351	74.71201324574619
Bl-04	3	13805	Mesenteric	2793098	5287818	52.82137168866251
Bl-04	3	13812	Duodenum	4919392	6336124	77.64039971439954
Bl-04	3	13812	Ileum	2641293	4629956	57.0479071507375
Bl-04	3	13812	Jejunum	1793735	4168912	43.02645390451993
Bl-04	3	13812	LungR	2187765	5027275	43.517909802029926
Bl-04	3	13812	Mediastinal	3226830	5453239	59.17272285333542
Bl-04	3	13812	Mesenteric	4508165	6014414	74.95601400236166
Bl-04	3	13840	Blood	3944728	4578832	86.15140280316028
Bl-04	3	13840	Duodenum	4321545	4923462	87.7745171994828
Bl-04	3	13840	Ileum	5024631	5949943	84.44838883330479
Bl-04	3	13840	Jejunum	5210739	6219499	83.78068715824216
Bl-04	3	13840	Mesenteric	5700096	6574875	86.695123481435
Bl-04	3	13846	Blood	5083113	5737768	88.59042401156687
Bl-04	3	13846	Duodenum	3854061	4332844	88.94991372871952
Bl-04	3	13846	Ileum	3777656	4648295	81.2697128732148
Bl-04	3	13846	Jejunum	3975407	4801243	82.79953753642546
Bl-04	3	13846	LungR	9706023	11084104	87.56705097678622
Bl-04	3	13846	Mediastinal	5777512	6674182	86.56509516821687
Bl-04	3	13846	Mesenteric	5446332	6212216	87.67132372731406
Bl-04	3	13865	Blood	6893852	7722467	89.27007392844799
Bl-04	3	13865	Duodenum	5516652	6180060	89.26534693837924
Bl-04	3	13865	Ileum	4059943	4811475	84.38042388248925
Bl-04	3	13865	Jejunum	3649347	4259594	85.67358767056203
Bl-04	3	13865	Mediastinal	4222510	4886603	86.40992525891708
Bl-04	3	13865	Mesenteric	4374949	5072187	86.25370081978444
Bl-04	3	13886	Blood	4908806	5527970	88.79943270314419
Bl-04	3	13886	Duodenum	7255108	8501610	85.33804773448794
Bl-04	3	13886	Ileum	4407337	5142424	85.70543774686801
Bl-04	3	13886	Jejunum	5174101	6052671	85.4845901916691
Bl-04	3	13886	LungR	4441563	4982519	89.14292148208567
Bl-04	3	13886	Mediastinal	3519514	3982498	88.37453276812694
Bl-04	3	13886	Mesenteric	3688893	4138995	89.12533114922826
Bl-04	3	13889	Blood	4278216	5457055	78.39789043724133
Bl-04	3	13889	Duodenum	4725944	5718707	82.64007930464001
Bl-04	3	13889	Ileum	6672000	8245490	80.91696187855422
Bl-04	3	13889	Jejunum	4697541	6205832	75.69558763434138
Bl-04	3	13889	Mediastinal	3819265	4492708	85.01031004018067
Bl-04	3	13903	Blood	4955122	6198501	79.94065016687098
Bl-04	3	13903	Duodenum	4064437	4857022	83.68166749090287
Bl-04	3	13903	Ileum	4043029	5544823	72.91538431434151
Bl-04	3	13903	Jejunum	4608651	5629800	81.86171800063946
Bl-04	3	13903	Mediastinal	5216487	5911547	88.2423331828369
Bl-04	5	13798	Blood	5944353	7207736	82.47184691559181
Bl-04	5	13798	Duodenum	6027444	6682713	90.1945661889116
Bl-04	5	13798	Ileum	5182511	6079666	85.24335053932239
Bl-04	5	13798	Jejunum	2848913	6435557	44.26832051988662
Bl-04	5	13798	Mediastinal	7407749	8290081	89.35677468048866
Bl-04	5	13798	Mesenteric	13306961	14954915	88.98051911361581
Bl-04	5	13799	Blood	4615679	5403301	85.42331807907796
Bl-04	5	13799	Duodenum	4303604	4986643	86.30262884269037
Bl-04	5	13799	Ileum	3591443	4271388	84.08140398390405
Bl-04	5	13799	Jejunum	3667882	4480759	81.8584976339946
Bl-04	5	13799	Mesenteric	2496716	3370953	74.0655832341774
Bl-04	5	13801	Blood	1100394	6386438	17.23016805298979
Bl-04	5	13801	Duodenum	2442241	5732388	42.60425149169944
Bl-04	5	13801	Ileum	8017538	12004146	66.78974081121639
Bl-04	5	13801	Jejunum	3103845	5566856	55.755798245903975
Bl-04	5	13801	Mediastinal	3736208	4924491	75.86993254734348
Bl-04	5	13801	Mesenteric	3818628	5050741	75.60530227148848
Bl-04	5	13817	Blood	6947950	8078146	86.00921548087891
Bl-04	5	13817	Duodenum	5031643	6693656	75.17032545443028
Bl-04	5	13817	Ileum	8651155	10257542	84.33945481285868
Bl-04	5	13817	Mediastinal	5087122	5681249	89.54231719116694
Bl-04	5	13817	Mesenteric	4684787	5266858	88.94842048143315
Bl-04	5	13835	Blood	1122324	5176001	21.683226104477185
Bl-04	5	13835	Duodenum	4044328	5704543	70.89661695950052
Bl-04	5	13835	Ileum	2742371	4336101	63.245090462606846
Bl-04	5	13835	Jejunum	3267795	6238397	52.38196607237404
Bl-04	5	13835	Mediastinal	1912717	3280881	58.29888374494534
Bl-04	5	13835	Mesenteric	7422389	8980945	82.64596877054697
Bl-04	5	13850	Duodenum	3284399	5381869	61.027107869032115
Bl-04	5	13850	Ileum	5225148	6388960	81.78401492574692
Bl-04	5	13850	Jejunum	11918215	15266162	78.06949120545164
Bl-04	5	13850	LungR	2229239	5679588	39.25001250090675
Bl-04	5	13850	Mediastinal	5060733	7050482	71.77853939631362
Bl-04	5	13850	Mesenteric	4942999	6332419	78.05862183156232
Bl-04	5	13862	Blood	4919795	5901603	83.3637064370477
Bl-04	5	13862	Duodenum	4649382	5203075	89.35835059075643
Bl-04	5	13862	Ileum	6337009	7555433	83.87353841930701
Bl-04	5	13862	Jejunum	1158124	1423816	81.33944273698287
Bl-04	5	13862	Mediastinal	1258227	1612687	78.02053343271199
Bl-04	5	13862	Mesenteric	3258521	3724076	87.498778220423
Bl-04	5	13884	Blood	4791962	5443521	88.03055963226743
Bl-04	5	13884	Duodenum	5921981	6902272	85.79756057135968
Bl-04	5	13884	Ileum	4445688	5398575	82.34928661730179
Bl-04	5	13884	Jejunum	4918582	6128793	80.25368127133679
Bl-04	5	13884	LungR	12161484	14424486	84.31138551488074
Bl-04	5	13884	Mesenteric	6905673	7858699	87.87297999325334
Bl-04	7	13795	Blood	4286315	4981141	86.0508666588639
Bl-04	7	13795	Duodenum	5466414	6038525	90.52564988966677
Bl-04	7	13795	Ileum	6089751	7318760	83.20741491728107
Bl-04	7	13795	Jejunum	3564463	4724091	75.4528860684521
Bl-04	7	13795	Mediastinal	5138029	6302407	81.52486819718244
Bl-04	7	13795	Mesenteric	7040891	8342485	84.39800610969034
Bl-04	7	13809	Duodenum	4294162	4887630	87.85775519014328
Bl-04	7	13809	Ileum	4525380	5261977	86.00151616018086
Bl-04	7	13809	Mediastinal	5745119	6468117	88.82212551195347
Bl-04	7	13809	Mesenteric	3881354	4467568	86.87845378066993
Bl-04	7	13832	Blood	4193392	4635320	90.4660735396909
Bl-04	7	13832	Duodenum	8303847	9206934	90.19122978398671
Bl-04	7	13832	Ileum	4075010	4615510	88.28948480232953
Bl-04	7	13832	Jejunum	4212503	4671217	90.17998949738366
Bl-04	7	13832	LungR	4354434	4853068	89.72538608566786
Bl-04	7	13832	Mediastinal	3593394	4081964	88.03100664288073
Bl-04	7	13832	Mesenteric	3344765	3791370	88.22048494343733
Bl-04	7	13874	Blood	6482261	7735533	83.79850489940382
Bl-04	7	13874	Duodenum	6403111	7086763	90.35311326200691
Bl-04	7	13874	Ileum	7376171	8471446	87.0709793817962
Bl-04	7	13874	Jejunum	5667025	6503665	87.13586877552888
Bl-04	7	13874	LungR	5455867	6005193	90.8524838419015
Bl-04	7	13874	Mediastinal	5512840	6205864	88.83275560018717
Bl-04	7	13874	Mesenteric	4790973	5375805	89.12103396607579
Bl-04	7	13876	Blood	4746019	5361611	88.51852549541547
Bl-04	7	13876	Duodenum	4365497	5179074	84.2910721105742
Bl-04	7	13876	Ileum	2964824	3402771	87.12969518078062
Bl-04	7	13876	Jejunum	4858261	5798492	83.78490476489404
Bl-04	7	13876	Mediastinal	4229618	4864904	86.94144838212635
Bl-04	7	13876	Mesenteric	4338380	5239992	82.79363785288221
Bl-04	7	13877	Blood	6407679	7591067	84.4107817781084
Bl-04	7	13877	Duodenum	5910850	6716097	88.01019401595897
Bl-04	7	13877	Ileum	4260277	4872450	87.43603320711347
Bl-04	7	13877	Jejunum	4325100	5007836	86.36664619208776
Bl-04	7	13877	LungR	5653452	6306807	89.64047893014643
Bl-04	7	13877	Mediastinal	2010444	2270372	88.55130348682947
Bl-04	7	13877	Mesenteric	8256314	9524345	86.68642305586368
Bl-04	7	13880	Blood	3253014	3766635	86.36392960825778
Bl-04	7	13880	Duodenum	13476186	15347993	87.80422300166542
Bl-04	7	13880	Ileum	3489015	3872940	90.08698817952254
Bl-04	7	13880	Jejunum	2858419	3457940	82.662481130384
Bl-04	7	13880	Mediastinal	3215178	3687965	87.18027421626832
Bl-04	7	13880	Mesenteric	2456317	2820892	87.07589656037878
Bl-04	7	13893	Blood	5908778	6695751	88.24668061879841
Bl-04	7	13893	Duodenum	2702644	3076814	87.83904389410606
Bl-04	7	13893	Ileum	5412472	6188522	87.45984905604278
Bl-04	7	13893	Jejunum	4311463	5310668	81.18494697842155
Bl-04	7	13893	LungR	8471575	9550673	88.70134073274208
Bl-04	7	13893	Mediastinal	5953106	6697596	88.88422054719335
Bl-04	7	13893	Mesenteric	5298486	6356827	83.35111211930104
control	-21	13807	Duodenum	2240679	2498898	89.66668507478096
control	-21	13807	Ileum	4908743	6072694	80.83303719897627
control	-21	13807	Jejunum	3515225	3997351	87.93886251169837
control	-21	13807	LungL	5681730	6495303	87.47444114616361
control	-21	13807	LungR	7911903	8806151	89.84518889126475
control	-21	13829	Blood	5045745	6125997	82.3661030196391
control	-21	13829	Duodenum	4041713	4765758	84.80734858966821
control	-21	13829	Ileum	3609788	4563531	79.10076648980801
control	-21	13829	Jejunum	4333216	5521177	78.48355522744517
control	-21	13829	LungL	4367954	5090970	85.79806991594921
control	-21	13829	LungR	5318212	5966830	89.1296048320465
control	-21	13870	Blood	3612743	4122343	87.6380980427878
control	-21	13870	Duodenum	4015809	4628170	86.7688308769989
control	-21	13870	Ileum	2543472	2960484	85.91405999829757
control	-21	13870	Jejunum	4249561	4882821	87.03085777668278
control	-21	13870	LungR	4685312	5267421	88.94888029644868
control	-21	13879	Blood	3275698	3927804	83.39769499700087
control	-21	13879	Duodenum	5418033	6066445	89.31149956852819
control	-21	13879	Ileum	3346327	3946849	84.78477387911218
control	-21	13879	Jejunum	1534900	3342107	45.92611786516709
control	-21	13879	LungL	3226413	4177667	77.23001857256693
control	-21	13879	LungR	4377875	4901021	89.32577518031447
control	-20	13819	Blood	2897897	3569105	81.19394077787008
control	-20	13819	Duodenum	3501252	3950989	88.61710321137315
control	-20	13819	Ileum	4320290	4977977	86.78806671866906
control	-20	13819	Jejunum	4243271	5083761	83.46716141848525
control	-20	13819	LungL	2915300	3258717	89.46158871727738
control	-20	13819	LungR	3163350	3555032	88.98232139682568
control	-20	13822	Blood	3872548	4493925	86.172955712434
control	-20	13822	Duodenum	3602022	4076092	88.36949705747564
control	-20	13822	Ileum	3959358	4861728	81.43931540390578
control	-20	13822	Jejunum	5238718	6298927	83.16841900215704
control	-20	13822	LungL	3322776	3816370	87.06640079447223
control	-20	13822	LungR	3449819	3898475	88.49149988136386
control	-20	13873	Blood	2612746	3112704	83.93814509828111
control	-20	13873	Duodenum	3439455	3985367	86.30208961934999
control	-20	13873	Ileum	3098908	3638350	85.17344400621161
control	-20	13873	Jejunum	3344472	3817616	87.60629670454023
control	-20	13873	LungL	3414383	3851328	88.65469261511873
control	-20	13873	LungR	5886996	6840410	86.06203429326604
control	-20	13873	Mesenteric	3281181	3805256	86.22760203255707
control	-20	13890	Blood	5445565	6562492	82.98013925197928
control	-20	13890	Duodenum	4332742	4890965	88.58664905596339
control	-20	13890	Ileum	2466406	2951960	83.55147088713939
control	-20	13890	Jejunum	2480698	2857640	86.80932517741913
control	-20	13890	LungL	5289959	6079948	87.00664874107476
control	-20	13890	LungR	5665859	6334565	89.44353716474612
control	-18	13810	Blood	5023747	5792492	86.72859625874322
control	-18	13810	Duodenum	3488145	4198360	83.08351356243867
control	-18	13810	Ileum	4152539	4869231	85.28120764859996
control	-18	13810	Jejunum	3160894	4145014	76.257740022108493
control	-18	13810	LungL	4515938	5065421	89.15227381889876
control	-18	13810	LungR	4783758	5325126	89.83370534331019
control	-18	13827	Blood	4052694	4975468	81.4535235680342
control	-18	13827	Duodenum	3143989	3953230	79.52962514197252
control	-18	13827	Ileum	4730640	5693625	83.08661002436935
control	-18	13827	Jejunum	5938422	7269203	81.69288985326176
control	-18	13827	LungL	5158826	5798910	88.96199458174037
control	-18	13827	LungR	5484791	6163682	88.98562579964378
control	-18	13827	Mesenteric	3278589	3760106	87.19405782709318
control	-18	13905	Blood	2338696	3079359	75.9474942674758
control	-18	13905	Duodenum	5311109	5971249	88.94469147074591
control	-18	13905	Ileum	8514663	10759781	79.13416639242007
control	-18	13905	Jejunum	10317035	12461095	82.79396794583461
control	-18	13905	LungL	4573454	5512527	82.96474556950015
control	-18	13905	Mediastinal	8154039	10051370	81.12365777003532
control	-18	13908	Blood	2642022	4522560	58.418727446402045
control	-18	13908	Duodenum	6150428	8606018	71.46659465504254
control	-18	13908	Ileum	3041765	3756965	80.96335739087269
control	-18	13908	Jejunum	3616159	4076685	88.70341956761438
control	-18	13908	LungL	5692400	6696673	85.00340392908538
control	-18	13908	LungR	6106576	7030690	86.85599848663502
control	-18	13908	Mediastinal	4379883	5038631	86.92605193752033
control	-18	13908	Mesenteric	5213963	5936908	87.82287008658379
control	-14	13796	Blood	2965877	3433130	86.38988328434985
control	-14	13796	Duodenum	4290794	4840507	88.64348300704864
control	-14	13796	Ileum	3557720	3962971	89.77406092550261
control	-14	13796	Jejunum	2236559	2580906	86.657902302524775
control	-14	13796	LungL	3652368	4092825	89.23831338989572
control	-14	13796	LungR	3967396	4426534	89.62759576680084
control	-14	13808	Blood	5086516	5844917	87.02460616634933
control	-14	13808	Duodenum	14148438	18063881	78.3244641613837
control	-14	13808	Ileum	7318950	8394095	87.19165079737601
control	-14	13808	Jejunum	3619236	4351549	83.17121098716802
control	-14	13808	LungL	7367874	8266942	89.124539642349
control	-14	13808	LungR	6945793	7750060	89.62244163270994
control	-14	13896	Blood	3304203	3794142	87.08696195345351
control	-14	13896	Duodenum	5852287	6607529	88.56997827781005
control	-14	13896	Ileum	3586932	4452596	80.55821817205064
control	-14	13896	Jejunum	11274995	12653765	89.10387540783317
control	-14	13896	LungL	5824705	6475897	89.9443737292301
control	-14	13896	LungR	6177870	6884493	89.73601977661971
control	-14	13896	Mesenteric	4426002	4980347	88.8693498665856
control	-14	13907	Blood	3865520	5052919	76.5007315573434
control	-14	13907	Duodenum	5191783	6902774	75.21299408035088
control	-14	13907	Ileum	3789338	4956717	76.44854447005952
control	-14	13907	Jejunum	4041823	5657908	71.43670416698185
control	-14	13907	LungL	4183035	4817896	86.82285794462977
control	-14	13907	LungR	2136563	3647054	58.58325651333926
control	-7	13826	Blood	3396442	3949954	85.98687478385824
control	-7	13826	Duodenum	3308918	4246370	77.92344991133604
control	-7	13826	Ileum	3114597	3624724	85.92645950422708
control	-7	13826	Jejunum	3499751	4007085	87.33907566223327
control	-7	13826	LungL	5351272	6167454	86.76630583706016
control	-7	13826	LungR	4476735	5009079	89.37241756418695
control	-7	13826	Mesenteric	3521834	4115279	85.5794710395091
control	-7	13854	Blood	8054472	9614613	83.77323143427614
control	-7	13854	Duodenum	2990473	3550731	84.22133357891657
control	-7	13854	Ileum	2632294	3133590	84.00250192271484
control	-7	13854	Jejunum	2138727	2778364	76.9779265783749
control	-7	13854	LungL	4934451	5614111	87.89371994960555
control	-7	13854	LungR	2303927	2589466	88.97305467613786
control	-7	13854	Mesenteric	2324801	2704970	85.94553728876845
control	-7	13891	Blood	2317282	3695548	62.70469224050127
control	-7	13891	Duodenum	3528222	4501435	78.37993884172492
control	-7	13891	Ileum	7454270	9768119	76.31223575388465
control	-7	13891	Jejunum	4374969	5693423	76.84250757409032
control	-7	13891	LungL	4660740	5451809	85.48978880221225
control	-7	13891	LungR	2990744	3745935	79.8397195893682
control	-7	13894	Duodenum	10101364	12605659	80.13356540899606
control	-7	13894	Ileum	3850397	4749637	81.06718471327387
control	-7	13894	LungL	3471581	4008793	86.59915840004709
control	0	13834	Duodenum	9021820	10634944	84.83185242912421
control	0	13834	Ileum	2234723	2544743	87.81723733988068
control	0	13834	Jejunum	6030696	8420404	71.62003153292882
control	0	13834	LungL	6423594	7335396	87.56983263071278
control	0	13834	LungR	10491224	11767383	89.15511630750864
control	0	13834	Mediastinal	1951863	6694921	29.15438434598407
control	0	13842	Blood	2366928	2655084	89.14701003810049
control	0	13842	Duodenum	3848246	4301891	89.4547537350435
control	0	13842	Jejunum	11586604	13372423	86.6455091945566
control	0	13842	LungL	3014011	3406957	88.46636455934137
control	0	13842	LungR	3141941	3527314	89.0746046425127
control	0	13842	Mediastinal	7327365	8528886	85.91233368578266
control	0	13842	Mesenteric	5386524	6185236	87.08679830486662
control	0	13848	Blood	14472803	16388633	88.31000730811411
control	0	13848	Duodenum	2862895	3165524	90.43984503039624
control	0	13848	Ileum	3640792	4676715	77.8493451065545
control	0	13848	Jejunum	3856190	4303103	89.6141691240019
control	0	13848	LungL	2672597	3008554	88.83327339313172
control	0	13848	LungR	2275655	2514481	90.50197635217764
control	0	13848	Mesenteric	3461508	3950883	87.613528418837
control	0	13875	Blood	3128916	3529666	88.64623451624036
control	0	13875	Duodenum	3199801	3586902	89.2079292938586
control	0	13875	Ileum	2875802	3299350	87.16268355888282
control	0	13875	Jejunum	3845399	4279309	89.8602788440844
control	0	13875	LungL	9497130	10670138	89.00662765561232
control	0	13875	LungR	4061415	4562227	89.02264179314182
control	3	13818	Blood	3672875	4208126	87.28053770253076
control	3	13818	Duodenum	3613585	4221094	85.60778319554126
control	3	13818	Ileum	3085534	3665320	84.1818449685157
control	3	13818	Jejunum	3588683	4115235	87.20481333386793
control	3	13818	Mediastinal	4538808	5300033	85.63735357874187
control	3	13818	Mesenteric	8321839	9653340	86.20683618312418
control	3	13843	Blood	1053284	3364982	31.301326426114613
control	3	13843	Duodenum	7431844	9065685	81.97774354613027
control	3	13843	Ileum	2121998	3945557	53.78196285087251
control	3	13843	Jejunum	3903045	5167429	75.53166187672825
control	3	13843	LungR	2140246	4565725	46.87636684206779
control	3	13843	Mediastinal	2131896	3808754	55.97358086135256
control	3	13843	Mesenteric	1846420	4977067	37.09855623804141
control	3	13852	Blood	3670860	4721208	77.75255824356817
control	3	13852	Duodenum	4450630	4961407	89.7049969897652
control	3	13852	Ileum	6960577	7998117	87.0276966440976
control	3	13852	Jejunum	5381451	6148044	87.53110745466363
control	3	13852	LungR	4537550	5103214	88.91553440635647
control	3	13852	Mesenteric	5151783	5878848	87.63252596427054
control	3	13853	Blood	2892468	5505331	52.53940226300653
control	3	13853	Duodenum	4472267	5336964	83.79796078819344
control	3	13853	Ileum	3415326	4008643	85.1990561394467
control	3	13859	Blood	1621431	3256032	49.79775997287496
control	3	13859	Duodenum	2871788	4085980	70.28394656850988
control	3	13859	Ileum	4306301	5438178	79.18646649668327
control	3	13859	Jejunum	2909921	3845534	75.67014099992355
control	3	13859	LungR	3021541	3925370	76.97468009385102
control	3	13859	Mediastinal	2730359	3888668	70.21321953944127
control	3	13859	Mesenteric	3083494	3764703	81.9053720838005
control	3	13861	Blood	2484167	5430432	45.74529245555418
control	3	13861	Duodenum	4799000	5933774	80.87601583747545
control	3	13861	Ileum	4772043	6086569	78.40284074656839
control	3	13861	Jejunum	3859235	5240713	73.63950286917067
control	3	13861	LungR	3555452	5374075	66.15932974511892
control	3	13861	Mediastinal	3974331	4967314	80.00965914375455
control	3	13861	Mesenteric	4261297	6158958	69.18860300719699
control	3	13882	Blood	3252849	3815214	85.25993561566926
control	3	13882	Duodenum	3776639	4852940	77.82167098707176
control	3	13882	Ileum	3284359	3827278	85.81448747647806
control	3	13882	Jejunum	3316832	4002096	82.87737225693736
control	3	13882	Mediastinal	4692859	5483633	85.57937775923371
control	3	13882	Mesenteric	8836816	10410866	84.88070060646253
control	5	13793	Blood	4690112	5377375	87.21935888793324
control	5	13793	Duodenum	2124542	2436950	87.18036890375264
control	5	13793	Ileum	2922381	3513068	83.18600721648428
control	5	13793	Jejunum	2185512	5245400	41.66530674495748
control	5	13793	LungR	2841872	3300688	86.09938291653134
control	5	13793	Mesenteric	4832831	5680063	85.08410910231102
control	5	13811	Blood	3845302	4432428	86.75385138799773
control	5	13811	Duodenum	3146724	4230237	74.38647054526733
control	5	13811	Ileum	3544155	4043658	87.64724909970131
control	5	13811	Jejunum	3002345	3416017	87.89022419970392
control	5	13811	LungR	7533201	8482827	88.80531219132489
control	5	13811	Mediastinal	4476494	5129764	87.2651061530316
control	5	13820	Blood	3977600	4682995	84.93709687924074
control	5	13820	Duodenum	2882091	3466581	83.1392948844986
control	5	13820	Ileum	4114592	4843574	84.94950216513674
control	5	13820	Jejunum	4857344	5734252	84.70754337270144
control	5	13820	Mediastinal	5200273	5994677	86.74817675748001
control	5	13820	Mesenteric	3644294	4125125	88.34384412593558
control	5	13833	Blood	3881516	4423641	87.74482377751721
control	5	13833	Duodenum	3761052	4213087	89.27069391161398
control	5	13833	Ileum	4286304	4856408	88.26078863225659
control	5	13833	Jejunum	4638988	5225664	88.77317791576344
control	5	13833	Mediastinal	5447413	6117449	89.04713386249726
control	5	13833	Mesenteric	7749356	8843619	87.62652484237505
control	5	13841	Blood	4852546	5799232	83.67566601922462
control	5	13841	Duodenum	4654044	5210821	89.31498510503431
control	5	13841	Ileum	9773296	11223756	87.0768751565875
control	5	13841	Jejunum	4122285	4800587	85.87043626123221
control	5	13841	Mediastinal	3016039	3388403	89.01063421322671
control	5	13841	Mesenteric	2886647	3470311	83.18121920484937
control	5	13844	Blood	12656732	14629103	86.51748504334135
control	5	13844	Duodenum	6612403	7328038	90.2342891780856
control	5	13844	Ileum	4072155	4596429	88.59388451339072
control	5	13844	Jejunum	3607385	4294410	84.00187685852073
control	5	13844	LungR	7583861	8557775	88.6195418785841
control	5	13844	Mediastinal	4513027	5166296	87.35517670687084
control	5	13844	Mesenteric	4002220	4561286	87.74323732385997
control	5	13897	Blood	2963175	4948120	59.884865363006554
control	5	13897	Duodenum	3198384	4012452	79.71145823052836
control	5	13897	Ileum	4300454	5129354	83.84007030904867
control	5	13897	Jejunum	4010536	4994541	80.29838978196395
control	5	13897	LungR	7780904	8935818	87.07545296916298
control	5	13897	Mesenteric	1861902	2189254	85.0473266235896
control	5	13906	Blood	2789969	3501532	79.67852357196793
control	5	13906	Duodenum	3208501	4167634	76.98615089520817
control	5	13906	Ileum	3843191	4573397	84.03361877396604
control	5	13906	Jejunum	3548837	4207139	84.352739474498
control	5	13906	Mediastinal	1330686	3186402	41.76139733781237
control	7	13797	Duodenum	2871756	7436707	38.61596268348343
control	7	13797	Ileum	1546477	5734822	26.966434180520334
control	7	13797	Jejunum	3046955	6182716	49.28182048148419
control	7	13797	LungR	1168384	6808771	17.159983791494824
control	7	13797	Mediastinal	3413719	4362535	78.25081059521585
control	7	13797	Mesenteric	4350191	5233146	83.12764444179467
control	7	13814	Blood	4858003	5457452	89.01595469827312
control	7	13814	Duodenum	4975221	5581508	89.13757715656773
control	7	13814	Ileum	5808990	6658384	87.24324100262166
control	7	13814	Jejunum	6566943	7569092	86.75998389238761
control	7	13814	LungR	3648606	4092256	89.15879162984915
control	7	13814	Mediastinal	7570677	8592530	88.10765862906501
control	7	13814	Mesenteric	5067412	5892053	86.00418224343875
control	7	13821	Blood	3968975	4782440	82.99058639522922
control	7	13821	Duodenum	3747327	4201377	89.19282892251755
control	7	13821	Ileum	5360630	6315592	84.87929555930782
control	7	13821	Jejunum	9535606	10992937	86.74302417998028
control	7	13821	Mediastinal	3905657	4551669	85.80714019406948
control	7	13821	Mesenteric	3623086	4254330	85.16231698058213
control	7	13866	Blood	2932423	3336997	87.87610537258499
control	7	13866	Duodenum	3521451	4248706	82.88290599537835
control	7	13866	Ileum	2893768	3410395	84.85140284336565
control	7	13866	Jejunum	3370343	4081318	82.57976957443648
control	7	13866	Mediastinal	3307948	3700550	89.39071219143099
control	7	13866	Mesenteric	4241510	4921363	86.18567661032117
control	7	13885	Blood	1998626	2303367	86.76975922638468
control	7	13885	Duodenum	4551182	5149976	88.37287785418806
control	7	13885	Ileum	3980159	4802441	82.87783233568095
control	7	13885	Jejunum	4539133	5362227	84.65014629182987
control	7	13885	Mediastinal	4269933	4889898	87.32151468190133
control	7	13885	Mesenteric	4532372	5162890	87.78749886207143
control	7	13892	Blood	4081642	4760948	85.73170721461356
control	7	13892	Duodenum	4509275	5037869	89.50758743429017
control	7	13892	Ileum	4656485	5301512	87.8331502409124
control	7	13892	Jejunum	6963294	8104855	85.91509656866162
control	7	13892	Mediastinal	6882800	7851823	87.65862399088721
control	7	13892	Mesenteric	5004566	5707006	87.69161973896645
control	7	13895	Blood	5756994	6462126	89.08823504834167
control	7	13895	Duodenum	4698525	5338423	88.01335150848855
control	7	13895	Ileum	3565587	4464800	79.85994893388282
control	7	13895	Jejunum	2518386	3000207	83.94040811184028
control	7	13895	Mediastinal	3763424	4331486	86.88528601962467
control	7	13895	Mesenteric	4038263	4704216	85.84348592836723
control	7	13900	Blood	5366522	6080045	88.26451120016382
control	7	13900	Duodenum	4522560	4968087	91.03222226180822
control	7	13900	Ileum	7601145	8602713	88.35753325724106
control	7	13900	Jejunum	4134363	4886649	84.60527858661426
control	7	13900	LungR	4233117	4672478	90.59683106052076
control	7	13900	Mediastinal	4700081	5210347	90.20667913288692
control	7	13900	Mesenteric	4447528	5005738	88.8485973496815
