# Supplementary material for: The Effect of Bifidobacterium animalis subsp. lactis Bl-04 on Influenza A Virus Infection in Mice
Source: Microorganisms. 2023 Oct 17;11(10):2582. doi: 10.3390/microorganisms11102582 (PMC10609243; doi:10.3390/microorganisms11102582)
Supplement: Supplementary file 1 [file microorganisms-11-02582-s001.zip › Table S2_DEG-table.xlsx]

## Sheet: within timepoint comparison
contrast	tissue	treatment	study_day	gene_id	baseMean	log2FoldChange	lfcSE	stat	pvalue	padj
Blood_-14_Bl-04/Blood_-14_control	Blood	Bl-04	-14	Amy2a5	116.023	18.1144	2.50228	7.23917	4.51454e-13	6.35016e-09
Blood_-14_Bl-04/Blood_-14_control	Blood	Bl-04	-14	Gm10334	106.215	16.1107	2.54433	6.33203	2.41958e-10	1.70169e-06
Blood_-14_Bl-04/Blood_-14_control	Blood	Bl-04	-14	Try10	9.38221	15.9829	3.16375	5.05189	4.37467e-07	0.00205114
Blood_-18_Bl-04/Blood_-18_control	Blood	Bl-04	-18	Arpp21	19.9176	-3.53154	0.806161	-4.38069	1.18303e-05	0.0416014
Blood_-18_Bl-04/Blood_-18_control	Blood	Bl-04	-18	Cuzd1	6.54126	39.6783	3.27093	12.1306	7.27092e-34	1.02273e-29
Blood_-18_Bl-04/Blood_-18_control	Blood	Bl-04	-18	Hist2h3b	659.32	-2.01898	0.452839	-4.45849	8.2539e-06	0.0386998
Blood_-18_Bl-04/Blood_-18_control	Blood	Bl-04	-18	Try10	9.38221	-14.852	3.17213	-4.68203	2.84047e-06	0.0199771
Blood_-20_Bl-04/Blood_-20_control	Blood	Bl-04	-20	2210010C04Rik	314.501	8.29966	2.14677	3.86612	0.000110579	0.0497529
Blood_-20_Bl-04/Blood_-20_control	Blood	Bl-04	-20	Cela1	555.586	7.64556	1.63748	4.66911	3.02502e-06	0.00706803
Blood_-20_Bl-04/Blood_-20_control	Blood	Bl-04	-20	Cela2a	435.174	7.11525	1.75243	4.06023	4.9025e-05	0.0279116
Blood_-20_Bl-04/Blood_-20_control	Blood	Bl-04	-20	Cpa1	424.418	7.66958	1.92164	3.99116	6.57508e-05	0.0327512
Blood_-20_Bl-04/Blood_-20_control	Blood	Bl-04	-20	Cpb1	806.98	8.04659	1.97222	4.07996	4.50434e-05	0.0272738
Blood_-20_Bl-04/Blood_-20_control	Blood	Bl-04	-20	Ctrb1	213.711	7.78234	1.90794	4.07893	4.52435e-05	0.0272738
Blood_-20_Bl-04/Blood_-20_control	Blood	Bl-04	-20	Ctrc	252.428	7.80291	1.86113	4.19257	2.75807e-05	0.0188431
Blood_-20_Bl-04/Blood_-20_control	Blood	Bl-04	-20	Ctrl	93.49	8.51288	1.8716	4.54846	5.40402e-06	0.0073706
Blood_-20_Bl-04/Blood_-20_control	Blood	Bl-04	-20	Gm10334	106.215	9.77271	2.30354	4.24247	2.21078e-05	0.0188431
Blood_-20_Bl-04/Blood_-20_control	Blood	Bl-04	-20	Gm5771	20.3933	9.04665	1.89443	4.7754	1.7935e-06	0.00706803
Blood_-20_Bl-04/Blood_-20_control	Blood	Bl-04	-20	Gp2	86.1768	8.53779	2.14179	3.98629	6.71131e-05	0.0327512
Blood_-20_Bl-04/Blood_-20_control	Blood	Bl-04	-20	Klk1b21	19.9452	6.68413	1.58621	4.21389	2.51008e-05	0.0188431
Blood_-20_Bl-04/Blood_-20_control	Blood	Bl-04	-20	Klk1b9	46.8022	5.65797	1.33677	4.23256	2.31042e-05	0.0188431
Blood_-20_Bl-04/Blood_-20_control	Blood	Bl-04	-20	Pdia2	77.0557	8.15269	1.7447	4.67284	2.97066e-06	0.00706803
Blood_-20_Bl-04/Blood_-20_control	Blood	Bl-04	-20	Pla2g1b	16.1695	7.72186	1.84004	4.19657	2.70982e-05	0.0188431
Blood_-20_Bl-04/Blood_-20_control	Blood	Bl-04	-20	Prss1	676.889	7.79645	1.69045	4.61206	3.987e-06	0.00706803
Blood_-20_Bl-04/Blood_-20_control	Blood	Bl-04	-20	Prss2	101.657	10.7714	2.37504	4.53524	5.75378e-06	0.0073706
Blood_-20_Bl-04/Blood_-20_control	Blood	Bl-04	-20	Prss3	342.441	8.72232	2.02714	4.30276	1.68684e-05	0.0172867
Blood_-20_Bl-04/Blood_-20_control	Blood	Bl-04	-20	Reg1	132.196	5.62855	1.22245	4.60432	4.13819e-06	0.00706803
Blood_-20_Bl-04/Blood_-20_control	Blood	Bl-04	-20	Rnase1	703.851	7.13117	1.7707	4.02732	5.64153e-05	0.0304286
Blood_-20_Bl-04/Blood_-20_control	Blood	Bl-04	-20	Try4	1027.98	8.0215	1.79931	4.4581	8.26891e-06	0.00941553
Blood_-20_Bl-04/Blood_-20_control	Blood	Bl-04	-20	Try5	518.287	7.76061	2.00857	3.86374	0.000111662	0.0497529
Blood_-20_Bl-04/Blood_-20_control	Blood	Bl-04	-20	Zg16	161.868	5.36555	1.11861	4.79662	1.61368e-06	0.00706803
Blood_-21_Bl-04/Blood_-21_control	Blood	Bl-04	-21	Cuzd1	6.54126	-34.4733	3.87973	-8.8855	6.36362e-19	3.24752e-15
Blood_-21_Bl-04/Blood_-21_control	Blood	Bl-04	-21	Gm10717	140248	-8.46843	1.691	-5.00795	5.50119e-07	0.00155513
Blood_-21_Bl-04/Blood_-21_control	Blood	Bl-04	-21	Gm17535	98632.6	-8.06933	1.6116	-5.00702	5.52797e-07	0.00155513
Blood_-21_Bl-04/Blood_-21_control	Blood	Bl-04	-21	Reg3d	5.12201	27.2608	3.07127	8.87607	6.92632e-19	3.24752e-15
Blood_-21_Bl-04/Blood_-21_control	Blood	Bl-04	-21	Tff1	24.6022	-21.4418	2.24079	-9.56883	1.08118e-21	1.52079e-17
Blood_-7_Bl-04/Blood_-7_control	Blood	Bl-04	-7	Reg3d	5.12201	31.4324	2.84341	11.0545	2.08585e-28	2.93396e-24
Blood_0_Bl-04/Blood_0_control	Blood	Bl-04	0	1110059E24Rik	296.942	-2.32998	0.604227	-3.85613	0.000115194	0.00764526
Blood_0_Bl-04/Blood_0_control	Blood	Bl-04	0	1110059G10Rik	184.699	-1.82334	0.613833	-2.97043	0.00297386	0.0357564
Blood_0_Bl-04/Blood_0_control	Blood	Bl-04	0	1110065P20Rik	18.0881	3.79945	1.10704	3.43207	0.000598987	0.0163602
Blood_0_Bl-04/Blood_0_control	Blood	Bl-04	0	1500011B03Rik	147.721	3.06354	0.782267	3.91623	8.99451e-05	0.00683178
Blood_0_Bl-04/Blood_0_control	Blood	Bl-04	0	1700037H04Rik	162.471	1.8414	0.603355	3.05194	0.00227367	0.0312399
Blood_0_Bl-04/Blood_0_control	Blood	Bl-04	0	1700049E17Rik2	31.7324	4.75388	1.68087	2.82822	0.00468073	0.0451703
Blood_0_Bl-04/Blood_0_control	Blood	Bl-04	0	1810022K09Rik	36.7173	-4.29155	1.28923	-3.32877	0.000872293	0.0194611
Blood_0_Bl-04/Blood_0_control	Blood	Bl-04	0	1810030O07Rik	12.7674	-3.43074	1.13016	-3.03562	0.00240042	0.0322922
Blood_0_Bl-04/Blood_0_control	Blood	Bl-04	0	1810037I17Rik	578.585	3.27586	0.995037	3.2922	0.000994066	0.0207496
Blood_0_Bl-04/Blood_0_control	Blood	Bl-04	0	2010111I01Rik	130.129	1.6688	0.466179	3.57974	0.000343942	0.0127052
Blood_0_Bl-04/Blood_0_control	Blood	Bl-04	0	2010309G21Rik	135.266	-6.49924	1.54627	-4.20319	2.63181e-05	0.00390925
Blood_0_Bl-04/Blood_0_control	Blood	Bl-04	0	2510039O18Rik	9.97683	-3.0422	1.03071	-2.95157	0.00316167	0.0369134
Blood_0_Bl-04/Blood_0_control	Blood	Bl-04	0	2610002M06Rik	57.2244	1.86919	0.5381	3.47369	0.000513352	0.0152539
Blood_0_Bl-04/Blood_0_control	Blood	Bl-04	0	2700062C07Rik	26.8779	-4.65302	1.07929	-4.31117	1.62392e-05	0.00322873
Blood_0_Bl-04/Blood_0_control	Blood	Bl-04	0	4833439L19Rik	253.318	1.51526	0.425362	3.56227	0.000367662	0.0129879
Blood_0_Bl-04/Blood_0_control	Blood	Bl-04	0	4930523C07Rik	10.7834	-5.17	1.70081	-3.03972	0.00236797	0.0319829
Blood_0_Bl-04/Blood_0_control	Blood	Bl-04	0	4930562C15Rik	7.30708	5.50302	1.79991	3.05738	0.00223282	0.0309618
Blood_0_Bl-04/Blood_0_control	Blood	Bl-04	0	4931414P19Rik	88.4533	1.74659	0.551218	3.1686	0.00153177	0.0254327
Blood_0_Bl-04/Blood_0_control	Blood	Bl-04	0	4933434E20Rik	231.892	-2.1229	0.591234	-3.59062	0.00032989	0.0124584
Blood_0_Bl-04/Blood_0_control	Blood	Bl-04	0	5430427O19Rik	29.5038	-4.59795	1.58245	-2.90559	0.00366557	0.0395835
Blood_0_Bl-04/Blood_0_control	Blood	Bl-04	0	5730480H06Rik	18.4068	-2.20023	0.673179	-3.26841	0.00108152	0.0214266
Blood_0_Bl-04/Blood_0_control	Blood	Bl-04	0	6030468B19Rik	18.2374	2.27033	0.744742	3.04848	0.00230002	0.0313787
Blood_0_Bl-04/Blood_0_control	Blood	Bl-04	0	8030462N17Rik	83.2771	1.1237	0.397244	2.82873	0.0046733	0.0451308
Blood_0_Bl-04/Blood_0_control	Blood	Bl-04	0	9030624G23Rik	9.57538	3.45931	1.05267	3.28621	0.00101545	0.0208769
Blood_0_Bl-04/Blood_0_control	Blood	Bl-04	0	9930111J21Rik2	73.6984	-2.71561	0.830317	-3.27057	0.0010733	0.0214266
Blood_0_Bl-04/Blood_0_control	Blood	Bl-04	0	A130071D04Rik	190.572	-2.73285	0.983022	-2.78005	0.00543506	0.0488253
Blood_0_Bl-04/Blood_0_control	Blood	Bl-04	0	Aaed1	54.6827	3.05347	1.05853	2.88464	0.00391863	0.0410619
Blood_0_Bl-04/Blood_0_control	Blood	Bl-04	0	Aagab	604.676	1.24344	0.360125	3.4528	0.000554808	0.0156271
Blood_0_Bl-04/Blood_0_control	Blood	Bl-04	0	Abca2	40.6371	-1.85535	0.564418	-3.28719	0.00101192	0.0208769
Blood_0_Bl-04/Blood_0_control	Blood	Bl-04	0	Abca9	27.9314	-4.23656	1.25662	-3.3714	0.000747872	0.0178328
Blood_0_Bl-04/Blood_0_control	Blood	Bl-04	0	Abcb10	369.202	2.0597	0.527492	3.90472	9.43358e-05	0.00699048
Blood_0_Bl-04/Blood_0_control	Blood	Bl-04	0	Abcb1b	190.997	1.41747	0.511522	2.77109	0.00558697	0.0495642
Blood_0_Bl-04/Blood_0_control	Blood	Bl-04	0	Abcc3	675.723	4.73918	1.50425	3.15053	0.00162977	0.0263839
Blood_0_Bl-04/Blood_0_control	Blood	Bl-04	0	Abcc5	72.3157	-1.57485	0.537523	-2.92983	0.00339152	0.0382749
Blood_0_Bl-04/Blood_0_control	Blood	Bl-04	0	Abhd10	10.7214	-4.45308	1.54578	-2.8808	0.00396663	0.0412913
Blood_0_Bl-04/Blood_0_control	Blood	Bl-04	0	Abhd12	102.575	3.55353	1.00552	3.53403	0.000409271	0.0138556
Blood_0_Bl-04/Blood_0_control	Blood	Bl-04	0	Abhd15	117.04	2.48152	0.812246	3.05513	0.00224966	0.0310678
Blood_0_Bl-04/Blood_0_control	Blood	Bl-04	0	Abhd17a	330.08	1.51364	0.478679	3.16211	0.00156628	0.0258019
Blood_0_Bl-04/Blood_0_control	Blood	Bl-04	0	Abhd18	85.5823	1.57015	0.540904	2.90282	0.00369821	0.0397139
Blood_0_Bl-04/Blood_0_control	Blood	Bl-04	0	Ablim1	205.258	-2.53125	0.849572	-2.97944	0.00288772	0.0353277
Blood_0_Bl-04/Blood_0_control	Blood	Bl-04	0	Abtb1	1578.98	2.85092	0.693679	4.10986	3.95906e-05	0.00491069
Blood_0_Bl-04/Blood_0_control	Blood	Bl-04	0	AC123873.3	14.899	6.07839	1.94502	3.1251	0.00177745	0.0272153
Blood_0_Bl-04/Blood_0_control	Blood	Bl-04	0	AC132444.5	91.983	-2.82252	0.948615	-2.97541	0.00292594	0.0355424
Blood_0_Bl-04/Blood_0_control	Blood	Bl-04	0	AC133095.2	48.8885	5.71029	1.63665	3.48902	0.000484804	0.0149709
Blood_0_Bl-04/Blood_0_control	Blood	Bl-04	0	AC140365.1	15.5357	8.43997	2.04185	4.13349	3.57299e-05	0.00464488
Blood_0_Bl-04/Blood_0_control	Blood	Bl-04	0	Acaca	100.468	-3.83476	0.792584	-4.83831	1.30951e-06	0.000680945
Blood_0_Bl-04/Blood_0_control	Blood	Bl-04	0	Acad12	85.2277	1.9765	0.665786	2.96868	0.00299085	0.0358796
Blood_0_Bl-04/Blood_0_control	Blood	Bl-04	0	Acadsb	68.9178	-4.27924	1.46844	-2.91413	0.00356679	0.0392864
Blood_0_Bl-04/Blood_0_control	Blood	Bl-04	0	Acbd5	19.5732	2.40811	0.756511	3.18318	0.00145665	0.024866
Blood_0_Bl-04/Blood_0_control	Blood	Bl-04	0	Accs	34.1496	-1.63567	0.557557	-2.93363	0.00335025	0.0381274
Blood_0_Bl-04/Blood_0_control	Blood	Bl-04	0	Acly	281.416	-3.38503	0.803055	-4.21519	2.49572e-05	0.00383434
Blood_0_Bl-04/Blood_0_control	Blood	Bl-04	0	Acot6	23.4765	4.84108	1.40464	3.44649	0.000567915	0.0158969
Blood_0_Bl-04/Blood_0_control	Blood	Bl-04	0	Acp5	130.791	-2.8533	0.832103	-3.42902	0.000605759	0.0165118
Blood_0_Bl-04/Blood_0_control	Blood	Bl-04	0	Acss1	34.7205	-5.98669	1.58986	-3.76555	0.000166183	0.00895138
Blood_0_Bl-04/Blood_0_control	Blood	Bl-04	0	Adam15	75.0318	-3.6671	0.971132	-3.77611	0.000159295	0.00878297
Blood_0_Bl-04/Blood_0_control	Blood	Bl-04	0	Adam17	99.4955	3.23607	1.06445	3.04013	0.00236475	0.0319714
Blood_0_Bl-04/Blood_0_control	Blood	Bl-04	0	Adam32	4.71134	4.85355	1.60192	3.02983	0.00244688	0.0324968
Blood_0_Bl-04/Blood_0_control	Blood	Bl-04	0	Adcy7	61.1604	-4.33185	1.41325	-3.06518	0.00217539	0.0304149
Blood_0_Bl-04/Blood_0_control	Blood	Bl-04	0	Adgre5	481.158	-2.30955	0.696702	-3.31497	0.000916532	0.0200202
Blood_0_Bl-04/Blood_0_control	Blood	Bl-04	0	Adgrg1	644.403	1.79094	0.596484	3.0025	0.00267769	0.0339798
Blood_0_Bl-04/Blood_0_control	Blood	Bl-04	0	Adora2a	63.2528	-2.46257	0.760522	-3.238	0.00120371	0.0225744
Blood_0_Bl-04/Blood_0_control	Blood	Bl-04	0	Adrm1	85.2091	-2.33626	0.794172	-2.94176	0.00326356	0.037762
Blood_0_Bl-04/Blood_0_control	Blood	Bl-04	0	Adssl1	30.6514	-2.81793	0.853612	-3.30118	0.00096279	0.0205285
Blood_0_Bl-04/Blood_0_control	Blood	Bl-04	0	Agap1	285.486	2.09213	0.558133	3.74845	0.00017793	0.00939693
Blood_0_Bl-04/Blood_0_control	Blood	Bl-04	0	Agap2	21.9373	2.50053	0.766062	3.26413	0.001098	0.0215769
Blood_0_Bl-04/Blood_0_control	Blood	Bl-04	0	Ahnak	209.083	-2.94229	0.829266	-3.54807	0.000388069	0.0134531
Blood_0_Bl-04/Blood_0_control	Blood	Bl-04	0	Ahsa2	63.4932	1.81455	0.523216	3.46806	0.000524224	0.0153409
Blood_0_Bl-04/Blood_0_control	Blood	Bl-04	0	AI506816	16.5103	-2.7139	0.965287	-2.81149	0.00493122	0.0463309
Blood_0_Bl-04/Blood_0_control	Blood	Bl-04	0	AK157302	61.461	3.19991	0.790104	4.04999	5.12195e-05	0.00541006
Blood_0_Bl-04/Blood_0_control	Blood	Bl-04	0	Akap11	13.0489	-4.26108	1.50305	-2.83497	0.00458304	0.0447061
Blood_0_Bl-04/Blood_0_control	Blood	Bl-04	0	Akap8	125.46	-2.09627	0.66438	-3.15523	0.0016037	0.0261247
Blood_0_Bl-04/Blood_0_control	Blood	Bl-04	0	Akap9	93.9348	-2.61899	0.795808	-3.29098	0.000998373	0.0207662
Blood_0_Bl-04/Blood_0_control	Blood	Bl-04	0	Akip1	35.1559	-2.45606	0.825122	-2.9766	0.00291467	0.035495
Blood_0_Bl-04/Blood_0_control	Blood	Bl-04	0	Akirin2	1841.25	1.90384	0.665229	2.86193	0.0042107	0.0423577
Blood_0_Bl-04/Blood_0_control	Blood	Bl-04	0	Akr1b3	48.6933	-2.91971	0.767186	-3.80575	0.000141376	0.00844647
Blood_0_Bl-04/Blood_0_control	Blood	Bl-04	0	Aldh1l2	3.47583	6.48739	2.11925	3.06117	0.00220472	0.0307298
Blood_0_Bl-04/Blood_0_control	Blood	Bl-04	0	Aldh2	5531.04	1.71757	0.553273	3.10438	0.00190681	0.0283198
Blood_0_Bl-04/Blood_0_control	Blood	Bl-04	0	Aldh3b2	89.3534	2.76345	0.842117	3.28155	0.00103236	0.0210854
Blood_0_Bl-04/Blood_0_control	Blood	Bl-04	0	Aldoa	506.476	1.6772	0.570216	2.94135	0.00326787	0.037762
Blood_0_Bl-04/Blood_0_control	Blood	Bl-04	0	Alg14	62.4825	-1.3628	0.44566	-3.05794	0.00222864	0.0309356
Blood_0_Bl-04/Blood_0_control	Blood	Bl-04	0	Alg9	151.376	1.73204	0.594798	2.91199	0.00359139	0.0393899
Blood_0_Bl-04/Blood_0_control	Blood	Bl-04	0	Alkbh6	48.3407	-3.12601	0.794765	-3.93325	8.38046e-05	0.00662596
Blood_0_Bl-04/Blood_0_control	Blood	Bl-04	0	Alkbh8	68.3697	2.74181	0.646169	4.24318	2.20378e-05	0.00351923
Blood_0_Bl-04/Blood_0_control	Blood	Bl-04	0	Alyref	81.5268	2.48269	0.821088	3.02366	0.00249739	0.032845
Blood_0_Bl-04/Blood_0_control	Blood	Bl-04	0	Ambra1	54.5069	-1.85501	0.650805	-2.85033	0.00436736	0.0432894
Blood_0_Bl-04/Blood_0_control	Blood	Bl-04	0	Amdhd2	99.853	3.18334	0.837198	3.80237	0.00014332	0.00848869
Blood_0_Bl-04/Blood_0_control	Blood	Bl-04	0	Amy2a1	1528.76	22.2046	2.6475	8.38703	4.98598e-17	1.68526e-13
Blood_0_Bl-04/Blood_0_control	Blood	Bl-04	0	Amy2a4	923.384	24.2535	2.75637	8.79908	1.37948e-18	6.21686e-15
Blood_0_Bl-04/Blood_0_control	Blood	Bl-04	0	Amy2a5	116.023	19.2668	3.00321	6.41542	1.40433e-10	2.71236e-07
Blood_0_Bl-04/Blood_0_control	Blood	Bl-04	0	Anapc1	70.7641	-1.2929	0.408892	-3.16196	0.00156709	0.0258019
Blood_0_Bl-04/Blood_0_control	Blood	Bl-04	0	Anapc10	32.3231	-5.1059	1.80854	-2.82322	0.00475441	0.0453748
Blood_0_Bl-04/Blood_0_control	Blood	Bl-04	0	Anapc16	289.569	3.24158	0.954961	3.39447	0.000687617	0.0173704
Blood_0_Bl-04/Blood_0_control	Blood	Bl-04	0	Anapc2	61.4622	-1.88787	0.472845	-3.99258	6.53582e-05	0.0059706
Blood_0_Bl-04/Blood_0_control	Blood	Bl-04	0	Anapc7	67.4122	2.19402	0.612692	3.58096	0.00034234	0.0126806
Blood_0_Bl-04/Blood_0_control	Blood	Bl-04	0	Ankrd12	21.4212	2.47245	0.781858	3.16228	0.00156542	0.0258019
Blood_0_Bl-04/Blood_0_control	Blood	Bl-04	0	Ankrd24	10.6562	3.8106	1.31564	2.89638	0.00377501	0.0400299
Blood_0_Bl-04/Blood_0_control	Blood	Bl-04	0	Ano10	44.3301	-4.68987	0.890114	-5.26884	1.37285e-07	0.00012374
Blood_0_Bl-04/Blood_0_control	Blood	Bl-04	0	Ano8	7.76668	2.49496	0.879983	2.83524	0.00457914	0.0447003
Blood_0_Bl-04/Blood_0_control	Blood	Bl-04	0	Anp32a	221.591	-2.68201	0.649645	-4.12842	3.65261e-05	0.00470317
Blood_0_Bl-04/Blood_0_control	Blood	Bl-04	0	Anp32b	12894.7	3.24749	1.08356	2.99705	0.00272603	0.0342527
Blood_0_Bl-04/Blood_0_control	Blood	Bl-04	0	Anp32e	27.3972	2.37824	0.778149	3.05628	0.002241	0.0309799
Blood_0_Bl-04/Blood_0_control	Blood	Bl-04	0	Anxa6	213.872	2.50262	0.858564	2.91489	0.00355808	0.0392864
Blood_0_Bl-04/Blood_0_control	Blood	Bl-04	0	Ap3s2	55.633	-2.48345	0.875633	-2.83617	0.0045658	0.0446345
Blood_0_Bl-04/Blood_0_control	Blood	Bl-04	0	Ap4m1	40.6324	-1.89433	0.530635	-3.56993	0.000357081	0.0128759
Blood_0_Bl-04/Blood_0_control	Blood	Bl-04	0	Ap5s1	60.4055	3.05273	0.86117	3.54486	0.000392818	0.0135829
Blood_0_Bl-04/Blood_0_control	Blood	Bl-04	0	Apobr	10.6409	4.9073	1.71491	2.86155	0.00421573	0.0423767
Blood_0_Bl-04/Blood_0_control	Blood	Bl-04	0	Appl1	121.257	-2.23087	0.5111	-4.36485	1.27211e-05	0.0028665
Blood_0_Bl-04/Blood_0_control	Blood	Bl-04	0	Aqp1	449.739	2.55388	0.746833	3.41962	0.000627095	0.0165981
Blood_0_Bl-04/Blood_0_control	Blood	Bl-04	0	Arf6	346.057	-2.22658	0.618685	-3.5989	0.000319572	0.012331
Blood_0_Bl-04/Blood_0_control	Blood	Bl-04	0	Arfrp1	49.3199	-1.59545	0.519703	-3.06992	0.00214115	0.030249
Blood_0_Bl-04/Blood_0_control	Blood	Bl-04	0	Arhgap30	405.791	-1.61278	0.489376	-3.29557	0.000982207	0.0207158
Blood_0_Bl-04/Blood_0_control	Blood	Bl-04	0	Arhgef1	441.499	-1.50298	0.500103	-3.00533	0.0026529	0.0338744
Blood_0_Bl-04/Blood_0_control	Blood	Bl-04	0	Arhgef18	78.2099	-2.02716	0.502999	-4.03015	5.57423e-05	0.00566644
Blood_0_Bl-04/Blood_0_control	Blood	Bl-04	0	Arhgef6	82.723	-3.63671	1.0289	-3.53455	0.000408465	0.0138556
Blood_0_Bl-04/Blood_0_control	Blood	Bl-04	0	Arhgef7	128.216	-2.37992	0.763208	-3.11832	0.00181888	0.0275414
Blood_0_Bl-04/Blood_0_control	Blood	Bl-04	0	Arid4b	1112.59	2.94667	0.872285	3.37811	0.00072986	0.0176841
Blood_0_Bl-04/Blood_0_control	Blood	Bl-04	0	Arid5b	78.9802	-2.12758	0.707181	-3.00854	0.00262503	0.0337723
Blood_0_Bl-04/Blood_0_control	Blood	Bl-04	0	Arl11	60.0036	2.60421	0.716904	3.63258	0.000280598	0.0114613
Blood_0_Bl-04/Blood_0_control	Blood	Bl-04	0	Arl5b	25.3102	-3.14249	1.07211	-2.93112	0.00337747	0.0382749
Blood_0_Bl-04/Blood_0_control	Blood	Bl-04	0	Arl8b	140.185	4.47482	1.34404	3.32937	0.000870418	0.0194513
Blood_0_Bl-04/Blood_0_control	Blood	Bl-04	0	Armcx5	27.474	-2.03105	0.709962	-2.86078	0.00422598	0.0424166
Blood_0_Bl-04/Blood_0_control	Blood	Bl-04	0	Arnt2	20.5081	4.66397	1.61334	2.89088	0.00384163	0.0404656
Blood_0_Bl-04/Blood_0_control	Blood	Bl-04	0	Arpc5	48.2862	1.61096	0.536215	3.00432	0.00266171	0.0339174
Blood_0_Bl-04/Blood_0_control	Blood	Bl-04	0	Arrdc4	34.2443	-2.35819	0.80234	-2.93914	0.00329125	0.0378382
Blood_0_Bl-04/Blood_0_control	Blood	Bl-04	0	Arsb	60.7659	-3.45237	1.16092	-2.97382	0.00294121	0.0356305
Blood_0_Bl-04/Blood_0_control	Blood	Bl-04	0	Asb1	1055.13	1.86503	0.605544	3.07993	0.00207051	0.0295931
Blood_0_Bl-04/Blood_0_control	Blood	Bl-04	0	Asb13	79.0641	-2.21846	0.659865	-3.362	0.000773803	0.0180637
Blood_0_Bl-04/Blood_0_control	Blood	Bl-04	0	Asb6	32.4364	1.88293	0.546004	3.44857	0.000563569	0.0158085
Blood_0_Bl-04/Blood_0_control	Blood	Bl-04	0	Ash1l	150.916	-2.37955	0.643341	-3.69874	0.000216675	0.0101974
Blood_0_Bl-04/Blood_0_control	Blood	Bl-04	0	Ash2l	46.1359	-2.46096	0.568585	-4.32821	1.50326e-05	0.00307941
Blood_0_Bl-04/Blood_0_control	Blood	Bl-04	0	Aspm	512.157	2.76395	0.811954	3.40407	0.000663887	0.0170678
Blood_0_Bl-04/Blood_0_control	Blood	Bl-04	0	Atg16l2	65.7777	-1.95653	0.575085	-3.40216	0.000668546	0.0170678
Blood_0_Bl-04/Blood_0_control	Blood	Bl-04	0	Atm	84.359	-2.40233	0.792153	-3.03267	0.00242404	0.0323206
Blood_0_Bl-04/Blood_0_control	Blood	Bl-04	0	Atn1	103.605	-1.09636	0.381811	-2.87148	0.00408559	0.0419563
Blood_0_Bl-04/Blood_0_control	Blood	Bl-04	0	Atp10d	86.4311	-1.85826	0.618612	-3.00392	0.00266525	0.0339305
Blood_0_Bl-04/Blood_0_control	Blood	Bl-04	0	Atp11c	196.07	-3.68796	1.01214	-3.64371	0.000268732	0.0113186
Blood_0_Bl-04/Blood_0_control	Blood	Bl-04	0	Atp1b3	557.509	-2.25742	0.578234	-3.90399	9.46197e-05	0.00699048
Blood_0_Bl-04/Blood_0_control	Blood	Bl-04	0	Atp2b1	296.341	-1.77396	0.515946	-3.43828	0.000585433	0.0160515
Blood_0_Bl-04/Blood_0_control	Blood	Bl-04	0	Atp2b4	420.244	2.55493	0.55514	4.60233	4.17793e-06	0.00156904
Blood_0_Bl-04/Blood_0_control	Blood	Bl-04	0	Atp5e	1249.11	1.74634	0.609457	2.8654	0.00416482	0.0421785
Blood_0_Bl-04/Blood_0_control	Blood	Bl-04	0	Atp5h	1366.52	1.58657	0.424691	3.73582	0.000187101	0.00957135
Blood_0_Bl-04/Blood_0_control	Blood	Bl-04	0	Atp6v0c	307.273	0.989449	0.292015	3.38835	0.000703138	0.0173996
Blood_0_Bl-04/Blood_0_control	Blood	Bl-04	0	Atp6v0e	1146.94	2.63188	0.697316	3.7743	0.000160458	0.00878297
Blood_0_Bl-04/Blood_0_control	Blood	Bl-04	0	Atp6v1d	718.715	1.69742	0.519379	3.26818	0.00108242	0.0214266
Blood_0_Bl-04/Blood_0_control	Blood	Bl-04	0	Atp6v1g1	807.418	1.35747	0.388553	3.49367	0.000476434	0.0148419
Blood_0_Bl-04/Blood_0_control	Blood	Bl-04	0	Atp6v1h	146.261	-1.92567	0.624384	-3.08411	0.00204164	0.0294072
Blood_0_Bl-04/Blood_0_control	Blood	Bl-04	0	Atp7a	43.3641	-1.90532	0.688012	-2.76931	0.00561758	0.0498031
Blood_0_Bl-04/Blood_0_control	Blood	Bl-04	0	Atpif1	194.553	2.72853	0.818119	3.33513	0.000852603	0.019212
Blood_0_Bl-04/Blood_0_control	Blood	Bl-04	0	Aup1	287.204	1.44987	0.369047	3.92869	8.54097e-05	0.00668211
Blood_0_Bl-04/Blood_0_control	Blood	Bl-04	0	Aven	33.1358	-2.06509	0.725627	-2.84594	0.00442808	0.0436671
Blood_0_Bl-04/Blood_0_control	Blood	Bl-04	0	AW822073	19.6448	4.48412	1.52672	2.9371	0.00331302	0.0379272
Blood_0_Bl-04/Blood_0_control	Blood	Bl-04	0	Axin1	296.04	2.51578	0.890915	2.82382	0.0047455	0.0453565
Blood_0_Bl-04/Blood_0_control	Blood	Bl-04	0	AY358078	65.5285	4.1919	1.50363	2.78785	0.00530585	0.0481443
Blood_0_Bl-04/Blood_0_control	Blood	Bl-04	0	Azi2	215.768	-2.01112	0.642605	-3.12963	0.00175024	0.0271357
Blood_0_Bl-04/Blood_0_control	Blood	Bl-04	0	B4galt5	177.192	-1.76127	0.62696	-2.80922	0.00496622	0.0465898
Blood_0_Bl-04/Blood_0_control	Blood	Bl-04	0	Babam1	113.969	-1.86982	0.54579	-3.42589	0.00061278	0.0165981
Blood_0_Bl-04/Blood_0_control	Blood	Bl-04	0	Bbs12	11.4777	-5.43608	1.41941	-3.82982	0.000128235	0.00808333
Blood_0_Bl-04/Blood_0_control	Blood	Bl-04	0	BC100530	60.8577	4.53281	1.35841	3.33686	0.000847319	0.0191248
Blood_0_Bl-04/Blood_0_control	Blood	Bl-04	0	Bcl11a	12.4074	-3.85379	1.24039	-3.10692	0.00189046	0.028242
Blood_0_Bl-04/Blood_0_control	Blood	Bl-04	0	Bcl7b	195.791	1.99451	0.668586	2.98318	0.00285267	0.0350301
Blood_0_Bl-04/Blood_0_control	Blood	Bl-04	0	Bclaf3	41.6924	-2.20771	0.619442	-3.56402	0.000365215	0.0129879
Blood_0_Bl-04/Blood_0_control	Blood	Bl-04	0	Bcorl1	164.566	2.69593	0.784122	3.43814	0.000585714	0.0160515
Blood_0_Bl-04/Blood_0_control	Blood	Bl-04	0	Becn1	14674.4	2.00429	0.503406	3.98146	6.84931e-05	0.0060145
Blood_0_Bl-04/Blood_0_control	Blood	Bl-04	0	Bex3	70.793	1.74218	0.554757	3.14043	0.00168699	0.0267952
Blood_0_Bl-04/Blood_0_control	Blood	Bl-04	0	Bhlhe41	63.5802	-3.92187	1.1258	-3.48364	0.000494644	0.0151303
Blood_0_Bl-04/Blood_0_control	Blood	Bl-04	0	Birc6	538.632	-1.63508	0.440705	-3.71015	0.00020714	0.0100948
Blood_0_Bl-04/Blood_0_control	Blood	Bl-04	0	Blk	74.133	-2.46531	0.814929	-3.02518	0.00248484	0.0327437
Blood_0_Bl-04/Blood_0_control	Blood	Bl-04	0	Blnk	15.17	-5.30976	1.59849	-3.32173	0.000894615	0.0197957
Blood_0_Bl-04/Blood_0_control	Blood	Bl-04	0	Bloc1s3	69.8345	2.75338	0.793552	3.46969	0.000521062	0.0153292
Blood_0_Bl-04/Blood_0_control	Blood	Bl-04	0	Bmt2	174.77	-2.48629	0.784368	-3.1698	0.00152545	0.0254304
Blood_0_Bl-04/Blood_0_control	Blood	Bl-04	0	Brd1	134.417	-1.41768	0.411533	-3.44486	0.000571349	0.0159271
Blood_0_Bl-04/Blood_0_control	Blood	Bl-04	0	Brd9	200.754	-1.1226	0.378791	-2.96363	0.00304029	0.0362156
Blood_0_Bl-04/Blood_0_control	Blood	Bl-04	0	Brwd3	91.461	-2.14919	0.675825	-3.18011	0.00147222	0.0249511
Blood_0_Bl-04/Blood_0_control	Blood	Bl-04	0	Btbd1	199.607	-1.39439	0.474013	-2.94167	0.00326449	0.037762
Blood_0_Bl-04/Blood_0_control	Blood	Bl-04	0	Btbd35f17	138.386	3.9769	1.41719	2.8062	0.00501303	0.0466457
Blood_0_Bl-04/Blood_0_control	Blood	Bl-04	0	Btbd35f25	55.984	5.33211	1.69462	3.1465	0.00165237	0.0265006
Blood_0_Bl-04/Blood_0_control	Blood	Bl-04	0	Btbd35f30	82.2932	4.21523	1.46954	2.8684	0.00412553	0.0420226
Blood_0_Bl-04/Blood_0_control	Blood	Bl-04	0	Bud23	361.416	4.11595	1.12454	3.66011	0.00025211	0.0109248
Blood_0_Bl-04/Blood_0_control	Blood	Bl-04	0	C1qa	251.033	-4.56323	1.35281	-3.37314	0.000743153	0.0177831
Blood_0_Bl-04/Blood_0_control	Blood	Bl-04	0	C2cd5	128.572	1.46447	0.434452	3.37085	0.000749359	0.0178369
Blood_0_Bl-04/Blood_0_control	Blood	Bl-04	0	C87414	29.8358	6.14336	2.00153	3.06933	0.00214543	0.0302778
Blood_0_Bl-04/Blood_0_control	Blood	Bl-04	0	CAAA01118383.1	122.125	2.13788	0.534971	3.99626	6.4352e-05	0.0059706
Blood_0_Bl-04/Blood_0_control	Blood	Bl-04	0	Cacna1e	11.0926	-5.27577	1.77169	-2.97782	0.00290305	0.0354235
Blood_0_Bl-04/Blood_0_control	Blood	Bl-04	0	Cacul1	63.6647	-1.87233	0.643587	-2.90922	0.00362336	0.0394509
Blood_0_Bl-04/Blood_0_control	Blood	Bl-04	0	Calm3	397.541	2.24972	0.683855	3.28976	0.00100272	0.0207926
Blood_0_Bl-04/Blood_0_control	Blood	Bl-04	0	Caprin1	806.225	-1.90235	0.663133	-2.86873	0.00412119	0.0420226
Blood_0_Bl-04/Blood_0_control	Blood	Bl-04	0	Card11	105.238	-3.24557	0.909632	-3.568	0.000359718	0.0129002
Blood_0_Bl-04/Blood_0_control	Blood	Bl-04	0	Card6	97.5926	-1.85017	0.653331	-2.83191	0.00462712	0.0448519
Blood_0_Bl-04/Blood_0_control	Blood	Bl-04	0	Carhsp1	50.6783	3.27416	1.07933	3.03352	0.00241719	0.0323206
Blood_0_Bl-04/Blood_0_control	Blood	Bl-04	0	Carmil1	18.6903	-2.27783	0.810107	-2.81176	0.00492712	0.0463245
Blood_0_Bl-04/Blood_0_control	Blood	Bl-04	0	Cast	242.761	-1.37809	0.464301	-2.9681	0.0029965	0.0358967
Blood_0_Bl-04/Blood_0_control	Blood	Bl-04	0	Cbfa2t3	83.0389	-1.74333	0.589669	-2.95646	0.00311196	0.0366816
Blood_0_Bl-04/Blood_0_control	Blood	Bl-04	0	Cbx6	21.9171	-2.02599	0.664926	-3.04694	0.00231184	0.0315082
Blood_0_Bl-04/Blood_0_control	Blood	Bl-04	0	Ccdc12	594.823	3.23494	0.931216	3.47389	0.000512967	0.0152539
Blood_0_Bl-04/Blood_0_control	Blood	Bl-04	0	Ccdc125	25.8808	-2.19206	0.780823	-2.80737	0.00499481	0.0466457
Blood_0_Bl-04/Blood_0_control	Blood	Bl-04	0	Ccdc138	23.4953	-4.6942	1.60288	-2.9286	0.00340495	0.0383305
Blood_0_Bl-04/Blood_0_control	Blood	Bl-04	0	Ccdc167	101.392	1.2797	0.388588	3.29321	0.00099052	0.0207496
Blood_0_Bl-04/Blood_0_control	Blood	Bl-04	0	Ccdc171	64.2086	3.39022	0.815082	4.15936	3.19135e-05	0.00440276
Blood_0_Bl-04/Blood_0_control	Blood	Bl-04	0	Ccdc189	42.6101	3.64135	0.913122	3.98781	6.66873e-05	0.0059706
Blood_0_Bl-04/Blood_0_control	Blood	Bl-04	0	Ccdc47	266.161	-1.34607	0.456454	-2.94898	0.00318824	0.0371587
Blood_0_Bl-04/Blood_0_control	Blood	Bl-04	0	Ccdc50	104.732	-2.7612	0.818831	-3.37212	0.000745908	0.0178174
Blood_0_Bl-04/Blood_0_control	Blood	Bl-04	0	Ccdc63	5.70827	5.75931	1.94947	2.9543	0.00313381	0.0367598
Blood_0_Bl-04/Blood_0_control	Blood	Bl-04	0	Ccdc92	764.356	2.11422	0.682934	3.09579	0.00196287	0.0287633
Blood_0_Bl-04/Blood_0_control	Blood	Bl-04	0	Ccdc93	42.7189	-1.75541	0.559829	-3.13561	0.00171495	0.0269394
Blood_0_Bl-04/Blood_0_control	Blood	Bl-04	0	Ccndbp1	17.129	8.53508	2.13155	4.00416	6.2237e-05	0.00593971
Blood_0_Bl-04/Blood_0_control	Blood	Bl-04	0	Ccnf	49.9066	2.19092	0.673403	3.2535	0.00113991	0.0218915
Blood_0_Bl-04/Blood_0_control	Blood	Bl-04	0	Ccnh	91.0855	-2.46022	0.885846	-2.77726	0.00548192	0.0489553
Blood_0_Bl-04/Blood_0_control	Blood	Bl-04	0	Ccnt1	75.9823	-2.19837	0.723733	-3.03754	0.00238515	0.0321508
Blood_0_Bl-04/Blood_0_control	Blood	Bl-04	0	Ccr3	5.50651	-4.95057	1.58296	-3.12741	0.00176354	0.0271357
Blood_0_Bl-04/Blood_0_control	Blood	Bl-04	0	Cct2	250.084	-1.57557	0.565147	-2.78789	0.00530523	0.0481443
Blood_0_Bl-04/Blood_0_control	Blood	Bl-04	0	Cct4	566.446	-3.03796	0.748918	-4.05646	4.98223e-05	0.00534601
Blood_0_Bl-04/Blood_0_control	Blood	Bl-04	0	Cct5	758.153	-0.91913	0.299492	-3.06896	0.00214806	0.0302834
Blood_0_Bl-04/Blood_0_control	Blood	Bl-04	0	Cct7	445.476	2.06166	0.735133	2.80448	0.0050398	0.0466979
Blood_0_Bl-04/Blood_0_control	Blood	Bl-04	0	Cd180	63.7023	-4.25169	1.52565	-2.7868	0.00532309	0.0482684
Blood_0_Bl-04/Blood_0_control	Blood	Bl-04	0	Cd2	52.0502	-4.18526	1.18091	-3.5441	0.000393961	0.0135876
Blood_0_Bl-04/Blood_0_control	Blood	Bl-04	0	Cd2ap	178.044	2.38561	0.839778	2.84076	0.00450061	0.0442211
Blood_0_Bl-04/Blood_0_control	Blood	Bl-04	0	Cd36	737.796	1.68348	0.419947	4.00879	6.10302e-05	0.00589378
Blood_0_Bl-04/Blood_0_control	Blood	Bl-04	0	Cd38	35.9231	3.76096	1.35261	2.78053	0.00542704	0.048818
Blood_0_Bl-04/Blood_0_control	Blood	Bl-04	0	Cd53	1452.16	-2.75301	0.886516	-3.10542	0.00190006	0.0282605
Blood_0_Bl-04/Blood_0_control	Blood	Bl-04	0	Cd55b	151.653	-2.2581	0.809536	-2.78937	0.00528104	0.0480159
Blood_0_Bl-04/Blood_0_control	Blood	Bl-04	0	Cd79b	664.164	-2.6796	0.825161	-3.24737	0.00116479	0.0222428
Blood_0_Bl-04/Blood_0_control	Blood	Bl-04	0	Cd82	62.6851	2.99183	0.801842	3.73119	0.000190574	0.00964312
Blood_0_Bl-04/Blood_0_control	Blood	Bl-04	0	Cd86	42.8034	-2.29443	0.709851	-3.23227	0.00122809	0.0228123
Blood_0_Bl-04/Blood_0_control	Blood	Bl-04	0	Cdc25b	1253.45	2.39524	0.768697	3.11597	0.00183338	0.0276336
Blood_0_Bl-04/Blood_0_control	Blood	Bl-04	0	Cdc34	843.497	2.44824	0.577105	4.24229	2.21253e-05	0.00351923
Blood_0_Bl-04/Blood_0_control	Blood	Bl-04	0	Cdc37l1	88.653	-2.61321	0.889056	-2.93931	0.00328945	0.0378382
Blood_0_Bl-04/Blood_0_control	Blood	Bl-04	0	Cdc40	43.3314	-2.63613	0.773824	-3.40663	0.000657712	0.0170512
Blood_0_Bl-04/Blood_0_control	Blood	Bl-04	0	Cdc42bpg	37.9287	3.45314	1.13074	3.05387	0.00225908	0.0311343
Blood_0_Bl-04/Blood_0_control	Blood	Bl-04	0	Cdc6	16.4825	2.25179	0.75287	2.99094	0.00278117	0.0345851
Blood_0_Bl-04/Blood_0_control	Blood	Bl-04	0	Cdca5	13.0156	2.57206	0.790505	3.25369	0.00113915	0.0218915
Blood_0_Bl-04/Blood_0_control	Blood	Bl-04	0	Cdk5	55.0355	-1.78388	0.569661	-3.13148	0.00173926	0.0270908
Blood_0_Bl-04/Blood_0_control	Blood	Bl-04	0	Cdkn2d	72.9247	1.72594	0.560386	3.07991	0.00207064	0.0295931
Blood_0_Bl-04/Blood_0_control	Blood	Bl-04	0	Cdon	15.0583	-2.61102	0.868481	-3.00642	0.00264343	0.0338447
Blood_0_Bl-04/Blood_0_control	Blood	Bl-04	0	Cdv3	1132.04	4.2038	1.14588	3.66863	0.000243853	0.0106747
Blood_0_Bl-04/Blood_0_control	Blood	Bl-04	0	Ceacam1	389.556	-2.3117	0.775534	-2.98079	0.00287509	0.0352413
Blood_0_Bl-04/Blood_0_control	Blood	Bl-04	0	Cebpg	6.6567	-4.35713	1.52223	-2.86233	0.00420543	0.0423361
Blood_0_Bl-04/Blood_0_control	Blood	Bl-04	0	Cel	1134.64	4.71991	1.58165	2.98417	0.00284349	0.0349491
Blood_0_Bl-04/Blood_0_control	Blood	Bl-04	0	Cela3b	1043.69	4.64321	1.30586	3.55568	0.00037701	0.0132394
Blood_0_Bl-04/Blood_0_control	Blood	Bl-04	0	Celf2	187.266	-1.45511	0.516144	-2.8192	0.00481433	0.0456449
Blood_0_Bl-04/Blood_0_control	Blood	Bl-04	0	Celf5	4.23386	6.09449	1.85433	3.28663	0.00101394	0.0208769
Blood_0_Bl-04/Blood_0_control	Blood	Bl-04	0	Cenpa	52.4137	-5.07288	1.40796	-3.60299	0.000314581	0.0122569
Blood_0_Bl-04/Blood_0_control	Blood	Bl-04	0	Cenpv	62.2259	2.33383	0.745894	3.12891	0.00175456	0.0271357
Blood_0_Bl-04/Blood_0_control	Blood	Bl-04	0	Cep162	18.9765	-2.70564	0.7978	-3.39137	0.000695432	0.0173996
Blood_0_Bl-04/Blood_0_control	Blood	Bl-04	0	Cept1	1030.09	1.54314	0.50592	3.05017	0.00228715	0.0312743
Blood_0_Bl-04/Blood_0_control	Blood	Bl-04	0	Cercam	62.2246	1.86565	0.647612	2.88081	0.00396661	0.0412913
Blood_0_Bl-04/Blood_0_control	Blood	Bl-04	0	Cerk	122.843	1.20171	0.429875	2.79548	0.00518225	0.0474367
Blood_0_Bl-04/Blood_0_control	Blood	Bl-04	0	Cers5	74.9359	-1.60954	0.535134	-3.00774	0.00263202	0.0337723
Blood_0_Bl-04/Blood_0_control	Blood	Bl-04	0	Cfdp1	47.5362	-1.73416	0.576008	-3.01065	0.00260692	0.0336634
Blood_0_Bl-04/Blood_0_control	Blood	Bl-04	0	Cflar	228.157	1.5258	0.493909	3.08924	0.0020067	0.0290788
Blood_0_Bl-04/Blood_0_control	Blood	Bl-04	0	Cgnl1	38.7039	-3.45872	1.15056	-3.00613	0.00264599	0.0338447
Blood_0_Bl-04/Blood_0_control	Blood	Bl-04	0	Chid1	16.8282	-2.60955	0.792458	-3.29298	0.000991321	0.0207496
Blood_0_Bl-04/Blood_0_control	Blood	Bl-04	0	Chmp2b	131.494	-2.42136	0.684768	-3.53603	0.000406192	0.013833
Blood_0_Bl-04/Blood_0_control	Blood	Bl-04	0	Chst15	47.1074	-2.13725	0.707302	-3.02169	0.00251367	0.0329141
Blood_0_Bl-04/Blood_0_control	Blood	Bl-04	0	Chtop	331.417	-1.22046	0.304841	-4.0036	6.23845e-05	0.00593971
Blood_0_Bl-04/Blood_0_control	Blood	Bl-04	0	Cit	107.731	2.24872	0.586435	3.83456	0.00012579	0.00806008
Blood_0_Bl-04/Blood_0_control	Blood	Bl-04	0	Ciz1	115.37	-0.967399	0.325526	-2.9718	0.00296056	0.0357355
Blood_0_Bl-04/Blood_0_control	Blood	Bl-04	0	Clasp2	103.371	-1.42451	0.419325	-3.39716	0.000680887	0.0172713
Blood_0_Bl-04/Blood_0_control	Blood	Bl-04	0	Cldn9	3.72606	6.1365	2.13968	2.86794	0.00413148	0.0420298
Blood_0_Bl-04/Blood_0_control	Blood	Bl-04	0	Clec4a3	269.717	-3.09782	1.04652	-2.96011	0.00307527	0.0364397
Blood_0_Bl-04/Blood_0_control	Blood	Bl-04	0	Clip1	60.6237	-1.90521	0.480369	-3.96615	7.3043e-05	0.00606484
Blood_0_Bl-04/Blood_0_control	Blood	Bl-04	0	Clip2	104.338	2.71553	0.793341	3.42291	0.000619556	0.0165981
Blood_0_Bl-04/Blood_0_control	Blood	Bl-04	0	Clk3	57.0548	3.3337	0.92157	3.61741	0.000297568	0.0117635
Blood_0_Bl-04/Blood_0_control	Blood	Bl-04	0	Cln8	216.954	1.73454	0.47282	3.66851	0.00024397	0.0106747
Blood_0_Bl-04/Blood_0_control	Blood	Bl-04	0	Clns1a	73.3528	-4.11888	1.24998	-3.29515	0.000983696	0.0207158
Blood_0_Bl-04/Blood_0_control	Blood	Bl-04	0	Clock	29.5076	-3.49996	0.976357	-3.58471	0.000337454	0.012556
Blood_0_Bl-04/Blood_0_control	Blood	Bl-04	0	Cmas	1481	3.93873	1.04802	3.75824	0.000171111	0.00910796
Blood_0_Bl-04/Blood_0_control	Blood	Bl-04	0	Cmc1	65.78	-2.09682	0.73292	-2.86091	0.00422431	0.0424166
Blood_0_Bl-04/Blood_0_control	Blood	Bl-04	0	Cmc2	11.868	2.69723	0.929678	2.90125	0.00371678	0.0397869
Blood_0_Bl-04/Blood_0_control	Blood	Bl-04	0	Cmpk2	279.438	1.45467	0.474149	3.06796	0.00215523	0.0302952
Blood_0_Bl-04/Blood_0_control	Blood	Bl-04	0	Cmtm7	13.7055	-4.65053	1.55824	-2.98447	0.00284067	0.0349491
Blood_0_Bl-04/Blood_0_control	Blood	Bl-04	0	Cnot11	63.17	-1.4521	0.517923	-2.8037	0.005052	0.0467189
Blood_0_Bl-04/Blood_0_control	Blood	Bl-04	0	Col4a3bp	30.6484	-2.62448	0.721526	-3.63741	0.000275396	0.0113745
Blood_0_Bl-04/Blood_0_control	Blood	Bl-04	0	Colec12	43.957	-2.81094	0.816122	-3.44427	0.000572611	0.0159294
Blood_0_Bl-04/Blood_0_control	Blood	Bl-04	0	Commd10	79.7456	-1.65019	0.504616	-3.2702	0.00107473	0.0214266
Blood_0_Bl-04/Blood_0_control	Blood	Bl-04	0	Copb1	205.357	-1.44639	0.518669	-2.78867	0.00529255	0.0480882
Blood_0_Bl-04/Blood_0_control	Blood	Bl-04	0	Cox19	6.78105	4.3939	1.53756	2.8577	0.00426719	0.0426719
Blood_0_Bl-04/Blood_0_control	Blood	Bl-04	0	Cox6b1	1345.93	2.46577	0.750377	3.28604	0.00101605	0.0208769
Blood_0_Bl-04/Blood_0_control	Blood	Bl-04	0	Cox8a	101.991	3.03814	0.862195	3.52373	0.000425515	0.013896
Blood_0_Bl-04/Blood_0_control	Blood	Bl-04	0	Cpb1	806.98	7.34388	2.50802	2.92816	0.00340973	0.0383524
Blood_0_Bl-04/Blood_0_control	Blood	Bl-04	0	Cpeb3	65.7092	3.36236	0.866367	3.88099	0.000104033	0.00736399
Blood_0_Bl-04/Blood_0_control	Blood	Bl-04	0	Cpsf3	207.384	-2.42375	0.608936	-3.9803	6.88271e-05	0.0060145
Blood_0_Bl-04/Blood_0_control	Blood	Bl-04	0	Cpsf4	148.286	-1.1903	0.393575	-3.02433	0.00249187	0.0328044
Blood_0_Bl-04/Blood_0_control	Blood	Bl-04	0	Cpsf7	80.443	-1.75184	0.444594	-3.94031	8.13775e-05	0.00647191
Blood_0_Bl-04/Blood_0_control	Blood	Bl-04	0	Cr1l	502.495	-1.59631	0.470396	-3.39355	0.000689932	0.0173704
Blood_0_Bl-04/Blood_0_control	Blood	Bl-04	0	Cradd	35.5549	3.47013	1.08668	3.19332	0.00140647	0.0244729
Blood_0_Bl-04/Blood_0_control	Blood	Bl-04	0	Crebbp	1079.52	1.60059	0.504926	3.16994	0.0015247	0.0254304
Blood_0_Bl-04/Blood_0_control	Blood	Bl-04	0	Crkl	173.997	3.46148	0.741983	4.66517	3.0836e-06	0.00122619
Blood_0_Bl-04/Blood_0_control	Blood	Bl-04	0	Crtc1	22.8928	2.46545	0.86401	2.8535	0.00432405	0.0429861
Blood_0_Bl-04/Blood_0_control	Blood	Bl-04	0	Cry2	20.5714	-4.06226	1.22673	-3.31144	0.000928163	0.0201756
Blood_0_Bl-04/Blood_0_control	Blood	Bl-04	0	Cs	382.976	-1.80443	0.452135	-3.99091	6.58204e-05	0.0059706
Blood_0_Bl-04/Blood_0_control	Blood	Bl-04	0	Cse1l	284.245	-2.92845	0.707142	-4.14125	3.45424e-05	0.00453411
Blood_0_Bl-04/Blood_0_control	Blood	Bl-04	0	Csnk1g3	168.511	-3.95691	0.910107	-4.34775	1.37543e-05	0.00299933
Blood_0_Bl-04/Blood_0_control	Blood	Bl-04	0	Csprs	6.16903	7.71206	2.17722	3.54217	0.000396857	0.0136527
Blood_0_Bl-04/Blood_0_control	Blood	Bl-04	0	Csrp1	373.104	1.63328	0.442801	3.68853	0.000225551	0.0104047
Blood_0_Bl-04/Blood_0_control	Blood	Bl-04	0	Cstf1	21.3192	-5.13015	1.48314	-3.45898	0.000542224	0.0155645
Blood_0_Bl-04/Blood_0_control	Blood	Bl-04	0	Cstf2	116.868	-1.75604	0.431725	-4.0675	4.75197e-05	0.0052964
Blood_0_Bl-04/Blood_0_control	Blood	Bl-04	0	Ctdspl2	96.7736	-3.57395	1.0303	-3.46885	0.000522689	0.0153292
Blood_0_Bl-04/Blood_0_control	Blood	Bl-04	0	Ctps	25.9878	-1.66435	0.554647	-3.00074	0.00269321	0.0340278
Blood_0_Bl-04/Blood_0_control	Blood	Bl-04	0	Ctrb1	213.711	7.26378	2.43027	2.98888	0.00280001	0.0347362
Blood_0_Bl-04/Blood_0_control	Blood	Bl-04	0	Ctsc	276.935	-2.64851	0.944897	-2.80296	0.00506357	0.0467939
Blood_0_Bl-04/Blood_0_control	Blood	Bl-04	0	Ctss	735.243	-2.22891	0.764253	-2.91645	0.00354042	0.0391706
Blood_0_Bl-04/Blood_0_control	Blood	Bl-04	0	Ctxn1	9.70453	6.28442	2.01578	3.11762	0.00182319	0.0275414
Blood_0_Bl-04/Blood_0_control	Blood	Bl-04	0	Cuedc1	32.8233	1.94889	0.539806	3.61036	0.000305777	0.0119829
Blood_0_Bl-04/Blood_0_control	Blood	Bl-04	0	Cul4a	245.263	1.76782	0.486203	3.63597	0.000276932	0.0113803
Blood_0_Bl-04/Blood_0_control	Blood	Bl-04	0	Cul4b	162.081	1.17356	0.386724	3.03462	0.00240842	0.0323189
Blood_0_Bl-04/Blood_0_control	Blood	Bl-04	0	Cuzd1	6.54126	42.0591	3.81042	11.0379	2.50777e-28	1.69526e-24
Blood_0_Bl-04/Blood_0_control	Blood	Bl-04	0	Cxcr4	182.404	-2.555	0.81547	-3.13317	0.00172931	0.0270184
Blood_0_Bl-04/Blood_0_control	Blood	Bl-04	0	Cxcr5	51.1283	-4.09738	1.05838	-3.87135	0.000108233	0.00746584
Blood_0_Bl-04/Blood_0_control	Blood	Bl-04	0	Cyb5d1	47.1299	-2.8775	0.877827	-3.27798	0.00104554	0.0211612
Blood_0_Bl-04/Blood_0_control	Blood	Bl-04	0	Cybb	887.045	-2.85491	0.838105	-3.40638	0.000658294	0.0170512
Blood_0_Bl-04/Blood_0_control	Blood	Bl-04	0	Cyhr1	447.686	2.88062	1.0273	2.80406	0.00504627	0.0466979
Blood_0_Bl-04/Blood_0_control	Blood	Bl-04	0	Cyp20a1	42.5348	-2.33174	0.740182	-3.15023	0.00163143	0.0263839
Blood_0_Bl-04/Blood_0_control	Blood	Bl-04	0	Cyp2b10	66.774	1.70325	0.541209	3.14712	0.00164888	0.0264761
Blood_0_Bl-04/Blood_0_control	Blood	Bl-04	0	Cyp4f13	35.5241	3.19475	0.946136	3.37663	0.000733784	0.0177058
Blood_0_Bl-04/Blood_0_control	Blood	Bl-04	0	Cyp4v3	534.145	3.93301	1.17362	3.35117	0.000804707	0.0185659
Blood_0_Bl-04/Blood_0_control	Blood	Bl-04	0	Cys1	7.06594	5.45107	1.57408	3.46302	0.000534151	0.0154641
Blood_0_Bl-04/Blood_0_control	Blood	Bl-04	0	D10Wsu102e	34.6476	-2.54286	0.811132	-3.13495	0.00171886	0.0269394
Blood_0_Bl-04/Blood_0_control	Blood	Bl-04	0	D830030K20Rik	91.8071	8.1461	1.85823	4.3838	1.16628e-05	0.00279145
Blood_0_Bl-04/Blood_0_control	Blood	Bl-04	0	Daam1	168.639	1.93336	0.620976	3.11342	0.00184931	0.0277808
Blood_0_Bl-04/Blood_0_control	Blood	Bl-04	0	Daglb	29.8431	-1.60859	0.558853	-2.87838	0.00399719	0.0414433
Blood_0_Bl-04/Blood_0_control	Blood	Bl-04	0	Dazap1	180.843	-1.3521	0.432609	-3.12546	0.00177529	0.027213
Blood_0_Bl-04/Blood_0_control	Blood	Bl-04	0	Dbndd2	34.9962	-2.1018	0.653232	-3.21753	0.00129299	0.0234332
Blood_0_Bl-04/Blood_0_control	Blood	Bl-04	0	Dbnl	43.3504	-2.24144	0.700771	-3.19854	0.00138127	0.0242215
Blood_0_Bl-04/Blood_0_control	Blood	Bl-04	0	Dcaf11	114.721	2.27255	0.653238	3.4789	0.000503468	0.0151532
Blood_0_Bl-04/Blood_0_control	Blood	Bl-04	0	Dcaf13	68.4354	-1.38049	0.497793	-2.77323	0.00555031	0.0494336
Blood_0_Bl-04/Blood_0_control	Blood	Bl-04	0	Dcaf6	579.935	1.58892	0.491588	3.23221	0.00122836	0.0228123
Blood_0_Bl-04/Blood_0_control	Blood	Bl-04	0	Dcp1a	32.9936	-1.47817	0.498213	-2.96694	0.00300779	0.0359623
Blood_0_Bl-04/Blood_0_control	Blood	Bl-04	0	Dcps	56.0009	-1.27086	0.441303	-2.8798	0.00397928	0.0413413
Blood_0_Bl-04/Blood_0_control	Blood	Bl-04	0	Dctn2	267.989	1.54799	0.493857	3.13448	0.00172157	0.0269394
Blood_0_Bl-04/Blood_0_control	Blood	Bl-04	0	Dcun1d5	197.771	-2.49288	0.744798	-3.34706	0.000816743	0.0187476
Blood_0_Bl-04/Blood_0_control	Blood	Bl-04	0	Ddb2	35.0012	-4.31745	1.24786	-3.45988	0.000540426	0.015563
Blood_0_Bl-04/Blood_0_control	Blood	Bl-04	0	Ddhd1	95.9935	-1.61112	0.573685	-2.80837	0.00497933	0.0466208
Blood_0_Bl-04/Blood_0_control	Blood	Bl-04	0	Ddi2	149.261	-2.50995	0.895935	-2.80149	0.00508676	0.04688
Blood_0_Bl-04/Blood_0_control	Blood	Bl-04	0	Ddx18	84.7619	-1.43583	0.508855	-2.82168	0.00477726	0.0454346
Blood_0_Bl-04/Blood_0_control	Blood	Bl-04	0	Ddx23	89.8074	1.95338	0.588045	3.32183	0.000894307	0.0197957
Blood_0_Bl-04/Blood_0_control	Blood	Bl-04	0	Ddx24	226.794	-1.70152	0.463436	-3.67153	0.000241102	0.0106747
Blood_0_Bl-04/Blood_0_control	Blood	Bl-04	0	Ddx39b	105.175	-2.3863	0.831226	-2.87082	0.00409405	0.0419563
Blood_0_Bl-04/Blood_0_control	Blood	Bl-04	0	Ddx51	6.87297	-3.69433	1.33146	-2.77464	0.00552629	0.0492521
Blood_0_Bl-04/Blood_0_control	Blood	Bl-04	0	Ddx58	91.2626	-3.04553	0.885722	-3.43847	0.000585011	0.0160515
Blood_0_Bl-04/Blood_0_control	Blood	Bl-04	0	Defa22	296.524	2.66729	0.939724	2.83837	0.00453442	0.0444563
Blood_0_Bl-04/Blood_0_control	Blood	Bl-04	0	Defa3	57.7751	2.9956	0.973595	3.07684	0.00209208	0.029805
Blood_0_Bl-04/Blood_0_control	Blood	Bl-04	0	Defa30	561.71	2.66183	0.859461	3.09709	0.00195432	0.02872
Blood_0_Bl-04/Blood_0_control	Blood	Bl-04	0	Defa32	64.2821	2.80215	0.90861	3.084	0.00204241	0.0294072
Blood_0_Bl-04/Blood_0_control	Blood	Bl-04	0	Defa35	75.547	3.28459	0.995096	3.30078	0.000964171	0.0205285
Blood_0_Bl-04/Blood_0_control	Blood	Bl-04	0	Dennd6a	16.9513	3.57202	1.07643	3.31838	0.000905419	0.0199029
Blood_0_Bl-04/Blood_0_control	Blood	Bl-04	0	Derl1	452.292	1.78391	0.509119	3.50391	0.00045848	0.0144828
Blood_0_Bl-04/Blood_0_control	Blood	Bl-04	0	Dgkd	287.877	-2.68234	0.894762	-2.99783	0.00271909	0.0342292
Blood_0_Bl-04/Blood_0_control	Blood	Bl-04	0	Dgkq	40.8103	3.11199	1.08348	2.87222	0.00407599	0.0419386
Blood_0_Bl-04/Blood_0_control	Blood	Bl-04	0	Dhx9	156.716	-2.75189	0.836396	-3.29018	0.00100124	0.0207926
Blood_0_Bl-04/Blood_0_control	Blood	Bl-04	0	Dicer1	23.2022	-1.93495	0.622766	-3.10702	0.00188985	0.028242
Blood_0_Bl-04/Blood_0_control	Blood	Bl-04	0	Dlat	65.478	3.19777	1.00216	3.1909	0.00141833	0.0245513
Blood_0_Bl-04/Blood_0_control	Blood	Bl-04	0	Dld	90.4368	-2.4538	0.792167	-3.09758	0.00195109	0.0287038
Blood_0_Bl-04/Blood_0_control	Blood	Bl-04	0	Dlg1	263.147	-1.64112	0.565975	-2.89964	0.00373588	0.039846
Blood_0_Bl-04/Blood_0_control	Blood	Bl-04	0	Dlst	463.015	-1.7842	0.604206	-2.95297	0.00314731	0.0367775
Blood_0_Bl-04/Blood_0_control	Blood	Bl-04	0	Dnajb2	171.992	1.93173	0.44196	4.37083	1.23775e-05	0.00283634
Blood_0_Bl-04/Blood_0_control	Blood	Bl-04	0	Dnajb4	100.148	2.37131	0.726772	3.2628	0.00110318	0.0216058
Blood_0_Bl-04/Blood_0_control	Blood	Bl-04	0	Dnajc11	59.786	-1.79596	0.60511	-2.96799	0.00299759	0.0358967
Blood_0_Bl-04/Blood_0_control	Blood	Bl-04	0	Dnajc18	12.996	-4.15863	1.47445	-2.82046	0.00479556	0.0455054
Blood_0_Bl-04/Blood_0_control	Blood	Bl-04	0	Dnajc2	103.235	-2.16632	0.700257	-3.09361	0.0019774	0.0288374
Blood_0_Bl-04/Blood_0_control	Blood	Bl-04	0	Dnase1l1	212.775	1.36977	0.450298	3.04191	0.00235079	0.031891
Blood_0_Bl-04/Blood_0_control	Blood	Bl-04	0	Dnmt3b	10.2571	-3.8187	1.36697	-2.79355	0.00521323	0.0476558
Blood_0_Bl-04/Blood_0_control	Blood	Bl-04	0	Dock1	40.3985	-3.39186	0.994722	-3.40986	0.000649963	0.01703
Blood_0_Bl-04/Blood_0_control	Blood	Bl-04	0	Dock10	344.539	-1.66868	0.571212	-2.92129	0.00348586	0.0388211
Blood_0_Bl-04/Blood_0_control	Blood	Bl-04	0	Dock2	213.602	-2.89701	0.922217	-3.14135	0.00168172	0.0267746
Blood_0_Bl-04/Blood_0_control	Blood	Bl-04	0	Dock4	15.5709	3.5327	1.08546	3.25458	0.00113559	0.0218915
Blood_0_Bl-04/Blood_0_control	Blood	Bl-04	0	Dock9	16.7345	-2.91116	1.03731	-2.80645	0.00500903	0.0466457
Blood_0_Bl-04/Blood_0_control	Blood	Bl-04	0	Dopey1	45.0304	-3.74721	0.932714	-4.01753	5.88108e-05	0.00576175
Blood_0_Bl-04/Blood_0_control	Blood	Bl-04	0	Dpagt1	47.4707	-2.41123	0.807733	-2.98518	0.00283407	0.0349491
Blood_0_Bl-04/Blood_0_control	Blood	Bl-04	0	Dpf3	469.917	1.66189	0.553923	3.00021	0.00269793	0.0340278
Blood_0_Bl-04/Blood_0_control	Blood	Bl-04	0	Dpm1	796.89	1.67944	0.572889	2.93153	0.00337294	0.0382749
Blood_0_Bl-04/Blood_0_control	Blood	Bl-04	0	Drg1	242.582	-1.41072	0.454225	-3.10577	0.00189784	0.0282605
Blood_0_Bl-04/Blood_0_control	Blood	Bl-04	0	Drosha	28.6249	-1.76747	0.617173	-2.86381	0.00418576	0.0422956
Blood_0_Bl-04/Blood_0_control	Blood	Bl-04	0	Dtd1	29.9588	-2.33521	0.667062	-3.50074	0.000463965	0.0145879
Blood_0_Bl-04/Blood_0_control	Blood	Bl-04	0	Dus3l	58.7344	-1.84071	0.482571	-3.81438	0.000136528	0.0083523
Blood_0_Bl-04/Blood_0_control	Blood	Bl-04	0	Dusp14	20.9507	1.92183	0.680381	2.82464	0.0047334	0.0453565
Blood_0_Bl-04/Blood_0_control	Blood	Bl-04	0	Dync1i2	164.258	-2.08729	0.711976	-2.93168	0.0033713	0.0382749
Blood_0_Bl-04/Blood_0_control	Blood	Bl-04	0	Dync1li1	142.636	-2.69222	0.955109	-2.81875	0.00482107	0.0456768
Blood_0_Bl-04/Blood_0_control	Blood	Bl-04	0	E130308A19Rik	20.0799	3.18471	0.609915	5.22157	1.77415e-07	0.000141097
Blood_0_Bl-04/Blood_0_control	Blood	Bl-04	0	E2f2	775.203	2.98969	1.00958	2.96133	0.00306313	0.0363967
Blood_0_Bl-04/Blood_0_control	Blood	Bl-04	0	E2f7	28.955	2.88672	1.01616	2.84082	0.00449983	0.0442211
Blood_0_Bl-04/Blood_0_control	Blood	Bl-04	0	Eaf1	18.5617	2.88488	0.94258	3.06062	0.00220881	0.030755
Blood_0_Bl-04/Blood_0_control	Blood	Bl-04	0	Eapp	240.723	1.59369	0.505298	3.15397	0.00161068	0.0261736
Blood_0_Bl-04/Blood_0_control	Blood	Bl-04	0	Ecm1	3942.86	2.42623	0.805043	3.01378	0.00258011	0.0334206
Blood_0_Bl-04/Blood_0_control	Blood	Bl-04	0	Edc3	43.0265	-1.62963	0.447554	-3.6412	0.000271371	0.0113589
Blood_0_Bl-04/Blood_0_control	Blood	Bl-04	0	Edem3	55.4356	-2.43186	0.878296	-2.76884	0.00562555	0.0498411
Blood_0_Bl-04/Blood_0_control	Blood	Bl-04	0	Ednrb	25.5103	-6.75789	1.88155	-3.59165	0.000328587	0.012444
Blood_0_Bl-04/Blood_0_control	Blood	Bl-04	0	Eef1d	488.479	0.979679	0.349064	2.80659	0.00500695	0.0466457
Blood_0_Bl-04/Blood_0_control	Blood	Bl-04	0	Eef1g	568.616	-2.02589	0.472329	-4.28916	1.79348e-05	0.00332162
Blood_0_Bl-04/Blood_0_control	Blood	Bl-04	0	Efl1	31.5291	-3.17679	0.78734	-4.03484	5.4639e-05	0.00559636
Blood_0_Bl-04/Blood_0_control	Blood	Bl-04	0	Efr3a	34.8964	-2.96018	1.03782	-2.85231	0.00434026	0.0431048
Blood_0_Bl-04/Blood_0_control	Blood	Bl-04	0	Eftud2	171.23	-1.28531	0.266768	-4.81808	1.44945e-06	0.0007258
Blood_0_Bl-04/Blood_0_control	Blood	Bl-04	0	Ehbp1	27.9885	-2.87761	0.9833	-2.92648	0.00342816	0.0384386
Blood_0_Bl-04/Blood_0_control	Blood	Bl-04	0	Eid2b	14.7259	-3.81161	1.09125	-3.49287	0.000477864	0.0148522
Blood_0_Bl-04/Blood_0_control	Blood	Bl-04	0	Eif2a	63.3379	-2.20992	0.740193	-2.9856	0.00283019	0.0349491
Blood_0_Bl-04/Blood_0_control	Blood	Bl-04	0	Eif2ak2	514.243	1.35125	0.419371	3.2221	0.00127256	0.023173
Blood_0_Bl-04/Blood_0_control	Blood	Bl-04	0	Eif2b4	64.2234	-1.70441	0.54917	-3.1036	0.00191178	0.0283414
Blood_0_Bl-04/Blood_0_control	Blood	Bl-04	0	Eif3b	49.1954	-3.36388	0.8533	-3.9422	8.0739e-05	0.00645912
Blood_0_Bl-04/Blood_0_control	Blood	Bl-04	0	Eif3d	357.764	-1.58407	0.48568	-3.26155	0.00110804	0.0216172
Blood_0_Bl-04/Blood_0_control	Blood	Bl-04	0	Eif3l	136.671	-2.69145	0.958927	-2.80673	0.00500476	0.0466457
Blood_0_Bl-04/Blood_0_control	Blood	Bl-04	0	Eif4a1	791.357	-1.50684	0.533513	-2.82438	0.00473717	0.0453565
Blood_0_Bl-04/Blood_0_control	Blood	Bl-04	0	Eif4ebp1	205.587	1.46746	0.493503	2.97355	0.00294373	0.0356305
Blood_0_Bl-04/Blood_0_control	Blood	Bl-04	0	Eif4g2	150.601	-2.06314	0.540012	-3.82055	0.000133152	0.00826748
Blood_0_Bl-04/Blood_0_control	Blood	Bl-04	0	Eipr1	164.111	1.89095	0.571389	3.30938	0.000935022	0.0201756
Blood_0_Bl-04/Blood_0_control	Blood	Bl-04	0	Elac2	97.0549	-1.87906	0.560817	-3.35058	0.000806423	0.0185738
Blood_0_Bl-04/Blood_0_control	Blood	Bl-04	0	Ell2	11819.4	3.58101	1.0351	3.45958	0.00054102	0.015563
Blood_0_Bl-04/Blood_0_control	Blood	Bl-04	0	Elmsan1	64.7991	-1.88578	0.507385	-3.71667	0.000201864	0.00992652
Blood_0_Bl-04/Blood_0_control	Blood	Bl-04	0	Elp5	142.293	1.53132	0.477581	3.20641	0.00134402	0.0238328
Blood_0_Bl-04/Blood_0_control	Blood	Bl-04	0	Emc1	20.606	-3.54112	1.08345	-3.26838	0.00108164	0.0214266
Blood_0_Bl-04/Blood_0_control	Blood	Bl-04	0	Emc3	4.19373	6.07633	1.59694	3.80498	0.000141816	0.00844647
Blood_0_Bl-04/Blood_0_control	Blood	Bl-04	0	Eml4	61.1239	-3.19112	0.922818	-3.45802	0.000544166	0.0155773
Blood_0_Bl-04/Blood_0_control	Blood	Bl-04	0	Emp3	88.2595	-4.14104	1.36381	-3.03638	0.00239437	0.0322429
Blood_0_Bl-04/Blood_0_control	Blood	Bl-04	0	Enah	12.3842	3.31359	0.981154	3.37724	0.000732175	0.0177058
Blood_0_Bl-04/Blood_0_control	Blood	Bl-04	0	Entpd4	29.5115	-2.77431	0.718153	-3.86311	0.000111952	0.00753032
Blood_0_Bl-04/Blood_0_control	Blood	Bl-04	0	Epc2	103.55	-4.07461	1.18377	-3.44206	0.00057731	0.0159943
Blood_0_Bl-04/Blood_0_control	Blood	Bl-04	0	Epm2aip1	21.3823	-4.26034	1.44193	-2.95461	0.00313064	0.0367598
Blood_0_Bl-04/Blood_0_control	Blood	Bl-04	0	Epn1	1369.79	2.23285	0.555602	4.0188	5.84956e-05	0.00576175
Blood_0_Bl-04/Blood_0_control	Blood	Bl-04	0	Eps8	66.5376	-2.97405	0.890512	-3.33971	0.000838653	0.0190072
Blood_0_Bl-04/Blood_0_control	Blood	Bl-04	0	Erc1	12.3212	2.02696	0.690059	2.93737	0.00331004	0.0379252
Blood_0_Bl-04/Blood_0_control	Blood	Bl-04	0	Erich1	22.6884	-2.1721	0.745435	-2.91387	0.00356977	0.0392864
Blood_0_Bl-04/Blood_0_control	Blood	Bl-04	0	Erlin1	33.0002	-3.87598	1.3464	-2.87877	0.00399234	0.0414248
Blood_0_Bl-04/Blood_0_control	Blood	Bl-04	0	Ero1lb	44.6912	-6.60183	1.39645	-4.72759	2.27206e-06	0.00102394
Blood_0_Bl-04/Blood_0_control	Blood	Bl-04	0	Erp29	364.834	-1.37884	0.390523	-3.53076	0.000414372	0.0138556
Blood_0_Bl-04/Blood_0_control	Blood	Bl-04	0	Erp44	287.682	-2.4894	0.740399	-3.36224	0.00077313	0.0180637
Blood_0_Bl-04/Blood_0_control	Blood	Bl-04	0	Esam	125.043	2.20093	0.516816	4.25864	2.05675e-05	0.0034759
Blood_0_Bl-04/Blood_0_control	Blood	Bl-04	0	Esf1	49.5468	-1.98512	0.642568	-3.08935	0.00200595	0.0290788
Blood_0_Bl-04/Blood_0_control	Blood	Bl-04	0	Esr2	7.66921	6.41783	2.0002	3.2086	0.00133385	0.0238214
Blood_0_Bl-04/Blood_0_control	Blood	Bl-04	0	Etf1	124.634	-2.25923	0.675236	-3.34583	0.000820354	0.0187668
Blood_0_Bl-04/Blood_0_control	Blood	Bl-04	0	Evi2a	157.442	-1.9175	0.676809	-2.83315	0.00460921	0.0447676
Blood_0_Bl-04/Blood_0_control	Blood	Bl-04	0	Ewsr1	145.611	-2.26773	0.745014	-3.04388	0.00233552	0.0317988
Blood_0_Bl-04/Blood_0_control	Blood	Bl-04	0	Exoc3l	11.756	3.62411	1.30409	2.77904	0.0054519	0.048944
Blood_0_Bl-04/Blood_0_control	Blood	Bl-04	0	Exoc3l2	7.44162	4.62947	1.5134	3.05899	0.00222081	0.0308903
Blood_0_Bl-04/Blood_0_control	Blood	Bl-04	0	Exoc6b	21.3841	-2.83361	0.824254	-3.43778	0.000586496	0.0160515
Blood_0_Bl-04/Blood_0_control	Blood	Bl-04	0	Exosc2	20.8255	-1.9232	0.675466	-2.84722	0.00441029	0.0435535
Blood_0_Bl-04/Blood_0_control	Blood	Bl-04	0	Exosc3	100.04	-1.76412	0.554553	-3.18116	0.00146686	0.0249458
Blood_0_Bl-04/Blood_0_control	Blood	Bl-04	0	Exosc8	30.1102	-3.4149	1.09964	-3.10548	0.00189971	0.0282605
Blood_0_Bl-04/Blood_0_control	Blood	Bl-04	0	Exosc9	287.578	2.29314	0.75358	3.043	0.00234235	0.0318598
Blood_0_Bl-04/Blood_0_control	Blood	Bl-04	0	F830016B08Rik	21.4188	-5.22954	1.83198	-2.85458	0.00430934	0.0428725
Blood_0_Bl-04/Blood_0_control	Blood	Bl-04	0	Fabp7	75.7965	-4.62412	1.48734	-3.109	0.00187724	0.0281067
Blood_0_Bl-04/Blood_0_control	Blood	Bl-04	0	Fads3	3.8313	4.97964	1.57371	3.16428	0.00155469	0.0256961
Blood_0_Bl-04/Blood_0_control	Blood	Bl-04	0	Fam117b	42.6459	-3.28599	1.10094	-2.98472	0.00283834	0.0349491
Blood_0_Bl-04/Blood_0_control	Blood	Bl-04	0	Fam120b	51.5178	-1.87095	0.457463	-4.08985	4.31655e-05	0.00516638
Blood_0_Bl-04/Blood_0_control	Blood	Bl-04	0	Fam122b	17.1726	-2.46489	0.768159	-3.20883	0.00133275	0.0238214
Blood_0_Bl-04/Blood_0_control	Blood	Bl-04	0	Fam129b	19.0948	-5.52264	1.46527	-3.76903	0.000163883	0.00889837
Blood_0_Bl-04/Blood_0_control	Blood	Bl-04	0	Fam129c	49.7322	2.37371	0.833061	2.84939	0.00438038	0.0433785
Blood_0_Bl-04/Blood_0_control	Blood	Bl-04	0	Fam160b1	90.4181	-1.63687	0.590355	-2.77268	0.00555965	0.0494734
Blood_0_Bl-04/Blood_0_control	Blood	Bl-04	0	Fam167b	21.2828	4.97575	1.75706	2.83186	0.00462784	0.0448519
Blood_0_Bl-04/Blood_0_control	Blood	Bl-04	0	Fam168b	50.2415	-2.45095	0.853826	-2.87055	0.00409763	0.0419563
Blood_0_Bl-04/Blood_0_control	Blood	Bl-04	0	Fam169b	51.5019	-3.94693	0.797162	-4.95123	7.37472e-07	0.000433506
Blood_0_Bl-04/Blood_0_control	Blood	Bl-04	0	Fam174b	184.59	3.04515	0.725021	4.20009	2.66808e-05	0.00390925
Blood_0_Bl-04/Blood_0_control	Blood	Bl-04	0	Fam204a	392.834	2.05362	0.736975	2.78656	0.0053271	0.0482723
Blood_0_Bl-04/Blood_0_control	Blood	Bl-04	0	Fam208b	128.498	-1.49447	0.392415	-3.80838	0.000139878	0.00840513
Blood_0_Bl-04/Blood_0_control	Blood	Bl-04	0	Fam220a	2866.31	2.26378	0.703229	3.21913	0.00128582	0.023366
Blood_0_Bl-04/Blood_0_control	Blood	Bl-04	0	Fam3c	90.7446	-2.53554	0.615215	-4.12139	3.76592e-05	0.00475843
Blood_0_Bl-04/Blood_0_control	Blood	Bl-04	0	Fam45a	7.06358	3.05098	0.938863	3.24965	0.00115546	0.022096
Blood_0_Bl-04/Blood_0_control	Blood	Bl-04	0	Fam49a	64.6299	-3.35762	0.787212	-4.26521	1.99716e-05	0.00341961
Blood_0_Bl-04/Blood_0_control	Blood	Bl-04	0	Fam8a1	137.675	2.13194	0.669309	3.18529	0.0014461	0.0248112
Blood_0_Bl-04/Blood_0_control	Blood	Bl-04	0	Fam91a1	38.4437	-2.3711	0.702489	-3.37528	0.000737405	0.0177082
Blood_0_Bl-04/Blood_0_control	Blood	Bl-04	0	Fanca	8.61779	3.63366	1.3016	2.79167	0.00524361	0.0478188
Blood_0_Bl-04/Blood_0_control	Blood	Bl-04	0	Far1	115.552	-3.13771	0.85203	-3.68263	0.000230838	0.0105082
Blood_0_Bl-04/Blood_0_control	Blood	Bl-04	0	Fbln1	37.5126	-3.29821	1.0053	-3.28081	0.00103509	0.0210854
Blood_0_Bl-04/Blood_0_control	Blood	Bl-04	0	Fbxl2	52.7509	4.07109	1.16718	3.48797	0.000486708	0.0149893
Blood_0_Bl-04/Blood_0_control	Blood	Bl-04	0	Fbxo18	239.684	-1.23826	0.325724	-3.80157	0.00014378	0.00848869
Blood_0_Bl-04/Blood_0_control	Blood	Bl-04	0	Fbxo2	29.9057	3.07292	0.8998	3.41511	0.000637563	0.0168028
Blood_0_Bl-04/Blood_0_control	Blood	Bl-04	0	Fbxw11	301.275	3.35721	1.1289	2.97386	0.00294076	0.0356305
Blood_0_Bl-04/Blood_0_control	Blood	Bl-04	0	Fbxw8	39.8992	-2.50047	0.700308	-3.57053	0.000356263	0.0128759
Blood_0_Bl-04/Blood_0_control	Blood	Bl-04	0	Fcgr2b	654.94	-2.43082	0.659242	-3.68729	0.000226653	0.0104047
Blood_0_Bl-04/Blood_0_control	Blood	Bl-04	0	Fcgr3	918.536	-2.54005	0.784457	-3.23797	0.00120385	0.0225744
Blood_0_Bl-04/Blood_0_control	Blood	Bl-04	0	Fcna	183.36	-3.71156	1.15762	-3.2062	0.001345	0.0238328
Blood_0_Bl-04/Blood_0_control	Blood	Bl-04	0	Fcrls	8.21714	-6.40316	1.95737	-3.27131	0.00107051	0.0214266
Blood_0_Bl-04/Blood_0_control	Blood	Bl-04	0	Fdx1	108.138	-5.49274	1.60318	-3.42616	0.000612171	0.0165981
Blood_0_Bl-04/Blood_0_control	Blood	Bl-04	0	Fgd4	205.514	-2.63988	0.837748	-3.15117	0.00162619	0.0263623
Blood_0_Bl-04/Blood_0_control	Blood	Bl-04	0	Fgfr1	128.86	-3.8651	1.13387	-3.40878	0.000652548	0.0170318
Blood_0_Bl-04/Blood_0_control	Blood	Bl-04	0	Fhad1	8.43565	4.2187	1.34308	3.14107	0.00168332	0.0267746
Blood_0_Bl-04/Blood_0_control	Blood	Bl-04	0	Filip1l	321.909	-2.29379	0.536367	-4.27654	1.89823e-05	0.003333
Blood_0_Bl-04/Blood_0_control	Blood	Bl-04	0	Fkbp3	37.2763	-1.60006	0.483317	-3.31059	0.00093101	0.0201756
Blood_0_Bl-04/Blood_0_control	Blood	Bl-04	0	Fkbp8	621.802	1.00332	0.355132	2.8252	0.00472508	0.0453565
Blood_0_Bl-04/Blood_0_control	Blood	Bl-04	0	Fkrp	55.9671	-1.72626	0.548428	-3.14765	0.00164588	0.0264761
Blood_0_Bl-04/Blood_0_control	Blood	Bl-04	0	Fn1	4300.17	-2.97826	0.994398	-2.99504	0.00274413	0.0343843
Blood_0_Bl-04/Blood_0_control	Blood	Bl-04	0	Fndc3a	143.457	-1.06272	0.362813	-2.92911	0.00339936	0.0382995
Blood_0_Bl-04/Blood_0_control	Blood	Bl-04	0	Fosl1	12.628	6.07037	2.1148	2.87042	0.00409921	0.0419563
Blood_0_Bl-04/Blood_0_control	Blood	Bl-04	0	Foxj3	201.161	-2.57441	0.545971	-4.71528	2.4138e-06	0.00105273
Blood_0_Bl-04/Blood_0_control	Blood	Bl-04	0	Foxm1	6.49566	3.41409	1.2104	2.82064	0.00479277	0.0455054
Blood_0_Bl-04/Blood_0_control	Blood	Bl-04	0	Foxo3	2167.1	1.56867	0.409658	3.82923	0.000128544	0.00808333
Blood_0_Bl-04/Blood_0_control	Blood	Bl-04	0	Foxp1	227.083	-1.71395	0.578268	-2.96393	0.00303735	0.0362124
Blood_0_Bl-04/Blood_0_control	Blood	Bl-04	0	Fpgt	8.09874	-4.60581	1.46293	-3.14836	0.00164192	0.0264761
Blood_0_Bl-04/Blood_0_control	Blood	Bl-04	0	Frat1	30.8148	2.60162	0.815697	3.18944	0.0014255	0.0245513
Blood_0_Bl-04/Blood_0_control	Blood	Bl-04	0	Frmd4a	99.5	1.67126	0.467586	3.57422	0.00035127	0.0128704
Blood_0_Bl-04/Blood_0_control	Blood	Bl-04	0	Frrs1	55.2336	1.78622	0.524459	3.40584	0.000659601	0.0170512
Blood_0_Bl-04/Blood_0_control	Blood	Bl-04	0	Fundc2	98.4336	2.03035	0.721846	2.81272	0.00491246	0.0463106
Blood_0_Bl-04/Blood_0_control	Blood	Bl-04	0	Gabpa	114.555	-2.61926	0.538918	-4.86022	1.17254e-06	0.000635595
Blood_0_Bl-04/Blood_0_control	Blood	Bl-04	0	Gal3st2b	6.02995	4.73595	1.64073	2.88649	0.00389566	0.0408923
Blood_0_Bl-04/Blood_0_control	Blood	Bl-04	0	Galnt9	20.4063	-3.85659	1.30035	-2.96582	0.0030188	0.0360549
Blood_0_Bl-04/Blood_0_control	Blood	Bl-04	0	Ganab	62.5005	2.30577	0.821649	2.80627	0.00501192	0.0466457
Blood_0_Bl-04/Blood_0_control	Blood	Bl-04	0	Gatad2a	598.632	1.36713	0.451462	3.02822	0.00246002	0.0325403
Blood_0_Bl-04/Blood_0_control	Blood	Bl-04	0	Gbf1	137.819	-1.7735	0.529738	-3.34788	0.00081433	0.018724
Blood_0_Bl-04/Blood_0_control	Blood	Bl-04	0	Gclm	3161.76	1.8121	0.474518	3.81882	0.000134089	0.00826748
Blood_0_Bl-04/Blood_0_control	Blood	Bl-04	0	Gfod1	28.2168	2.92677	1.02248	2.86242	0.00420414	0.0423361
Blood_0_Bl-04/Blood_0_control	Blood	Bl-04	0	Gga3	39.0039	-1.84067	0.53709	-3.42712	0.000610015	0.0165944
Blood_0_Bl-04/Blood_0_control	Blood	Bl-04	0	Ggt5	13.0016	2.69552	0.890182	3.02805	0.00246137	0.0325403
Blood_0_Bl-04/Blood_0_control	Blood	Bl-04	0	Gid8	22.4556	7.01755	1.37165	5.11615	3.11835e-07	0.000210801
Blood_0_Bl-04/Blood_0_control	Blood	Bl-04	0	Gimap4	1136.67	-1.52381	0.538661	-2.82888	0.0046711	0.0451308
Blood_0_Bl-04/Blood_0_control	Blood	Bl-04	0	Gimap6	994.585	-1.6797	0.490815	-3.42226	0.000621027	0.0165981
Blood_0_Bl-04/Blood_0_control	Blood	Bl-04	0	Gins1	30.8866	-1.84864	0.628494	-2.94139	0.00326746	0.037762
Blood_0_Bl-04/Blood_0_control	Blood	Bl-04	0	Gipc2	49.6586	2.48313	0.854475	2.90603	0.00366047	0.0395642
Blood_0_Bl-04/Blood_0_control	Blood	Bl-04	0	Git2	312.904	-1.14506	0.365294	-3.13463	0.0017207	0.0269394
Blood_0_Bl-04/Blood_0_control	Blood	Bl-04	0	Gja5	7.19787	4.44708	1.5749	2.82372	0.004747	0.0453565
Blood_0_Bl-04/Blood_0_control	Blood	Bl-04	0	Glo1	2416.16	2.22935	0.796332	2.79952	0.0051179	0.0470708
Blood_0_Bl-04/Blood_0_control	Blood	Bl-04	0	Glrx2	50.4427	2.70492	0.777698	3.47811	0.000504964	0.0151532
Blood_0_Bl-04/Blood_0_control	Blood	Bl-04	0	Gls	207.744	-2.10622	0.688746	-3.05806	0.00222777	0.0309356
Blood_0_Bl-04/Blood_0_control	Blood	Bl-04	0	Gm10250	14.8056	7.40826	1.98292	3.73603	0.000186948	0.00957135
Blood_0_Bl-04/Blood_0_control	Blood	Bl-04	0	Gm10334	106.215	22.0705	2.89796	7.6159	2.61859e-14	6.03945e-11
Blood_0_Bl-04/Blood_0_control	Blood	Bl-04	0	Gm10354	15.5627	5.29099	1.6531	3.20065	0.00137118	0.0241699
Blood_0_Bl-04/Blood_0_control	Blood	Bl-04	0	Gm10424	25.2621	6.05339	1.63221	3.70871	0.000208317	0.0100948
Blood_0_Bl-04/Blood_0_control	Blood	Bl-04	0	Gm12790	11.7668	6.28046	2.13873	2.93654	0.00331894	0.0379629
Blood_0_Bl-04/Blood_0_control	Blood	Bl-04	0	Gm13271	17.7956	4.9925	1.63616	3.05136	0.00227811	0.0312668
Blood_0_Bl-04/Blood_0_control	Blood	Bl-04	0	Gm13283	70.6442	4.25652	1.16984	3.63856	0.000274168	0.0113745
Blood_0_Bl-04/Blood_0_control	Blood	Bl-04	0	Gm13287	12.2963	3.92479	1.31496	2.98472	0.00283839	0.0349491
Blood_0_Bl-04/Blood_0_control	Blood	Bl-04	0	Gm14685	8.09953	7.46663	2.01471	3.70605	0.000210518	0.0101288
Blood_0_Bl-04/Blood_0_control	Blood	Bl-04	0	Gm15080	49.5011	6.6527	2.35649	2.82314	0.00475563	0.0453748
Blood_0_Bl-04/Blood_0_control	Blood	Bl-04	0	Gm15128	16.8187	6.36914	2.07192	3.07403	0.0021119	0.0299925
Blood_0_Bl-04/Blood_0_control	Blood	Bl-04	0	Gm15293	28.7898	3.40453	1.02453	3.32302	0.000890472	0.0197688
Blood_0_Bl-04/Blood_0_control	Blood	Bl-04	0	Gm16286	220.923	-1.81255	0.548064	-3.30718	0.000942407	0.0202565
Blood_0_Bl-04/Blood_0_control	Blood	Bl-04	0	Gm16451	19.7339	4.32245	1.54369	2.80008	0.00510897	0.0470206
Blood_0_Bl-04/Blood_0_control	Blood	Bl-04	0	Gm16506	27.8367	7.17629	1.84148	3.89702	9.73851e-05	0.00715569
Blood_0_Bl-04/Blood_0_control	Blood	Bl-04	0	Gm16519	200.323	-2.12565	0.732181	-2.90318	0.00369396	0.0397139
Blood_0_Bl-04/Blood_0_control	Blood	Bl-04	0	Gm16867	30828.6	3.75944	1.07754	3.4889	0.000485006	0.0149709
Blood_0_Bl-04/Blood_0_control	Blood	Bl-04	0	Gm17087	7.21445	5.42697	1.8363	2.95539	0.00312271	0.0367442
Blood_0_Bl-04/Blood_0_control	Blood	Bl-04	0	Gm17535	98632.6	4.47121	1.61114	2.77519	0.005517	0.0492017
Blood_0_Bl-04/Blood_0_control	Blood	Bl-04	0	Gm19402	14.3338	5.61364	1.71021	3.28244	0.00102914	0.0210854
Blood_0_Bl-04/Blood_0_control	Blood	Bl-04	0	Gm2000	794.121	2.03927	0.581932	3.50431	0.000457797	0.0144828
Blood_0_Bl-04/Blood_0_control	Blood	Bl-04	0	Gm2026	21.7674	-2.41401	0.84037	-2.87256	0.00407166	0.0419261
Blood_0_Bl-04/Blood_0_control	Blood	Bl-04	0	Gm20390	114.485	-3.36518	0.85962	-3.91473	9.05043e-05	0.00683585
Blood_0_Bl-04/Blood_0_control	Blood	Bl-04	0	Gm2042	8.82852	5.93731	2.07369	2.86316	0.0041944	0.0422989
Blood_0_Bl-04/Blood_0_control	Blood	Bl-04	0	Gm20489	515.877	-2.56243	0.777466	-3.29587	0.000981182	0.0207158
Blood_0_Bl-04/Blood_0_control	Blood	Bl-04	0	Gm20605	195.243	-2.33733	0.66757	-3.50126	0.000463066	0.0145879
Blood_0_Bl-04/Blood_0_control	Blood	Bl-04	0	Gm21149	22.1969	5.37905	1.84115	2.92157	0.00348272	0.0388181
Blood_0_Bl-04/Blood_0_control	Blood	Bl-04	0	Gm21190	48.1184	5.10868	1.71641	2.97637	0.00291678	0.035495
Blood_0_Bl-04/Blood_0_control	Blood	Bl-04	0	Gm28042	15.4686	-2.92451	0.998382	-2.92925	0.00339781	0.0382995
Blood_0_Bl-04/Blood_0_control	Blood	Bl-04	0	Gm28043	547.891	1.75154	0.603806	2.90084	0.00372164	0.0398074
Blood_0_Bl-04/Blood_0_control	Blood	Bl-04	0	Gm2854	136.051	4.03861	1.34915	2.99345	0.00275844	0.0344996
Blood_0_Bl-04/Blood_0_control	Blood	Bl-04	0	Gm29394	17.5277	-4.85866	1.44438	-3.36385	0.000768646	0.0180418
Blood_0_Bl-04/Blood_0_control	Blood	Bl-04	0	Gm2a	150.208	-1.61081	0.581211	-2.77148	0.00558028	0.0495373
Blood_0_Bl-04/Blood_0_control	Blood	Bl-04	0	Gm31371	7.55771	6.73535	2.31345	2.91138	0.00359833	0.0394241
Blood_0_Bl-04/Blood_0_control	Blood	Bl-04	0	Gm3150	315.738	-3.52531	1.21158	-2.90967	0.00361807	0.0394494
Blood_0_Bl-04/Blood_0_control	Blood	Bl-04	0	Gm3238	56.5406	4.547	1.28791	3.53052	0.000414747	0.0138556
Blood_0_Bl-04/Blood_0_control	Blood	Bl-04	0	Gm3542	10.226	6.97489	2.48915	2.80212	0.00507683	0.04688
Blood_0_Bl-04/Blood_0_control	Blood	Bl-04	0	Gm38394	81.015	-3.409	0.97094	-3.51103	0.000446377	0.014335
Blood_0_Bl-04/Blood_0_control	Blood	Bl-04	0	Gm39115	13.7264	5.80912	1.79045	3.2445	0.00117655	0.0223727
Blood_0_Bl-04/Blood_0_control	Blood	Bl-04	0	Gm43218	71.1643	-2.75287	0.853371	-3.22587	0.0012559	0.023039
Blood_0_Bl-04/Blood_0_control	Blood	Bl-04	0	Gm4513	45.8354	5.07917	1.67472	3.03285	0.00242255	0.0323206
Blood_0_Bl-04/Blood_0_control	Blood	Bl-04	0	Gm4559	10.3886	6.09868	1.93536	3.15119	0.00162605	0.0263623
Blood_0_Bl-04/Blood_0_control	Blood	Bl-04	0	Gm49321	116.669	-2.95517	0.777965	-3.79858	0.000145525	0.00853901
Blood_0_Bl-04/Blood_0_control	Blood	Bl-04	0	Gm49368	515.907	-3.54951	0.971779	-3.65259	0.000259611	0.0111427
Blood_0_Bl-04/Blood_0_control	Blood	Bl-04	0	Gm5148	34.012	3.68991	1.1887	3.10415	0.00190823	0.0283198
Blood_0_Bl-04/Blood_0_control	Blood	Bl-04	0	Gm5152	29.1849	4.97659	1.79496	2.77254	0.0055621	0.0494734
Blood_0_Bl-04/Blood_0_control	Blood	Bl-04	0	Gm5426	175.888	2.61521	0.862003	3.03387	0.00241435	0.0323189
Blood_0_Bl-04/Blood_0_control	Blood	Bl-04	0	Gm5431	133.737	-2.75555	0.985591	-2.79584	0.00517657	0.0474168
Blood_0_Bl-04/Blood_0_control	Blood	Bl-04	0	Gm5773	18.5379	8.2965	2.31471	3.58425	0.000338047	0.012556
Blood_0_Bl-04/Blood_0_control	Blood	Bl-04	0	Gm5814	66.1729	4.11004	1.1332	3.62694	0.000286799	0.0115489
Blood_0_Bl-04/Blood_0_control	Blood	Bl-04	0	Gm5891	30.8741	5.06606	1.72663	2.93408	0.00334537	0.038104
Blood_0_Bl-04/Blood_0_control	Blood	Bl-04	0	Gm6563	51.5725	-1.40683	0.502169	-2.8015	0.00508661	0.04688
Blood_0_Bl-04/Blood_0_control	Blood	Bl-04	0	Gm6763	24.0061	4.5023	1.58595	2.83887	0.00452734	0.0444303
Blood_0_Bl-04/Blood_0_control	Blood	Bl-04	0	Gm6793	6.7172	4.54029	1.60706	2.82521	0.00472492	0.0453565
Blood_0_Bl-04/Blood_0_control	Blood	Bl-04	0	Gm7138	14.8269	4.42084	1.47257	3.00212	0.00268106	0.0339798
Blood_0_Bl-04/Blood_0_control	Blood	Bl-04	0	Gm7942	17.5057	5.76653	1.79839	3.2065	0.0013436	0.0238328
Blood_0_Bl-04/Blood_0_control	Blood	Bl-04	0	Gm8220	10.7298	7.44812	2.42854	3.06691	0.00216285	0.0303324
Blood_0_Bl-04/Blood_0_control	Blood	Bl-04	0	Gm8225	26.7251	6.36408	1.55997	4.07963	4.51075e-05	0.00525736
Blood_0_Bl-04/Blood_0_control	Blood	Bl-04	0	Gm8232	34.3399	4.57428	1.56819	2.91692	0.00353506	0.0391706
Blood_0_Bl-04/Blood_0_control	Blood	Bl-04	0	Gm8237	7.53818	4.8534	1.71633	2.82777	0.0046873	0.0452014
Blood_0_Bl-04/Blood_0_control	Blood	Bl-04	0	Gm8265	11.8166	6.01411	2.02975	2.96299	0.00304671	0.0362602
Blood_0_Bl-04/Blood_0_control	Blood	Bl-04	0	Gm8797	4043.68	1.41896	0.488542	2.90448	0.00367866	0.0396299
Blood_0_Bl-04/Blood_0_control	Blood	Bl-04	0	Gm9242	4903.69	3.77085	1.16856	3.22693	0.00125125	0.023039
Blood_0_Bl-04/Blood_0_control	Blood	Bl-04	0	Gm9507	20.0222	5.22133	1.34068	3.89455	9.83806e-05	0.00717245
Blood_0_Bl-04/Blood_0_control	Blood	Bl-04	0	Gm9602	13.2903	7.67477	2.39912	3.199	0.00137906	0.0242215
Blood_0_Bl-04/Blood_0_control	Blood	Bl-04	0	Gmppb	25.387	3.08546	0.967683	3.1885	0.00143014	0.0245999
Blood_0_Bl-04/Blood_0_control	Blood	Bl-04	0	Gmpr	206.813	2.00846	0.639413	3.1411	0.00168316	0.0267746
Blood_0_Bl-04/Blood_0_control	Blood	Bl-04	0	Gnai3	57.6037	2.692	0.838322	3.21118	0.0013219	0.0237345
Blood_0_Bl-04/Blood_0_control	Blood	Bl-04	0	Gngt2	38.5914	-5.10111	1.50531	-3.38874	0.000702145	0.0173996
Blood_0_Bl-04/Blood_0_control	Blood	Bl-04	0	Gnl3l	58.9126	-3.14475	0.853147	-3.68606	0.000227751	0.0104047
Blood_0_Bl-04/Blood_0_control	Blood	Bl-04	0	Golga3	54.6208	-1.83264	0.498751	-3.67446	0.000238349	0.0106657
Blood_0_Bl-04/Blood_0_control	Blood	Bl-04	0	Gosr2	35.2691	-3.01891	0.994652	-3.03514	0.0024042	0.0323109
Blood_0_Bl-04/Blood_0_control	Blood	Bl-04	0	Gp1bb	1029.55	2.31803	0.74931	3.09356	0.00197774	0.0288374
Blood_0_Bl-04/Blood_0_control	Blood	Bl-04	0	Gp2	86.1768	14.2148	2.83148	5.02028	5.15952e-07	0.000317076
Blood_0_Bl-04/Blood_0_control	Blood	Bl-04	0	Gpi1	429.38	-1.25235	0.423006	-2.9606	0.00307037	0.0364308
Blood_0_Bl-04/Blood_0_control	Blood	Bl-04	0	Gpr160	9.41525	-4.43309	1.56833	-2.82662	0.00470414	0.0453314
Blood_0_Bl-04/Blood_0_control	Blood	Bl-04	0	Gpx1	9053.27	1.74899	0.50769	3.445	0.000571058	0.0159271
Blood_0_Bl-04/Blood_0_control	Blood	Bl-04	0	Grap2	3239.98	4.84368	1.27822	3.78939	0.000151019	0.00865159
Blood_0_Bl-04/Blood_0_control	Blood	Bl-04	0	Gria2	18.4718	6.22521	1.80516	3.44856	0.000563588	0.0158085
Blood_0_Bl-04/Blood_0_control	Blood	Bl-04	0	Grina	459.552	2.32786	0.794518	2.92991	0.00339066	0.0382749
Blood_0_Bl-04/Blood_0_control	Blood	Bl-04	0	Grn	529.363	-2.03692	0.719203	-2.83219	0.00462309	0.0448519
Blood_0_Bl-04/Blood_0_control	Blood	Bl-04	0	Gtf3a	98.8085	-1.71325	0.602712	-2.84257	0.0044751	0.0440345
Blood_0_Bl-04/Blood_0_control	Blood	Bl-04	0	Gtf3c5	45.8549	1.95801	0.680497	2.87732	0.00401071	0.0415197
Blood_0_Bl-04/Blood_0_control	Blood	Bl-04	0	Gtpbp1	11.6925	-2.90019	1.01506	-2.85716	0.00427447	0.0426815
Blood_0_Bl-04/Blood_0_control	Blood	Bl-04	0	Gucy1b1	733.094	1.88386	0.639859	2.94418	0.00323808	0.0376107
Blood_0_Bl-04/Blood_0_control	Blood	Bl-04	0	Guf1	23.5886	-4.64123	1.40236	-3.30958	0.000934366	0.0201756
Blood_0_Bl-04/Blood_0_control	Blood	Bl-04	0	Gusb	85.3677	-2.76095	0.742866	-3.71662	0.000201908	0.00992652
Blood_0_Bl-04/Blood_0_control	Blood	Bl-04	0	H2-Aa	359.351	-2.33995	0.762794	-3.0676	0.00215786	0.0302952
Blood_0_Bl-04/Blood_0_control	Blood	Bl-04	0	H2-DMa	121.453	-2.34155	0.739129	-3.16799	0.00153499	0.0254327
Blood_0_Bl-04/Blood_0_control	Blood	Bl-04	0	H2-T-ps	340.934	1.55153	0.556957	2.78573	0.0053408	0.0483142
Blood_0_Bl-04/Blood_0_control	Blood	Bl-04	0	H2-T23	4476.26	1.62669	0.567139	2.86824	0.00412766	0.0420226
Blood_0_Bl-04/Blood_0_control	Blood	Bl-04	0	H2afj	13.1767	3.51368	1.21789	2.88504	0.0039136	0.0410487
Blood_0_Bl-04/Blood_0_control	Blood	Bl-04	0	Hadhb	456.84	2.30729	0.718869	3.20961	0.00132917	0.0238018
Blood_0_Bl-04/Blood_0_control	Blood	Bl-04	0	Hagh	18112.5	2.5103	0.605464	4.14608	3.3822e-05	0.00452747
Blood_0_Bl-04/Blood_0_control	Blood	Bl-04	0	Haus5	5.90447	-4.52811	1.44543	-3.13271	0.00173201	0.0270184
Blood_0_Bl-04/Blood_0_control	Blood	Bl-04	0	Hba-a2	147517	4.94843	1.0311	4.79915	1.59337e-06	0.000769372
Blood_0_Bl-04/Blood_0_control	Blood	Bl-04	0	Hbb-bs	5164.4	3.48226	0.655433	5.31291	1.07887e-07	0.000112202
Blood_0_Bl-04/Blood_0_control	Blood	Bl-04	0	Hbb-bt	49102.6	2.81261	1.00164	2.808	0.004985	0.0466417
Blood_0_Bl-04/Blood_0_control	Blood	Bl-04	0	Hbp1	67.6373	-3.82528	1.09136	-3.50504	0.000456531	0.0144828
Blood_0_Bl-04/Blood_0_control	Blood	Bl-04	0	Hcfc2	52.7943	-2.153	0.629622	-3.41951	0.00062734	0.0165981
Blood_0_Bl-04/Blood_0_control	Blood	Bl-04	0	Hdac2	84.9856	-3.01798	0.699842	-4.31238	1.61509e-05	0.00322873
Blood_0_Bl-04/Blood_0_control	Blood	Bl-04	0	Hdac8	49.6793	-2.92348	0.864695	-3.38094	0.000722387	0.0175976
Blood_0_Bl-04/Blood_0_control	Blood	Bl-04	0	Hdgfl2	43.9288	-2.16685	0.698826	-3.1007	0.00193062	0.0285579
Blood_0_Bl-04/Blood_0_control	Blood	Bl-04	0	Hdhd5	32.6879	-3.67355	1.10717	-3.31796	0.000906772	0.0199029
Blood_0_Bl-04/Blood_0_control	Blood	Bl-04	0	Heatr1	158.231	-1.4454	0.50587	-2.85725	0.00427322	0.0426815
Blood_0_Bl-04/Blood_0_control	Blood	Bl-04	0	Hepacam2	17.8045	-6.66568	1.56938	-4.24733	2.16335e-05	0.00351923
Blood_0_Bl-04/Blood_0_control	Blood	Bl-04	0	Hexb	82.2776	-2.88181	0.771199	-3.7368	0.000186379	0.00957135
Blood_0_Bl-04/Blood_0_control	Blood	Bl-04	0	Hic1	8.76918	5.57104	1.83248	3.04016	0.00236452	0.0319714
Blood_0_Bl-04/Blood_0_control	Blood	Bl-04	0	Hif1a	485.377	-1.95747	0.670928	-2.91755	0.00352793	0.0391285
Blood_0_Bl-04/Blood_0_control	Blood	Bl-04	0	Hist1h1b	186.667	2.80163	0.869093	3.22363	0.00126578	0.0231574
Blood_0_Bl-04/Blood_0_control	Blood	Bl-04	0	Hist1h2ao	71.3754	4.37787	1.10026	3.97896	6.92188e-05	0.0060145
Blood_0_Bl-04/Blood_0_control	Blood	Bl-04	0	Hist2h2aa1	518.734	1.56084	0.417916	3.73483	0.000187844	0.00957135
Blood_0_Bl-04/Blood_0_control	Blood	Bl-04	0	Hist2h2ac	505.135	2.972	0.849188	3.49982	0.000465578	0.0146047
Blood_0_Bl-04/Blood_0_control	Blood	Bl-04	0	Hist2h3c2	365.591	2.63698	0.929686	2.83642	0.00456229	0.0446325
Blood_0_Bl-04/Blood_0_control	Blood	Bl-04	0	Hist3h2a	20.9238	2.6887	0.941574	2.85554	0.00429634	0.0428051
Blood_0_Bl-04/Blood_0_control	Blood	Bl-04	0	Hivep1	231.123	1.93889	0.607291	3.19268	0.00140959	0.0244958
Blood_0_Bl-04/Blood_0_control	Blood	Bl-04	0	Hk1	523.362	1.8615	0.649818	2.86464	0.0041748	0.0422164
Blood_0_Bl-04/Blood_0_control	Blood	Bl-04	0	Hltf	154.776	-1.8188	0.449939	-4.04233	5.29237e-05	0.00550354
Blood_0_Bl-04/Blood_0_control	Blood	Bl-04	0	Hmgcr	94.758	-2.06479	0.734271	-2.81202	0.00492309	0.0463189
Blood_0_Bl-04/Blood_0_control	Blood	Bl-04	0	Hmox2	134.229	-2.13409	0.711528	-2.99931	0.00270596	0.0340956
Blood_0_Bl-04/Blood_0_control	Blood	Bl-04	0	Hnrnpa1	396.72	-1.66911	0.451095	-3.70012	0.000215498	0.0101872
Blood_0_Bl-04/Blood_0_control	Blood	Bl-04	0	Hnrnpf	691.235	-1.20054	0.361032	-3.32529	0.000883264	0.0196734
Blood_0_Bl-04/Blood_0_control	Blood	Bl-04	0	Hnrnpk	296.263	-1.59597	0.574025	-2.78031	0.00543072	0.0488187
Blood_0_Bl-04/Blood_0_control	Blood	Bl-04	0	Hnrnpu	589.734	2.27545	0.540532	4.20965	2.55764e-05	0.00384214
Blood_0_Bl-04/Blood_0_control	Blood	Bl-04	0	Hnrnpul2	4621.26	3.35015	1.06718	3.13925	0.00169381	0.0267952
Blood_0_Bl-04/Blood_0_control	Blood	Bl-04	0	Hps3	88.309	-5.07804	1.12354	-4.51969	6.19297e-06	0.00190293
Blood_0_Bl-04/Blood_0_control	Blood	Bl-04	0	Hps5	99.0324	-2.78697	0.627843	-4.43896	9.03943e-06	0.00235025
Blood_0_Bl-04/Blood_0_control	Blood	Bl-04	0	Hrnr	45.133	5.08666	1.6589	3.06628	0.00216742	0.0303349
Blood_0_Bl-04/Blood_0_control	Blood	Bl-04	0	Hs1bp3	29.8829	-2.58084	0.885511	-2.91452	0.00356231	0.0392864
Blood_0_Bl-04/Blood_0_control	Blood	Bl-04	0	Hsd17b10	51.7113	4.24529	1.22588	3.46306	0.000534069	0.0154641
Blood_0_Bl-04/Blood_0_control	Blood	Bl-04	0	Hsd17b12	135.266	-2.32843	0.827165	-2.81496	0.00487835	0.0460261
Blood_0_Bl-04/Blood_0_control	Blood	Bl-04	0	Hspa4l	282.139	2.38549	0.646188	3.69164	0.000222814	0.0103166
Blood_0_Bl-04/Blood_0_control	Blood	Bl-04	0	Hspa5	4904.62	2.47166	0.808629	3.05661	0.00223858	0.0309799
Blood_0_Bl-04/Blood_0_control	Blood	Bl-04	0	Hspbap1	38.283	-5.39847	1.47308	-3.66475	0.000247583	0.0107978
Blood_0_Bl-04/Blood_0_control	Blood	Bl-04	0	Htatip2	126.886	3.19061	0.85443	3.7342	0.000188312	0.00957135
Blood_0_Bl-04/Blood_0_control	Blood	Bl-04	0	Iah1	5.57784	3.6214	1.24365	2.91191	0.00359229	0.0393899
Blood_0_Bl-04/Blood_0_control	Blood	Bl-04	0	Iars	137.714	-1.0385	0.345249	-3.00799	0.00262984	0.0337723
Blood_0_Bl-04/Blood_0_control	Blood	Bl-04	0	Ibtk	3651.9	4.97836	1.3108	3.79795	0.000145896	0.00853901
Blood_0_Bl-04/Blood_0_control	Blood	Bl-04	0	Icam1	16.31	-3.32246	1.19613	-2.77767	0.00547499	0.0489553
Blood_0_Bl-04/Blood_0_control	Blood	Bl-04	0	Idh3b	51.345	-1.94765	0.682291	-2.85457	0.00430945	0.0428725
Blood_0_Bl-04/Blood_0_control	Blood	Bl-04	0	Idh3g	195.798	-1.7861	0.527176	-3.38805	0.000703903	0.0173996
Blood_0_Bl-04/Blood_0_control	Blood	Bl-04	0	Iffo1	7.8538	-3.13708	1.12444	-2.7899	0.00527248	0.0479703
Blood_0_Bl-04/Blood_0_control	Blood	Bl-04	0	Ifi27l2b	50.2201	3.02177	0.892215	3.38682	0.000707067	0.0174127
Blood_0_Bl-04/Blood_0_control	Blood	Bl-04	0	Ifitm7	13.2649	5.65877	1.88613	3.0002	0.00269806	0.0340278
Blood_0_Bl-04/Blood_0_control	Blood	Bl-04	0	Ifna12	6.38981	6.46276	1.97469	3.27281	0.00106486	0.0214266
Blood_0_Bl-04/Blood_0_control	Blood	Bl-04	0	Ifnar1	99.6734	1.62506	0.521172	3.11809	0.00182027	0.0275414
Blood_0_Bl-04/Blood_0_control	Blood	Bl-04	0	Ifrd2	936.776	1.84224	0.582811	3.16095	0.00157254	0.0258019
Blood_0_Bl-04/Blood_0_control	Blood	Bl-04	0	Ift22	4.39514	3.95069	1.3511	2.92407	0.00345491	0.0386036
Blood_0_Bl-04/Blood_0_control	Blood	Bl-04	0	Ighd	73.9154	-2.60054	0.796099	-3.26661	0.00108844	0.0214722
Blood_0_Bl-04/Blood_0_control	Blood	Bl-04	0	Ighmbp2	7.00935	-4.29126	1.39935	-3.06661	0.002165	0.0303324
Blood_0_Bl-04/Blood_0_control	Blood	Bl-04	0	Ighv11-2	43.7423	-4.86762	1.41544	-3.43894	0.000583988	0.0160515
Blood_0_Bl-04/Blood_0_control	Blood	Bl-04	0	Ighv7-3	35.0222	-3.00395	1.06622	-2.81738	0.00484167	0.0458079
Blood_0_Bl-04/Blood_0_control	Blood	Bl-04	0	Igkv12-41	18.1512	-3.40538	1.21368	-2.80584	0.0050185	0.0466644
Blood_0_Bl-04/Blood_0_control	Blood	Bl-04	0	Igkv14-126	77.1564	-4.77802	1.28742	-3.7113	0.000206195	0.0100948
Blood_0_Bl-04/Blood_0_control	Blood	Bl-04	0	Igkv5-39	73.2396	-2.96469	0.758684	-3.90767	9.31892e-05	0.00696087
Blood_0_Bl-04/Blood_0_control	Blood	Bl-04	0	Igkv6-25	23.9683	-4.38692	1.18555	-3.70031	0.000215334	0.0101872
Blood_0_Bl-04/Blood_0_control	Blood	Bl-04	0	Igkv8-19	45.8391	-2.77479	0.781558	-3.55033	0.000384743	0.013372
Blood_0_Bl-04/Blood_0_control	Blood	Bl-04	0	Igkv8-21	51.0936	-2.89079	0.804319	-3.59409	0.00032553	0.012404
Blood_0_Bl-04/Blood_0_control	Blood	Bl-04	0	Igkv8-28	77.8534	-2.18355	0.703055	-3.1058	0.00189768	0.0282605
Blood_0_Bl-04/Blood_0_control	Blood	Bl-04	0	Igkv8-30	122.114	-2.79678	0.884694	-3.16129	0.00157071	0.0258019
Blood_0_Bl-04/Blood_0_control	Blood	Bl-04	0	Iglc3	279.639	-2.8325	0.90351	-3.13499	0.00171859	0.0269394
Blood_0_Bl-04/Blood_0_control	Blood	Bl-04	0	Iglv1	27.8627	-3.39805	1.00855	-3.36926	0.000753711	0.0179089
Blood_0_Bl-04/Blood_0_control	Blood	Bl-04	0	Iglv2	26.0701	-3.40405	1.20136	-2.83349	0.0046043	0.0447676
Blood_0_Bl-04/Blood_0_control	Blood	Bl-04	0	Ik	117.738	1.81709	0.600174	3.0276	0.00246505	0.0325403
Blood_0_Bl-04/Blood_0_control	Blood	Bl-04	0	Ikbkg	819.67	3.00168	0.73645	4.07588	4.58403e-05	0.00526241
Blood_0_Bl-04/Blood_0_control	Blood	Bl-04	0	Ikzf5	106.021	-2.03809	0.625326	-3.25925	0.00111709	0.021736
Blood_0_Bl-04/Blood_0_control	Blood	Bl-04	0	Il18	30.1398	-3.43986	1.07789	-3.19129	0.00141637	0.0245513
Blood_0_Bl-04/Blood_0_control	Blood	Bl-04	0	Il27ra	46.4084	-3.97637	1.18182	-3.3646	0.000766542	0.0180376
Blood_0_Bl-04/Blood_0_control	Blood	Bl-04	0	Il2rg	108.366	-3.08079	0.857685	-3.59199	0.000328168	0.012444
Blood_0_Bl-04/Blood_0_control	Blood	Bl-04	0	Il5ra	35.0951	-4.79756	1.18593	-4.04541	5.22315e-05	0.00547418
Blood_0_Bl-04/Blood_0_control	Blood	Bl-04	0	Ino80	74.6045	1.4048	0.410696	3.42053	0.000624985	0.0165981
Blood_0_Bl-04/Blood_0_control	Blood	Bl-04	0	Ino80b	133.846	1.45278	0.515471	2.81835	0.00482705	0.0457015
Blood_0_Bl-04/Blood_0_control	Blood	Bl-04	0	Insl6	11.3713	3.2813	1.06068	3.09356	0.00197768	0.0288374
Blood_0_Bl-04/Blood_0_control	Blood	Bl-04	0	Ints10	57.2452	-2.09079	0.616418	-3.39185	0.000694233	0.0173996
Blood_0_Bl-04/Blood_0_control	Blood	Bl-04	0	Ints11	73.5279	-1.49382	0.422947	-3.53192	0.000412547	0.0138556
Blood_0_Bl-04/Blood_0_control	Blood	Bl-04	0	Ints3	35.2165	-2.14477	0.623827	-3.43808	0.000585848	0.0160515
Blood_0_Bl-04/Blood_0_control	Blood	Bl-04	0	Ints6	58.9577	-2.57108	0.714595	-3.59796	0.000320726	0.012331
Blood_0_Bl-04/Blood_0_control	Blood	Bl-04	0	Ints8	155	-1.93193	0.511503	-3.77697	0.000158748	0.00878297
Blood_0_Bl-04/Blood_0_control	Blood	Bl-04	0	Ipo9	121.125	-1.31425	0.401058	-3.27697	0.00104928	0.0211735
Blood_0_Bl-04/Blood_0_control	Blood	Bl-04	0	Ipp	47.8025	-2.03019	0.629619	-3.22447	0.00126207	0.0231208
Blood_0_Bl-04/Blood_0_control	Blood	Bl-04	0	Irf4	31.3253	-2.36847	0.838155	-2.82581	0.00471613	0.0453565
Blood_0_Bl-04/Blood_0_control	Blood	Bl-04	0	Irx1	10.0613	3.85731	1.31639	2.93021	0.00338734	0.0382749
Blood_0_Bl-04/Blood_0_control	Blood	Bl-04	0	Isg20l2	51.4412	-1.36318	0.46352	-2.94092	0.00327237	0.0377817
Blood_0_Bl-04/Blood_0_control	Blood	Bl-04	0	Isoc1	128.243	-2.68284	0.842624	-3.18391	0.001453	0.0248447
Blood_0_Bl-04/Blood_0_control	Blood	Bl-04	0	Itgb7	262.904	-2.03251	0.721682	-2.81635	0.00485732	0.0458917
Blood_0_Bl-04/Blood_0_control	Blood	Bl-04	0	Itpa	27.4814	-1.63853	0.518519	-3.16002	0.0015776	0.0258536
Blood_0_Bl-04/Blood_0_control	Blood	Bl-04	0	Itpkb	162.288	-2.36043	0.721883	-3.26983	0.00107613	0.0214266
Blood_0_Bl-04/Blood_0_control	Blood	Bl-04	0	Itpr3	28.7667	-2.67949	0.945625	-2.83356	0.00460322	0.0447676
Blood_0_Bl-04/Blood_0_control	Blood	Bl-04	0	Iws1	160.403	-1.10104	0.361971	-3.04179	0.00235173	0.031891
Blood_0_Bl-04/Blood_0_control	Blood	Bl-04	0	Jmjd6	217.515	-1.48432	0.372238	-3.98754	6.67614e-05	0.0059706
Blood_0_Bl-04/Blood_0_control	Blood	Bl-04	0	Jmjd8	328.731	3.29182	1.00693	3.26918	0.00107859	0.0214266
Blood_0_Bl-04/Blood_0_control	Blood	Bl-04	0	Jpt2	142.961	-2.37454	0.761637	-3.11768	0.00182283	0.0275414
Blood_0_Bl-04/Blood_0_control	Blood	Bl-04	0	Jsrp1	16.2949	6.09736	1.68878	3.61051	0.000305591	0.0119829
Blood_0_Bl-04/Blood_0_control	Blood	Bl-04	0	Jtb	135.498	-1.73815	0.615405	-2.8244	0.00473691	0.0453565
Blood_0_Bl-04/Blood_0_control	Blood	Bl-04	0	Junb	167.668	-1.79229	0.591518	-3.02998	0.0024457	0.0324968
Blood_0_Bl-04/Blood_0_control	Blood	Bl-04	0	Kalrn	153.802	2.56234	0.662096	3.87004	0.000108818	0.00746812
Blood_0_Bl-04/Blood_0_control	Blood	Bl-04	0	Kansl3	42.4669	-2.5867	0.848176	-3.04972	0.00229059	0.0312815
Blood_0_Bl-04/Blood_0_control	Blood	Bl-04	0	Kars	213.979	-1.33517	0.380355	-3.51032	0.000447562	0.014339
Blood_0_Bl-04/Blood_0_control	Blood	Bl-04	0	Kat2a	95.6823	-2.10535	0.759553	-2.77182	0.00557434	0.0495171
Blood_0_Bl-04/Blood_0_control	Blood	Bl-04	0	Kat6a	164.344	-2.53439	0.840163	-3.01655	0.00255671	0.0332372
Blood_0_Bl-04/Blood_0_control	Blood	Bl-04	0	Kat7	98.0973	-2.5712	0.834681	-3.08046	0.00206682	0.0295931
Blood_0_Bl-04/Blood_0_control	Blood	Bl-04	0	Kat8	333.364	0.950743	0.280973	3.38376	0.000715014	0.0175418
Blood_0_Bl-04/Blood_0_control	Blood	Bl-04	0	Kcmf1	162.003	2.06248	0.497131	4.14877	3.34273e-05	0.00452747
Blood_0_Bl-04/Blood_0_control	Blood	Bl-04	0	Kcng1	7.95027	5.91925	1.68124	3.52076	0.000430314	0.0140189
Blood_0_Bl-04/Blood_0_control	Blood	Bl-04	0	Kcng2	52.8916	4.14685	1.14207	3.63098	0.000282352	0.0114815
Blood_0_Bl-04/Blood_0_control	Blood	Bl-04	0	Kdm5c	125.659	1.16745	0.393044	2.97028	0.00297529	0.0357564
Blood_0_Bl-04/Blood_0_control	Blood	Bl-04	0	Kdm7a	22.581	4.0636	1.03494	3.92641	8.62238e-05	0.00668211
Blood_0_Bl-04/Blood_0_control	Blood	Bl-04	0	Khdrbs1	222.131	-2.64178	0.65641	-4.02459	5.70744e-05	0.00567386
Blood_0_Bl-04/Blood_0_control	Blood	Bl-04	0	Kif14	51.3065	4.06603	1.1205	3.62876	0.00028479	0.011528
Blood_0_Bl-04/Blood_0_control	Blood	Bl-04	0	Klf1	7.0618	3.26418	1.13628	2.87269	0.00406997	0.0419261
Blood_0_Bl-04/Blood_0_control	Blood	Bl-04	0	Klhdc1	16.2827	-2.28272	0.74001	-3.08471	0.00203748	0.0294072
Blood_0_Bl-04/Blood_0_control	Blood	Bl-04	0	Klhdc10	97.7153	1.32389	0.417586	3.17035	0.00152255	0.0254304
Blood_0_Bl-04/Blood_0_control	Blood	Bl-04	0	Klhl20	137.507	2.87844	0.777931	3.70012	0.000215496	0.0101872
Blood_0_Bl-04/Blood_0_control	Blood	Bl-04	0	Klra2	46.8211	-5.33107	1.84387	-2.89124	0.00383724	0.0404656
Blood_0_Bl-04/Blood_0_control	Blood	Bl-04	0	Kmt2a	44.2829	-1.9095	0.577963	-3.30384	0.000953699	0.0204019
Blood_0_Bl-04/Blood_0_control	Blood	Bl-04	0	Kntc1	108.214	2.12816	0.727429	2.92559	0.00343799	0.0384781
Blood_0_Bl-04/Blood_0_control	Blood	Bl-04	0	Kpnb1	123.319	-2.19715	0.688852	-3.18959	0.00142477	0.0245513
Blood_0_Bl-04/Blood_0_control	Blood	Bl-04	0	Krt16	4.85313	5.89313	2.03499	2.8959	0.00378079	0.0400466
Blood_0_Bl-04/Blood_0_control	Blood	Bl-04	0	Krtdap	4.03608	6.76497	2.31807	2.91836	0.0035188	0.0391234
Blood_0_Bl-04/Blood_0_control	Blood	Bl-04	0	Lacc1	21.9112	-4.84651	1.43918	-3.36754	0.00075842	0.0179892
Blood_0_Bl-04/Blood_0_control	Blood	Bl-04	0	Larp4	71.128	-1.68854	0.453622	-3.72236	0.000197373	0.00977465
Blood_0_Bl-04/Blood_0_control	Blood	Bl-04	0	Lat2	81.7711	3.74143	1.24987	2.99345	0.00275838	0.0344996
Blood_0_Bl-04/Blood_0_control	Blood	Bl-04	0	Ldah	30.9419	-2.6635	0.810475	-3.28635	0.00101496	0.0208769
Blood_0_Bl-04/Blood_0_control	Blood	Bl-04	0	Ldha	241.423	-2.19455	0.678551	-3.23416	0.00121999	0.0227507
Blood_0_Bl-04/Blood_0_control	Blood	Bl-04	0	Letm1	70.1198	2.85777	0.9723	2.93918	0.0032908	0.0378382
Blood_0_Bl-04/Blood_0_control	Blood	Bl-04	0	Lgals1	52.595	-4.43775	1.156	-3.83889	0.000123594	0.00803043
Blood_0_Bl-04/Blood_0_control	Blood	Bl-04	0	Lig4	19.4574	-2.56047	0.813436	-3.14772	0.00164548	0.0264761
Blood_0_Bl-04/Blood_0_control	Blood	Bl-04	0	Limk2	41.4764	-2.97155	0.911748	-3.25918	0.00111735	0.021736
Blood_0_Bl-04/Blood_0_control	Blood	Bl-04	0	Lipa	85.9525	-4.69624	1.24015	-3.78684	0.000152577	0.00870399
Blood_0_Bl-04/Blood_0_control	Blood	Bl-04	0	Llgl2	26.014	2.64023	0.820762	3.21681	0.00129625	0.0234609
Blood_0_Bl-04/Blood_0_control	Blood	Bl-04	0	Lmbrd1	271.528	-1.01714	0.311402	-3.26633	0.00108949	0.0214722
Blood_0_Bl-04/Blood_0_control	Blood	Bl-04	0	Lmna	664.132	2.58519	0.813421	3.17817	0.00148208	0.0249846
Blood_0_Bl-04/Blood_0_control	Blood	Bl-04	0	Lpgat1	1458.92	2.19367	0.780956	2.80896	0.00497019	0.0465898
Blood_0_Bl-04/Blood_0_control	Blood	Bl-04	0	Lrba	86.9029	-3.39698	1.04636	-3.24648	0.00116843	0.0222651
Blood_0_Bl-04/Blood_0_control	Blood	Bl-04	0	Lrch1	97.144	-1.52031	0.439998	-3.45527	0.000549738	0.0155773
Blood_0_Bl-04/Blood_0_control	Blood	Bl-04	0	Lrch4	34.38	3.17189	0.80796	3.9258	8.64416e-05	0.00668211
Blood_0_Bl-04/Blood_0_control	Blood	Bl-04	0	Lrguk	6.54135	7.68016	2.03169	3.78019	0.000156712	0.00878297
Blood_0_Bl-04/Blood_0_control	Blood	Bl-04	0	Lrif1	29.4879	-5.57719	1.68244	-3.31495	0.000916606	0.0200202
Blood_0_Bl-04/Blood_0_control	Blood	Bl-04	0	Lrmda	51.5314	-2.10427	0.696848	-3.0197	0.00253027	0.0330525
Blood_0_Bl-04/Blood_0_control	Blood	Bl-04	0	Lrpprc	57.2194	-4.35225	1.33895	-3.25049	0.00115206	0.0220639
Blood_0_Bl-04/Blood_0_control	Blood	Bl-04	0	Lrrc29	163.368	2.37259	0.816135	2.90711	0.00364786	0.0395475
Blood_0_Bl-04/Blood_0_control	Blood	Bl-04	0	Lrrc59	987.456	3.87152	1.2855	3.01169	0.00259794	0.0336116
Blood_0_Bl-04/Blood_0_control	Blood	Bl-04	0	Lrrc8b	123.338	2.60373	0.655098	3.97457	7.05053e-05	0.00603474
Blood_0_Bl-04/Blood_0_control	Blood	Bl-04	0	Lrrc8c	106.88	1.7961	0.615824	2.91658	0.00353891	0.0391706
Blood_0_Bl-04/Blood_0_control	Blood	Bl-04	0	Lrrcc1	55.0796	-4.31582	0.975504	-4.42419	9.68027e-06	0.00246938
Blood_0_Bl-04/Blood_0_control	Blood	Bl-04	0	Lsamp	110.791	3.87305	1.33619	2.89857	0.00374864	0.0399383
Blood_0_Bl-04/Blood_0_control	Blood	Bl-04	0	Lsm1	360.798	1.55603	0.432508	3.5977	0.000321044	0.012331
Blood_0_Bl-04/Blood_0_control	Blood	Bl-04	0	Lsm4	44.9405	-1.54578	0.51512	-3.00082	0.00269255	0.0340278
Blood_0_Bl-04/Blood_0_control	Blood	Bl-04	0	Lss	24.7833	-3.25888	1.03544	-3.14734	0.00164762	0.0264761
Blood_0_Bl-04/Blood_0_control	Blood	Bl-04	0	Lta4h	72.7354	-2.02162	0.55503	-3.64237	0.000270142	0.0113426
Blood_0_Bl-04/Blood_0_control	Blood	Bl-04	0	Ltv1	36.9022	-2.44362	0.77915	-3.13627	0.00171114	0.026932
Blood_0_Bl-04/Blood_0_control	Blood	Bl-04	0	Luc7l	1024.43	2.07526	0.61766	3.35988	0.00077976	0.0181358
Blood_0_Bl-04/Blood_0_control	Blood	Bl-04	0	Ly6e	247.789	-1.84392	0.656826	-2.80732	0.00499558	0.0466457
Blood_0_Bl-04/Blood_0_control	Blood	Bl-04	0	Ly86	192.751	-1.80224	0.637802	-2.82571	0.00471764	0.0453565
Blood_0_Bl-04/Blood_0_control	Blood	Bl-04	0	Ly9	119.329	-2.72255	0.875365	-3.11019	0.00186969	0.0280247
Blood_0_Bl-04/Blood_0_control	Blood	Bl-04	0	Lysmd2	17.2352	-2.51065	0.849005	-2.95717	0.00310479	0.036661
Blood_0_Bl-04/Blood_0_control	Blood	Bl-04	0	Lzic	54.3043	-1.83541	0.567994	-3.23138	0.00123192	0.0228203
Blood_0_Bl-04/Blood_0_control	Blood	Bl-04	0	Maco1	107.105	-1.46219	0.472694	-3.09331	0.00197937	0.0288374
Blood_0_Bl-04/Blood_0_control	Blood	Bl-04	0	Mafg	165.085	1.82215	0.423392	4.3037	1.67966e-05	0.00327418
Blood_0_Bl-04/Blood_0_control	Blood	Bl-04	0	Magea1	13.9863	8.21118	2.42697	3.3833	0.000716204	0.0175418
Blood_0_Bl-04/Blood_0_control	Blood	Bl-04	0	Maged2	305.089	2.54765	0.754127	3.37828	0.000729408	0.0176841
Blood_0_Bl-04/Blood_0_control	Blood	Bl-04	0	Maip1	24.6771	-2.6632	0.943048	-2.82403	0.00474241	0.0453565
Blood_0_Bl-04/Blood_0_control	Blood	Bl-04	0	Man2a1	218.106	-6.78518	1.3962	-4.85976	1.17529e-06	0.000635595
Blood_0_Bl-04/Blood_0_control	Blood	Bl-04	0	Man2b1	1752.88	-1.90954	0.536057	-3.56218	0.000367781	0.0129879
Blood_0_Bl-04/Blood_0_control	Blood	Bl-04	0	Manea	10.8835	-4.40437	1.42232	-3.09661	0.00195747	0.028735
Blood_0_Bl-04/Blood_0_control	Blood	Bl-04	0	Map2k2	2133.43	2.32006	0.768698	3.01817	0.00254308	0.0331237
Blood_0_Bl-04/Blood_0_control	Blood	Bl-04	0	Map2k3	1109.48	3.28742	0.789949	4.16157	3.16072e-05	0.00440276
Blood_0_Bl-04/Blood_0_control	Blood	Bl-04	0	Map3k4	58.9035	-1.60637	0.485292	-3.31012	0.000932557	0.0201756
Blood_0_Bl-04/Blood_0_control	Blood	Bl-04	0	Map3k5	78.2743	-2.7233	0.622036	-4.37804	1.19751e-05	0.00279145
Blood_0_Bl-04/Blood_0_control	Blood	Bl-04	0	Map4k3	41.5714	-2.20204	0.748828	-2.94064	0.00327531	0.0377834
Blood_0_Bl-04/Blood_0_control	Blood	Bl-04	0	Map6	7.44657	3.0339	0.972328	3.12024	0.00180705	0.0274509
Blood_0_Bl-04/Blood_0_control	Blood	Bl-04	0	Map7	128.64	3.54352	0.958286	3.69777	0.000217505	0.0101974
Blood_0_Bl-04/Blood_0_control	Blood	Bl-04	0	Mapk1ip1l	166.232	-1.6781	0.502103	-3.34214	0.000831361	0.0189226
Blood_0_Bl-04/Blood_0_control	Blood	Bl-04	0	Mapkbp1	12.2105	-3.07469	1.07227	-2.86745	0.00413788	0.0420309
Blood_0_Bl-04/Blood_0_control	Blood	Bl-04	0	Mapre2	116.827	1.53448	0.474715	3.23243	0.00122744	0.0228123
Blood_0_Bl-04/Blood_0_control	Blood	Bl-04	0	March9	22.6076	-3.49603	0.988153	-3.53794	0.000403264	0.0138029
Blood_0_Bl-04/Blood_0_control	Blood	Bl-04	0	Mat2a	504.808	-1.57226	0.453959	-3.46344	0.000533308	0.0154641
Blood_0_Bl-04/Blood_0_control	Blood	Bl-04	0	Matr3	233.039	-2.31782	0.555192	-4.17481	2.98239e-05	0.0042002
Blood_0_Bl-04/Blood_0_control	Blood	Bl-04	0	Mboat7	146.412	-1.72987	0.530969	-3.25795	0.00112222	0.0217681
Blood_0_Bl-04/Blood_0_control	Blood	Bl-04	0	Mcmbp	27.9873	-5.76452	2.05513	-2.80494	0.00503252	0.0466979
Blood_0_Bl-04/Blood_0_control	Blood	Bl-04	0	Mcph1	93.8767	4.60573	1.16193	3.96387	7.37441e-05	0.00606484
Blood_0_Bl-04/Blood_0_control	Blood	Bl-04	0	Mdm1	51.5924	-2.94714	0.766446	-3.8452	0.000120455	0.00786741
Blood_0_Bl-04/Blood_0_control	Blood	Bl-04	0	Mecp2	88.2131	-1.75957	0.526897	-3.3395	0.000839298	0.0190072
Blood_0_Bl-04/Blood_0_control	Blood	Bl-04	0	Med19	50.9702	1.43635	0.517154	2.77741	0.00547935	0.0489553
Blood_0_Bl-04/Blood_0_control	Blood	Bl-04	0	Med25	21.3774	2.17103	0.634046	3.4241	0.000616842	0.0165981
Blood_0_Bl-04/Blood_0_control	Blood	Bl-04	0	Metrn	13.4392	3.24304	1.02363	3.16817	0.00153403	0.0254327
Blood_0_Bl-04/Blood_0_control	Blood	Bl-04	0	Mettl27	78.4747	2.04894	0.605992	3.38113	0.000721873	0.0175976
Blood_0_Bl-04/Blood_0_control	Blood	Bl-04	0	Mex3c	34.4428	-3.963	0.877796	-4.51471	6.34028e-06	0.0019049
Blood_0_Bl-04/Blood_0_control	Blood	Bl-04	0	Mfsd1	26.563	-4.18424	1.37149	-3.05087	0.00228177	0.0312668
Blood_0_Bl-04/Blood_0_control	Blood	Bl-04	0	Mfsd14a	20.4263	-5.92382	1.64269	-3.60617	0.000310751	0.0121426
Blood_0_Bl-04/Blood_0_control	Blood	Bl-04	0	Mfsd2b	510.575	2.92768	0.785709	3.72617	0.000194413	0.00967735
Blood_0_Bl-04/Blood_0_control	Blood	Bl-04	0	Mfsd6	50.198	-3.58593	1.14887	-3.12126	0.00180078	0.0274174
Blood_0_Bl-04/Blood_0_control	Blood	Bl-04	0	Mgmt	20.9615	1.79055	0.605594	2.95669	0.00310962	0.0366816
Blood_0_Bl-04/Blood_0_control	Blood	Bl-04	0	Mgst3	83.629	3.20375	0.872981	3.6699	0.000242648	0.0106747
Blood_0_Bl-04/Blood_0_control	Blood	Bl-04	0	Mid1	116.677	2.53498	0.638964	3.96733	7.26829e-05	0.00606484
Blood_0_Bl-04/Blood_0_control	Blood	Bl-04	0	Midn	288.555	1.72849	0.596125	2.89955	0.00373704	0.039846
Blood_0_Bl-04/Blood_0_control	Blood	Bl-04	0	Mief2	18.3362	3.88707	1.01315	3.83663	0.000124733	0.00803043
Blood_0_Bl-04/Blood_0_control	Blood	Bl-04	0	Mier1	1003.65	1.77901	0.639704	2.78098	0.00541945	0.0487823
Blood_0_Bl-04/Blood_0_control	Blood	Bl-04	0	Mkrn2	18.6198	-3.65155	1.08692	-3.35955	0.000780696	0.0181358
Blood_0_Bl-04/Blood_0_control	Blood	Bl-04	0	Mlh3	38.3786	-1.57654	0.547477	-2.87964	0.00398124	0.0413413
Blood_0_Bl-04/Blood_0_control	Blood	Bl-04	0	Mlph	9.14716	3.50367	1.1363	3.08339	0.00204659	0.0294172
Blood_0_Bl-04/Blood_0_control	Blood	Bl-04	0	Mlxip	143.948	-1.87398	0.486872	-3.84902	0.000118594	0.0078214
Blood_0_Bl-04/Blood_0_control	Blood	Bl-04	0	Mndal	260.426	-2.47275	0.712079	-3.47258	0.000515482	0.0152694
Blood_0_Bl-04/Blood_0_control	Blood	Bl-04	0	Mob3b	41.7038	-4.08982	1.17311	-3.48631	0.000489731	0.0150481
Blood_0_Bl-04/Blood_0_control	Blood	Bl-04	0	Mogs	114.965	-2.08507	0.688613	-3.02793	0.00246239	0.0325403
Blood_0_Bl-04/Blood_0_control	Blood	Bl-04	0	Mok	44.1787	2.33854	0.619514	3.77481	0.000160132	0.00878297
Blood_0_Bl-04/Blood_0_control	Blood	Bl-04	0	Mpig6b	394.307	3.23	0.85413	3.78163	0.000155803	0.00878297
Blood_0_Bl-04/Blood_0_control	Blood	Bl-04	0	Mprip	98.1853	2.13937	0.524962	4.07529	4.59568e-05	0.00526241
Blood_0_Bl-04/Blood_0_control	Blood	Bl-04	0	Mrfap1	1055.93	3.953	0.991016	3.98884	6.63968e-05	0.0059706
Blood_0_Bl-04/Blood_0_control	Blood	Bl-04	0	Mrm1	16.9328	3.26746	1.18031	2.7683	0.00563491	0.0498587
Blood_0_Bl-04/Blood_0_control	Blood	Bl-04	0	Mrpl1	88.5314	-3.79766	1.35752	-2.79749	0.00515013	0.0472386
Blood_0_Bl-04/Blood_0_control	Blood	Bl-04	0	Mrpl23	25.9449	-2.61154	0.769395	-3.39428	0.000688097	0.0173704
Blood_0_Bl-04/Blood_0_control	Blood	Bl-04	0	Mrpl24	612.201	-0.932296	0.33245	-2.80432	0.00504224	0.0466979
Blood_0_Bl-04/Blood_0_control	Blood	Bl-04	0	Mrpl41	176.371	-1.63231	0.506463	-3.22297	0.0012687	0.023173
Blood_0_Bl-04/Blood_0_control	Blood	Bl-04	0	Mrpl43	46.3145	-1.63719	0.494739	-3.30919	0.000935658	0.0201756
Blood_0_Bl-04/Blood_0_control	Blood	Bl-04	0	Mrpl57	264.267	4.16211	1.00385	4.14617	3.38087e-05	0.00452747
Blood_0_Bl-04/Blood_0_control	Blood	Bl-04	0	Mrps9	127.039	-1.19998	0.387633	-3.09568	0.00196365	0.0287633
Blood_0_Bl-04/Blood_0_control	Blood	Bl-04	0	Msr1	141.821	-4.88543	1.2316	-3.96673	7.28657e-05	0.00606484
Blood_0_Bl-04/Blood_0_control	Blood	Bl-04	0	Msto1	21.1383	-4.52827	1.37468	-3.29405	0.000987536	0.0207496
Blood_0_Bl-04/Blood_0_control	Blood	Bl-04	0	Mtmr6	178.605	-2.55602	0.847721	-3.01516	0.0025684	0.0333571
Blood_0_Bl-04/Blood_0_control	Blood	Bl-04	0	Mup13	4656.91	5.12812	1.83713	2.79137	0.00524856	0.0478188
Blood_0_Bl-04/Blood_0_control	Blood	Bl-04	0	Mup8	1794.25	8.22968	1.81835	4.52591	6.01349e-06	0.00189075
Blood_0_Bl-04/Blood_0_control	Blood	Bl-04	0	Mxd1	1423.22	1.78849	0.615448	2.906	0.00366086	0.0395642
Blood_0_Bl-04/Blood_0_control	Blood	Bl-04	0	Mybbp1a	103.157	-2.73071	0.738586	-3.69722	0.000217977	0.0101974
Blood_0_Bl-04/Blood_0_control	Blood	Bl-04	0	Myc	177.372	-2.53289	0.668208	-3.79057	0.0001503	0.00864708
Blood_0_Bl-04/Blood_0_control	Blood	Bl-04	0	Mycbp2	280.153	-2.27843	0.763072	-2.98586	0.00282779	0.0349491
Blood_0_Bl-04/Blood_0_control	Blood	Bl-04	0	Myd88	865.975	1.86764	0.661194	2.82464	0.00473332	0.0453565
Blood_0_Bl-04/Blood_0_control	Blood	Bl-04	0	Myh9	3748.19	2.04276	0.520361	3.92566	8.64918e-05	0.00668211
Blood_0_Bl-04/Blood_0_control	Blood	Bl-04	0	Myl4	16.8623	-3.21149	1.00473	-3.19638	0.00139162	0.0243084
Blood_0_Bl-04/Blood_0_control	Blood	Bl-04	0	Myl6	9680.14	1.46562	0.49718	2.94787	0.00319974	0.0372294
Blood_0_Bl-04/Blood_0_control	Blood	Bl-04	0	Myo5a	78.8419	-3.10242	0.98742	-3.14194	0.00167832	0.0267746
Blood_0_Bl-04/Blood_0_control	Blood	Bl-04	0	Myt1	9.62414	6.35212	2.23276	2.84497	0.00444162	0.0437608
Blood_0_Bl-04/Blood_0_control	Blood	Bl-04	0	Naa25	73.5042	-3.04428	0.701904	-4.33717	1.44331e-05	0.00300209
Blood_0_Bl-04/Blood_0_control	Blood	Bl-04	0	Naa35	53.7775	-2.26787	0.705117	-3.21631	0.0012985	0.0234703
Blood_0_Bl-04/Blood_0_control	Blood	Bl-04	0	Naa60	277.991	-1.66991	0.579012	-2.88407	0.00392571	0.0410802
Blood_0_Bl-04/Blood_0_control	Blood	Bl-04	0	Naca	440.254	-3.24335	0.868072	-3.73627	0.000186767	0.00957135
Blood_0_Bl-04/Blood_0_control	Blood	Bl-04	0	Nae1	78.1992	-2.32054	0.711271	-3.26252	0.00110426	0.0216058
Blood_0_Bl-04/Blood_0_control	Blood	Bl-04	0	Nap1l4	514.196	-1.44479	0.497878	-2.90189	0.00370924	0.0397869
Blood_0_Bl-04/Blood_0_control	Blood	Bl-04	0	Napg	28.035	-1.93088	0.601056	-3.21247	0.00131597	0.0236909
Blood_0_Bl-04/Blood_0_control	Blood	Bl-04	0	Nars	529.379	1.47672	0.363796	4.0592	4.92421e-05	0.00532603
Blood_0_Bl-04/Blood_0_control	Blood	Bl-04	0	Nbdy	187.173	2.76508	0.646302	4.2783	1.88322e-05	0.003333
Blood_0_Bl-04/Blood_0_control	Blood	Bl-04	0	Ncf1	88.7755	-2.30327	0.646609	-3.56208	0.000367925	0.0129879
Blood_0_Bl-04/Blood_0_control	Blood	Bl-04	0	Nckap1l	217.401	-3.18654	1.05889	-3.00931	0.0026184	0.0337535
Blood_0_Bl-04/Blood_0_control	Blood	Bl-04	0	Ncl	434.068	-1.42797	0.437536	-3.26365	0.00109985	0.021582
Blood_0_Bl-04/Blood_0_control	Blood	Bl-04	0	Ncoa3	208.353	-1.74518	0.547105	-3.18984	0.0014235	0.0245513
Blood_0_Bl-04/Blood_0_control	Blood	Bl-04	0	Ncstn	46.3316	-2.25617	0.652812	-3.45607	0.000548105	0.0155773
Blood_0_Bl-04/Blood_0_control	Blood	Bl-04	0	Ndst1	65.3337	-2.19517	0.671339	-3.26984	0.00107607	0.0214266
Blood_0_Bl-04/Blood_0_control	Blood	Bl-04	0	Ndufa1	6282.69	2.64657	0.559039	4.73414	2.19982e-06	0.00102394
Blood_0_Bl-04/Blood_0_control	Blood	Bl-04	0	Ndufa2	179.319	2.71455	0.883505	3.07248	0.00212288	0.0301097
Blood_0_Bl-04/Blood_0_control	Blood	Bl-04	0	Ndufaf4	67.0656	-3.04016	0.864571	-3.51638	0.000437481	0.0141448
Blood_0_Bl-04/Blood_0_control	Blood	Bl-04	0	Ndufb11	146.75	3.21605	1.06169	3.02919	0.00245208	0.032534
Blood_0_Bl-04/Blood_0_control	Blood	Bl-04	0	Ndufb6	849.722	2.59399	0.897452	2.89039	0.00384759	0.040482
Blood_0_Bl-04/Blood_0_control	Blood	Bl-04	0	Ndufs8	49.3128	-3.082	1.02523	-3.00615	0.00264578	0.0338447
Blood_0_Bl-04/Blood_0_control	Blood	Bl-04	0	Necap2	412.083	2.27552	0.625578	3.63748	0.000275322	0.0113745
Blood_0_Bl-04/Blood_0_control	Blood	Bl-04	0	Neurl3	64.2993	3.47548	1.06762	3.25536	0.0011325	0.0218792
Blood_0_Bl-04/Blood_0_control	Blood	Bl-04	0	Nfkbia	306.529	-1.13663	0.396768	-2.86474	0.00417357	0.0422164
Blood_0_Bl-04/Blood_0_control	Blood	Bl-04	0	Nfya	130.857	-2.31981	0.657542	-3.528	0.000418714	0.0138556
Blood_0_Bl-04/Blood_0_control	Blood	Bl-04	0	Nfyb	77.6694	-1.80125	0.572607	-3.1457	0.00165687	0.0265414
Blood_0_Bl-04/Blood_0_control	Blood	Bl-04	0	Nid2	24.5104	-4.1821	1.17323	-3.56462	0.000364382	0.0129879
Blood_0_Bl-04/Blood_0_control	Blood	Bl-04	0	Nifk	144.516	-1.59734	0.459462	-3.47655	0.000507919	0.0151885
Blood_0_Bl-04/Blood_0_control	Blood	Bl-04	0	Nipa1	75.3953	2.0182	0.67465	2.99148	0.0027763	0.0345851
Blood_0_Bl-04/Blood_0_control	Blood	Bl-04	0	Nipsnap3b	105.272	-2.80857	0.847179	-3.3152	0.00091578	0.0200202
Blood_0_Bl-04/Blood_0_control	Blood	Bl-04	0	Nisch	114.302	-1.15612	0.360405	-3.20785	0.00133731	0.0238214
Blood_0_Bl-04/Blood_0_control	Blood	Bl-04	0	Nkg7	1389	2.38069	0.798832	2.98022	0.00288044	0.035275
Blood_0_Bl-04/Blood_0_control	Blood	Bl-04	0	Nkrf	49.1664	-1.73819	0.52987	-3.28041	0.00103658	0.0210854
Blood_0_Bl-04/Blood_0_control	Blood	Bl-04	0	Nlrc3	39.7892	-2.26605	0.72615	-3.12064	0.00180458	0.0274443
Blood_0_Bl-04/Blood_0_control	Blood	Bl-04	0	Nlrx1	528.776	1.69822	0.579383	2.93108	0.00337783	0.0382749
Blood_0_Bl-04/Blood_0_control	Blood	Bl-04	0	Nmd3	189.083	-1.52439	0.497822	-3.06211	0.00219782	0.0306651
Blood_0_Bl-04/Blood_0_control	Blood	Bl-04	0	Nomo1	22.277	3.21609	1.02153	3.1483	0.00164224	0.0264761
Blood_0_Bl-04/Blood_0_control	Blood	Bl-04	0	Nop10	72.4658	-3.01956	1.01968	-2.96129	0.00306357	0.0363967
Blood_0_Bl-04/Blood_0_control	Blood	Bl-04	0	Nop58	183.457	-2.58858	0.605124	-4.27777	1.88773e-05	0.003333
Blood_0_Bl-04/Blood_0_control	Blood	Bl-04	0	Notch1	125.288	-1.56148	0.563301	-2.77202	0.00557094	0.0495171
Blood_0_Bl-04/Blood_0_control	Blood	Bl-04	0	Nploc4	215.73	2.10123	0.455525	4.61277	3.97329e-06	0.00153483
Blood_0_Bl-04/Blood_0_control	Blood	Bl-04	0	Nr2c2ap	19.563	-2.32909	0.712026	-3.27107	0.0010714	0.0214266
Blood_0_Bl-04/Blood_0_control	Blood	Bl-04	0	Nr3c1	191.385	-1.02478	0.352124	-2.91027	0.00361113	0.0394494
Blood_0_Bl-04/Blood_0_control	Blood	Bl-04	0	Nrgn	5862.4	1.99081	0.572165	3.47944	0.000502464	0.0151532
Blood_0_Bl-04/Blood_0_control	Blood	Bl-04	0	Nsmce4a	3011.76	3.58268	1.09714	3.26547	0.00109284	0.0215069
Blood_0_Bl-04/Blood_0_control	Blood	Bl-04	0	Nsrp1	48.4876	-2.20309	0.726686	-3.0317	0.00243183	0.0323925
Blood_0_Bl-04/Blood_0_control	Blood	Bl-04	0	Nsun5	27.2081	-3.08097	0.776722	-3.96664	7.28937e-05	0.00606484
Blood_0_Bl-04/Blood_0_control	Blood	Bl-04	0	Ntf5	9.0989	5.93084	2.02047	2.93537	0.00333145	0.0380095
Blood_0_Bl-04/Blood_0_control	Blood	Bl-04	0	Nubp1	88.274	-2.21087	0.619262	-3.57016	0.000356759	0.0128759
Blood_0_Bl-04/Blood_0_control	Blood	Bl-04	0	Nucks1	1360.38	2.69802	0.835057	3.23094	0.00123385	0.0228203
Blood_0_Bl-04/Blood_0_control	Blood	Bl-04	0	Nudt16	24.2804	-2.31468	0.688564	-3.3616	0.000774923	0.0180637
Blood_0_Bl-04/Blood_0_control	Blood	Bl-04	0	Nudt16l1	14.1271	-4.17426	1.41035	-2.95973	0.0030791	0.0364507
Blood_0_Bl-04/Blood_0_control	Blood	Bl-04	0	Nudt19	18.1624	2.94139	0.984652	2.98724	0.00281509	0.0348535
Blood_0_Bl-04/Blood_0_control	Blood	Bl-04	0	Nudt2	31.6555	-3.931	1.18417	-3.31963	0.000901369	0.0198801
Blood_0_Bl-04/Blood_0_control	Blood	Bl-04	0	Nudt5	107.657	-1.38145	0.491218	-2.81229	0.00491899	0.0463125
Blood_0_Bl-04/Blood_0_control	Blood	Bl-04	0	Nup85	106.635	-1.72632	0.512807	-3.36641	0.00076153	0.0180313
Blood_0_Bl-04/Blood_0_control	Blood	Bl-04	0	Nup93	81.3045	-3.9484	0.770126	-5.12695	2.94469e-07	0.000209538
Blood_0_Bl-04/Blood_0_control	Blood	Bl-04	0	Nxpe5	30.7975	-4.20912	1.47013	-2.86309	0.00419536	0.0422989
Blood_0_Bl-04/Blood_0_control	Blood	Bl-04	0	Oat	223.074	2.74956	0.852306	3.22603	0.00125521	0.023039
Blood_0_Bl-04/Blood_0_control	Blood	Bl-04	0	Oaz1	36872.4	1.68516	0.510331	3.30209	0.000959683	0.0204975
Blood_0_Bl-04/Blood_0_control	Blood	Bl-04	0	Oaz2	312.007	2.27466	0.702421	3.23831	0.00120239	0.0225744
Blood_0_Bl-04/Blood_0_control	Blood	Bl-04	0	Obox3	49.3045	4.64437	1.39977	3.31795	0.000906817	0.0199029
Blood_0_Bl-04/Blood_0_control	Blood	Bl-04	0	Obox5	12.917	6.43486	2.19037	2.9378	0.00330553	0.0379056
Blood_0_Bl-04/Blood_0_control	Blood	Bl-04	0	Odf4	9.53297	6.34713	1.9204	3.30511	0.000949383	0.02036
Blood_0_Bl-04/Blood_0_control	Blood	Bl-04	0	Ogdh	6325.45	1.35727	0.424568	3.19683	0.00138949	0.0243026
Blood_0_Bl-04/Blood_0_control	Blood	Bl-04	0	Olfr126	9.86976	6.75361	2.31037	2.92317	0.00346488	0.038683
Blood_0_Bl-04/Blood_0_control	Blood	Bl-04	0	Olfr1328	7.80853	6.80581	2.0907	3.25528	0.0011328	0.0218792
Blood_0_Bl-04/Blood_0_control	Blood	Bl-04	0	Olfr156	10.4841	5.91532	2.06079	2.87041	0.00409943	0.0419563
Blood_0_Bl-04/Blood_0_control	Blood	Bl-04	0	Olfr159	8.01307	7.67238	2.15775	3.55574	0.00037692	0.0132394
Blood_0_Bl-04/Blood_0_control	Blood	Bl-04	0	Olfr483	5.46904	6.69372	2.35073	2.84751	0.00440626	0.0435473
Blood_0_Bl-04/Blood_0_control	Blood	Bl-04	0	Opa1	33.5904	-3.70288	1.10014	-3.36583	0.000763141	0.0180376
Blood_0_Bl-04/Blood_0_control	Blood	Bl-04	0	Optn	1737.35	2.36196	0.544014	4.34173	1.41367e-05	0.00300209
Blood_0_Bl-04/Blood_0_control	Blood	Bl-04	0	Orai3	27.8776	-4.70079	1.18617	-3.96299	7.40161e-05	0.00606484
Blood_0_Bl-04/Blood_0_control	Blood	Bl-04	0	Oraov1	71.6364	-1.56083	0.415299	-3.75832	0.000171055	0.00910796
Blood_0_Bl-04/Blood_0_control	Blood	Bl-04	0	Ormdl1	143.104	-2.93334	0.857545	-3.42062	0.000624777	0.0165981
Blood_0_Bl-04/Blood_0_control	Blood	Bl-04	0	Os9	39.425	3.61155	1.25627	2.87482	0.00404258	0.0417219
Blood_0_Bl-04/Blood_0_control	Blood	Bl-04	0	Osbpl2	102.078	-2.28058	0.751986	-3.03274	0.00242344	0.0323206
Blood_0_Bl-04/Blood_0_control	Blood	Bl-04	0	Ostc	75.9715	-3.16601	0.916207	-3.45557	0.000549138	0.0155773
Blood_0_Bl-04/Blood_0_control	Blood	Bl-04	0	Otof	4.32262	7.72358	2.38104	3.24379	0.00117951	0.0223788
Blood_0_Bl-04/Blood_0_control	Blood	Bl-04	0	Otud1	96.517	-2.25254	0.612189	-3.67948	0.00023371	0.0105678
Blood_0_Bl-04/Blood_0_control	Blood	Bl-04	0	Otud6b	65.8577	-1.66173	0.469248	-3.54126	0.000398214	0.0136646
Blood_0_Bl-04/Blood_0_control	Blood	Bl-04	0	Oxr1	190.438	-2.25222	0.690523	-3.26162	0.00110779	0.0216172
Blood_0_Bl-04/Blood_0_control	Blood	Bl-04	0	P2ry10	44.3688	-3.05388	0.959583	-3.1825	0.00146007	0.024893
Blood_0_Bl-04/Blood_0_control	Blood	Bl-04	0	P2ry10b	162.516	-3.39941	0.826437	-4.11333	3.89995e-05	0.00488216
Blood_0_Bl-04/Blood_0_control	Blood	Bl-04	0	P4ha1	71.7452	-2.21321	0.539241	-4.1043	4.05541e-05	0.00493957
Blood_0_Bl-04/Blood_0_control	Blood	Bl-04	0	Pabpc4	845.063	2.71029	0.856111	3.16582	0.00154647	0.0255916
Blood_0_Bl-04/Blood_0_control	Blood	Bl-04	0	Paip2b	34.1966	-3.3811	1.11292	-3.03803	0.00238129	0.0321308
Blood_0_Bl-04/Blood_0_control	Blood	Bl-04	0	Pak1	10.9364	-3.38343	1.1745	-2.88075	0.00396727	0.0412913
Blood_0_Bl-04/Blood_0_control	Blood	Bl-04	0	Pak2	268.463	-2.35326	0.788561	-2.98425	0.00284272	0.0349491
Blood_0_Bl-04/Blood_0_control	Blood	Bl-04	0	Pak6	11.7461	4.23045	1.51488	2.79259	0.00522873	0.0477329
Blood_0_Bl-04/Blood_0_control	Blood	Bl-04	0	Parp4	47.1098	-2.07329	0.713269	-2.90674	0.00365217	0.0395475
Blood_0_Bl-04/Blood_0_control	Blood	Bl-04	0	Parp6	23.9842	-2.59913	0.831899	-3.12434	0.00178205	0.0272241
Blood_0_Bl-04/Blood_0_control	Blood	Bl-04	0	Parpbp	49.4024	2.51957	0.548332	4.59497	4.32819e-06	0.00158155
Blood_0_Bl-04/Blood_0_control	Blood	Bl-04	0	Pcdhga1	7.64724	5.9074	2.05086	2.88045	0.00397104	0.0412988
Blood_0_Bl-04/Blood_0_control	Blood	Bl-04	0	Pced1b	37.7162	-2.15864	0.674878	-3.19856	0.00138114	0.0242215
Blood_0_Bl-04/Blood_0_control	Blood	Bl-04	0	Pcf11	182.738	2.19037	0.586174	3.73673	0.000186432	0.00957135
Blood_0_Bl-04/Blood_0_control	Blood	Bl-04	0	Pcif1	206.114	3.22877	1.04719	3.08326	0.00204746	0.0294172
Blood_0_Bl-04/Blood_0_control	Blood	Bl-04	0	Pck2	973.407	2.10003	0.665576	3.15521	0.00160381	0.0261247
Blood_0_Bl-04/Blood_0_control	Blood	Bl-04	0	Pcm1	239.829	-2.31694	0.610856	-3.79294	0.000148877	0.00864265
Blood_0_Bl-04/Blood_0_control	Blood	Bl-04	0	Pcnx3	149.429	3.2835	1.05032	3.1262	0.00177079	0.0271749
Blood_0_Bl-04/Blood_0_control	Blood	Bl-04	0	Pdcd10	297.341	-1.88367	0.651072	-2.89318	0.00381366	0.040287
Blood_0_Bl-04/Blood_0_control	Blood	Bl-04	0	Pdcd2	54.4747	-2.96748	0.537875	-5.51705	3.44738e-08	5.17873e-05
Blood_0_Bl-04/Blood_0_control	Blood	Bl-04	0	Pde12	37.2881	-3.29057	0.748347	-4.39712	1.09696e-05	0.00273731
Blood_0_Bl-04/Blood_0_control	Blood	Bl-04	0	Pde3b	71.2414	-4.66991	1.25275	-3.72773	0.000193212	0.00967735
Blood_0_Bl-04/Blood_0_control	Blood	Bl-04	0	Pde6b	6.69611	6.50572	2.04697	3.17821	0.00148185	0.0249846
Blood_0_Bl-04/Blood_0_control	Blood	Bl-04	0	Pdf	50.7194	-2.55681	0.611277	-4.18273	2.88027e-05	0.00409908
Blood_0_Bl-04/Blood_0_control	Blood	Bl-04	0	Pdha1	192.209	-1.37502	0.378734	-3.63057	0.000282792	0.0114815
Blood_0_Bl-04/Blood_0_control	Blood	Bl-04	0	Pdia6	144.289	-3.70704	1.11515	-3.32426	0.000886541	0.0197139
Blood_0_Bl-04/Blood_0_control	Blood	Bl-04	0	Pdlim4	38.8222	-2.65516	0.667404	-3.97834	6.9398e-05	0.0060145
Blood_0_Bl-04/Blood_0_control	Blood	Bl-04	0	Pdlim5	323.27	1.24809	0.439655	2.83879	0.00452847	0.0444303
Blood_0_Bl-04/Blood_0_control	Blood	Bl-04	0	Pds5a	318.445	-1.60342	0.557385	-2.87668	0.00401881	0.0415267
Blood_0_Bl-04/Blood_0_control	Blood	Bl-04	0	Pdzd2	15.7652	3.49312	1.16752	2.99191	0.00277236	0.0345778
Blood_0_Bl-04/Blood_0_control	Blood	Bl-04	0	Pear1	142.497	3.86487	0.945059	4.08955	4.32212e-05	0.00516638
Blood_0_Bl-04/Blood_0_control	Blood	Bl-04	0	Pelp1	23.7837	-3.1341	1.03674	-3.02303	0.00250262	0.0328768
Blood_0_Bl-04/Blood_0_control	Blood	Bl-04	0	Pex1	168.154	2.96645	0.968196	3.06389	0.00218479	0.0305148
Blood_0_Bl-04/Blood_0_control	Blood	Bl-04	0	Pex6	32.981	-2.45557	0.884346	-2.7767	0.00549134	0.0490052
Blood_0_Bl-04/Blood_0_control	Blood	Bl-04	0	Pf4	709.419	2.63233	0.710049	3.70725	0.000209523	0.010117
Blood_0_Bl-04/Blood_0_control	Blood	Bl-04	0	Pfas	136.509	1.17975	0.383344	3.07752	0.00208731	0.0297845
Blood_0_Bl-04/Blood_0_control	Blood	Bl-04	0	Pfdn2	70.1813	-2.09373	0.690696	-3.03133	0.0024348	0.0324001
Blood_0_Bl-04/Blood_0_control	Blood	Bl-04	0	Pfdn4	112.371	-1.15014	0.366333	-3.13962	0.00169168	0.0267952
Blood_0_Bl-04/Blood_0_control	Blood	Bl-04	0	Pgm3	12.6121	-4.42716	1.43502	-3.08509	0.00203488	0.0294072
Blood_0_Bl-04/Blood_0_control	Blood	Bl-04	0	Phf11c	88.351	-1.67733	0.605882	-2.76841	0.00563305	0.0498587
Blood_0_Bl-04/Blood_0_control	Blood	Bl-04	0	Phf12	22.4471	-2.12225	0.729961	-2.90734	0.00364512	0.0395475
Blood_0_Bl-04/Blood_0_control	Blood	Bl-04	0	Phka1	11.9065	-3.14567	1.07364	-2.92992	0.00339044	0.0382749
Blood_0_Bl-04/Blood_0_control	Blood	Bl-04	0	Phtf1	49.3684	-2.01314	0.656095	-3.06836	0.00215237	0.0302952
Blood_0_Bl-04/Blood_0_control	Blood	Bl-04	0	Pi4k2b	124.993	2.07798	0.457769	4.53937	5.6422e-06	0.00181625
Blood_0_Bl-04/Blood_0_control	Blood	Bl-04	0	Pi4ka	280.891	-1.68267	0.476829	-3.52887	0.000417334	0.0138556
Blood_0_Bl-04/Blood_0_control	Blood	Bl-04	0	Pibf1	415.604	2.16405	0.588747	3.67569	0.00023721	0.0106657
Blood_0_Bl-04/Blood_0_control	Blood	Bl-04	0	Pign	75.9591	-6.12704	1.68142	-3.64397	0.000268464	0.0113186
Blood_0_Bl-04/Blood_0_control	Blood	Bl-04	0	Pigp	72.3755	-3.07897	0.998251	-3.08436	0.0020399	0.0294072
Blood_0_Bl-04/Blood_0_control	Blood	Bl-04	0	Pigq	735.829	3.449	0.810643	4.25465	2.09376e-05	0.00349477
Blood_0_Bl-04/Blood_0_control	Blood	Bl-04	0	Pigt	215.055	-2.99714	0.707172	-4.23821	2.25314e-05	0.00354215
Blood_0_Bl-04/Blood_0_control	Blood	Bl-04	0	Pik3ca	485.227	-1.32925	0.409977	-3.24225	0.00118589	0.0223927
Blood_0_Bl-04/Blood_0_control	Blood	Bl-04	0	Pim3	59.591	4.64318	1.29775	3.57786	0.000346417	0.012731
Blood_0_Bl-04/Blood_0_control	Blood	Bl-04	0	Pink1	957.698	1.93186	0.536431	3.60131	0.000316614	0.0122949
Blood_0_Bl-04/Blood_0_control	Blood	Bl-04	0	Pip4k2a	2169.23	2.13044	0.733882	2.90297	0.00369646	0.0397139
Blood_0_Bl-04/Blood_0_control	Blood	Bl-04	0	Pip4k2b	58.2847	-1.22935	0.425192	-2.89128	0.00383674	0.0404656
Blood_0_Bl-04/Blood_0_control	Blood	Bl-04	0	Pip4p1	23.3588	2.09982	0.706707	2.97128	0.00296562	0.0357355
Blood_0_Bl-04/Blood_0_control	Blood	Bl-04	0	Pip5k1c	60.7764	-1.3956	0.48679	-2.86694	0.00414456	0.0420325
Blood_0_Bl-04/Blood_0_control	Blood	Bl-04	0	Pja1	104.218	3.47884	1.12886	3.08173	0.00205803	0.0295065
Blood_0_Bl-04/Blood_0_control	Blood	Bl-04	0	Pkm	263.448	1.67257	0.58037	2.88191	0.00395275	0.0412673
Blood_0_Bl-04/Blood_0_control	Blood	Bl-04	0	Pkn1	190.669	-2.2636	0.668218	-3.38752	0.000705279	0.0174003
Blood_0_Bl-04/Blood_0_control	Blood	Bl-04	0	Plaa	318.625	2.00831	0.583325	3.44287	0.000575587	0.0159793
Blood_0_Bl-04/Blood_0_control	Blood	Bl-04	0	Plcb1	30.9023	-3.65129	1.15205	-3.16937	0.00152768	0.0254327
Blood_0_Bl-04/Blood_0_control	Blood	Bl-04	0	Plch1	5.06546	5.91718	1.96032	3.01847	0.00254056	0.0331237
Blood_0_Bl-04/Blood_0_control	Blood	Bl-04	0	Plekha1	101.423	-2.69683	0.630485	-4.2774	1.89091e-05	0.003333
Blood_0_Bl-04/Blood_0_control	Blood	Bl-04	0	Plekhm1	43.3631	-2.75559	0.780522	-3.53044	0.00041487	0.0138556
Blood_0_Bl-04/Blood_0_control	Blood	Bl-04	0	Plin2	571.353	-2.67989	0.817519	-3.27808	0.00104515	0.0211612
Blood_0_Bl-04/Blood_0_control	Blood	Bl-04	0	Plp2	8.06261	4.26755	1.48776	2.86844	0.00412508	0.0420226
Blood_0_Bl-04/Blood_0_control	Blood	Bl-04	0	Plscr1	33.3454	-3.51169	1.17927	-2.97784	0.00290287	0.0354235
Blood_0_Bl-04/Blood_0_control	Blood	Bl-04	0	Plxdc2	49.6605	-5.20065	1.34261	-3.87354	0.000107264	0.00746584
Blood_0_Bl-04/Blood_0_control	Blood	Bl-04	0	Pnliprp2	23.331	19.3067	3.58975	5.37829	7.51962e-08	9.24229e-05
Blood_0_Bl-04/Blood_0_control	Blood	Bl-04	0	Pnpla2	158.446	1.64156	0.5602	2.9303	0.00338629	0.0382749
Blood_0_Bl-04/Blood_0_control	Blood	Bl-04	0	Pnpla6	61.5739	-1.43986	0.45257	-3.18152	0.00146503	0.0249458
Blood_0_Bl-04/Blood_0_control	Blood	Bl-04	0	Pnpo	467.133	2.47817	0.609746	4.06426	4.81847e-05	0.0052964
Blood_0_Bl-04/Blood_0_control	Blood	Bl-04	0	Polb	24.2127	-5.07345	1.39437	-3.63854	0.000274188	0.0113745
Blood_0_Bl-04/Blood_0_control	Blood	Bl-04	0	Pold2	16.3133	-2.7951	0.942876	-2.96444	0.00303239	0.0361853
Blood_0_Bl-04/Blood_0_control	Blood	Bl-04	0	Pole4	569.047	2.51411	0.806045	3.11907	0.00181424	0.0275293
Blood_0_Bl-04/Blood_0_control	Blood	Bl-04	0	Polr2l	452.635	1.94826	0.610064	3.19353	0.00140545	0.0244729
Blood_0_Bl-04/Blood_0_control	Blood	Bl-04	0	Pop1	7.83637	-4.49885	1.41304	-3.1838	0.00145356	0.0248447
Blood_0_Bl-04/Blood_0_control	Blood	Bl-04	0	Pou2af1	140.44	-2.55532	0.700493	-3.64788	0.000264408	0.011277
Blood_0_Bl-04/Blood_0_control	Blood	Bl-04	0	Ppargc1b	7.38542	4.42363	1.57492	2.80881	0.00497256	0.0465898
Blood_0_Bl-04/Blood_0_control	Blood	Bl-04	0	Ppfia1	222.963	-1.11675	0.386513	-2.88929	0.00386114	0.0405931
Blood_0_Bl-04/Blood_0_control	Blood	Bl-04	0	Ppia	1585.37	-1.00461	0.335908	-2.99072	0.00278318	0.0345851
Blood_0_Bl-04/Blood_0_control	Blood	Bl-04	0	Ppif	375.705	4.17436	0.912521	4.57453	4.77285e-06	0.00161322
Blood_0_Bl-04/Blood_0_control	Blood	Bl-04	0	Ppil2	144.433	-1.54017	0.510264	-3.01838	0.00254132	0.0331237
Blood_0_Bl-04/Blood_0_control	Blood	Bl-04	0	Ppp1cb	8778.98	1.99787	0.654573	3.05217	0.0022719	0.0312399
Blood_0_Bl-04/Blood_0_control	Blood	Bl-04	0	Ppp1r14b	216.002	-1.26086	0.423691	-2.97589	0.00292143	0.0355195
Blood_0_Bl-04/Blood_0_control	Blood	Bl-04	0	Ppp1r18	616.1	2.71971	0.873264	3.11442	0.00184309	0.0277181
Blood_0_Bl-04/Blood_0_control	Blood	Bl-04	0	Ppp1r7	38.1072	-2.09501	0.713962	-2.93434	0.00334252	0.0381037
Blood_0_Bl-04/Blood_0_control	Blood	Bl-04	0	Ppp1r8	29.0395	-2.05598	0.647383	-3.17584	0.00149404	0.0251166
Blood_0_Bl-04/Blood_0_control	Blood	Bl-04	0	Ppp2r2a	38.1638	-2.21786	0.699652	-3.16994	0.0015247	0.0254304
Blood_0_Bl-04/Blood_0_control	Blood	Bl-04	0	Ppp4r2	190.364	-1.13896	0.340375	-3.34619	0.00081929	0.0187668
Blood_0_Bl-04/Blood_0_control	Blood	Bl-04	0	Ppt1	228.812	-2.91478	0.897883	-3.24628	0.00116925	0.0222651
Blood_0_Bl-04/Blood_0_control	Blood	Bl-04	0	Prdm11	21.3471	-3.01505	0.932129	-3.23458	0.00121821	0.022749
Blood_0_Bl-04/Blood_0_control	Blood	Bl-04	0	Prdx2	12154.9	2.42606	0.530327	4.57464	4.77046e-06	0.00161322
Blood_0_Bl-04/Blood_0_control	Blood	Bl-04	0	Prdx6b	19.3214	-5.35082	1.6168	-3.3095	0.000934612	0.0201756
Blood_0_Bl-04/Blood_0_control	Blood	Bl-04	0	Prep	94.7335	1.44655	0.415835	3.47867	0.000503906	0.0151532
Blood_0_Bl-04/Blood_0_control	Blood	Bl-04	0	Prkab2	195.986	2.00506	0.651553	3.07736	0.00208844	0.0297845
Blood_0_Bl-04/Blood_0_control	Blood	Bl-04	0	Prkacb	124.293	-1.58887	0.436876	-3.63689	0.00027595	0.0113745
Blood_0_Bl-04/Blood_0_control	Blood	Bl-04	0	Prkcb	54.5038	-3.04647	0.958118	-3.17965	0.00147455	0.0249511
Blood_0_Bl-04/Blood_0_control	Blood	Bl-04	0	Prkx	122.716	-2.09729	0.749458	-2.79842	0.00513538	0.0471994
Blood_0_Bl-04/Blood_0_control	Blood	Bl-04	0	Prmt1	193.919	-1.83425	0.483611	-3.79282	0.000148945	0.00864265
Blood_0_Bl-04/Blood_0_control	Blood	Bl-04	0	Prmt3	63.5449	-1.87494	0.530213	-3.5362	0.000405925	0.013833
Blood_0_Bl-04/Blood_0_control	Blood	Bl-04	0	Prnp	145.452	2.48424	0.641578	3.87208	0.00010791	0.00746584
Blood_0_Bl-04/Blood_0_control	Blood	Bl-04	0	Prpf39	222.917	-1.68558	0.546129	-3.08641	0.00202588	0.0293254
Blood_0_Bl-04/Blood_0_control	Blood	Bl-04	0	Prpf8	177.993	-2.44597	0.693273	-3.52815	0.000418468	0.0138556
Blood_0_Bl-04/Blood_0_control	Blood	Bl-04	0	Prps2	72.4224	-3.29196	0.823543	-3.99732	6.40633e-05	0.0059706
Blood_0_Bl-04/Blood_0_control	Blood	Bl-04	0	Prrc2c	443.35	-1.62424	0.562614	-2.88696	0.00388985	0.0408631
Blood_0_Bl-04/Blood_0_control	Blood	Bl-04	0	Prss2	101.657	21.3346	2.80243	7.6129	2.68023e-14	6.03945e-11
Blood_0_Bl-04/Blood_0_control	Blood	Bl-04	0	Psenen	595.619	2.43306	0.620808	3.91918	8.88522e-05	0.0067869
Blood_0_Bl-04/Blood_0_control	Blood	Bl-04	0	Psma6	194.035	-2.07343	0.711727	-2.91324	0.00357704	0.0392864
Blood_0_Bl-04/Blood_0_control	Blood	Bl-04	0	Psmb11	5.25123	6.0408	1.64432	3.67374	0.000239031	0.0106657
Blood_0_Bl-04/Blood_0_control	Blood	Bl-04	0	Psmb2	69.313	-3.23567	1.03459	-3.1275	0.00176298	0.0271357
Blood_0_Bl-04/Blood_0_control	Blood	Bl-04	0	Psmb5	228.929	3.75121	1.02678	3.65336	0.000258832	0.0111427
Blood_0_Bl-04/Blood_0_control	Blood	Bl-04	0	Psmd1	107.328	-4.35635	1.03924	-4.19184	2.76699e-05	0.00397976
Blood_0_Bl-04/Blood_0_control	Blood	Bl-04	0	Psmd11	317.919	-1.65658	0.54243	-3.05399	0.00225817	0.0311343
Blood_0_Bl-04/Blood_0_control	Blood	Bl-04	0	Psmd5	120.394	-2.24147	0.502353	-4.46195	8.12179e-06	0.00215307
Blood_0_Bl-04/Blood_0_control	Blood	Bl-04	0	Psmd8	606.971	1.00428	0.304616	3.29687	0.000977673	0.0206857
Blood_0_Bl-04/Blood_0_control	Blood	Bl-04	0	Psph	67.4047	-1.66416	0.556899	-2.98826	0.00280572	0.0347693
Blood_0_Bl-04/Blood_0_control	Blood	Bl-04	0	Pstpip2	107.13	-3.47514	0.691484	-5.02564	5.01769e-07	0.000317076
Blood_0_Bl-04/Blood_0_control	Blood	Bl-04	0	Ptges3l	16.6169	2.92347	0.978133	2.98883	0.00280047	0.0347362
Blood_0_Bl-04/Blood_0_control	Blood	Bl-04	0	Ptk2	242.64	1.92307	0.450885	4.2651	1.99814e-05	0.00341961
Blood_0_Bl-04/Blood_0_control	Blood	Bl-04	0	Ptpn22	189.562	-2.7678	0.701547	-3.94528	7.9706e-05	0.00641443
Blood_0_Bl-04/Blood_0_control	Blood	Bl-04	0	Ptpre	50.5246	-2.36499	0.694237	-3.40661	0.000657751	0.0170512
Blood_0_Bl-04/Blood_0_control	Blood	Bl-04	0	Ptprh	6.95486	3.84075	1.38293	2.77725	0.00548212	0.0489553
Blood_0_Bl-04/Blood_0_control	Blood	Bl-04	0	Ptprn	22.9762	3.51221	1.0778	3.25868	0.00111933	0.0217433
Blood_0_Bl-04/Blood_0_control	Blood	Bl-04	0	Pttg1ip	3473.66	1.80451	0.551702	3.27082	0.00107237	0.0214266
Blood_0_Bl-04/Blood_0_control	Blood	Bl-04	0	Pum3	116.859	-2.82559	0.747741	-3.77883	0.000157564	0.00878297
Blood_0_Bl-04/Blood_0_control	Blood	Bl-04	0	Pus3	20.299	-5.34057	1.62225	-3.29208	0.000994506	0.0207496
Blood_0_Bl-04/Blood_0_control	Blood	Bl-04	0	Pxdc1	49.5689	3.21436	1.00197	3.20804	0.00133641	0.0238214
Blood_0_Bl-04/Blood_0_control	Blood	Bl-04	0	Qars	180.507	-1.66453	0.382817	-4.34811	1.37315e-05	0.00299933
Blood_0_Bl-04/Blood_0_control	Blood	Bl-04	0	Qrich2	7.09041	4.55924	1.55998	2.92262	0.00347097	0.0387191
Blood_0_Bl-04/Blood_0_control	Blood	Bl-04	0	Qtrt2	31.28	-2.72622	0.711425	-3.83206	0.000127075	0.00808333
Blood_0_Bl-04/Blood_0_control	Blood	Bl-04	0	Rab19	12.8104	-2.62393	0.931472	-2.81697	0.00484795	0.0458351
Blood_0_Bl-04/Blood_0_control	Blood	Bl-04	0	Rab21	726.224	2.53561	0.713294	3.55479	0.000378278	0.0132495
Blood_0_Bl-04/Blood_0_control	Blood	Bl-04	0	Rab31	75.5991	-1.99497	0.674422	-2.95805	0.00309596	0.0365886
Blood_0_Bl-04/Blood_0_control	Blood	Bl-04	0	Rab43	248.05	2.43898	0.737003	3.30933	0.000935206	0.0201756
Blood_0_Bl-04/Blood_0_control	Blood	Bl-04	0	Rab5b	249.013	-2.9178	0.852718	-3.42177	0.000622157	0.0165981
Blood_0_Bl-04/Blood_0_control	Blood	Bl-04	0	Rab5c	126.22	1.02817	0.28421	3.61765	0.000297288	0.0117635
Blood_0_Bl-04/Blood_0_control	Blood	Bl-04	0	Rac1	1028.48	1.7528	0.516464	3.39386	0.00068916	0.0173704
Blood_0_Bl-04/Blood_0_control	Blood	Bl-04	0	Rack1	515.118	-2.54174	0.722939	-3.51584	0.000438364	0.0141448
Blood_0_Bl-04/Blood_0_control	Blood	Bl-04	0	Rad54b	137.161	1.61193	0.520869	3.0947	0.00197009	0.0288265
Blood_0_Bl-04/Blood_0_control	Blood	Bl-04	0	Rae1	114.358	-1.4865	0.463541	-3.20684	0.00134203	0.0238328
Blood_0_Bl-04/Blood_0_control	Blood	Bl-04	0	Rai1	23.3461	-2.20077	0.767563	-2.86722	0.00414091	0.0420309
Blood_0_Bl-04/Blood_0_control	Blood	Bl-04	0	Ralbp1	144.269	1.52782	0.487716	3.13261	0.00173262	0.0270184
Blood_0_Bl-04/Blood_0_control	Blood	Bl-04	0	Ralgds	67.0745	-1.77624	0.631547	-2.81253	0.00491537	0.0463106
Blood_0_Bl-04/Blood_0_control	Blood	Bl-04	0	Ranbp10	5353.14	2.0818	0.609394	3.41618	0.000635059	0.0167695
Blood_0_Bl-04/Blood_0_control	Blood	Bl-04	0	Ranbp6	23.7487	-2.67586	0.924898	-2.89314	0.00381415	0.040287
Blood_0_Bl-04/Blood_0_control	Blood	Bl-04	0	Rarg	94.7055	-1.81332	0.63161	-2.87095	0.00409244	0.0419563
Blood_0_Bl-04/Blood_0_control	Blood	Bl-04	0	Rars	61.7276	-5.56566	1.295	-4.2978	1.72501e-05	0.0032848
Blood_0_Bl-04/Blood_0_control	Blood	Bl-04	0	Rasa1	87.4301	-3.41632	1.14672	-2.97921	0.00288997	0.0353277
Blood_0_Bl-04/Blood_0_control	Blood	Bl-04	0	Rasgrp1	306.586	-2.28448	0.69053	-3.30831	0.00093862	0.0202072
Blood_0_Bl-04/Blood_0_control	Blood	Bl-04	0	Rb1	110.733	2.51811	0.685427	3.67378	0.000238991	0.0106657
Blood_0_Bl-04/Blood_0_control	Blood	Bl-04	0	Rb1cc1	150.138	-2.90552	1.04352	-2.78435	0.00536344	0.0484393
Blood_0_Bl-04/Blood_0_control	Blood	Bl-04	0	Rbbp5	119.683	-0.911054	0.322887	-2.82158	0.0047787	0.0454346
Blood_0_Bl-04/Blood_0_control	Blood	Bl-04	0	Rbbp7	151.07	-2.2321	0.577115	-3.86768	0.000109876	0.00746832
Blood_0_Bl-04/Blood_0_control	Blood	Bl-04	0	Rbl2	65.4899	-2.49033	0.857694	-2.90352	0.00368996	0.0397139
Blood_0_Bl-04/Blood_0_control	Blood	Bl-04	0	Rbm15	33.8997	-4.33845	1.08835	-3.98625	6.71251e-05	0.0059706
Blood_0_Bl-04/Blood_0_control	Blood	Bl-04	0	Rbm15b	95.5715	-1.56904	0.411867	-3.80958	0.000139202	0.00840182
Blood_0_Bl-04/Blood_0_control	Blood	Bl-04	0	Rbm22	65.4532	-2.01294	0.57385	-3.50778	0.000451869	0.0144413
Blood_0_Bl-04/Blood_0_control	Blood	Bl-04	0	Rbm26	39.5544	-2.5125	0.718388	-3.49741	0.000469798	0.0147029
Blood_0_Bl-04/Blood_0_control	Blood	Bl-04	0	Rbm38	1170.55	1.7953	0.510534	3.51651	0.000437261	0.0141448
Blood_0_Bl-04/Blood_0_control	Blood	Bl-04	0	Rbm7	538.431	-2.00132	0.702435	-2.84912	0.004384	0.0433785
Blood_0_Bl-04/Blood_0_control	Blood	Bl-04	0	Rbmx	95.7626	-2.68	0.509934	-5.25559	1.47554e-07	0.000124683
Blood_0_Bl-04/Blood_0_control	Blood	Bl-04	0	Rbmxl1	208.548	2.9806	1.02946	2.89529	0.00378806	0.040074
Blood_0_Bl-04/Blood_0_control	Blood	Bl-04	0	Rbpms	63.8154	-2.58877	0.66549	-3.89001	0.000100239	0.00720866
Blood_0_Bl-04/Blood_0_control	Blood	Bl-04	0	Rc3h2	102.951	-2.60556	0.860651	-3.02743	0.0024664	0.0325403
Blood_0_Bl-04/Blood_0_control	Blood	Bl-04	0	Rcn2	54.9739	-1.16606	0.397127	-2.93623	0.00332229	0.037969
Blood_0_Bl-04/Blood_0_control	Blood	Bl-04	0	Reg3d	5.12201	37.5425	2.93907	12.7736	2.30263e-37	3.11316e-33
Blood_0_Bl-04/Blood_0_control	Blood	Bl-04	0	Rela	65.2838	-2.25004	0.552598	-4.07174	4.66628e-05	0.00526241
Blood_0_Bl-04/Blood_0_control	Blood	Bl-04	0	Retreg1	46.9002	-3.08869	0.797817	-3.87143	0.000108198	0.00746584
Blood_0_Bl-04/Blood_0_control	Blood	Bl-04	0	Retreg3	42.3736	1.92259	0.494644	3.88681	0.00010157	0.00722749
Blood_0_Bl-04/Blood_0_control	Blood	Bl-04	0	Rfc2	93.4207	-2.22936	0.710245	-3.13886	0.00169604	0.0267952
Blood_0_Bl-04/Blood_0_control	Blood	Bl-04	0	Rffl	168.205	2.2178	0.745956	2.9731	0.00294805	0.0356509
Blood_0_Bl-04/Blood_0_control	Blood	Bl-04	0	Rftn1	64.4912	-1.95647	0.64919	-3.01371	0.00258071	0.0334206
Blood_0_Bl-04/Blood_0_control	Blood	Bl-04	0	Rfx7	91.393	-2.22244	0.665671	-3.33865	0.000841879	0.0190338
Blood_0_Bl-04/Blood_0_control	Blood	Bl-04	0	Rhbdd1	212.462	2.46746	0.692408	3.56359	0.000365811	0.0129879
Blood_0_Bl-04/Blood_0_control	Blood	Bl-04	0	Rhno1	14.9928	-3.95336	1.36421	-2.89792	0.0037565	0.0399778
Blood_0_Bl-04/Blood_0_control	Blood	Bl-04	0	Rhog	452.851	2.15454	0.596098	3.6144	0.000301039	0.011866
Blood_0_Bl-04/Blood_0_control	Blood	Bl-04	0	Rhoj	169.005	2.549	0.684147	3.72581	0.000194692	0.00967735
Blood_0_Bl-04/Blood_0_control	Blood	Bl-04	0	Rhot1	79.3387	-1.52974	0.497926	-3.07223	0.00212467	0.0301097
Blood_0_Bl-04/Blood_0_control	Blood	Bl-04	0	Rhot2	65.3627	2.82298	0.943483	2.99209	0.00277077	0.0345778
Blood_0_Bl-04/Blood_0_control	Blood	Bl-04	0	Rhox3a2	43.2726	4.18875	1.46034	2.86834	0.00412627	0.0420226
Blood_0_Bl-04/Blood_0_control	Blood	Bl-04	0	Rhox4g	17.1261	6.42038	2.29854	2.79324	0.00521829	0.0476698
Blood_0_Bl-04/Blood_0_control	Blood	Bl-04	0	Riox2	75.6784	-1.39138	0.478154	-2.90991	0.00361538	0.0394494
Blood_0_Bl-04/Blood_0_control	Blood	Bl-04	0	Ripk1	276.623	-1.94404	0.661249	-2.93995	0.00328261	0.0378354
Blood_0_Bl-04/Blood_0_control	Blood	Bl-04	0	Ripk3	35.6571	-5.65732	1.49806	-3.77643	0.000159094	0.00878297
Blood_0_Bl-04/Blood_0_control	Blood	Bl-04	0	Rmc1	35.2443	1.78689	0.547026	3.26655	0.00108867	0.0214722
Blood_0_Bl-04/Blood_0_control	Blood	Bl-04	0	Rmi2	12.2621	4.08593	1.33819	3.05332	0.00226327	0.0311603
Blood_0_Bl-04/Blood_0_control	Blood	Bl-04	0	Rnaseh2c	300.582	3.12616	0.894714	3.49404	0.000475778	0.0148419
Blood_0_Bl-04/Blood_0_control	Blood	Bl-04	0	Rnf113a2	59.2054	-3.60178	1.10691	-3.25392	0.00113825	0.0218915
Blood_0_Bl-04/Blood_0_control	Blood	Bl-04	0	Rnf114	520.584	2.92197	0.725534	4.02734	5.64121e-05	0.00567386
Blood_0_Bl-04/Blood_0_control	Blood	Bl-04	0	Rnf121	155.616	-1.63243	0.421145	-3.87618	0.000106108	0.00746584
Blood_0_Bl-04/Blood_0_control	Blood	Bl-04	0	Rnf181	289.116	1.67885	0.593254	2.8299	0.00465623	0.0450947
Blood_0_Bl-04/Blood_0_control	Blood	Bl-04	0	Rnf2	115.182	-1.23562	0.386195	-3.19948	0.00137676	0.0242215
Blood_0_Bl-04/Blood_0_control	Blood	Bl-04	0	Rnf4	1385.27	1.32404	0.460237	2.87686	0.00401657	0.0415267
Blood_0_Bl-04/Blood_0_control	Blood	Bl-04	0	Rnf6	98.8791	-3.64653	1.07925	-3.37877	0.000728102	0.0176841
Blood_0_Bl-04/Blood_0_control	Blood	Bl-04	0	Rnpc3	58.5927	-1.92422	0.597161	-3.22228	0.00127173	0.023173
Blood_0_Bl-04/Blood_0_control	Blood	Bl-04	0	Rnps1	70.5125	-2.09355	0.636554	-3.28887	0.00100589	0.0208264
Blood_0_Bl-04/Blood_0_control	Blood	Bl-04	0	Rpf2	103.463	-1.66394	0.584049	-2.84898	0.00438597	0.0433785
Blood_0_Bl-04/Blood_0_control	Blood	Bl-04	0	Rpl10	479.893	-1.6986	0.503362	-3.3745	0.00073949	0.0177268
Blood_0_Bl-04/Blood_0_control	Blood	Bl-04	0	Rpl13a	2712.38	-2.09862	0.616137	-3.4061	0.000658983	0.0170512
Blood_0_Bl-04/Blood_0_control	Blood	Bl-04	0	Rpl21-ps4	1744.08	-1.86237	0.619852	-3.00454	0.00265984	0.0339174
Blood_0_Bl-04/Blood_0_control	Blood	Bl-04	0	Rpl22	2216.11	-1.09618	0.376738	-2.90967	0.00361814	0.0394494
Blood_0_Bl-04/Blood_0_control	Blood	Bl-04	0	Rpl23a-ps3	1859.25	1.68375	0.573502	2.9359	0.0033258	0.037977
Blood_0_Bl-04/Blood_0_control	Blood	Bl-04	0	Rpl27a	1357.19	-1.43065	0.484277	-2.95419	0.00313492	0.0367598
Blood_0_Bl-04/Blood_0_control	Blood	Bl-04	0	Rpl34	860.799	-2.06217	0.659571	-3.12653	0.00176883	0.0271749
Blood_0_Bl-04/Blood_0_control	Blood	Bl-04	0	Rpl37a	688.057	-2.7996	0.879267	-3.18402	0.00145247	0.0248447
Blood_0_Bl-04/Blood_0_control	Blood	Bl-04	0	Rpl41	70.596	2.30129	0.661475	3.47902	0.000503245	0.0151532
Blood_0_Bl-04/Blood_0_control	Blood	Bl-04	0	Rpl5	748.048	-2.16005	0.671186	-3.21825	0.00128973	0.0234056
Blood_0_Bl-04/Blood_0_control	Blood	Bl-04	0	Rpl9	499.777	-2.05347	0.535204	-3.8368	0.000124646	0.00803043
Blood_0_Bl-04/Blood_0_control	Blood	Bl-04	0	Rpl9-ps1	28.5609	-3.56885	0.968214	-3.68601	0.000227795	0.0104047
Blood_0_Bl-04/Blood_0_control	Blood	Bl-04	0	Rplp0	4331.75	1.31061	0.394716	3.32039	0.000898916	0.0198584
Blood_0_Bl-04/Blood_0_control	Blood	Bl-04	0	Rpn2	261.429	-2.13298	0.755053	-2.82494	0.00472889	0.0453565
Blood_0_Bl-04/Blood_0_control	Blood	Bl-04	0	Rprd2	131.448	-2.22951	0.62179	-3.58563	0.000336259	0.012556
Blood_0_Bl-04/Blood_0_control	Blood	Bl-04	0	Rps15	357.346	-1.72264	0.597673	-2.88225	0.0039485	0.0412673
Blood_0_Bl-04/Blood_0_control	Blood	Bl-04	0	Rps15a	377.204	-2.07579	0.629594	-3.29703	0.000977144	0.0206857
Blood_0_Bl-04/Blood_0_control	Blood	Bl-04	0	Rps16	4.60142	5.87299	2.01275	2.9179	0.00352401	0.0391285
Blood_0_Bl-04/Blood_0_control	Blood	Bl-04	0	Rps19bp1	41.8297	-2.11941	0.602156	-3.5197	0.000432033	0.0140411
Blood_0_Bl-04/Blood_0_control	Blood	Bl-04	0	Rps2	476.439	2.87935	0.845662	3.40485	0.000662011	0.0170678
Blood_0_Bl-04/Blood_0_control	Blood	Bl-04	0	Rps25	482.442	-1.9039	0.548816	-3.46911	0.000522192	0.0153292
Blood_0_Bl-04/Blood_0_control	Blood	Bl-04	0	Rps27l	1806.66	4.01478	1.12349	3.5735	0.000352242	0.0128711
Blood_0_Bl-04/Blood_0_control	Blood	Bl-04	0	Rps29	3586.31	1.17783	0.423274	2.78265	0.00539162	0.0486127
Blood_0_Bl-04/Blood_0_control	Blood	Bl-04	0	Rps3a1	478.186	-2.06393	0.719334	-2.86922	0.0041148	0.0420226
Blood_0_Bl-04/Blood_0_control	Blood	Bl-04	0	Rps6kc1	125.097	1.77184	0.511274	3.46554	0.000529176	0.0154524
Blood_0_Bl-04/Blood_0_control	Blood	Bl-04	0	Rpusd4	18.689	-5.34368	1.41447	-3.77786	0.000158182	0.00878297
Blood_0_Bl-04/Blood_0_control	Blood	Bl-04	0	Rrbp1	70.4441	-1.78727	0.61451	-2.90844	0.00363239	0.0394774
Blood_0_Bl-04/Blood_0_control	Blood	Bl-04	0	Rrm2b	72.5006	-2.21949	0.681597	-3.2563	0.00112873	0.021863
Blood_0_Bl-04/Blood_0_control	Blood	Bl-04	0	Rrn3	44.0667	-2.8033	0.623577	-4.49552	6.94001e-06	0.00193306
Blood_0_Bl-04/Blood_0_control	Blood	Bl-04	0	Rsl24d1	63.9482	-1.982	0.520263	-3.8096	0.000139191	0.00840182
Blood_0_Bl-04/Blood_0_control	Blood	Bl-04	0	Rspry1	140.354	-1.17406	0.402405	-2.91761	0.00352726	0.0391285
Blood_0_Bl-04/Blood_0_control	Blood	Bl-04	0	Rtn4	74.3634	3.48992	0.89713	3.8901	0.000100204	0.00720866
Blood_0_Bl-04/Blood_0_control	Blood	Bl-04	0	Rttn	30.0817	-2.26341	0.665251	-3.40234	0.000668114	0.0170678
Blood_0_Bl-04/Blood_0_control	Blood	Bl-04	0	Runx1t1	70.1886	2.78585	0.752884	3.70023	0.000215402	0.0101872
Blood_0_Bl-04/Blood_0_control	Blood	Bl-04	0	Rwdd1	164.845	-1.78395	0.345787	-5.15909	2.4815e-07	0.000186388
Blood_0_Bl-04/Blood_0_control	Blood	Bl-04	0	Rwdd2b	9.16541	-4.80154	1.37905	-3.48177	0.000498116	0.0151532
Blood_0_Bl-04/Blood_0_control	Blood	Bl-04	0	S100a1	154.158	1.43284	0.50241	2.85192	0.00434555	0.0431048
Blood_0_Bl-04/Blood_0_control	Blood	Bl-04	0	S100a3	4.30059	7.64929	2.33184	3.28037	0.00103672	0.0210854
Blood_0_Bl-04/Blood_0_control	Blood	Bl-04	0	S100a4	258.065	-4.59605	1.28044	-3.58944	0.000331395	0.0124804
Blood_0_Bl-04/Blood_0_control	Blood	Bl-04	0	Saa3	529.157	-5.47854	1.57527	-3.47784	0.000505479	0.0151532
Blood_0_Bl-04/Blood_0_control	Blood	Bl-04	0	Samd14	865.45	3.80539	0.972505	3.91297	9.11664e-05	0.00684761
Blood_0_Bl-04/Blood_0_control	Blood	Bl-04	0	Sat1	452.627	-2.32178	0.834008	-2.78389	0.00537116	0.0484767
Blood_0_Bl-04/Blood_0_control	Blood	Bl-04	0	Sbds	40.0975	-3.28062	0.914953	-3.58556	0.000336359	0.012556
Blood_0_Bl-04/Blood_0_control	Blood	Bl-04	0	Sbf2	54.9056	-2.90969	0.809608	-3.59395	0.000325698	0.012404
Blood_0_Bl-04/Blood_0_control	Blood	Bl-04	0	Sc5d	249.321	-3.55396	1.20266	-2.95508	0.00312587	0.0367493
Blood_0_Bl-04/Blood_0_control	Blood	Bl-04	0	Scai	32.4923	-3.09275	1.01376	-3.05077	0.00228257	0.0312668
Blood_0_Bl-04/Blood_0_control	Blood	Bl-04	0	Scfd2	29.7007	-2.5733	0.58764	-4.37903	1.19206e-05	0.00279145
Blood_0_Bl-04/Blood_0_control	Blood	Bl-04	0	Scgb2b12	7.59271	7.30582	2.45868	2.97144	0.0029641	0.0357355
Blood_0_Bl-04/Blood_0_control	Blood	Bl-04	0	Scly	73.8907	-2.55546	0.873936	-2.92408	0.00345477	0.0386036
Blood_0_Bl-04/Blood_0_control	Blood	Bl-04	0	Scn1b	14.5871	-3.74796	1.20078	-3.12127	0.00180074	0.0274174
Blood_0_Bl-04/Blood_0_control	Blood	Bl-04	0	Sde2	68.3944	-1.78188	0.611457	-2.91416	0.00356652	0.0392864
Blood_0_Bl-04/Blood_0_control	Blood	Bl-04	0	Sdf2l1	131.718	-2.86109	0.739965	-3.86652	0.000110398	0.00746832
Blood_0_Bl-04/Blood_0_control	Blood	Bl-04	0	Sec61b	26.4381	4.4245	1.40074	3.15869	0.00158479	0.0259399
Blood_0_Bl-04/Blood_0_control	Blood	Bl-04	0	Selenon	73.5899	-2.74314	0.817952	-3.35367	0.000797474	0.0184305
Blood_0_Bl-04/Blood_0_control	Blood	Bl-04	0	Selenow	248.952	1.2863	0.418729	3.07192	0.00212683	0.0301097
Blood_0_Bl-04/Blood_0_control	Blood	Bl-04	0	Selp	182.914	-2.83957	0.87711	-3.23742	0.00120616	0.0225864
Blood_0_Bl-04/Blood_0_control	Blood	Bl-04	0	Sema4c	12.4129	4.14735	1.38669	2.99082	0.00278227	0.0345851
Blood_0_Bl-04/Blood_0_control	Blood	Bl-04	0	Serf2	6855.47	1.79692	0.493038	3.6446	0.00026781	0.0113186
Blood_0_Bl-04/Blood_0_control	Blood	Bl-04	0	Serpinb10	222.746	-3.24022	0.932164	-3.47602	0.000508906	0.0151885
Blood_0_Bl-04/Blood_0_control	Blood	Bl-04	0	Serpinb2	95.8061	-4.01001	1.36273	-2.94263	0.00325441	0.037762
Blood_0_Bl-04/Blood_0_control	Blood	Bl-04	0	Serpinb8	24.7975	-6.68852	1.57423	-4.24877	2.14949e-05	0.00351923
Blood_0_Bl-04/Blood_0_control	Blood	Bl-04	0	Sesn3	87.9901	-3.19163	0.743867	-4.2906	1.78193e-05	0.00332162
Blood_0_Bl-04/Blood_0_control	Blood	Bl-04	0	Setd7	25.1241	-2.10214	0.661097	-3.17977	0.00147393	0.0249511
Blood_0_Bl-04/Blood_0_control	Blood	Bl-04	0	Sf3b1	808.699	-1.99986	0.687467	-2.90902	0.00362562	0.0394509
Blood_0_Bl-04/Blood_0_control	Blood	Bl-04	0	Sf3b3	46.925	-5.04997	1.23601	-4.0857	4.39448e-05	0.00516638
Blood_0_Bl-04/Blood_0_control	Blood	Bl-04	0	Sfr1	490.127	-1.70332	0.530644	-3.20992	0.00132772	0.0238018
Blood_0_Bl-04/Blood_0_control	Blood	Bl-04	0	Sgca	9.04512	5.46875	1.75579	3.11469	0.00184137	0.0277181
Blood_0_Bl-04/Blood_0_control	Blood	Bl-04	0	Sgce	23.394	2.50744	0.714945	3.50717	0.000452894	0.0144413
Blood_0_Bl-04/Blood_0_control	Blood	Bl-04	0	Sh2d5	3.58521	5.33097	1.91652	2.78159	0.00540939	0.0487242
Blood_0_Bl-04/Blood_0_control	Blood	Bl-04	0	Sh3bgrl	784.153	1.42952	0.464941	3.07462	0.00210772	0.0299925
Blood_0_Bl-04/Blood_0_control	Blood	Bl-04	0	Sh3bgrl2	33.3467	6.60875	1.83541	3.60069	0.000317375	0.0122949
Blood_0_Bl-04/Blood_0_control	Blood	Bl-04	0	Sh3kbp1	562.308	-1.21596	0.424703	-2.86308	0.00419548	0.0422989
Blood_0_Bl-04/Blood_0_control	Blood	Bl-04	0	Sh3pxd2a	22.0063	-3.90521	1.15694	-3.37546	0.000736924	0.0177082
Blood_0_Bl-04/Blood_0_control	Blood	Bl-04	0	Sh3tc2	37.8706	2.30497	0.591955	3.89383	9.86742e-05	0.00717245
Blood_0_Bl-04/Blood_0_control	Blood	Bl-04	0	Siglecg	91.4221	-3.33266	0.990454	-3.36478	0.00076605	0.0180376
Blood_0_Bl-04/Blood_0_control	Blood	Bl-04	0	Sik2	20.9833	-5.94363	1.41186	-4.20979	2.55608e-05	0.00384214
Blood_0_Bl-04/Blood_0_control	Blood	Bl-04	0	Sike1	255.404	-1.29807	0.34046	-3.8127	0.000137458	0.00837133
Blood_0_Bl-04/Blood_0_control	Blood	Bl-04	0	Sipa1l1	176.718	-1.45549	0.396567	-3.67021	0.000242347	0.0106747
Blood_0_Bl-04/Blood_0_control	Blood	Bl-04	0	Ski	139.384	2.46924	0.843728	2.92658	0.00342712	0.0384386
Blood_0_Bl-04/Blood_0_control	Blood	Bl-04	0	Slc12a9	77.5474	-1.82325	0.569258	-3.20286	0.00136069	0.0240478
Blood_0_Bl-04/Blood_0_control	Blood	Bl-04	0	Slc14a1	129.737	2.05125	0.613173	3.3453	0.000821926	0.018771
Blood_0_Bl-04/Blood_0_control	Blood	Bl-04	0	Slc1a5	56.3228	1.85532	0.591483	3.13672	0.00170849	0.0269217
Blood_0_Bl-04/Blood_0_control	Blood	Bl-04	0	Slc22a3	13.0335	4.37245	1.06469	4.10679	4.01188e-05	0.00493096
Blood_0_Bl-04/Blood_0_control	Blood	Bl-04	0	Slc25a14	51.1925	-1.45012	0.519054	-2.79377	0.00520973	0.0476558
Blood_0_Bl-04/Blood_0_control	Blood	Bl-04	0	Slc25a24	65.7534	-3.20763	0.93754	-3.42132	0.000623173	0.0165981
Blood_0_Bl-04/Blood_0_control	Blood	Bl-04	0	Slc25a36	41.9583	-2.07786	0.619128	-3.3561	0.000790493	0.0183005
Blood_0_Bl-04/Blood_0_control	Blood	Bl-04	0	Slc25a40	29.4354	-1.68703	0.571843	-2.95016	0.00317613	0.0370503
Blood_0_Bl-04/Blood_0_control	Blood	Bl-04	0	Slc25a46	291.443	-1.60584	0.443742	-3.61885	0.000295913	0.0117635
Blood_0_Bl-04/Blood_0_control	Blood	Bl-04	0	Slc30a1	312.557	1.88648	0.50609	3.72755	0.000193351	0.00967735
Blood_0_Bl-04/Blood_0_control	Blood	Bl-04	0	Slc30a3	7.00611	5.99054	1.75028	3.42263	0.000620189	0.0165981
Blood_0_Bl-04/Blood_0_control	Blood	Bl-04	0	Slc35b4	48.8813	-1.77171	0.617893	-2.86734	0.00413938	0.0420309
Blood_0_Bl-04/Blood_0_control	Blood	Bl-04	0	Slc35c2	101.336	-2.73386	0.739717	-3.69582	0.000219182	0.0102184
Blood_0_Bl-04/Blood_0_control	Blood	Bl-04	0	Slc48a1	406.297	5.75482	0.933327	6.16592	7.00756e-10	1.18428e-06
Blood_0_Bl-04/Blood_0_control	Blood	Bl-04	0	Slc4a1	7302.41	2.322	0.685324	3.38818	0.000703574	0.0173996
Blood_0_Bl-04/Blood_0_control	Blood	Bl-04	0	Slf2	5.42131	5.04607	1.76502	2.85894	0.00425066	0.0425875
Blood_0_Bl-04/Blood_0_control	Blood	Bl-04	0	Slfn5	255.114	-1.9607	0.70385	-2.78568	0.00534157	0.0483142
Blood_0_Bl-04/Blood_0_control	Blood	Bl-04	0	Slmap	689.705	1.58876	0.390212	4.07152	4.67078e-05	0.00526241
Blood_0_Bl-04/Blood_0_control	Blood	Bl-04	0	Smad1	55.4532	-2.3203	0.781103	-2.97055	0.00297269	0.0357564
Blood_0_Bl-04/Blood_0_control	Blood	Bl-04	0	Smarca4	143.259	-1.45078	0.458919	-3.16129	0.0015707	0.0258019
Blood_0_Bl-04/Blood_0_control	Blood	Bl-04	0	Smarcc1	275.291	-1.25681	0.356302	-3.52736	0.00041972	0.0138556
Blood_0_Bl-04/Blood_0_control	Blood	Bl-04	0	Smarcc2	11.3874	-4.61242	1.46897	-3.13991	0.00168999	0.0267952
Blood_0_Bl-04/Blood_0_control	Blood	Bl-04	0	Smg9	140.114	-1.20283	0.384563	-3.12778	0.00176132	0.0271357
Blood_0_Bl-04/Blood_0_control	Blood	Bl-04	0	Smim19	124.201	-0.991742	0.326182	-3.04046	0.00236219	0.0319714
Blood_0_Bl-04/Blood_0_control	Blood	Bl-04	0	Smim24	43.7481	2.64321	0.881817	2.99746	0.00272238	0.0342386
Blood_0_Bl-04/Blood_0_control	Blood	Bl-04	0	Smim4	16.2852	2.77248	0.776818	3.56902	0.000358321	0.0128843
Blood_0_Bl-04/Blood_0_control	Blood	Bl-04	0	Smndc1	49.9258	-1.65642	0.551816	-3.00176	0.00268421	0.0339798
Blood_0_Bl-04/Blood_0_control	Blood	Bl-04	0	Smox	2398.44	2.51867	0.6644	3.79089	0.000150108	0.00864708
Blood_0_Bl-04/Blood_0_control	Blood	Bl-04	0	Smpdl3a	607.151	-1.93114	0.695057	-2.77839	0.00546282	0.0489553
Blood_0_Bl-04/Blood_0_control	Blood	Bl-04	0	Smtn	47.3501	2.48781	0.714296	3.48288	0.000496055	0.0151392
Blood_0_Bl-04/Blood_0_control	Blood	Bl-04	0	Snap29	69.117	3.15355	0.670807	4.70114	2.58719e-06	0.00108229
Blood_0_Bl-04/Blood_0_control	Blood	Bl-04	0	Snca	77629.8	1.87647	0.581595	3.22642	0.00125347	0.023039
Blood_0_Bl-04/Blood_0_control	Blood	Bl-04	0	Snrnp25	136.47	2.51103	0.716351	3.50531	0.000456079	0.0144828
Blood_0_Bl-04/Blood_0_control	Blood	Bl-04	0	Snrnp70	243.238	-2.01626	0.711613	-2.83337	0.00460601	0.0447676
Blood_0_Bl-04/Blood_0_control	Blood	Bl-04	0	Snrpc	56.6392	-2.77794	0.762374	-3.64381	0.000268634	0.0113186
Blood_0_Bl-04/Blood_0_control	Blood	Bl-04	0	Snrpf	162.551	-2.55818	0.818722	-3.1246	0.00178047	0.0272241
Blood_0_Bl-04/Blood_0_control	Blood	Bl-04	0	Sntb1	45.8416	2.7161	0.947452	2.86674	0.00414729	0.0420325
Blood_0_Bl-04/Blood_0_control	Blood	Bl-04	0	Snw1	80.0164	-1.36989	0.481543	-2.84479	0.00444405	0.0437608
Blood_0_Bl-04/Blood_0_control	Blood	Bl-04	0	Snx14	145.634	-1.80675	0.520431	-3.47165	0.000517263	0.0152694
Blood_0_Bl-04/Blood_0_control	Blood	Bl-04	0	Snx18	67.8736	1.59253	0.526842	3.02278	0.00250467	0.0328768
Blood_0_Bl-04/Blood_0_control	Blood	Bl-04	0	Snx2	59.8408	-2.38224	0.723834	-3.29114	0.000997826	0.0207662
Blood_0_Bl-04/Blood_0_control	Blood	Bl-04	0	Snx3	129.637	1.3492	0.439781	3.06788	0.00215581	0.0302952
Blood_0_Bl-04/Blood_0_control	Blood	Bl-04	0	Snx6	234.793	-1.88483	0.676742	-2.78515	0.00535028	0.0483528
Blood_0_Bl-04/Blood_0_control	Blood	Bl-04	0	Snx9	54.3074	-1.93461	0.625748	-3.09168	0.0019903	0.0289521
Blood_0_Bl-04/Blood_0_control	Blood	Bl-04	0	Sowaha	105.976	3.60362	0.886269	4.06605	4.78164e-05	0.0052964
Blood_0_Bl-04/Blood_0_control	Blood	Bl-04	0	Spa17	15.6293	2.99599	0.867145	3.455	0.000550294	0.0155773
Blood_0_Bl-04/Blood_0_control	Blood	Bl-04	0	Spag4	5.15429	4.13116	1.42129	2.90663	0.00365346	0.0395475
Blood_0_Bl-04/Blood_0_control	Blood	Bl-04	0	Spag5	236.71	2.16866	0.614861	3.52708	0.000420177	0.0138556
Blood_0_Bl-04/Blood_0_control	Blood	Bl-04	0	Spc24	319.204	2.99067	0.782473	3.82207	0.000132337	0.00826748
Blood_0_Bl-04/Blood_0_control	Blood	Bl-04	0	Specc1	5478.45	3.08416	0.701925	4.39386	1.11355e-05	0.00273731
Blood_0_Bl-04/Blood_0_control	Blood	Bl-04	0	Specc1l	77.7391	-1.44648	0.441381	-3.27717	0.00104853	0.0211735
Blood_0_Bl-04/Blood_0_control	Blood	Bl-04	0	Speer4c	19.92	6.13023	1.86882	3.28026	0.00103712	0.0210854
Blood_0_Bl-04/Blood_0_control	Blood	Bl-04	0	Spin1	157.435	-2.16929	0.477029	-4.5475	5.42865e-06	0.00179013
Blood_0_Bl-04/Blood_0_control	Blood	Bl-04	0	Spin2-ps6	40.5147	4.24161	1.52	2.79053	0.00526217	0.0479088
Blood_0_Bl-04/Blood_0_control	Blood	Bl-04	0	Spin2e	70.2412	4.74095	1.46858	3.22826	0.00124547	0.0230038
Blood_0_Bl-04/Blood_0_control	Blood	Bl-04	0	Spin2f	98.1601	4.10721	1.44264	2.847	0.00441333	0.0435535
Blood_0_Bl-04/Blood_0_control	Blood	Bl-04	0	Spock2	3.64532	4.29867	1.53235	2.80528	0.00502734	0.0466927
Blood_0_Bl-04/Blood_0_control	Blood	Bl-04	0	Spop	1299.45	1.705	0.442192	3.85579	0.000115358	0.00764526
Blood_0_Bl-04/Blood_0_control	Blood	Bl-04	0	Spryd7	28.2888	-3.63792	0.982251	-3.70365	0.000212516	0.0101872
Blood_0_Bl-04/Blood_0_control	Blood	Bl-04	0	Sptan1	106.667	-1.84246	0.479046	-3.8461	0.000120011	0.00786741
Blood_0_Bl-04/Blood_0_control	Blood	Bl-04	0	Sptb	1814.43	2.34872	0.656473	3.57778	0.000346525	0.012731
Blood_0_Bl-04/Blood_0_control	Blood	Bl-04	0	Srbd1	63.3471	8.0432	1.518	5.29855	1.16725e-07	0.000112723
Blood_0_Bl-04/Blood_0_control	Blood	Bl-04	0	Srgap2	203.291	-1.47946	0.485056	-3.05009	0.00228774	0.0312743
Blood_0_Bl-04/Blood_0_control	Blood	Bl-04	0	Srp14	1866.11	1.75432	0.483717	3.62675	0.000287014	0.0115489
Blood_0_Bl-04/Blood_0_control	Blood	Bl-04	0	Srp9	160.308	-1.8468	0.579593	-3.18638	0.00144066	0.0247494
Blood_0_Bl-04/Blood_0_control	Blood	Bl-04	0	Srpk1	63.0616	-1.7048	0.580255	-2.93801	0.00330322	0.0379056
Blood_0_Bl-04/Blood_0_control	Blood	Bl-04	0	Srpk2	54.5546	-2.39198	0.691935	-3.45694	0.000546346	0.0155773
Blood_0_Bl-04/Blood_0_control	Blood	Bl-04	0	Srpk3	32.2779	-2.28585	0.786812	-2.9052	0.00367017	0.0396015
Blood_0_Bl-04/Blood_0_control	Blood	Bl-04	0	Srsf9	372.561	-0.974463	0.334862	-2.91004	0.00361382	0.0394494
Blood_0_Bl-04/Blood_0_control	Blood	Bl-04	0	Ssfa2	35.687	-2.87714	0.848773	-3.38976	0.000699541	0.0173996
Blood_0_Bl-04/Blood_0_control	Blood	Bl-04	0	St3gal5	1596.85	1.85951	0.629656	2.95321	0.00314484	0.0367775
Blood_0_Bl-04/Blood_0_control	Blood	Bl-04	0	St8sia6	27.6514	-4.49618	1.12603	-3.99293	6.52612e-05	0.0059706
Blood_0_Bl-04/Blood_0_control	Blood	Bl-04	0	Stag1	163.192	1.13372	0.401691	2.82238	0.00476692	0.0454012
Blood_0_Bl-04/Blood_0_control	Blood	Bl-04	0	Stbd1	15.5246	4.40567	1.40214	3.1421	0.00167742	0.0267746
Blood_0_Bl-04/Blood_0_control	Blood	Bl-04	0	Stip1	59.3147	-1.9296	0.679903	-2.83805	0.00453895	0.0444589
Blood_0_Bl-04/Blood_0_control	Blood	Bl-04	0	Stk10	474.424	-2.35912	0.798243	-2.9554	0.00312266	0.0367442
Blood_0_Bl-04/Blood_0_control	Blood	Bl-04	0	Stk35	20.9463	-2.31486	0.768045	-3.01397	0.00257854	0.0334206
Blood_0_Bl-04/Blood_0_control	Blood	Bl-04	0	Stk38	130.4	-3.32079	0.974043	-3.40928	0.000651347	0.0170318
Blood_0_Bl-04/Blood_0_control	Blood	Bl-04	0	Strada	7.11117	-4.39643	1.52607	-2.88089	0.00396558	0.0412913
Blood_0_Bl-04/Blood_0_control	Blood	Bl-04	0	Strbp	300.369	-2.66462	0.829301	-3.21309	0.00131315	0.0236717
Blood_0_Bl-04/Blood_0_control	Blood	Bl-04	0	Stx11	1558.09	2.1875	0.620728	3.52408	0.00042495	0.013896
Blood_0_Bl-04/Blood_0_control	Blood	Bl-04	0	Stx7	106.626	-2.85317	1.02425	-2.78563	0.00534243	0.0483142
Blood_0_Bl-04/Blood_0_control	Blood	Bl-04	0	Stxbp1	85.905	3.24032	1.10725	2.92647	0.00342835	0.0384386
Blood_0_Bl-04/Blood_0_control	Blood	Bl-04	0	Suds3	1702.12	1.66758	0.574982	2.90023	0.00372884	0.039846
Blood_0_Bl-04/Blood_0_control	Blood	Bl-04	0	Sugct	20.3281	3.07921	1.10662	2.78255	0.00539342	0.0486127
Blood_0_Bl-04/Blood_0_control	Blood	Bl-04	0	Sugt1	42.9726	-2.90617	0.77079	-3.77038	0.000162999	0.00888606
Blood_0_Bl-04/Blood_0_control	Blood	Bl-04	0	Sult5a1	7.39061	5.86221	1.89737	3.08965	0.00200394	0.0290788
Blood_0_Bl-04/Blood_0_control	Blood	Bl-04	0	Supt20	77.3829	-1.68245	0.567078	-2.96688	0.00300839	0.0359623
Blood_0_Bl-04/Blood_0_control	Blood	Bl-04	0	Surf2	31.6502	-2.49577	0.666205	-3.74625	0.000179497	0.0094428
Blood_0_Bl-04/Blood_0_control	Blood	Bl-04	0	Surf6	55.9694	-2.16271	0.471604	-4.58586	4.52125e-06	0.00160861
Blood_0_Bl-04/Blood_0_control	Blood	Bl-04	0	Syap1	72.6792	-3.0101	1.0262	-2.93327	0.00335415	0.0381397
Blood_0_Bl-04/Blood_0_control	Blood	Bl-04	0	Sytl1	10.3596	-5.2807	1.57011	-3.36327	0.000770247	0.0180481
Blood_0_Bl-04/Blood_0_control	Blood	Bl-04	0	Taar2	3.56445	6.45749	1.90948	3.3818	0.000720129	0.0175976
Blood_0_Bl-04/Blood_0_control	Blood	Bl-04	0	Taf2	54.7532	-2.09753	0.700124	-2.99594	0.00273605	0.0343148
Blood_0_Bl-04/Blood_0_control	Blood	Bl-04	0	Tal1	97.4708	1.9624	0.646703	3.03447	0.00240958	0.0323189
Blood_0_Bl-04/Blood_0_control	Blood	Bl-04	0	Taok2	15.4137	-2.9712	1.04771	-2.8359	0.00456969	0.0446404
Blood_0_Bl-04/Blood_0_control	Blood	Bl-04	0	Tap2	1084.57	3.58969	1.15383	3.11111	0.00186387	0.0279684
Blood_0_Bl-04/Blood_0_control	Blood	Bl-04	0	Tapbp	489.883	2.99899	1.009	2.97224	0.00295633	0.035719
Blood_0_Bl-04/Blood_0_control	Blood	Bl-04	0	Tarbp1	15.5545	-2.16097	0.732851	-2.94872	0.00319092	0.0371587
Blood_0_Bl-04/Blood_0_control	Blood	Bl-04	0	Tardbp	51.6579	-2.82982	0.815081	-3.47182	0.000516943	0.0152694
Blood_0_Bl-04/Blood_0_control	Blood	Bl-04	0	Tatdn2	162.758	-1.61811	0.446917	-3.62061	0.00029391	0.0117217
Blood_0_Bl-04/Blood_0_control	Blood	Bl-04	0	Tbc1d17	152.185	-1.56037	0.554111	-2.81599	0.00486272	0.0459106
Blood_0_Bl-04/Blood_0_control	Blood	Bl-04	0	Tbc1d23	55.4184	-3.03866	0.938402	-3.23813	0.00120318	0.0225744
Blood_0_Bl-04/Blood_0_control	Blood	Bl-04	0	Tbc1d2b	44.7494	3.89769	1.2578	3.09882	0.00194292	0.0286459
Blood_0_Bl-04/Blood_0_control	Blood	Bl-04	0	Tbc1d9	22.0232	-3.6942	1.23065	-3.00184	0.00268356	0.0339798
Blood_0_Bl-04/Blood_0_control	Blood	Bl-04	0	Tbcd	95.7261	3.19296	0.770783	4.14249	3.43555e-05	0.00453411
Blood_0_Bl-04/Blood_0_control	Blood	Bl-04	0	Tbck	28.8635	-3.64292	1.27415	-2.8591	0.00424846	0.0425875
Blood_0_Bl-04/Blood_0_control	Blood	Bl-04	0	Tbrg1	208.303	-2.34669	0.499627	-4.69688	2.64168e-06	0.00108229
Blood_0_Bl-04/Blood_0_control	Blood	Bl-04	0	Tceal9	423.915	2.62125	0.917101	2.85819	0.00426064	0.042638
Blood_0_Bl-04/Blood_0_control	Blood	Bl-04	0	Tcf4	73.0531	-2.24205	0.709975	-3.15792	0.00158897	0.0259768
Blood_0_Bl-04/Blood_0_control	Blood	Bl-04	0	Tdpoz5	8.97913	6.16995	1.7809	3.46451	0.000531205	0.0154641
Blood_0_Bl-04/Blood_0_control	Blood	Bl-04	0	Tecr	116.242	-1.97427	0.681545	-2.89675	0.00377049	0.0400133
Blood_0_Bl-04/Blood_0_control	Blood	Bl-04	0	Tedc2	430.469	3.8422	0.852697	4.50594	6.608e-06	0.00193306
Blood_0_Bl-04/Blood_0_control	Blood	Bl-04	0	Tekt5	6.14949	4.98792	1.51997	3.28159	0.00103223	0.0210854
Blood_0_Bl-04/Blood_0_control	Blood	Bl-04	0	Tex10	66.0246	-1.93762	0.683583	-2.8345	0.00458975	0.0447393
Blood_0_Bl-04/Blood_0_control	Blood	Bl-04	0	Tfb1m	18.2388	-3.16905	0.97933	-3.23594	0.00121243	0.0226723
Blood_0_Bl-04/Blood_0_control	Blood	Bl-04	0	Tfdp1	1198.69	2.09158	0.521441	4.01115	6.04229e-05	0.0058771
Blood_0_Bl-04/Blood_0_control	Blood	Bl-04	0	Tfec	18.1693	-5.03372	1.5348	-3.27972	0.00103911	0.0210942
Blood_0_Bl-04/Blood_0_control	Blood	Bl-04	0	Tgfbr3	11.5699	-3.41825	1.21117	-2.82227	0.00476847	0.0454012
Blood_0_Bl-04/Blood_0_control	Blood	Bl-04	0	Tgfbr3l	4.2741	6.1085	1.93555	3.15595	0.00159978	0.0261221
Blood_0_Bl-04/Blood_0_control	Blood	Bl-04	0	Tgoln1	188.655	-2.64369	0.685492	-3.85663	0.000114959	0.00764526
Blood_0_Bl-04/Blood_0_control	Blood	Bl-04	0	Tgs1	6.19463	-4.75592	1.57966	-3.01072	0.00260633	0.0336634
Blood_0_Bl-04/Blood_0_control	Blood	Bl-04	0	Themis	68.3172	-3.26911	1.12815	-2.89777	0.00375827	0.0399778
Blood_0_Bl-04/Blood_0_control	Blood	Bl-04	0	Thoc1	9.08418	-4.50265	1.40638	-3.20158	0.00136675	0.0241233
Blood_0_Bl-04/Blood_0_control	Blood	Bl-04	0	Thrap3	157.691	-1.38945	0.483028	-2.87654	0.00402059	0.0415267
Blood_0_Bl-04/Blood_0_control	Blood	Bl-04	0	Thyn1	31.845	-3.15207	0.906095	-3.47874	0.000503776	0.0151532
Blood_0_Bl-04/Blood_0_control	Blood	Bl-04	0	Tie1	36.1206	2.14345	0.771778	2.77729	0.00548138	0.0489553
Blood_0_Bl-04/Blood_0_control	Blood	Bl-04	0	Tigd2	61.4073	-2.12171	0.594334	-3.56989	0.000357136	0.0128759
Blood_0_Bl-04/Blood_0_control	Blood	Bl-04	0	Timm8b	840.229	2.80526	0.882365	3.17926	0.00147653	0.0249534
Blood_0_Bl-04/Blood_0_control	Blood	Bl-04	0	Timm9	79.0583	-2.76238	0.914314	-3.02126	0.00251725	0.0329141
Blood_0_Bl-04/Blood_0_control	Blood	Bl-04	0	Tiparp	72.0592	-2.7617	0.891442	-3.09802	0.00194818	0.0286921
Blood_0_Bl-04/Blood_0_control	Blood	Bl-04	0	Tle6	4.28215	5.04774	1.62863	3.09937	0.00193932	0.028624
Blood_0_Bl-04/Blood_0_control	Blood	Bl-04	0	Tln1	3935.05	3.50169	1.16634	3.0023	0.00267947	0.0339798
Blood_0_Bl-04/Blood_0_control	Blood	Bl-04	0	Tlnrd1	6.66761	2.87138	1.00681	2.85197	0.00434494	0.0431048
Blood_0_Bl-04/Blood_0_control	Blood	Bl-04	0	Tlr13	104.811	-3.53047	1.09413	-3.22674	0.00125208	0.023039
Blood_0_Bl-04/Blood_0_control	Blood	Bl-04	0	Tm2d3	154.75	-1.50765	0.501211	-3.00802	0.00262958	0.0337723
Blood_0_Bl-04/Blood_0_control	Blood	Bl-04	0	Tm9sf2	207.762	-2.62001	0.86121	-3.04224	0.00234825	0.031891
Blood_0_Bl-04/Blood_0_control	Blood	Bl-04	0	Tmcc2	1930.86	1.75339	0.611227	2.86864	0.00412239	0.0420226
Blood_0_Bl-04/Blood_0_control	Blood	Bl-04	0	Tmem116	6.68687	3.01742	0.864265	3.49132	0.000480645	0.0149044
Blood_0_Bl-04/Blood_0_control	Blood	Bl-04	0	Tmem140	1314.52	2.26242	0.691313	3.27264	0.00106549	0.0214266
Blood_0_Bl-04/Blood_0_control	Blood	Bl-04	0	Tmem165	75.7544	-3.20963	1.09891	-2.92073	0.00349207	0.0388583
Blood_0_Bl-04/Blood_0_control	Blood	Bl-04	0	Tmem173	26.0745	-5.14424	1.71883	-2.99288	0.00276362	0.0345325
Blood_0_Bl-04/Blood_0_control	Blood	Bl-04	0	Tmem183a	389.294	1.74837	0.413826	4.2249	2.39043e-05	0.00371478
Blood_0_Bl-04/Blood_0_control	Blood	Bl-04	0	Tmem184c	114.139	-1.91134	0.352248	-5.42612	5.75926e-08	7.78652e-05
Blood_0_Bl-04/Blood_0_control	Blood	Bl-04	0	Tmem185b	116.946	-1.29101	0.454917	-2.83789	0.00454125	0.0444589
Blood_0_Bl-04/Blood_0_control	Blood	Bl-04	0	Tmem213	7.85557	7.73013	2.5478	3.03404	0.002413	0.0323189
Blood_0_Bl-04/Blood_0_control	Blood	Bl-04	0	Tmem234	306.171	2.18166	0.64617	3.3763	0.000734688	0.0177058
Blood_0_Bl-04/Blood_0_control	Blood	Bl-04	0	Tmem39a	44.0378	-2.17909	0.65251	-3.33955	0.00083913	0.0190072
Blood_0_Bl-04/Blood_0_control	Blood	Bl-04	0	Tmem60	36.1226	-4.6353	1.65483	-2.80107	0.00509341	0.0469094
Blood_0_Bl-04/Blood_0_control	Blood	Bl-04	0	Tnfaip1	43.4692	-2.57126	0.85097	-3.02156	0.00251478	0.0329141
Blood_0_Bl-04/Blood_0_control	Blood	Bl-04	0	Tnfrsf26	41.3253	-5.19997	1.15824	-4.48955	7.13741e-06	0.00193306
Blood_0_Bl-04/Blood_0_control	Blood	Bl-04	0	Tnfsf12	40.8121	-2.39016	0.765715	-3.12148	0.00179943	0.0274174
Blood_0_Bl-04/Blood_0_control	Blood	Bl-04	0	Tnpo3	18.1724	-2.46822	0.834006	-2.95948	0.00308159	0.0364507
Blood_0_Bl-04/Blood_0_control	Blood	Bl-04	0	Tnrc6a	142.329	-2.48737	0.675644	-3.68148	0.000231885	0.0105204
Blood_0_Bl-04/Blood_0_control	Blood	Bl-04	0	Togaram1	35.4895	-2.64261	0.910743	-2.9016	0.00371261	0.0397869
Blood_0_Bl-04/Blood_0_control	Blood	Bl-04	0	Tollip	35.529	2.05325	0.614151	3.34323	0.000828103	0.0188802
Blood_0_Bl-04/Blood_0_control	Blood	Bl-04	0	Tom1	346.164	2.28705	0.731305	3.12735	0.00176392	0.0271357
Blood_0_Bl-04/Blood_0_control	Blood	Bl-04	0	Tomm20	131.442	-1.33915	0.461801	-2.89985	0.00373346	0.039846
Blood_0_Bl-04/Blood_0_control	Blood	Bl-04	0	Tomm70a	112.665	-1.94167	0.69889	-2.77822	0.00546573	0.0489553
Blood_0_Bl-04/Blood_0_control	Blood	Bl-04	0	Tor1aip2	146.247	4.51756	1.16843	3.86635	0.000110478	0.00746832
Blood_0_Bl-04/Blood_0_control	Blood	Bl-04	0	Tor1b	62.6108	-2.56125	0.658856	-3.88742	0.000101316	0.00722749
Blood_0_Bl-04/Blood_0_control	Blood	Bl-04	0	Tpk1	29.9006	-4.12755	1.21329	-3.40194	0.000669087	0.0170678
Blood_0_Bl-04/Blood_0_control	Blood	Bl-04	0	Tpm4	71.8105	3.05289	0.753006	4.05427	5.02913e-05	0.00535385
Blood_0_Bl-04/Blood_0_control	Blood	Bl-04	0	Tpp1	95.9552	-1.85019	0.561972	-3.29233	0.000993616	0.0207496
Blood_0_Bl-04/Blood_0_control	Blood	Bl-04	0	Tppp	100.627	-3.27028	1.14393	-2.8588	0.00425245	0.0425875
Blood_0_Bl-04/Blood_0_control	Blood	Bl-04	0	Tpsb2	46.1338	-4.96494	1.47573	-3.36439	0.000767133	0.0180376
Blood_0_Bl-04/Blood_0_control	Blood	Bl-04	0	Tpst2	61.7063	2.47186	0.873603	2.8295	0.00466204	0.0451187
Blood_0_Bl-04/Blood_0_control	Blood	Bl-04	0	Tpt1	1526.74	1.8469	0.569564	3.24266	0.00118419	0.0223919
Blood_0_Bl-04/Blood_0_control	Blood	Bl-04	0	Traf2	56.1346	-1.75728	0.469609	-3.742	0.000182561	0.00956677
Blood_0_Bl-04/Blood_0_control	Blood	Bl-04	0	Trak2	3335.35	2.32028	0.539391	4.30166	1.69521e-05	0.00327418
Blood_0_Bl-04/Blood_0_control	Blood	Bl-04	0	Trappc11	254.589	2.57799	0.860284	2.99668	0.00272941	0.0342634
Blood_0_Bl-04/Blood_0_control	Blood	Bl-04	0	Trbv13-1	75.2206	-2.53278	0.893675	-2.83412	0.00459526	0.0447608
Blood_0_Bl-04/Blood_0_control	Blood	Bl-04	0	Triap1	284.34	1.91677	0.539527	3.5527	0.000381304	0.013321
Blood_0_Bl-04/Blood_0_control	Blood	Bl-04	0	Trib1	550.574	3.01173	0.802242	3.75415	0.000173933	0.00922186
Blood_0_Bl-04/Blood_0_control	Blood	Bl-04	0	Trim14	164.116	-1.01096	0.346701	-2.91596	0.00354599	0.0392002
Blood_0_Bl-04/Blood_0_control	Blood	Bl-04	0	Trim34b	13.18	-4.92284	1.56839	-3.13878	0.0016965	0.0267952
Blood_0_Bl-04/Blood_0_control	Blood	Bl-04	0	Trim58	377.649	3.91423	1.08037	3.62304	0.000291156	0.0116808
Blood_0_Bl-04/Blood_0_control	Blood	Bl-04	0	Trmt10a	37.6376	-1.56525	0.534963	-2.92589	0.00343469	0.0384731
Blood_0_Bl-04/Blood_0_control	Blood	Bl-04	0	Trmt10c	19.3068	-5.48172	1.47803	-3.70881	0.000208237	0.0100948
Blood_0_Bl-04/Blood_0_control	Blood	Bl-04	0	Try10	9.38221	19.2883	3.59717	5.36206	8.22788e-08	9.27008e-05
Blood_0_Bl-04/Blood_0_control	Blood	Bl-04	0	Tsc2	107.75	-1.73999	0.620477	-2.80428	0.00504296	0.0466979
Blood_0_Bl-04/Blood_0_control	Blood	Bl-04	0	Tsn	368.994	1.67954	0.579763	2.89694	0.00376827	0.0400133
Blood_0_Bl-04/Blood_0_control	Blood	Bl-04	0	Tspan18	15.2919	2.95119	1.01715	2.90144	0.00371453	0.0397869
Blood_0_Bl-04/Blood_0_control	Blood	Bl-04	0	Tspan2	1005.74	1.6421	0.545684	3.00925	0.00261889	0.0337535
Blood_0_Bl-04/Blood_0_control	Blood	Bl-04	0	Tspan9	91.1969	2.17675	0.641708	3.39212	0.000693528	0.0173996
Blood_0_Bl-04/Blood_0_control	Blood	Bl-04	0	Tspyl1	6934.62	4.87751	1.2272	3.97451	7.05243e-05	0.00603474
Blood_0_Bl-04/Blood_0_control	Blood	Bl-04	0	Tspyl3	41.4611	2.85657	0.970843	2.94236	0.00325725	0.037762
Blood_0_Bl-04/Blood_0_control	Blood	Bl-04	0	Ttc13	60.2471	-2.09105	0.647132	-3.23126	0.00123244	0.0228203
Blood_0_Bl-04/Blood_0_control	Blood	Bl-04	0	Ttc14	322.548	2.41711	0.705869	3.4243	0.000616386	0.0165981
Blood_0_Bl-04/Blood_0_control	Blood	Bl-04	0	Ttc17	158.446	-1.17365	0.32405	-3.62183	0.000292524	0.011701
Blood_0_Bl-04/Blood_0_control	Blood	Bl-04	0	Ttc39b	34.4937	-1.96776	0.666234	-2.95356	0.00314129	0.0367775
Blood_0_Bl-04/Blood_0_control	Blood	Bl-04	0	Ttc5	67.2924	4.78829	1.49412	3.20475	0.00135179	0.0239217
Blood_0_Bl-04/Blood_0_control	Blood	Bl-04	0	Ttl	42.6629	-2.57722	0.731112	-3.52508	0.000423361	0.0138928
Blood_0_Bl-04/Blood_0_control	Blood	Bl-04	0	Tuba1a	50.7582	3.51691	1.17913	2.98262	0.00285788	0.0350622
Blood_0_Bl-04/Blood_0_control	Blood	Bl-04	0	Tuba8	31.6303	2.63901	0.832836	3.16871	0.00153117	0.0254327
Blood_0_Bl-04/Blood_0_control	Blood	Bl-04	0	Tubb2b	162.014	2.74745	0.944499	2.9089	0.00362703	0.0394509
Blood_0_Bl-04/Blood_0_control	Blood	Bl-04	0	Tubg1	59.6311	-2.12486	0.661079	-3.21423	0.00130793	0.0236091
Blood_0_Bl-04/Blood_0_control	Blood	Bl-04	0	Tusc1	10.3482	2.40436	0.766384	3.13728	0.00170522	0.0269014
Blood_0_Bl-04/Blood_0_control	Blood	Bl-04	0	Tusc3	24.0083	-2.75931	0.932054	-2.96046	0.00307182	0.0364308
Blood_0_Bl-04/Blood_0_control	Blood	Bl-04	0	Twsg1	51.3449	-4.08203	1.07841	-3.78523	0.000153564	0.00872349
Blood_0_Bl-04/Blood_0_control	Blood	Bl-04	0	Txlna	71.6265	-2.54148	0.770328	-3.29922	0.000969536	0.0205779
Blood_0_Bl-04/Blood_0_control	Blood	Bl-04	0	Txndc15	34.8387	-3.89027	1.24375	-3.12787	0.00176081	0.0271357
Blood_0_Bl-04/Blood_0_control	Blood	Bl-04	0	Txndc9	369.135	-1.31302	0.419622	-3.12906	0.00175364	0.0271357
Blood_0_Bl-04/Blood_0_control	Blood	Bl-04	0	Txnip	277.899	-1.57821	0.487018	-3.24056	0.00119296	0.0224948
Blood_0_Bl-04/Blood_0_control	Blood	Bl-04	0	U2af2	387.526	-1.63145	0.489407	-3.33352	0.000857533	0.0192589
Blood_0_Bl-04/Blood_0_control	Blood	Bl-04	0	U2surp	959.812	2.39787	0.739347	3.24323	0.00118184	0.0223788
Blood_0_Bl-04/Blood_0_control	Blood	Bl-04	0	Uba3	84.8512	1.48373	0.514389	2.88445	0.00392093	0.0410619
Blood_0_Bl-04/Blood_0_control	Blood	Bl-04	0	Ubac2	82.9793	-1.49319	0.501517	-2.97735	0.00290751	0.0354459
Blood_0_Bl-04/Blood_0_control	Blood	Bl-04	0	Ube2c	699.573	1.67629	0.572811	2.92643	0.00342877	0.0384386
Blood_0_Bl-04/Blood_0_control	Blood	Bl-04	0	Ube2h	85.8603	3.52907	1.10379	3.19724	0.00138749	0.0242991
Blood_0_Bl-04/Blood_0_control	Blood	Bl-04	0	Ube2j2	124.437	-2.12085	0.731993	-2.89736	0.0037632	0.0399988
Blood_0_Bl-04/Blood_0_control	Blood	Bl-04	0	Ube2r2	10209.7	2.47435	0.589368	4.19832	2.68905e-05	0.00390925
Blood_0_Bl-04/Blood_0_control	Blood	Bl-04	0	Ube2s	485.69	2.93522	0.768698	3.81843	0.000134303	0.00826748
Blood_0_Bl-04/Blood_0_control	Blood	Bl-04	0	Ube2v2	132.371	-3.7366	1.0955	-3.41086	0.000647585	0.0170007
Blood_0_Bl-04/Blood_0_control	Blood	Bl-04	0	Ube4b	115.752	-1.61082	0.533852	-3.01736	0.00254987	0.0331802
Blood_0_Bl-04/Blood_0_control	Blood	Bl-04	0	Ubr7	51.8359	-2.51757	0.687704	-3.66084	0.00025139	0.0109248
Blood_0_Bl-04/Blood_0_control	Blood	Bl-04	0	Ubxn4	128.905	-1.57031	0.559782	-2.80521	0.00502845	0.0466927
Blood_0_Bl-04/Blood_0_control	Blood	Bl-04	0	Uchl3	194.123	-1.56311	0.382563	-4.0859	4.39057e-05	0.00516638
Blood_0_Bl-04/Blood_0_control	Blood	Bl-04	0	Uchl5	30.966	-3.64352	1.14025	-3.19537	0.00139651	0.0243624
Blood_0_Bl-04/Blood_0_control	Blood	Bl-04	0	Ufm1	21.023	-3.58541	1.26749	-2.82874	0.00467315	0.0451308
Blood_0_Bl-04/Blood_0_control	Blood	Bl-04	0	Ugdh	398.962	2.37526	0.698311	3.40143	0.000670341	0.0170678
Blood_0_Bl-04/Blood_0_control	Blood	Bl-04	0	Uggt1	277.582	-2.26347	0.637251	-3.55194	0.000382407	0.0133251
Blood_0_Bl-04/Blood_0_control	Blood	Bl-04	0	Ulk4	7.05219	4.91738	1.63496	3.00764	0.00263284	0.0337723
Blood_0_Bl-04/Blood_0_control	Blood	Bl-04	0	Unc119b	23.2866	-2.8101	0.956487	-2.93794	0.00330403	0.0379056
Blood_0_Bl-04/Blood_0_control	Blood	Bl-04	0	Unc93b1	228.201	-2.53858	0.761768	-3.33248	0.000860756	0.0192992
Blood_0_Bl-04/Blood_0_control	Blood	Bl-04	0	Upf3b	311.432	1.36724	0.400619	3.41281	0.000642961	0.0169121
Blood_0_Bl-04/Blood_0_control	Blood	Bl-04	0	Upk1b	15.9374	-4.82665	1.6668	-2.89575	0.00378251	0.0400466
Blood_0_Bl-04/Blood_0_control	Blood	Bl-04	0	Uqcr11	1455.83	4.15572	1.05278	3.94738	7.90097e-05	0.00639647
Blood_0_Bl-04/Blood_0_control	Blood	Bl-04	0	Usp14	47.6719	2.08636	0.57425	3.6332	0.000279932	0.0114613
Blood_0_Bl-04/Blood_0_control	Blood	Bl-04	0	Usp16	207.678	-1.60007	0.50917	-3.14252	0.00167501	0.0267746
Blood_0_Bl-04/Blood_0_control	Blood	Bl-04	0	Usp18	867.571	1.94363	0.49043	3.96312	7.39761e-05	0.00606484
Blood_0_Bl-04/Blood_0_control	Blood	Bl-04	0	Usp25	3648.57	2.02443	0.63773	3.17443	0.00150129	0.0251829
Blood_0_Bl-04/Blood_0_control	Blood	Bl-04	0	Usp34	25.0206	2.1708	0.605606	3.58451	0.000337707	0.012556
Blood_0_Bl-04/Blood_0_control	Blood	Bl-04	0	Usp53	64.8449	-1.7485	0.476458	-3.6698	0.000242743	0.0106747
Blood_0_Bl-04/Blood_0_control	Blood	Bl-04	0	Uspl1	45.4587	-2.14195	0.530114	-4.04055	5.33258e-05	0.00550354
Blood_0_Bl-04/Blood_0_control	Blood	Bl-04	0	Utp23	31.0144	-2.52645	0.725116	-3.4842	0.000493607	0.0151303
Blood_0_Bl-04/Blood_0_control	Blood	Bl-04	0	Uvrag	141.027	-1.78355	0.614026	-2.90468	0.00367623	0.0396299
Blood_0_Bl-04/Blood_0_control	Blood	Bl-04	0	Uxt	46.9386	-2.40363	0.728366	-3.30003	0.000966759	0.0205512
Blood_0_Bl-04/Blood_0_control	Blood	Bl-04	0	Vamp4	24.6985	-3.48988	1.12886	-3.09149	0.00199153	0.0289521
Blood_0_Bl-04/Blood_0_control	Blood	Bl-04	0	Vamp5	25.3925	2.56184	0.725952	3.52894	0.00041723	0.0138556
Blood_0_Bl-04/Blood_0_control	Blood	Bl-04	0	Vamp8	109.007	3.13448	0.799154	3.92225	8.77262e-05	0.00673897
Blood_0_Bl-04/Blood_0_control	Blood	Bl-04	0	Vars2	24.8519	3.51031	1.20485	2.91349	0.00357413	0.0392864
Blood_0_Bl-04/Blood_0_control	Blood	Bl-04	0	Vmn1r103	16.2324	5.34352	1.91006	2.79757	0.00514894	0.0472386
Blood_0_Bl-04/Blood_0_control	Blood	Bl-04	0	Vmn1r149	19.6967	6.20465	1.96686	3.15459	0.00160723	0.0261489
Blood_0_Bl-04/Blood_0_control	Blood	Bl-04	0	Vmn1r151	43.993	5.77486	1.69708	3.40283	0.000666921	0.0170678
Blood_0_Bl-04/Blood_0_control	Blood	Bl-04	0	Vmn1r59	7.92195	7.29547	2.40984	3.02736	0.00246699	0.0325403
Blood_0_Bl-04/Blood_0_control	Blood	Bl-04	0	Vmn2r37	21.9576	5.16726	1.65052	3.13068	0.00174403	0.0271337
Blood_0_Bl-04/Blood_0_control	Blood	Bl-04	0	Vnn3	15.1988	-5.25867	1.63217	-3.22189	0.00127349	0.023173
Blood_0_Bl-04/Blood_0_control	Blood	Bl-04	0	Vps13c	201.868	-2.25351	0.693288	-3.25047	0.00115215	0.0220639
Blood_0_Bl-04/Blood_0_control	Blood	Bl-04	0	Vps29	250.244	-1.56908	0.483768	-3.24346	0.00118088	0.0223788
Blood_0_Bl-04/Blood_0_control	Blood	Bl-04	0	Vps33a	139.759	4.29056	1.17524	3.65079	0.000261439	0.0111856
Blood_0_Bl-04/Blood_0_control	Blood	Bl-04	0	Vps4a	181.046	-1.58998	0.401796	-3.95719	7.58367e-05	0.00617658
Blood_0_Bl-04/Blood_0_control	Blood	Bl-04	0	Vps51	80.3999	-1.13784	0.40343	-2.82041	0.00479625	0.0455054
Blood_0_Bl-04/Blood_0_control	Blood	Bl-04	0	Vrk2	611.451	2.94685	0.65643	4.48921	7.14891e-06	0.00193306
Blood_0_Bl-04/Blood_0_control	Blood	Bl-04	0	Washc4	129.548	-2.82322	0.833922	-3.38547	0.000710564	0.017467
Blood_0_Bl-04/Blood_0_control	Blood	Bl-04	0	Wbp11	246.421	-1.03098	0.29842	-3.45478	0.000550736	0.0155773
Blood_0_Bl-04/Blood_0_control	Blood	Bl-04	0	Wbp1l	338.238	2.65665	0.919013	2.89077	0.00384303	0.0404656
Blood_0_Bl-04/Blood_0_control	Blood	Bl-04	0	Wdfy4	123.279	-2.96361	0.786875	-3.7663	0.000165683	0.00895138
Blood_0_Bl-04/Blood_0_control	Blood	Bl-04	0	Wdr24	5.19771	3.76873	1.08874	3.46155	0.000537066	0.0155152
Blood_0_Bl-04/Blood_0_control	Blood	Bl-04	0	Wdr3	74.1885	-3.46547	0.771289	-4.49309	7.01972e-06	0.00193306
Blood_0_Bl-04/Blood_0_control	Blood	Bl-04	0	Wdr41	16.1691	-2.62279	0.912599	-2.87398	0.00405332	0.0418008
Blood_0_Bl-04/Blood_0_control	Blood	Bl-04	0	Wdr53	32.7655	2.03976	0.678725	3.00528	0.00265333	0.0338744
Blood_0_Bl-04/Blood_0_control	Blood	Bl-04	0	Wdr82	51.8692	-2.40451	0.834312	-2.88203	0.00395119	0.0412673
Blood_0_Bl-04/Blood_0_control	Blood	Bl-04	0	Whamm	41.0314	-3.76791	1.03079	-3.65535	0.00025683	0.0110938
Blood_0_Bl-04/Blood_0_control	Blood	Bl-04	0	Wipi2	448.609	2.04113	0.658516	3.09958	0.00193793	0.028624
Blood_0_Bl-04/Blood_0_control	Blood	Bl-04	0	Wnt2	39.0397	-4.42467	1.44772	-3.0563	0.0022409	0.0309799
Blood_0_Bl-04/Blood_0_control	Blood	Bl-04	0	Wnt2b	16.0049	-4.24934	1.38378	-3.07081	0.00213475	0.0301903
Blood_0_Bl-04/Blood_0_control	Blood	Bl-04	0	Wsb1	191.608	-1.12328	0.336929	-3.33387	0.000856453	0.0192589
Blood_0_Bl-04/Blood_0_control	Blood	Bl-04	0	Wwox	52.2605	-1.71899	0.502499	-3.42089	0.000624162	0.0165981
Blood_0_Bl-04/Blood_0_control	Blood	Bl-04	0	Wwp1	140.536	-2.57754	0.731173	-3.52522	0.000423133	0.0138928
Blood_0_Bl-04/Blood_0_control	Blood	Bl-04	0	Xk	7.35759	3.50306	0.948724	3.69239	0.000222157	0.0103166
Blood_0_Bl-04/Blood_0_control	Blood	Bl-04	0	Xkr6	67.1587	4.34917	1.07062	4.0623	4.85919e-05	0.00529809
Blood_0_Bl-04/Blood_0_control	Blood	Bl-04	0	Xpot	85.5903	2.43757	0.73757	3.30486	0.000950236	0.02036
Blood_0_Bl-04/Blood_0_control	Blood	Bl-04	0	Xrn2	53.5554	-5.50216	1.72452	-3.19054	0.00142008	0.0245513
Blood_0_Bl-04/Blood_0_control	Blood	Bl-04	0	Xylt1	20.2922	-4.1513	1.10325	-3.76278	0.000168036	0.00901528
Blood_0_Bl-04/Blood_0_control	Blood	Bl-04	0	Yae1d1	38.5645	-2.60746	0.811918	-3.21149	0.0013205	0.0237345
Blood_0_Bl-04/Blood_0_control	Blood	Bl-04	0	Yipf5	62.2083	-3.88026	1.14171	-3.39864	0.000677217	0.0172105
Blood_0_Bl-04/Blood_0_control	Blood	Bl-04	0	Ylpm1	119.18	-1.73045	0.419557	-4.12448	3.71576e-05	0.00473935
Blood_0_Bl-04/Blood_0_control	Blood	Bl-04	0	Ypel3	1042.36	2.02292	0.596758	3.38985	0.000699317	0.0173996
Blood_0_Bl-04/Blood_0_control	Blood	Bl-04	0	Ythdf1	94.4827	-0.997478	0.3146	-3.17062	0.00152113	0.0254304
Blood_0_Bl-04/Blood_0_control	Blood	Bl-04	0	Ywhae	80.7189	-3.21354	1.06994	-3.00347	0.00266918	0.0339485
Blood_0_Bl-04/Blood_0_control	Blood	Bl-04	0	Ywhah	517.388	2.10997	0.610941	3.45365	0.00055306	0.0156104
Blood_0_Bl-04/Blood_0_control	Blood	Bl-04	0	Zbtb10	11.5618	-4.28624	1.37059	-3.1273	0.00176422	0.0271357
Blood_0_Bl-04/Blood_0_control	Blood	Bl-04	0	Zbtb38	32.3749	-1.77038	0.631844	-2.80192	0.00507995	0.04688
Blood_0_Bl-04/Blood_0_control	Blood	Bl-04	0	Zbtb6	74.5591	-2.41324	0.82988	-2.90794	0.00363817	0.0395085
Blood_0_Bl-04/Blood_0_control	Blood	Bl-04	0	Zbtb7a	388.232	3.29419	0.972301	3.38803	0.000703962	0.0173996
Blood_0_Bl-04/Blood_0_control	Blood	Bl-04	0	Zbtb8os	150.04	-1.96861	0.578622	-3.40224	0.00066837	0.0170678
Blood_0_Bl-04/Blood_0_control	Blood	Bl-04	0	Zc3h12d	99.367	-2.50313	0.787091	-3.18023	0.00147158	0.0249511
Blood_0_Bl-04/Blood_0_control	Blood	Bl-04	0	Zcchc2	141.436	-1.69173	0.602204	-2.80924	0.00496593	0.0465898
Blood_0_Bl-04/Blood_0_control	Blood	Bl-04	0	Zdhhc19	4.00193	6.44829	2.30569	2.79668	0.00516304	0.047325
Blood_0_Bl-04/Blood_0_control	Blood	Bl-04	0	Zfand3	25.0644	2.42031	0.785116	3.08274	0.00205102	0.0294371
Blood_0_Bl-04/Blood_0_control	Blood	Bl-04	0	Zfp106	289.252	-1.14294	0.411434	-2.77794	0.00547043	0.0489553
Blood_0_Bl-04/Blood_0_control	Blood	Bl-04	0	Zfp131	201.968	3.0118	1.03382	2.91327	0.00357667	0.0392864
Blood_0_Bl-04/Blood_0_control	Blood	Bl-04	0	Zfp157	32.8972	-3.9242	0.982464	-3.99424	6.49028e-05	0.0059706
Blood_0_Bl-04/Blood_0_control	Blood	Bl-04	0	Zfp213	27.6002	-1.96839	0.661789	-2.97434	0.00293616	0.0356305
Blood_0_Bl-04/Blood_0_control	Blood	Bl-04	0	Zfp266	90.3648	-2.2672	0.645326	-3.51326	0.000442643	0.0142489
Blood_0_Bl-04/Blood_0_control	Blood	Bl-04	0	Zfp277	13.1904	-4.79044	1.55832	-3.0741	0.00211138	0.0299925
Blood_0_Bl-04/Blood_0_control	Blood	Bl-04	0	Zfp281	118.524	-2.28153	0.808228	-2.82287	0.00475952	0.0453799
Blood_0_Bl-04/Blood_0_control	Blood	Bl-04	0	Zfp292	100.946	-4.05102	1.13465	-3.57028	0.000356598	0.0128759
Blood_0_Bl-04/Blood_0_control	Blood	Bl-04	0	Zfp317	39.298	-4.40939	1.17976	-3.73753	0.000185837	0.00957135
Blood_0_Bl-04/Blood_0_control	Blood	Bl-04	0	Zfp318	197.724	-1.2147	0.408994	-2.96996	0.00297837	0.0357617
Blood_0_Bl-04/Blood_0_control	Blood	Bl-04	0	Zfp329	18.4471	-4.09355	1.39022	-2.94452	0.00323454	0.0376019
Blood_0_Bl-04/Blood_0_control	Blood	Bl-04	0	Zfp451	173.588	-1.31493	0.391553	-3.35825	0.000784377	0.01819
Blood_0_Bl-04/Blood_0_control	Blood	Bl-04	0	Zfp472	32.7735	-3.12797	1.03524	-3.0215	0.00251524	0.0329141
Blood_0_Bl-04/Blood_0_control	Blood	Bl-04	0	Zfp518a	11.98	-3.54597	1.13752	-3.11728	0.00182526	0.0275418
Blood_0_Bl-04/Blood_0_control	Blood	Bl-04	0	Zfp534	48.1963	5.57021	1.93971	2.87168	0.00408303	0.0419563
Blood_0_Bl-04/Blood_0_control	Blood	Bl-04	0	Zfp563	20.2753	-6.23735	1.43779	-4.33814	1.43695e-05	0.00300209
Blood_0_Bl-04/Blood_0_control	Blood	Bl-04	0	Zfp598	102.038	-1.65645	0.579854	-2.85667	0.0042811	0.0427162
Blood_0_Bl-04/Blood_0_control	Blood	Bl-04	0	Zfp622	75.709	-2.37607	0.71347	-3.33031	0.000867504	0.0194183
Blood_0_Bl-04/Blood_0_control	Blood	Bl-04	0	Zfp68	96.2532	2.21216	0.61509	3.59649	0.000322544	0.0123535
Blood_0_Bl-04/Blood_0_control	Blood	Bl-04	0	Zfp687	16.1029	-4.00925	1.26253	-3.17556	0.00149548	0.0251166
Blood_0_Bl-04/Blood_0_control	Blood	Bl-04	0	Zfp69	12.5322	-1.91784	0.666393	-2.87794	0.00400285	0.0414702
Blood_0_Bl-04/Blood_0_control	Blood	Bl-04	0	Zfp799	32.7037	-1.63546	0.514757	-3.17714	0.00148734	0.0250422
Blood_0_Bl-04/Blood_0_control	Blood	Bl-04	0	Zfp84	122.299	-1.63731	0.463502	-3.53249	0.000411672	0.0138556
Blood_0_Bl-04/Blood_0_control	Blood	Bl-04	0	Zfp91	26.04	4.95253	1.55234	3.19037	0.00142092	0.0245513
Blood_0_Bl-04/Blood_0_control	Blood	Bl-04	0	Zfp93	7.46891	-4.23051	1.50731	-2.80666	0.00500586	0.0466457
Blood_0_Bl-04/Blood_0_control	Blood	Bl-04	0	Zfp933	11.1918	-4.9702	1.30178	-3.81801	0.00013453	0.00826748
Blood_0_Bl-04/Blood_0_control	Blood	Bl-04	0	Zfp942	15.8883	-5.20335	1.822	-2.85585	0.00429221	0.0427955
Blood_0_Bl-04/Blood_0_control	Blood	Bl-04	0	Zfyve26	57.318	1.66486	0.563711	2.95339	0.00314305	0.0367775
Blood_0_Bl-04/Blood_0_control	Blood	Bl-04	0	Zgpat	147.762	-1.11331	0.382581	-2.91	0.00361424	0.0394494
Blood_0_Bl-04/Blood_0_control	Blood	Bl-04	0	Zmym4	13.0112	-5.21762	1.36198	-3.83091	0.000127668	0.00808333
Blood_0_Bl-04/Blood_0_control	Blood	Bl-04	0	Znrf2	154.805	1.67841	0.601287	2.79136	0.00524874	0.0478188
Blood_0_Bl-04/Blood_0_control	Blood	Bl-04	0	Zswim4	31.4447	-2.48611	0.794554	-3.12893	0.00175443	0.0271357
Blood_0_Bl-04/Blood_0_control	Blood	Bl-04	0	Zswim8	38.8321	-1.67303	0.59797	-2.79786	0.00514431	0.0472386
Blood_0_Bl-04/Blood_0_control	Blood	Bl-04	0	Zup1	251.257	-2.16018	0.696186	-3.10287	0.00191651	0.0283803
Blood_0_Bl-04/Blood_0_control	Blood	Bl-04	0	Zw10	101.448	-1.49136	0.370514	-4.0251	5.69499e-05	0.00567386
Blood_0_Bl-04/Blood_0_control	Blood	Bl-04	0	Zyg11b	16.4857	-5.39009	1.4449	-3.73043	0.000191151	0.00964312
Blood_3_Bl-04/Blood_3_control	Blood	Bl-04	3	1110032A03Rik	218.776	1.7393	0.552618	3.14739	0.00164736	0.0323176
Blood_3_Bl-04/Blood_3_control	Blood	Bl-04	3	1500011B03Rik	147.721	-1.67819	0.516238	-3.25081	0.00115075	0.0274347
Blood_3_Bl-04/Blood_3_control	Blood	Bl-04	3	1700017B05Rik	38.6694	1.31253	0.427894	3.06742	0.00215912	0.0380848
Blood_3_Bl-04/Blood_3_control	Blood	Bl-04	3	1700030K09Rik	22.6647	-1.55854	0.496006	-3.14218	0.00167695	0.0325801
Blood_3_Bl-04/Blood_3_control	Blood	Bl-04	3	1700037C18Rik	7.01347	4.32141	1.0284	4.20207	2.64489e-05	0.00379623
Blood_3_Bl-04/Blood_3_control	Blood	Bl-04	3	2310061I04Rik	18.4695	2.14014	0.567911	3.76845	0.000164266	0.00943091
Blood_3_Bl-04/Blood_3_control	Blood	Bl-04	3	2700097O09Rik	42.4399	1.69458	0.498112	3.40201	0.000668916	0.0212801
Blood_3_Bl-04/Blood_3_control	Blood	Bl-04	3	4933415F23Rik	6.80085	3.92894	1.15598	3.3988	0.000676832	0.0214422
Blood_3_Bl-04/Blood_3_control	Blood	Bl-04	3	5830473C10Rik	11.9238	3.9777	1.26105	3.15427	0.00160901	0.0319743
Blood_3_Bl-04/Blood_3_control	Blood	Bl-04	3	9330182L06Rik	23.0459	2.0054	0.61216	3.27594	0.00105312	0.0265469
Blood_3_Bl-04/Blood_3_control	Blood	Bl-04	3	9430038I01Rik	11.8596	2.05116	0.635959	3.2253	0.0012584	0.0287816
Blood_3_Bl-04/Blood_3_control	Blood	Bl-04	3	Aamdc	29.5453	2.3816	0.710854	3.35034	0.000807129	0.0235289
Blood_3_Bl-04/Blood_3_control	Blood	Bl-04	3	Aasdhppt	4.97088	3.35834	0.976715	3.4384	0.000585156	0.0196439
Blood_3_Bl-04/Blood_3_control	Blood	Bl-04	3	Abcf2	2.54909	-3.49362	0.923909	-3.78134	0.000155986	0.00934205
Blood_3_Bl-04/Blood_3_control	Blood	Bl-04	3	Abl2	48.3969	-2.07207	0.497153	-4.16788	3.0745e-05	0.00396751
Blood_3_Bl-04/Blood_3_control	Blood	Bl-04	3	AC140325.1	9.32061	-3.54788	1.17189	-3.02748	0.00246605	0.0417418
Blood_3_Bl-04/Blood_3_control	Blood	Bl-04	3	Acacb	9.92943	5.25701	1.30589	4.02561	5.68275e-05	0.00547491
Blood_3_Bl-04/Blood_3_control	Blood	Bl-04	3	Acd	6.49919	4.35117	0.969252	4.4892	7.1491e-06	0.0018271
Blood_3_Bl-04/Blood_3_control	Blood	Bl-04	3	Acot6	23.4765	2.67495	0.840043	3.18431	0.00145101	0.0304593
Blood_3_Bl-04/Blood_3_control	Blood	Bl-04	3	Acpp	9.80256	3.82122	0.964506	3.96184	7.43734e-05	0.00619015
Blood_3_Bl-04/Blood_3_control	Blood	Bl-04	3	Actb	8719.19	-1.06985	0.357075	-2.99615	0.00273408	0.0434059
Blood_3_Bl-04/Blood_3_control	Blood	Bl-04	3	Actg2	10.0014	3.09658	0.948311	3.26536	0.00109323	0.0269306
Blood_3_Bl-04/Blood_3_control	Blood	Bl-04	3	Acvrl1	15.5939	1.71933	0.544209	3.15933	0.00158134	0.0317759
Blood_3_Bl-04/Blood_3_control	Blood	Bl-04	3	Adgre4	6.635	-3.44358	1.09729	-3.13827	0.0016995	0.0328417
Blood_3_Bl-04/Blood_3_control	Blood	Bl-04	3	Adgrf5	5.82191	3.47316	1.0263	3.38416	0.000713969	0.0221262
Blood_3_Bl-04/Blood_3_control	Blood	Bl-04	3	AEKR01077154.1	13.2787	-1.68956	0.538778	-3.13591	0.00171324	0.0328617
Blood_3_Bl-04/Blood_3_control	Blood	Bl-04	3	Aes	333.17	1.44759	0.453882	3.18936	0.0014259	0.0302584
Blood_3_Bl-04/Blood_3_control	Blood	Bl-04	3	Aff4	273.299	-0.697642	0.231206	-3.0174	0.0025495	0.0421626
Blood_3_Bl-04/Blood_3_control	Blood	Bl-04	3	Agap1	285.486	-1.55858	0.368739	-4.22679	2.37054e-05	0.00353324
Blood_3_Bl-04/Blood_3_control	Blood	Bl-04	3	Ager	26.9516	-3.45715	0.844593	-4.09328	4.25314e-05	0.0047106
Blood_3_Bl-04/Blood_3_control	Blood	Bl-04	3	Agtrap	27.6566	2.08893	0.555955	3.75738	0.000171705	0.00971798
Blood_3_Bl-04/Blood_3_control	Blood	Bl-04	3	Aif1	134.053	-1.86478	0.533679	-3.4942	0.00047548	0.0177403
Blood_3_Bl-04/Blood_3_control	Blood	Bl-04	3	AK157302	61.461	-1.62711	0.529401	-3.0735	0.00211567	0.0375271
Blood_3_Bl-04/Blood_3_control	Blood	Bl-04	3	Akap5	17.2028	4.97897	1.24822	3.98884	6.63958e-05	0.00587373
Blood_3_Bl-04/Blood_3_control	Blood	Bl-04	3	Akirin2	1841.25	-1.45746	0.436116	-3.34191	0.000832043	0.0239826
Blood_3_Bl-04/Blood_3_control	Blood	Bl-04	3	Aldh18a1	16.5577	1.95007	0.538714	3.61986	0.000294764	0.0132043
Blood_3_Bl-04/Blood_3_control	Blood	Bl-04	3	Aldh3b3	37.2522	2.13301	0.670538	3.18104	0.00146747	0.0305799
Blood_3_Bl-04/Blood_3_control	Blood	Bl-04	3	Alkbh2	10.8293	2.02778	0.631995	3.20855	0.00133408	0.0295981
Blood_3_Bl-04/Blood_3_control	Blood	Bl-04	3	Alyref	81.5268	-1.92389	0.547359	-3.51486	0.000439992	0.0171886
Blood_3_Bl-04/Blood_3_control	Blood	Bl-04	3	Amdhd2	99.853	-1.75101	0.553163	-3.16545	0.00154845	0.0315079
Blood_3_Bl-04/Blood_3_control	Blood	Bl-04	3	Amer1	21.1903	2.23954	0.556264	4.02604	5.6724e-05	0.00547491
Blood_3_Bl-04/Blood_3_control	Blood	Bl-04	3	Amigo2	11.1718	3.15603	0.754365	4.18369	2.86819e-05	0.00396751
Blood_3_Bl-04/Blood_3_control	Blood	Bl-04	3	Ammecr1	21.7993	3.70057	0.942826	3.92497	8.67394e-05	0.0067782
Blood_3_Bl-04/Blood_3_control	Blood	Bl-04	3	Amy2a1	1528.76	5.74648	1.54535	3.71856	0.000200362	0.0103613
Blood_3_Bl-04/Blood_3_control	Blood	Bl-04	3	Amy2a4	923.384	6.6905	1.62036	4.12903	3.64289e-05	0.00428935
Blood_3_Bl-04/Blood_3_control	Blood	Bl-04	3	Anapc16	289.569	-2.5416	0.628583	-4.04337	5.2688e-05	0.00533172
Blood_3_Bl-04/Blood_3_control	Blood	Bl-04	3	Anapc5	340.665	1.08073	0.318626	3.39184	0.000694248	0.0217975
Blood_3_Bl-04/Blood_3_control	Blood	Bl-04	3	Anapc7	67.4122	-1.57505	0.41383	-3.80604	0.000141209	0.00896495
Blood_3_Bl-04/Blood_3_control	Blood	Bl-04	3	Angptl2	17.6521	4.1352	0.901751	4.58574	4.52371e-06	0.00136606
Blood_3_Bl-04/Blood_3_control	Blood	Bl-04	3	Ankra2	109.994	1.32994	0.411497	3.23195	0.0012295	0.0284443
Blood_3_Bl-04/Blood_3_control	Blood	Bl-04	3	Ankrd40	70.0397	1.42184	0.456522	3.1145	0.00184259	0.0345571
Blood_3_Bl-04/Blood_3_control	Blood	Bl-04	3	Ankrd44	264.374	-1.32173	0.378499	-3.49204	0.000479345	0.0177612
Blood_3_Bl-04/Blood_3_control	Blood	Bl-04	3	Ankrd49	39.1069	2.02589	0.469265	4.31716	1.58051e-05	0.0029642
Blood_3_Bl-04/Blood_3_control	Blood	Bl-04	3	Ano1	3.01889	-3.82534	1.17116	-3.26629	0.00108966	0.0268989
Blood_3_Bl-04/Blood_3_control	Blood	Bl-04	3	Anp32a	221.591	1.33811	0.410732	3.25788	0.00112248	0.0272691
Blood_3_Bl-04/Blood_3_control	Blood	Bl-04	3	Anxa6	213.872	-2.14148	0.567068	-3.77641	0.000159108	0.00934205
Blood_3_Bl-04/Blood_3_control	Blood	Bl-04	3	Ap1ar	139.653	1.16758	0.387468	3.01336	0.00258371	0.0423024
Blood_3_Bl-04/Blood_3_control	Blood	Bl-04	3	Ap5b1	105.931	-1.78152	0.433121	-4.11322	3.90173e-05	0.0044985
Blood_3_Bl-04/Blood_3_control	Blood	Bl-04	3	Apbb1	12.4353	2.98127	0.799957	3.72678	0.000193939	0.0101949
Blood_3_Bl-04/Blood_3_control	Blood	Bl-04	3	Apex1	100.897	1.3273	0.433699	3.06042	0.00221024	0.0387163
Blood_3_Bl-04/Blood_3_control	Blood	Bl-04	3	Apln	13.218	3.95446	1.01728	3.88729	0.000101368	0.00739513
Blood_3_Bl-04/Blood_3_control	Blood	Bl-04	3	Apobec3	67.843	-1.67045	0.502421	-3.3248	0.000884834	0.0245165
Blood_3_Bl-04/Blood_3_control	Blood	Bl-04	3	Apol11a	1128.85	3.30307	1.02629	3.21847	0.00128877	0.0291095
Blood_3_Bl-04/Blood_3_control	Blood	Bl-04	3	Apoo	49.7202	1.42968	0.453928	3.14957	0.00163509	0.0322117
Blood_3_Bl-04/Blood_3_control	Blood	Bl-04	3	Aqp1	449.739	-1.88705	0.491512	-3.83927	0.000123403	0.00828538
Blood_3_Bl-04/Blood_3_control	Blood	Bl-04	3	Arfip2	42.0681	2.03329	0.470781	4.31896	1.56766e-05	0.0029642
Blood_3_Bl-04/Blood_3_control	Blood	Bl-04	3	Arhgef10l	32.5507	1.53682	0.518104	2.96624	0.00301462	0.0456833
Blood_3_Bl-04/Blood_3_control	Blood	Bl-04	3	Arhgef17	5.4797	3.53397	1.03526	3.41361	0.000641094	0.0208551
Blood_3_Bl-04/Blood_3_control	Blood	Bl-04	3	Arl10	41.5697	-1.59493	0.457317	-3.48758	0.000487405	0.0177612
Blood_3_Bl-04/Blood_3_control	Blood	Bl-04	3	Arl11	60.0036	-1.80547	0.478778	-3.77099	0.000162602	0.00937358
Blood_3_Bl-04/Blood_3_control	Blood	Bl-04	3	Arl14	5.07455	-2.84379	0.955818	-2.97524	0.0029276	0.0449928
Blood_3_Bl-04/Blood_3_control	Blood	Bl-04	3	Arl4d	29.8263	1.7397	0.544447	3.19535	0.00139662	0.0299464
Blood_3_Bl-04/Blood_3_control	Blood	Bl-04	3	Arpp21	19.9176	1.99248	0.631256	3.15637	0.00159747	0.0319631
Blood_3_Bl-04/Blood_3_control	Blood	Bl-04	3	Asb6	32.4364	-1.19854	0.366788	-3.26767	0.00108437	0.0268989
Blood_3_Bl-04/Blood_3_control	Blood	Bl-04	3	Atp10a	11.4082	2.65988	0.785997	3.38409	0.000714155	0.0221262
Blood_3_Bl-04/Blood_3_control	Blood	Bl-04	3	Atp10d	86.4311	1.35373	0.415605	3.25726	0.00112495	0.0272742
Blood_3_Bl-04/Blood_3_control	Blood	Bl-04	3	Atp1a2	9.16083	3.36167	1.13726	2.95595	0.00311706	0.0465843
Blood_3_Bl-04/Blood_3_control	Blood	Bl-04	3	Atp6v0d1	30.8799	1.91723	0.546497	3.50822	0.000451115	0.0172131
Blood_3_Bl-04/Blood_3_control	Blood	Bl-04	3	Atp6v0d2	7.6929	3.11444	1.04148	2.9904	0.00278608	0.0439832
Blood_3_Bl-04/Blood_3_control	Blood	Bl-04	3	Atp6v0e	1146.94	-1.71487	0.457151	-3.75122	0.000175979	0.0097839
Blood_3_Bl-04/Blood_3_control	Blood	Bl-04	3	Atp6v1c2	6.8246	-3.37093	1.11174	-3.03212	0.0024284	0.0412037
Blood_3_Bl-04/Blood_3_control	Blood	Bl-04	3	Atrx	230.804	0.967063	0.281385	3.43679	0.000588649	0.0197141
Blood_3_Bl-04/Blood_3_control	Blood	Bl-04	3	Avil	15.3213	2.92384	0.948996	3.08098	0.0020632	0.0369694
Blood_3_Bl-04/Blood_3_control	Blood	Bl-04	3	Axin1	296.04	-1.8761	0.585923	-3.20196	0.00136496	0.0298473
Blood_3_Bl-04/Blood_3_control	Blood	Bl-04	3	B430305J03Rik	4.39072	-3.36766	1.1162	-3.01707	0.00255228	0.0421626
Blood_3_Bl-04/Blood_3_control	Blood	Bl-04	3	Bach2	179.523	-1.69716	0.484131	-3.50558	0.000455611	0.0172739
Blood_3_Bl-04/Blood_3_control	Blood	Bl-04	3	Bag3	182.097	1.76003	0.439933	4.00068	6.31608e-05	0.00573174
Blood_3_Bl-04/Blood_3_control	Blood	Bl-04	3	BC017158	11.1685	2.2484	0.698784	3.21759	0.00129272	0.0291095
Blood_3_Bl-04/Blood_3_control	Blood	Bl-04	3	BC034090	14.3058	4.52378	1.05837	4.27429	1.91746e-05	0.00313775
Blood_3_Bl-04/Blood_3_control	Blood	Bl-04	3	BC147527	392.853	-2.54814	0.644729	-3.95227	7.74134e-05	0.0062942
Blood_3_Bl-04/Blood_3_control	Blood	Bl-04	3	Bcl2a1a	15.5297	-2.93894	0.881828	-3.33278	0.000859842	0.0241891
Blood_3_Bl-04/Blood_3_control	Blood	Bl-04	3	Bcorl1	164.566	-1.53867	0.517177	-2.97513	0.00292862	0.0449928
Blood_3_Bl-04/Blood_3_control	Blood	Bl-04	3	Bhlhe40	145.383	1.76921	0.580842	3.04594	0.00231955	0.0399829
Blood_3_Bl-04/Blood_3_control	Blood	Bl-04	3	Bivm	50.6575	1.67649	0.408295	4.10606	4.02464e-05	0.00456537
Blood_3_Bl-04/Blood_3_control	Blood	Bl-04	3	Blcap	24.0815	2.79038	0.586128	4.7607	1.92919e-06	0.000921717
Blood_3_Bl-04/Blood_3_control	Blood	Bl-04	3	Blmh	100.605	0.96275	0.285104	3.37684	0.000733244	0.0224702
Blood_3_Bl-04/Blood_3_control	Blood	Bl-04	3	Bmp10	8.73692	4.55208	1.39212	3.26989	0.00107588	0.026832
Blood_3_Bl-04/Blood_3_control	Blood	Bl-04	3	Boc	6.31631	-4.85941	1.16434	-4.17352	2.99924e-05	0.00396751
Blood_3_Bl-04/Blood_3_control	Blood	Bl-04	3	Bptf	311.935	-0.956649	0.26177	-3.65454	0.000257644	0.0124537
Blood_3_Bl-04/Blood_3_control	Blood	Bl-04	3	Brwd1	64.3569	1.31652	0.440548	2.98838	0.00280463	0.0440781
Blood_3_Bl-04/Blood_3_control	Blood	Bl-04	3	Brwd3	91.461	1.2988	0.413096	3.14407	0.00166614	0.0324817
Blood_3_Bl-04/Blood_3_control	Blood	Bl-04	3	Btbd11	3.4599	3.31999	1.04968	3.16286	0.00156226	0.0316542
Blood_3_Bl-04/Blood_3_control	Blood	Bl-04	3	Btbd7	52.0431	2.00698	0.542819	3.69734	0.000217874	0.0111037
Blood_3_Bl-04/Blood_3_control	Blood	Bl-04	3	Btg2	454.684	-1.31331	0.389574	-3.37114	0.00074858	0.0227912
Blood_3_Bl-04/Blood_3_control	Blood	Bl-04	3	Btn1a1	3.93703	-3.83291	1.28121	-2.99163	0.00277489	0.0438557
Blood_3_Bl-04/Blood_3_control	Blood	Bl-04	3	Bud31	23.0343	2.3321	0.610533	3.81977	0.000133575	0.00865839
Blood_3_Bl-04/Blood_3_control	Blood	Bl-04	3	C2cd3	201.337	-1.48514	0.416201	-3.56832	0.000359279	0.0148636
Blood_3_Bl-04/Blood_3_control	Blood	Bl-04	3	Cabyr	5.36872	4.43508	1.33308	3.32694	0.000878054	0.0245054
Blood_3_Bl-04/Blood_3_control	Blood	Bl-04	3	Cacna2d4	3.23928	-5.5149	1.5313	-3.60145	0.000316448	0.0138256
Blood_3_Bl-04/Blood_3_control	Blood	Bl-04	3	Cadps2	15.942	2.14264	0.730384	2.93358	0.00335082	0.0487915
Blood_3_Bl-04/Blood_3_control	Blood	Bl-04	3	Calm3	397.541	-1.3821	0.450882	-3.06532	0.00217438	0.0382311
Blood_3_Bl-04/Blood_3_control	Blood	Bl-04	3	Cant1	72.8298	1.25859	0.43098	2.92031	0.00349683	0.0497814
Blood_3_Bl-04/Blood_3_control	Blood	Bl-04	3	Caprin1	806.225	1.30685	0.433395	3.01537	0.00256665	0.0422252
Blood_3_Bl-04/Blood_3_control	Blood	Bl-04	3	Cast	242.761	0.911993	0.310246	2.93958	0.00328659	0.0481554
Blood_3_Bl-04/Blood_3_control	Blood	Bl-04	3	Catsperg1	8.63674	5.10768	1.07064	4.77068	1.83605e-06	0.000921717
Blood_3_Bl-04/Blood_3_control	Blood	Bl-04	3	Cav2	6.18498	2.41965	0.777159	3.11345	0.00184912	0.0346035
Blood_3_Bl-04/Blood_3_control	Blood	Bl-04	3	Cbfa2t2	91.8716	0.865053	0.296115	2.92134	0.00348528	0.0497629
Blood_3_Bl-04/Blood_3_control	Blood	Bl-04	3	Ccdc130	15.5894	1.70403	0.531295	3.20731	0.00133982	0.0296319
Blood_3_Bl-04/Blood_3_control	Blood	Bl-04	3	Ccdc153	10.4937	3.87908	1.12452	3.44953	0.000561568	0.0192659
Blood_3_Bl-04/Blood_3_control	Blood	Bl-04	3	Ccdc171	64.2086	-1.79901	0.540941	-3.3257	0.000881971	0.0245165
Blood_3_Bl-04/Blood_3_control	Blood	Bl-04	3	Ccdc189	42.6101	-2.30507	0.610253	-3.77724	0.000158578	0.00934205
Blood_3_Bl-04/Blood_3_control	Blood	Bl-04	3	ccdc198	3.66963	-4.38048	1.4495	-3.02207	0.0025105	0.0420891
Blood_3_Bl-04/Blood_3_control	Blood	Bl-04	3	Ccdc22	7.34425	-1.72784	0.55952	-3.08807	0.00201463	0.0363305
Blood_3_Bl-04/Blood_3_control	Blood	Bl-04	3	Ccdc47	266.161	0.949146	0.29771	3.18816	0.00143181	0.0302855
Blood_3_Bl-04/Blood_3_control	Blood	Bl-04	3	Ccdc50	104.732	1.57216	0.522605	3.00832	0.00262694	0.042668
Blood_3_Bl-04/Blood_3_control	Blood	Bl-04	3	Ccdc8	3.68831	-2.69831	0.872805	-3.09154	0.00199119	0.0360544
Blood_3_Bl-04/Blood_3_control	Blood	Bl-04	3	Ccl6	4222.79	-1.83518	0.511189	-3.59001	0.000330661	0.0141801
Blood_3_Bl-04/Blood_3_control	Blood	Bl-04	3	Ccni	989.764	1.22646	0.379623	3.23073	0.00123475	0.0284701
Blood_3_Bl-04/Blood_3_control	Blood	Bl-04	3	Cd2ap	178.044	-2.65815	0.556013	-4.78074	1.74652e-06	0.000921717
Blood_3_Bl-04/Blood_3_control	Blood	Bl-04	3	Cd300lb	61.8942	-1.70165	0.487802	-3.4884	0.000485924	0.0177612
Blood_3_Bl-04/Blood_3_control	Blood	Bl-04	3	Cd320	15.0023	1.9799	0.631131	3.13707	0.00170644	0.0328417
Blood_3_Bl-04/Blood_3_control	Blood	Bl-04	3	Cd59a	164.909	2.41686	0.667847	3.61889	0.000295873	0.0132119
Blood_3_Bl-04/Blood_3_control	Blood	Bl-04	3	Cd72	56.0768	1.92708	0.539951	3.56899	0.000358366	0.0148636
Blood_3_Bl-04/Blood_3_control	Blood	Bl-04	3	Cd74	5423.71	-1.306	0.430497	-3.03371	0.00241563	0.0410861
Blood_3_Bl-04/Blood_3_control	Blood	Bl-04	3	Cd79a	2331.13	-1.60943	0.467817	-3.44031	0.000581058	0.0196439
Blood_3_Bl-04/Blood_3_control	Blood	Bl-04	3	Cd82	62.6851	-2.15797	0.534943	-4.03402	5.48303e-05	0.00539583
Blood_3_Bl-04/Blood_3_control	Blood	Bl-04	3	Cd96	10.9698	3.8268	0.920722	4.1563	3.23436e-05	0.00404169
Blood_3_Bl-04/Blood_3_control	Blood	Bl-04	3	Cdc34	843.497	-1.27116	0.379188	-3.35232	0.000801383	0.0235289
Blood_3_Bl-04/Blood_3_control	Blood	Bl-04	3	Cdc42ep1	11.3853	4.33226	0.907941	4.77152	1.82845e-06	0.000921717
Blood_3_Bl-04/Blood_3_control	Blood	Bl-04	3	Cdc42se1	665.097	-0.939192	0.31769	-2.95632	0.00311338	0.0465843
Blood_3_Bl-04/Blood_3_control	Blood	Bl-04	3	Cdk4	225.556	1.40021	0.432225	3.23955	0.00119719	0.0281061
Blood_3_Bl-04/Blood_3_control	Blood	Bl-04	3	Cdk5rap3	183.613	1.08923	0.325869	3.34255	0.000830118	0.0239763
Blood_3_Bl-04/Blood_3_control	Blood	Bl-04	3	Cdkal1	91.7899	1.0097	0.31804	3.17474	0.00149971	0.0309544
Blood_3_Bl-04/Blood_3_control	Blood	Bl-04	3	Cdkl3	37.2396	2.01353	0.496481	4.0556	5.00053e-05	0.00517187
Blood_3_Bl-04/Blood_3_control	Blood	Bl-04	3	Cdkn2aipnl	89.645	-1.05043	0.353451	-2.97191	0.00295951	0.0451501
Blood_3_Bl-04/Blood_3_control	Blood	Bl-04	3	Cdkn2b	9.94627	3.13318	0.840809	3.72639	0.000194245	0.0101949
Blood_3_Bl-04/Blood_3_control	Blood	Bl-04	3	Cdx2	7.37995	3.35445	0.964754	3.477	0.000507065	0.0182414
Blood_3_Bl-04/Blood_3_control	Blood	Bl-04	3	Cela1	555.586	4.55672	1.2425	3.66737	0.000245058	0.0120104
Blood_3_Bl-04/Blood_3_control	Blood	Bl-04	3	Cept1	1030.09	-1.02107	0.332085	-3.07471	0.00210709	0.0374694
Blood_3_Bl-04/Blood_3_control	Blood	Bl-04	3	Cers4	35.6823	-1.68902	0.562862	-3.00077	0.00269302	0.0430455
Blood_3_Bl-04/Blood_3_control	Blood	Bl-04	3	Cfap57	18.0312	2.64894	0.807708	3.27958	0.00103962	0.0262536
Blood_3_Bl-04/Blood_3_control	Blood	Bl-04	3	Cfap69	2.64499	-4.30154	1.26461	-3.40149	0.000670203	0.0212801
Blood_3_Bl-04/Blood_3_control	Blood	Bl-04	3	Cfap74	4.36545	-5.23071	1.5574	-3.35862	0.000783338	0.0232995
Blood_3_Bl-04/Blood_3_control	Blood	Bl-04	3	Cfp	15.2049	-2.68	0.896579	-2.98913	0.00279769	0.0440183
Blood_3_Bl-04/Blood_3_control	Blood	Bl-04	3	Chd1l	6.77687	2.49483	0.777205	3.21	0.00132735	0.0295721
Blood_3_Bl-04/Blood_3_control	Blood	Bl-04	3	Chek1	25.8646	1.99134	0.520794	3.82367	0.000131481	0.00860189
Blood_3_Bl-04/Blood_3_control	Blood	Bl-04	3	Chmp6	84.2128	1.61323	0.402776	4.00527	6.19475e-05	0.00565814
Blood_3_Bl-04/Blood_3_control	Blood	Bl-04	3	Chpf2	11.7139	-2.90042	0.895457	-3.23904	0.00119934	0.0281061
Blood_3_Bl-04/Blood_3_control	Blood	Bl-04	3	Chst13	10.5941	3.09135	0.880051	3.5127	0.000443585	0.0171886
Blood_3_Bl-04/Blood_3_control	Blood	Bl-04	3	Chst15	47.1074	1.30418	0.419335	3.11011	0.00187015	0.0347498
Blood_3_Bl-04/Blood_3_control	Blood	Bl-04	3	Chsy1	5.4993	-6.83382	1.96163	-3.48375	0.000494439	0.0179247
Blood_3_Bl-04/Blood_3_control	Blood	Bl-04	3	Chtop	331.417	0.621372	0.196937	3.15519	0.00160393	0.0319743
Blood_3_Bl-04/Blood_3_control	Blood	Bl-04	3	Ckap5	21.1513	-1.37856	0.451967	-3.05014	0.00228738	0.0396234
Blood_3_Bl-04/Blood_3_control	Blood	Bl-04	3	Clcn6	7.10707	2.74057	0.811159	3.37859	0.000728588	0.0223762
Blood_3_Bl-04/Blood_3_control	Blood	Bl-04	3	Clic1	1257.67	-1.46262	0.385802	-3.79111	0.000149976	0.00928903
Blood_3_Bl-04/Blood_3_control	Blood	Bl-04	3	Clic4	481.568	1.37502	0.427768	3.21439	0.0013072	0.0293254
Blood_3_Bl-04/Blood_3_control	Blood	Bl-04	3	Clip3	11.3922	3.04752	0.921993	3.30536	0.000948558	0.0252769
Blood_3_Bl-04/Blood_3_control	Blood	Bl-04	3	Clk3	57.0548	-2.94291	0.618375	-4.7591	1.94454e-06	0.000921717
Blood_3_Bl-04/Blood_3_control	Blood	Bl-04	3	Cmc1	65.78	1.35333	0.45302	2.98736	0.00281399	0.0441267
Blood_3_Bl-04/Blood_3_control	Blood	Bl-04	3	Cmc2	11.868	-2.76021	0.649878	-4.24728	2.16382e-05	0.00338182
Blood_3_Bl-04/Blood_3_control	Blood	Bl-04	3	Cmpk2	279.438	-1.15887	0.30576	-3.79013	0.000150569	0.00928903
Blood_3_Bl-04/Blood_3_control	Blood	Bl-04	3	Cmtm8	12.7593	3.01347	0.992307	3.03683	0.00239081	0.0407827
Blood_3_Bl-04/Blood_3_control	Blood	Bl-04	3	Cndp2	314.893	-1.24801	0.405029	-3.08128	0.00206111	0.0369694
Blood_3_Bl-04/Blood_3_control	Blood	Bl-04	3	Cngb1	9.41378	3.7684	1.24816	3.01915	0.00253484	0.0421626
Blood_3_Bl-04/Blood_3_control	Blood	Bl-04	3	Cnn3	212.003	1.49333	0.509431	2.93138	0.00337463	0.0488853
Blood_3_Bl-04/Blood_3_control	Blood	Bl-04	3	Cnnm3	17.8611	2.04397	0.640473	3.19134	0.00141615	0.030185
Blood_3_Bl-04/Blood_3_control	Blood	Bl-04	3	Cnot11	63.17	1.01567	0.32371	3.13758	0.00170348	0.0328417
Blood_3_Bl-04/Blood_3_control	Blood	Bl-04	3	Cntd1	10.3778	-1.51987	0.516331	-2.94359	0.00324425	0.0477838
Blood_3_Bl-04/Blood_3_control	Blood	Bl-04	3	Cntf	3.52081	-2.72327	0.84795	-3.2116	0.00132	0.0294717
Blood_3_Bl-04/Blood_3_control	Blood	Bl-04	3	Cntrl	113.426	-1.6142	0.415345	-3.88641	0.000101736	0.00739513
Blood_3_Bl-04/Blood_3_control	Blood	Bl-04	3	Cog8	50.4179	0.976805	0.287168	3.40151	0.00067015	0.0212801
Blood_3_Bl-04/Blood_3_control	Blood	Bl-04	3	Col20a1	9.25554	3.43801	0.848168	4.05346	5.04655e-05	0.00518137
Blood_3_Bl-04/Blood_3_control	Blood	Bl-04	3	Col4a4	17.1324	4.17881	1.35055	3.09416	0.00197368	0.0360039
Blood_3_Bl-04/Blood_3_control	Blood	Bl-04	3	Cotl1	1997.47	-2.00082	0.487993	-4.10009	4.12995e-05	0.00461046
Blood_3_Bl-04/Blood_3_control	Blood	Bl-04	3	Cox6b1	1345.93	-1.93256	0.492124	-3.92698	8.60202e-05	0.00675955
Blood_3_Bl-04/Blood_3_control	Blood	Bl-04	3	Cox8a	101.991	-2.11716	0.575316	-3.67999	0.000233243	0.0117171
Blood_3_Bl-04/Blood_3_control	Blood	Bl-04	3	Cpa1	424.418	4.68695	1.45888	3.21272	0.00131486	0.0294035
Blood_3_Bl-04/Blood_3_control	Blood	Bl-04	3	Cpa3	17.738	3.00925	1.02752	2.92866	0.00340424	0.0491118
Blood_3_Bl-04/Blood_3_control	Blood	Bl-04	3	Cpb1	806.98	5.25815	1.49128	3.52594	0.000421979	0.0165798
Blood_3_Bl-04/Blood_3_control	Blood	Bl-04	3	Cpeb3	65.7092	-1.93218	0.576578	-3.35112	0.000804848	0.0235289
Blood_3_Bl-04/Blood_3_control	Blood	Bl-04	3	Crb2	4.72885	4.94835	1.55515	3.1819	0.00146312	0.0305501
Blood_3_Bl-04/Blood_3_control	Blood	Bl-04	3	Ctnna1	180.445	0.784694	0.204173	3.84328	0.000121402	0.00821734
Blood_3_Bl-04/Blood_3_control	Blood	Bl-04	3	Ctnnbip1	7.36649	3.43607	1.15346	2.97892	0.00289263	0.0448597
Blood_3_Bl-04/Blood_3_control	Blood	Bl-04	3	Ctrc	252.428	4.46203	1.41079	3.1628	0.00156262	0.0316542
Blood_3_Bl-04/Blood_3_control	Blood	Bl-04	3	Cuta	162.334	0.876121	0.291751	3.00298	0.0026735	0.0429725
Blood_3_Bl-04/Blood_3_control	Blood	Bl-04	3	Cxcl10	36.2488	-2.66198	0.628523	-4.23529	2.28259e-05	0.00345236
Blood_3_Bl-04/Blood_3_control	Blood	Bl-04	3	Cxcl16	30.5647	2.327	0.624856	3.72406	0.000196046	0.0102512
Blood_3_Bl-04/Blood_3_control	Blood	Bl-04	3	Cxcr3	18.3024	2.51722	0.670844	3.75232	0.000175208	0.0097839
Blood_3_Bl-04/Blood_3_control	Blood	Bl-04	3	Cyb561	13.2966	-2.13213	0.653495	-3.26266	0.00110373	0.0270943
Blood_3_Bl-04/Blood_3_control	Blood	Bl-04	3	Cyb5rl	35.5008	2.17422	0.713639	3.04667	0.00231395	0.0399362
Blood_3_Bl-04/Blood_3_control	Blood	Bl-04	3	Cyp2s1	14.2619	-1.90758	0.641205	-2.975	0.00292987	0.0449928
Blood_3_Bl-04/Blood_3_control	Blood	Bl-04	3	Cyp4f18	235.12	-1.84241	0.576445	-3.19616	0.00139272	0.0299083
Blood_3_Bl-04/Blood_3_control	Blood	Bl-04	3	Cyth4	560.546	-1.44057	0.442962	-3.25213	0.00114542	0.0274347
Blood_3_Bl-04/Blood_3_control	Blood	Bl-04	3	D10Wsu102e	34.6476	1.54593	0.517717	2.98606	0.00282602	0.0442659
Blood_3_Bl-04/Blood_3_control	Blood	Bl-04	3	D230025D16Rik	70.7725	1.42776	0.406456	3.5127	0.000443575	0.0171886
Blood_3_Bl-04/Blood_3_control	Blood	Bl-04	3	D7Ertd443e	19.9021	1.93908	0.614955	3.15321	0.00161484	0.031992
Blood_3_Bl-04/Blood_3_control	Blood	Bl-04	3	Dalrd3	62.9626	1.04039	0.316813	3.28394	0.00102368	0.0261327
Blood_3_Bl-04/Blood_3_control	Blood	Bl-04	3	Dapp1	74.8264	-1.82165	0.426258	-4.27358	1.92358e-05	0.00313775
Blood_3_Bl-04/Blood_3_control	Blood	Bl-04	3	Dbp	290.665	2.3836	0.594677	4.00824	6.11737e-05	0.00562398
Blood_3_Bl-04/Blood_3_control	Blood	Bl-04	3	Dcdc2b	6.40705	2.90597	0.907128	3.20348	0.00135775	0.0298473
Blood_3_Bl-04/Blood_3_control	Blood	Bl-04	3	Dclk1	23.2135	2.81457	0.949146	2.96537	0.00302322	0.0456833
Blood_3_Bl-04/Blood_3_control	Blood	Bl-04	3	Dcst1	3.43896	-5.82188	1.94741	-2.98955	0.00279389	0.0440077
Blood_3_Bl-04/Blood_3_control	Blood	Bl-04	3	Ddx23	89.8074	-1.49177	0.394224	-3.78406	0.000154292	0.00934205
Blood_3_Bl-04/Blood_3_control	Blood	Bl-04	3	Ddx50	248.796	1.25805	0.301731	4.16945	3.05338e-05	0.00396751
Blood_3_Bl-04/Blood_3_control	Blood	Bl-04	3	Ddx54	65.0997	-1.92444	0.502181	-3.83217	0.000127018	0.00834875
Blood_3_Bl-04/Blood_3_control	Blood	Bl-04	3	Def8	38.8452	1.37539	0.450735	3.05143	0.00227751	0.0395012
Blood_3_Bl-04/Blood_3_control	Blood	Bl-04	3	Dennd6a	16.9513	-2.18712	0.724873	-3.01724	0.00255088	0.0421626
Blood_3_Bl-04/Blood_3_control	Blood	Bl-04	3	Depdc7	10.312	3.64672	0.892607	4.08547	4.39874e-05	0.00479634
Blood_3_Bl-04/Blood_3_control	Blood	Bl-04	3	Dexi	28.8939	2.57997	0.635125	4.06214	4.86246e-05	0.00514251
Blood_3_Bl-04/Blood_3_control	Blood	Bl-04	3	Dhx36	7.69867	3.61673	0.938939	3.85193	0.000117191	0.00815895
Blood_3_Bl-04/Blood_3_control	Blood	Bl-04	3	Dhx58	6.47742	2.80082	0.91182	3.07167	0.00212862	0.0377092
Blood_3_Bl-04/Blood_3_control	Blood	Bl-04	3	Dip2c	8.67058	2.92005	0.890166	3.28035	0.0010368	0.0262295
Blood_3_Bl-04/Blood_3_control	Blood	Bl-04	3	Dnajc17	13.5919	3.08575	0.817834	3.77308	0.000161244	0.00934205
Blood_3_Bl-04/Blood_3_control	Blood	Bl-04	3	Dnlz	29.7153	2.19767	0.576791	3.81017	0.000138871	0.00887892
Blood_3_Bl-04/Blood_3_control	Blood	Bl-04	3	Dot1l	22.6479	1.75143	0.591655	2.96022	0.00307415	0.04605
Blood_3_Bl-04/Blood_3_control	Blood	Bl-04	3	Dph6	9.14692	2.57659	0.828292	3.11072	0.0018663	0.0347241
Blood_3_Bl-04/Blood_3_control	Blood	Bl-04	3	Dpt	20.2035	2.83437	0.747558	3.7915	0.000149738	0.00928903
Blood_3_Bl-04/Blood_3_control	Blood	Bl-04	3	Dst	57.583	1.8864	0.636051	2.9658	0.00301894	0.0456833
Blood_3_Bl-04/Blood_3_control	Blood	Bl-04	3	Dtx2	199.21	-1.9469	0.617264	-3.15408	0.00161004	0.0319743
Blood_3_Bl-04/Blood_3_control	Blood	Bl-04	3	Dusp19	23.6432	1.9334	0.595391	3.24728	0.00116515	0.0276252
Blood_3_Bl-04/Blood_3_control	Blood	Bl-04	3	Dusp2	7.60841	3.7267	0.950137	3.92228	8.77148e-05	0.00681655
Blood_3_Bl-04/Blood_3_control	Blood	Bl-04	3	Dynlrb1	176.462	1.20288	0.380041	3.16514	0.00155008	0.0315079
Blood_3_Bl-04/Blood_3_control	Blood	Bl-04	3	Ecd	160.989	0.709249	0.218507	3.24588	0.00117086	0.0276331
Blood_3_Bl-04/Blood_3_control	Blood	Bl-04	3	Ecm1	3942.86	-2.10214	0.527284	-3.98673	6.69905e-05	0.0058893
Blood_3_Bl-04/Blood_3_control	Blood	Bl-04	3	Edrf1	82.6995	0.99186	0.26222	3.78255	0.000155231	0.00934205
Blood_3_Bl-04/Blood_3_control	Blood	Bl-04	3	Eef1b2	1468.75	-1.04744	0.285003	-3.67518	0.00023768	0.0118047
Blood_3_Bl-04/Blood_3_control	Blood	Bl-04	3	Egr3	8.52542	3.46182	0.987049	3.50724	0.000452783	0.0172131
Blood_3_Bl-04/Blood_3_control	Blood	Bl-04	3	Ehbp1	27.9885	1.74908	0.588506	2.97206	0.00295809	0.0451501
Blood_3_Bl-04/Blood_3_control	Blood	Bl-04	3	Ehd2	16.1791	3.61206	0.831998	4.34143	1.4156e-05	0.00284455
Blood_3_Bl-04/Blood_3_control	Blood	Bl-04	3	Eif2a	63.3379	1.43073	0.45898	3.11719	0.00182581	0.03438
Blood_3_Bl-04/Blood_3_control	Blood	Bl-04	3	Eif2b1	39.7293	1.42553	0.397643	3.58494	0.000337159	0.014291
Blood_3_Bl-04/Blood_3_control	Blood	Bl-04	3	Eif2s3x	135.758	-1.34211	0.39448	-3.40223	0.00066838	0.0212801
Blood_3_Bl-04/Blood_3_control	Blood	Bl-04	3	Eif4a3	113.598	1.72313	0.452794	3.80555	0.000141491	0.00896495
Blood_3_Bl-04/Blood_3_control	Blood	Bl-04	3	Eif4g2	150.601	1.54137	0.364796	4.22529	2.38631e-05	0.00353324
Blood_3_Bl-04/Blood_3_control	Blood	Bl-04	3	Elac2	97.0549	1.10587	0.359787	3.07367	0.00211446	0.0375271
Blood_3_Bl-04/Blood_3_control	Blood	Bl-04	3	Elof1	89.3439	1.10394	0.321356	3.43526	0.000591992	0.019752
Blood_3_Bl-04/Blood_3_control	Blood	Bl-04	3	Emc2	173.428	-1.31859	0.342749	-3.84711	0.000119519	0.00821734
Blood_3_Bl-04/Blood_3_control	Blood	Bl-04	3	Eml3	23.7748	1.76026	0.51283	3.43244	0.000598174	0.0198441
Blood_3_Bl-04/Blood_3_control	Blood	Bl-04	3	Emp1	46.0755	2.2201	0.744195	2.98322	0.00285233	0.0444799
Blood_3_Bl-04/Blood_3_control	Blood	Bl-04	3	Epc1	71.1254	-1.38588	0.406183	-3.41197	0.000644958	0.0208551
Blood_3_Bl-04/Blood_3_control	Blood	Bl-04	3	Epn1	1369.79	-1.20509	0.364821	-3.30324	0.000955761	0.0252792
Blood_3_Bl-04/Blood_3_control	Blood	Bl-04	3	Epn2	22.3617	2.02958	0.573633	3.53813	0.000402978	0.0161453
Blood_3_Bl-04/Blood_3_control	Blood	Bl-04	3	Eps15l1	166.837	0.87423	0.227742	3.83868	0.000123697	0.00828538
Blood_3_Bl-04/Blood_3_control	Blood	Bl-04	3	Erlin1	33.0002	2.59924	0.680258	3.82095	0.000132936	0.00865687
Blood_3_Bl-04/Blood_3_control	Blood	Bl-04	3	Ero1lb	44.6912	1.63255	0.525251	3.10813	0.00188275	0.0349376
Blood_3_Bl-04/Blood_3_control	Blood	Bl-04	3	Exosc4	38.3488	1.5735	0.48896	3.21805	0.00129065	0.0291095
Blood_3_Bl-04/Blood_3_control	Blood	Bl-04	3	Exosc5	59.5826	1.04674	0.328158	3.18976	0.00142392	0.0302584
Blood_3_Bl-04/Blood_3_control	Blood	Bl-04	3	Fabp4	141.119	-2.63766	0.754045	-3.49802	0.000468725	0.0175816
Blood_3_Bl-04/Blood_3_control	Blood	Bl-04	3	Fahd1	25.9407	3.42935	0.799983	4.28678	1.81284e-05	0.00313775
Blood_3_Bl-04/Blood_3_control	Blood	Bl-04	3	Fam110c	32.3807	2.65137	0.659113	4.02264	5.75505e-05	0.00550684
Blood_3_Bl-04/Blood_3_control	Blood	Bl-04	3	Fam114a1	26.7442	1.50768	0.515787	2.92306	0.00346608	0.0495971
Blood_3_Bl-04/Blood_3_control	Blood	Bl-04	3	Fam122a	76.0823	1.22032	0.347601	3.51068	0.000446969	0.0172131
Blood_3_Bl-04/Blood_3_control	Blood	Bl-04	3	Fam129b	19.0948	2.25977	0.619537	3.6475	0.000264799	0.0125993
Blood_3_Bl-04/Blood_3_control	Blood	Bl-04	3	Fam13a	15.1877	3.04792	0.917385	3.3224	0.000892463	0.0246628
Blood_3_Bl-04/Blood_3_control	Blood	Bl-04	3	Fam207a	274.426	-1.70756	0.52351	-3.26175	0.00110725	0.0271335
Blood_3_Bl-04/Blood_3_control	Blood	Bl-04	3	Fam214a	68.2549	1.69569	0.520361	3.25867	0.00111934	0.0272542
Blood_3_Bl-04/Blood_3_control	Blood	Bl-04	3	Fam84a	9.75334	-2.77547	0.854235	-3.24907	0.00115784	0.0275105
Blood_3_Bl-04/Blood_3_control	Blood	Bl-04	3	Fam84b	11.9959	2.0581	0.68945	2.98514	0.0028345	0.0443494
Blood_3_Bl-04/Blood_3_control	Blood	Bl-04	3	Fastkd5	5.16456	2.79013	0.945801	2.95002	0.00317753	0.0470475
Blood_3_Bl-04/Blood_3_control	Blood	Bl-04	3	Fat4	4.97402	3.63186	1.07414	3.38116	0.000721797	0.0222649
Blood_3_Bl-04/Blood_3_control	Blood	Bl-04	3	Fau	333.591	-0.847695	0.280415	-3.023	0.00250282	0.0420103
Blood_3_Bl-04/Blood_3_control	Blood	Bl-04	3	Fbf1	19.4984	-3.20263	0.666973	-4.80173	1.57299e-06	0.000921717
Blood_3_Bl-04/Blood_3_control	Blood	Bl-04	3	Fbxo34	20.7109	3.31776	0.993806	3.33844	0.0008425	0.0240001
Blood_3_Bl-04/Blood_3_control	Blood	Bl-04	3	Fdx1l	22.516	-1.35608	0.436503	-3.1067	0.00189186	0.0349684
Blood_3_Bl-04/Blood_3_control	Blood	Bl-04	3	Fdxr	12.6867	1.80987	0.619817	2.92001	0.0035002	0.0497814
Blood_3_Bl-04/Blood_3_control	Blood	Bl-04	3	Fer	12.9471	1.88196	0.52498	3.58482	0.00033731	0.014291
Blood_3_Bl-04/Blood_3_control	Blood	Bl-04	3	Fignl2	7.13633	-2.8406	0.90611	-3.13494	0.0017189	0.0328617
Blood_3_Bl-04/Blood_3_control	Blood	Bl-04	3	Fkbp5	178.465	1.39666	0.405152	3.44725	0.00056632	0.0193817
Blood_3_Bl-04/Blood_3_control	Blood	Bl-04	3	Fkbpl	17.0752	1.41391	0.470739	3.00359	0.00266813	0.0429725
Blood_3_Bl-04/Blood_3_control	Blood	Bl-04	3	Flot2	19.5345	-1.73984	0.562856	-3.0911	0.00199419	0.0360544
Blood_3_Bl-04/Blood_3_control	Blood	Bl-04	3	Flvcr1	91.0661	-1.52656	0.42837	-3.56364	0.000365751	0.0150428
Blood_3_Bl-04/Blood_3_control	Blood	Bl-04	3	Fmnl3	6.90811	-2.44238	0.703916	-3.46971	0.000521027	0.0182762
Blood_3_Bl-04/Blood_3_control	Blood	Bl-04	3	Fndc3a	143.457	0.766642	0.234172	3.27383	0.00106099	0.0265638
Blood_3_Bl-04/Blood_3_control	Blood	Bl-04	3	Fndc3b	98.2783	1.045	0.351533	2.9727	0.00295191	0.0451501
Blood_3_Bl-04/Blood_3_control	Blood	Bl-04	3	Fndc4	28.3003	3.56103	1.00028	3.56005	0.000370786	0.0151613
Blood_3_Bl-04/Blood_3_control	Blood	Bl-04	3	Fosl1	12.628	3.69221	1.23006	3.00166	0.00268513	0.0429725
Blood_3_Bl-04/Blood_3_control	Blood	Bl-04	3	Foxa1	30.6217	2.96902	0.931392	3.18772	0.00143398	0.0302859
Blood_3_Bl-04/Blood_3_control	Blood	Bl-04	3	Fpr2	21.0236	2.24764	0.702939	3.19749	0.0013863	0.0299075
Blood_3_Bl-04/Blood_3_control	Blood	Bl-04	3	Frmd4b	66.2698	1.14401	0.362091	3.15945	0.00158065	0.0317759
Blood_3_Bl-04/Blood_3_control	Blood	Bl-04	3	Gabbr2	8.95237	4.12429	1.17817	3.5006	0.000464207	0.0175036
Blood_3_Bl-04/Blood_3_control	Blood	Bl-04	3	Gabpb2	217.061	-0.999106	0.279229	-3.57808	0.000346121	0.0145968
Blood_3_Bl-04/Blood_3_control	Blood	Bl-04	3	Galnt9	20.4063	1.96822	0.622808	3.16023	0.00157644	0.0317759
Blood_3_Bl-04/Blood_3_control	Blood	Bl-04	3	Ganab	62.5005	-1.84816	0.554975	-3.33016	0.000867953	0.02432
Blood_3_Bl-04/Blood_3_control	Blood	Bl-04	3	Gatc	18.5239	1.54205	0.490322	3.14498	0.00166096	0.0324817
Blood_3_Bl-04/Blood_3_control	Blood	Bl-04	3	Gcfc2	4.15976	5.03532	1.38128	3.6454	0.000266971	0.012618
Blood_3_Bl-04/Blood_3_control	Blood	Bl-04	3	Gdpd5	9.31236	2.37997	0.654268	3.63761	0.000275183	0.0128067
Blood_3_Bl-04/Blood_3_control	Blood	Bl-04	3	Gfod1	28.2168	-3.04229	0.699189	-4.35117	1.35414e-05	0.00282424
Blood_3_Bl-04/Blood_3_control	Blood	Bl-04	3	Ggh	13.1587	2.9213	0.811337	3.6006	0.000317479	0.0138256
Blood_3_Bl-04/Blood_3_control	Blood	Bl-04	3	Gid8	22.4556	-2.95885	0.75699	-3.90871	9.27909e-05	0.00701719
Blood_3_Bl-04/Blood_3_control	Blood	Bl-04	3	Gin1	46.4065	1.99558	0.396801	5.02918	4.92586e-07	0.000577392
Blood_3_Bl-04/Blood_3_control	Blood	Bl-04	3	Gipc1	43.4763	1.58713	0.491328	3.23028	0.00123668	0.0284701
Blood_3_Bl-04/Blood_3_control	Blood	Bl-04	3	Gja4	4.16235	6.32575	2.0723	3.05252	0.00226926	0.0394066
Blood_3_Bl-04/Blood_3_control	Blood	Bl-04	3	Gjb5	4.41966	4.38602	1.48404	2.95547	0.00312197	0.0465843
Blood_3_Bl-04/Blood_3_control	Blood	Bl-04	3	Gli1	12.1398	3.652	1.08415	3.36854	0.000755669	0.0228586
Blood_3_Bl-04/Blood_3_control	Blood	Bl-04	3	Glis2	6.00803	3.83964	1.18672	3.23551	0.00121425	0.0282307
Blood_3_Bl-04/Blood_3_control	Blood	Bl-04	3	Glrx2	50.4427	-1.64684	0.520736	-3.16253	0.00156403	0.0316542
Blood_3_Bl-04/Blood_3_control	Blood	Bl-04	3	Glt28d2	8.61408	4.55228	1.35272	3.36527	0.0007647	0.0230821
Blood_3_Bl-04/Blood_3_control	Blood	Bl-04	3	Gm10424	25.2621	-3.8894	0.976435	-3.98327	6.79741e-05	0.00593865
Blood_3_Bl-04/Blood_3_control	Blood	Bl-04	3	Gm10762	10.2464	-1.84546	0.616275	-2.99455	0.00274851	0.0435639
Blood_3_Bl-04/Blood_3_control	Blood	Bl-04	3	Gm10840	5.92456	3.13465	0.959704	3.26627	0.00108974	0.0268989
Blood_3_Bl-04/Blood_3_control	Blood	Bl-04	3	Gm13212	35.4359	2.36666	0.761707	3.10705	0.00188967	0.0349684
Blood_3_Bl-04/Blood_3_control	Blood	Bl-04	3	Gm13305	9.00644	5.06423	1.2117	4.17945	2.92218e-05	0.00396751
Blood_3_Bl-04/Blood_3_control	Blood	Bl-04	3	Gm13694	70.9812	1.63481	0.476018	3.43434	0.000593994	0.019752
Blood_3_Bl-04/Blood_3_control	Blood	Bl-04	3	Gm19426	8.99637	3.28615	1.00781	3.26068	0.00111146	0.0271421
Blood_3_Bl-04/Blood_3_control	Blood	Bl-04	3	Gm21969	36.846	1.78276	0.576378	3.09304	0.00198116	0.0360039
Blood_3_Bl-04/Blood_3_control	Blood	Bl-04	3	Gm27027	3.55389	-2.67855	0.889382	-3.0117	0.00259789	0.042392
Blood_3_Bl-04/Blood_3_control	Blood	Bl-04	3	Gm29427	88.5723	1.04337	0.297287	3.50963	0.000448726	0.0172131
Blood_3_Bl-04/Blood_3_control	Blood	Bl-04	3	Gm29735	5.79288	5.52441	1.51689	3.64193	0.0002706	0.0126875
Blood_3_Bl-04/Blood_3_control	Blood	Bl-04	3	Gm3250	11.6402	2.61757	0.88601	2.95433	0.00313344	0.0466896
Blood_3_Bl-04/Blood_3_control	Blood	Bl-04	3	Gm3550	25.0234	2.79304	0.785591	3.55533	0.000377501	0.0152584
Blood_3_Bl-04/Blood_3_control	Blood	Bl-04	3	Gm45208	204.747	1.45693	0.498241	2.92415	0.00345397	0.0494937
Blood_3_Bl-04/Blood_3_control	Blood	Bl-04	3	Gm4950	2.93887	-3.89457	1.29522	-3.00688	0.00263947	0.0427571
Blood_3_Bl-04/Blood_3_control	Blood	Bl-04	3	Gm5814	66.1729	-3.15704	0.753494	-4.18986	2.79126e-05	0.00392619
Blood_3_Bl-04/Blood_3_control	Blood	Bl-04	3	Gm8237	7.53818	-3.3816	1.06783	-3.16678	0.00154137	0.0314336
Blood_3_Bl-04/Blood_3_control	Blood	Bl-04	3	Gm9046	110.39	1.84854	0.436118	4.23863	2.24886e-05	0.00345236
Blood_3_Bl-04/Blood_3_control	Blood	Bl-04	3	Gmeb2	23.1694	2.05806	0.566807	3.63097	0.000282353	0.0129367
Blood_3_Bl-04/Blood_3_control	Blood	Bl-04	3	Gmfb	7.17676	-2.68146	0.819454	-3.27225	0.00106693	0.0266563
Blood_3_Bl-04/Blood_3_control	Blood	Bl-04	3	Gmfg	938.981	-1.73373	0.438282	-3.95574	7.62977e-05	0.00627604
Blood_3_Bl-04/Blood_3_control	Blood	Bl-04	3	Gnb1	470.698	-0.877531	0.266781	-3.28933	0.00100426	0.0258243
Blood_3_Bl-04/Blood_3_control	Blood	Bl-04	3	Gnb1l	8.63214	6.08357	1.31009	4.64361	3.42367e-06	0.00116056
Blood_3_Bl-04/Blood_3_control	Blood	Bl-04	3	Gng10	61.5241	-1.70553	0.537543	-3.17283	0.00150962	0.0310443
Blood_3_Bl-04/Blood_3_control	Blood	Bl-04	3	Gng7	5.48463	3.58096	1.15695	3.09518	0.00196696	0.035934
Blood_3_Bl-04/Blood_3_control	Blood	Bl-04	3	Gnl1	10.7946	2.16744	0.66796	3.24486	0.00117507	0.0276861
Blood_3_Bl-04/Blood_3_control	Blood	Bl-04	3	Golga3	54.6208	0.898436	0.295746	3.03786	0.00238263	0.0407219
Blood_3_Bl-04/Blood_3_control	Blood	Bl-04	3	Golt1b	32.7878	1.58828	0.500321	3.17452	0.00150085	0.0309544
Blood_3_Bl-04/Blood_3_control	Blood	Bl-04	3	Gp1ba	41.7124	2.2668	0.687531	3.29702	0.000977163	0.0255479
Blood_3_Bl-04/Blood_3_control	Blood	Bl-04	3	Gpatch3	3.00197	-3.66934	1.1735	-3.12683	0.001767	0.0335157
Blood_3_Bl-04/Blood_3_control	Blood	Bl-04	3	Gpatch8	26.791	1.98576	0.555157	3.57694	0.000347641	0.0145968
Blood_3_Bl-04/Blood_3_control	Blood	Bl-04	3	Gpkow	48.1094	-1.39197	0.473373	-2.94053	0.00327655	0.0481085
Blood_3_Bl-04/Blood_3_control	Blood	Bl-04	3	Gpn2	5.3619	-6.14667	1.54879	-3.96869	7.22689e-05	0.00605353
Blood_3_Bl-04/Blood_3_control	Blood	Bl-04	3	Gpr12	7.01469	4.12724	1.28929	3.20118	0.00136866	0.0298473
Blood_3_Bl-04/Blood_3_control	Blood	Bl-04	3	Gpr160	9.41525	2.35322	0.748819	3.14257	0.00167472	0.0325801
Blood_3_Bl-04/Blood_3_control	Blood	Bl-04	3	Gpr174	8.88095	3.42223	1.09453	3.12667	0.001768	0.0335157
Blood_3_Bl-04/Blood_3_control	Blood	Bl-04	3	Gpr19	9.08208	3.11803	0.727782	4.28429	1.83325e-05	0.00313775
Blood_3_Bl-04/Blood_3_control	Blood	Bl-04	3	Gpr88	3.58184	-3.34893	0.920804	-3.63696	0.000275874	0.0128067
Blood_3_Bl-04/Blood_3_control	Blood	Bl-04	3	Gpx2	4.87308	-2.70963	0.901502	-3.00568	0.00264985	0.0428344
Blood_3_Bl-04/Blood_3_control	Blood	Bl-04	3	Grem2	13.6796	3.29158	1.02817	3.20138	0.00136769	0.0298473
Blood_3_Bl-04/Blood_3_control	Blood	Bl-04	3	Grhl2	3.3867	-3.91593	1.20504	-3.24963	0.00115555	0.0275024
Blood_3_Bl-04/Blood_3_control	Blood	Bl-04	3	Gria2	18.4718	-4.03452	1.08188	-3.72919	0.000192096	0.0101949
Blood_3_Bl-04/Blood_3_control	Blood	Bl-04	3	Gsap	182.319	1.04662	0.334614	3.12786	0.00176084	0.0334702
Blood_3_Bl-04/Blood_3_control	Blood	Bl-04	3	Gsta1	13.7115	-3.97732	0.822001	-4.83858	1.3077e-06	0.000919812
Blood_3_Bl-04/Blood_3_control	Blood	Bl-04	3	Gstm5	42.3582	2.32337	0.536499	4.33061	1.48695e-05	0.00294583
Blood_3_Bl-04/Blood_3_control	Blood	Bl-04	3	Gtf3c5	45.8549	-1.36073	0.451039	-3.01689	0.00255385	0.0421626
Blood_3_Bl-04/Blood_3_control	Blood	Bl-04	3	Gys1	14.6292	2.1346	0.635121	3.36093	0.000776802	0.0232479
Blood_3_Bl-04/Blood_3_control	Blood	Bl-04	3	H2al1a	11.3942	-3.56221	0.89643	-3.97378	7.07423e-05	0.00599541
Blood_3_Bl-04/Blood_3_control	Blood	Bl-04	3	Hacd2	28.9078	1.6469	0.521452	3.1583	0.00158693	0.0317974
Blood_3_Bl-04/Blood_3_control	Blood	Bl-04	3	Hadhb	456.84	-1.42081	0.473266	-3.00215	0.00268082	0.0429725
Blood_3_Bl-04/Blood_3_control	Blood	Bl-04	3	Haus2	6.38476	5.59003	1.1516	4.85416	1.209e-06	0.000919812
Blood_3_Bl-04/Blood_3_control	Blood	Bl-04	3	Hba-a2	147517	-2.97752	0.675016	-4.41104	1.02876e-05	0.00226101
Blood_3_Bl-04/Blood_3_control	Blood	Bl-04	3	Hbb-bs	5164.4	-2.21546	0.429496	-5.15829	2.49217e-07	0.000389498
Blood_3_Bl-04/Blood_3_control	Blood	Bl-04	3	Hcst	5.0206	3.40721	1.02909	3.3109	0.000929965	0.0251853
Blood_3_Bl-04/Blood_3_control	Blood	Bl-04	3	Heatr6	5.96173	3.72692	1.04815	3.55571	0.000376963	0.0152584
Blood_3_Bl-04/Blood_3_control	Blood	Bl-04	3	Hebp2	6.77359	3.03379	1.01072	3.00163	0.0026854	0.0429725
Blood_3_Bl-04/Blood_3_control	Blood	Bl-04	3	Hectd2	7.1045	-4.20019	0.934881	-4.49275	7.03084e-06	0.0018271
Blood_3_Bl-04/Blood_3_control	Blood	Bl-04	3	Hgs	86.6058	0.980927	0.312349	3.14048	0.00168672	0.0326796
Blood_3_Bl-04/Blood_3_control	Blood	Bl-04	3	Hhex	144.771	1.24505	0.425372	2.92696	0.00342289	0.049328
Blood_3_Bl-04/Blood_3_control	Blood	Bl-04	3	Hip1r	142.738	1.21995	0.365562	3.33719	0.000846299	0.0240001
Blood_3_Bl-04/Blood_3_control	Blood	Bl-04	3	Hist1h1b	186.667	-2.70725	0.573909	-4.71722	2.3909e-06	0.000966893
Blood_3_Bl-04/Blood_3_control	Blood	Bl-04	3	Hist1h2ao	71.3754	-3.40779	0.722185	-4.71872	2.37334e-06	0.000966893
Blood_3_Bl-04/Blood_3_control	Blood	Bl-04	3	Hist1h3a	436.042	-2.18624	0.511808	-4.2716	1.94074e-05	0.00313775
Blood_3_Bl-04/Blood_3_control	Blood	Bl-04	3	Hist2h2ab	78.5932	1.75241	0.487428	3.59522	0.000324113	0.0139452
Blood_3_Bl-04/Blood_3_control	Blood	Bl-04	3	Hist2h2ac	505.135	-2.38723	0.558352	-4.2755	1.90709e-05	0.00313775
Blood_3_Bl-04/Blood_3_control	Blood	Bl-04	3	Hivep1	231.123	-1.49427	0.400369	-3.73224	0.000189781	0.0101888
Blood_3_Bl-04/Blood_3_control	Blood	Bl-04	3	Hmg20a	265.905	0.806832	0.244551	3.29924	0.00096948	0.0254794
Blood_3_Bl-04/Blood_3_control	Blood	Bl-04	3	Hnrnpa0	1398.43	-1.39635	0.400251	-3.48868	0.000485418	0.0177612
Blood_3_Bl-04/Blood_3_control	Blood	Bl-04	3	Homez	8.5077	-2.38457	0.722288	-3.30141	0.000961995	0.0253873
Blood_3_Bl-04/Blood_3_control	Blood	Bl-04	3	Hoxa5	4.61243	5.12064	1.58307	3.23463	0.001218	0.0282714
Blood_3_Bl-04/Blood_3_control	Blood	Bl-04	3	Hpcal1	212.129	1.04827	0.340466	3.07894	0.00207741	0.0371294
Blood_3_Bl-04/Blood_3_control	Blood	Bl-04	3	Hps4	16.0792	1.87993	0.6369	2.95169	0.00316043	0.0469426
Blood_3_Bl-04/Blood_3_control	Blood	Bl-04	3	Hs6st1	49.8283	2.06072	0.602598	3.41973	0.000626826	0.0206486
Blood_3_Bl-04/Blood_3_control	Blood	Bl-04	3	Hsf4	6.85412	3.0879	0.885906	3.48558	0.000491073	0.0178487
Blood_3_Bl-04/Blood_3_control	Blood	Bl-04	3	Htatip2	126.886	-1.7894	0.561804	-3.18509	0.00144709	0.0304256
Blood_3_Bl-04/Blood_3_control	Blood	Bl-04	3	Htr2c	7.09069	-5.25295	1.59535	-3.29267	0.000992417	0.0257078
Blood_3_Bl-04/Blood_3_control	Blood	Bl-04	3	Hyal2	41.0523	2.32186	0.669129	3.46997	0.00052051	0.0182762
Blood_3_Bl-04/Blood_3_control	Blood	Bl-04	3	Hypk	621.487	1.1379	0.345751	3.2911	0.000997949	0.0257563
Blood_3_Bl-04/Blood_3_control	Blood	Bl-04	3	Iars	137.714	0.734786	0.221265	3.32084	0.000897459	0.0247523
Blood_3_Bl-04/Blood_3_control	Blood	Bl-04	3	Iars2	165.078	1.01115	0.272749	3.70726	0.000209512	0.0107164
Blood_3_Bl-04/Blood_3_control	Blood	Bl-04	3	Idh3b	51.345	1.51731	0.420292	3.61012	0.000306052	0.0135375
Blood_3_Bl-04/Blood_3_control	Blood	Bl-04	3	Ifitm10	3.95085	-3.90866	1.27323	-3.06988	0.00214148	0.0378894
Blood_3_Bl-04/Blood_3_control	Blood	Bl-04	3	Ifna14	2.51166	-5.2892	1.58162	-3.34416	0.000825308	0.0238864
Blood_3_Bl-04/Blood_3_control	Blood	Bl-04	3	Ifna15	9.35783	-4.33492	1.2047	-3.59833	0.000320262	0.0138609
Blood_3_Bl-04/Blood_3_control	Blood	Bl-04	3	Igha	133.379	1.98059	0.578851	3.4216	0.000622546	0.0205557
Blood_3_Bl-04/Blood_3_control	Blood	Bl-04	3	Ighv1-11	6.40548	5.29022	1.18444	4.46643	7.9535e-06	0.00196122
Blood_3_Bl-04/Blood_3_control	Blood	Bl-04	3	Ighv4-1	4.43368	4.67166	1.2149	3.8453	0.000120403	0.00821734
Blood_3_Bl-04/Blood_3_control	Blood	Bl-04	3	Ighv8-5	10.9878	3.11222	0.972775	3.19932	0.00137753	0.0298829
Blood_3_Bl-04/Blood_3_control	Blood	Bl-04	3	Igkv11-125	5.12324	3.49192	0.976792	3.57489	0.000350372	0.0146324
Blood_3_Bl-04/Blood_3_control	Blood	Bl-04	3	Igkv4-51	7.53864	3.39703	1.03151	3.29327	0.000990298	0.0257002
Blood_3_Bl-04/Blood_3_control	Blood	Bl-04	3	Igkv6-29	8.36823	3.7494	1.11637	3.35856	0.000783497	0.0232995
Blood_3_Bl-04/Blood_3_control	Blood	Bl-04	3	Igsf9	16.4008	-1.80708	0.580582	-3.11253	0.0018549	0.0346035
Blood_3_Bl-04/Blood_3_control	Blood	Bl-04	3	Ik	117.738	-1.20242	0.39907	-3.01305	0.00258639	0.0423024
Blood_3_Bl-04/Blood_3_control	Blood	Bl-04	3	Ikzf4	5.71523	4.54561	1.01854	4.46287	8.08691e-06	0.00196122
Blood_3_Bl-04/Blood_3_control	Blood	Bl-04	3	Ikzf5	106.021	1.24893	0.400391	3.11928	0.00181295	0.0341836
Blood_3_Bl-04/Blood_3_control	Blood	Bl-04	3	Il33	10.1072	2.92041	0.904993	3.227	0.00125096	0.0287515
Blood_3_Bl-04/Blood_3_control	Blood	Bl-04	3	Il3ra	17.4473	2.44137	0.645139	3.78426	0.000154167	0.00934205
Blood_3_Bl-04/Blood_3_control	Blood	Bl-04	3	Immt	152.275	0.882045	0.291703	3.02378	0.00249641	0.0419954
Blood_3_Bl-04/Blood_3_control	Blood	Bl-04	3	Ing3	72.8407	1.16324	0.381991	3.04521	0.00232518	0.0399829
Blood_3_Bl-04/Blood_3_control	Blood	Bl-04	3	Insr	66.6955	1.50759	0.507074	2.97312	0.00294786	0.0451501
Blood_3_Bl-04/Blood_3_control	Blood	Bl-04	3	Ints3	35.2165	1.58094	0.36391	4.34432	1.39709e-05	0.00284455
Blood_3_Bl-04/Blood_3_control	Blood	Bl-04	3	Ints9	38.1148	1.9987	0.52932	3.77598	0.000159383	0.00934205
Blood_3_Bl-04/Blood_3_control	Blood	Bl-04	3	Invs	6.63115	2.61194	0.881993	2.9614	0.0030624	0.04605
Blood_3_Bl-04/Blood_3_control	Blood	Bl-04	3	Ipo8	74.1454	1.25372	0.328788	3.81316	0.000137204	0.00881237
Blood_3_Bl-04/Blood_3_control	Blood	Bl-04	3	Iqce	67.3115	0.871638	0.292967	2.97521	0.00292786	0.0449928
Blood_3_Bl-04/Blood_3_control	Blood	Bl-04	3	Irf2bp2	4.94856	-2.44644	0.775714	-3.15379	0.00161167	0.0319743
Blood_3_Bl-04/Blood_3_control	Blood	Bl-04	3	Itga5	8.82285	5.00935	1.04287	4.80344	1.55966e-06	0.000921717
Blood_3_Bl-04/Blood_3_control	Blood	Bl-04	3	Itgal	256.333	-1.35134	0.411886	-3.28087	0.00103488	0.0262281
Blood_3_Bl-04/Blood_3_control	Blood	Bl-04	3	Itgb2	488.592	-1.76459	0.484104	-3.64507	0.000267323	0.012618
Blood_3_Bl-04/Blood_3_control	Blood	Bl-04	3	Itpr1	46.7234	1.78893	0.560995	3.18885	0.00142838	0.0302584
Blood_3_Bl-04/Blood_3_control	Blood	Bl-04	3	Jmy	104.09	-1.96763	0.5473	-3.59516	0.000324191	0.0139452
Blood_3_Bl-04/Blood_3_control	Blood	Bl-04	3	Jtb	135.498	1.19122	0.394591	3.01887	0.0025372	0.0421626
Blood_3_Bl-04/Blood_3_control	Blood	Bl-04	3	Kcmf1	162.003	-1.43712	0.333609	-4.30781	1.6488e-05	0.00297333
Blood_3_Bl-04/Blood_3_control	Blood	Bl-04	3	Kcnd1	4.9606	-4.36669	1.04015	-4.19814	2.69114e-05	0.0038236
Blood_3_Bl-04/Blood_3_control	Blood	Bl-04	3	Kctd12	13.2278	-3.06743	0.835593	-3.67096	0.000241641	0.0118844
Blood_3_Bl-04/Blood_3_control	Blood	Bl-04	3	Kctd7	4.86959	3.34027	1.07978	3.09346	0.0019784	0.0360039
Blood_3_Bl-04/Blood_3_control	Blood	Bl-04	3	Kctd9	44.5078	1.70106	0.501762	3.39017	0.000698494	0.021882
Blood_3_Bl-04/Blood_3_control	Blood	Bl-04	3	Kdf1	6.11242	4.10706	1.24883	3.28874	0.00100637	0.0258315
Blood_3_Bl-04/Blood_3_control	Blood	Bl-04	3	Kdm4b	159.823	1.41055	0.407869	3.45834	0.000543513	0.0189234
Blood_3_Bl-04/Blood_3_control	Blood	Bl-04	3	Kdm7a	22.581	-2.36552	0.681536	-3.47086	0.000518798	0.0182762
Blood_3_Bl-04/Blood_3_control	Blood	Bl-04	3	Khsrp	21.4332	1.56452	0.428386	3.65212	0.000260089	0.0125288
Blood_3_Bl-04/Blood_3_control	Blood	Bl-04	3	Kif13a	7.39053	2.76173	0.863973	3.19655	0.00139084	0.0299083
Blood_3_Bl-04/Blood_3_control	Blood	Bl-04	3	Kif20a	65.8571	1.08334	0.36257	2.98793	0.00280873	0.0440932
Blood_3_Bl-04/Blood_3_control	Blood	Bl-04	3	Klhl13	14.4652	2.51296	0.816526	3.07763	0.00208655	0.0371982
Blood_3_Bl-04/Blood_3_control	Blood	Bl-04	3	Klhl33	10.6138	3.80624	1.00377	3.79193	0.000149479	0.00928903
Blood_3_Bl-04/Blood_3_control	Blood	Bl-04	3	Klk1b21	19.9452	3.56499	1.17103	3.04433	0.00233201	0.0400513
Blood_3_Bl-04/Blood_3_control	Blood	Bl-04	3	Klrg2	6.71612	5.20623	1.40892	3.6952	0.000219715	0.0111571
Blood_3_Bl-04/Blood_3_control	Blood	Bl-04	3	Kmt2b	11.5995	3.99431	0.86328	4.62689	3.71189e-06	0.00118662
[truncated: 59,529 more rows]
