# Supplementary material for: The Effect of Bifidobacterium animalis subsp. lactis Bl-04 on Influenza A Virus Infection in Mice
Source: Microorganisms. 2023 Oct 17;11(10):2582. doi: 10.3390/microorganisms11102582 (PMC10609243; doi:10.3390/microorganisms11102582)
Supplement: Supplementary file 1 [file microorganisms-11-02582-s001.zip › Table S3_pathway-analysis-companion-table.xlsx]

## Sheet: within_timepoint
contrast	tissue	study_day	treatment	path_id	pathNames	totalAcc	totalPert	totalAccNorm	totalPertNorm	pPert	pAcc	pORA	pComb	pPert.fdr	pAcc.fdr	pORA.fdr	pComb.fdr	comparison
Blood_-14_Bl-04/Blood_-14_control	Blood	-14	Bl-04	path:mmu04972	Pancreatic secretion	0	50.2081	-0.407187	-0.407187	0.15942	0.15942	2.61972e-07	2.65462e-06	0.326503	0.195902	1.30986e-06	1.32731e-05	Blood_-14_Bl-04/Blood_-14_control
Blood_-14_Bl-04/Blood_-14_control	Blood	-14	Bl-04	path:mmu04080	Neuroactive ligand-receptor interaction	32.0936	64.1873	2.13786	1.99067	0.0544728	0.0544728	0.000264564	0.000175064	0.272364	0.195902	0.000591196	0.00043766	Blood_-14_Bl-04/Blood_-14_control
Blood_-14_Bl-04/Blood_-14_control	Blood	-14	Bl-04	path:mmu05164	Influenza A	0	32.0936	-0.831347	-0.875052	0.195902	0.195902	0.000354717	0.000734809	0.326503	0.195902	0.000591196	0.00122468	Blood_-14_Bl-04/Blood_-14_control
Blood_-14_Bl-04/Blood_-14_control	Blood	-14	Bl-04	path:mmu04973	Carbohydrate digestion and absorption	0	18.1144	-0.339099	-0.0609537	0.710145	0.103948	0.007659	0.0337988	0.729135	0.195902	0.00957375	0.0422485	Blood_-14_Bl-04/Blood_-14_control
Blood_-14_Bl-04/Blood_-14_control	Blood	-14	Bl-04	path:mmu04970	Salivary secretion	0	18.1144	-0.432665	-0.273957	0.729135	0.177911	0.0125317	0.0520406	0.729135	0.195902	0.0125317	0.0520406	Blood_-14_Bl-04/Blood_-14_control
Blood_-18_Bl-04/Blood_-18_control	Blood	-18	Bl-04	path:mmu04972	Pancreatic secretion	0	14.852	-0.153599	-0.058816	0.764118	0.0514743	0.0256307	0.096612	0.782109	0.102699	0.0430841	0.14794	Blood_-18_Bl-04/Blood_-18_control
Blood_-18_Bl-04/Blood_-18_control	Blood	-18	Bl-04	path:mmu04080	Neuroactive ligand-receptor interaction	14.852	29.704	1.03164	0.49572	0.757121	0.0684658	0.0372926	0.128955	0.782109	0.102699	0.0430841	0.14794	Blood_-18_Bl-04/Blood_-18_control
Blood_-18_Bl-04/Blood_-18_control	Blood	-18	Bl-04	path:mmu05164	Influenza A	0	14.852	-0.383765	-0.296409	0.782109	0.135932	0.0430841	0.14794	0.782109	0.135932	0.0430841	0.14794	Blood_-18_Bl-04/Blood_-18_control
Blood_-20_Bl-04/Blood_-20_control	Blood	-20	Bl-04	path:mmu04080	Neuroactive ligand-receptor interaction	70.1913	140.383	5.27551	5.6998	0.00049975	0.00049975	2.24858e-11	1.12029e-08	0.0029985	0.0029985	6.74574e-11	6.72171e-08	Blood_-20_Bl-04/Blood_-20_control
Blood_-20_Bl-04/Blood_-20_control	Blood	-20	Bl-04	path:mmu05164	Influenza A	0	70.1913	-1.73895	-1.46663	0.131934	0.055972	7.33615e-11	2.2219e-06	0.263868	0.138931	1.46723e-10	6.66569e-06	Blood_-20_Bl-04/Blood_-20_control
Blood_-20_Bl-04/Blood_-20_control	Blood	-20	Bl-04	path:mmu04972	Pancreatic secretion	0	117.04	-0.944696	-0.11402	0.934033	0.163418	6.16256e-26	1.39019e-05	0.934033	0.206897	3.69754e-25	2.78038e-05	Blood_-20_Bl-04/Blood_-20_control
Blood_-20_Bl-04/Blood_-20_control	Blood	-20	Bl-04	path:mmu04961	Endocrine and other factor-regulated calcium reabsorption	37.0263	49.3684	1.6309	1.35192	0.116442	0.0694653	0.00253384	0.00269328	0.263868	0.138931	0.00380075	0.00403992	Blood_-20_Bl-04/Blood_-20_control
Blood_-21_Bl-04/Blood_-21_control	Blood	-21	Bl-04	path:mmu04915	Estrogen signaling pathway	0	21.4418	-0.547115	-0.474327	0.456272	0.150425	0.0340128	0.0801667	0.456272	0.150425	0.0340128	0.0801667	Blood_-21_Bl-04/Blood_-21_control
Blood_0_Bl-04/Blood_0_control	Blood	0	Bl-04	path:mmu04972	Pancreatic secretion	0	175.301	-0.842018	9.47618	0.00149925	0.141429	0.00372212	7.30823e-05	0.16042	0.811459	0.275483	0.0156396	Blood_0_Bl-04/Blood_0_control
Blood_5_Bl-04/Blood_5_control	Blood	5	Bl-04	path:mmu04740	Olfactory transduction	673.033	1016.78	12.0642	12.5254	0.00049975	0.00049975	1.59891e-31	1.12029e-08	0.0527236	0.10045	3.46964e-29	2.3638e-06	Blood_5_Bl-04/Blood_5_control
Blood_7_Bl-04/Blood_7_control	Blood	7	Bl-04	path:mmu04080	Neuroactive ligand-receptor interaction	0	18.1542	-0.668546	-0.668546	0.309345	0.309345	0.00945542	0.0199907	0.618691	0.618691	0.00945542	0.034086	Blood_7_Bl-04/Blood_7_control
Blood_7_Bl-04/Blood_7_control	Blood	7	Bl-04	path:mmu04935	Growth hormone synthesis, secretion and action	36.3083	54.4625	-0.25445	-0.25445	0.78061	0.78061	0.00703825	0.034086	0.78061	0.78061	0.00945542	0.034086	Blood_7_Bl-04/Blood_7_control
Duodenum_-14_Bl-04/Duodenum_-14_control	Duodenum	-14	Bl-04	path:mmu04913	Ovarian steroidogenesis	51.2054	68.2739	10.1362	8.00454	0.00049975	0.00049975	0.0438	0.000256748	0.00524738	0.00666333	0.121715	0.00434699	Duodenum_-14_Bl-04/Duodenum_-14_control
Duodenum_-14_Bl-04/Duodenum_-14_control	Duodenum	-14	Bl-04	path:mmu04929	GnRH secretion	0	17.0685		2.55216	0.00049975		0.0467034	0.00027227	0.00524738		0.121715	0.00434699	Duodenum_-14_Bl-04/Duodenum_-14_control
Duodenum_-14_Bl-04/Duodenum_-14_control	Duodenum	-14	Bl-04	path:mmu04918	Thyroid hormone synthesis	51.2054	68.2739	8.99758	7.14632	0.00049975	0.00049975	0.0539258	0.000310499	0.00524738	0.00666333	0.121715	0.00434699	Duodenum_-14_Bl-04/Duodenum_-14_control
Duodenum_-14_Bl-04/Duodenum_-14_control	Duodenum	-14	Bl-04	path:mmu04923	Regulation of lipolysis in adipocytes	51.2054	68.2739	4.42936	4.19438	0.00249875	0.0049975	0.041617	0.00105771	0.0209895	0.049975	0.121715	0.0102159	Duodenum_-14_Bl-04/Duodenum_-14_control
Duodenum_-14_Bl-04/Duodenum_-14_control	Duodenum	-14	Bl-04	path:mmu04080	Neuroactive ligand-receptor interaction	17.0685	34.1369	5.0242	4.20223	0.00049975	0.00049975	0.242961	0.00121617	0.00524738	0.00666333	0.254262	0.0102159	Duodenum_-14_Bl-04/Duodenum_-14_control
Duodenum_-14_Bl-04/Duodenum_-14_control	Duodenum	-14	Bl-04	path:mmu05320	Autoimmune thyroid disease	0	17.0685	-0.150902	2.28464	0.0089955	0.051974	0.0532059	0.00413743	0.053973	0.225487	0.121715	0.028962	Duodenum_-14_Bl-04/Duodenum_-14_control
Duodenum_-14_Bl-04/Duodenum_-14_control	Duodenum	-14	Bl-04	path:mmu04024	cAMP signaling pathway	49.9253	66.9937	4.81011	4.47162	0.0069965	0.007996	0.151104	0.00830128	0.0489755	0.063968	0.174351	0.0498077	Duodenum_-14_Bl-04/Duodenum_-14_control
Duodenum_-18_Bl-04/Duodenum_-18_control	Duodenum	-18	Bl-04	path:mmu04740	Olfactory transduction	59.9497	89.9245	0.532462	0.665646	0.0434783	0.0434783	0.100946	0.028215	0.0434783	0.0434783	0.100946	0.028215	Duodenum_-18_Bl-04/Duodenum_-18_control
Duodenum_-20_Bl-04/Duodenum_-20_control	Duodenum	-20	Bl-04	path:mmu04740	Olfactory transduction	77.7233	116.585	1.75513	1.77294	0.00249875	0.00249875	0.051814	0.00128849	0.00249875	0.00249875	0.051814	0.00128849	Duodenum_-20_Bl-04/Duodenum_-20_control
Duodenum_-21_Bl-04/Duodenum_-21_control	Duodenum	-21	Bl-04	path:mmu04972	Pancreatic secretion	0	59.8511	-0.403211	-0.772998	0.453273	0.165917	1.13674e-15	7.07413e-06	0.518027	0.209609	9.09389e-15	5.65931e-05	Duodenum_-21_Bl-04/Duodenum_-21_control
Duodenum_-21_Bl-04/Duodenum_-21_control	Duodenum	-21	Bl-04	path:mmu05164	Influenza A	0	24.2125	-0.702869	-0.619067	0.384808	0.12094	0.000177925	0.000725007	0.513077	0.209609	0.000711701	0.00290003	Duodenum_-21_Bl-04/Duodenum_-21_control
Duodenum_-21_Bl-04/Duodenum_-21_control	Duodenum	-21	Bl-04	path:mmu04740	Olfactory transduction	78.375	117.563	3.31986	3.32315	0.00049975	0.00049975	0.525313	0.00242709	0.003998	0.003998	0.525313	0.00647224	Duodenum_-21_Bl-04/Duodenum_-21_control
Duodenum_-21_Bl-04/Duodenum_-21_control	Duodenum	-21	Bl-04	path:mmu04080	Neuroactive ligand-receptor interaction	24.2125	48.425	1.68767	0.728378	0.381809	0.0614693	0.00160606	0.005149	0.513077	0.209609	0.00428284	0.010298	Duodenum_-21_Bl-04/Duodenum_-21_control
Duodenum_0_Bl-04/Duodenum_0_control	Duodenum	0	Bl-04	path:mmu04390	Hippo signaling pathway	339.488	512.761	5.13856	4.7178	0.00049975	0.00049975	3.9984e-06	4.20242e-08	0.0154209	0.0114387	0.000295882	9.07723e-06	Duodenum_0_Bl-04/Duodenum_0_control
Duodenum_0_Bl-04/Duodenum_0_control	Duodenum	0	Bl-04	path:mmu05225	Hepatocellular carcinoma	334.339	500.046	4.77807	3.89871	0.00049975	0.00049975	0.000120357	1.0602e-06	0.0154209	0.0114387	0.00333991	9.8337e-05	Duodenum_0_Bl-04/Duodenum_0_control
Duodenum_0_Bl-04/Duodenum_0_control	Duodenum	0	Bl-04	path:mmu05010	Alzheimer disease	414.449	790.484	6.46868	5.78801	0.00049975	0.00049975	0.000157448	1.36579e-06	0.0154209	0.0114387	0.00388371	9.8337e-05	Duodenum_0_Bl-04/Duodenum_0_control
Duodenum_0_Bl-04/Duodenum_0_control	Duodenum	0	Bl-04	path:mmu04934	Cushing syndrome	317.782	479.467	3.60539	3.23676	0.0049975	0.001999	7.05902e-05	5.5941e-06	0.0771043	0.0374358	0.00223872	0.000302082	Duodenum_0_Bl-04/Duodenum_0_control
Duodenum_0_Bl-04/Duodenum_0_control	Duodenum	0	Bl-04	path:mmu05205	Proteoglycans in cancer	359.804	563.54	3.21352	2.86061	0.007996	0.003998	6.63245e-05	8.19349e-06	0.0909019	0.0549059	0.00223872	0.000322683	Duodenum_0_Bl-04/Duodenum_0_control
Duodenum_0_Bl-04/Duodenum_0_control	Duodenum	0	Bl-04	path:mmu04150	mTOR signaling pathway	398.28	550.35	2.38383	2.29876	0.0249875	0.0229885	2.33635e-05	8.96343e-06	0.234665	0.205897	0.00103734	0.000322683	Duodenum_0_Bl-04/Duodenum_0_control
Duodenum_0_Bl-04/Duodenum_0_control	Duodenum	0	Bl-04	path:mmu04141	Protein processing in endoplasmic reticulum	51.853	265.007	0.0795147	-0.429338	0.691154	0.954023	7.23386e-07	1.04951e-05	0.833152	0.998501	0.000160592	0.000323849	Duodenum_0_Bl-04/Duodenum_0_control
Duodenum_0_Bl-04/Duodenum_0_control	Duodenum	0	Bl-04	path:mmu04916	Melanogenesis	353.317	454.284	3.40774	3.19836	0.00349825	0.00249875	0.000486575	2.4313e-05	0.0629685	0.0428952	0.00900163	0.00059384	Duodenum_0_Bl-04/Duodenum_0_control
Duodenum_0_Bl-04/Duodenum_0_control	Duodenum	0	Bl-04	path:mmu05217	Basal cell carcinoma	297.76	375.518	5.27847	5.32667	0.00049975	0.00049975	0.00347089	2.47433e-05	0.0154209	0.0114387	0.0296104	0.00059384	Duodenum_0_Bl-04/Duodenum_0_control
Duodenum_0_Bl-04/Duodenum_0_control	Duodenum	0	Bl-04	path:mmu05022	Pathways of neurodegeneration - multiple diseases	295.664	756.098	3.44632	2.82923	0.00649675	0.00049975	0.000643989	5.59977e-05	0.0877061	0.0114387	0.0102118	0.0011749	Duodenum_0_Bl-04/Duodenum_0_control
Duodenum_0_Bl-04/Duodenum_0_control	Duodenum	0	Bl-04	path:mmu05224	Breast cancer	419.481	557.931	4.136	3.87805	0.0009995	0.00049975	0.00449668	5.98329e-05	0.023988	0.0114387	0.0332754	0.0011749	Duodenum_0_Bl-04/Duodenum_0_control
Duodenum_0_Bl-04/Duodenum_0_control	Duodenum	0	Bl-04	path:mmu05132	Salmonella infection	238.674	491.759	0.25361	0.0559811	0.96052	0.810595	7.872e-06	9.67266e-05	0.974048	0.998501	0.000436896	0.00174108	Duodenum_0_Bl-04/Duodenum_0_control
Duodenum_0_Bl-04/Duodenum_0_control	Duodenum	0	Bl-04	path:mmu05165	Human papillomavirus infection	418.734	731.931	4.51682	3.87778	0.00049975	0.00049975	0.0321884	0.000193638	0.0154209	0.0114387	0.13233	0.00321737	Duodenum_0_Bl-04/Duodenum_0_control
Duodenum_0_Bl-04/Duodenum_0_control	Duodenum	0	Bl-04	path:mmu05226	Gastric cancer	319.33	446.607	3.4746	2.86589	0.005997	0.001999	0.00401773	0.000280302	0.0863568	0.0374358	0.0307564	0.00432466	Duodenum_0_Bl-04/Duodenum_0_control
Duodenum_0_Bl-04/Duodenum_0_control	Duodenum	0	Bl-04	path:mmu04144	Endocytosis	0	277.681		-2.5895	0.0069965		0.00718132	0.000547591	0.0888967		0.0475791	0.00788532	Duodenum_0_Bl-04/Duodenum_0_control
Duodenum_0_Bl-04/Duodenum_0_control	Duodenum	0	Bl-04	path:mmu03250	Viral life cycle - HIV-1	0	55.1174		-3.47858	0.0009995		0.0598752	0.000641766	0.023988		0.170964	0.00866383	Duodenum_0_Bl-04/Duodenum_0_control
Duodenum_0_Bl-04/Duodenum_0_control	Duodenum	0	Bl-04	path:mmu05034	Alcoholism	156.596	268.285	2.91151	2.15541	0.0324838	0.0089955	0.00276471	0.000926627	0.250589	0.115817	0.0266855	0.0117736	Duodenum_0_Bl-04/Duodenum_0_control
Duodenum_0_Bl-04/Duodenum_0_control	Duodenum	0	Bl-04	path:mmu03015	mRNA surveillance pathway	2.16041	95.4452	0.602553	-3.05171	0.00349825	0.858071	0.0381432	0.00132392	0.0629685	0.998501	0.137913	0.0158871	Duodenum_0_Bl-04/Duodenum_0_control
Duodenum_0_Bl-04/Duodenum_0_control	Duodenum	0	Bl-04	path:mmu04725	Cholinergic synapse	42.5791	145.849	-1.03549	-1.79844	0.065967	0.304848	0.00352221	0.00217648	0.328432	0.816903	0.0296104	0.0235397	Duodenum_0_Bl-04/Duodenum_0_control
Duodenum_0_Bl-04/Duodenum_0_control	Duodenum	0	Bl-04	path:mmu05415	Diabetic cardiomyopathy	30.9418	242.855	-0.924822	-1.29686	0.18091	0.348326	0.0012864	0.0021796	0.508888	0.851445	0.0163976	0.0235397	Duodenum_0_Bl-04/Duodenum_0_control
Duodenum_0_Bl-04/Duodenum_0_control	Duodenum	0	Bl-04	path:mmu04310	Wnt signaling pathway	74.1355	268.806	0.876002	0.921476	0.33933	0.362819	0.000774865	0.00243047	0.698051	0.858684	0.011468	0.0249991	Duodenum_0_Bl-04/Duodenum_0_control
Duodenum_0_Bl-04/Duodenum_0_control	Duodenum	0	Bl-04	path:mmu04360	Axon guidance	179.575	352.621	0.465943	0.15836	0.88056	0.649175	0.000341818	0.00274156	0.955322	0.958052	0.00758837	0.0269171	Duodenum_0_Bl-04/Duodenum_0_control
Duodenum_0_Bl-04/Duodenum_0_control	Duodenum	0	Bl-04	path:mmu04022	cGMP-PKG signaling pathway	123.97	270.561	0.912702	-0.555212	0.586707	0.351324	0.000613502	0.00321415	0.830408	0.851445	0.0102118	0.0301851	Duodenum_0_Bl-04/Duodenum_0_control
Duodenum_0_Bl-04/Duodenum_0_control	Duodenum	0	Bl-04	path:mmu04935	Growth hormone synthesis, secretion and action	174.725	267.679	0.136799	-0.221471	0.837081	0.89955	0.000478999	0.00353714	0.92415	0.998501	0.00900163	0.0318342	Duodenum_0_Bl-04/Duodenum_0_control
Duodenum_0_Bl-04/Duodenum_0_control	Duodenum	0	Bl-04	path:mmu04810	Regulation of actin cytoskeleton	95.4949	265.802	-1.78305	-2.54105	0.017991	0.063968	0.0246467	0.00386705	0.176639	0.366039	0.116416	0.0334113	Duodenum_0_Bl-04/Duodenum_0_control
Duodenum_0_Bl-04/Duodenum_0_control	Duodenum	0	Bl-04	path:mmu04080	Neuroactive ligand-receptor interaction	95.6041	434.71	2.844	5.1638	0.00049975	0.00349825	0.98265	0.00423257	0.0154209	0.0514743	0.998396	0.0343884	Duodenum_0_Bl-04/Duodenum_0_control
Duodenum_0_Bl-04/Duodenum_0_control	Duodenum	0	Bl-04	path:mmu04740	Olfactory transduction	694.602	1060.57	10.4194	11.5362	0.00049975	0.00049975	1	0.00429855	0.0154209	0.0114387	1	0.0343884	Duodenum_0_Bl-04/Duodenum_0_control
Duodenum_0_Bl-04/Duodenum_0_control	Duodenum	0	Bl-04	path:mmu04927	Cortisol synthesis and secretion	27.0451	102.725	-0.195686	-1.14183	0.246377	0.858071	0.00236626	0.00492473	0.57223	0.998501	0.0238777	0.0379908	Duodenum_0_Bl-04/Duodenum_0_control
Duodenum_0_Bl-04/Duodenum_0_control	Duodenum	0	Bl-04	path:mmu05202	Transcriptional misregulation in cancer	0	198.489	-1.03774	-1.94616	0.047976	0.163418	0.0143884	0.00571457	0.311844	0.580417	0.0819035	0.0425366	Duodenum_0_Bl-04/Duodenum_0_control
Duodenum_0_Bl-04/Duodenum_0_control	Duodenum	0	Bl-04	path:mmu04068	FoxO signaling pathway	127.918	240.313	1.82183	0.582584	0.53923	0.0624688	0.00132954	0.00590787	0.800416	0.366039	0.0163976	0.0425366	Duodenum_0_Bl-04/Duodenum_0_control
Duodenum_0_Bl-04/Duodenum_0_control	Duodenum	0	Bl-04	path:mmu04122	Sulfur relay system	10.9428	28.9762	0.793194	1.37122	0.163418	0.446277	0.00711631	0.00902067	0.49716	0.884377	0.0475791	0.0611935	Duodenum_0_Bl-04/Duodenum_0_control
Duodenum_0_Bl-04/Duodenum_0_control	Duodenum	0	Bl-04	path:mmu04130	SNARE interactions in vesicular transport	16.9958	62.3137	1.57625	0.130293	0.894053	0.115942	0.0013082	0.0090657	0.960668	0.491632	0.0163976	0.0611935	Duodenum_0_Bl-04/Duodenum_0_control
Duodenum_0_Bl-04/Duodenum_0_control	Duodenum	0	Bl-04	path:mmu04714	Thermogenesis	131.859	358.648	0.785786	0.537422	0.604198	0.446777	0.00227319	0.0104251	0.833152	0.884377	0.0238777	0.0614015	Duodenum_0_Bl-04/Duodenum_0_control
Duodenum_0_Bl-04/Duodenum_0_control	Duodenum	0	Bl-04	path:mmu04910	Insulin signaling pathway	151.93	276.091	0.906608	0.41908	0.676162	0.343328	0.00205208	0.0105178	0.833152	0.851445	0.0227781	0.0614015	Duodenum_0_Bl-04/Duodenum_0_control
Duodenum_0_Bl-04/Duodenum_0_control	Duodenum	0	Bl-04	path:mmu04014	Ras signaling pathway	189.991	395.619	0.78001	0.124341	0.910545	0.446777	0.00162474	0.0111193	0.960668	0.884377	0.0189837	0.0632045	Duodenum_0_Bl-04/Duodenum_0_control
Duodenum_0_Bl-04/Duodenum_0_control	Duodenum	0	Bl-04	path:mmu04020	Calcium signaling pathway	171.476	365.999	4.34129	3.46262	0.0029985	0.00049975	0.693399	0.0149196	0.0629685	0.0114387	0.850467	0.0805658	Duodenum_0_Bl-04/Duodenum_0_control
Duodenum_0_Bl-04/Duodenum_0_control	Duodenum	0	Bl-04	path:mmu04611	Platelet activation	120.82	225.634	-0.104389	-0.563755	0.581209	0.924038	0.00377561	0.0156283	0.830408	0.998501	0.0299352	0.0814513	Duodenum_0_Bl-04/Duodenum_0_control
Duodenum_0_Bl-04/Duodenum_0_control	Duodenum	0	Bl-04	path:mmu04140	Autophagy - animal	134.948	269.623	0.0107026	-0.042418	0.958521	0.995502	0.00350653	0.0225041	0.974048	0.998501	0.0296104	0.104828	Duodenum_0_Bl-04/Duodenum_0_control
Duodenum_0_Bl-04/Duodenum_0_control	Duodenum	0	Bl-04	path:mmu04931	Insulin resistance	70.2775	182.328	-0.801394	-0.693416	0.482259	0.423288	0.0069854	0.0225479	0.800416	0.884377	0.0475791	0.104828	Duodenum_0_Bl-04/Duodenum_0_control
Duodenum_0_Bl-04/Duodenum_0_control	Duodenum	0	Bl-04	path:mmu04915	Estrogen signaling pathway	95.2808	231.053	0.285643	-0.0366607	0.972014	0.790605	0.00360126	0.0232952	0.981098	0.998501	0.0296104	0.104828	Duodenum_0_Bl-04/Duodenum_0_control
Duodenum_0_Bl-04/Duodenum_0_control	Duodenum	0	Bl-04	path:mmu04550	Signaling pathways regulating pluripotency of stem cells							3.03899e-06				0.000295882		Duodenum_0_Bl-04/Duodenum_0_control
Duodenum_0_Bl-04/Duodenum_0_control	Duodenum	0	Bl-04	path:mmu05215	Prostate cancer							0.00728689				0.0475791		Duodenum_0_Bl-04/Duodenum_0_control
Duodenum_3_Bl-04/Duodenum_3_control	Duodenum	3	Bl-04	path:mmu05132	Salmonella infection	64.0975	101.548	1.21077	0.955395	0.323838	0.214393	3.99101e-07	5.16296e-06	0.942252	0.597945	3.02532e-05	0.000485182	Duodenum_3_Bl-04/Duodenum_3_control
Duodenum_3_Bl-04/Duodenum_3_control	Duodenum	3	Bl-04	path:mmu05165	Human papillomavirus infection	66.7701	114.96	1.21596	0.896364	0.368316	0.212394	4.22138e-07	5.82467e-06	0.942252	0.597945	3.02532e-05	0.000485182	Duodenum_3_Bl-04/Duodenum_3_control
Duodenum_3_Bl-04/Duodenum_3_control	Duodenum	3	Bl-04	path:mmu05211	Renal cell carcinoma	20.4094	37.6977	2.21702	1.69499	0.0749625	0.027986	5.94644e-06	6.96433e-06	0.602583	0.376864	0.000213081	0.000485182	Duodenum_3_Bl-04/Duodenum_3_control
Duodenum_3_Bl-04/Duodenum_3_control	Duodenum	3	Bl-04	path:mmu05014	Amyotrophic lateral sclerosis	15.6694	67.1335	0.743959	-0.0442765	0.965517	0.465267	6.98703e-08	1.43385e-05	0.997275	0.784646	1.50221e-05	0.000749187	Duodenum_3_Bl-04/Duodenum_3_control
Duodenum_3_Bl-04/Duodenum_3_control	Duodenum	3	Bl-04	path:mmu05135	Yersinia infection	59.2772	81.5736	2.57435	2.42251	0.021989	0.0144928	0.000142793	4.29263e-05	0.45957	0.318241	0.00236158	0.00158493	Duodenum_3_Bl-04/Duodenum_3_control
Duodenum_3_Bl-04/Duodenum_3_control	Duodenum	3	Bl-04	path:mmu04714	Thermogenesis	20.4549	54.9733	-0.163207	-0.258182	0.789605	0.871064	4.23443e-06	4.55003e-05	0.997275	0.96301	0.000213081	0.00158493	Duodenum_3_Bl-04/Duodenum_3_control
Duodenum_3_Bl-04/Duodenum_3_control	Duodenum	3	Bl-04	path:mmu05022	Pathways of neurodegeneration - multiple diseases	39.9116	93.9959	0.731467	0.43944	0.642679	0.446777	1.19312e-05	9.7984e-05	0.997275	0.777752	0.000366457	0.00292552	Duodenum_3_Bl-04/Duodenum_3_control
Duodenum_3_Bl-04/Duodenum_3_control	Duodenum	3	Bl-04	path:mmu04218	Cellular senescence	84.2894	109.728	4.0865	4.17244	0.00149925	0.001999	0.00656751	0.000123359	0.156672	0.198901	0.0362055	0.00322275	Duodenum_3_Bl-04/Duodenum_3_control
Duodenum_3_Bl-04/Duodenum_3_control	Duodenum	3	Bl-04	path:mmu05163	Human cytomegalovirus infection	46.1419	76.3833	0.215434	-0.214075	0.836082	0.824588	1.75754e-05	0.000178216	0.997275	0.949664	0.00047234	0.00382479	Duodenum_3_Bl-04/Duodenum_3_control
Duodenum_3_Bl-04/Duodenum_3_control	Duodenum	3	Bl-04	path:mmu04144	Endocytosis	0	29.5006		-2.06125	0.0409795		0.000382115	0.000188916	0.478261		0.00456415	0.00382479	Duodenum_3_Bl-04/Duodenum_3_control
Duodenum_3_Bl-04/Duodenum_3_control	Duodenum	3	Bl-04	path:mmu05010	Alzheimer disease	40.8945	86.9664	0.958125	0.808948	0.397301	0.308846	4.22403e-05	0.000201305	0.942252	0.660863	0.00100907	0.00382479	Duodenum_3_Bl-04/Duodenum_3_control
Duodenum_3_Bl-04/Duodenum_3_control	Duodenum	3	Bl-04	path:mmu04510	Focal adhesion	41.059	66.6294	1.15136	0.634156	0.517741	0.24038	5.29274e-05	0.000315265	0.961103	0.597945	0.00113794	0.00549086	Duodenum_3_Bl-04/Duodenum_3_control
Duodenum_3_Bl-04/Duodenum_3_control	Duodenum	3	Bl-04	path:mmu04145	Phagosome	0	23.938		-1.37095	0.166917		0.000197903	0.000373871	0.898737		0.00283661	0.00601069	Duodenum_3_Bl-04/Duodenum_3_control
Duodenum_3_Bl-04/Duodenum_3_control	Duodenum	3	Bl-04	path:mmu05012	Parkinson disease	15.5653	52.62	0.904565	1.01768	0.295352	0.358821	0.000125533	0.000415352	0.942252	0.714053	0.00224914	0.00620061	Duodenum_3_Bl-04/Duodenum_3_control
Duodenum_3_Bl-04/Duodenum_3_control	Duodenum	3	Bl-04	path:mmu05169	Epstein-Barr virus infection	41.8965	72.8956	0.864853	0.71596	0.464268	0.377811	9.62354e-05	0.000492184	0.954366	0.727708	0.00188096	0.00685777	Duodenum_3_Bl-04/Duodenum_3_control
Duodenum_3_Bl-04/Duodenum_3_control	Duodenum	3	Bl-04	path:mmu05167	Kaposi sarcoma-associated herpesvirus infection	43.5575	70.2487	0.609153	0.319648	0.751624	0.535232	0.000165129	0.00124044	0.997275	0.829999	0.00253591	0.0162033	Duodenum_3_Bl-04/Duodenum_3_control
Duodenum_3_Bl-04/Duodenum_3_control	Duodenum	3	Bl-04	path:mmu05418	Fluid shear stress and atherosclerosis	14.2101	36.3981	-0.46494	-0.512181	0.606697	0.638181	0.000251428	0.00149308	0.997275	0.888098	0.00337856	0.0178673	Duodenum_3_Bl-04/Duodenum_3_control
Duodenum_3_Bl-04/Duodenum_3_control	Duodenum	3	Bl-04	path:mmu05100	Bacterial invasion of epithelial cells	25.5394	38.5685	1.35407	1.2122	0.174413	0.138931	0.00090449	0.00153881	0.898737	0.580916	0.00845501	0.0178673	Duodenum_3_Bl-04/Duodenum_3_control
Duodenum_3_Bl-04/Duodenum_3_control	Duodenum	3	Bl-04	path:mmu05016	Huntington disease	5.01128	39.6586	-0.0703066	-0.558302	0.563718	0.946027	0.0003319	0.00179313	0.982836	0.986172	0.00419756	0.0195024	Duodenum_3_Bl-04/Duodenum_3_control
Duodenum_3_Bl-04/Duodenum_3_control	Duodenum	3	Bl-04	path:mmu05203	Viral carcinogenesis	1.34119	25.0345	0.719121	-1.08892	0.268366	0.231884	0.000729004	0.00186625	0.904653	0.597945	0.0078368	0.0195024	Duodenum_3_Bl-04/Duodenum_3_control
Duodenum_3_Bl-04/Duodenum_3_control	Duodenum	3	Bl-04	path:mmu05205	Proteoglycans in cancer	41.5075	70.5041	0.360468	0.501724	0.612694	0.722139	0.000543356	0.00299874	0.997275	0.920697	0.0061485	0.0298446	Duodenum_3_Bl-04/Duodenum_3_control
Duodenum_3_Bl-04/Duodenum_3_control	Duodenum	3	Bl-04	path:mmu04932	Non-alcoholic fatty liver disease	11.12	33.3231	-0.833485	-0.684759	0.482759	0.403298	0.00128557	0.00520378	0.961103	0.75006	0.0104641	0.0488456	Duodenum_3_Bl-04/Duodenum_3_control
Duodenum_3_Bl-04/Duodenum_3_control	Duodenum	3	Bl-04	path:mmu05225	Hepatocellular carcinoma	33.151	54.9525	1.10182	0.916093	0.347826	0.24038	0.00187396	0.00543334	0.942252	0.597945	0.0129968	0.0488456	Duodenum_3_Bl-04/Duodenum_3_control
Duodenum_3_Bl-04/Duodenum_3_control	Duodenum	3	Bl-04	path:mmu04010	MAPK signaling pathway	17.5864	46.9332	0.0546138	-0.700324	0.465767	0.962019	0.00145099	0.00560907	0.954366	0.991926	0.0111416	0.0488456	Duodenum_3_Bl-04/Duodenum_3_control
Duodenum_3_Bl-04/Duodenum_3_control	Duodenum	3	Bl-04	path:mmu04012	ErbB signaling pathway	18.3497	30.3242	0.172238	-0.162857	0.868566	0.851574	0.000832569	0.00595283	0.997275	0.954834	0.00817851	0.0497657	Duodenum_3_Bl-04/Duodenum_3_control
Duodenum_3_Bl-04/Duodenum_3_control	Duodenum	3	Bl-04	path:mmu05170	Human immunodeficiency virus 1 infection	40.4255	68.8268	0.0940768	0.0730201	0.941029	0.918541	0.000836871	0.00641563	0.997275	0.98274	0.00817851	0.0503559	Duodenum_3_Bl-04/Duodenum_3_control
Duodenum_3_Bl-04/Duodenum_3_control	Duodenum	3	Bl-04	path:mmu04612	Antigen processing and presentation	6.85952	21.3461	0.675395	0.0997012	0.92004	0.505747	0.00100873	0.00740827	0.997275	0.809127	0.00898301	0.0552975	Duodenum_3_Bl-04/Duodenum_3_control
Duodenum_3_Bl-04/Duodenum_3_control	Duodenum	3	Bl-04	path:mmu04210	Apoptosis	22.6177	39.2735	-0.192989	-0.465031	0.631184	0.83908	0.00160763	0.00800925	0.997275	0.954834	0.0119186	0.0577218	Duodenum_3_Bl-04/Duodenum_3_control
Duodenum_3_Bl-04/Duodenum_3_control	Duodenum	3	Bl-04	path:mmu05416	Viral myocarditis	0	14.7771	-1.17335	-0.871285	0.34033	0.12094	0.00312319	0.00834042	0.942252	0.546977	0.0197496	0.0581049	Duodenum_3_Bl-04/Duodenum_3_control
Duodenum_3_Bl-04/Duodenum_3_control	Duodenum	3	Bl-04	path:mmu05213	Endometrial cancer	14.1658	23.5948	0.596913	0.154315	0.87956	0.526237	0.0013141	0.00897262	0.997275	0.824576	0.0104641	0.0604929	Duodenum_3_Bl-04/Duodenum_3_control
Duodenum_3_Bl-04/Duodenum_3_control	Duodenum	3	Bl-04	path:mmu04722	Neurotrophin signaling pathway	29.8423	44.1094	0.741017	0.285442	0.769115	0.452274	0.00173866	0.0101859	0.997275	0.777752	0.0124604	0.0665267	Duodenum_3_Bl-04/Duodenum_3_control
Duodenum_3_Bl-04/Duodenum_3_control	Duodenum	3	Bl-04	path:mmu04936	Alcoholic liver disease	28.5242	45.6228	1.35643	1.06732	0.265367	0.155422	0.00549416	0.0109796	0.904653	0.580916	0.0319255	0.067492	Duodenum_3_Bl-04/Duodenum_3_control
Duodenum_3_Bl-04/Duodenum_3_control	Duodenum	3	Bl-04	path:mmu04810	Regulation of actin cytoskeleton	35.1872	62.328	-0.193504	-0.166585	0.878061	0.854073	0.00197495	0.0127584	0.997275	0.954834	0.0132692	0.0740698	Duodenum_3_Bl-04/Duodenum_3_control
Duodenum_3_Bl-04/Duodenum_3_control	Duodenum	3	Bl-04	path:mmu04071	Sphingolipid signaling pathway	9.63145	27.4642	-1.18392	-0.886263	0.368816	0.216392	0.00587963	0.0154695	0.942252	0.597945	0.0332663	0.0862132	Duodenum_3_Bl-04/Duodenum_3_control
Duodenum_3_Bl-04/Duodenum_3_control	Duodenum	3	Bl-04	path:mmu05161	Hepatitis B	68.133	86.389	-0.311461	-0.350051	0.756622	0.789105	0.00299973	0.0160876	0.997275	0.945976	0.0195437	0.0862132	Duodenum_3_Bl-04/Duodenum_3_control
Duodenum_3_Bl-04/Duodenum_3_control	Duodenum	3	Bl-04	path:mmu05164	Influenza A	20.8219	41.7545	0.796461	0.580456	0.573713	0.428786	0.00486768	0.0192156	0.982836	0.770516	0.0299014	0.0933966	Duodenum_3_Bl-04/Duodenum_3_control
Duodenum_3_Bl-04/Duodenum_3_control	Duodenum	3	Bl-04	path:mmu05220	Chronic myeloid leukemia	17.9774	26.9867	1.485	0.720845	0.447276	0.113943	0.00721377	0.0217351	0.953885	0.539873	0.038774	0.100811	Duodenum_3_Bl-04/Duodenum_3_control
Duodenum_3_Bl-04/Duodenum_3_control	Duodenum	3	Bl-04	path:mmu05222	Small cell lung cancer	17.7094	31.5379	0.884556	0.780626	0.435782	0.370315	0.00777978	0.0226703	0.953885	0.725402	0.039825	0.100811	Duodenum_3_Bl-04/Duodenum_3_control
Duodenum_3_Bl-04/Duodenum_3_control	Duodenum	3	Bl-04	path:mmu05168	Herpes simplex virus 1 infection	25.894	65.5912	0.831261	0.883028	0.36032	0.395302	0.0108919	0.0256686	0.942252	0.749192	0.0498247	0.107939	Duodenum_3_Bl-04/Duodenum_3_control
Duodenum_3_Bl-04/Duodenum_3_control	Duodenum	3	Bl-04	path:mmu05145	Toxoplasmosis	8.44175	23.7311	-0.543224	-0.50732	0.608696	0.581709	0.00748532	0.0291203	0.997275	0.844607	0.0392523	0.114634	Duodenum_3_Bl-04/Duodenum_3_control
Duodenum_3_Bl-04/Duodenum_3_control	Duodenum	3	Bl-04	path:mmu05210	Colorectal cancer	12.114	25.3257	0.0350904	-0.0578028	0.956022	0.978011	0.00543992	0.0325509	0.997275	0.992494	0.0319255	0.123693	Duodenum_3_Bl-04/Duodenum_3_control
Duodenum_3_Bl-04/Duodenum_3_control	Duodenum	3	Bl-04	path:mmu04940	Type I diabetes mellitus	0	12.6154	-0.586992	0.287487	0.78061	0.261369	0.00874144	0.0408557	0.997275	0.607109	0.0427138	0.144726	Duodenum_3_Bl-04/Duodenum_3_control
Duodenum_3_Bl-04/Duodenum_3_control	Duodenum	3	Bl-04	path:mmu05160	Hepatitis C	22.5059	39.6176	0.573592	0.132073	0.884058	0.553723	0.00807155	0.042405	0.997275	0.829999	0.0403577	0.147711	Duodenum_3_Bl-04/Duodenum_3_control
Duodenum_3_Bl-04/Duodenum_3_control	Duodenum	3	Bl-04	path:mmu05226	Gastric cancer	29.7463	45.8059	0.406212	0.204477	0.83908	0.703148	0.00992154	0.0481891	0.997275	0.907885	0.0474029	0.16054	Duodenum_3_Bl-04/Duodenum_3_control
Duodenum_3_Bl-04/Duodenum_3_control	Duodenum	3	Bl-04	path:mmu03460	Fanconi anemia pathway	1.00626	11.2502	-0.406404	-0.0261073	0.970515	0.658671	0.0102958	0.0560157	0.997275	0.903969	0.0481215	0.175584	Duodenum_3_Bl-04/Duodenum_3_control
Duodenum_3_Bl-04/Duodenum_3_control	Duodenum	3	Bl-04	path:mmu05200	Pathways in cancer							5.05547e-06				0.000213081		Duodenum_3_Bl-04/Duodenum_3_control
Duodenum_3_Bl-04/Duodenum_3_control	Duodenum	3	Bl-04	path:mmu05215	Prostate cancer							0.00104454				0.00898301		Duodenum_3_Bl-04/Duodenum_3_control
Duodenum_7_Bl-04/Duodenum_7_control	Duodenum	7	Bl-04	path:mmu05144	Malaria	0	2.9342	-0.262529	1.89242	0.0404798	0.0714643	0.00246282	0.00101822	0.0809595	0.142929	0.00246282	0.00203644	Duodenum_7_Bl-04/Duodenum_7_control
Duodenum_7_Bl-04/Duodenum_7_control	Duodenum	7	Bl-04	path:mmu05143	African trypanosomiasis	0	2.9342	-0.552404	0.64205	0.557721	0.190405	0.00170503	0.00756758	0.557721	0.190405	0.00246282	0.00756758	Duodenum_7_Bl-04/Duodenum_7_control
Ileum_-18_Bl-04/Ileum_-18_control	Ileum	-18	Bl-04	path:mmu04710	Circadian rhythm	0	1.73406		-1.03953	0.00049975		0.00312367	2.24326e-05	0.00849575		0.0161406	0.000381354	Ileum_-18_Bl-04/Ileum_-18_control
Ileum_-18_Bl-04/Ileum_-18_control	Ileum	-18	Bl-04	path:mmu04730	Long-term depression	0	4.66042	-0.812592	-0.457477	0.511744	0.198401	0.00567576	0.0198713	0.704148	0.251874	0.0161406	0.0547235	Ileum_-18_Bl-04/Ileum_-18_control
Ileum_-18_Bl-04/Ileum_-18_control	Ileum	-18	Bl-04	path:mmu04913	Ovarian steroidogenesis	0	4.66042	-0.357832	0.198795	0.536732	0.11994	0.0055813	0.0204022	0.704148	0.251874	0.0161406	0.0547235	Ileum_-18_Bl-04/Ileum_-18_control
Ileum_-18_Bl-04/Ileum_-18_control	Ileum	-18	Bl-04	path:mmu04664	Fc epsilon RI signaling pathway	0	4.66042	-0.731537	-0.462343	0.501749	0.172414	0.00605357	0.0206443	0.704148	0.251874	0.0161406	0.0547235	Ileum_-18_Bl-04/Ileum_-18_control
Ileum_-18_Bl-04/Ileum_-18_control	Ileum	-18	Bl-04	path:mmu04370	VEGF signaling pathway	0	4.66042	-0.933169	-0.521666	0.55922	0.22089	0.00548683	0.0208237	0.704148	0.251874	0.0161406	0.0547235	Ileum_-18_Bl-04/Ileum_-18_control
Ileum_-18_Bl-04/Ileum_-18_control	Ileum	-18	Bl-04	path:mmu04912	GnRH signaling pathway	0	4.66042	-0.58611	-0.343595	0.545727	0.171914	0.00831892	0.0290318	0.704148	0.251874	0.0161406	0.0547235	Ileum_-18_Bl-04/Ileum_-18_control
Ileum_-18_Bl-04/Ileum_-18_control	Ileum	-18	Bl-04	path:mmu04611	Platelet activation	0	4.66042	-0.733055	-0.519972	0.484758	0.173913	0.0116179	0.0348011	0.704148	0.251874	0.0161406	0.0547235	Ileum_-18_Bl-04/Ileum_-18_control
Ileum_-18_Bl-04/Ileum_-18_control	Ileum	-18	Bl-04	path:mmu04666	Fc gamma R-mediated phagocytosis	0	4.66042	-0.667943	-0.207601	0.662169	0.123438	0.00879054	0.0357766	0.704148	0.251874	0.0161406	0.0547235	Ileum_-18_Bl-04/Ileum_-18_control
Ileum_-18_Bl-04/Ileum_-18_control	Ileum	-18	Bl-04	path:mmu05231	Choline metabolism in cancer	0	4.66042	-0.640744	-0.206563	0.688156	0.129935	0.00916776	0.0382682	0.704148	0.251874	0.0161406	0.0547235	Ileum_-18_Bl-04/Ileum_-18_control
Ileum_-18_Bl-04/Ileum_-18_control	Ileum	-18	Bl-04	path:mmu04217	Necroptosis	0	4.66042	-0.805511	-0.569658	0.497251	0.178411	0.012936	0.0388931	0.704148	0.251874	0.0161406	0.0547235	Ileum_-18_Bl-04/Ileum_-18_control
Ileum_-18_Bl-04/Ileum_-18_control	Ileum	-18	Bl-04	path:mmu04270	Vascular smooth muscle contraction	0	4.66042	-0.735433	-0.419974	0.503248	0.182409	0.0134065	0.040472	0.704148	0.251874	0.0161406	0.0547235	Ileum_-18_Bl-04/Ileum_-18_control
Ileum_-18_Bl-04/Ileum_-18_control	Ileum	-18	Bl-04	path:mmu04072	Phospholipase D signaling pathway	0	4.66042	-0.823701	-0.51559	0.497251	0.142429	0.0140651	0.0417025	0.704148	0.251874	0.0161406	0.0547235	Ileum_-18_Bl-04/Ileum_-18_control
Ileum_-18_Bl-04/Ileum_-18_control	Ileum	-18	Bl-04	path:mmu04724	Glutamatergic synapse	0	4.66042	-0.571493	0.0225045	0.669665	0.207896	0.0104875	0.0418474	0.704148	0.251874	0.0161406	0.0547235	Ileum_-18_Bl-04/Ileum_-18_control
Ileum_-18_Bl-04/Ileum_-18_control	Ileum	-18	Bl-04	path:mmu04726	Serotonergic synapse	0	4.66042	-0.531606	-0.175364	0.661169	0.23938	0.0121829	0.0468917	0.704148	0.251874	0.0161406	0.0560462	Ileum_-18_Bl-04/Ileum_-18_control
Ileum_-18_Bl-04/Ileum_-18_control	Ileum	-18	Bl-04	path:mmu04921	Oxytocin signaling pathway	0	4.66042	-0.680438	-0.271471	0.598701	0.138431	0.0143472	0.0494525	0.704148	0.251874	0.0161406	0.0560462	Ileum_-18_Bl-04/Ileum_-18_control
Ileum_-18_Bl-04/Ileum_-18_control	Ileum	-18	Bl-04	path:mmu04014	Ras signaling pathway	0	4.66042	-0.934318	-0.604505	0.503248	0.118441	0.0217631	0.0603929	0.704148	0.251874	0.0230432	0.0641674	Ileum_-18_Bl-04/Ileum_-18_control
Ileum_-18_Bl-04/Ileum_-18_control	Ileum	-18	Bl-04	path:mmu04010	MAPK signaling pathway	0	4.66042	-0.662633	-0.17302	0.704148	0.251874	0.0274701	0.0956593	0.704148	0.251874	0.0274701	0.0956593	Ileum_-18_Bl-04/Ileum_-18_control
Ileum_-18_Bl-04/Ileum_-18_control	Ileum	-18	Bl-04	path:mmu04750	Inflammatory mediator regulation of TRP channels							0.0119004				0.0161406		Ileum_-18_Bl-04/Ileum_-18_control
Ileum_-20_Bl-04/Ileum_-20_control	Ileum	-20	Bl-04	path:mmu04621	NOD-like receptor signaling pathway	4.14419	13.4999	-0.70754	-0.482316	0.637681	0.494753	0.000444501	0.0025988	0.8259	0.556597	0.00400051	0.0233892	Ileum_-20_Bl-04/Ileum_-20_control
Ileum_-21_Bl-04/Ileum_-21_control	Ileum	-21	Bl-04	path:mmu04740	Olfactory transduction	4225.95	6371.77	19.5224	21.0451	0.00049975	0.00049975	2.33255e-76	1.12029e-08	0.0215892	0.0257371	5.17827e-74	2.41982e-06	Ileum_-21_Bl-04/Ileum_-21_control
Ileum_-21_Bl-04/Ileum_-21_control	Ileum	-21	Bl-04	path:mmu04080	Neuroactive ligand-receptor interaction	138.063	698.826	0.0742053	1.92432	0.0484758	0.94053	1.57543e-18	8.64914e-07	0.227625	0.983498	1.74873e-16	9.34107e-05	Ileum_-21_Bl-04/Ileum_-21_control
Ileum_-21_Bl-04/Ileum_-21_control	Ileum	-21	Bl-04	path:mmu04742	Taste transduction	18.979	149.048	0.635118	3.70435	0.00049975	0.529735	0.0146163	9.3695e-05	0.0215892	0.789519	0.614739	0.00674604	Ileum_-21_Bl-04/Ileum_-21_control
Ileum_-21_Bl-04/Ileum_-21_control	Ileum	-21	Bl-04	path:mmu05202	Transcriptional misregulation in cancer	0	90.9889	-0.786621	-4.13229	0.00049975	0.224888	0.999541	0.00429681	0.0215892	0.557638	1	0.154748	Ileum_-21_Bl-04/Ileum_-21_control
Ileum_-21_Bl-04/Ileum_-21_control	Ileum	-21	Bl-04	path:mmu04146	Peroxisome	0	17.1095		-3.96266	0.00049975		1	0.00429855	0.0215892		1	0.154748	Ileum_-21_Bl-04/Ileum_-21_control
Ileum_-21_Bl-04/Ileum_-21_control	Ileum	-21	Bl-04	path:mmu04144	Endocytosis	0	96.3225		-3.49545	0.00049975		1	0.00429855	0.0215892		1	0.154748	Ileum_-21_Bl-04/Ileum_-21_control
Ileum_-21_Bl-04/Ileum_-21_control	Ileum	-21	Bl-04	path:mmu05168	Herpes simplex virus 1 infection	74.8175	325.416	-2.31555	-3.08364	0.0009995	0.0184908	0.99528	0.0078717	0.023988	0.244503	1	0.170718	Ileum_-21_Bl-04/Ileum_-21_control
Ileum_-21_Bl-04/Ileum_-21_control	Ileum	-21	Bl-04	path:mmu05226	Gastric cancer	313.978	397.254	3.84611	3.46728	0.0009995	0.00049975	0.999099	0.00789808	0.023988	0.0257371	1	0.170718	Ileum_-21_Bl-04/Ileum_-21_control
Ileum_-21_Bl-04/Ileum_-21_control	Ileum	-21	Bl-04	path:mmu05224	Breast cancer	367.757	449.771	3.8269	3.45993	0.0009995	0.00049975	0.999306	0.00789951	0.023988	0.0257371	1	0.170718	Ileum_-21_Bl-04/Ileum_-21_control
Ileum_-21_Bl-04/Ileum_-21_control	Ileum	-21	Bl-04	path:mmu05218	Melanoma	168.429	200.751	3.37038	3.26043	0.0009995	0.00049975	0.999897	0.00790359	0.023988	0.0257371	1	0.170718	Ileum_-21_Bl-04/Ileum_-21_control
Ileum_-21_Bl-04/Ileum_-21_control	Ileum	-21	Bl-04	path:mmu04933	AGE-RAGE signaling pathway in diabetic complications	16.1869	51.5357	-2.45304	-3.23268	0.00149925	0.013993	0.999843	0.011247	0.0294398	0.240213	1	0.202474	Ileum_-21_Bl-04/Ileum_-21_control
Ileum_-21_Bl-04/Ileum_-21_control	Ileum	-21	Bl-04	path:mmu05166	Human T-cell leukemia virus 1 infection	37.2912	136.67	-3.08204	-3.56234	0.00149925	0.0029985	1	0.0112486	0.0294398	0.102949	1	0.202474	Ileum_-21_Bl-04/Ileum_-21_control
Ileum_-21_Bl-04/Ileum_-21_control	Ileum	-21	Bl-04	path:mmu04623	Cytosolic DNA-sensing pathway	1.65275	37.784	-1.84708	-2.99139	0.00249875	0.055972	0.782545	0.0141515	0.0449775	0.335318	1	0.232215	Ileum_-21_Bl-04/Ileum_-21_control
Ileum_-21_Bl-04/Ileum_-21_control	Ileum	-21	Bl-04	path:mmu04622	RIG-I-like receptor signaling pathway	4.23012	53.1169	-2.83872	-2.85785	0.0029985	0.00349825	0.700499	0.015051	0.0498212	0.102949	1	0.232215	Ileum_-21_Bl-04/Ileum_-21_control
Ileum_5_Bl-04/Ileum_5_control	Ileum	5	Bl-04	path:mmu04510	Focal adhesion	99.1088	185.468	2.91201	2.92643	0.005997	0.00649675	6.15174e-06	6.68309e-07	0.0588797	0.0600533	0.000424513	0.000144355	Ileum_5_Bl-04/Ileum_5_control
Ileum_5_Bl-04/Ileum_5_control	Ileum	5	Bl-04	path:mmu04810	Regulation of actin cytoskeleton	124.673	224.26	2.41843	3.01123	0.007996	0.015992	1.30653e-05	1.78377e-06	0.071964	0.0849325	0.000424513	0.000192647	Ileum_5_Bl-04/Ileum_5_control
Ileum_5_Bl-04/Ileum_5_control	Ileum	5	Bl-04	path:mmu04144	Endocytosis	0	106.333		-3.11118	0.00349825		5.08739e-05	2.94391e-06	0.0503748		0.00102673	0.000211962	Ileum_5_Bl-04/Ileum_5_control
Ileum_5_Bl-04/Ileum_5_control	Ileum	5	Bl-04	path:mmu04141	Protein processing in endoplasmic reticulum	30.0825	119.484	0.999357	1.02409	0.288856	0.292854	5.84376e-08	4.63825e-06	0.594217	0.578023	1.29731e-05	0.000250466	Ileum_5_Bl-04/Ileum_5_control
Ileum_5_Bl-04/Ileum_5_control	Ileum	5	Bl-04	path:mmu04151	PI3K-Akt signaling pathway	97.8718	242.486	1.2621	1.42495	0.134933	0.191404	1.21661e-05	2.35075e-05	0.35115	0.481253	0.000424513	0.00089226	Ileum_5_Bl-04/Ileum_5_control
Ileum_5_Bl-04/Ileum_5_control	Ileum	5	Bl-04	path:mmu05205	Proteoglycans in cancer	116.145	198.899	2.20612	2.32163	0.0214893	0.023988	8.08647e-05	2.4785e-05	0.107946	0.114919	0.001496	0.00089226	Ileum_5_Bl-04/Ileum_5_control
Ileum_5_Bl-04/Ileum_5_control	Ileum	5	Bl-04	path:mmu05012	Parkinson disease	27.955	141.152	0.616999	0.738695	0.46027	0.532234	1.23159e-05	7.41492e-05	0.759711	0.756139	0.000424513	0.00209475	Ileum_5_Bl-04/Ileum_5_control
Ileum_5_Bl-04/Ileum_5_control	Ileum	5	Bl-04	path:mmu05020	Prion disease	38.6978	149.541	0.629453	0.455294	0.647176	0.523738	9.19922e-06	7.75835e-05	0.88122	0.752096	0.000424513	0.00209475	Ileum_5_Bl-04/Ileum_5_control
Ileum_5_Bl-04/Ileum_5_control	Ileum	5	Bl-04	path:mmu01521	EGFR tyrosine kinase inhibitor resistance	93.9536	136.257	2.29867	2.71671	0.0169915	0.0329835	0.000569724	0.000121445	0.101949	0.135892	0.00747035	0.00272615	Ileum_5_Bl-04/Ileum_5_control
Ileum_5_Bl-04/Ileum_5_control	Ileum	5	Bl-04	path:mmu04611	Platelet activation	102.083	161.595	4.08711	4.86178	0.00149925	0.00249875	0.00673268	0.000126211	0.0449775	0.0428952	0.036455	0.00272615	Ileum_5_Bl-04/Ileum_5_control
Ileum_5_Bl-04/Ileum_5_control	Ileum	5	Bl-04	path:mmu05415	Diabetic cardiomyopathy	22.4601	111.042	0.507476	0.348551	0.717141	0.607196	1.62112e-05	0.000143721	0.911191	0.822242	0.000449861	0.00282004	Ileum_5_Bl-04/Ileum_5_control
Ileum_5_Bl-04/Ileum_5_control	Ileum	5	Bl-04	path:mmu05171	Coronavirus disease - COVID-19	147.272	248.134	0.0420364	0.0652615	0.954023	0.972014	1.33855e-05	0.000156669	0.986862	0.981544	0.000424513	0.00282004	Ileum_5_Bl-04/Ileum_5_control
Ileum_5_Bl-04/Ileum_5_control	Ileum	5	Bl-04	path:mmu04014	Ras signaling pathway	109.804	196.088	4.19046	4.67241	0.0009995	0.0029985	0.0155226	0.000187322	0.0449775	0.0441208	0.0621452	0.00311242	Ileum_5_Bl-04/Ileum_5_control
Ileum_5_Bl-04/Ileum_5_control	Ileum	5	Bl-04	path:mmu04910	Insulin signaling pathway	65.0401	117.011	0.923042	0.54658	0.571714	0.332834	4.47302e-05	0.00029598	0.863568	0.623307	0.00099301	0.00427444	Ileum_5_Bl-04/Ileum_5_control
Ileum_5_Bl-04/Ileum_5_control	Ileum	5	Bl-04	path:mmu05163	Human cytomegalovirus infection	144.708	228.862	4.77935	4.90735	0.00049975	0.00049975	0.0513334	0.000296836	0.0449775	0.0343162	0.140691	0.00427444	Ileum_5_Bl-04/Ileum_5_control
Ileum_5_Bl-04/Ileum_5_control	Ileum	5	Bl-04	path:mmu05010	Alzheimer disease	70.4845	209.395	0.585898	0.238509	0.809095	0.550725	3.41893e-05	0.000317991	0.963476	0.766549	0.000843336	0.00429288	Ileum_5_Bl-04/Ileum_5_control
Ileum_5_Bl-04/Ileum_5_control	Ileum	5	Bl-04	path:mmu05034	Alcoholism	69.0161	113.303	4.23457	4.07492	0.001999	0.00249875	0.0180726	0.000405652	0.0449775	0.0428952	0.0665423	0.00515416	Ileum_5_Bl-04/Ileum_5_control
Ileum_5_Bl-04/Ileum_5_control	Ileum	5	Bl-04	path:mmu04371	Apelin signaling pathway	69.2335	120.076	3.78753	3.60872	0.00349825	0.003998	0.0129966	0.000500054	0.0503748	0.0457549	0.0580885	0.00600065	Ileum_5_Bl-04/Ileum_5_control
Ileum_5_Bl-04/Ileum_5_control	Ileum	5	Bl-04	path:mmu04720	Long-term potentiation	62.109	88.2861	3.00633	2.84071	0.0149925	0.0104948	0.00435776	0.00069489	0.0981328	0.072064	0.0254585	0.0078998	Ileum_5_Bl-04/Ileum_5_control
Ileum_5_Bl-04/Ileum_5_control	Ileum	5	Bl-04	path:mmu04722	Neurotrophin signaling pathway	66.8346	115.31	2.20248	2.3663	0.017991	0.0269865	0.00432239	0.000813554	0.102265	0.126346	0.0254585	0.00848014	Ileum_5_Bl-04/Ileum_5_control
Ileum_5_Bl-04/Ileum_5_control	Ileum	5	Bl-04	path:mmu05132	Salmonella infection	72.5944	159.875	-0.148646	-0.430614	0.661669	0.877061	0.00011927	0.000824459	0.887705	0.962131	0.00203677	0.00848014	Ileum_5_Bl-04/Ileum_5_control
Ileum_5_Bl-04/Ileum_5_control	Ileum	5	Bl-04	path:mmu05210	Colorectal cancer	50.8492	87.329	3.97832	4.02772	0.001999	0.001999	0.0444791	0.000918286	0.0449775	0.0428952	0.131658	0.00872022	Ileum_5_Bl-04/Ileum_5_control
Ileum_5_Bl-04/Ileum_5_control	Ileum	5	Bl-04	path:mmu05213	Endometrial cancer	41.042	70.4592	3.3077	3.63563	0.0049975	0.00649675	0.0182841	0.000941211	0.0588797	0.0600533	0.0665423	0.00872022	Ileum_5_Bl-04/Ileum_5_control
Ileum_5_Bl-04/Ileum_5_control	Ileum	5	Bl-04	path:mmu05014	Amyotrophic lateral sclerosis	16.0233	153.932	-1.00998	-0.960666	0.325837	0.305347	0.000289588	0.000968913	0.636006	0.578023	0.00428591	0.00872022	Ileum_5_Bl-04/Ileum_5_control
Ileum_5_Bl-04/Ileum_5_control	Ileum	5	Bl-04	path:mmu04512	ECM-receptor interaction	16.2163	60.3498	1.79501	1.85743	0.05997	0.0614693	0.00183467	0.00111288	0.215892	0.222152	0.0150851	0.00961531	Ileum_5_Bl-04/Ileum_5_control
Ileum_5_Bl-04/Ileum_5_control	Ileum	5	Bl-04	path:mmu05100	Bacterial invasion of epithelial cells	39.3682	71.8234	1.43241	1.48426	0.116942	0.124938	0.00129451	0.00148289	0.326606	0.343162	0.0119742	0.0122158	Ileum_5_Bl-04/Ileum_5_control
Ileum_5_Bl-04/Ileum_5_control	Ileum	5	Bl-04	path:mmu05202	Transcriptional misregulation in cancer	0	76.7033	-0.888461	-1.49592	0.137431	0.184408	0.00116705	0.00156185	0.353395	0.480861	0.0112646	0.0122158	Ileum_5_Bl-04/Ileum_5_control
Ileum_5_Bl-04/Ileum_5_control	Ileum	5	Bl-04	path:mmu04933	AGE-RAGE signaling pathway in diabetic complications	43.933	78.9914	4.49398	4.26292	0.0009995	0.00149925	0.164702	0.00159876	0.0449775	0.0428952	0.29291	0.0122158	Ileum_5_Bl-04/Ileum_5_control
Ileum_5_Bl-04/Ileum_5_control	Ileum	5	Bl-04	path:mmu04062	Chemokine signaling pathway	84.749	148.641	2.71136	2.81259	0.0129935	0.0144928	0.013083	0.0016455	0.0981328	0.0849325	0.0580885	0.0122158	Ileum_5_Bl-04/Ileum_5_control
Ileum_5_Bl-04/Ileum_5_control	Ileum	5	Bl-04	path:mmu04714	Thermogenesis	72.717	151.325	2.13289	1.77716	0.0589705	0.0394803	0.00306311	0.00173752	0.215892	0.156329	0.0206064	0.0122158	Ileum_5_Bl-04/Ileum_5_control
Ileum_5_Bl-04/Ileum_5_control	Ileum	5	Bl-04	path:mmu05016	Huntington disease	10.9389	119.635	-0.45875	-1.26351	0.207896	0.636182	0.000877619	0.0017532	0.498951	0.841904	0.00927769	0.0122158	Ileum_5_Bl-04/Ileum_5_control
Ileum_5_Bl-04/Ileum_5_control	Ileum	5	Bl-04	path:mmu05231	Choline metabolism in cancer	37.0672	74.4803	3.65583	3.58739	0.00249875	0.0029985	0.0765377	0.00182871	0.0449775	0.0441208	0.194931	0.0123438	Ileum_5_Bl-04/Ileum_5_control
Ileum_5_Bl-04/Ileum_5_control	Ileum	5	Bl-04	path:mmu04540	Gap junction	66.9109	100.045	4.40602	4.65396	0.00149925	0.00149925	0.143027	0.00202586	0.0449775	0.0428952	0.278526	0.0132602	Ileum_5_Bl-04/Ileum_5_control
Ileum_5_Bl-04/Ileum_5_control	Ileum	5	Bl-04	path:mmu05206	MicroRNAs in cancer	0	78.3789		0.211771	0.838581		0.000287577	0.00225001	0.963476		0.00428591	0.0142942	Ileum_5_Bl-04/Ileum_5_control
Ileum_5_Bl-04/Ileum_5_control	Ileum	5	Bl-04	path:mmu04621	NOD-like receptor signaling pathway	49.5239	134.474	0.758161	1.69616	0.087956	0.429785	0.00293217	0.00238893	0.27939	0.678203	0.020342	0.0147431	Ileum_5_Bl-04/Ileum_5_control
Ileum_5_Bl-04/Ileum_5_control	Ileum	5	Bl-04	path:mmu04912	GnRH signaling pathway	63.534	97.1236	3.90523	4.02236	0.00249875	0.00249875	0.11423	0.00261499	0.0449775	0.0428952	0.246695	0.0156899	Ileum_5_Bl-04/Ileum_5_control
Ileum_5_Bl-04/Ileum_5_control	Ileum	5	Bl-04	path:mmu04919	Thyroid hormone signaling pathway	39.5185	77.6695	4.67758	3.28804	0.00449775	0.00049975	0.0792613	0.0031868	0.0571479	0.0343162	0.195976	0.017451	Ileum_5_Bl-04/Ileum_5_control
Ileum_5_Bl-04/Ileum_5_control	Ileum	5	Bl-04	path:mmu04012	ErbB signaling pathway	51.7886	84.972	2.55953	2.61419	0.0214893	0.0224888	0.0166544	0.00319785	0.107946	0.110302	0.0636725	0.017451	Ileum_5_Bl-04/Ileum_5_control
Ileum_5_Bl-04/Ileum_5_control	Ileum	5	Bl-04	path:mmu04926	Relaxin signaling pathway	106.628	153.166	3.22088	3.40737	0.0089955	0.011994	0.0400012	0.00321325	0.0777211	0.0748717	0.121648	0.017451	Ileum_5_Bl-04/Ileum_5_control
Ileum_5_Bl-04/Ileum_5_control	Ileum	5	Bl-04	path:mmu04921	Oxytocin signaling pathway	49.2674	104.663	2.81859	2.39874	0.0194903	0.00949525	0.019128	0.00331593	0.105247	0.0698579	0.0684905	0.017451	Ileum_5_Bl-04/Ileum_5_control
Ileum_5_Bl-04/Ileum_5_control	Ileum	5	Bl-04	path:mmu04915	Estrogen signaling pathway	52.1182	107.44	1.67429	1.95404	0.0504748	0.081959	0.00763379	0.00341444	0.198228	0.27141	0.039983	0.017451	Ileum_5_Bl-04/Ileum_5_control
Ileum_5_Bl-04/Ileum_5_control	Ileum	5	Bl-04	path:mmu04666	Fc gamma R-mediated phagocytosis	36.6715	71.328	2.86321	2.04799	0.0429785	0.007996	0.00901919	0.00343265	0.178526	0.0633529	0.0435274	0.017451	Ileum_5_Bl-04/Ileum_5_control
Ileum_5_Bl-04/Ileum_5_control	Ileum	5	Bl-04	path:mmu05146	Amoebiasis	7.24534	59.7779	-1.05704	-0.466555	0.648676	0.293853	0.000605704	0.00347405	0.88122	0.578023	0.00747035	0.017451	Ileum_5_Bl-04/Ileum_5_control
Ileum_5_Bl-04/Ileum_5_control	Ileum	5	Bl-04	path:mmu05412	Arrhythmogenic right ventricular cardiomyopathy	3.7853	42.9923	3.16745	1.99512	0.047976	0.00749625	0.00850237	0.00359143	0.191904	0.0617691	0.0428983	0.0175182	Ileum_5_Bl-04/Ileum_5_control
Ileum_5_Bl-04/Ileum_5_control	Ileum	5	Bl-04	path:mmu04211	Longevity regulating pathway	22.481	60.706	-0.0896634	-0.34404	0.712644	0.924038	0.000582866	0.00364963	0.911191	0.9808	0.00747035	0.0175182	Ileum_5_Bl-04/Ileum_5_control
Ileum_5_Bl-04/Ileum_5_control	Ileum	5	Bl-04	path:mmu04530	Tight junction	42.7871	107.678	0.864917	0.693795	0.48076	0.374813	0.00100615	0.00417642	0.76892	0.630869	0.010153	0.019373	Ileum_5_Bl-04/Ileum_5_control
Ileum_5_Bl-04/Ileum_5_control	Ileum	5	Bl-04	path:mmu04740	Olfactory transduction	411.906	630.371	13.9235	15.0035	0.00049975	0.00049975	1	0.00429855	0.0449775	0.0343162	1	0.019373	Ileum_5_Bl-04/Ileum_5_control
Ileum_5_Bl-04/Ileum_5_control	Ileum	5	Bl-04	path:mmu05022	Pathways of neurodegeneration - multiple diseases	61.9169	221.586	-0.188891	-0.450863	0.647676	0.855572	0.000772937	0.00430511	0.88122	0.95603	0.00903115	0.019373	Ileum_5_Bl-04/Ileum_5_control
Ileum_5_Bl-04/Ileum_5_control	Ileum	5	Bl-04	path:mmu04935	Growth hormone synthesis, secretion and action	99.2732	137.472	2.32661	2.25819	0.035982	0.029985	0.015658	0.00477853	0.152394	0.134463	0.0621452	0.0206795	Ileum_5_Bl-04/Ileum_5_control
Ileum_5_Bl-04/Ileum_5_control	Ileum	5	Bl-04	path:mmu05222	Small cell lung cancer	45.897	83.4263	2.87832	3.0653	0.0114943	0.0109945	0.0491139	0.00478693	0.0954907	0.0730602	0.137838	0.0206795	Ileum_5_Bl-04/Ileum_5_control
Ileum_5_Bl-04/Ileum_5_control	Ileum	5	Bl-04	path:mmu04728	Dopaminergic synapse	32.8868	85.4863	1.21903	0.880046	0.367316	0.211394	0.00173814	0.00533517	0.672376	0.505384	0.0148411	0.022596	Ileum_5_Bl-04/Ileum_5_control
Ileum_5_Bl-04/Ileum_5_control	Ileum	5	Bl-04	path:mmu04015	Rap1 signaling pathway	81.4321	156.24	2.09304	2.23491	0.0304848	0.0409795	0.0214326	0.00544475	0.136585	0.156329	0.0755244	0.0226167	Ileum_5_Bl-04/Ileum_5_control
Ileum_5_Bl-04/Ileum_5_control	Ileum	5	Bl-04	path:mmu05207	Chemical carcinogenesis - receptor activation	72.8735	138.79	3.75795	3.60957	0.003998	0.00249875	0.176441	0.0058244	0.053973	0.0428952	0.306016	0.0237372	Ileum_5_Bl-04/Ileum_5_control
Ileum_5_Bl-04/Ileum_5_control	Ileum	5	Bl-04	path:mmu04068	FoxO signaling pathway	51.5993	99.1459	1.81509	1.5339	0.110445	0.0594703	0.00666032	0.00604281	0.313896	0.218766	0.036455	0.0241712	Ileum_5_Bl-04/Ileum_5_control
Ileum_5_Bl-04/Ileum_5_control	Ileum	5	Bl-04	path:mmu04022	cGMP-PKG signaling pathway	35.9826	96.2973	-0.0557519	-0.65793	0.50075	0.958521	0.00156231	0.00637849	0.778143	0.9808	0.0138733	0.0246248	Ileum_5_Bl-04/Ileum_5_control
Ileum_5_Bl-04/Ileum_5_control	Ileum	5	Bl-04	path:mmu05134	Legionellosis	8.73187	36.5209	-0.717799	-0.867022	0.391304	0.464768	0.00200132	0.00638421	0.704348	0.701853	0.0158676	0.0246248	Ileum_5_Bl-04/Ileum_5_control
Ileum_5_Bl-04/Ileum_5_control	Ileum	5	Bl-04	path:mmu05235	PD-L1 expression and PD-1 checkpoint pathway in cancer	67.1014	97.1255	3.90064	3.95463	0.00249875	0.00349825	0.330132	0.00668202	0.0449775	0.04504	0.491874	0.0250138	Ileum_5_Bl-04/Ileum_5_control
Ileum_5_Bl-04/Ileum_5_control	Ileum	5	Bl-04	path:mmu04662	B cell receptor signaling pathway	41.6501	62.4462	4.86109	4.48913	0.00149925	0.00149925	0.554489	0.00672744	0.0449775	0.0428952	0.669003	0.0250138	Ileum_5_Bl-04/Ileum_5_control
Ileum_5_Bl-04/Ileum_5_control	Ileum	5	Bl-04	path:mmu04932	Non-alcoholic fatty liver disease	25.3976	84.0669	-1.09747	-0.920984	0.349825	0.251374	0.00241876	0.00683246	0.672376	0.543398	0.018516	0.0250138	Ileum_5_Bl-04/Ileum_5_control
Ileum_5_Bl-04/Ileum_5_control	Ileum	5	Bl-04	path:mmu04726	Serotonergic synapse	39.062	81.5181	3.85638	3.91797	0.0029985	0.00349825	0.38637	0.0089909	0.0498212	0.04504	0.529637	0.0323672	Ileum_5_Bl-04/Ileum_5_control
Ileum_5_Bl-04/Ileum_5_control	Ileum	5	Bl-04	path:mmu05220	Chronic myeloid leukemia	36.9148	63.2276	2.90391	2.42592	0.017991	0.0089955	0.0794499	0.0107926	0.102265	0.0686324	0.195976	0.0382163	Ileum_5_Bl-04/Ileum_5_control
Ileum_5_Bl-04/Ileum_5_control	Ileum	5	Bl-04	path:mmu05221	Acute myeloid leukemia	23.1463	49.1343	3.07157	2.64543	0.0154923	0.0069965	0.094534	0.0110225	0.0984214	0.0600533	0.211985	0.0384009	Ileum_5_Bl-04/Ileum_5_control
Ileum_5_Bl-04/Ileum_5_control	Ileum	5	Bl-04	path:mmu05165	Human papillomavirus infection	104.773	217.352	1.28198	0.699651	0.491254	0.193403	0.00343797	0.0124704	0.76892	0.481253	0.0218065	0.0416484	Ileum_5_Bl-04/Ileum_5_control
Ileum_5_Bl-04/Ileum_5_control	Ileum	5	Bl-04	path:mmu04660	T cell receptor signaling pathway	59.096	87.5549	3.48599	3.16896	0.00549725	0.00249875	0.309818	0.0125612	0.0588797	0.0428952	0.477637	0.0416484	Ileum_5_Bl-04/Ileum_5_control
Ileum_5_Bl-04/Ileum_5_control	Ileum	5	Bl-04	path:mmu05017	Spinocerebellar ataxia	10.643	70.0316	-0.28554	-0.485442	0.611694	0.77911	0.00279751	0.0126126	0.873511	0.933121	0.020342	0.0416484	Ileum_5_Bl-04/Ileum_5_control
Ileum_5_Bl-04/Ileum_5_control	Ileum	5	Bl-04	path:mmu05223	Non-small cell lung cancer	45.5148	68.3472	3.69424	3.4232	0.005997	0.005997	0.288313	0.0127259	0.0588797	0.0600533	0.447591	0.0416484	Ileum_5_Bl-04/Ileum_5_control
Ileum_5_Bl-04/Ileum_5_control	Ileum	5	Bl-04	path:mmu04071	Sphingolipid signaling pathway	51.742	93.1071	2.49094	2.53563	0.013993	0.0174913	0.147379	0.0148153	0.0981328	0.0878829	0.284505	0.0477626	Ileum_5_Bl-04/Ileum_5_control
Ileum_5_Bl-04/Ileum_5_control	Ileum	5	Bl-04	path:mmu05417	Lipid and atherosclerosis	84.4599	150.067	2.5784	2.46834	0.0134933	0.0104948	0.156402	0.0151122	0.0981328	0.072064	0.291695	0.0480034	Ileum_5_Bl-04/Ileum_5_control
Ileum_5_Bl-04/Ileum_5_control	Ileum	5	Bl-04	path:mmu04664	Fc epsilon RI signaling pathway	44.3372	63.4274	3.29234	3.36082	0.00549725	0.00449775	0.430715	0.0166827	0.0588797	0.0487651	0.576016	0.0514781	Ileum_5_Bl-04/Ileum_5_control
Ileum_5_Bl-04/Ileum_5_control	Ileum	5	Bl-04	path:mmu04010	MAPK signaling pathway	39.661	142.686	0.336373	-0.323672	0.743628	0.734633	0.0034373	0.017814	0.928461	0.9008	0.0218065	0.0541947	Ileum_5_Bl-04/Ileum_5_control
Ileum_5_Bl-04/Ileum_5_control	Ileum	5	Bl-04	path:mmu04213	Longevity regulating pathway - multiple species	20.5673	42.9336	0.230004	-0.409059	0.674663	0.818591	0.00408049	0.0189818	0.894316	0.95603	0.025163	0.0569455	Ileum_5_Bl-04/Ileum_5_control
Ileum_5_Bl-04/Ileum_5_control	Ileum	5	Bl-04	path:mmu03015	mRNA surveillance pathway	1.40026	42.6752	1.28656	-0.807964	0.423288	0.15942	0.00774445	0.0220307	0.725637	0.421033	0.039983	0.0626134	Ileum_5_Bl-04/Ileum_5_control
Ileum_5_Bl-04/Ileum_5_control	Ileum	5	Bl-04	path:mmu04370	VEGF signaling pathway	32.3372	47.8947	3.19331	2.76301	0.007996	0.003998	0.527776	0.0272952	0.071964	0.0457549	0.650187	0.0746299	Ileum_5_Bl-04/Ileum_5_control
Ileum_5_Bl-04/Ileum_5_control	Ileum	5	Bl-04	path:mmu04140	Autophagy - animal	53.8486	103.547	-5.18511e-05	0.0432574	0.95902	1	0.00655363	0.0381477	0.986862	1	0.036455	0.0947115	Ileum_5_Bl-04/Ileum_5_control
Ileum_5_Bl-04/Ileum_5_control	Ileum	5	Bl-04	path:mmu04152	AMPK signaling pathway	25.3196	73.1721	0.439989	0.202684	0.836082	0.653173	0.00889643	0.0438935	0.963476	0.841904	0.0435274	0.104187	Ileum_5_Bl-04/Ileum_5_control
Ileum_5_Bl-04/Ileum_5_control	Ileum	5	Bl-04	path:mmu04520	Adherens junction							0.000876928				0.00927769		Ileum_5_Bl-04/Ileum_5_control
Ileum_5_Bl-04/Ileum_5_control	Ileum	5	Bl-04	path:mmu05215	Prostate cancer							0.00288945				0.020342		Ileum_5_Bl-04/Ileum_5_control
Jejunum_-14_Bl-04/Jejunum_-14_control	Jejunum	-14	Bl-04	path:mmu05169	Epstein-Barr virus infection	0	22.1765	-1.7501	-1.67904	0.0729635	0.0504748	2.52491e-07	1.272e-06	0.340739	0.293306	3.91361e-06	3.81599e-05	Jejunum_-14_Bl-04/Jejunum_-14_control
Jejunum_-14_Bl-04/Jejunum_-14_control	Jejunum	-14	Bl-04	path:mmu05310	Asthma	0	9.35527	-0.37982	-1.11841	0.207896	0.133933	2.90026e-06	9.23809e-06	0.340739	0.293306	2.2477e-05	0.000113573	Jejunum_-14_Bl-04/Jejunum_-14_control
Jejunum_-14_Bl-04/Jejunum_-14_control	Jejunum	-14	Bl-04	path:mmu04662	B cell receptor signaling pathway	6.07195	27.6988	-0.674484	-0.362262	0.752124	0.537731	2.8832e-08	1.13573e-05	0.867835	0.599777	8.93793e-07	0.000113573	Jejunum_-14_Bl-04/Jejunum_-14_control
Jejunum_-14_Bl-04/Jejunum_-14_control	Jejunum	-14	Bl-04	path:mmu04672	Intestinal immune network for IgA production	0	9.35527	-0.757339	-1.19282	0.188906	0.212394	1.85101e-05	4.74276e-05	0.340739	0.293306	0.000114763	0.000295544	Jejunum_-14_Bl-04/Jejunum_-14_control
Jejunum_-14_Bl-04/Jejunum_-14_control	Jejunum	-14	Bl-04	path:mmu05321	Inflammatory bowel disease	0	9.35527	-1.65514	-1.67429	0.0704648	0.0669665	5.1693e-05	4.92573e-05	0.340739	0.293306	0.000178054	0.000295544	Jejunum_-14_Bl-04/Jejunum_-14_control
Jejunum_-14_Bl-04/Jejunum_-14_control	Jejunum	-14	Bl-04	path:mmu05140	Leishmaniasis	0	9.35527	-1.4804	-1.60574	0.0864568	0.083958	7.91057e-05	8.8177e-05	0.340739	0.293306	0.000222934	0.000429912	Jejunum_-14_Bl-04/Jejunum_-14_control
Jejunum_-14_Bl-04/Jejunum_-14_control	Jejunum	-14	Bl-04	path:mmu05322	Systemic lupus erythematosus	0	9.35527	-0.80517	-1.09596	0.197401	0.210895	4.66028e-05	0.00011588	0.340739	0.293306	0.000178054	0.000429912	Jejunum_-14_Bl-04/Jejunum_-14_control
Jejunum_-14_Bl-04/Jejunum_-14_control	Jejunum	-14	Bl-04	path:mmu05330	Allograft rejection	0	9.35527	-0.469354	-1.10801	0.210895	0.198901	4.41862e-05	0.000117261	0.340739	0.293306	0.000178054	0.000429912	Jejunum_-14_Bl-04/Jejunum_-14_control
Jejunum_-14_Bl-04/Jejunum_-14_control	Jejunum	-14	Bl-04	path:mmu05332	Graft-versus-host disease	0	9.35527	-0.39683	-1.06409	0.233883	0.148926	4.41862e-05	0.000128974	0.340739	0.293306	0.000178054	0.000429912	Jejunum_-14_Bl-04/Jejunum_-14_control
Jejunum_-14_Bl-04/Jejunum_-14_control	Jejunum	-14	Bl-04	path:mmu04659	Th17 cell differentiation	0	9.35527	-1.92096	-1.98528	0.0449775	0.0474763	0.000271277	0.000150247	0.340739	0.293306	0.0004672	0.000450742	Jejunum_-14_Bl-04/Jejunum_-14_control
Jejunum_-14_Bl-04/Jejunum_-14_control	Jejunum	-14	Bl-04	path:mmu04940	Type I diabetes mellitus	0	9.35527	-0.368425	-1.09231	0.230885	0.129435	6.29387e-05	0.000176402	0.340739	0.293306	0.00019511	0.000481095	Jejunum_-14_Bl-04/Jejunum_-14_control
Jejunum_-14_Bl-04/Jejunum_-14_control	Jejunum	-14	Bl-04	path:mmu05320	Autoimmune thyroid disease	0	9.35527	-0.417575	-1.10364	0.21939	0.163418	9.38315e-05	0.000242724	0.340739	0.293306	0.000242398	0.000606811	Jejunum_-14_Bl-04/Jejunum_-14_control
Jejunum_-14_Bl-04/Jejunum_-14_control	Jejunum	-14	Bl-04	path:mmu04658	Th1 and Th2 cell differentiation	9.35527	18.7105	-1.18172	-1.18676	0.144428	0.149425	0.000159179	0.000268532	0.340739	0.293306	0.000308409	0.000619689	Jejunum_-14_Bl-04/Jejunum_-14_control
Jejunum_-14_Bl-04/Jejunum_-14_control	Jejunum	-14	Bl-04	path:mmu05416	Viral myocarditis	0	9.35527	-0.646636	-0.948756	0.215392	0.204898	0.00013325	0.000328872	0.340739	0.293306	0.000308409	0.000704726	Jejunum_-14_Bl-04/Jejunum_-14_control
Jejunum_-14_Bl-04/Jejunum_-14_control	Jejunum	-14	Bl-04	path:mmu05323	Rheumatoid arthritis	0	9.35527	-0.462167	-1.0651	0.232884	0.194403	0.000153752	0.000402369	0.340739	0.293306	0.000308409	0.000804738	Jejunum_-14_Bl-04/Jejunum_-14_control
Jejunum_-14_Bl-04/Jejunum_-14_control	Jejunum	-14	Bl-04	path:mmu05145	Toxoplasmosis	0	9.35527	-1.14387	-1.29628	0.133433	0.136432	0.000320449	0.000472908	0.340739	0.293306	0.000522839	0.000886702	Jejunum_-14_Bl-04/Jejunum_-14_control
Jejunum_-14_Bl-04/Jejunum_-14_control	Jejunum	-14	Bl-04	path:mmu05150	Staphylococcus aureus infection	0	9.35527	-0.718552	-0.918501	0.249875	0.251374	0.000248646	0.000663942	0.340739	0.306159	0.000453413	0.00117166	Jejunum_-14_Bl-04/Jejunum_-14_control
Jejunum_-14_Bl-04/Jejunum_-14_control	Jejunum	-14	Bl-04	path:mmu05152	Tuberculosis	0	9.35527	-1.54283	-1.65844	0.071964	0.0774613	0.00133341	0.000983716	0.340739	0.293306	0.00187889	0.00156863	Jejunum_-14_Bl-04/Jejunum_-14_control
Jejunum_-14_Bl-04/Jejunum_-14_control	Jejunum	-14	Bl-04	path:mmu04612	Antigen processing and presentation	9.35527	18.7105	1.06768	0.460926	0.677161	0.271364	0.000143262	0.000993464	0.829985	0.314783	0.000308409	0.00156863	Jejunum_-14_Bl-04/Jejunum_-14_control
Jejunum_-14_Bl-04/Jejunum_-14_control	Jejunum	-14	Bl-04	path:mmu05164	Influenza A	0	9.35527	-1.00267	-1.15716	0.150925	0.15992	0.00118814	0.0017262	0.340739	0.293306	0.00175393	0.00258929	Jejunum_-14_Bl-04/Jejunum_-14_control
Jejunum_-14_Bl-04/Jejunum_-14_control	Jejunum	-14	Bl-04	path:mmu04145	Phagosome	0	9.35527		-1.19082	0.242379		0.00116825	0.00259643	0.340739		0.00175393	0.00370919	Jejunum_-14_Bl-04/Jejunum_-14_control
Jejunum_-14_Bl-04/Jejunum_-14_control	Jejunum	-14	Bl-04	path:mmu05166	Human T-cell leukemia virus 1 infection	0	9.35527	-1.27217	-1.41603	0.113943	0.113943	0.00319473	0.00324642	0.340739	0.293306	0.00430594	0.00442693	Jejunum_-14_Bl-04/Jejunum_-14_control
Jejunum_-14_Bl-04/Jejunum_-14_control	Jejunum	-14	Bl-04	path:mmu05168	Herpes simplex virus 1 infection	0	9.35527	-0.748856	-0.912774	0.236882	0.204898	0.0117471	0.0191568	0.340739	0.293306	0.0151733	0.0249872	Jejunum_-14_Bl-04/Jejunum_-14_control
Jejunum_-14_Bl-04/Jejunum_-14_control	Jejunum	-14	Bl-04	path:mmu04514	Cell adhesion molecules							1.8425e-06				1.90391e-05		Jejunum_-14_Bl-04/Jejunum_-14_control
Jejunum_-21_Bl-04/Jejunum_-21_control	Jejunum	-21	Bl-04	path:mmu04972	Pancreatic secretion	16.6694	153.859	1.5833	4.40718	0.001999	0.0694653	4.80483e-05	1.64804e-06	0.0847576	0.362319	0.0104745	0.000349385	Jejunum_-21_Bl-04/Jejunum_-21_control
Jejunum_-21_Bl-04/Jejunum_-21_control	Jejunum	-21	Bl-04	path:mmu04080	Neuroactive ligand-receptor interaction	99.7755	387.887	2.90407	4.87296	0.00049975	0.00449775	0.00125201	9.56332e-06	0.0529735	0.228261	0.10879	0.00101371	Jejunum_-21_Bl-04/Jejunum_-21_control
Jejunum_5_Bl-04/Jejunum_5_control	Jejunum	5	Bl-04	path:mmu04740	Olfactory transduction	1364.9	2060.13	16.7639	18.5945	0.00049975	0.00049975	7.08895e-06	7.24779e-08	0.035982	0.102949	0.00157375	1.56552e-05	Jejunum_5_Bl-04/Jejunum_5_control
Jejunum_5_Bl-04/Jejunum_5_control	Jejunum	5	Bl-04	path:mmu05014	Amyotrophic lateral sclerosis	14.3004	157.383	-1.41287	-2.39116	0.017991	0.151924	0.000799434	0.000174741	0.363091	0.899612	0.0354948	0.0129269	Jejunum_5_Bl-04/Jejunum_5_control
Jejunum_5_Bl-04/Jejunum_5_control	Jejunum	5	Bl-04	path:mmu04742	Taste transduction	5.17292	69.8321	-0.162045	2.94856	0.005997	0.868566	0.00247016	0.00017954	0.18505	0.992718	0.0783394	0.0129269	Jejunum_5_Bl-04/Jejunum_5_control
Jejunum_5_Bl-04/Jejunum_5_control	Jejunum	5	Bl-04	path:mmu04144	Endocytosis	0	88.1164		-4.00214	0.00049975		0.0658623	0.000372647	0.035982		0.35797	0.0201229	Jejunum_5_Bl-04/Jejunum_5_control
Jejunum_5_Bl-04/Jejunum_5_control	Jejunum	5	Bl-04	path:mmu05202	Transcriptional misregulation in cancer	1.63708	63.8723	0.647795	-3.49952	0.00149925	0.845077	0.0565853	0.000880152	0.0809595	0.992718	0.35797	0.0380226	Jejunum_5_Bl-04/Jejunum_5_control
Jejunum_5_Bl-04/Jejunum_5_control	Jejunum	5	Bl-04	path:mmu04979	Cholesterol metabolism	6.04245	40.3997	0.00572612	-0.3906	0.691154	0.996502	0.00017265	0.00119729	0.949925	0.998501	0.0150917	0.0431025	Jejunum_5_Bl-04/Jejunum_5_control
Jejunum_5_Bl-04/Jejunum_5_control	Jejunum	5	Bl-04	path:mmu05022	Pathways of neurodegeneration - multiple diseases	95.1973	280.052	0.371644	-0.252164	0.805097	0.702149	0.000203942	0.00159505	0.982492	0.979516	0.0150917	0.0492187	Jejunum_5_Bl-04/Jejunum_5_control
Jejunum_5_Bl-04/Jejunum_5_control	Jejunum	5	Bl-04	path:mmu04080	Neuroactive ligand-receptor interaction	35.1405	167.146	1.68706	4.34718	0.00049975	0.0924538	0.935543	0.00405263	0.035982	0.899612	0.978265	0.0795789	Jejunum_5_Bl-04/Jejunum_5_control
Jejunum_5_Bl-04/Jejunum_5_control	Jejunum	5	Bl-04	path:mmu04520	Adherens junction							0.00034953				0.0193989		Jejunum_5_Bl-04/Jejunum_5_control
Jejunum_7_Bl-04/Jejunum_7_control	Jejunum	7	Bl-04	path:mmu04913	Ovarian steroidogenesis	0	10.138	-0.71492	-0.298625	0.783108	0.203398	0.00108226	0.00684223	0.825439	0.296252	0.0365979	0.150468	Jejunum_7_Bl-04/Jejunum_7_control
Jejunum_7_Bl-04/Jejunum_7_control	Jejunum	7	Bl-04	path:mmu04927	Cortisol synthesis and secretion	0	10.138	-1.05881	-0.567438	0.571214	0.148426	0.00170223	0.00771629	0.755572	0.296252	0.0365979	0.150468	Jejunum_7_Bl-04/Jejunum_7_control
LungL_-18_Bl-04/LungL_-18_control	LungL	-18	Bl-04	path:mmu05150	Staphylococcus aureus infection	0	18.7124	-0.381155	0.33715	0.578211	0.150425	0.0044786	0.0180138	0.963518	0.205897	0.00679424	0.0421214	LungL_-18_Bl-04/LungL_-18_control
LungL_-18_Bl-04/LungL_-18_control	LungL	-18	Bl-04	path:mmu04657	IL-17 signaling pathway	0	18.7124	-0.737532	-0.13893	0.963518	0.201399	0.00452949	0.0280809	0.963518	0.205897	0.00679424	0.0421214	LungL_-18_Bl-04/LungL_-18_control
LungL_-18_Bl-04/LungL_-18_control	LungL	-18	Bl-04	path:mmu04621	NOD-like receptor signaling pathway	0	18.7124	-0.696489	-0.10109	0.961519	0.205897	0.00936434	0.0514136	0.963518	0.205897	0.00936434	0.0514136	LungL_-18_Bl-04/LungL_-18_control
LungL_-21_Bl-04/LungL_-21_control	LungL	-21	Bl-04	path:mmu04080	Neuroactive ligand-receptor interaction	375.28	1536.06	5.57737	7.89584	0.00049975	0.00049975	5.99953e-17	1.12029e-08	0.00196266	0.00514743	6.65948e-15	1.20991e-06	LungL_-21_Bl-04/LungL_-21_control
LungL_-21_Bl-04/LungL_-21_control	LungL	-21	Bl-04	path:mmu04740	Olfactory transduction	7562.1	11422	25.7971	26.8048	0.00049975	0.00049975	2.36087e-109	1.12029e-08	0.00196266	0.00514743	5.24114e-107	1.20991e-06	LungL_-21_Bl-04/LungL_-21_control
LungL_-21_Bl-04/LungL_-21_control	LungL	-21	Bl-04	path:mmu04060	Cytokine-cytokine receptor interaction	421.726	1063.84	4.98001	2.97048	0.003998	0.00049975	0.00062893	3.49345e-05	0.00855018	0.00514743	0.0465408	0.00251529	LungL_-21_Bl-04/LungL_-21_control
LungL_-21_Bl-04/LungL_-21_control	LungL	-21	Bl-04	path:mmu04512	ECM-receptor interaction	56.9324	206.407	-3.40931	-4.08466	0.00049975	0.00049975	0.0233052	0.00014396	0.00196266	0.00514743	0.517376	0.00777384	LungL_-21_Bl-04/LungL_-21_control
LungL_-21_Bl-04/LungL_-21_control	LungL	-21	Bl-04	path:mmu04950	Maturity onset diabetes of the young	65.5114	166.013	2.59698	3.35787	0.00249875	0.00649675	0.00662012	0.000198663	0.00627593	0.0238988	0.244944	0.00858225	LungL_-21_Bl-04/LungL_-21_control
LungL_-21_Bl-04/LungL_-21_control	LungL	-21	Bl-04	path:mmu04742	Taste transduction	52.5645	257.802	1.87966	3.03327	0.0029985	0.0534733	0.0118581	0.000399813	0.0071964	0.115953	0.329064	0.014068	LungL_-21_Bl-04/LungL_-21_control
LungL_-21_Bl-04/LungL_-21_control	LungL	-21	Bl-04	path:mmu05143	African trypanosomiasis	18.1215	82.7659	-1.67088	-2.58015	0.007996	0.0964518	0.00844781	0.000716196	0.0155598	0.177402	0.267916	0.014068	LungL_-21_Bl-04/LungL_-21_control
LungL_-21_Bl-04/LungL_-21_control	LungL	-21	Bl-04	path:mmu04728	Dopaminergic synapse	84.7354	279.601	-3.09943	-3.3578	0.0009995	0.00249875	0.0851601	0.000882795	0.00317488	0.0147069	0.925338	0.014068	LungL_-21_Bl-04/LungL_-21_control
LungL_-21_Bl-04/LungL_-21_control	LungL	-21	Bl-04	path:mmu04921	Oxytocin signaling pathway	89.4773	334.57	-3.92141	-4.26627	0.00049975	0.00149925	0.19444	0.000994941	0.00196266	0.0106498	1	0.014068	LungL_-21_Bl-04/LungL_-21_control
LungL_-21_Bl-04/LungL_-21_control	LungL	-21	Bl-04	path:mmu05207	Chemical carcinogenesis - receptor activation	117.059	477.811	-3.99522	-4.22904	0.00049975	0.00049975	0.219181	0.00110842	0.00196266	0.00514743	1	0.014068	LungL_-21_Bl-04/LungL_-21_control
LungL_-21_Bl-04/LungL_-21_control	LungL	-21	Bl-04	path:mmu05320	Autoimmune thyroid disease	6.30816	242.55	-0.860217	2.18328	0.0304848	0.398801	0.00387766	0.00118718	0.0487756	0.497897	0.172168	0.014068	LungL_-21_Bl-04/LungL_-21_control
LungL_-21_Bl-04/LungL_-21_control	LungL	-21	Bl-04	path:mmu04540	Gap junction	35.3664	124.44	-3.23232	-3.92901	0.00049975	0.00149925	0.242003	0.00121186	0.00196266	0.0106498	1	0.014068	LungL_-21_Bl-04/LungL_-21_control
LungL_-21_Bl-04/LungL_-21_control	LungL	-21	Bl-04	path:mmu05030	Cocaine addiction	17.1108	102.231	-2.7986	-2.58735	0.00949525	0.003998	0.0151079	0.00141294	0.0183123	0.0200875	0.372662	0.014068	LungL_-21_Bl-04/LungL_-21_control
LungL_-21_Bl-04/LungL_-21_control	LungL	-21	Bl-04	path:mmu05142	Chagas disease	92.944	211.983	-3.32927	-4.06758	0.00049975	0.0009995	0.381914	0.00182539	0.00196266	0.00857904	1	0.014068	LungL_-21_Bl-04/LungL_-21_control
LungL_-21_Bl-04/LungL_-21_control	LungL	-21	Bl-04	path:mmu05146	Amoebiasis	43.764	194.35	-1.80122	-3.6863	0.0009995	0.071964	0.195211	0.00186176	0.00317488	0.142544	1	0.014068	LungL_-21_Bl-04/LungL_-21_control
LungL_-21_Bl-04/LungL_-21_control	LungL	-21	Bl-04	path:mmu04730	Long-term depression	39.6073	118.589	-2.47078	-3.16426	0.00249875	0.0109945	0.0950215	0.00221898	0.00627593	0.0343162	0.958853	0.014068	LungL_-21_Bl-04/LungL_-21_control
LungL_-21_Bl-04/LungL_-21_control	LungL	-21	Bl-04	path:mmu04710	Circadian rhythm	0	33.9835		-4.10888	0.00049975		0.478095	0.00223143	0.00196266		1	0.014068	LungL_-21_Bl-04/LungL_-21_control
LungL_-21_Bl-04/LungL_-21_control	LungL	-21	Bl-04	path:mmu04261	Adrenergic signaling in cardiomyocytes	70.801	284.846	-2.70439	-3.76234	0.00049975	0.007996	0.498036	0.00231433	0.00196266	0.0283996	1	0.014068	LungL_-21_Bl-04/LungL_-21_control
LungL_-21_Bl-04/LungL_-21_control	LungL	-21	Bl-04	path:mmu04660	T cell receptor signaling pathway	65.2676	190.042	-3.51877	-4.05548	0.00049975	0.00049975	0.607175	0.00276137	0.00196266	0.00514743	1	0.014068	LungL_-21_Bl-04/LungL_-21_control
LungL_-21_Bl-04/LungL_-21_control	LungL	-21	Bl-04	path:mmu05034	Alcoholism	54.9693	264.157	-3.71397	-3.4522	0.0009995	0.00049975	0.314492	0.00284946	0.00317488	0.00514743	1	0.014068	LungL_-21_Bl-04/LungL_-21_control
LungL_-21_Bl-04/LungL_-21_control	LungL	-21	Bl-04	path:mmu05231	Choline metabolism in cancer	23.285	130.346	-3.72572	-4.5464	0.00049975	0.0009995	0.644733	0.00291284	0.00196266	0.00857904	1	0.014068	LungL_-21_Bl-04/LungL_-21_control
LungL_-21_Bl-04/LungL_-21_control	LungL	-21	Bl-04	path:mmu04510	Focal adhesion	173.408	390.373	-5.08199	-5.66687	0.00049975	0.00049975	0.712321	0.00318271	0.00196266	0.00514743	1	0.014068	LungL_-21_Bl-04/LungL_-21_control
LungL_-21_Bl-04/LungL_-21_control	LungL	-21	Bl-04	path:mmu04936	Alcoholic liver disease	68.2904	250.131	-4.187	-4.53962	0.00049975	0.00049975	0.728664	0.00324747	0.00196266	0.00514743	1	0.014068	LungL_-21_Bl-04/LungL_-21_control
LungL_-21_Bl-04/LungL_-21_control	LungL	-21	Bl-04	path:mmu04146	Peroxisome	0	116.741		-4.17846	0.00049975		0.757466	0.00336116	0.00196266		1	0.014068	LungL_-21_Bl-04/LungL_-21_control
LungL_-21_Bl-04/LungL_-21_control	LungL	-21	Bl-04	path:mmu05140	Leishmaniasis	32.7312	98.4634	-2.76045	-3.86572	0.00049975	0.0049975	0.761219	0.00337593	0.00196266	0.0214476	1	0.014068	LungL_-21_Bl-04/LungL_-21_control
LungL_-21_Bl-04/LungL_-21_control	LungL	-21	Bl-04	path:mmu05230	Central carbon metabolism in cancer	43.9768	120.537	-3.23873	-3.60079	0.00049975	0.00049975	0.768854	0.00340596	0.00196266	0.00514743	1	0.014068	LungL_-21_Bl-04/LungL_-21_control
LungL_-21_Bl-04/LungL_-21_control	LungL	-21	Bl-04	path:mmu05221	Acute myeloid leukemia	12.5281	78.7102	-2.96126	-4.15978	0.00049975	0.00449775	0.800805	0.0035312	0.00196266	0.0205897	1	0.014068	LungL_-21_Bl-04/LungL_-21_control
LungL_-21_Bl-04/LungL_-21_control	LungL	-21	Bl-04	path:mmu05145	Toxoplasmosis	44.3902	147.271	-2.79652	-4.25229	0.00049975	0.00549725	0.801427	0.00353363	0.00196266	0.0222046	1	0.014068	LungL_-21_Bl-04/LungL_-21_control
LungL_-21_Bl-04/LungL_-21_control	LungL	-21	Bl-04	path:mmu04071	Sphingolipid signaling pathway	88.7499	197.842	-3.83088	-4.57473	0.00049975	0.00049975	0.805702	0.00355034	0.00196266	0.00514743	1	0.014068	LungL_-21_Bl-04/LungL_-21_control
LungL_-21_Bl-04/LungL_-21_control	LungL	-21	Bl-04	path:mmu04611	Platelet activation	73.5386	185.567	-4.06013	-4.75504	0.00049975	0.00049975	0.811023	0.00357112	0.00196266	0.00514743	1	0.014068	LungL_-21_Bl-04/LungL_-21_control
LungL_-21_Bl-04/LungL_-21_control	LungL	-21	Bl-04	path:mmu04145	Phagosome	0	262.874		-3.77177	0.00049975		0.827387	0.00363492	0.00196266		1	0.014068	LungL_-21_Bl-04/LungL_-21_control
LungL_-21_Bl-04/LungL_-21_control	LungL	-21	Bl-04	path:mmu04010	MAPK signaling pathway	151.776	524.199	-3.31972	-5.27678	0.00049975	0.001999	0.867153	0.00378927	0.00196266	0.0124786	1	0.014068	LungL_-21_Bl-04/LungL_-21_control
LungL_-21_Bl-04/LungL_-21_control	LungL	-21	Bl-04	path:mmu04014	Ras signaling pathway	390.077	706.675	-3.25699	-3.76167	0.00049975	0.00049975	0.888027	0.00386993	0.00196266	0.00514743	1	0.014068	LungL_-21_Bl-04/LungL_-21_control
LungL_-21_Bl-04/LungL_-21_control	LungL	-21	Bl-04	path:mmu04152	AMPK signaling pathway	58.2672	192.153	-2.05799	-3.72525	0.00049975	0.0389805	0.91342	0.00396772	0.00196266	0.0913813	1	0.014068	LungL_-21_Bl-04/LungL_-21_control
LungL_-21_Bl-04/LungL_-21_control	LungL	-21	Bl-04	path:mmu04933	AGE-RAGE signaling pathway in diabetic complications	43.7766	133.089	-3.39807	-4.59251	0.00049975	0.0009995	0.913986	0.0039699	0.00196266	0.00857904	1	0.014068	LungL_-21_Bl-04/LungL_-21_control
LungL_-21_Bl-04/LungL_-21_control	LungL	-21	Bl-04	path:mmu05163	Human cytomegalovirus infection	175.578	493.169	-4.74749	-5.05183	0.00049975	0.00049975	0.942099	0.00407774	0.00196266	0.00514743	1	0.014068	LungL_-21_Bl-04/LungL_-21_control
LungL_-21_Bl-04/LungL_-21_control	LungL	-21	Bl-04	path:mmu04371	Apelin signaling pathway	83.9274	215.852	-3.56051	-4.32215	0.00049975	0.00049975	0.943382	0.00408266	0.00196266	0.00514743	1	0.014068	LungL_-21_Bl-04/LungL_-21_control
LungL_-21_Bl-04/LungL_-21_control	LungL	-21	Bl-04	path:mmu05170	Human immunodeficiency virus 1 infection	235.376	554.812	-3.95122	-4.05662	0.00049975	0.00049975	0.949606	0.00410647	0.00196266	0.00514743	1	0.014068	LungL_-21_Bl-04/LungL_-21_control
LungL_-21_Bl-04/LungL_-21_control	LungL	-21	Bl-04	path:mmu04015	Rap1 signaling pathway	373.42	592.344	-3.88808	-4.71711	0.00049975	0.00049975	0.949625	0.00410654	0.00196266	0.00514743	1	0.014068	LungL_-21_Bl-04/LungL_-21_control
LungL_-21_Bl-04/LungL_-21_control	LungL	-21	Bl-04	path:mmu04722	Neurotrophin signaling pathway	94.0686	197.958	-3.99099	-4.80476	0.00049975	0.00049975	0.955231	0.00412797	0.00196266	0.00514743	1	0.014068	LungL_-21_Bl-04/LungL_-21_control
LungL_-21_Bl-04/LungL_-21_control	LungL	-21	Bl-04	path:mmu04912	GnRH signaling pathway	32.3033	109.28	-2.81816	-3.59038	0.00049975	0.0029985	0.963009	0.00415769	0.00196266	0.0166944	1	0.014068	LungL_-21_Bl-04/LungL_-21_control
LungL_-21_Bl-04/LungL_-21_control	LungL	-21	Bl-04	path:mmu05206	MicroRNAs in cancer	0	189.057		-6.35632	0.00049975		0.96313	0.00415815	0.00196266		1	0.014068	LungL_-21_Bl-04/LungL_-21_control
LungL_-21_Bl-04/LungL_-21_control	LungL	-21	Bl-04	path:mmu04659	Th17 cell differentiation	139.118	257.524	-2.39472	-3.30669	0.0009995	0.0154923	0.48214	0.00416254	0.00317488	0.0469324	1	0.014068	LungL_-21_Bl-04/LungL_-21_control
LungL_-21_Bl-04/LungL_-21_control	LungL	-21	Bl-04	path:mmu04210	Apoptosis	99.1899	210.922	-3.31824	-4.2574	0.00049975	0.00249875	0.968934	0.0041803	0.00196266	0.0147069	1	0.014068	LungL_-21_Bl-04/LungL_-21_control
LungL_-21_Bl-04/LungL_-21_control	LungL	-21	Bl-04	path:mmu05417	Lipid and atherosclerosis	120.786	377.537	-4.99967	-5.31874	0.00049975	0.00049975	0.971812	0.00419127	0.00196266	0.00514743	1	0.014068	LungL_-21_Bl-04/LungL_-21_control
LungL_-21_Bl-04/LungL_-21_control	LungL	-21	Bl-04	path:mmu05205	Proteoglycans in cancer	349.905	532.194	-3.05861	-4.2382	0.00049975	0.00349825	0.97377	0.00419874	0.00196266	0.0184779	1	0.014068	LungL_-21_Bl-04/LungL_-21_control
LungL_-21_Bl-04/LungL_-21_control	LungL	-21	Bl-04	path:mmu05210	Colorectal cancer	34.1249	95.7846	-2.81912	-4.05618	0.00049975	0.0049975	0.977475	0.00421286	0.00196266	0.0214476	1	0.014068	LungL_-21_Bl-04/LungL_-21_control
LungL_-21_Bl-04/LungL_-21_control	LungL	-21	Bl-04	path:mmu05220	Chronic myeloid leukemia	18.958	73.1419	-3.1312	-4.23741	0.00049975	0.001999	0.981377	0.00422772	0.00196266	0.0124786	1	0.014068	LungL_-21_Bl-04/LungL_-21_control
LungL_-21_Bl-04/LungL_-21_control	LungL	-21	Bl-04	path:mmu05135	Yersinia infection	202.945	312.662	-3.48119	-4.15927	0.00049975	0.00149925	0.983469	0.00423568	0.00196266	0.0106498	1	0.014068	LungL_-21_Bl-04/LungL_-21_control
LungL_-21_Bl-04/LungL_-21_control	LungL	-21	Bl-04	path:mmu05211	Renal cell carcinoma	18.2859	64.3391	-2.28377	-3.89427	0.00049975	0.0169915	0.985364	0.0042429	0.00196266	0.0500036	1	0.014068	LungL_-21_Bl-04/LungL_-21_control
LungL_-21_Bl-04/LungL_-21_control	LungL	-21	Bl-04	path:mmu05166	Human T-cell leukemia virus 1 infection	123.791	420.776	-4.06495	-5.04385	0.00049975	0.0009995	0.988438	0.0042546	0.00196266	0.00857904	1	0.014068	LungL_-21_Bl-04/LungL_-21_control
LungL_-21_Bl-04/LungL_-21_control	LungL	-21	Bl-04	path:mmu05212	Pancreatic cancer	38.0741	83.3288	-2.34196	-3.90904	0.00049975	0.0164918	0.994511	0.00427769	0.00196266	0.0492363	1	0.014068	LungL_-21_Bl-04/LungL_-21_control
LungL_-21_Bl-04/LungL_-21_control	LungL	-21	Bl-04	path:mmu04666	Fc gamma R-mediated phagocytosis	28.3479	100.163	-3.00593	-4.22134	0.00049975	0.00449775	0.994713	0.00427846	0.00196266	0.0205897	1	0.014068	LungL_-21_Bl-04/LungL_-21_control
LungL_-21_Bl-04/LungL_-21_control	LungL	-21	Bl-04	path:mmu05017	Spinocerebellar ataxia	24.543	164.007	-1.67459	-4.72421	0.00049975	0.083958	0.994981	0.00427948	0.00196266	0.159617	1	0.014068	LungL_-21_Bl-04/LungL_-21_control
LungL_-21_Bl-04/LungL_-21_control	LungL	-21	Bl-04	path:mmu04137	Mitophagy - animal	28.035	65.7902	-2.13323	-3.9063	0.00049975	0.0394803	0.99737	0.00428856	0.00196266	0.0913813	1	0.014068	LungL_-21_Bl-04/LungL_-21_control
LungL_-21_Bl-04/LungL_-21_control	LungL	-21	Bl-04	path:mmu04919	Thyroid hormone signaling pathway	15.8113	114.625	-2.7972	-4.63358	0.00049975	0.00449775	0.998044	0.00429112	0.00196266	0.0205897	1	0.014068	LungL_-21_Bl-04/LungL_-21_control
LungL_-21_Bl-04/LungL_-21_control	LungL	-21	Bl-04	path:mmu05418	Fluid shear stress and atherosclerosis	56.1136	184.398	-3.33346	-4.52522	0.00049975	0.00149925	0.998282	0.00429202	0.00196266	0.0106498	1	0.014068	LungL_-21_Bl-04/LungL_-21_control
LungL_-21_Bl-04/LungL_-21_control	LungL	-21	Bl-04	path:mmu05202	Transcriptional misregulation in cancer	2.11833	237.9	-0.404295	-4.12538	0.00049975	0.813593	0.998346	0.00429227	0.00196266	0.854421	1	0.014068	LungL_-21_Bl-04/LungL_-21_control
LungL_-21_Bl-04/LungL_-21_control	LungL	-21	Bl-04	path:mmu04625	C-type lectin receptor signaling pathway	61.4241	171.997	-3.47564	-3.83685	0.00049975	0.00049975	0.998927	0.00429447	0.00196266	0.00514743	1	0.014068	LungL_-21_Bl-04/LungL_-21_control
LungL_-21_Bl-04/LungL_-21_control	LungL	-21	Bl-04	path:mmu04380	Osteoclast differentiation	77.5258	173.868	-2.79323	-3.88936	0.00049975	0.005997	0.998937	0.00429451	0.00196266	0.0224615	1	0.014068	LungL_-21_Bl-04/LungL_-21_control
LungL_-21_Bl-04/LungL_-21_control	LungL	-21	Bl-04	path:mmu05203	Viral carcinogenesis	0.154698	236.948	-1.38351	-4.69076	0.00049975	0.175912	0.999073	0.00429503	0.00196266	0.280914	1	0.014068	LungL_-21_Bl-04/LungL_-21_control
LungL_-21_Bl-04/LungL_-21_control	LungL	-21	Bl-04	path:mmu04144	Endocytosis	0	289.469		-6.77796	0.00049975		0.999994	0.00429853	0.00196266		1	0.014068	LungL_-21_Bl-04/LungL_-21_control
LungL_-21_Bl-04/LungL_-21_control	LungL	-21	Bl-04	path:mmu05132	Salmonella infection	249.839	460.922	-3.46083	-4.38466	0.00049975	0.00149925	0.999999	0.00429855	0.00196266	0.0106498	1	0.014068	LungL_-21_Bl-04/LungL_-21_control
LungL_-21_Bl-04/LungL_-21_control	LungL	-21	Bl-04	path:mmu05022	Pathways of neurodegeneration - multiple diseases	250.925	667.751	-2.01783	-4.7372	0.00049975	0.0424788	1	0.00429855	0.00196266	0.0961607	1	0.014068	LungL_-21_Bl-04/LungL_-21_control
LungL_-21_Bl-04/LungL_-21_control	LungL	-21	Bl-04	path:mmu05012	Parkinson disease	43.0662	250.239	-1.45565	-3.76899	0.00049975	0.142429	1	0.00429855	0.00196266	0.242482	1	0.014068	LungL_-21_Bl-04/LungL_-21_control
LungL_-21_Bl-04/LungL_-21_control	LungL	-21	Bl-04	path:mmu05016	Huntington disease	12.6469	243.385	-1.82938	-5.52124	0.00049975	0.0664668	1	0.00429855	0.00196266	0.134237	1	0.014068	LungL_-21_Bl-04/LungL_-21_control
LungL_-21_Bl-04/LungL_-21_control	LungL	-21	Bl-04	path:mmu04330	Notch signaling pathway	18.6753	72.3011	-1.5605	-3.38557	0.00149925	0.105947	0.36793	0.00469023	0.00437619	0.193142	1	0.0151207	LungL_-21_Bl-04/LungL_-21_control
LungL_-21_Bl-04/LungL_-21_control	LungL	-21	Bl-04	path:mmu04810	Regulation of actin cytoskeleton	502.221	770.136	-2.85774	-3.57228	0.0009995	0.0049975	0.617675	0.00517973	0.00317488	0.0214476	1	0.0164533	LungL_-21_Bl-04/LungL_-21_control
LungL_-21_Bl-04/LungL_-21_control	LungL	-21	Bl-04	path:mmu04151	PI3K-Akt signaling pathway	678.925	1200.33	-2.58032	-3.52789	0.00149925	0.00849575	0.471396	0.00583404	0.00437619	0.0291687	1	0.0180504	LungL_-21_Bl-04/LungL_-21_control
LungL_-21_Bl-04/LungL_-21_control	LungL	-21	Bl-04	path:mmu05323	Rheumatoid arthritis	5.57645	118.555	-1.07368	-3.78035	0.0009995	0.285857	0.709251	0.00584967	0.00317488	0.400589	1	0.0180504	LungL_-21_Bl-04/LungL_-21_control
LungL_-21_Bl-04/LungL_-21_control	LungL	-21	Bl-04	path:mmu04713	Circadian entrainment	135.171	297.701	-2.12931	-2.59523	0.009995	0.0374813	0.0736816	0.00604894	0.0191055	0.0897807	0.904285	0.0181821	LungL_-21_Bl-04/LungL_-21_control
LungL_-21_Bl-04/LungL_-21_control	LungL	-21	Bl-04	path:mmu04670	Leukocyte transendothelial migration	65.5494	207.268	-2.50925	-3.49882	0.00149925	0.009995	0.49472	0.00608688	0.00437619	0.0326821	1	0.0181821	LungL_-21_Bl-04/LungL_-21_control
LungL_-21_Bl-04/LungL_-21_control	LungL	-21	Bl-04	path:mmu04613	Neutrophil extracellular trap formation	16.6783	157.021	-2.95388	-4.50829	0.0009995	0.003998	0.750137	0.00614487	0.00317488	0.0200875	1	0.0181821	LungL_-21_Bl-04/LungL_-21_control
LungL_-21_Bl-04/LungL_-21_control	LungL	-21	Bl-04	path:mmu05152	Tuberculosis	174.222	424.635	-3.10946	-3.44748	0.0009995	0.001999	0.844032	0.00681453	0.00317488	0.0124786	1	0.0198911	LungL_-21_Bl-04/LungL_-21_control
LungL_-21_Bl-04/LungL_-21_control	LungL	-21	Bl-04	path:mmu04928	Parathyroid hormone synthesis, secretion and action	143.646	276.631	-1.8399	-3.13799	0.0029985	0.0654673	0.291306	0.00702542	0.0071964	0.134237	1	0.0202332	LungL_-21_Bl-04/LungL_-21_control
LungL_-21_Bl-04/LungL_-21_control	LungL	-21	Bl-04	path:mmu04216	Ferroptosis	0	35.7602	-0.781527	-3.78333	0.0009995	0.247876	0.892147	0.00715356	0.00317488	0.362145	1	0.02029	LungL_-21_Bl-04/LungL_-21_control
LungL_-21_Bl-04/LungL_-21_control	LungL	-21	Bl-04	path:mmu05222	Small cell lung cancer	68.0653	168.876	-2.72394	-3.42499	0.0009995	0.005997	0.903478	0.00723302	0.00317488	0.0224615	1	0.02029	LungL_-21_Bl-04/LungL_-21_control
LungL_-21_Bl-04/LungL_-21_control	LungL	-21	Bl-04	path:mmu04932	Non-alcoholic fatty liver disease	86.3119	177.896	-1.67802	-3.38081	0.0009995	0.0924538	1	0.0079043	0.00317488	0.173141	1	0.0213416	LungL_-21_Bl-04/LungL_-21_control
LungL_-21_Bl-04/LungL_-21_control	LungL	-21	Bl-04	path:mmu05020	Prion disease	27.7584	258.665	-2.56185	-3.58108	0.0009995	0.00849575	1	0.0079043	0.00317488	0.0291687	1	0.0213416	LungL_-21_Bl-04/LungL_-21_control
LungL_-21_Bl-04/LungL_-21_control	LungL	-21	Bl-04	path:mmu05014	Amyotrophic lateral sclerosis	37.5118	355.629	-1.87669	-4.67112	0.0009995	0.0594703	1	0.0079043	0.00317488	0.125009	1	0.0213416	LungL_-21_Bl-04/LungL_-21_control
LungL_-21_Bl-04/LungL_-21_control	LungL	-21	Bl-04	path:mmu04620	Toll-like receptor signaling pathway	70.4248	229.109	-3.27529	-3.29876	0.00249875	0.0029985	0.505023	0.00968544	0.00627593	0.0166944	1	0.0257985	LungL_-21_Bl-04/LungL_-21_control
LungL_-21_Bl-04/LungL_-21_control	LungL	-21	Bl-04	path:mmu04066	HIF-1 signaling pathway	118.799	250.18	-2.15776	-3.03574	0.001999	0.023988	0.654916	0.00999997	0.00533067	0.0641757	1	0.0257985	LungL_-21_Bl-04/LungL_-21_control
LungL_-21_Bl-04/LungL_-21_control	LungL	-21	Bl-04	path:mmu04664	Fc epsilon RI signaling pathway	45.7918	104.487	-2.74396	-3.22904	0.00149925	0.00549725	0.874046	0.0100082	0.00437619	0.0222046	1	0.0257985	LungL_-21_Bl-04/LungL_-21_control
LungL_-21_Bl-04/LungL_-21_control	LungL	-21	Bl-04	path:mmu04720	Long-term potentiation	45.2125	112.121	-3.06457	-3.40728	0.001999	0.00349825	0.657387	0.0100327	0.00533067	0.0184779	1	0.0257985	LungL_-21_Bl-04/LungL_-21_control
LungL_-21_Bl-04/LungL_-21_control	LungL	-21	Bl-04	path:mmu04726	Serotonergic synapse	125.568	412.308	-1.0562	-0.8131	0.409295	0.289855	0.00335431	0.0104215	0.465304	0.403447	0.172168	0.0264828	LungL_-21_Bl-04/LungL_-21_control
LungL_-21_Bl-04/LungL_-21_control	LungL	-21	Bl-04	path:mmu01521	EGFR tyrosine kinase inhibitor resistance	149.226	203.205	-2.88024	-3.21895	0.00149925	0.00549725	0.97614	0.0110155	0.00437619	0.0222046	1	0.0276669	LungL_-21_Bl-04/LungL_-21_control
LungL_-21_Bl-04/LungL_-21_control	LungL	-21	Bl-04	path:mmu05415	Diabetic cardiomyopathy	48.8537	209.614	-1.04191	-3.59212	0.00149925	0.312344	1	0.0112486	0.00437619	0.427372	1	0.0279275	LungL_-21_Bl-04/LungL_-21_control
LungL_-21_Bl-04/LungL_-21_control	LungL	-21	Bl-04	path:mmu05235	PD-L1 expression and PD-1 checkpoint pathway in cancer	140.296	227.969	-2.50131	-3.05236	0.001999	0.00949525	0.897674	0.0131409	0.00533067	0.0315487	1	0.0322548	LungL_-21_Bl-04/LungL_-21_control
LungL_-21_Bl-04/LungL_-21_control	LungL	-21	Bl-04	path:mmu04115	p53 signaling pathway	28.8722	90.3713	-1.20848	-3.49521	0.001999	0.233883	0.929698	0.0135445	0.00533067	0.352114	1	0.0328721	LungL_-21_Bl-04/LungL_-21_control
LungL_-21_Bl-04/LungL_-21_control	LungL	-21	Bl-04	path:mmu01522	Endocrine resistance	127.479	196.934	-2.56784	-3.20962	0.001999	0.007996	0.966363	0.014004	0.00533067	0.0283996	1	0.0333929	LungL_-21_Bl-04/LungL_-21_control
LungL_-21_Bl-04/LungL_-21_control	LungL	-21	Bl-04	path:mmu04370	VEGF signaling pathway	34.4811	83.5792	-2.85494	-3.24824	0.001999	0.005997	0.971517	0.0140683	0.00533067	0.0224615	1	0.0333929	LungL_-21_Bl-04/LungL_-21_control
LungL_-21_Bl-04/LungL_-21_control	LungL	-21	Bl-04	path:mmu04064	NF-kappa B signaling pathway	55.4508	148.12	-2.1659	-3.49502	0.001999	0.033983	0.988251	0.0142769	0.00533067	0.0833393	1	0.0335197	LungL_-21_Bl-04/LungL_-21_control
LungL_-21_Bl-04/LungL_-21_control	LungL	-21	Bl-04	path:mmu04935	Growth hormone synthesis, secretion and action	350.603	471.298	-2.35942	-2.89051	0.003998	0.021989	0.527633	0.0151066	0.00855018	0.0603965	1	0.0348954	LungL_-21_Bl-04/LungL_-21_control
LungL_-21_Bl-04/LungL_-21_control	LungL	-21	Bl-04	path:mmu04072	Phospholipase D signaling pathway	248.833	415.45	-2.01665	-3.09908	0.00349825	0.0444778	0.613198	0.0153259	0.00803853	0.0995915	1	0.0348954	LungL_-21_Bl-04/LungL_-21_control
LungL_-21_Bl-04/LungL_-21_control	LungL	-21	Bl-04	path:mmu04360	Axon guidance	236.631	437.06	-2.46499	-3.21149	0.00249875	0.01999	0.859884	0.0153475	0.00627593	0.0556479	1	0.0348954	LungL_-21_Bl-04/LungL_-21_control
LungL_-21_Bl-04/LungL_-21_control	LungL	-21	Bl-04	path:mmu04926	Relaxin signaling pathway	342.437	470.787	-2.35218	-2.9853	0.00349825	0.017991	0.668187	0.0164996	0.00803853	0.0514743	1	0.037124	LungL_-21_Bl-04/LungL_-21_control
LungL_-21_Bl-04/LungL_-21_control	LungL	-21	Bl-04	path:mmu04530	Tight junction	105.622	272.648	-1.77771	-3.3341	0.00249875	0.073963	0.98981	0.0173185	0.00627593	0.145108	1	0.0382954	LungL_-21_Bl-04/LungL_-21_control
LungL_-21_Bl-04/LungL_-21_control	LungL	-21	Bl-04	path:mmu03460	Fanconi anemia pathway	12.6224	80.8681	-0.803972	-2.83722	0.00549725	0.441279	0.45162	0.0173748	0.0113086	0.537891	1	0.0382954	LungL_-21_Bl-04/LungL_-21_control
LungL_-21_Bl-04/LungL_-21_control	LungL	-21	Bl-04	path:mmu05223	Non-small cell lung cancer	51.964	108.575	-2.23939	-3.12245	0.0029985	0.0249875	0.945048	0.0194568	0.0071964	0.0659926	1	0.0424513	LungL_-21_Bl-04/LungL_-21_control
LungL_-21_Bl-04/LungL_-21_control	LungL	-21	Bl-04	path:mmu04668	TNF signaling pathway	36.0801	128.902	-0.768404	-3.2871	0.0029985	0.448276	0.999957	0.020418	0.0071964	0.540028	1	0.0441028	LungL_-21_Bl-04/LungL_-21_control
LungL_-21_Bl-04/LungL_-21_control	LungL	-21	Bl-04	path:mmu05133	Pertussis	44.2309	142.094	-2.34393	-2.83749	0.003998	0.0149925	0.873869	0.023257	0.00855018	0.0460964	1	0.0488192	LungL_-21_Bl-04/LungL_-21_control
LungL_-21_Bl-04/LungL_-21_control	LungL	-21	Bl-04	path:mmu03250	Viral life cycle - HIV-1	0	49.8806		-3.02673	0.00349825		0.999613	0.0232749	0.00803853		1	0.0488192	LungL_-21_Bl-04/LungL_-21_control
LungL_-21_Bl-04/LungL_-21_control	LungL	-21	Bl-04	path:mmu03015	mRNA surveillance pathway	0	101.428	-0.682669	-2.83134	0.00349825	0.229885	0.999845	0.0232795	0.00803853	0.350788	1	0.0488192	LungL_-21_Bl-04/LungL_-21_control
LungL_-21_Bl-04/LungL_-21_control	LungL	-21	Bl-04	path:mmu05321	Inflammatory bowel disease	186.906	275.047	-2.17459	-2.28015	0.0224888	0.0304848	0.161927	0.02409	0.039174	0.0784983	1	0.0500331	LungL_-21_Bl-04/LungL_-21_control
LungL_-21_Bl-04/LungL_-21_control	LungL	-21	Bl-04	path:mmu04723	Retrograde endocannabinoid signaling	20.7441	193.326	-1.56255	-2.92962	0.003998	0.124938	0.936819	0.0246718	0.00855018	0.219975	1	0.0507402	LungL_-21_Bl-04/LungL_-21_control
LungL_-21_Bl-04/LungL_-21_control	LungL	-21	Bl-04	path:mmu01523	Antifolate resistance	1.8987	43.9856	-1.50831	-2.46819	0.0104948	0.112444	0.371643	0.0255341	0.0198848	0.203188	1	0.0507402	LungL_-21_Bl-04/LungL_-21_control
LungL_-21_Bl-04/LungL_-21_control	LungL	-21	Bl-04	path:mmu04920	Adipocytokine signaling pathway	41.6208	118.549	-2.13493	-2.89901	0.005997	0.0274863	0.650481	0.0255376	0.0121061	0.071673	1	0.0507402	LungL_-21_Bl-04/LungL_-21_control
LungL_-21_Bl-04/LungL_-21_control	LungL	-21	Bl-04	path:mmu04130	SNARE interactions in vesicular transport	3.93375	24.6532	-1.26756	-2.99713	0.003998	0.215892	0.987468	0.0257978	0.00855018	0.334389	1	0.0507402	LungL_-21_Bl-04/LungL_-21_control
LungL_-21_Bl-04/LungL_-21_control	LungL	-21	Bl-04	path:mmu04662	B cell receptor signaling pathway	30.6128	75.2934	-1.52238	-2.93955	0.003998	0.117441	0.998699	0.0260461	0.00855018	0.20856	1	0.0507402	LungL_-21_Bl-04/LungL_-21_control
LungL_-21_Bl-04/LungL_-21_control	LungL	-21	Bl-04	path:mmu04915	Estrogen signaling pathway	145.779	367.578	-2.09542	-2.484	0.0124938	0.035982	0.319872	0.026066	0.0230654	0.0872035	1	0.0507402	LungL_-21_Bl-04/LungL_-21_control
LungL_-21_Bl-04/LungL_-21_control	LungL	-21	Bl-04	path:mmu04140	Autophagy - animal	72.9412	138.158	-2.46201	-3.65685	0.003998	0.0194903	1	0.0260748	0.00855018	0.0549999	1	0.0507402	LungL_-21_Bl-04/LungL_-21_control
LungL_-21_Bl-04/LungL_-21_control	LungL	-21	Bl-04	path:mmu05032	Morphine addiction	32.1037	178.484	-2.57874	-2.39914	0.0124938	0.0109945	0.338223	0.0273257	0.0230654	0.0343162	1	0.0526995	LungL_-21_Bl-04/LungL_-21_control
LungL_-21_Bl-04/LungL_-21_control	LungL	-21	Bl-04	path:mmu04068	FoxO signaling pathway	106.145	216.495	-1.14229	-3.19037	0.00449775	0.235882	0.978263	0.028275	0.00952465	0.352114	1	0.0540477	LungL_-21_Bl-04/LungL_-21_control
LungL_-21_Bl-04/LungL_-21_control	LungL	-21	Bl-04	path:mmu04110	Cell cycle	85.9717	187.391	-2.50735	-2.84922	0.0049975	0.0109945	0.923676	0.0294423	0.0103794	0.0343162	1	0.0557854	LungL_-21_Bl-04/LungL_-21_control
LungL_-21_Bl-04/LungL_-21_control	LungL	-21	Bl-04	path:mmu05213	Endometrial cancer	31.5224	77.7963	-2.02235	-2.90832	0.0049975	0.0394803	0.934711	0.0297385	0.0103794	0.0913813	1	0.0558567	LungL_-21_Bl-04/LungL_-21_control
LungL_-21_Bl-04/LungL_-21_control	LungL	-21	Bl-04	path:mmu04062	Chemokine signaling pathway	439.275	621.051	-2.02798	-2.75295	0.00649675	0.041979	0.921558	0.0366301	0.0128743	0.0960853	1	0.0677062	LungL_-21_Bl-04/LungL_-21_control
LungL_-21_Bl-04/LungL_-21_control	LungL	-21	Bl-04	path:mmu05100	Bacterial invasion of epithelial cells	38.6405	93.3349	-2.22612	-2.63061	0.005997	0.017991	0.999789	0.0366742	0.0121061	0.0514743	1	0.0677062	LungL_-21_Bl-04/LungL_-21_control
LungL_-21_Bl-04/LungL_-21_control	LungL	-21	Bl-04	path:mmu01524	Platinum drug resistance	33.0782	102.469	-2.08905	-2.989	0.00649675	0.0324838	0.959382	0.0378829	0.0128743	0.0816055	1	0.0693449	LungL_-21_Bl-04/LungL_-21_control
LungL_-21_Bl-04/LungL_-21_control	LungL	-21	Bl-04	path:mmu04270	Vascular smooth muscle contraction	200.028	428.085	-1.97468	-2.33767	0.0229885	0.0484758	0.309106	0.0422576	0.0397241	0.107376	1	0.0767028	LungL_-21_Bl-04/LungL_-21_control
LungL_-21_Bl-04/LungL_-21_control	LungL	-21	Bl-04	path:mmu04141	Protein processing in endoplasmic reticulum	48.3477	193.43	-0.854149	-2.87369	0.007996	0.412794	0.999989	0.0466068	0.0155598	0.512262	1	0.0838922	LungL_-21_Bl-04/LungL_-21_control
LungL_-21_Bl-04/LungL_-21_control	LungL	-21	Bl-04	path:mmu05165	Human papillomavirus infection	629.328	1162.4	-1.64834	-2.31307	0.0194903	0.0954523	0.496314	0.0545417	0.0345073	0.177146	1	0.0965657	LungL_-21_Bl-04/LungL_-21_control
LungL_-21_Bl-04/LungL_-21_control	LungL	-21	Bl-04	path:mmu04922	Glucagon signaling pathway	74.7799	182.122	-0.936587	-2.58676	0.0109945	0.345827	0.985221	0.0598496	0.0206505	0.45376	1	0.104558	LungL_-21_Bl-04/LungL_-21_control
LungL_-21_Bl-04/LungL_-21_control	LungL	-21	Bl-04	path:mmu05162	Measles	147.127	347.723	-1.9221	-2.4803	0.0134933	0.049975	0.876339	0.0642974	0.0246995	0.10952	1	0.111106	LungL_-21_Bl-04/LungL_-21_control
LungL_-21_Bl-04/LungL_-21_control	LungL	-21	Bl-04	path:mmu04925	Aldosterone synthesis and secretion	73.7606	244.814	-2.12498	-2.18642	0.0269865	0.0324838	0.457907	0.0666492	0.0435006	0.0816055	1	0.114256	LungL_-21_Bl-04/LungL_-21_control
LungL_-21_Bl-04/LungL_-21_control	LungL	-21	Bl-04	path:mmu04961	Endocrine and other factor-regulated calcium reabsorption	212.831	326.846	3.22055	2.24279	0.0234883	0.001999	0.531932	0.0672498	0.0402656	0.0124786	1	0.114378	LungL_-21_Bl-04/LungL_-21_control
LungL_-21_Bl-04/LungL_-21_control	LungL	-21	Bl-04	path:mmu05160	Hepatitis C	145.461	380.01	-2.08635	-2.47059	0.015992	0.033983	0.887126	0.0745584	0.0290275	0.0833393	1	0.125817	LungL_-21_Bl-04/LungL_-21_control
LungL_-21_Bl-04/LungL_-21_control	LungL	-21	Bl-04	path:mmu04970	Salivary secretion	29.0805	138.108	-0.941623	-2.29797	0.0194903	0.370815	0.903755	0.0887597	0.0345073	0.468637	1	0.147478	LungL_-21_Bl-04/LungL_-21_control
LungL_-21_Bl-04/LungL_-21_control	LungL	-21	Bl-04	path:mmu04211	Longevity regulating pathway	58.3351	132.399	-1.25492	-2.34725	0.017991	0.212394	0.999288	0.0902253	0.0323838	0.331463	1	0.147641	LungL_-21_Bl-04/LungL_-21_control
LungL_-21_Bl-04/LungL_-21_control	LungL	-21	Bl-04	path:mmu04150	mTOR signaling pathway	525.965	668.901	-1.6658	-2.23689	0.0214893	0.0844578	0.862263	0.0924319	0.0377372	0.159617	1	0.150115	LungL_-21_Bl-04/LungL_-21_control
LungL_-21_Bl-04/LungL_-21_control	LungL	-21	Bl-04	path:mmu04978	Mineral absorption	0	72.2536	-0.768737	-2.21151	0.0244878	0.244378	0.908001	0.106863	0.0408886	0.359584	1	0.168901	LungL_-21_Bl-04/LungL_-21_control
LungL_-21_Bl-04/LungL_-21_control	LungL	-21	Bl-04	path:mmu05219	Bladder cancer	16.8352	50.9701	-1.3813	-2.25126	0.023988	0.161919	0.940426	0.108094	0.0407985	0.273404	1	0.168901	LungL_-21_Bl-04/LungL_-21_control
LungL_-21_Bl-04/LungL_-21_control	LungL	-21	Bl-04	path:mmu05214	Glioma	148.276	217.094	-1.51832	-2.26278	0.0249875	0.130935	0.915893	0.109331	0.0408886	0.22666	1	0.168901	LungL_-21_Bl-04/LungL_-21_control
LungL_-21_Bl-04/LungL_-21_control	LungL	-21	Bl-04	path:mmu04931	Insulin resistance	128.62	228.959	-1.8362	-2.26765	0.0244878	0.065967	0.935311	0.109398	0.0408886	0.134237	1	0.168901	LungL_-21_Bl-04/LungL_-21_control
LungL_-21_Bl-04/LungL_-21_control	LungL	-21	Bl-04	path:mmu03440	Homologous recombination	3.88905	48.3201	0.862056	-2.28755	0.025987	0.234383	0.940426	0.115146	0.0422045	0.352114	1	0.172838	LungL_-21_Bl-04/LungL_-21_control
LungL_-21_Bl-04/LungL_-21_control	LungL	-21	Bl-04	path:mmu05134	Legionellosis	27.5692	82.5494	-0.994268	-2.25344	0.0249875	0.315342	0.979066	0.115241	0.0408886	0.427372	1	0.172838	LungL_-21_Bl-04/LungL_-21_control
LungL_-21_Bl-04/LungL_-21_control	LungL	-21	Bl-04	path:mmu05168	Herpes simplex virus 1 infection	205.293	725.632	-1.34294	-2.22679	0.0249875	0.175912	1	0.117176	0.0408886	0.280914	1	0.173356	LungL_-21_Bl-04/LungL_-21_control
LungL_-21_Bl-04/LungL_-21_control	LungL	-21	Bl-04	path:mmu05010	Alzheimer disease	342.026	666.408	0.895116	-2.20467	0.0309845	0.358321	1	0.138633	0.0492107	0.46424	1	0.200971	LungL_-21_Bl-04/LungL_-21_control
LungL_-21_Bl-04/LungL_-21_control	LungL	-21	Bl-04	path:mmu04217	Necroptosis	577.068	762.188	2.77563	1.79895	0.0794603	0.00449775	0.865771	0.252932	0.110732	0.0205897	1	0.319493	LungL_-21_Bl-04/LungL_-21_control
LungL_-21_Bl-04/LungL_-21_control	LungL	-21	Bl-04	path:mmu04622	RIG-I-like receptor signaling pathway	16.6621	156.131	-2.5299	-1.27104	0.197901	0.00949525	0.800805	0.450421	0.252939	0.0315487	1	0.514766	LungL_-21_Bl-04/LungL_-21_control
LungL_-21_Bl-04/LungL_-21_control	LungL	-21	Bl-04	path:mmu03018	RNA degradation	22.6182	76.3963	3.43048	-0.375122	0.707146	0.005997	1	0.952185	0.74825	0.0224615	1	0.965596	LungL_-21_Bl-04/LungL_-21_control
LungL_0_Bl-04/LungL_0_control	LungL	0	Bl-04	path:mmu04371	Apelin signaling pathway	22.9767	111.511	-1.97343	-1.66518	0.0784608	0.0429785	1.92263e-07	1.36213e-06	0.828871	0.897236	4.24901e-05	0.000292858	LungL_0_Bl-04/LungL_0_control
LungL_0_Bl-04/LungL_0_control	LungL	0	Bl-04	path:mmu05163	Human cytomegalovirus infection	100.733	211.175	-0.906702	-1.36884	0.149925	0.352824	1.91298e-06	4.60735e-06	0.828871	0.897236	0.000211384	0.00049529	LungL_0_Bl-04/LungL_0_control
LungL_0_Bl-04/LungL_0_control	LungL	0	Bl-04	path:mmu04144	Endocytosis	0	133.376		-2.28052	0.0244878		8.2979e-05	2.8664e-05	0.828871		0.00203759	0.00205425	LungL_0_Bl-04/LungL_0_control
LungL_0_Bl-04/LungL_0_control	LungL	0	Bl-04	path:mmu04714	Thermogenesis	25.8565	132.208	-1.09425	-1.45855	0.106447	0.216892	3.86219e-05	5.50972e-05	0.828871	0.897236	0.00150182	0.00267058	LungL_0_Bl-04/LungL_0_control
LungL_0_Bl-04/LungL_0_control	LungL	0	Bl-04	path:mmu05012	Parkinson disease	30.7486	167.963	-0.196712	-0.539502	0.575712	0.855072	8.128e-06	6.21064e-05	0.861763	0.987183	0.000598762	0.00267058	LungL_0_Bl-04/LungL_0_control
LungL_0_Bl-04/LungL_0_control	LungL	0	Bl-04	path:mmu04370	VEGF signaling pathway	15.8446	45.4992	-1.76927	-1.98585	0.0404798	0.067966	0.000181224	9.40663e-05	0.828871	0.897236	0.00370818	0.00337071	LungL_0_Bl-04/LungL_0_control
LungL_0_Bl-04/LungL_0_control	LungL	0	Bl-04	path:mmu05020	Prion disease	79.3326	213.46	1.4755	1.06056	0.256372	0.0989505	4.44021e-05	0.000140965	0.828871	0.897236	0.00150182	0.00432965	LungL_0_Bl-04/LungL_0_control
LungL_0_Bl-04/LungL_0_control	LungL	0	Bl-04	path:mmu04062	Chemokine signaling pathway	88.3717	182.939	-0.24712	-0.28774	0.78061	0.81959	2.33067e-05	0.000216765	0.932395	0.985772	0.0012877	0.00582556	LungL_0_Bl-04/LungL_0_control
LungL_0_Bl-04/LungL_0_control	LungL	0	Bl-04	path:mmu04218	Cellular senescence	61.6273	138.759	-1.3014	-1.47453	0.104448	0.156922	0.00027765	0.000331998	0.828871	0.897236	0.00463964	0.00736944	LungL_0_Bl-04/LungL_0_control
LungL_0_Bl-04/LungL_0_control	LungL	0	Bl-04	path:mmu04141	Protein processing in endoplasmic reticulum	26.9263	114.226	-0.0422891	-0.739115	0.44028	0.958521	6.82116e-05	0.000342765	0.848058	0.987421	0.00188435	0.00736944	LungL_0_Bl-04/LungL_0_control
LungL_0_Bl-04/LungL_0_control	LungL	0	Bl-04	path:mmu05135	Yersinia infection	89.4563	159.713	-0.3997	-0.379382	0.709645	0.695652	4.75688e-05	0.00038133	0.887653	0.965662	0.00150182	0.00745327	LungL_0_Bl-04/LungL_0_control
LungL_0_Bl-04/LungL_0_control	LungL	0	Bl-04	path:mmu04380	Osteoclast differentiation	51.3677	96.1619	-0.241348	-1.41662	0.147926	0.82059	0.000314908	0.000511216	0.828871	0.985772	0.00463964	0.00915928	LungL_0_Bl-04/LungL_0_control
LungL_0_Bl-04/LungL_0_control	LungL	0	Bl-04	path:mmu04145	Phagosome	0	93.5207		-1.24928	0.207896		0.00026618	0.000597761	0.828871		0.00463964	0.00988605	LungL_0_Bl-04/LungL_0_control
LungL_0_Bl-04/LungL_0_control	LungL	0	Bl-04	path:mmu05171	Coronavirus disease - COVID-19	383.805	487.198	1.39539	1.27805	0.121439	0.0949525	0.000505221	0.000656414	0.828871	0.897236	0.00558269	0.0100806	LungL_0_Bl-04/LungL_0_control
LungL_0_Bl-04/LungL_0_control	LungL	0	Bl-04	path:mmu05132	Salmonella infection	63.3501	183.999	-1.47741	-1.30327	0.18041	0.116942	0.000491926	0.000916744	0.828871	0.897236	0.00558269	0.0130547	LungL_0_Bl-04/LungL_0_control
LungL_0_Bl-04/LungL_0_control	LungL	0	Bl-04	path:mmu05202	Transcriptional misregulation in cancer	1.58044	97.7562	0.226622	-1.30372	0.190405	0.864068	0.000497041	0.00097151	0.828871	0.987183	0.00558269	0.0130547	LungL_0_Bl-04/LungL_0_control
LungL_0_Bl-04/LungL_0_control	LungL	0	Bl-04	path:mmu05142	Chagas disease	20.2164	69.9929	-2.3639	-2.09581	0.031984	0.021989	0.00340308	0.00110211	0.828871	0.897236	0.0146189	0.0134951	LungL_0_Bl-04/LungL_0_control
LungL_0_Bl-04/LungL_0_control	LungL	0	Bl-04	path:mmu04022	cGMP-PKG signaling pathway	48.2182	140.669	-0.591959	-0.548811	0.606197	0.575212	0.00018457	0.00112983	0.868109	0.944168	0.00370818	0.0134951	LungL_0_Bl-04/LungL_0_control
LungL_0_Bl-04/LungL_0_control	LungL	0	Bl-04	path:mmu04611	Platelet activation	40.8239	99.183	-1.30806	-1.34722	0.153423	0.164918	0.000938504	0.00141768	0.828871	0.897236	0.00797729	0.0160421	LungL_0_Bl-04/LungL_0_control
LungL_0_Bl-04/LungL_0_control	LungL	0	Bl-04	path:mmu04613	Neutrophil extracellular trap formation	8.34295	59.5079	-1.36379	-2.13577	0.035982	0.157921	0.00505764	0.00174915	0.828871	0.897236	0.0189447	0.0184235	LungL_0_Bl-04/LungL_0_control
LungL_0_Bl-04/LungL_0_control	LungL	0	Bl-04	path:mmu04390	Hippo signaling pathway	68.7926	143.093	-0.235591	-0.513954	0.628686	0.827086	0.000311617	0.00186855	0.870986	0.985772	0.00463964	0.0184235	LungL_0_Bl-04/LungL_0_control
LungL_0_Bl-04/LungL_0_control	LungL	0	Bl-04	path:mmu04724	Glutamatergic synapse	7.04653	61.1461	-1.28937	-1.6284	0.0969515	0.183908	0.00207774	0.0019157	0.828871	0.897236	0.0117739	0.0184235	LungL_0_Bl-04/LungL_0_control
LungL_0_Bl-04/LungL_0_control	LungL	0	Bl-04	path:mmu04140	Autophagy - animal	53.932	128.907	-1.13908	-0.838883	0.388806	0.214393	0.000554155	0.00203452	0.837664	0.897236	0.00583182	0.0184235	LungL_0_Bl-04/LungL_0_control
LungL_0_Bl-04/LungL_0_control	LungL	0	Bl-04	path:mmu04919	Thyroid hormone signaling pathway	17.7113	87.2393	-0.710872	-0.69307	0.463768	0.446777	0.000470219	0.00205657	0.86043	0.925665	0.00558269	0.0184235	LungL_0_Bl-04/LungL_0_control
LungL_0_Bl-04/LungL_0_control	LungL	0	Bl-04	path:mmu05230	Central carbon metabolism in cancer	15.0122	57.6998	-1.35456	-1.19197	0.195902	0.134433	0.00145785	0.00261632	0.828871	0.897236	0.00933423	0.0225004	LungL_0_Bl-04/LungL_0_control
LungL_0_Bl-04/LungL_0_control	LungL	0	Bl-04	path:mmu05418	Fluid shear stress and atherosclerosis	43.0732	110.921	-0.322923	-0.8157	0.417791	0.746127	0.000723699	0.00275261	0.837683	0.968076	0.0063975	0.022762	LungL_0_Bl-04/LungL_0_control
LungL_0_Bl-04/LungL_0_control	LungL	0	Bl-04	path:mmu05170	Human immunodeficiency virus 1 infection	86.6779	186.78	-0.921406	-1.0002	0.296852	0.344828	0.00119149	0.00316455	0.828871	0.897236	0.00908	0.0245596	LungL_0_Bl-04/LungL_0_control
LungL_0_Bl-04/LungL_0_control	LungL	0	Bl-04	path:mmu04932	Non-alcoholic fatty liver disease	49.1478	133.206	-0.351691	-0.139965	0.883558	0.730135	0.000405143	0.00319846	0.959419	0.965662	0.00558269	0.0245596	LungL_0_Bl-04/LungL_0_control
LungL_0_Bl-04/LungL_0_control	LungL	0	Bl-04	path:mmu05017	Spinocerebellar ataxia	10.1997	84.6768	-0.857893	-1.14223	0.256872	0.376312	0.00148865	0.00339145	0.828871	0.897236	0.00933423	0.0251435	LungL_0_Bl-04/LungL_0_control
LungL_0_Bl-04/LungL_0_control	LungL	0	Bl-04	path:mmu04935	Growth hormone synthesis, secretion and action	80.8999	139.654	-0.458588	-0.418764	0.682159	0.656172	0.000698576	0.00412157	0.883376	0.960823	0.0063975	0.0288809	LungL_0_Bl-04/LungL_0_control
LungL_0_Bl-04/LungL_0_control	LungL	0	Bl-04	path:mmu05211	Renal cell carcinoma	11.8297	50.6845	-1.19203	-1.17821	0.214893	0.208896	0.00227218	0.00421119	0.828871	0.897236	0.0125538	0.0288809	LungL_0_Bl-04/LungL_0_control
LungL_0_Bl-04/LungL_0_control	LungL	0	Bl-04	path:mmu04740	Olfactory transduction	103.886	165.229	4.48979	4.99129	0.00049975	0.00049975	1	0.00429855	0.107446	0.102449	1	0.0288809	LungL_0_Bl-04/LungL_0_control
LungL_0_Bl-04/LungL_0_control	LungL	0	Bl-04	path:mmu05166	Human T-cell leukemia virus 1 infection	53.1562	151.557	-0.951672	-1.53699	0.114443	0.336832	0.0048592	0.00472383	0.828871	0.897236	0.0185152	0.02934	LungL_0_Bl-04/LungL_0_control
LungL_0_Bl-04/LungL_0_control	LungL	0	Bl-04	path:mmu04725	Cholinergic synapse	21.7516	83.3351	-1.17546	-0.933555	0.352324	0.222889	0.00159311	0.00476271	0.837664	0.897236	0.00951562	0.02934	LungL_0_Bl-04/LungL_0_control
LungL_0_Bl-04/LungL_0_control	LungL	0	Bl-04	path:mmu04213	Longevity regulating pathway - multiple species	28.8727	65.7596	-0.0395199	-0.202028	0.83958	0.971014	0.000714441	0.00504989	0.950228	0.989493	0.0063975	0.02934	LungL_0_Bl-04/LungL_0_control
LungL_0_Bl-04/LungL_0_control	LungL	0	Bl-04	path:mmu04924	Renin secretion	11.1452	52.2738	-1.21776	-1.29176	0.182909	0.207896	0.00332602	0.00511309	0.828871	0.897236	0.0146189	0.02934	LungL_0_Bl-04/LungL_0_control
LungL_0_Bl-04/LungL_0_control	LungL	0	Bl-04	path:mmu03250	Viral life cycle - HIV-1	0	30.2344		-1.86057	0.0594703		0.0104118	0.00519324	0.828871		0.0302765	0.02934	LungL_0_Bl-04/LungL_0_control
LungL_0_Bl-04/LungL_0_control	LungL	0	Bl-04	path:mmu05210	Colorectal cancer	26.8517	74.7653	-0.663436	-0.729117	0.462269	0.501249	0.00135096	0.00523245	0.86043	0.925665	0.00933004	0.02934	LungL_0_Bl-04/LungL_0_control
LungL_0_Bl-04/LungL_0_control	LungL	0	Bl-04	path:mmu05014	Amyotrophic lateral sclerosis	29.7879	193.643	-0.060808	-0.570864	0.564218	0.952024	0.0011559	0.00543602	0.861763	0.987421	0.00908	0.02934	LungL_0_Bl-04/LungL_0_control
LungL_0_Bl-04/LungL_0_control	LungL	0	Bl-04	path:mmu04666	Fc gamma R-mediated phagocytosis	20.6628	64.1106	-1.08557	-1.42557	0.138931	0.257871	0.00471643	0.0054586	0.828871	0.897236	0.0182865	0.02934	LungL_0_Bl-04/LungL_0_control
LungL_0_Bl-04/LungL_0_control	LungL	0	Bl-04	path:mmu05415	Diabetic cardiomyopathy	15.0717	104.628	-0.78163	-1.25182	0.188406	0.408796	0.00381227	0.00591747	0.828871	0.897236	0.0156021	0.0310306	LungL_0_Bl-04/LungL_0_control
LungL_0_Bl-04/LungL_0_control	LungL	0	Bl-04	path:mmu04146	Peroxisome	0	54.6077		-0.594106	0.550725		0.00135096	0.00610342	0.861763		0.00933004	0.0312323	LungL_0_Bl-04/LungL_0_control
LungL_0_Bl-04/LungL_0_control	LungL	0	Bl-04	path:mmu05212	Pancreatic cancer	24.6147	54.7765	-0.575592	-1.46109	0.131934	0.555222	0.00579001	0.00624647	0.828871	0.940666	0.0206386	0.0312323	LungL_0_Bl-04/LungL_0_control
LungL_0_Bl-04/LungL_0_control	LungL	0	Bl-04	path:mmu04933	AGE-RAGE signaling pathway in diabetic complications	18.8263	62.7168	-1.06481	-1.57891	0.10095	0.268366	0.0081883	0.006694	0.828871	0.897236	0.0253946	0.0317394	LungL_0_Bl-04/LungL_0_control
LungL_0_Bl-04/LungL_0_control	LungL	0	Bl-04	path:mmu04922	Glucagon signaling pathway	16.8765	72.3634	-1.00816	-1.03074	0.285357	0.296852	0.00289843	0.00669743	0.828871	0.897236	0.0142706	0.0317394	LungL_0_Bl-04/LungL_0_control
LungL_0_Bl-04/LungL_0_control	LungL	0	Bl-04	path:mmu04960	Aldosterone-regulated sodium reabsorption	17.7375	45.5441	1.25527	1.30495	0.157921	0.161919	0.005441	0.00692507	0.828871	0.897236	0.0197125	0.0317394	LungL_0_Bl-04/LungL_0_control
LungL_0_Bl-04/LungL_0_control	LungL	0	Bl-04	path:mmu04923	Regulation of lipolysis in adipocytes	25.0598	49.5296	-0.340076	-1.01173	0.296352	0.752124	0.00290579	0.00693839	0.828871	0.96972	0.0142706	0.0317394	LungL_0_Bl-04/LungL_0_control
LungL_0_Bl-04/LungL_0_control	LungL	0	Bl-04	path:mmu05100	Bacterial invasion of epithelial cells	50.3361	89.0155	0.473505	0.270544	0.7991	0.646677	0.00116643	0.0074363	0.94231	0.960823	0.00908	0.0333084	LungL_0_Bl-04/LungL_0_control
LungL_0_Bl-04/LungL_0_control	LungL	0	Bl-04	path:mmu04914	Progesterone-mediated oocyte maturation	9.97534	64.3942	-1.41116	-1.00943	0.282859	0.11994	0.00337825	0.00759981	0.828871	0.897236	0.0146189	0.0333249	LungL_0_Bl-04/LungL_0_control
LungL_0_Bl-04/LungL_0_control	LungL	0	Bl-04	path:mmu04152	AMPK signaling pathway	34.5004	107.907	0.162246	0.447442	0.642679	0.858571	0.00152051	0.00774998	0.870986	0.987183	0.00933423	0.0333249	LungL_0_Bl-04/LungL_0_control
LungL_0_Bl-04/LungL_0_control	LungL	0	Bl-04	path:mmu04921	Oxytocin signaling pathway	29.4577	122.582	-1.1363	-0.197493	0.83908	0.236882	0.00124203	0.0081981	0.950228	0.897236	0.00914959	0.0345606	LungL_0_Bl-04/LungL_0_control
LungL_0_Bl-04/LungL_0_control	LungL	0	Bl-04	path:mmu04072	Phospholipase D signaling pathway	28.706	87.0582	-1.35757	-1.63183	0.0854573	0.154423	0.0127675	0.00853284	0.828871	0.897236	0.0348347	0.0346906	LungL_0_Bl-04/LungL_0_control
LungL_0_Bl-04/LungL_0_control	LungL	0	Bl-04	path:mmu04122	Sulfur relay system	8.54466	19.8812	1.52994	1.90975	0.0484758	0.106947	0.0225645	0.00855164	0.828871	0.897236	0.0536209	0.0346906	LungL_0_Bl-04/LungL_0_control
LungL_0_Bl-04/LungL_0_control	LungL	0	Bl-04	path:mmu05165	Human papillomavirus infection	141.407	296.976	0.460394	0.262412	0.77911	0.637181	0.00144128	0.00874954	0.932395	0.960823	0.00933423	0.0348361	LungL_0_Bl-04/LungL_0_control
LungL_0_Bl-04/LungL_0_control	LungL	0	Bl-04	path:mmu04530	Tight junction	46.7409	123.042	-0.240663	-0.507065	0.606697	0.803098	0.0020242	0.009459	0.868109	0.985772	0.0117723	0.0369761	LungL_0_Bl-04/LungL_0_control
LungL_0_Bl-04/LungL_0_control	LungL	0	Bl-04	path:mmu05203	Viral carcinogenesis	1.68115	100.103	-0.151379	-0.792069	0.43928	0.871064	0.00316839	0.010546	0.848058	0.987183	0.0146189	0.040489	LungL_0_Bl-04/LungL_0_control
LungL_0_Bl-04/LungL_0_control	LungL	0	Bl-04	path:mmu04014	Ras signaling pathway	54.3364	154.948	-1.05105	-1.15994	0.243878	0.295852	0.00664185	0.0120278	0.828871	0.897236	0.0229351	0.0452147	LungL_0_Bl-04/LungL_0_control
LungL_0_Bl-04/LungL_0_control	LungL	0	Bl-04	path:mmu04261	Adrenergic signaling in cardiomyocytes	21.6938	98.4231	-1.02167	-0.768472	0.41979	0.310345	0.00392159	0.0121974	0.837683	0.897236	0.0157576	0.0452147	LungL_0_Bl-04/LungL_0_control
LungL_0_Bl-04/LungL_0_control	LungL	0	Bl-04	path:mmu04926	Relaxin signaling pathway	32.2649	82.8116	-1.30984	-1.38998	0.127936	0.144428	0.0135966	0.0127925	0.828871	0.897236	0.0362031	0.0464757	LungL_0_Bl-04/LungL_0_control
LungL_0_Bl-04/LungL_0_control	LungL	0	Bl-04	path:mmu05022	Pathways of neurodegeneration - multiple diseases	91.4988	285.359	0.0170399	-0.356679	0.725637	0.986507	0.00243573	0.01297	0.887653	0.991343	0.0131292	0.0464757	LungL_0_Bl-04/LungL_0_control
LungL_0_Bl-04/LungL_0_control	LungL	0	Bl-04	path:mmu05160	Hepatitis C	52.6725	123.669	-0.469867	-0.801436	0.41929	0.645677	0.00462636	0.0140541	0.837683	0.960823	0.0182576	0.049535	LungL_0_Bl-04/LungL_0_control
LungL_0_Bl-04/LungL_0_control	LungL	0	Bl-04	path:mmu05161	Hepatitis B	116.746	166.466	-1.07623	-1.21083	0.208396	0.288856	0.0098568	0.0147648	0.828871	0.897236	0.0294372	0.0509231	LungL_0_Bl-04/LungL_0_control
LungL_0_Bl-04/LungL_0_control	LungL	0	Bl-04	path:mmu04723	Retrograde endocannabinoid signaling	5.4805	67.991	-0.418654	-1.08126	0.272364	0.691654	0.00767816	0.0149943	0.828871	0.965662	0.0253265	0.0509231	LungL_0_Bl-04/LungL_0_control
LungL_0_Bl-04/LungL_0_control	LungL	0	Bl-04	path:mmu05010	Alzheimer disease	70.7807	242.234	-0.37035	-0.229611	0.815092	0.710645	0.00262787	0.0153065	0.94231	0.965662	0.0138276	0.0509231	LungL_0_Bl-04/LungL_0_control
LungL_0_Bl-04/LungL_0_control	LungL	0	Bl-04	path:mmu04068	FoxO signaling pathway	55.2322	118.517	0.625744	0.355445	0.722139	0.536732	0.00319121	0.0162994	0.887653	0.940427	0.0146189	0.0526019	LungL_0_Bl-04/LungL_0_control
LungL_0_Bl-04/LungL_0_control	LungL	0	Bl-04	path:mmu05016	Huntington disease	10.1794	151.176	-0.801608	-0.426259	0.661669	0.403798	0.00361858	0.0168431	0.878141	0.897236	0.0150888	0.0526019	LungL_0_Bl-04/LungL_0_control
LungL_0_Bl-04/LungL_0_control	LungL	0	Bl-04	path:mmu04071	Sphingolipid signaling pathway	56.6462	120.691	0.0791446	0.146903	0.889055	0.93953	0.00270025	0.0168815	0.960032	0.987421	0.013878	0.0526019	LungL_0_Bl-04/LungL_0_control
LungL_0_Bl-04/LungL_0_control	LungL	0	Bl-04	path:mmu04720	Long-term potentiation	28.3474	63.2919	-0.795864	-0.711747	0.481259	0.447776	0.00541617	0.018115	0.86043	0.925665	0.0197125	0.055639	LungL_0_Bl-04/LungL_0_control
LungL_0_Bl-04/LungL_0_control	LungL	0	Bl-04	path:mmu04211	Longevity regulating pathway	32.5421	78.3572	0.046578	-0.233164	0.817591	0.971514	0.00337825	0.0190353	0.94231	0.989493	0.0146189	0.0576421	LungL_0_Bl-04/LungL_0_control
LungL_0_Bl-04/LungL_0_control	LungL	0	Bl-04	path:mmu05417	Lipid and atherosclerosis	76.7605	159.663	-0.56372	-0.952618	0.346827	0.575712	0.00956263	0.0222503	0.837664	0.944168	0.0289499	0.0647422	LungL_0_Bl-04/LungL_0_control
LungL_0_Bl-04/LungL_0_control	LungL	0	Bl-04	path:mmu04659	Th17 cell differentiation	47.1222	87.3299	-0.217479	-0.825824	0.405797	0.836582	0.0081883	0.0222858	0.837683	0.987183	0.0253946	0.0647422	LungL_0_Bl-04/LungL_0_control
LungL_0_Bl-04/LungL_0_control	LungL	0	Bl-04	path:mmu04510	Focal adhesion	92.1748	176.806	0.347593	-0.0272753	0.98051	0.724138	0.00343974	0.0225702	0.985092	0.965662	0.0146189	0.0647422	LungL_0_Bl-04/LungL_0_control
LungL_0_Bl-04/LungL_0_control	LungL	0	Bl-04	path:mmu04540	Gap junction	24.4972	70.6863	-0.81428	-0.621716	0.516242	0.384808	0.00653802	0.0225845	0.861223	0.897236	0.022935	0.0647422	LungL_0_Bl-04/LungL_0_control
LungL_0_Bl-04/LungL_0_control	LungL	0	Bl-04	path:mmu05152	Tuberculosis	60.2322	136.485	-0.430726	-0.642588	0.531734	0.670665	0.00790975	0.0272174	0.861763	0.965662	0.0253946	0.0750223	LungL_0_Bl-04/LungL_0_control
LungL_0_Bl-04/LungL_0_control	LungL	0	Bl-04	path:mmu04929	GnRH secretion	0	33.4046		-1.13781	0.255372		0.0177991	0.0290616	0.828871		0.0453468	0.0790917	LungL_0_Bl-04/LungL_0_control
LungL_0_Bl-04/LungL_0_control	LungL	0	Bl-04	path:mmu05231	Choline metabolism in cancer	22.4042	61.0649	-0.464337	-1.11946	0.245377	0.653673	0.0200226	0.0310304	0.828871	0.960823	0.0496435	0.0833942	LungL_0_Bl-04/LungL_0_control
LungL_0_Bl-04/LungL_0_control	LungL	0	Bl-04	path:mmu04722	Neurotrophin signaling pathway	50.6987	106.254	-0.719354	-0.688837	0.50025	0.471264	0.0106391	0.0331886	0.86043	0.925665	0.0305356	0.0859704	LungL_0_Bl-04/LungL_0_control
LungL_0_Bl-04/LungL_0_control	LungL	0	Bl-04	path:mmu04670	Leukocyte transendothelial migration	31.9711	84.9236	-0.222897	-0.434161	0.666667	0.823088	0.00825231	0.0341245	0.879346	0.985772	0.0253946	0.0873426	LungL_0_Bl-04/LungL_0_control
LungL_0_Bl-04/LungL_0_control	LungL	0	Bl-04	path:mmu04658	Th1 and Th2 cell differentiation	179.943	212.53	-0.96677	-0.984922	0.285357	0.30035	0.0202168	0.0355098	0.828871	0.897236	0.0496435	0.0898188	LungL_0_Bl-04/LungL_0_control
LungL_0_Bl-04/LungL_0_control	LungL	0	Bl-04	path:mmu04664	Fc epsilon RI signaling pathway	39.7911	63.3077	0.152136	-0.390557	0.708146	0.878561	0.00827336	0.0359716	0.887653	0.987183	0.0253946	0.0899291	LungL_0_Bl-04/LungL_0_control
LungL_0_Bl-04/LungL_0_control	LungL	0	Bl-04	path:mmu01522	Endocrine resistance	52.5696	95.4179	-0.55221	-0.56336	0.588206	0.598701	0.0107823	0.0384371	0.861763	0.960823	0.0305498	0.0949882	LungL_0_Bl-04/LungL_0_control
LungL_0_Bl-04/LungL_0_control	LungL	0	Bl-04	path:mmu04625	C-type lectin receptor signaling pathway	39.5485	89.3119	-0.676013	-0.774732	0.430785	0.49925	0.0149713	0.0389787	0.848058	0.925665	0.0393888	0.0952321	LungL_0_Bl-04/LungL_0_control
LungL_0_Bl-04/LungL_0_control	LungL	0	Bl-04	path:mmu05145	Toxoplasmosis	49.2827	94.2143	1.07107	0.0770266	0.933033	0.263868	0.00718231	0.0402445	0.962904	0.897236	0.0244199	0.0970278	LungL_0_Bl-04/LungL_0_control
LungL_0_Bl-04/LungL_0_control	LungL	0	Bl-04	path:mmu05220	Chronic myeloid leukemia	29.6875	63.4236	-0.0591696	-0.577536	0.567216	0.944528	0.0119455	0.0406163	0.861763	0.987421	0.0329995	0.0970278	LungL_0_Bl-04/LungL_0_control
LungL_0_Bl-04/LungL_0_control	LungL	0	Bl-04	path:mmu04970	Salivary secretion	6.64098	48.9164	-0.815361	-0.869133	0.377311	0.415792	0.0188238	0.0422404	0.837664	0.897236	0.0472733	0.09791	LungL_0_Bl-04/LungL_0_control
LungL_0_Bl-04/LungL_0_control	LungL	0	Bl-04	path:mmu04150	mTOR signaling pathway	114.884	183.137	0.0848603	0.0745515	0.948026	0.936032	0.00759256	0.0427123	0.965998	0.987421	0.0253265	0.09791	LungL_0_Bl-04/LungL_0_control
LungL_0_Bl-04/LungL_0_control	LungL	0	Bl-04	path:mmu05169	Epstein-Barr virus infection	79.9408	169.218	-0.259244	-0.601401	0.554223	0.8001	0.0130222	0.0428072	0.861763	0.985772	0.0350963	0.09791	LungL_0_Bl-04/LungL_0_control
LungL_0_Bl-04/LungL_0_control	LungL	0	Bl-04	path:mmu05140	Leishmaniasis	34.3317	67.5186	0.891514	0.352889	0.716142	0.357321	0.0113413	0.0472146	0.887653	0.897236	0.031727	0.104651	LungL_0_Bl-04/LungL_0_control
LungL_0_Bl-04/LungL_0_control	LungL	0	Bl-04	path:mmu04928	Parathyroid hormone synthesis, secretion and action	50.1363	105.247	0.0280407	0.192052	0.848576	0.975012	0.0101243	0.0494598	0.950228	0.989493	0.0298329	0.108509	LungL_0_Bl-04/LungL_0_control
LungL_0_Bl-04/LungL_0_control	LungL	0	Bl-04	path:mmu04915	Estrogen signaling pathway	34.0768	100.241	-0.584795	-0.401392	0.686157	0.545227	0.0178514	0.0661724	0.883376	0.940666	0.0453468	0.134218	LungL_0_Bl-04/LungL_0_control
LungL_0_Bl-04/LungL_0_control	LungL	0	Bl-04	path:mmu04910	Insulin signaling pathway	68.4474	124.75	0.103772	-0.164274	0.88056	0.922039	0.0153711	0.0717696	0.959419	0.987421	0.0399648	0.140277	LungL_0_Bl-04/LungL_0_control
LungL_0_Bl-04/LungL_0_control	LungL	0	Bl-04	path:mmu05200	Pathways in cancer							0.000584293				0.00586949		LungL_0_Bl-04/LungL_0_control
LungR_-14_Bl-04/LungR_-14_control	LungR	-14	Bl-04	path:mmu04740	Olfactory transduction	66.6654	99.998	0.96069	0.95425	0.712144	0.750125	0.00196975	0.0106178	0.712144	0.750125	0.00196975	0.0106178	LungR_-14_Bl-04/LungR_-14_control
LungR_-18_Bl-04/LungR_-18_control	LungR	-18	Bl-04	path:mmu04740	Olfactory transduction	30.942	46.413	1.71085	1.76568	0.00549725	0.00849575	0.0142661	0.000819801	0.00549725	0.00849575	0.0142661	0.000819801	LungR_-18_Bl-04/LungR_-18_control
LungR_-21_Bl-04/LungR_-21_control	LungR	-21	Bl-04	path:mmu04740	Olfactory transduction	37.962	56.9429	0.221223	0.209677	0.575712	0.575712	0.0283296	0.0834404	0.575712	0.575712	0.0283296	0.0834404	LungR_-21_Bl-04/LungR_-21_control
LungR_-7_Bl-04/LungR_-7_control	LungR	-7	Bl-04	path:mmu05150	Staphylococcus aureus infection	0	22.0232	-0.477069	-0.39432	0.587706	0.182409	0.00870291	0.0320983	0.587706	0.243378	0.0174058	0.0623524	LungR_-7_Bl-04/LungR_-7_control
LungR_-7_Bl-04/LungR_-7_control	LungR	-7	Bl-04	path:mmu04621	NOD-like receptor signaling pathway	0	22.0232	-0.839876	-0.761294	0.51924	0.243378	0.0219324	0.0623524	0.587706	0.243378	0.0219324	0.0623524	LungR_-7_Bl-04/LungR_-7_control
LungR_0_Bl-04/LungR_0_control	LungR	0	Bl-04	path:mmu04540	Gap junction	18.151	90.1072	-1.74903	-1.5639	0.0824588	0.0524738	0.000111741	0.000116048	0.682001	0.80277	0.0231856	0.0249504	LungR_0_Bl-04/LungR_0_control
LungR_0_Bl-04/LungR_0_control	LungR	0	Bl-04	path:mmu04015	Rap1 signaling pathway	72.3115	182.829	-2.3713	-2.62019	0.0109945	0.0194903	0.00250735	0.000316991	0.682001	0.80277	0.0439259	0.0340765	LungR_0_Bl-04/LungR_0_control
LungR_0_Bl-04/LungR_0_control	LungR	0	Bl-04	path:mmu04935	Growth hormone synthesis, secretion and action	100.205	171.549	-1.21534	-1.31449	0.182409	0.227886	0.000391364	0.000752959	0.682001	0.80277	0.0288305	0.0539621	LungR_0_Bl-04/LungR_0_control
LungR_0_Bl-04/LungR_0_control	LungR	0	Bl-04	path:mmu04914	Progesterone-mediated oocyte maturation	28.5362	113.001	-0.571094	-0.318557	0.754123	0.554223	0.000209825	0.00154301	0.857865	0.901712	0.0231856	0.0819488	LungR_0_Bl-04/LungR_0_control
LungR_0_Bl-04/LungR_0_control	LungR	0	Bl-04	path:mmu04925	Aldosterone synthesis and secretion	43.7653	110.373	0.0350565	-0.525946	0.609695	0.977011	0.00055374	0.00303636	0.803258	0.994503	0.0305942	0.0819488	LungR_0_Bl-04/LungR_0_control
LungR_0_Bl-04/LungR_0_control	LungR	0	Bl-04	path:mmu04114	Oocyte meiosis	39.3624	132.415	-1.31853	-0.911813	0.333333	0.158421	0.00101421	0.00304001	0.683397	0.80277	0.0346778	0.0819488	LungR_0_Bl-04/LungR_0_control
LungR_0_Bl-04/LungR_0_control	LungR	0	Bl-04	path:mmu04912	GnRH signaling pathway	48.0246	115.005	-0.857268	-0.904467	0.334333	0.36082	0.0012553	0.00368319	0.683397	0.850207	0.0346778	0.0819488	LungR_0_Bl-04/LungR_0_control
LungR_0_Bl-04/LungR_0_control	LungR	0	Bl-04	path:mmu04922	Glucagon signaling pathway	28.9965	104.27	-0.756644	-0.825771	0.387806	0.434283	0.00123242	0.00413228	0.718779	0.881465	0.0346778	0.0819488	LungR_0_Bl-04/LungR_0_control
LungR_0_Bl-04/LungR_0_control	LungR	0	Bl-04	path:mmu04971	Gastric acid secretion	13.7469	69.2972	-0.712872	-0.89498	0.322339	0.43978	0.00153667	0.00426491	0.683397	0.883621	0.0377337	0.0819488	LungR_0_Bl-04/LungR_0_control
LungR_0_Bl-04/LungR_0_control	LungR	0	Bl-04	path:mmu04927	Cortisol synthesis and secretion	19.8464	63.2106	0.115185	-0.992492	0.291354	0.905547	0.00190162	0.00470843	0.682001	0.974848	0.0420259	0.0819488	LungR_0_Bl-04/LungR_0_control
LungR_0_Bl-04/LungR_0_control	LungR	0	Bl-04	path:mmu04924	Renin secretion	29.5851	103.228	-0.196871	0.515144	0.606697	0.850575	0.00106243	0.00538021	0.803258	0.965552	0.0346778	0.0819488	LungR_0_Bl-04/LungR_0_control
LungR_0_Bl-04/LungR_0_control	LungR	0	Bl-04	path:mmu04923	Regulation of lipolysis in adipocytes	27.2512	74.9901	-0.956032	-0.865492	0.352324	0.309845	0.00210978	0.00609851	0.683397	0.809833	0.0423873	0.0819488	LungR_0_Bl-04/LungR_0_control
LungR_0_Bl-04/LungR_0_control	LungR	0	Bl-04	path:mmu04725	Cholinergic synapse	56.2401	124.859	-0.373581	-0.614484	0.524238	0.716142	0.00278263	0.0109847	0.784428	0.928479	0.0439259	0.102932	LungR_0_Bl-04/LungR_0_control
LungR_0_Bl-04/LungR_0_control	LungR	0	Bl-04	path:mmu04916	Melanogenesis	174.437	237.079	0.593733	0.43538	0.661169	0.558721	0.00271049	0.0131259	0.831295	0.901872	0.0439259	0.104521	LungR_0_Bl-04/LungR_0_control
LungR_0_Bl-04/LungR_0_control	LungR	0	Bl-04	path:mmu04662	B cell receptor signaling pathway	34.7164	96.9563	-0.346822	-0.404204	0.687156	0.725137	0.00316441	0.0155059	0.846793	0.928479	0.0466223	0.11472	LungR_0_Bl-04/LungR_0_control
LungR_5_Bl-04/LungR_5_control	LungR	5	Bl-04	path:mmu04740	Olfactory transduction	2031.92	3063.84	16.335	17.5694	0.00049975	0.00049975	6.52091e-57	1.12029e-08	0.0268616	0.0256122	1.44112e-54	2.40861e-06	LungR_5_Bl-04/LungR_5_control
LungR_5_Bl-04/LungR_5_control	LungR	5	Bl-04	path:mmu04976	Bile secretion	30.6529	170.471	1.16125	1.20869	0.21989	0.228886	1.22204e-06	4.33426e-06	0.487385	0.530457	0.000110342	0.000465933	LungR_5_Bl-04/LungR_5_control
LungR_5_Bl-04/LungR_5_control	LungR	5	Bl-04	path:mmu04080	Neuroactive ligand-receptor interaction	73.1452	362.541	-0.0689682	0.71983	0.461769	0.951524	1.49786e-06	1.05024e-05	0.661869	0.988786	0.000110342	0.00075267	LungR_5_Bl-04/LungR_5_control
LungR_5_Bl-04/LungR_5_control	LungR	5	Bl-04	path:mmu04217	Necroptosis	335.02	427.735	4.47065	4.3247	0.00049975	0.00049975	0.784265	0.00346645	0.0268616	0.0256122	1	0.154001	LungR_5_Bl-04/LungR_5_control
LungR_5_Bl-04/LungR_5_control	LungR	5	Bl-04	path:mmu05161	Hepatitis B	1395.35	1471.22	5.51855	5.44364	0.00049975	0.00049975	0.996901	0.00428678	0.0268616	0.0256122	1	0.154001	LungR_5_Bl-04/LungR_5_control
LungR_5_Bl-04/LungR_5_control	LungR	5	Bl-04	path:mmu05169	Epstein-Barr virus infection	324.847	425	5.11547	4.91454	0.00049975	0.00049975	0.999773	0.00429769	0.0268616	0.0256122	1	0.154001	LungR_5_Bl-04/LungR_5_control
LungR_7_Bl-04/LungR_7_control	LungR	7	Bl-04	path:mmu04740	Olfactory transduction	1269.66	1912.31	10.894	11.1826	0.00049975	0.00049975	1.63642e-20	1.12029e-08	0.106947	0.101949	3.60012e-18	2.39741e-06	LungR_7_Bl-04/LungR_7_control
Mediastinal_0_Bl-04/Mediastinal_0_control	Mediastinal	0	Bl-04	path:mmu04740	Olfactory transduction	3639.46	5481.25	18.4893	20.4675	0.00049975	0.00049975	4.18884e-08	1.12029e-08	0.0215892	0.0772114	9.29922e-06	2.41982e-06	Mediastinal_0_Bl-04/Mediastinal_0_control
Mediastinal_0_Bl-04/Mediastinal_0_control	Mediastinal	0	Bl-04	path:mmu03320	PPAR signaling pathway	11.5931	204.335	0.693129	2.16592	0.0304848	0.49925	2.58627e-07	5.58055e-07	0.21949	0.73129	2.87076e-05	6.027e-05	Mediastinal_0_Bl-04/Mediastinal_0_control
Mediastinal_0_Bl-04/Mediastinal_0_control	Mediastinal	0	Bl-04	path:mmu05415	Diabetic cardiomyopathy	34.4576	305.667	-1.30171	-1.64219	0.0954523	0.171914	1.15791e-05	1.62643e-05	0.293431	0.501373	0.000856856	0.00117103	Mediastinal_0_Bl-04/Mediastinal_0_control
Mediastinal_0_Bl-04/Mediastinal_0_control	Mediastinal	0	Bl-04	path:mmu04714	Thermogenesis	38.7074	314.22	-1.60854	-1.66292	0.0644678	0.0724638	0.000349308	0.000263499	0.268847	0.457943	0.0193866	0.014229	Mediastinal_0_Bl-04/Mediastinal_0_control
Mediastinal_0_Bl-04/Mediastinal_0_control	Mediastinal	0	Bl-04	path:mmu05410	Hypertrophic cardiomyopathy	0	165.197		1.6665	0.093953		0.000760136	0.000753234	0.293431		0.0257793	0.0225799	Mediastinal_0_Bl-04/Mediastinal_0_control
Mediastinal_0_Bl-04/Mediastinal_0_control	Mediastinal	0	Bl-04	path:mmu04060	Cytokine-cytokine receptor interaction	196.726	539.518	3.10663	2.62111	0.009995	0.00149925	0.00717132	0.000755719	0.143928	0.0772114	0.114319	0.0225799	Mediastinal_0_Bl-04/Mediastinal_0_control
Mediastinal_0_Bl-04/Mediastinal_0_control	Mediastinal	0	Bl-04	path:mmu04260	Cardiac muscle contraction	0	148.557		2.04539	0.0434783		0.00207531	0.000930564	0.24018		0.0575899	0.0225799	Mediastinal_0_Bl-04/Mediastinal_0_control
Mediastinal_0_Bl-04/Mediastinal_0_control	Mediastinal	0	Bl-04	path:mmu04080	Neuroactive ligand-receptor interaction	130.572	600.78	2.57531	5.13856	0.00049975	0.011994	0.185725	0.000954604	0.0215892	0.347451	0.72335	0.0225799	Mediastinal_0_Bl-04/Mediastinal_0_control
Mediastinal_0_Bl-04/Mediastinal_0_control	Mediastinal	0	Bl-04	path:mmu04932	Non-alcoholic fatty liver disease	72.3197	280.498	-1.74828	-1.26078	0.206897	0.0749625	0.000484025	0.00102235	0.40261	0.457943	0.0214907	0.0225799	Mediastinal_0_Bl-04/Mediastinal_0_control
Mediastinal_0_Bl-04/Mediastinal_0_control	Mediastinal	0	Bl-04	path:mmu04650	Natural killer cell mediated cytotoxicity	395.071	531.856	3.43088	3.32152	0.00249875	0.00149925	0.0410788	0.00104537	0.0809595	0.0772114	0.420032	0.0225799	Mediastinal_0_Bl-04/Mediastinal_0_control
Mediastinal_0_Bl-04/Mediastinal_0_control	Mediastinal	0	Bl-04	path:mmu05206	MicroRNAs in cancer	0	142.147		-3.48804	0.00049975		0.518832	0.00240036	0.0215892		0.999443	0.0458715	Mediastinal_0_Bl-04/Mediastinal_0_control
Mediastinal_0_Bl-04/Mediastinal_0_control	Mediastinal	0	Bl-04	path:mmu05203	Viral carcinogenesis	0	152.415	-1.13373	-4.64019	0.00049975	0.147926	0.569105	0.00260665	0.0215892	0.499554	0.999443	0.0458715	Mediastinal_0_Bl-04/Mediastinal_0_control
Mediastinal_0_Bl-04/Mediastinal_0_control	Mediastinal	0	Bl-04	path:mmu04723	Retrograde endocannabinoid signaling	4.78662	193.517	-1.74051	-1.55619	0.121939	0.07996	0.00248783	0.00276079	0.313558	0.457943	0.0613665	0.0458715	Mediastinal_0_Bl-04/Mediastinal_0_control
Mediastinal_0_Bl-04/Mediastinal_0_control	Mediastinal	0	Bl-04	path:mmu05414	Dilated cardiomyopathy	5.91273	168.603	-0.60176	0.771286	0.451274	0.554223	0.000812862	0.00326863	0.63576	0.756092	0.0257793	0.0504303	Mediastinal_0_Bl-04/Mediastinal_0_control
Mediastinal_0_Bl-04/Mediastinal_0_control	Mediastinal	0	Bl-04	path:mmu04144	Endocytosis	0	169.044		-4.91922	0.00049975		0.993617	0.00427429	0.0215892		0.999443	0.0615498	Mediastinal_0_Bl-04/Mediastinal_0_control
Mediastinal_3_Bl-04/Mediastinal_3_control	Mediastinal	3	Bl-04	path:mmu04062	Chemokine signaling pathway	94.4014	122.783	3.59062	3.72197	0.00049975	0.0009995	0.000237999	2.01539e-06	0.0949525	0.181909	0.0020739	0.000154215	Mediastinal_3_Bl-04/Mediastinal_3_control
Mediastinal_3_Bl-04/Mediastinal_3_control	Mediastinal	3	Bl-04	path:mmu05144	Malaria	2.52439	25.2864	0.631986	1.89048	0.0574713	0.771114	2.47193e-06	2.382e-06	0.839175	0.934033	6.88608e-05	0.000154215	Mediastinal_3_Bl-04/Mediastinal_3_control
Mediastinal_3_Bl-04/Mediastinal_3_control	Mediastinal	3	Bl-04	path:mmu04662	B cell receptor signaling pathway	6.95039	25.4954	-0.985922	-1.36574	0.145427	0.331334	4.72872e-07	2.43497e-06	0.839175	0.60912	2.30525e-05	0.000154215	Mediastinal_3_Bl-04/Mediastinal_3_control
Mediastinal_3_Bl-04/Mediastinal_3_control	Mediastinal	3	Bl-04	path:mmu05165	Human papillomavirus infection	42.7392	89.5242	-1.12964	-1.12324	0.248876	0.251374	7.05868e-07	4.03336e-06	0.898775	0.531978	2.75289e-05	0.000175758	Mediastinal_3_Bl-04/Mediastinal_3_control
Mediastinal_3_Bl-04/Mediastinal_3_control	Mediastinal	3	Bl-04	path:mmu05171	Coronavirus disease - COVID-19	30.337	99.5937	-1.02356	-1.00812	0.329835	0.303348	2.83229e-17	5.25252e-06	0.906465	0.581152	5.52297e-15	0.000175758	Mediastinal_3_Bl-04/Mediastinal_3_control
Mediastinal_3_Bl-04/Mediastinal_3_control	Mediastinal	3	Bl-04	path:mmu04621	NOD-like receptor signaling pathway	47.4224	94.0924	0.601879	0.941283	0.349825	0.566717	3.67975e-09	5.55027e-06	0.906465	0.84543	2.39183e-07	0.000175758	Mediastinal_3_Bl-04/Mediastinal_3_control
Mediastinal_3_Bl-04/Mediastinal_3_control	Mediastinal	3	Bl-04	path:mmu05169	Epstein-Barr virus infection	54.6525	102.179	-0.369913	-0.500491	0.631184	0.729635	3.65484e-11	9.64176e-06	0.965477	0.922178	3.56347e-09	0.000261705	Mediastinal_3_Bl-04/Mediastinal_3_control
Mediastinal_3_Bl-04/Mediastinal_3_control	Mediastinal	3	Bl-04	path:mmu05323	Rheumatoid arthritis	4.38826	28.2857	1.52074	1.83001	0.0624688	0.0984508	1.25501e-05	1.1806e-05	0.839175	0.524906	0.000271918	0.000280392	Mediastinal_3_Bl-04/Mediastinal_3_control
Mediastinal_3_Bl-04/Mediastinal_3_control	Mediastinal	3	Bl-04	path:mmu05164	Influenza A	19.7068	53.3114	-0.496033	-0.403898	0.702149	0.634183	1.28365e-06	1.3447e-05	0.987753	0.879916	4.17185e-05	0.000283882	Mediastinal_3_Bl-04/Mediastinal_3_control
Mediastinal_3_Bl-04/Mediastinal_3_control	Mediastinal	3	Bl-04	path:mmu04145	Phagosome	0	33.165		2.01498	0.0409795		3.27831e-05	1.95071e-05	0.839175		0.000633045	0.000370635	Mediastinal_3_Bl-04/Mediastinal_3_control
Mediastinal_3_Bl-04/Mediastinal_3_control	Mediastinal	3	Bl-04	path:mmu04623	Cytosolic DNA-sensing pathway	12.8046	29.9101	2.24914	2.10366	0.0364818	0.033983	6.76053e-05	3.43139e-05	0.839175	0.524906	0.000896698	0.000592695	Mediastinal_3_Bl-04/Mediastinal_3_control
Mediastinal_3_Bl-04/Mediastinal_3_control	Mediastinal	3	Bl-04	path:mmu04064	NF-kappa B signaling pathway	25.2659	46.3852	1.12255	0.743988	0.457271	0.256872	8.4387e-06	5.1959e-05	0.934179	0.534358	0.000205693	0.000822684	Mediastinal_3_Bl-04/Mediastinal_3_control
Mediastinal_3_Bl-04/Mediastinal_3_control	Mediastinal	3	Bl-04	path:mmu04060	Cytokine-cytokine receptor interaction	25.503	57.1289	3.10693	3.53604	0.00149925	0.001999	0.00660695	0.000124041	0.142429	0.181909	0.0204501	0.00170342	Mediastinal_3_Bl-04/Mediastinal_3_control
Mediastinal_3_Bl-04/Mediastinal_3_control	Mediastinal	3	Bl-04	path:mmu04061	Viral protein interaction with cytokine and cytokine receptor	16.1888	34.2475	2.93193	3.26972	0.00349825	0.00349825	0.00286815	0.000125515	0.221556	0.212227	0.0103508	0.00170342	Mediastinal_3_Bl-04/Mediastinal_3_control
Mediastinal_3_Bl-04/Mediastinal_3_control	Mediastinal	3	Bl-04	path:mmu04380	Osteoclast differentiation	28.5874	47.3463	0.262677	-0.188978	0.846077	0.795102	3.57102e-05	0.000344653	0.990219	0.934033	0.000633045	0.00436561	Mediastinal_3_Bl-04/Mediastinal_3_control
Mediastinal_3_Bl-04/Mediastinal_3_control	Mediastinal	3	Bl-04	path:mmu03250	Viral life cycle - HIV-1	0	11.2411		-1.84895	0.0684658		0.00052634	0.000404723	0.839175		0.00353918	0.00480608	Mediastinal_3_Bl-04/Mediastinal_3_control
Mediastinal_3_Bl-04/Mediastinal_3_control	Mediastinal	3	Bl-04	path:mmu05332	Graft-versus-host disease	1.86387	17.6777	0.71018	0.0783514	0.94003	0.258371	4.30202e-05	0.000449521	0.990219	0.534358	0.000645303	0.00493279	Mediastinal_3_Bl-04/Mediastinal_3_control
Mediastinal_3_Bl-04/Mediastinal_3_control	Mediastinal	3	Bl-04	path:mmu05330	Allograft rejection	1.86387	17.9042	0.446774	0.0252479	0.981009	0.91904	4.30202e-05	0.000467317	0.993003	0.972473	0.000645303	0.00493279	Mediastinal_3_Bl-04/Mediastinal_3_control
Mediastinal_3_Bl-04/Mediastinal_3_control	Mediastinal	3	Bl-04	path:mmu05167	Kaposi sarcoma-associated herpesvirus infection	38.1532	65.7741	-0.467672	-0.601026	0.556222	0.652174	8.2352e-05	0.000503458	0.961394	0.885788	0.00100366	0.00503458	Mediastinal_3_Bl-04/Mediastinal_3_control
Mediastinal_3_Bl-04/Mediastinal_3_control	Mediastinal	3	Bl-04	path:mmu05416	Viral myocarditis	7.30575	26.0671	0.456855	0.387617	0.709145	0.688156	6.89768e-05	0.000534413	0.987753	0.907568	0.000896698	0.00507692	Mediastinal_3_Bl-04/Mediastinal_3_control
Mediastinal_3_Bl-04/Mediastinal_3_control	Mediastinal	3	Bl-04	path:mmu04714	Thermogenesis	5.54413	33.7916	-1.07128	-1.04128	0.27986	0.28036	0.000259449	0.000764607	0.901244	0.56695	0.0020739	0.00691787	Mediastinal_3_Bl-04/Mediastinal_3_control
Mediastinal_3_Bl-04/Mediastinal_3_control	Mediastinal	3	Bl-04	path:mmu04612	Antigen processing and presentation	14.004	29.9528	1.77213	1.37148	0.168916	0.073963	0.000521313	0.0009103	0.844578	0.524906	0.00353918	0.00786168	Mediastinal_3_Bl-04/Mediastinal_3_control
Mediastinal_3_Bl-04/Mediastinal_3_control	Mediastinal	3	Bl-04	path:mmu04932	Non-alcoholic fatty liver disease	0	22.6681	-1.91038	-1.66738	0.0954523	0.0414793	0.000970274	0.000952735	0.839175	0.524906	0.00556481	0.00787042	Mediastinal_3_Bl-04/Mediastinal_3_control
Mediastinal_3_Bl-04/Mediastinal_3_control	Mediastinal	3	Bl-04	path:mmu05170	Human immunodeficiency virus 1 infection	57.9708	86.2609	0.458883	0.35626	0.727636	0.650675	0.000135877	0.00101061	0.987753	0.885788	0.00139768	0.00800066	Mediastinal_3_Bl-04/Mediastinal_3_control
Mediastinal_3_Bl-04/Mediastinal_3_control	Mediastinal	3	Bl-04	path:mmu04668	TNF signaling pathway	5.87832	29.6406	-0.330195	0.128769	0.897551	0.750125	0.000123713	0.00112212	0.990219	0.934033	0.00139768	0.00843261	Mediastinal_3_Bl-04/Mediastinal_3_control
Mediastinal_3_Bl-04/Mediastinal_3_control	Mediastinal	3	Bl-04	path:mmu05166	Human T-cell leukemia virus 1 infection	20.3845	47.4023	-0.508764	-0.799182	0.430785	0.62019	0.000265885	0.00115394	0.919653	0.872464	0.0020739	0.00843261	Mediastinal_3_Bl-04/Mediastinal_3_control
Mediastinal_3_Bl-04/Mediastinal_3_control	Mediastinal	3	Bl-04	path:mmu04218	Cellular senescence	64.8655	84.8695	0.861635	0.630931	0.528736	0.396302	0.000226656	0.00120193	0.961394	0.700262	0.0020739	0.00845802	Mediastinal_3_Bl-04/Mediastinal_3_control
Mediastinal_3_Bl-04/Mediastinal_3_control	Mediastinal	3	Bl-04	path:mmu04068	FoxO signaling pathway	3.05883	20.1447	-1.52178	-1.62032	0.083958	0.108946	0.0017037	0.00140928	0.839175	0.524906	0.00758962	0.00956295	Mediastinal_3_Bl-04/Mediastinal_3_control
Mediastinal_3_Bl-04/Mediastinal_3_control	Mediastinal	3	Bl-04	path:mmu04933	AGE-RAGE signaling pathway in diabetic complications	2.55613	19.2044	-1.77229	-1.60154	0.09995	0.0749625	0.00166727	0.00161639	0.839175	0.524906	0.00758962	0.0105901	Mediastinal_3_Bl-04/Mediastinal_3_control
Mediastinal_3_Bl-04/Mediastinal_3_control	Mediastinal	3	Bl-04	path:mmu05202	Transcriptional misregulation in cancer	0	20.9917	-0.328121	-1.38253	0.16042	0.105447	0.00112398	0.00173473	0.839175	0.524906	0.00561992	0.0109866	Mediastinal_3_Bl-04/Mediastinal_3_control
Mediastinal_3_Bl-04/Mediastinal_3_control	Mediastinal	3	Bl-04	path:mmu05020	Prion disease	10.2953	40.7748	-0.583356	-0.585941	0.566717	0.566217	0.000349866	0.00188874	0.961394	0.84543	0.00262399	0.0112678	Mediastinal_3_Bl-04/Mediastinal_3_control
Mediastinal_3_Bl-04/Mediastinal_3_control	Mediastinal	3	Bl-04	path:mmu05320	Autoimmune thyroid disease	1.86387	17.9042	0.60545	0.084751	0.91954	0.94053	0.000216772	0.00189774	0.990219	0.972593	0.0020739	0.0112678	Mediastinal_3_Bl-04/Mediastinal_3_control
Mediastinal_3_Bl-04/Mediastinal_3_control	Mediastinal	3	Bl-04	path:mmu04620	Toll-like receptor signaling pathway	21.2986	38.7651	0.0418144	-0.0768693	0.94053	0.969515	0.000245195	0.00216195	0.990219	0.98433	0.0020739	0.0124476	Mediastinal_3_Bl-04/Mediastinal_3_control
Mediastinal_3_Bl-04/Mediastinal_3_control	Mediastinal	3	Bl-04	path:mmu04210	Apoptosis	36.5856	55.6606	0.654839	0.492362	0.634183	0.516242	0.000501193	0.00287777	0.965477	0.817009	0.00353918	0.0160817	Mediastinal_3_Bl-04/Mediastinal_3_control
Mediastinal_3_Bl-04/Mediastinal_3_control	Mediastinal	3	Bl-04	path:mmu05135	Yersinia infection	20.0191	38.443	-1.44578	-1.34728	0.163418	0.141929	0.0020624	0.00303174	0.839175	0.524906	0.00854572	0.016458	Mediastinal_3_Bl-04/Mediastinal_3_control
Mediastinal_3_Bl-04/Mediastinal_3_control	Mediastinal	3	Bl-04	path:mmu05163	Human cytomegalovirus infection	28.1161	57.7997	-1.04286	-0.87062	0.373813	0.297351	0.0010587	0.00349638	0.906465	0.581152	0.00561992	0.0184531	Mediastinal_3_Bl-04/Mediastinal_3_control
Mediastinal_3_Bl-04/Mediastinal_3_control	Mediastinal	3	Bl-04	path:mmu05415	Diabetic cardiomyopathy	0	24.5633	-1.14908	-0.954043	0.315842	0.130935	0.00143425	0.00394089	0.906465	0.524906	0.00699195	0.0194913	Mediastinal_3_Bl-04/Mediastinal_3_control
Mediastinal_3_Bl-04/Mediastinal_3_control	Mediastinal	3	Bl-04	path:mmu05417	Lipid and atherosclerosis	21.6723	48.8682	-0.950752	-0.778632	0.428286	0.327836	0.00107176	0.00398724	0.919653	0.608838	0.00561992	0.0194913	Mediastinal_3_Bl-04/Mediastinal_3_control
Mediastinal_3_Bl-04/Mediastinal_3_control	Mediastinal	3	Bl-04	path:mmu04066	HIF-1 signaling pathway	5.21761	21.6446	-1.46717	-1.38155	0.157921	0.138931	0.00300005	0.00410038	0.839175	0.524906	0.0103508	0.0194913	Mediastinal_3_Bl-04/Mediastinal_3_control
Mediastinal_3_Bl-04/Mediastinal_3_control	Mediastinal	3	Bl-04	path:mmu04940	Type I diabetes mellitus	1.86387	15.7329	0.975333	0.350166	0.715642	0.209895	0.000684624	0.00422393	0.987753	0.524906	0.00445005	0.0194913	Mediastinal_3_Bl-04/Mediastinal_3_control
Mediastinal_3_Bl-04/Mediastinal_3_control	Mediastinal	3	Bl-04	path:mmu05161	Hepatitis B	231.363	243.095	2.99177	2.92755	0.00849575	0.00849575	0.0581451	0.00425471	0.403548	0.386557	0.140757	0.0194913	Mediastinal_3_Bl-04/Mediastinal_3_control
Mediastinal_3_Bl-04/Mediastinal_3_control	Mediastinal	3	Bl-04	path:mmu04151	PI3K-Akt signaling pathway	36.2487	71.5404	-0.8233	-0.772789	0.450775	0.41979	0.00112048	0.00433907	0.934179	0.713319	0.00561992	0.0194913	Mediastinal_3_Bl-04/Mediastinal_3_control
Mediastinal_3_Bl-04/Mediastinal_3_control	Mediastinal	3	Bl-04	path:mmu05160	Hepatitis C	14.0005	31.4249	-0.800486	-1.10829	0.270865	0.427786	0.00189983	0.00441119	0.898775	0.714285	0.00805364	0.0194913	Mediastinal_3_Bl-04/Mediastinal_3_control
Mediastinal_3_Bl-04/Mediastinal_3_control	Mediastinal	3	Bl-04	path:mmu04610	Complement and coagulation cascades	5.47184	24.3182	-0.289041	0.316085	0.763618	0.796602	0.000793549	0.0050954	0.987753	0.934033	0.00483569	0.0220028	Mediastinal_3_Bl-04/Mediastinal_3_control
Mediastinal_3_Bl-04/Mediastinal_3_control	Mediastinal	3	Bl-04	path:mmu04650	Natural killer cell mediated cytotoxicity	17.6511	31.5506	-1.07875	-1.18594	0.221889	0.277861	0.00285305	0.00529551	0.896998	0.56695	0.0103508	0.0223588	Mediastinal_3_Bl-04/Mediastinal_3_control
Mediastinal_3_Bl-04/Mediastinal_3_control	Mediastinal	3	Bl-04	path:mmu05162	Measles	26.6489	44.4788	0.717655	0.345014	0.738631	0.486757	0.000881	0.00542543	0.987753	0.787199	0.00520591	0.0224094	Mediastinal_3_Bl-04/Mediastinal_3_control
Mediastinal_3_Bl-04/Mediastinal_3_control	Mediastinal	3	Bl-04	path:mmu04512	ECM-receptor interaction	10.5116	25.7217	0.526002	0.0861239	0.930535	0.597701	0.00074173	0.00571388	0.990219	0.870253	0.00466572	0.0230987	Mediastinal_3_Bl-04/Mediastinal_3_control
Mediastinal_3_Bl-04/Mediastinal_3_control	Mediastinal	3	Bl-04	path:mmu05133	Pertussis	18.3253	30.0496	1.17852	0.685957	0.494753	0.238881	0.00171253	0.00684049	0.94003	0.524906	0.00758962	0.0256988	Mediastinal_3_Bl-04/Mediastinal_3_control
Mediastinal_3_Bl-04/Mediastinal_3_control	Mediastinal	3	Bl-04	path:mmu04217	Necroptosis	38.846	57.7612	0.898454	0.912551	0.363318	0.373313	0.00236848	0.00693398	0.906465	0.666108	0.00923705	0.0256988	Mediastinal_3_Bl-04/Mediastinal_3_control
Mediastinal_3_Bl-04/Mediastinal_3_control	Mediastinal	3	Bl-04	path:mmu05206	MicroRNAs in cancer	0	20.0273		-0.709603	0.476262		0.00182144	0.00698315	0.934179		0.00789289	0.0256988	Mediastinal_3_Bl-04/Mediastinal_3_control
Mediastinal_3_Bl-04/Mediastinal_3_control	Mediastinal	3	Bl-04	path:mmu05168	Herpes simplex virus 1 infection	17.725	55.8595	-0.244052	-0.210357	0.851074	0.812094	0.00103036	0.00704958	0.990219	0.941408	0.00561992	0.0256988	Mediastinal_3_Bl-04/Mediastinal_3_control
Mediastinal_3_Bl-04/Mediastinal_3_control	Mediastinal	3	Bl-04	path:mmu05203	Viral carcinogenesis	0	22.8914	-0.439358	-0.540399	0.587706	0.185407	0.00149215	0.0070498	0.961394	0.524906	0.00709679	0.0256988	Mediastinal_3_Bl-04/Mediastinal_3_control
Mediastinal_3_Bl-04/Mediastinal_3_control	Mediastinal	3	Bl-04	path:mmu05205	Proteoglycans in cancer	35.2643	51.6287	-0.401108	-0.893677	0.38081	0.70015	0.00234722	0.00716861	0.906465	0.910195	0.00923705	0.0256988	Mediastinal_3_Bl-04/Mediastinal_3_control
Mediastinal_3_Bl-04/Mediastinal_3_control	Mediastinal	3	Bl-04	path:mmu04625	C-type lectin receptor signaling pathway	15.7743	28.5325	-0.612426	-0.974514	0.341829	0.548726	0.00300005	0.0080836	0.906465	0.84543	0.0103508	0.0284423	Mediastinal_3_Bl-04/Mediastinal_3_control
Mediastinal_3_Bl-04/Mediastinal_3_control	Mediastinal	3	Bl-04	path:mmu04657	IL-17 signaling pathway	4.47401	20.8318	-1.46747	-0.987747	0.330835	0.132934	0.00428814	0.0107223	0.906465	0.524906	0.014417	0.0370408	Mediastinal_3_Bl-04/Mediastinal_3_control
Mediastinal_3_Bl-04/Mediastinal_3_control	Mediastinal	3	Bl-04	path:mmu05016	Huntington disease	0	30.0178	-0.97735	-0.507575	0.607196	0.162419	0.00302562	0.0134103	0.961394	0.524906	0.0103508	0.0454993	Mediastinal_3_Bl-04/Mediastinal_3_control
Mediastinal_3_Bl-04/Mediastinal_3_control	Mediastinal	3	Bl-04	path:mmu04510	Focal adhesion	32.506	55.9243	-0.159251	-0.112608	0.908546	0.869565	0.00210356	0.0138753	0.990219	0.972473	0.00854572	0.0456963	Mediastinal_3_Bl-04/Mediastinal_3_control
Mediastinal_3_Bl-04/Mediastinal_3_control	Mediastinal	3	Bl-04	path:mmu05322	Systemic lupus erythematosus	7.68797	17.2439	1.12967	0.419527	0.695152	0.136932	0.00276635	0.0139494	0.987753	0.524906	0.0103508	0.0456963	Mediastinal_3_Bl-04/Mediastinal_3_control
Mediastinal_3_Bl-04/Mediastinal_3_control	Mediastinal	3	Bl-04	path:mmu04144	Endocytosis	0	24.3108		-0.880089	0.369315		0.00561178	0.0148786	0.906465		0.0182383	0.0479141	Mediastinal_3_Bl-04/Mediastinal_3_control
Mediastinal_3_Bl-04/Mediastinal_3_control	Mediastinal	3	Bl-04	path:mmu04672	Intestinal immune network for IgA production	4.53384	13.1891	1.59222	0.824468	0.4003	0.0784608	0.00546724	0.0155923	0.906465	0.524906	0.0180697	0.0493755	Mediastinal_3_Bl-04/Mediastinal_3_control
Mediastinal_3_Bl-04/Mediastinal_3_control	Mediastinal	3	Bl-04	path:mmu04370	VEGF signaling pathway	15.439	24.3167	0.152816	-0.257588	0.797601	0.887556	0.00298603	0.0167668	0.987753	0.972473	0.0103508	0.0522244	Mediastinal_3_Bl-04/Mediastinal_3_control
Mediastinal_3_Bl-04/Mediastinal_3_control	Mediastinal	3	Bl-04	path:mmu04330	Notch signaling pathway	4.79749	10.5157	-0.842313	-1.39284	0.148926	0.423288	0.017779	0.0183596	0.839175	0.713319	0.0481514	0.0562632	Mediastinal_3_Bl-04/Mediastinal_3_control
Mediastinal_3_Bl-04/Mediastinal_3_control	Mediastinal	3	Bl-04	path:mmu04622	RIG-I-like receptor signaling pathway	4.30228	15.0876	-0.660519	-0.760483	0.458771	0.52074	0.0062993	0.019786	0.934179	0.817023	0.0198123	0.0596721	Mediastinal_3_Bl-04/Mediastinal_3_control
Mediastinal_3_Bl-04/Mediastinal_3_control	Mediastinal	3	Bl-04	path:mmu05140	Leishmaniasis	14.7864	25.4793	0.825698	0.603056	0.537731	0.413293	0.00592324	0.0214972	0.961394	0.713319	0.0189349	0.0638197	Mediastinal_3_Bl-04/Mediastinal_3_control
Mediastinal_3_Bl-04/Mediastinal_3_control	Mediastinal	3	Bl-04	path:mmu05022	Pathways of neurodegeneration - multiple diseases	15.3013	50.2977	-0.883167	-0.839744	0.398301	0.369815	0.0093499	0.0245526	0.906465	0.666108	0.0269858	0.0717691	Mediastinal_3_Bl-04/Mediastinal_3_control
Mediastinal_3_Bl-04/Mediastinal_3_control	Mediastinal	3	Bl-04	path:mmu04115	p53 signaling pathway	7.94757	19.3474	0.684991	0.556819	0.575712	0.504248	0.00752762	0.027915	0.961394	0.805027	0.0229096	0.0803615	Mediastinal_3_Bl-04/Mediastinal_3_control
Mediastinal_3_Bl-04/Mediastinal_3_control	Mediastinal	3	Bl-04	path:mmu05010	Alzheimer disease	16.6841	47.1984	-0.698336	-0.672562	0.486757	0.444278	0.00941042	0.0292513	0.934179	0.735078	0.0269858	0.082199	Mediastinal_3_Bl-04/Mediastinal_3_control
Mediastinal_3_Bl-04/Mediastinal_3_control	Mediastinal	3	Bl-04	path:mmu05014	Amyotrophic lateral sclerosis	0	28.8122	-1.07887	-0.954994	0.322839	0.143928	0.0142847	0.0294186	0.906465	0.524906	0.0392328	0.082199	Mediastinal_3_Bl-04/Mediastinal_3_control
Mediastinal_3_Bl-04/Mediastinal_3_control	Mediastinal	3	Bl-04	path:mmu04723	Retrograde endocannabinoid signaling	2.44369	18.475	-0.284658	-0.412107	0.677161	0.798601	0.00763654	0.0323956	0.987753	0.934033	0.0229096	0.0879309	Mediastinal_3_Bl-04/Mediastinal_3_control
Mediastinal_3_Bl-04/Mediastinal_3_control	Mediastinal	3	Bl-04	path:mmu05012	Parkinson disease	5.21463	29.7568	-0.450351	-0.270216	0.797601	0.68066	0.00902695	0.042722	0.987753	0.904234	0.0266705	0.112739	Mediastinal_3_Bl-04/Mediastinal_3_control
Mediastinal_3_Bl-04/Mediastinal_3_control	Mediastinal	3	Bl-04	path:mmu05145	Toxoplasmosis	13.5312	28.0844	0.271158	0.328456	0.744128	0.774113	0.0106937	0.0464212	0.987753	0.934033	0.0302214	0.120822	Mediastinal_3_Bl-04/Mediastinal_3_control
Mediastinal_3_Bl-04/Mediastinal_3_control	Mediastinal	3	Bl-04	path:mmu04613	Neutrophil extracellular trap formation	5.57252	20.0896	0.0765096	0.131191	0.89955	0.93903	0.0131368	0.0642642	0.990219	0.972593	0.0365953	0.152628	Mediastinal_3_Bl-04/Mediastinal_3_control
Mediastinal_3_Bl-04/Mediastinal_3_control	Mediastinal	3	Bl-04	path:mmu04514	Cell adhesion molecules							0.000136185				0.00139768		Mediastinal_3_Bl-04/Mediastinal_3_control
