# Supplementary material for: The Effect of Bifidobacterium animalis subsp. lactis Bl-04 on Influenza A Virus Infection in Mice
Source: Microorganisms. 2023 Oct 17;11(10):2582. doi: 10.3390/microorganisms11102582 (PMC10609243; doi:10.3390/microorganisms11102582)
Supplement: Supplementary file 1 [file microorganisms-11-02582-s001.zip › Table S6_Microbiota.xlsx]

## Sheet: Sample_Metadata
SampleID	Cage	SampleType	AnimalNo	StudyDay	Group	DayCombine
1	Cage_1	Duodenum	13807	Day-21	Group2	Baseline
5	Cage_1	Duodenum	13864	Day-21	Group1	Baseline
9	Cage_1	Duodenum	13831	Day-21	Group1	Baseline
13	Cage_1	Duodenum	13829	Day-21	Group2	Baseline
17	Cage_1	Duodenum	13870	Day-21	Group2	Baseline
21	Cage_1	Duodenum	13824	Day-21	Group1	Baseline
25	Cage_1	Duodenum	13878	Day-21	Group1	Baseline
29	Cage_1	Duodenum	13879	Day-21	Group2	Baseline
33	Cage_1	Duodenum	13819	Day-20	Group2	Week1_D-20_-18_-14
37	Cage_1	Duodenum	13856	Day-20	Group1	Week1_D-20_-18_-14
41	Cage_1	Duodenum	13803	Day-20	Group1	Week1_D-20_-18_-14
45	Cage_1	Duodenum	13890	Day-20	Group2	Week1_D-20_-18_-14
49	Cage_1	Duodenum	13830	Day-20	Group1	Week1_D-20_-18_-14
57	Cage_1	Duodenum	13822	Day-20	Group2	Week1_D-20_-18_-14
61	Cage_1	Duodenum	13872	Day-20	Group1	Week1_D-20_-18_-14
65	Cage_1	Duodenum	13851	Day-18	Group1	Week1_D-20_-18_-14
69	Cage_1	Duodenum	13810	Day-18	Group2	Week1_D-20_-18_-14
73	Cage_2	Duodenum	13827	Day-18	Group2	Week1_D-20_-18_-14
77	Cage_1	Duodenum	13881	Day-18	Group1	Week1_D-20_-18_-14
81	Cage_2	Duodenum	13863	Day-18	Group1	Week1_D-20_-18_-14
85	Cage_2	Duodenum	13905	Day-18	Group2	Week1_D-20_-18_-14
89	Cage_1	Duodenum	13908	Day-18	Group2	Week1_D-20_-18_-14
93	Cage_2	Duodenum	13855	Day-18	Group1	Week1_D-20_-18_-14
97	Cage_2	Duodenum	13899	Day-14	Group1	Week1_D-20_-18_-14
101	Cage_2	Duodenum	13796	Day-14	Group2	Week1_D-20_-18_-14
105	Cage_2	Duodenum	13808	Day-14	Group2	Week1_D-20_-18_-14
109	Cage_2	Duodenum	13800	Day-14	Group1	Week1_D-20_-18_-14
113	Cage_2	Duodenum	13871	Day-14	Group1	Week1_D-20_-18_-14
117	Cage_2	Duodenum	13896	Day-14	Group2	Week1_D-20_-18_-14
121	Cage_2	Duodenum	13907	Day-14	Group2	Week1_D-20_-18_-14
125	Cage_2	Duodenum	13804	Day-14	Group1	Week1_D-20_-18_-14
129	Cage_2	Duodenum	13887	Day-7	Group1	Week3_D-7_0
133	Cage_2	Duodenum	13826	Day-7	Group2	Week3_D-7_0
137	Cage_2	Duodenum	13854	Day-7	Group2	Week3_D-7_0
141	Cage_2	Duodenum	13860	Day-7	Group1	Week3_D-7_0
145	Cage_2	Duodenum	13891	Day-7	Group2	Week3_D-7_0
149	Cage_2	Duodenum	13794	Day-7	Group1	Week3_D-7_0
153	Cage_2	Duodenum	13857	Day-7	Group1	Week3_D-7_0
157	Cage_2	Duodenum	13894	Day-7	Group2	Week3_D-7_0
161	Cage_3	Duodenum	13834	Day0	Group2	Week3_D-7_0
165	Cage_3	Duodenum	13883	Day0	Group1	Week3_D-7_0
169	Cage_3	Duodenum	13845	Day0	Group1	Week3_D-7_0
173	Cage_3	Duodenum	13842	Day0	Group2	Week3_D-7_0
177	Cage_3	Duodenum	13875	Day0	Group2	Week3_D-7_0
181	Cage_3	Duodenum	13825	Day0	Group1	Week3_D-7_0
185	Cage_3	Duodenum	13902	Day0	Group1	Week3_D-7_0
189	Cage_3	Duodenum	13848	Day0	Group2	Week3_D-7_0
193	Cage_4	Duodenum	13818	Day3	Group2	Week4_D3_5_7
197	Cage_3	Duodenum	13846	Day3	Group1	Week4_D3_5_7
201	Cage_3	Duodenum	13886	Day3	Group1	Week4_D3_5_7
205	Cage_3	Duodenum	13843	Day3	Group2	Week4_D3_5_7
209	Cage_4	Duodenum	13847	Day3	Group2	Week4_D3_5_7
213	Cage_3	Duodenum	13812	Day3	Group1	Week4_D3_5_7
217	Cage_3	Duodenum	13805	Day3	Group1	Week4_D3_5_7
221	Cage_3	Duodenum	13852	Day3	Group2	Week4_D3_5_7
225	Cage_3	Duodenum	13853	Day3	Group2	Week4_D3_5_7
229	Cage_3	Duodenum	13903	Day3	Group1	Week4_D3_5_7
233	Cage_3	Duodenum	13840	Day3	Group1	Week4_D3_5_7
237	Cage_3	Duodenum	13859	Day3	Group2	Week4_D3_5_7
241	Cage_4	Duodenum	13889	Day3	Group1	Week4_D3_5_7
245	Cage_3	Duodenum	13861	Day3	Group2	Week4_D3_5_7
249	Cage_3	Duodenum	13882	Day3	Group2	Week4_D3_5_7
253	Cage_4	Duodenum	13865	Day3	Group1	Week4_D3_5_7
257	Cage_4	Duodenum	13793	Day5	Group2	Week4_D3_5_7
261	Cage_4	Duodenum	13850	Day5	Group1	Week4_D3_5_7
265	Cage_4	Duodenum	13884	Day5	Group1	Week4_D3_5_7
269	Cage_4	Duodenum	13811	Day5	Group2	Week4_D3_5_7
273	Cage_4	Duodenum	13820	Day5	Group2	Week4_D3_5_7
277	Cage_4	Duodenum	13801	Day5	Group1	Week4_D3_5_7
281	Cage_4	Duodenum	13835	Day5	Group1	Week4_D3_5_7
285	Cage_4	Duodenum	13833	Day5	Group2	Week4_D3_5_7
289	Cage_4	Duodenum	13862	Day5	Group1	Week4_D3_5_7
293	Cage_4	Duodenum	13841	Day5	Group2	Week4_D3_5_7
297	Cage_4	Duodenum	13844	Day5	Group2	Week4_D3_5_7
301	Cage_4	Duodenum	13799	Day5	Group1	Week4_D3_5_7
305	Cage_4	Duodenum	13798	Day5	Group1	Week4_D3_5_7
309	Cage_4	Duodenum	13897	Day5	Group2	Week4_D3_5_7
313	Cage_4	Duodenum	13906	Day5	Group2	Week4_D3_5_7
317	Cage_4	Duodenum	13817	Day5	Group1	Week4_D3_5_7
321	Cage_5	Duodenum	13874	Day7	Group1	Week4_D3_5_7
325	Cage_5	Duodenum	13797	Day7	Group2	Week4_D3_5_7
329	Cage_5	Duodenum	13814	Day7	Group2	Week4_D3_5_7
333	Cage_5	Duodenum	13832	Day7	Group1	Week4_D3_5_7
337	Cage_5	Duodenum	13821	Day7	Group2	Week4_D3_5_7
341	Cage_5	Duodenum	13893	Day7	Group1	Week4_D3_5_7
345	Cage_5	Duodenum	13877	Day7	Group1	Week4_D3_5_7
349	Cage_5	Duodenum	13866	Day7	Group2	Week4_D3_5_7
353	Cage_5	Duodenum	13885	Day7	Group2	Week4_D3_5_7
357	Cage_5	Duodenum	13876	Day7	Group1	Week4_D3_5_7
361	Cage_5	Duodenum	13880	Day7	Group1	Week4_D3_5_7
365	Cage_5	Duodenum	13892	Day7	Group2	Week4_D3_5_7
369	Cage_5	Duodenum	13795	Day7	Group1	Week4_D3_5_7
373	Cage_5	Duodenum	13895	Day7	Group2	Week4_D3_5_7
377	Cage_5	Duodenum	13900	Day7	Group2	Week4_D3_5_7
381	Cage_5	Duodenum	13809	Day7	Group1	Week4_D3_5_7
2	Cage_1	Jejunum	13807	Day-21	Group2	Baseline
6	Cage_1	Jejunum	13864	Day-21	Group1	Baseline
10	Cage_1	Jejunum	13831	Day-21	Group1	Baseline
14	Cage_1	Jejunum	13829	Day-21	Group2	Baseline
18	Cage_1	Jejunum	13870	Day-21	Group2	Baseline
22	Cage_1	Jejunum	13824	Day-21	Group1	Baseline
26	Cage_1	Jejunum	13878	Day-21	Group1	Baseline
30	Cage_1	Jejunum	13879	Day-21	Group2	Baseline
34	Cage_1	Jejunum	13819	Day-20	Group2	Week1_D-20_-18_-14
38	Cage_1	Jejunum	13856	Day-20	Group1	Week1_D-20_-18_-14
42	Cage_1	Jejunum	13803	Day-20	Group1	Week1_D-20_-18_-14
46	Cage_1	Jejunum	13890	Day-20	Group2	Week1_D-20_-18_-14
50	Cage_1	Jejunum	13830	Day-20	Group1	Week1_D-20_-18_-14
58	Cage_1	Jejunum	13822	Day-20	Group2	Week1_D-20_-18_-14
62	Cage_1	Jejunum	13872	Day-20	Group1	Week1_D-20_-18_-14
66	Cage_1	Jejunum	13851	Day-18	Group1	Week1_D-20_-18_-14
70	Cage_1	Jejunum	13810	Day-18	Group2	Week1_D-20_-18_-14
74	Cage_2	Jejunum	13827	Day-18	Group2	Week1_D-20_-18_-14
78	Cage_1	Jejunum	13881	Day-18	Group1	Week1_D-20_-18_-14
82	Cage_2	Jejunum	13863	Day-18	Group1	Week1_D-20_-18_-14
86	Cage_2	Jejunum	13905	Day-18	Group2	Week1_D-20_-18_-14
90	Cage_1	Jejunum	13908	Day-18	Group2	Week1_D-20_-18_-14
94	Cage_2	Jejunum	13855	Day-18	Group1	Week1_D-20_-18_-14
98	Cage_2	Jejunum	13899	Day-14	Group1	Week1_D-20_-18_-14
102	Cage_2	Jejunum	13796	Day-14	Group2	Week1_D-20_-18_-14
106	Cage_2	Jejunum	13808	Day-14	Group2	Week1_D-20_-18_-14
110	Cage_2	Jejunum	13800	Day-14	Group1	Week1_D-20_-18_-14
114	Cage_2	Jejunum	13871	Day-14	Group1	Week1_D-20_-18_-14
118	Cage_2	Jejunum	13896	Day-14	Group2	Week1_D-20_-18_-14
122	Cage_2	Jejunum	13907	Day-14	Group2	Week1_D-20_-18_-14
126	Cage_2	Jejunum	13804	Day-14	Group1	Week1_D-20_-18_-14
130	Cage_2	Jejunum	13887	Day-7	Group1	Week3_D-7_0
134	Cage_2	Jejunum	13826	Day-7	Group2	Week3_D-7_0
138	Cage_2	Jejunum	13854	Day-7	Group2	Week3_D-7_0
142	Cage_2	Jejunum	13860	Day-7	Group1	Week3_D-7_0
146	Cage_2	Jejunum	13891	Day-7	Group2	Week3_D-7_0
150	Cage_2	Jejunum	13794	Day-7	Group1	Week3_D-7_0
154	Cage_2	Jejunum	13857	Day-7	Group1	Week3_D-7_0
158	Cage_2	Jejunum	13894	Day-7	Group2	Week3_D-7_0
162	Cage_3	Jejunum	13834	Day0	Group2	Week3_D-7_0
166	Cage_3	Jejunum	13883	Day0	Group1	Week3_D-7_0
170	Cage_3	Jejunum	13845	Day0	Group1	Week3_D-7_0
174	Cage_3	Jejunum	13842	Day0	Group2	Week3_D-7_0
178	Cage_3	Jejunum	13875	Day0	Group2	Week3_D-7_0
182	Cage_3	Jejunum	13825	Day0	Group1	Week3_D-7_0
186	Cage_3	Jejunum	13902	Day0	Group1	Week3_D-7_0
190	Cage_3	Jejunum	13848	Day0	Group2	Week3_D-7_0
194	Cage_4	Jejunum	13818	Day3	Group2	Week4_D3_5_7
198	Cage_3	Jejunum	13846	Day3	Group1	Week4_D3_5_7
202	Cage_3	Jejunum	13886	Day3	Group1	Week4_D3_5_7
206	Cage_3	Jejunum	13843	Day3	Group2	Week4_D3_5_7
210	Cage_4	Jejunum	13847	Day3	Group2	Week4_D3_5_7
214	Cage_3	Jejunum	13812	Day3	Group1	Week4_D3_5_7
218	Cage_3	Jejunum	13805	Day3	Group1	Week4_D3_5_7
222	Cage_3	Jejunum	13852	Day3	Group2	Week4_D3_5_7
226	Cage_3	Jejunum	13853	Day3	Group2	Week4_D3_5_7
230	Cage_3	Jejunum	13903	Day3	Group1	Week4_D3_5_7
234	Cage_3	Jejunum	13840	Day3	Group1	Week4_D3_5_7
238	Cage_3	Jejunum	13859	Day3	Group2	Week4_D3_5_7
242	Cage_4	Jejunum	13889	Day3	Group1	Week4_D3_5_7
246	Cage_3	Jejunum	13861	Day3	Group2	Week4_D3_5_7
250	Cage_3	Jejunum	13882	Day3	Group2	Week4_D3_5_7
254	Cage_4	Jejunum	13865	Day3	Group1	Week4_D3_5_7
258	Cage_4	Jejunum	13793	Day5	Group2	Week4_D3_5_7
262	Cage_4	Jejunum	13850	Day5	Group1	Week4_D3_5_7
266	Cage_4	Jejunum	13884	Day5	Group1	Week4_D3_5_7
270	Cage_4	Jejunum	13811	Day5	Group2	Week4_D3_5_7
274	Cage_4	Jejunum	13820	Day5	Group2	Week4_D3_5_7
278	Cage_4	Jejunum	13801	Day5	Group1	Week4_D3_5_7
282	Cage_4	Jejunum	13835	Day5	Group1	Week4_D3_5_7
286	Cage_4	Jejunum	13833	Day5	Group2	Week4_D3_5_7
290	Cage_4	Jejunum	13862	Day5	Group1	Week4_D3_5_7
294	Cage_4	Jejunum	13841	Day5	Group2	Week4_D3_5_7
298	Cage_4	Jejunum	13844	Day5	Group2	Week4_D3_5_7
302	Cage_4	Jejunum	13799	Day5	Group1	Week4_D3_5_7
306	Cage_4	Jejunum	13798	Day5	Group1	Week4_D3_5_7
310	Cage_4	Jejunum	13897	Day5	Group2	Week4_D3_5_7
318	Cage_4	Jejunum	13817	Day5	Group1	Week4_D3_5_7
322	Cage_5	Jejunum	13874	Day7	Group1	Week4_D3_5_7
326	Cage_5	Jejunum	13797	Day7	Group2	Week4_D3_5_7
330	Cage_5	Jejunum	13814	Day7	Group2	Week4_D3_5_7
334	Cage_5	Jejunum	13832	Day7	Group1	Week4_D3_5_7
338	Cage_5	Jejunum	13821	Day7	Group2	Week4_D3_5_7
342	Cage_5	Jejunum	13893	Day7	Group1	Week4_D3_5_7
346	Cage_5	Jejunum	13877	Day7	Group1	Week4_D3_5_7
350	Cage_5	Jejunum	13866	Day7	Group2	Week4_D3_5_7
354	Cage_5	Jejunum	13885	Day7	Group2	Week4_D3_5_7
358	Cage_5	Jejunum	13876	Day7	Group1	Week4_D3_5_7
362	Cage_5	Jejunum	13880	Day7	Group1	Week4_D3_5_7
366	Cage_5	Jejunum	13892	Day7	Group2	Week4_D3_5_7
370	Cage_5	Jejunum	13795	Day7	Group1	Week4_D3_5_7
374	Cage_5	Jejunum	13895	Day7	Group2	Week4_D3_5_7
378	Cage_5	Jejunum	13900	Day7	Group2	Week4_D3_5_7
382	Cage_5	Jejunum	13809	Day7	Group1	Week4_D3_5_7
3	Cage_1	Ileum	13807	Day-21	Group2	Baseline
7	Cage_1	Ileum	13864	Day-21	Group1	Baseline
11	Cage_1	Ileum	13831	Day-21	Group1	Baseline
15	Cage_1	Ileum	13829	Day-21	Group2	Baseline
19	Cage_1	Ileum	13870	Day-21	Group2	Baseline
23	Cage_1	Ileum	13824	Day-21	Group1	Baseline
27	Cage_1	Ileum	13878	Day-21	Group1	Baseline
31	Cage_1	Ileum	13879	Day-21	Group2	Baseline
35	Cage_1	Ileum	13819	Day-20	Group2	Week1_D-20_-18_-14
39	Cage_1	Ileum	13856	Day-20	Group1	Week1_D-20_-18_-14
43	Cage_1	Ileum	13803	Day-20	Group1	Week1_D-20_-18_-14
47	Cage_1	Ileum	13890	Day-20	Group2	Week1_D-20_-18_-14
51	Cage_1	Ileum	13830	Day-20	Group1	Week1_D-20_-18_-14
55	Cage_1	Ileum	13873	Day-20	Group2	Week1_D-20_-18_-14
59	Cage_1	Ileum	13822	Day-20	Group2	Week1_D-20_-18_-14
63	Cage_1	Ileum	13872	Day-20	Group1	Week1_D-20_-18_-14
67	Cage_1	Ileum	13851	Day-18	Group1	Week1_D-20_-18_-14
71	Cage_1	Ileum	13810	Day-18	Group2	Week1_D-20_-18_-14
75	Cage_2	Ileum	13827	Day-18	Group2	Week1_D-20_-18_-14
79	Cage_1	Ileum	13881	Day-18	Group1	Week1_D-20_-18_-14
83	Cage_2	Ileum	13863	Day-18	Group1	Week1_D-20_-18_-14
87	Cage_2	Ileum	13905	Day-18	Group2	Week1_D-20_-18_-14
91	Cage_1	Ileum	13908	Day-18	Group2	Week1_D-20_-18_-14
95	Cage_2	Ileum	13855	Day-18	Group1	Week1_D-20_-18_-14
99	Cage_2	Ileum	13899	Day-14	Group1	Week1_D-20_-18_-14
103	Cage_2	Ileum	13796	Day-14	Group2	Week1_D-20_-18_-14
107	Cage_2	Ileum	13808	Day-14	Group2	Week1_D-20_-18_-14
111	Cage_2	Ileum	13800	Day-14	Group1	Week1_D-20_-18_-14
115	Cage_2	Ileum	13871	Day-14	Group1	Week1_D-20_-18_-14
119	Cage_2	Ileum	13896	Day-14	Group2	Week1_D-20_-18_-14
123	Cage_2	Ileum	13907	Day-14	Group2	Week1_D-20_-18_-14
127	Cage_2	Ileum	13804	Day-14	Group1	Week1_D-20_-18_-14
131	Cage_2	Ileum	13887	Day-7	Group1	Week3_D-7_0
135	Cage_2	Ileum	13826	Day-7	Group2	Week3_D-7_0
139	Cage_2	Ileum	13854	Day-7	Group2	Week3_D-7_0
143	Cage_2	Ileum	13860	Day-7	Group1	Week3_D-7_0
147	Cage_2	Ileum	13891	Day-7	Group2	Week3_D-7_0
151	Cage_2	Ileum	13794	Day-7	Group1	Week3_D-7_0
155	Cage_2	Ileum	13857	Day-7	Group1	Week3_D-7_0
159	Cage_2	Ileum	13894	Day-7	Group2	Week3_D-7_0
163	Cage_3	Ileum	13834	Day0	Group2	Week3_D-7_0
167	Cage_3	Ileum	13883	Day0	Group1	Week3_D-7_0
171	Cage_3	Ileum	13845	Day0	Group1	Week3_D-7_0
175	Cage_3	Ileum	13842	Day0	Group2	Week3_D-7_0
179	Cage_3	Ileum	13875	Day0	Group2	Week3_D-7_0
183	Cage_3	Ileum	13825	Day0	Group1	Week3_D-7_0
187	Cage_3	Ileum	13902	Day0	Group1	Week3_D-7_0
191	Cage_3	Ileum	13848	Day0	Group2	Week3_D-7_0
195	Cage_4	Ileum	13818	Day3	Group2	Week4_D3_5_7
199	Cage_3	Ileum	13846	Day3	Group1	Week4_D3_5_7
203	Cage_3	Ileum	13886	Day3	Group1	Week4_D3_5_7
207	Cage_3	Ileum	13843	Day3	Group2	Week4_D3_5_7
211	Cage_4	Ileum	13847	Day3	Group2	Week4_D3_5_7
215	Cage_3	Ileum	13812	Day3	Group1	Week4_D3_5_7
219	Cage_3	Ileum	13805	Day3	Group1	Week4_D3_5_7
223	Cage_3	Ileum	13852	Day3	Group2	Week4_D3_5_7
227	Cage_3	Ileum	13853	Day3	Group2	Week4_D3_5_7
231	Cage_3	Ileum	13903	Day3	Group1	Week4_D3_5_7
235	Cage_3	Ileum	13840	Day3	Group1	Week4_D3_5_7
239	Cage_3	Ileum	13859	Day3	Group2	Week4_D3_5_7
243	Cage_4	Ileum	13889	Day3	Group1	Week4_D3_5_7
247	Cage_3	Ileum	13861	Day3	Group2	Week4_D3_5_7
251	Cage_3	Ileum	13882	Day3	Group2	Week4_D3_5_7
255	Cage_4	Ileum	13865	Day3	Group1	Week4_D3_5_7
259	Cage_4	Ileum	13793	Day5	Group2	Week4_D3_5_7
263	Cage_4	Ileum	13850	Day5	Group1	Week4_D3_5_7
267	Cage_4	Ileum	13884	Day5	Group1	Week4_D3_5_7
271	Cage_4	Ileum	13811	Day5	Group2	Week4_D3_5_7
275	Cage_4	Ileum	13820	Day5	Group2	Week4_D3_5_7
279	Cage_4	Ileum	13801	Day5	Group1	Week4_D3_5_7
283	Cage_4	Ileum	13835	Day5	Group1	Week4_D3_5_7
287	Cage_4	Ileum	13833	Day5	Group2	Week4_D3_5_7
291	Cage_4	Ileum	13862	Day5	Group1	Week4_D3_5_7
295	Cage_4	Ileum	13841	Day5	Group2	Week4_D3_5_7
299	Cage_4	Ileum	13844	Day5	Group2	Week4_D3_5_7
303	Cage_4	Ileum	13799	Day5	Group1	Week4_D3_5_7
307	Cage_4	Ileum	13798	Day5	Group1	Week4_D3_5_7
311	Cage_4	Ileum	13897	Day5	Group2	Week4_D3_5_7
319	Cage_4	Ileum	13817	Day5	Group1	Week4_D3_5_7
323	Cage_5	Ileum	13874	Day7	Group1	Week4_D3_5_7
327	Cage_5	Ileum	13797	Day7	Group2	Week4_D3_5_7
331	Cage_5	Ileum	13814	Day7	Group2	Week4_D3_5_7
335	Cage_5	Ileum	13832	Day7	Group1	Week4_D3_5_7
339	Cage_5	Ileum	13821	Day7	Group2	Week4_D3_5_7
343	Cage_5	Ileum	13893	Day7	Group1	Week4_D3_5_7
347	Cage_5	Ileum	13877	Day7	Group1	Week4_D3_5_7
351	Cage_5	Ileum	13866	Day7	Group2	Week4_D3_5_7
355	Cage_5	Ileum	13885	Day7	Group2	Week4_D3_5_7
359	Cage_5	Ileum	13876	Day7	Group1	Week4_D3_5_7
363	Cage_5	Ileum	13880	Day7	Group1	Week4_D3_5_7
367	Cage_5	Ileum	13892	Day7	Group2	Week4_D3_5_7
371	Cage_5	Ileum	13795	Day7	Group1	Week4_D3_5_7
375	Cage_5	Ileum	13895	Day7	Group2	Week4_D3_5_7
379	Cage_5	Ileum	13900	Day7	Group2	Week4_D3_5_7
383	Cage_5	Ileum	13809	Day7	Group1	Week4_D3_5_7
4	Cage_1	Caecum	13807	Day-21	Group2	Baseline
8	Cage_1	Caecum	13864	Day-21	Group1	Baseline
12	Cage_1	Caecum	13831	Day-21	Group1	Baseline
16	Cage_1	Caecum	13829	Day-21	Group2	Baseline
20	Cage_1	Caecum	13870	Day-21	Group2	Baseline
24	Cage_1	Caecum	13824	Day-21	Group1	Baseline
28	Cage_1	Caecum	13878	Day-21	Group1	Baseline
32	Cage_1	Caecum	13879	Day-21	Group2	Baseline
36	Cage_1	Caecum	13819	Day-20	Group2	Week1_D-20_-18_-14
40	Cage_1	Caecum	13856	Day-20	Group1	Week1_D-20_-18_-14
44	Cage_1	Caecum	13803	Day-20	Group1	Week1_D-20_-18_-14
48	Cage_1	Caecum	13890	Day-20	Group2	Week1_D-20_-18_-14
52	Cage_1	Caecum	13830	Day-20	Group1	Week1_D-20_-18_-14
56	Cage_1	Caecum	13873	Day-20	Group2	Week1_D-20_-18_-14
60	Cage_1	Caecum	13822	Day-20	Group2	Week1_D-20_-18_-14
64	Cage_1	Caecum	13872	Day-20	Group1	Week1_D-20_-18_-14
68	Cage_1	Caecum	13851	Day-18	Group1	Week1_D-20_-18_-14
72	Cage_1	Caecum	13810	Day-18	Group2	Week1_D-20_-18_-14
76	Cage_2	Caecum	13827	Day-18	Group2	Week1_D-20_-18_-14
80	Cage_1	Caecum	13881	Day-18	Group1	Week1_D-20_-18_-14
84	Cage_2	Caecum	13863	Day-18	Group1	Week1_D-20_-18_-14
88	Cage_2	Caecum	13905	Day-18	Group2	Week1_D-20_-18_-14
92	Cage_1	Caecum	13908	Day-18	Group2	Week1_D-20_-18_-14
96	Cage_2	Caecum	13855	Day-18	Group1	Week1_D-20_-18_-14
100	Cage_2	Caecum	13899	Day-14	Group1	Week1_D-20_-18_-14
104	Cage_2	Caecum	13796	Day-14	Group2	Week1_D-20_-18_-14
108	Cage_2	Caecum	13808	Day-14	Group2	Week1_D-20_-18_-14
112	Cage_2	Caecum	13800	Day-14	Group1	Week1_D-20_-18_-14
116	Cage_2	Caecum	13871	Day-14	Group1	Week1_D-20_-18_-14
120	Cage_2	Caecum	13896	Day-14	Group2	Week1_D-20_-18_-14
124	Cage_2	Caecum	13907	Day-14	Group2	Week1_D-20_-18_-14
128	Cage_2	Caecum	13804	Day-14	Group1	Week1_D-20_-18_-14
132	Cage_2	Caecum	13887	Day-7	Group1	Week3_D-7_0
136	Cage_2	Caecum	13826	Day-7	Group2	Week3_D-7_0
140	Cage_2	Caecum	13854	Day-7	Group2	Week3_D-7_0
144	Cage_2	Caecum	13860	Day-7	Group1	Week3_D-7_0
152	Cage_2	Caecum	13794	Day-7	Group1	Week3_D-7_0
160	Cage_2	Caecum	13894	Day-7	Group2	Week3_D-7_0
164	Cage_3	Caecum	13834	Day0	Group2	Week3_D-7_0
168	Cage_3	Caecum	13883	Day0	Group1	Week3_D-7_0
172	Cage_3	Caecum	13845	Day0	Group1	Week3_D-7_0
176	Cage_3	Caecum	13842	Day0	Group2	Week3_D-7_0
180	Cage_3	Caecum	13875	Day0	Group2	Week3_D-7_0
184	Cage_3	Caecum	13825	Day0	Group1	Week3_D-7_0
188	Cage_3	Caecum	13902	Day0	Group1	Week3_D-7_0
192	Cage_3	Caecum	13848	Day0	Group2	Week3_D-7_0
196	Cage_4	Caecum	13818	Day3	Group2	Week4_D3_5_7
200	Cage_3	Caecum	13846	Day3	Group1	Week4_D3_5_7
204	Cage_3	Caecum	13886	Day3	Group1	Week4_D3_5_7
208	Cage_3	Caecum	13843	Day3	Group2	Week4_D3_5_7
212	Cage_4	Caecum	13847	Day3	Group2	Week4_D3_5_7
216	Cage_3	Caecum	13812	Day3	Group1	Week4_D3_5_7
220	Cage_3	Caecum	13805	Day3	Group1	Week4_D3_5_7
224	Cage_3	Caecum	13852	Day3	Group2	Week4_D3_5_7
228	Cage_3	Caecum	13853	Day3	Group2	Week4_D3_5_7
232	Cage_3	Caecum	13903	Day3	Group1	Week4_D3_5_7
236	Cage_3	Caecum	13840	Day3	Group1	Week4_D3_5_7
240	Cage_3	Caecum	13859	Day3	Group2	Week4_D3_5_7
244	Cage_4	Caecum	13889	Day3	Group1	Week4_D3_5_7
248	Cage_3	Caecum	13861	Day3	Group2	Week4_D3_5_7
252	Cage_3	Caecum	13882	Day3	Group2	Week4_D3_5_7
256	Cage_4	Caecum	13865	Day3	Group1	Week4_D3_5_7
260	Cage_4	Caecum	13793	Day5	Group2	Week4_D3_5_7
264	Cage_4	Caecum	13850	Day5	Group1	Week4_D3_5_7
268	Cage_4	Caecum	13884	Day5	Group1	Week4_D3_5_7
272	Cage_4	Caecum	13811	Day5	Group2	Week4_D3_5_7
276	Cage_4	Caecum	13820	Day5	Group2	Week4_D3_5_7
280	Cage_4	Caecum	13801	Day5	Group1	Week4_D3_5_7
284	Cage_4	Caecum	13835	Day5	Group1	Week4_D3_5_7
288	Cage_4	Caecum	13833	Day5	Group2	Week4_D3_5_7
292	Cage_4	Caecum	13862	Day5	Group1	Week4_D3_5_7
296	Cage_4	Caecum	13841	Day5	Group2	Week4_D3_5_7
300	Cage_4	Caecum	13844	Day5	Group2	Week4_D3_5_7
304	Cage_4	Caecum	13799	Day5	Group1	Week4_D3_5_7
308	Cage_4	Caecum	13798	Day5	Group1	Week4_D3_5_7
312	Cage_4	Caecum	13897	Day5	Group2	Week4_D3_5_7
316	Cage_4	Caecum	13906	Day5	Group2	Week4_D3_5_7
320	Cage_4	Caecum	13817	Day5	Group1	Week4_D3_5_7
324	Cage_5	Caecum	13874	Day7	Group1	Week4_D3_5_7
328	Cage_5	Caecum	13797	Day7	Group2	Week4_D3_5_7
332	Cage_5	Caecum	13814	Day7	Group2	Week4_D3_5_7
336	Cage_5	Caecum	13832	Day7	Group1	Week4_D3_5_7
340	Cage_5	Caecum	13821	Day7	Group2	Week4_D3_5_7
344	Cage_5	Caecum	13893	Day7	Group1	Week4_D3_5_7
348	Cage_5	Caecum	13877	Day7	Group1	Week4_D3_5_7
352	Cage_5	Caecum	13866	Day7	Group2	Week4_D3_5_7
356	Cage_5	Caecum	13885	Day7	Group2	Week4_D3_5_7
360	Cage_5	Caecum	13876	Day7	Group1	Week4_D3_5_7
364	Cage_5	Caecum	13880	Day7	Group1	Week4_D3_5_7
368	Cage_5	Caecum	13892	Day7	Group2	Week4_D3_5_7
372	Cage_5	Caecum	13795	Day7	Group1	Week4_D3_5_7
376	Cage_5	Caecum	13895	Day7	Group2	Week4_D3_5_7
380	Cage_5	Caecum	13900	Day7	Group2	Week4_D3_5_7
384	Cage_5	Caecum	13809	Day7	Group1	Week4_D3_5_7

## Sheet: Duodenum_ASV>0.1%
SampleID	101	105	113	117	121	125	137	141	153	161	165	169	173	177	181	185	201	233	249	257	265	273	289	297	309	313	317	345	349	369	377	41	65	69	73	77	81	85	93	97
95fdd816723ca482a5caba10bea171c8	20	34	298	1568	578	11	2541	9962	5106	6606	28118	10272	26754	5332	20287	2878	2096	2000	7618	4479	6462	5943	2158	11937	1354	2302	1993	4033	3015	6302	6814	5039	2773	14062	2373	11459	604	331	136	13
72e530a4206f2e4804d502f4dfca8387	0	8	77	511	170	0	2476	1235	755	4082	3462	2570	6090	9770	24027	1278	4877	511	375	0	20	2433	5243	7523	3857	6818	5687	25	1628	927	176	0	19	293	0	0	104	17	3	0
f434bb1f62e53ad7aed6f6ffd2ec039c	0	0	0	290	49	0	523	2095	971	1356	5688	1916	5481	1045	4050	586	389	350	1644	798	1197	1216	430	2272	282	468	400	748	582	1074	1358	1021	478	2629	445	2239	92	0	0	0
707740d13076516032127f753473cfc3	0	0	7	0	0	0	36	0	11	0	63	0	40	113	143	0	0	127	88	0	41	0	58	14	11	5098	1311	60	25	297	2267	0	13	81	0	0	0	0	0	0
7b28c20e72c6c95b3e604f0849245770	0	0	7	0	0	0	0	0	0	0	537	0	0	0	1776	2	0	0	0	0	0	0	0	62	4	0	4632	31	14	0	104	0	20	0	0	0	12	0	0	0
83675d30639c20d61e9f59c2b956ee5b	0	0	17	29	0	0	0	0	0	0	0	0	0	0	0	0	0	59	33	0	0	20	0	0	12	2126	1589	16	0	87	15	0	3	172	0	20	0	0	0	0
15029a53d91a033bae30c1ad032ad804	0	0	0	26	9	0	0	0	0	0	0	0	10	0	146	0	0	13	0	0	0	0	30	0	67	1214	430	0	0	111	277	0	109	172	0	0	0	0	0	0
e4ef1c7b616eb842c0ff7a327e83bd76	0	0	0	0	0	0	0	0	0	0	0	0	0	0	5	0	0	17	44	0	0	0	0	0	0	710	821	0	0	0	12	0	0	19	0	0	0	0	0	0
b8455681fc92d051fdd023aa62417fb3	0	0	0	0	0	0	0	31	0	0	19	91	11	51	79	109	0	0	0	0	15	0	131	0	24	842	0	0	11	343	210	491	0	0	0	0	0	0	0	0
9d88acce7b2f13b58bf95d2f17ec8c2f	0	0	0	0	0	0	0	0	0	0	0	0	0	25	10	0	0	16	18	0	0	0	0	0	0	0	1060	0	0	0	37	0	0	0	0	0	0	0	0	0
bf34422106e5974ddf75216e2c05273c	0	0	0	0	0	0	0	0	0	0	11	0	21	49	99	0	0	28	24	0	0	0	0	27	6	766	224	0	0	153	7	0	0	24	0	7	8	0	0	0
6b8307a0222360f36caf7065c78ff424	0	0	0	0	0	0	0	0	0	0	0	0	10	0	0	0	0	7	10	0	0	0	37	5	23	0	2692	0	0	18	19	0	6	8	0	33	0	0	0	0
1c4f71b06ad9d613e117b633de27a107	0	0	0	0	0	0	0	0	0	0	17	0	0	0	0	0	0	13	12	0	0	0	0	0	0	958	508	0	0	0	0	0	0	0	0	0	0	0	0	0
6c921e3ae0af506f54295d074ca071bc	0	0	7	0	0	0	0	51	0	0	67	0	187	354	1002	0	0	43	6	0	40	0	0	0	0	1997	757	0	0	0	0	0	0	43	0	421	0	0	0	0
8da18b476b64f6f053647455b6890f80	0	0	15	0	0	0	0	0	3	0	0	11	10	12	33	0	0	14	17	0	0	0	0	3	0	690	391	0	0	10	5	0	0	0	0	12	0	3	0	0
9c6688b479e664fa9d070647653e49ed	0	0	0	0	0	0	0	0	21	0	0	0	57	91	102	0	0	0	0	0	0	0	0	0	0	1448	1432	0	0	73	4663	0	20	0	0	0	0	0	0	0
9e3b0ce9bb690b78f97f20c102089c55	0	0	0	4	0	0	0	0	0	0	0	0	0	0	0	0	0	0	13	0	0	0	0	0	8	1204	227	0	0	0	728	0	0	129	0	22	0	0	0	0
0a3cf58d4ca062c13d42c9db4ebcbc53	0	0	0	0	0	0	62	0	0	0	21	1177	0	0	16	0	0	831	1082	8	1067	7	0	22	55	0	0	267	0	0	6	63	0	187	107	0	0	0	0	12
208a08b90e13b04d2ef2f584535a2d39	0	0	0	0	0	0	0	0	0	0	4	0	0	3	0	0	0	23	11	0	0	0	0	0	0	96	151	0	0	0	884	0	0	21	0	0	0	0	0	0
cdb79eecfa38ac58e99bfdef45fabfce	0	0	0	10	0	0	0	8	0	0	85	188	28	92	842	0	0	0	0	0	0	0	99	0	0	2410	92	4	9	9	2553	0	37	0	0	0	0	0	0	0
b18037a224663cf99b188ff37ab195d4	0	0	0	3	0	0	142	51	80	57	75	0	317	100	2821	25	92	0	0	0	0	27	7	59	25	497	233	0	99	36	9	0	0	161	0	0	0	0	0	0
3ee3085cd6f25c2449332df3675b9eee	0	0	0	0	0	0	0	0	0	0	0	0	0	0	12	0	0	0	15	0	0	0	0	0	6	2964	95	0	0	24	282	0	0	0	0	0	0	0	0	0
e3055f1b3a2ef5ffe239567f02e0e758	0	0	7	12	0	0	0	4	4	0	0	0	29	44	28	0	16	64	133	871	227	0	130	54	36	0	6	243	0	29	224	0	0	169	13	0	0	17	0	0
5f1f6453ad88dc836876671d27f97f58	0	0	0	6	0	0	10	0	0	0	43	5	196	183	1143	10	0	16	0	0	0	0	0	0	0	145	24	0	0	0	0	31	4	74	0	105	11	11	0	0
65d43491988bfe557da4d86a5ba25dae	292	421	387	291	245	156	0	0	0	0	0	57	0	96	0	6	128	0	0	573	195	9	81	73	35	7	53	11	0	39	76	0	566	430	398	212	210	419	364	359
b03d2e5ac94c7a0d115e5c542e9315e8	1095	1214	845	1315	1063	897	0	0	0	0	0	0	0	0	0	0	0	0	0	0	0	0	0	0	0	0	0	0	0	0	0	0	1555	1770	1206	1014	1586	876	1192	715
b65410081c87ed629211d7fb136ec45f	0	0	0	0	0	0	0	0	0	0	0	0	0	0	3	0	0	26	16	0	0	0	0	0	0	813	546	0	0	0	138	0	0	19	0	0	0	0	0	0
44617e596cc9489738060db649cd3673	0	0	0	0	0	0	0	0	0	0	0	0	0	0	30	0	0	20	45	0	0	61	0	45	88	735	1097	8	0	141	2959	0	0	0	0	20	7	0	0	0
958d78a02bef69a795806f97adb117ea	0	0	0	0	0	0	0	0	0	0	0	0	4	0	38	0	0	0	0	0	0	0	0	0	0	546	513	0	0	0	0	0	0	39	0	0	0	0	0	0
4ae33466f29277f3cba0834c894ee4a4	0	0	0	0	0	0	0	0	0	0	0	0	0	0	0	0	0	0	0	0	0	35	0	0	0	1368	1175	0	0	0	1459	0	0	0	0	0	0	0	0	0
c220411c349b8a75624ff17ef6fd3923	0	0	0	0	0	0	0	0	0	0	8	0	39	0	74	0	0	0	0	0	0	0	0	0	0	1289	76	4	0	23	0	0	0	26	0	33	0	0	0	0
37a7e187d35366eb6167cbe90e558af1	0	0	0	0	0	0	0	0	0	0	242	0	0	128	1115	0	0	0	3	0	0	30	0	31	20	1339	98	0	0	0	0	0	0	0	0	6	0	0	0	0
ecb3759e804e8c86d9fb0de817207fe9	0	0	0	0	0	0	0	0	8	0	9	0	0	12	64	0	0	0	17	0	0	0	0	0	0	333	351	0	0	0	0	0	5	12	0	0	0	3	0	0
41968913d9ca2d9dfd73c99f7947bb01	0	0	0	0	0	0	5	0	0	0	0	0	30	79	59	0	0	0	0	0	0	0	0	0	0	483	534	0	0	69	288	0	18	56	0	0	0	0	0	0
f4c7676e8043df7074244706adb77375	0	0	0	0	0	0	4	73	65	2	14	0	0	724	215	0	0	0	0	0	0	5	24	5	0	1043	367	0	6	20	514	0	4	52	0	0	0	0	0	0
11401ee29264e6f60b65371a2601cd07	0	0	0	0	0	0	0	0	0	0	17	0	0	0	11	0	0	0	5	0	4	0	6	0	15	716	359	0	0	27	10	0	0	7	0	12	0	0	0	0
f3e9d78daeea42d345080748e31ae3dd	0	0	0	0	0	0	0	0	0	0	0	0	0	0	18	0	10	0	0	0	0	0	0	0	0	620	286	0	0	0	0	0	0	0	0	0	0	0	0	0
e7dd01d01c0203abc3708549d99e4e9c	0	0	0	0	0	0	0	0	0	62	12	0	0	0	36	6	0	117	694	359	83	0	133	47	0	0	0	0	0	0	107	5	0	55	12	0	0	0	0	0
3dfaa3fabdf04711351c97af550d2921	0	0	0	0	0	0	0	0	0	0	0	0	0	0	9	0	0	0	0	0	0	0	0	0	0	0	2553	0	0	0	22	0	0	0	0	0	0	0	0	0
1b23e74fb43b2b8a2d20b91679cf8e0e	27	104	26	125	103	83	0	0	0	0	18	0	0	0	134	0	52	35	89	0	39	0	0	0	0	14	0	0	0	3396	0	0	148	72	57	91	126	1972	41	55
c3ff4c29778c6c86865687a4061a3382	0	0	0	0	0	0	0	0	0	0	0	0	0	0	60	0	0	0	0	0	0	0	0	0	0	351	284	0	0	0	121	0	4	40	0	0	0	0	0	0
af140e3881d1c74ce8b17a5c8979dfa5	0	0	0	0	0	0	0	5	0	0	51	0	14	540	717	0	14	0	0	0	0	0	0	0	3	102	130	0	0	0	0	0	6	32	0	10	0	0	0	0
e91c619cb40c81228289adf178ee2b99	0	0	24	0	0	0	0	0	0	0	0	0	0	0	0	0	0	0	12	0	0	0	0	8	27	593	31	0	0	4	810	9	0	0	0	26	0	0	0	0
c0d5395792eadbf5f62e8ffb14fa0262	0	0	0	0	0	0	8	0	0	0	32	267	0	0	17	0	0	255	346	0	255	5	0	42	0	0	0	50	0	0	16	39	0	8	0	0	0	0	0	0
d4b8175c2cc6c6722d5d45082d4fd64d	0	0	0	0	0	0	0	0	0	0	0	25	0	112	0	0	0	0	0	0	0	0	0	36	8	0	1609	0	0	0	429	0	0	0	0	46	0	0	0	0
5be31cfb3ad61e104009ab6fb46f6d7b	0	0	0	0	0	0	0	0	0	0	319	8	0	0	2864	46	260	0	0	0	0	34	28	80	52	224	220	0	0	0	0	0	0	0	0	0	0	0	0	0
881827d013845a8d4e929224f9fd24e1	0	0	0	0	0	0	0	0	0	0	0	0	14	0	0	0	0	37	0	0	0	0	8	0	0	0	1259	0	0	0	1853	0	0	0	0	0	0	0	0	0
e5f421f77127c381ff85107a2d059a54	0	0	0	0	0	0	0	0	0	0	0	0	0	133	8	0	0	0	0	0	0	0	0	20	11	234	573	0	0	0	21	0	0	0	0	0	0	0	0	0
b44aff2995f396f00ad579d8e6684335	0	0	0	0	0	0	0	0	0	0	340	24	0	0	2917	35	246	94	0	0	0	39	23	0	33	233	197	0	0	61	0	0	0	0	0	0	0	0	0	0
2ef1e51ab1cf99a3c6417b05a060830e	0	0	0	0	0	0	0	0	0	0	0	166	0	0	968	593	222	2661	0	0	0	0	0	0	0	0	0	0	0	0	0	0	0	0	0	0	0	0	0	0
ec6665f4d7bda38bfb9ebcac845d2067	758	754	486	539	438	405	0	0	0	0	0	0	0	0	0	0	0	0	0	0	0	0	0	0	0	0	0	0	0	0	0	0	1109	1369	710	707	545	617	444	459
227262067d4e6d71cd179bc7f7a5d1c4	0	0	0	0	0	0	0	0	0	0	0	204	0	0	52	0	0	0	0	0	0	7	0	0	0	0	763	0	0	0	1687	0	10	36	0	0	0	0	0	0
8c65d91e013525d1c8606fab40e0a88b	0	0	0	0	0	0	0	0	0	0	0	0	0	0	0	0	0	26	0	0	7	0	10	0	0	436	261	0	0	48	0	7	0	0	0	0	0	0	0	0
8135beec331a8d558070c38b580e4b8e	0	7	19	34	44	21	0	0	0	10	206	0	193	1448	385	20	29	37	0	0	2	0	35	0	21	200	450	0	0	0	16	0	46	88	44	10	31	30	41	0
49542b70535b5b25483a9220abd05093	0	0	0	0	0	0	0	9	4	0	8	0	22	194	328	0	0	0	0	0	0	0	0	0	0	407	30	0	4	0	0	0	0	0	0	95	0	0	0	0
ef3a40c4f26b5019887d73ceaaab84f2	0	0	0	0	0	0	0	0	0	0	0	0	0	0	0	0	0	0	0	0	70	0	0	0	0	234	0	0	0	0	475	21	23	0	0	0	0	0	0	0
4d887dbbcf25a86825b7ea380b9c395b	0	0	30	0	0	0	0	0	0	0	0	0	0	0	0	0	0	0	21	0	0	0	0	21	8	542	0	0	0	0	2115	0	0	0	0	47	0	0	0	0
54e0174aa8565daf971f0e40d489b6c0	0	0	4	0	0	0	0	0	0	0	0	21	0	0	0	0	0	0	0	0	0	0	0	0	0	237	0	0	0	217	432	0	0	0	0	28	0	0	0	0
1fdb09b154f347c35de3aad68774cb79	0	0	0	0	0	0	0	0	0	0	0	0	21	0	21	0	0	0	0	0	0	0	0	0	0	592	405	0	0	0	206	0	0	0	0	0	0	0	0	0
d9868507ed2f950a7acfcf9ed2b6a95b	0	0	0	0	0	0	0	0	0	12	0	0	0	28	0	0	0	0	0	0	0	0	0	0	0	300	147	0	0	273	0	0	0	36	0	0	0	0	0	0
1b9ab7ba8573cbfe5f1a9f59f0b38ff4	0	0	9	0	0	0	37	0	0	0	16	20	70	60	386	16	136	0	0	0	0	0	38	53	6	72	53	0	0	59	0	0	47	95	0	203	0	6	0	10
81f59f6a76c8682de1719c97b5b24173	0	0	0	0	0	0	0	0	0	0	7	0	7	0	79	0	0	0	0	0	0	0	13	3	0	255	154	0	0	0	362	0	0	0	0	15	0	0	0	0
2f8ad4365632e4a05d8897ac4ee70b3a	0	0	0	0	0	0	0	0	0	0	0	104	0	0	548	365	172	1490	0	0	0	0	0	0	0	0	0	0	0	0	0	0	0	0	0	0	0	0	0	0
b301115074f6e3de36efa48b692c7f8b	0	0	0	0	0	0	0	0	0	0	0	0	0	0	16	0	0	0	0	0	0	0	6	0	0	0	533	0	0	0	208	0	0	0	0	0	0	0	0	0
096f911c3b198f8abf1001f06307306b	0	0	0	0	0	0	0	0	0	0	0	13	0	90	54	0	22	0	0	0	0	0	0	20	0	574	212	3	0	7	0	0	0	0	0	0	0	0	0	0
aded069d37bba5c36c84e3eb8af959db	0	0	0	0	0	0	0	0	0	0	0	0	0	0	0	0	0	0	1815	0	0	0	195	16	0	0	0	0	0	0	0	0	4	0	0	0	0	0	0	0
fd496fd32dc8c08ade2e8b6c9d8ee13d	342	237	326	291	309	240	0	0	0	0	0	0	0	0	0	0	0	0	0	0	0	0	0	0	0	0	0	0	0	0	0	0	395	416	274	554	336	358	204	233
923f521b9cf313f1f95c9367e09bbc1c	285	364	289	468	323	274	0	0	0	0	0	0	0	0	0	0	0	0	0	0	0	0	0	0	0	0	0	0	0	0	0	0	365	429	306	317	340	385	161	345
55953807fb8bdef709e62f48b0dbb0e6	0	0	0	0	0	0	0	0	0	0	0	0	0	0	43	0	0	0	0	0	0	0	0	0	0	0	0	0	0	0	3108	0	0	0	0	0	0	0	0	0
17e3b0c68a0c50a547dd9db57d609a89	0	0	0	0	0	0	0	0	0	0	0	0	0	67	0	0	0	0	0	0	0	0	0	0	0	871	0	0	0	0	0	0	0	0	0	0	0	0	0	0
820f6693f569e339f183638cd73a7fe6	460	324	306	437	495	223	0	0	0	0	0	0	0	0	0	0	0	0	0	0	0	2	0	0	0	0	2	0	0	0	0	0	401	512	427	325	350	254	248	295
acd07c6a53e9685d44560fd7dd60321e	0	0	0	0	6	0	17	0	7	0	26	6	97	76	389	0	68	0	0	0	0	0	12	23	5	21	22	0	0	20	0	25	25	60	0	211	0	0	0	0
270a745647e1f4f2daefddcae78b43c7	0	0	0	0	0	0	0	0	0	0	0	0	0	0	26	0	0	0	0	0	0	0	0	0	0	623	33	0	0	26	91	8	0	0	0	0	0	0	0	0
32f8fd11d2bee278d609a1d4ab767554	126	52	209	177	218	210	0	0	0	0	0	0	0	0	0	0	0	0	0	0	0	0	0	0	0	0	0	0	0	0	0	0	551	587	269	373	288	281	182	212
06f825b512d903b9230e1a55d87359ee	166	200	348	314	265	267	0	0	0	0	0	0	0	0	0	0	0	0	0	0	0	0	0	0	0	0	6	0	0	0	0	0	450	504	181	165	166	195	203	240
94c62610723c2344b918dfe162390e0d	0	0	0	0	0	0	0	0	0	0	0	0	0	0	21	0	0	0	0	0	0	0	0	0	0	397	371	0	0	0	0	0	0	0	0	0	0	0	0	0
882997bc329839c62a36c8d78f7a4c61	0	0	0	0	0	0	0	0	0	0	0	0	0	0	15	0	0	0	0	0	0	0	0	0	0	1133	0	0	0	62	0	0	16	65	0	0	0	0	0	0
5fe7368c69e66529f0fe71354cc10fc7	0	0	0	0	0	0	0	0	0	0	37	0	18	233	701	0	0	0	0	0	0	0	0	0	0	134	95	0	0	0	0	0	0	139	0	0	0	0	0	0
7edcf5ecdce390629d592a7f513444a8	0	0	0	0	0	0	0	0	0	0	0	0	0	0	0	0	0	0	0	0	65	0	0	0	0	429	334	0	0	0	21	0	0	0	0	0	0	0	0	0
4c672a29773d9e2df4403ba1e0078068	0	0	16	0	0	0	0	0	0	0	0	0	0	0	0	0	0	0	0	0	0	0	0	53	0	0	519	0	0	0	766	0	0	0	0	0	0	0	0	0
a0802e2e9c9ac2458c64dc116dd71469	0	0	0	0	0	0	0	0	0	0	0	0	0	6	0	0	0	0	0	0	0	0	0	0	0	252	298	0	0	0	355	0	0	0	0	0	0	0	0	0
b358d76cf51dad99d526470074e5f31c	0	0	0	0	0	0	0	0	0	0	0	0	0	0	0	0	0	0	0	0	0	0	0	0	0	587	83	0	0	0	579	0	0	0	0	0	0	0	0	0
369273fb9626ae1bbab9e040792c6322	0	0	0	0	0	0	0	0	0	0	0	77	0	0	402	236	89	811	0	0	0	0	0	0	0	0	0	0	0	0	0	0	0	0	0	0	0	0	0	0
7f86fe47ae4b09efb9edc6826f727868	0	0	0	0	0	0	0	0	0	0	0	0	0	0	0	0	0	0	0	0	0	0	0	0	0	0	759	0	0	0	0	0	0	0	0	0	0	0	0	0
36d9f553b6f26520e7a6f8671cdde1f5	0	0	0	0	0	0	0	0	0	0	232	0	69	46	405	8	0	0	0	0	0	0	0	0	0	0	0	0	0	0	12	0	0	0	0	0	0	0	0	0
aa9b3a1418d146c262ec63305292065a	322	225	208	102	191	142	0	0	0	0	0	0	0	0	0	0	0	0	3	0	0	0	0	0	0	0	9	0	0	0	0	0	304	326	102	241	239	167	221	130
edc9e5c16e40aff1eadce6597940f08f	168	105	204	250	218	84	0	0	0	0	0	0	0	0	0	0	0	0	0	0	0	0	0	0	0	0	0	0	0	0	0	0	151	216	226	206	139	216	76	124
22b3c70cdfb1714224e1bf8a6314bee9	162	123	148	223	152	117	0	0	0	0	0	0	0	0	0	0	0	0	0	0	0	0	0	0	0	0	0	0	0	0	0	0	354	333	169	132	180	129	159	163
35ffcc3b809d667286737d79670b8de5	143	116	75	216	78	84	0	6	13	22	0	15	0	25	0	0	0	10	0	3	0	0	0	0	0	0	0	0	0	37	0	0	230	103	94	46	137	103	47	52
27b0bca5c048a9dfade9558dcf685681	0	0	0	0	0	0	0	0	0	0	0	0	0	0	0	0	0	0	0	0	0	0	0	0	0	1389	0	0	0	0	0	0	0	0	0	0	0	0	0	0
7fb08fa9b7b2eef6a3db57d0de769227	197	126	112	201	102	103	0	0	0	0	0	0	0	0	0	0	0	0	0	0	0	0	0	0	0	0	5	0	0	0	0	0	407	253	215	108	140	140	158	120
2f358685eedb3497523c8b9156b6ef71	0	0	0	0	0	0	0	0	0	0	0	0	0	0	22	0	0	0	0	0	0	0	0	0	0	0	0	0	0	0	1751	0	0	0	0	0	0	0	0	0
a1449b1be756f1d781c8085dc619700c	76	145	88	170	199	33	0	0	0	0	0	0	0	0	0	0	0	0	0	0	0	0	0	0	0	0	0	0	0	0	0	0	265	207	89	107	169	0	109	94
9088608f5912be9148f34e398660879b	176	102	85	45	153	40	0	0	0	0	0	0	0	0	0	0	0	0	0	0	0	0	0	0	0	0	0	0	0	0	0	0	139	186	104	108	121	146	124	117
394eda29c886632f514dd94b58381186	34	85	82	193	148	45	0	0	0	0	0	0	0	0	0	0	0	0	0	0	0	0	0	0	0	0	6	0	0	0	0	0	110	117	118	110	152	76	106	124
df8456a1abbfb4c8a2c450b44378d4cb	0	28	30	94	0	106	0	0	0	0	0	0	0	0	0	0	0	0	0	0	0	0	0	0	0	0	0	0	0	0	0	0	132	236	73	102	116	175	103	26
4f5efd25dacb5d639316e7291ff6ff8b	0	239	112	142	59	73	0	0	0	0	0	0	0	0	0	0	0	0	0	0	0	0	0	0	0	0	0	0	0	0	0	0	162	181	105	87	121	133	42	17
7d78ed99b08bd1723065fdd795d17e9c	111	89	146	147	0	82	0	0	0	0	0	0	0	0	0	0	0	0	0	0	0	0	8	0	0	0	0	0	0	0	0	0	106	136	85	114	139	86	60	0
8e80ec2ce7273253b1e98358d64aef04	15	23	132	60	0	14	0	0	0	0	0	0	0	0	0	0	0	0	0	0	0	0	0	0	0	0	0	0	0	0	0	0	95	261	44	75	54	79	90	80
94565b5811e87e6ee34968edf5a63ceb	28	100	31	36	0	33	0	0	0	0	0	0	0	0	0	0	0	0	0	0	0	0	0	0	0	0	0	0	0	0	0	0	0	119	106	101	93	41	137	84
691771d80023bb9a4f419ae9bc8892cd	0	0	0	0	0	0	0	0	0	0	0	0	0	0	0	0	23	0	577	113	17	0	0	0	0	0	0	0	0	0	0	0	0	0	0	0	0	0	0	0
17ae20a577370dc92154c6b1f5b2a5aa	96	48	8	99	123	44	0	0	0	0	0	0	0	0	0	0	0	0	0	0	0	0	0	0	0	0	0	0	0	0	0	0	45	78	26	74	101	84	39	37
b7b4ecb07e1719860260746a5443092a	22	21	30	0	75	66	0	0	0	0	0	0	0	0	0	0	0	0	0	0	0	0	0	0	0	0	0	0	0	0	0	0	94	41	39	0	83	126	100	59
ee02e9f6761a25155c0b1e00753f0fa2	0	0	0	0	0	0	0	0	0	0	0	0	0	0	0	0	0	0	757	0	18	4	0	0	8	0	0	0	0	0	0	0	0	0	0	0	0	0	0	0
7d0d1128850e28ffeb3067dabecee9ba	0	0	0	0	0	0	0	0	0	0	0	0	0	0	0	0	0	0	220	690	0	0	0	0	0	0	0	0	0	0	0	0	0	0	0	0	0	0	0	0

## Sheet: Jejunum_ASV>0.1%
SampleID	102	106	114	118	122	126	130	138	14	142	150	154	166	174	190	194	198	206	210	214	222	226	230	234	238	242	250	254	258	26	262	266	270	274	282	286	290	298	30	302	306	318	322	330	334	338	34	346	350
95fdd816723ca482a5caba10bea171c8	20536	540	123	25930	10696	1211	22281	3577	11475	17784	14965	21111	14226	30165	1674	24001	11989	15833	17811	4052	26253	27011	21265	6950	8881	18593	5463	26638	8527	16844	6098	20516	13718	34917	2340	18805	15778	37367	3642	26511	1052	33021	4281	3763	22539	18046	21520	28284	6623
72e530a4206f2e4804d502f4dfca8387	340	1548	97	1825	782	444	1141	505	11	372	566	404	1199	11395	8124	28	23	1367	19	1099	0	30	305	742	1818	15	46	7601	149	7	256	19	994	5434	284	1568	6253	3197	804	2992	102	4498	12	806	4	6337	3549	61	1212
f434bb1f62e53ad7aed6f6ffd2ec039c	3983	118	0	5298	1967	220	4487	703	2245	3676	2889	3975	2656	5900	315	4747	2528	3110	3414	821	5362	5716	4234	1387	1937	3217	1076	5181	1562	3398	1214	4346	2758	7206	416	3826	3260	7342	665	5028	212	6663	790	688	4540	3376	4205	5644	1389
707740d13076516032127f753473cfc3	0	9	0	20	0	0	57	0	0	10	59	16	13	55	993	0	0	0	0	75	0	25	348	82	0	30	8	56	0	0	0	43	25	0	0	0	46	5	40	0	61	30	48	0	11	47	0	89	16
7b28c20e72c6c95b3e604f0849245770	0	0	0	0	0	0	0	0	0	0	0	0	121	0	0	11	0	0	0	32	0	0	0	0	0	0	0	0	0	0	0	27	147	23	0	22	0	186	0	0	2	60	0	231	0	14	0	73	125
83675d30639c20d61e9f59c2b956ee5b	0	0	8	10	7	28	0	0	0	0	11	0	0	18	659	0	0	4	0	0	0	0	204	0	0	0	0	0	0	0	0	0	0	8	0	0	0	0	0	0	13	36	0	0	0	13	0	55	0
15029a53d91a033bae30c1ad032ad804	62	0	0	0	38	126	0	0	0	0	0	16	19	47	379	0	0	13	0	40	0	0	59	0	0	0	0	0	0	0	0	30	0	0	0	0	33	0	0	94	38	0	0	0	0	14	0	40	0
b8455681fc92d051fdd023aa62417fb3	0	0	0	0	0	10	0	0	0	22	76	8	0	0	106	0	0	0	0	17	0	0	0	0	35	0	0	35	0	105	0	59	18	0	24	8	137	0	0	0	0	0	60	0	0	12	0	0	0
6b8307a0222360f36caf7065c78ff424	0	0	0	0	10	0	0	0	0	11	17	4	0	72	230	0	0	76	0	55	0	3	40	0	0	0	0	0	0	0	3	55	0	5	0	21	53	0	0	0	0	29	0	0	0	5	0	0	11
6c921e3ae0af506f54295d074ca071bc	71	102	0	17	0	30	199	0	0	70	664	0	15	960	30	0	0	58	0	0	0	15	121	0	16	0	0	0	0	0	0	39	0	0	9	0	0	0	7	0	0	36	0	0	0	0	96	0	0
9c6688b479e664fa9d070647653e49ed	0	0	0	10	26	0	0	0	0	16	310	24	0	100	200	0	0	0	0	0	0	0	36	0	0	0	0	0	0	0	8	0	7	0	0	10	6	0	0	0	0	6	5	0	0	16	0	24	0
0a3cf58d4ca062c13d42c9db4ebcbc53	759	0	0	20	0	0	0	3	58	0	96	0	22	0	0	146	32	0	35	103	1643	354	458	218	14	512	276	413	377	44	114	2564	366	283	161	476	4048	407	181	307	265	298	186	173	1006	416	107	993	0
b18037a224663cf99b188ff37ab195d4	0	0	0	36	101	0	205	195	0	78	293	175	50	2748	77	0	60	776	24	8	0	0	6	8	0	0	0	201	0	0	0	0	0	179	0	11	98	89	32	56	0	150	0	14	0	1265	87	0	435
e3055f1b3a2ef5ffe239567f02e0e758	0	0	0	84	0	5	258	6	20	45	806	0	0	0	0	357	340	93	828	35	86	828	1874	539	154	1576	548	1257	742	55	196	2674	1829	165	1423	1380	2124	29	0	172	62	386	497	20	454	7	49	1562	6
5f1f6453ad88dc836876671d27f97f58	22	150	0	31	0	23	79	0	6	13	170	67	45	1100	0	0	0	11	0	0	0	0	8	0	0	0	0	0	0	50	0	0	0	0	0	0	5	0	0	0	0	0	3	0	0	0	117	0	11
65d43491988bfe557da4d86a5ba25dae	634	336	282	190	247	355	13	0	36	0	139	0	0	0	18	1635	0	80	0	42	77	1563	576	0	340	553	0	841	427	15	0	1943	557	0	253	270	2101	0	0	93	0	378	219	16	268	880	37	212	0
b03d2e5ac94c7a0d115e5c542e9315e8	1253	1222	1076	335	1085	1095	0	0	0	0	7	0	0	0	0	0	0	0	0	0	0	0	4	0	0	0	0	0	0	0	0	0	0	0	0	0	0	0	0	0	0	0	0	0	0	0	0	0	0
9afd42dd378444442546f48115a951ec	0	0	0	14	0	39	43	17	0	30	0	0	8	85	86	0	0	21	0	0	0	0	0	0	0	11	0	0	133	0	4	120	0	0	17	47	186	0	0	20	41	0	27	11	0	0	0	9	0
f4c7676e8043df7074244706adb77375	0	0	0	0	0	0	103	12	0	64	113	142	0	26	107	0	14	149	0	4	0	0	16	0	0	0	0	26	0	0	0	11	5	8	0	0	34	12	0	27	9	26	5	3	0	87	18	14	108
37f004671c936285c26471120596b2f5	0	0	0	0	0	0	0	0	0	0	0	0	0	0	0	0	0	0	0	0	0	0	0	0	0	0	0	0	0	0	0	0	0	0	0	0	0	0	0	0	8103	0	0	0	0	0	0	0	0
e7dd01d01c0203abc3708549d99e4e9c	223	0	0	0	0	0	0	0	0	0	0	0	4	0	0	1060	7595	62	2263	11	120	130	101	414	205	485	776	150	524	0	168	568	1141	71	0	297	2075	71	8	33	14	455	0	11	0	21	0	163	0
1b23e74fb43b2b8a2d20b91679cf8e0e	257	0	63	9	69	95	10	3	0	6	59	0	19	0	0	0	447	0	39	125	34	7	342	53	57	80	0	396	8	0	2	84	0	0	6	13	70	16	0	395	13	13	17	2	265	0	0	42	0
c0d5395792eadbf5f62e8ffb14fa0262	289	0	7	0	0	0	0	0	8	0	72	0	0	0	0	0	0	0	134	250	1141	343	646	59	65	174	149	165	0	0	0	227	88	75	37	115	1952	302	151	0	53	87	49	78	169	116	58	494	0
5be31cfb3ad61e104009ab6fb46f6d7b	0	0	0	0	0	0	0	0	0	0	0	0	0	0	0	0	13	0	7	0	0	0	0	17	0	0	0	210	0	0	0	0	0	413	0	0	114	119	0	121	3	93	0	19	4	841	0	0	7
b44aff2995f396f00ad579d8e6684335	0	0	0	0	0	0	0	0	0	0	0	0	41	0	0	36	12	0	0	36	0	0	6	10	0	0	0	223	0	0	0	0	9	459	0	0	95	0	0	93	0	106	0	23	0	773	0	0	14
2ef1e51ab1cf99a3c6417b05a060830e	0	0	0	0	0	0	0	0	0	0	0	0	0	0	0	0	5936	0	0	1330	0	0	0	2557	0	0	0	0	0	0	0	0	0	0	0	0	0	0	0	0	0	0	0	162	53	0	0	0	0
ec6665f4d7bda38bfb9ebcac845d2067	646	615	590	113	518	510	0	0	0	0	0	0	0	0	0	0	0	0	0	0	0	0	0	0	0	0	0	0	0	0	0	0	0	0	0	0	0	0	0	0	0	0	0	0	0	0	0	0	0
8135beec331a8d558070c38b580e4b8e	13	14	54	0	50	0	0	0	0	0	0	0	6	423	505	10	7	158	0	55	0	0	12	19	0	6	2	0	25	2	0	0	0	41	9	103	81	0	0	58	4	26	0	0	0	24	0	4	24
1b9ab7ba8573cbfe5f1a9f59f0b38ff4	77	14	0	0	135	7	474	52	6	5	146	18	0	587	10	0	11	41	0	0	0	0	0	0	0	0	0	282	36	0	0	0	0	23	0	64	42	55	0	72	0	33	0	15	0	426	53	0	65
2f8ad4365632e4a05d8897ac4ee70b3a	0	0	0	0	0	0	0	0	0	0	0	0	0	0	0	0	3711	0	0	829	0	0	0	1642	0	0	0	0	0	0	0	0	0	0	0	0	0	0	0	0	0	0	0	110	0	0	0	0	0
aded069d37bba5c36c84e3eb8af959db	0	0	0	0	0	0	0	0	0	0	0	0	0	13	0	0	193	0	0	193	0	2474	10	0	2854	14	533	85	0	0	0	0	1085	65	0	1455	310	39	0	0	0	0	0	0	0	0	0	0	0
fd496fd32dc8c08ade2e8b6c9d8ee13d	497	292	359	90	240	188	0	0	0	0	0	0	0	0	0	0	0	0	0	0	0	0	0	0	0	0	0	0	0	0	0	0	0	0	0	0	0	0	0	0	0	0	0	0	0	0	0	0	0
923f521b9cf313f1f95c9367e09bbc1c	236	380	341	96	258	265	0	0	0	0	0	0	0	0	0	0	0	0	0	0	0	0	0	0	0	0	0	0	0	0	0	0	0	0	0	0	0	0	0	0	0	0	0	0	0	0	0	0	0
820f6693f569e339f183638cd73a7fe6	325	469	292	27	309	242	0	0	0	0	0	0	0	0	0	0	0	0	0	0	0	0	0	0	0	0	0	0	0	0	0	0	0	0	0	0	0	0	0	0	0	0	0	0	0	0	0	0	0
acd07c6a53e9685d44560fd7dd60321e	55	40	5	18	184	4	203	10	9	7	242	52	0	551	0	9	60	45	0	21	0	0	0	0	0	0	0	145	8	3	0	0	0	29	0	61	19	25	0	14	0	19	0	0	0	184	20	0	30
9908fffab7ed4f3bec44cda2f5084d49	98	0	0	0	0	0	0	9	0	0	0	0	0	0	0	558	143	4	10	0	41	269	255	0	49	43	0	140	0	0	108	586	0	0	93	0	243	0	0	0	0	460	23	0	124	83	0	246	0
7911816f5e81f650f769aba0d5c708cb	121	0	0	0	7	12	0	0	0	0	16	0	0	0	0	0	0	0	15	21	268	22	130	0	0	0	0	64	0	0	0	18	0	0	0	0	592	47	26	0	0	0	0	0	0	38	0	115	0
32f8fd11d2bee278d609a1d4ab767554	259	196	340	121	165	175	0	0	0	0	0	0	0	0	0	0	0	0	0	0	0	0	0	0	0	0	0	0	0	0	0	0	0	0	0	0	0	0	0	0	0	0	0	0	0	0	0	0	0
06f825b512d903b9230e1a55d87359ee	291	335	295	50	265	248	0	0	0	0	0	0	0	0	0	0	0	0	0	0	0	0	0	0	0	0	0	0	0	0	0	11	0	0	0	0	0	0	0	0	0	0	0	0	0	0	0	0	0
d46e2205f0c6ecf67b51f83d111c509c	0	0	0	0	0	0	0	0	0	0	0	0	0	0	0	837	29	0	0	0	29	131	0	0	12	0	0	0	1591	0	0	0	0	0	16	0	0	0	0	0	0	0	0	0	71	47	0	0	0
5fe7368c69e66529f0fe71354cc10fc7	0	0	0	19	0	0	0	0	6	0	71	44	8	94	0	0	52	0	11	0	0	0	0	0	3	0	0	26	0	0	0	0	0	0	0	0	0	0	0	0	0	0	0	0	0	0	15	0	0
bb7e5c6df18c100b97f890fc35eb2911	7	0	0	3	0	0	3	0	0	0	5	0	0	0	0	0	0	0	48	0	0	51	279	225	8	968	328	284	0	5	199	197	254	0	0	0	0	0	2	0	2	545	0	0	0	0	0	180	0
369273fb9626ae1bbab9e040792c6322	0	0	0	0	0	0	0	0	0	0	0	0	0	0	0	0	1987	0	0	446	0	0	0	849	0	0	0	0	0	0	0	0	0	0	0	0	0	0	0	0	0	0	0	0	0	0	0	0	0
aa9b3a1418d146c262ec63305292065a	151	240	191	0	175	157	0	0	0	0	0	0	0	0	0	0	0	0	0	0	0	0	0	0	0	0	0	0	0	0	0	0	0	0	0	0	0	0	0	0	0	0	0	0	0	0	0	0	0
edc9e5c16e40aff1eadce6597940f08f	157	284	152	69	141	107	0	0	0	0	0	0	0	0	0	0	0	0	0	0	0	0	0	0	0	0	0	0	0	0	0	0	0	0	0	0	0	0	0	0	0	0	0	0	0	0	0	0	0
22b3c70cdfb1714224e1bf8a6314bee9	107	133	380	28	193	147	0	0	0	0	0	0	0	0	0	0	0	0	0	0	0	0	0	0	0	0	0	0	0	0	0	0	0	0	0	0	0	0	0	0	0	0	0	0	0	0	0	0	0
35ffcc3b809d667286737d79670b8de5	241	167	75	23	99	126	0	0	0	0	0	0	0	0	0	0	0	7	0	0	0	7	24	0	32	0	0	0	11	0	0	0	0	0	3	0	0	0	0	0	0	0	0	0	0	0	0	0	0
7fb08fa9b7b2eef6a3db57d0de769227	180	125	102	88	129	163	0	0	0	0	0	0	0	0	0	0	0	0	0	0	0	0	0	0	0	0	0	0	0	0	0	0	0	0	0	0	0	0	0	0	0	0	0	0	0	0	0	0	0
a1449b1be756f1d781c8085dc619700c	159	90	214	52	54	62	0	0	0	0	0	0	0	0	0	0	0	0	0	0	0	0	0	0	0	0	0	0	0	0	0	0	0	0	0	0	0	0	0	0	0	0	0	0	0	0	0	0	0
7b9c8d4a1896d84d92ab4820edd025a6	0	0	0	0	0	0	0	23	0	0	0	0	0	133	0	0	350	0	0	0	0	0	126	212	131	0	354	0	0	21	0	0	0	0	80	423	0	0	0	0	0	0	0	0	610	0	0	369	0
f6f69e97b0f65d2947332e0cea8faa75	0	0	0	0	0	0	0	0	0	0	0	0	0	0	0	330	0	0	0	0	0	252	0	0	0	59	0	169	0	0	0	313	55	0	0	0	350	0	0	0	0	0	0	0	0	204	0	0	0
d817c1c9b1a55b6af451568e6e5fa39e	0	0	0	0	0	0	0	0	4	0	0	0	0	0	0	21	0	0	0	0	79	187	52	0	0	79	58	205	0	5	0	74	134	0	0	281	0	0	0	0	0	175	0	0	0	0	17	0	0
[truncated: 20 more columns]

## Sheet: Ileum_ASV>0.1%
SampleID	103	107	11	111	115	119	123	127	131	135	139	143	147	15	151	155	159	163	167	171	175	179	183	187	19	191	195	199	203	207	211	215	223	227	23	231	235	239	247	251	255	259	263	267	27	271	275	283	287
95fdd816723ca482a5caba10bea171c8	4715	533	2674	8248	2104	8414	528	987	14964	9666	21597	16594	8349	6430	24510	21538	5691	32012	23647	17700	24228	888	27350	16841	25330	35409	21210	788	9334	8473	9280	9281	390	17157	11723	7023	957	3384	17890	8768	2478	904	8620	32169	15897	9457	28706	11491	18152
72e530a4206f2e4804d502f4dfca8387	27	3903	0	1014	2101	446	627	88	341	146	2780	1119	923	53	370	2056	964	2433	5029	1206	9489	2597	10153	3037	16	1191	123	3157	3545	3822	0	264	6235	1217	4	42	596	433	701	121	5616	273	814	13	0	2814	10863	1851	1932
f434bb1f62e53ad7aed6f6ffd2ec039c	1015	48	550	1516	453	1632	45	212	2709	1946	4365	3194	1660	1283	4449	4381	1038	6184	4540	3420	4843	159	5536	3316	5090	7386	4413	145	1878	1705	1857	1853	0	3356	2222	1309	189	718	3596	1761	498	173	1806	6228	2744	2050	5793	2122	3793
707740d13076516032127f753473cfc3	0	0	0	125	0	42	0	0	38	0	46	15	276	0	44	43	1620	22	43	0	75	2625	171	19	0	50	63	1835	27	0	0	38	3826	241	0	65	1924	2086	62	30	137	0	12	30	0	57	0	57	44
7b28c20e72c6c95b3e604f0849245770	0	0	0	0	0	0	0	0	0	0	0	0	0	0	0	0	0	0	555	3	0	0	3580	0	0	5	0	475	16	0	0	25	0	0	0	51	9	0	0	0	0	142	0	0	0	11	102	0	224
83675d30639c20d61e9f59c2b956ee5b	0	13	334	0	34	0	11	0	0	0	0	0	64	0	26	0	885	8	0	0	33	833	10	0	0	66	12	0	0	0	0	0	1954	0	0	7	280	179	62	0	0	15	0	0	0	0	20	0	0
15029a53d91a033bae30c1ad032ad804	0	0	0	0	0	0	0	0	0	0	0	0	68	8	0	0	909	0	0	0	49	34	127	0	79	337	29	68	0	0	0	27	22	0	0	0	663	281	0	0	0	0	0	26	0	0	0	7	0
e4ef1c7b616eb842c0ff7a327e83bd76	0	0	3	5	0	0	0	0	0	0	0	3	0	0	4	0	10	3	0	0	0	425	17	0	0	0	12	1403	0	0	0	0	1590	0	0	12	31	120	62	0	2	50	0	0	0	0	0	0	0
b8455681fc92d051fdd023aa62417fb3	0	0	0	232	0	0	0	0	0	0	5	32	26	0	0	0	820	0	11	63	20	569	63	120	0	223	87	566	0	0	0	0	0	0	0	0	0	723	0	0	833	0	18	4	77	30	0	45	29
9d88acce7b2f13b58bf95d2f17ec8c2f	0	0	0	9	0	0	0	0	0	0	0	0	0	0	0	0	33	0	0	0	0	468	22	0	0	0	0	356	0	0	0	0	1163	0	0	10	36	117	72	0	0	25	0	0	0	0	0	0	0
bf34422106e5974ddf75216e2c05273c	0	4	13	24	0	0	0	0	7	4	0	6	36	0	0	0	344	8	0	0	110	556	122	7	14	66	12	910	0	0	0	6	1973	44	0	16	346	376	163	0	0	7	0	0	0	0	10	10	0
6b8307a0222360f36caf7065c78ff424	0	5	3	0	0	0	0	0	0	0	16	21	7	0	21	0	133	0	0	0	124	0	4	22	0	15	17	197	0	125	0	6	1866	0	0	0	0	826	16	0	0	29	5	11	0	0	20	28	12
1c4f71b06ad9d613e117b633de27a107	0	0	5	22	0	0	9	0	0	0	0	0	0	0	0	0	44	0	0	0	8	304	12	0	0	0	0	517	4	4	0	0	1028	0	0	0	47	108	46	3	0	30	0	0	0	0	0	0	0
6c921e3ae0af506f54295d074ca071bc	0	104	66	0	0	11	25	8	175	0	0	173	619	0	193	0	0	59	74	36	1782	251	594	121	8	174	13	444	0	65	0	0	508	113	0	9	0	77	59	0	0	0	0	0	0	0	0	33	0
8da18b476b64f6f053647455b6890f80	0	0	9	18	0	0	15	0	0	0	0	15	32	0	14	12	101	5	0	5	38	171	60	0	0	19	17	557	8	0	0	0	638	0	0	0	382	99	108	0	0	49	0	0	4	7	9	0	0
9c6688b479e664fa9d070647653e49ed	0	0	115	0	0	0	71	0	0	6	15	20	293	0	192	44	857	0	0	0	102	448	137	13	23	119	18	189	0	0	0	0	18	19	0	0	618	202	0	0	0	0	0	0	0	19	0	0	0
9e3b0ce9bb690b78f97f20c102089c55	0	0	12	19	0	0	3	0	0	0	0	0	417	0	14	0	263	0	0	0	27	60	8	0	0	66	0	159	10	0	0	0	414	0	0	8	697	14	226	7	7	24	0	0	0	0	0	27	0
0a3cf58d4ca062c13d42c9db4ebcbc53	71	9	68	98	0	14	0	10	0	0	16	0	8	0	35	0	0	300	30	144	0	0	368	49	87	0	0	0	611	0	0	168	0	0	206	29	0	0	0	6	35	0	186	485	15	87	0	1675	0
208a08b90e13b04d2ef2f584535a2d39	0	0	74	113	0	0	2	0	0	0	0	0	71	0	0	0	144	0	0	0	0	109	0	6	0	0	0	359	12	0	0	4	381	0	0	4	208	189	61	0	0	23	0	0	0	0	0	0	50
9b4036adb487adfe4ca484346b5b9a7b	3	0	0	76	60	0	0	0	8	0	13	21	183	0	0	0	0	0	0	53	0	0	34	0	0	364	0	0	0	0	0	0	161	0	9	0	675	122	20	0	0	0	0	0	0	0	0	51	0
cdb79eecfa38ac58e99bfdef45fabfce	0	26	9	40	9	0	31	0	12	0	0	27	441	0	0	0	636	15	100	106	92	760	792	0	0	53	124	228	0	0	0	12	486	0	0	47	747	75	0	0	7	0	0	0	0	0	0	65	0
b18037a224663cf99b188ff37ab195d4	0	0	0	0	0	6	0	0	78	37	1199	106	47	0	200	88	52	346	160	335	3277	17	3282	164	41	370	9	54	130	498	0	0	161	74	0	0	29	22	37	0	157	0	0	0	0	0	845	0	48
3ee3085cd6f25c2449332df3675b9eee	0	0	53	0	0	0	0	0	0	0	0	0	33	0	0	0	6	0	0	0	0	0	0	0	0	9	0	113	0	0	0	6	87	0	0	6	138	149	0	0	17	56	0	0	0	0	0	0	24
e3055f1b3a2ef5ffe239567f02e0e758	0	0	9	298	0	0	0	0	129	0	9	36	0	5	517	0	0	0	0	11	39	0	46	0	73	0	667	51	84	19	950	179	0	365	299	956	77	67	50	379	74	52	163	1472	64	848	0	1729	28
5f1f6453ad88dc836876671d27f97f58	0	83	30	19	0	5	0	3	39	0	113	44	28	19	50	31	148	0	67	459	1923	0	1218	146	12	12	19	69	0	0	0	0	85	0	0	0	101	25	13	0	0	3	16	0	51	0	13	0	0
65d43491988bfe557da4d86a5ba25dae	495	173	0	658	372	259	373	293	7	0	0	0	0	0	158	0	0	0	0	158	0	0	0	12	0	92	2384	0	91	0	0	163	0	578	179	199	0	68	0	0	154	111	0	836	15	300	0	420	0
b03d2e5ac94c7a0d115e5c542e9315e8	1339	825	0	1132	1581	1274	1204	1376	0	0	0	0	0	0	0	0	0	0	0	0	0	0	0	0	0	0	0	0	0	0	0	0	0	0	0	0	0	0	0	0	0	0	0	0	0	0	0	0	0
476a27c3796dfc1790e181f789663a33	0	0	469	0	0	0	0	0	0	0	0	0	0	0	0	0	3821	0	0	0	0	0	0	0	0	115	0	79	18	0	0	28	0	0	0	0	0	31	24	0	0	7	0	0	0	0	0	0	0
b65410081c87ed629211d7fb136ec45f	0	0	17	26	0	0	31	0	0	0	0	0	0	0	35	0	29	0	0	3	41	20	0	4	0	9	0	15	0	0	0	0	568	29	0	9	63	151	0	0	0	0	0	0	0	0	0	0	0
c62891b6878257f53d1cac38aeb54fe8	0	14	20	134	6	0	26	4	0	0	32	30	78	0	0	0	339	0	0	0	248	306	0	0	0	164	0	77	0	0	0	0	62	8	0	6	11	179	98	0	31	0	0	0	0	4	0	0	20
9afd42dd378444442546f48115a951ec	0	12	0	26	6	6	0	0	29	0	65	73	44	0	0	0	138	26	33	0	130	357	97	6	0	0	0	287	0	47	0	0	1260	0	0	0	0	248	0	0	7	16	11	34	0	0	0	180	8
44617e596cc9489738060db649cd3673	0	0	7	0	0	0	9	0	0	0	0	0	34	0	0	0	142	0	0	0	0	13	15	0	10	195	0	0	6	0	0	0	50	26	0	21	594	0	253	0	0	0	0	0	0	37	295	4	0
958d78a02bef69a795806f97adb117ea	0	0	0	16	0	0	0	0	5	0	10	10	11	0	15	0	169	0	0	0	34	259	92	0	0	9	12	497	0	0	0	0	495	0	0	0	148	165	22	0	0	7	0	6	0	0	7	0	0
4ae33466f29277f3cba0834c894ee4a4	0	20	0	0	21	0	12	0	0	0	0	0	191	0	0	0	191	0	0	0	51	213	0	0	38	0	13	0	0	0	0	0	390	0	0	0	445	0	0	0	0	10	0	0	0	0	85	0	0
c220411c349b8a75624ff17ef6fd3923	0	16	71	0	4	0	0	0	18	0	0	0	7	0	6	0	659	0	20	0	214	0	46	7	0	0	0	29	0	0	0	0	0	0	0	0	10	4	0	0	0	0	0	0	0	6	0	0	0
d611e03044e800bf023cfc92bec2106a	0	0	0	0	0	0	0	0	0	0	0	0	3	0	0	0	27	0	0	0	0	320	9	0	0	0	0	875	0	17	0	0	958	0	0	0	51	114	128	0	0	62	0	0	0	0	0	0	0
37a7e187d35366eb6167cbe90e558af1	0	0	330	37	0	0	0	0	0	0	0	0	0	0	4	0	0	0	112	3	31	420	1513	0	0	413	15	0	0	0	0	0	0	0	0	0	0	0	0	0	0	0	0	0	0	0	57	0	0
ecb3759e804e8c86d9fb0de817207fe9	0	0	8	0	0	0	0	0	0	0	0	0	15	0	9	0	201	0	0	0	0	89	50	0	0	0	0	683	28	0	0	0	417	27	0	0	441	196	76	0	0	0	0	0	2	0	0	0	0
41968913d9ca2d9dfd73c99f7947bb01	0	10	48	0	0	0	0	0	7	0	28	8	34	0	5	0	317	10	10	0	161	181	48	0	0	75	22	144	0	0	0	0	443	17	0	0	189	144	0	0	0	0	0	0	0	33	8	8	0
f4c7676e8043df7074244706adb77375	0	0	0	0	0	0	9	0	83	7	203	205	0	0	39	59	44	19	22	7	70	80	259	0	0	257	0	181	0	100	4	6	422	68	0	0	505	165	73	0	116	0	0	0	0	27	44	5	0
11401ee29264e6f60b65371a2601cd07	0	0	0	0	0	0	0	0	0	0	0	0	0	0	0	0	32	0	0	0	6	291	11	0	0	24	0	195	13	0	0	5	528	0	0	0	30	38	9	0	0	43	0	0	0	0	18	0	12
37f004671c936285c26471120596b2f5	0	0	0	0	0	0	0	0	0	0	0	0	0	0	0	0	0	0	0	0	0	0	0	0	0	0	0	0	0	0	0	0	0	0	0	0	0	0	0	0	0	0	0	0	0	0	0	0	0
e3811dd729c742150d8c1c5f6e40c5a9	0	0	0	0	0	0	0	0	0	0	0	0	0	0	0	0	0	0	0	0	0	402	0	0	0	0	0	625	0	10	0	0	1582	0	0	8	100	157	131	0	0	36	0	0	0	4	6	0	23
54dcb911e3ab04e9d5b30c3912100b41	0	0	0	22	0	0	0	31	7	0	14	0	0	16	56	0	33	0	0	28	63	0	0	0	0	0	0	75	0	0	0	0	111	0	0	0	87	51	0	0	231	0	0	0	0	0	0	0	0
c5aad5ebe154556c8422b669638c0745	0	0	0	0	6	0	0	0	8	0	0	0	0	0	8	0	26	0	0	0	41	139	18	20	0	81	0	887	0	0	0	0	1110	0	0	13	0	107	0	0	0	0	0	0	0	0	0	0	0
f3e9d78daeea42d345080748e31ae3dd	0	0	32	0	0	0	0	0	0	0	4	7	15	0	10	0	78	10	0	0	0	308	67	0	0	0	0	432	6	0	0	0	568	59	0	0	208	64	67	0	0	21	0	0	0	0	11	0	0
e7dd01d01c0203abc3708549d99e4e9c	68	0	7	0	0	0	0	9	0	0	0	0	0	0	0	0	0	63	14	0	0	0	29	0	0	50	1597	591	25	0	3776	52	4	204	27	0	69	76	123	867	0	0	87	1005	0	420	0	44	0
3dfaa3fabdf04711351c97af550d2921	0	0	0	0	0	0	0	0	0	0	0	0	0	0	0	0	10	0	6	0	0	0	20	0	0	0	0	0	0	6	0	0	205	0	0	0	0	99	0	0	0	28	0	0	0	0	0	0	6
1b23e74fb43b2b8a2d20b91679cf8e0e	152	19	0	92	66	129	79	142	0	0	13	20	0	0	0	0	0	0	0	13	0	0	134	11	0	4	0	194	177	0	63	14	0	0	0	91	43	10	0	0	38	0	36	36	0	0	0	14	0
c3ff4c29778c6c86865687a4061a3382	0	0	0	0	0	0	0	0	0	2	4	0	98	0	20	0	403	0	38	0	0	0	76	9	0	0	20	40	0	0	0	0	2098	76	0	0	536	805	0	0	0	0	0	0	0	0	0	0	0
af140e3881d1c74ce8b17a5c8979dfa5	0	84	22	6	0	0	0	0	51	0	41	41	21	4	16	0	32	0	33	60	251	120	787	36	18	0	11	0	0	0	0	0	14	0	0	0	59	8	0	0	5	37	0	0	33	0	32	4	3
e91c619cb40c81228289adf178ee2b99	0	0	49	0	28	0	11	0	0	0	0	0	0	0	0	0	0	0	0	0	0	0	0	0	0	0	0	0	0	0	0	22	0	0	0	16	0	0	818	0	0	72	0	0	0	6	0	0	26
5284495840f983847ec0d0b741a9a471	0	0	77	36	0	0	0	26	0	0	0	0	0	0	37	0	22	0	0	18	0	176	81	0	0	0	0	32	0	0	0	0	755	0	0	0	1136	0	11	0	51	0	0	0	0	0	0	66	0
c0d5395792eadbf5f62e8ffb14fa0262	20	0	33	0	0	6	0	15	0	0	0	0	26	0	0	8	0	240	154	0	0	0	128	0	73	0	0	0	5278	44	0	298	9	0	146	17	0	868	0	26	0	0	34	0	32	0	0	864	0
d4b8175c2cc6c6722d5d45082d4fd64d	0	0	11	17	0	0	0	0	0	0	0	0	0	0	0	0	0	0	0	0	14	431	15	0	0	26	0	0	0	0	0	0	1053	0	0	0	372	0	0	0	0	0	0	0	0	0	0	27	0
5be31cfb3ad61e104009ab6fb46f6d7b	0	0	0	0	0	0	0	0	0	0	0	0	0	0	0	0	0	0	293	106	0	0	2323	165	0	0	0	266	118	0	0	0	0	0	0	0	48	0	0	0	144	0	0	0	0	23	1236	0	17
eadf136b3be32021ccc7859e14c84f07	0	0	0	0	0	0	0	0	0	0	0	0	0	0	0	0	0	0	0	0	0	0	57	0	0	0	0	0	0	0	0	0	0	0	0	0	0	0	0	0	0	0	0	0	0	0	0	0	0
881827d013845a8d4e929224f9fd24e1	0	0	0	0	0	0	0	0	0	0	0	0	150	0	0	0	259	0	0	0	37	0	0	0	0	0	11	0	0	0	0	0	508	23	0	0	640	0	0	0	0	0	0	0	0	0	0	0	0
3cec387e3e89982bf989b857f7c296d1	0	0	0	0	0	0	0	0	0	0	0	8	0	0	0	0	53	0	0	0	31	434	0	17	0	53	0	432	0	29	0	0	76	5	0	0	10	723	0	0	0	0	0	0	0	0	0	0	0
b44aff2995f396f00ad579d8e6684335	0	0	0	0	0	0	0	0	0	0	0	0	0	0	0	0	0	0	269	0	0	0	2096	143	0	0	13	204	124	0	0	6	0	0	0	0	47	0	0	0	136	0	0	0	0	0	1011	0	0
2ef1e51ab1cf99a3c6417b05a060830e	0	0	0	0	0	0	0	0	0	0	0	0	0	0	0	0	0	0	0	4366	0	0	909	49	0	0	0	719	631	0	0	300	0	0	0	0	2106	0	0	0	0	0	0	0	0	0	6	0	0
ec6665f4d7bda38bfb9ebcac845d2067	898	486	0	725	1005	736	767	885	0	0	0	0	0	0	0	0	0	0	0	0	0	0	0	0	0	0	0	0	0	0	0	0	0	0	0	0	0	0	0	0	0	0	0	0	0	0	0	0	0
227262067d4e6d71cd179bc7f7a5d1c4	0	0	106	0	0	0	12	0	0	0	0	0	0	0	11	0	13	0	0	105	0	0	68	0	21	0	11	0	0	0	0	0	0	0	0	0	306	10	0	0	29	0	0	0	0	21	42	0	0
8c65d91e013525d1c8606fab40e0a88b	0	0	0	0	12	0	0	8	0	0	20	0	16	0	0	0	55	0	0	0	0	0	23	0	0	63	5	33	0	0	0	0	64	0	0	0	655	142	57	0	264	7	32	0	0	0	20	24	30
8135beec331a8d558070c38b580e4b8e	171	13	0	0	0	45	17	36	0	0	0	0	0	0	0	0	0	32	49	0	536	290	478	109	0	441	29	170	50	120	0	24	198	0	0	0	33	53	15	2	0	8	0	0	0	0	47	19	41
b7e5e417da183df1d5cb33a51a10991d	0	0	0	8	0	0	0	0	0	0	0	0	0	0	0	0	0	0	0	0	0	116	4	0	0	0	0	1059	0	19	0	0	771	0	0	0	47	13	113	0	0	28	0	0	0	0	0	0	0
df1e3080300aed496c300246714bd838	0	0	0	0	0	0	0	29	0	0	0	0	0	0	28	31	139	0	0	0	119	0	235	0	0	411	0	0	0	0	0	0	0	0	0	0	370	172	0	0	0	0	0	0	0	0	0	0	0
49542b70535b5b25483a9220abd05093	0	53	0	0	0	0	0	0	11	0	10	65	7	0	0	17	45	0	27	38	318	36	211	50	0	12	0	42	0	0	0	0	128	0	0	0	10	17	0	0	0	0	0	0	0	0	0	0	0
725f3336cd7e92e814c5f299fc4bfddb	0	0	7	0	11	0	16	0	0	0	5	0	58	0	7	0	281	0	0	0	19	203	71	0	0	12	0	14	0	0	0	0	268	0	0	16	0	422	27	0	0	0	0	0	0	0	0	0	0
ef3a40c4f26b5019887d73ceaaab84f2	0	0	0	0	0	0	0	6	0	0	0	0	243	0	0	0	0	0	0	0	0	98	0	0	0	43	0	0	0	0	0	0	0	0	0	0	227	0	0	0	165	0	0	10	0	0	0	0	0
11a5f0316ff4f3edb52c1b583a6e1448	0	10	0	0	0	0	0	0	0	0	0	0	23	0	0	0	36	0	0	0	311	169	0	32	0	0	0	0	0	48	0	0	1746	213	0	8	0	40	28	0	0	0	0	0	0	0	0	0	0
4d887dbbcf25a86825b7ea380b9c395b	0	0	0	0	36	0	0	0	0	24	0	0	184	0	0	0	520	0	0	0	0	0	0	0	0	53	0	0	0	0	0	0	181	0	0	0	54	16	58	0	0	0	0	0	0	67	0	0	0
54e0174aa8565daf971f0e40d489b6c0	0	0	0	0	17	0	0	0	0	0	0	0	0	0	0	0	208	0	0	6	0	15	0	0	25	0	0	0	0	0	0	5	0	0	0	0	0	107	30	0	0	433	0	0	0	29	19	0	10
3b0ad10d8b65188ed821ad66f710b506	0	0	19	0	0	0	0	0	0	0	0	0	20	0	0	0	0	0	0	0	0	0	0	0	0	0	0	0	3	0	0	0	86	21	0	0	490	222	42	0	238	0	0	0	0	0	0	0	0
d6eda88bd8370a52076b0dafde12249a	0	0	6	0	0	0	9	0	0	0	0	0	0	0	0	0	0	0	0	0	0	199	0	0	0	22	13	55	0	0	0	5	0	42	0	10	815	189	58	0	9	7	0	0	0	0	0	17	0
1b9ab7ba8573cbfe5f1a9f59f0b38ff4	0	14	0	35	31	0	0	0	165	0	380	39	10	5	143	31	4	127	19	144	925	0	609	15	0	32	0	26	75	63	0	0	26	0	0	0	0	0	0	0	118	37	0	0	0	0	142	76	0
81f59f6a76c8682de1719c97b5b24173	0	0	0	6	0	0	0	0	0	0	0	0	112	0	14	0	42	3	10	0	34	49	90	0	0	24	6	116	0	0	3	0	221	12	0	0	278	185	132	0	18	0	0	0	0	0	0	0	0
2f8ad4365632e4a05d8897ac4ee70b3a	0	0	0	0	0	0	0	0	0	0	0	0	0	0	0	0	0	0	0	3018	0	0	605	0	0	0	0	413	445	0	0	173	0	0	0	0	1435	0	0	0	0	0	0	0	0	0	0	0	0
6c5f4f9666d82b1bedf94e99acfe6741	0	0	0	0	0	0	0	0	0	0	0	0	0	0	0	0	0	0	0	0	0	0	0	0	0	0	0	0	0	0	0	0	0	0	0	0	0	0	0	13898	0	0	0	0	0	0	0	0	0
aded069d37bba5c36c84e3eb8af959db	0	0	0	0	0	0	0	0	0	0	0	0	0	0	0	0	0	0	0	0	0	0	0	0	0	0	0	0	239	0	0	106	0	0	0	0	56	2298	0	35	0	115	7	0	0	244	0	0	0
1ca6c232223e11140a64765c71b31445	0	0	0	0	0	0	0	0	0	3	9	0	63	0	0	0	7	0	0	0	0	115	0	0	0	0	0	1017	0	0	0	0	337	79	0	0	1149	77	439	0	60	0	3	0	0	0	0	0	0
fd496fd32dc8c08ade2e8b6c9d8ee13d	314	213	0	317	517	473	208	282	0	0	15	0	0	0	0	0	0	0	0	0	0	0	0	0	0	0	0	0	0	0	0	0	0	0	0	0	0	0	0	0	0	21	0	8	0	0	0	0	0
923f521b9cf313f1f95c9367e09bbc1c	232	279	0	201	632	591	368	219	0	0	0	0	0	0	0	0	0	0	0	0	0	0	0	0	0	0	0	0	0	0	0	0	0	0	0	0	0	0	0	0	0	0	2	0	0	0	0	0	35
fa01fa9371329c1526148b038d8d4b5b	0	0	0	0	0	0	0	0	0	0	0	0	0	0	0	0	0	0	0	0	0	0	0	0	0	0	0	0	0	0	0	0	0	0	0	0	0	0	0	0	0	18	0	0	0	89	0	8	0
820f6693f569e339f183638cd73a7fe6	330	187	0	393	333	387	304	419	0	0	0	0	0	0	0	0	0	0	0	0	0	0	0	0	0	0	0	0	0	0	0	0	0	0	0	0	0	0	0	0	0	0	0	0	0	0	0	0	0
538add871396bc31fee52b4c6e73542a	0	0	0	0	0	0	13	0	0	0	0	0	95	0	89	0	52	0	18	0	0	18	132	0	28	1053	0	0	0	37	0	0	0	0	0	0	1420	0	0	0	0	175	0	0	0	142	104	23	0
acd07c6a53e9685d44560fd7dd60321e	0	37	0	30	6	0	0	14	77	19	161	25	10	0	233	26	16	79	30	69	658	0	438	24	0	106	12	11	79	85	5	0	15	116	0	0	6	0	6	0	38	10	0	0	0	21	65	15	8
9908fffab7ed4f3bec44cda2f5084d49	116	0	0	0	0	0	0	0	0	0	4	0	0	0	5	0	0	0	0	0	0	0	0	0	0	10	1062	17	0	0	0	131	0	46	18	39	0	28	23	0	6	0	6	1622	0	0	0	16	0
32f8fd11d2bee278d609a1d4ab767554	345	187	0	351	356	408	346	368	0	0	0	0	0	0	0	0	0	0	0	0	0	0	0	0	0	0	0	0	0	0	0	0	0	0	0	0	0	0	0	0	0	0	0	0	0	0	0	0	0
06f825b512d903b9230e1a55d87359ee	380	163	0	220	291	298	247	272	0	0	0	0	0	0	0	0	0	0	0	0	0	0	0	0	0	0	0	0	0	0	0	0	0	0	0	0	0	0	0	0	0	0	0	0	0	0	0	0	0
94c62610723c2344b918dfe162390e0d	0	0	0	0	0	0	0	0	0	0	0	0	0	0	0	0	73	0	0	0	0	0	24	0	0	6	0	0	7	0	0	0	0	0	0	0	237	0	7	0	0	19	0	0	0	0	0	0	0
c67805e12dc927c5b3ba6b192381ecf7	0	0	0	0	10	0	0	0	0	0	21	0	0	0	0	0	323	0	0	30	0	0	190	0	0	0	12	150	28	0	0	0	58	0	0	0	1111	106	0	0	5	0	0	0	0	0	28	32	0
5fe7368c69e66529f0fe71354cc10fc7	0	0	0	0	0	15	0	0	6	0	0	0	36	0	21	13	46	14	52	64	181	0	711	0	0	0	0	91	0	0	0	0	22	0	0	0	0	122	0	0	0	0	0	0	0	0	0	0	0
0dd0551c0dd279c12d8a31ad016f0a7b	0	0	0	0	0	0	0	0	29	0	0	0	0	0	0	0	0	0	0	0	0	0	190	0	0	0	0	0	0	0	0	0	0	0	7	0	0	0	0	0	0	0	0	0	0	0	0	0	0
bb7e5c6df18c100b97f890fc35eb2911	8	0	0	26	0	0	0	0	0	0	0	0	0	0	33	0	0	0	0	0	0	0	0	0	0	0	0	6	0	0	110	154	0	0	0	474	17	17	0	48	27	6	23	263	5	72	0	0	0
369273fb9626ae1bbab9e040792c6322	0	0	0	0	0	0	0	0	0	0	0	0	0	0	0	0	0	0	0	1519	0	0	328	0	0	0	0	272	182	0	0	111	0	0	0	0	693	0	0	0	0	0	0	0	0	0	0	0	0
36d9f553b6f26520e7a6f8671cdde1f5	0	0	0	0	0	0	0	0	0	0	55	42	0	0	18	9	0	77	63	6	380	0	914	98	0	0	0	107	78	604	13	0	0	0	0	0	55	0	5	0	0	0	0	0	0	0	0	0	0
702e821793e8ad73e60a49ee91165118	0	0	0	0	0	0	0	0	0	0	0	0	0	0	0	0	0	0	7	0	0	0	0	0	0	0	0	0	0	0	0	0	0	0	0	0	0	0	0	4903	0	0	0	0	0	0	0	0	6
4e0a65b0a2fab7bf0f307d360b679d87	0	0	0	7	0	0	0	0	0	0	0	0	0	0	0	0	0	0	0	0	0	9	90	0	0	290	0	0	0	22	0	17	0	0	0	40	766	0	0	0	0	115	0	0	0	0	0	0	0
f2cb3c654f5b42e4032f57d378a2b725	0	0	0	0	0	0	0	0	0	0	0	0	0	0	0	0	0	0	0	0	0	0	0	0	0	31	0	0	0	0	0	0	0	5	0	0	0	8	0	3848	0	7	0	0	0	0	0	0	0
[truncated: 41 more columns]

## Sheet: Caecum_ASV>0.1%
SampleID	100	104	108	112	116	12	120	124	128	132	136	140	144	152	16	160	164	168	172	176	180	184	188	192	196	20	200	204	208	212	216	220	224	228	232	236	24	240	244	248	252	256	260	264	268	272	276	28	280
95fdd816723ca482a5caba10bea171c8	1806	3638	1561	3711	1726	1659	2137	3074	3667	4456	2850	5066	8066	3305	1622	1041	2642	2279	4344	3252	2345	1642	1575	4073	1504	2165	1048	474	434	418	291	252	12095	336	215	524	1299	495	553	682	453	450	179	1253	604	1182	3338	1074	482
72e530a4206f2e4804d502f4dfca8387	5548	6842	12615	11345	11588	10	12287	7793	6503	4555	10368	6846	8756	10118	646	5794	6522	9688	9795	7227	9967	9409	8660	21898	8133	1123	7641	3649	3476	5420	4760	5296	7	4547	2408	6790	9	6412	6798	5295	5443	5283	3024	6159	3899	7264	4582	9	5995
f434bb1f62e53ad7aed6f6ffd2ec039c	344	739	268	776	386	362	428	604	750	879	525	1065	1670	613	343	225	513	416	881	589	455	308	316	850	293	459	223	0	80	37	0	33	2550	44	0	0	257	0	53	140	0	0	0	214	48	204	629	192	0
707740d13076516032127f753473cfc3	0	0	2754	6104	2857	192	4959	372	362	3008	3332	2087	3731	3374	908	2103	3359	4769	1761	2024	4428	570	2946	3523	961	1259	3672	2643	1347	1499	1774	2683	14	2668	1521	5672	2429	3586	5680	3291	3002	6627	630	3545	5978	3819	2018	1118	5343
7b28c20e72c6c95b3e604f0849245770	0	5	0	4	10	0	0	0	0	0	0	0	0	44	0	0	2	5074	7	0	5	157	0	0	1617	0	2314	544	5	9694	2099	5467	0	0	5089	198	0	4	0	0	0	3	9258	0	0	3848	207	0	8009
83675d30639c20d61e9f59c2b956ee5b	163	726	1317	0	2336	4440	3237	2027	926	1081	722	38	768	1235	497	1793	306	131	689	1681	916	388	621	3659	712	738	0	247	1001	1066	367	549	8	1550	193	1277	0	447	1334	2740	393	0	502	376	0	1488	2624	303	386
15029a53d91a033bae30c1ad032ad804	0	844	1147	0	2106	0	257	1088	3056	501	1062	480	326	61	827	1288	317	2973	0	1098	87	2711	1696	2601	0	1197	103	362	447	258	1256	277	0	364	0	2521	544	631	4801	146	0	0	0	507	0	1247	1374	269	102
e4ef1c7b616eb842c0ff7a327e83bd76	701	728	1387	701	1252	43	743	904	1841	581	1165	369	674	560	93	91	944	1034	45	1135	1231	974	1072	1773	1120	145	2132	460	1050	809	250	1462	0	2500	1600	638	697	1755	827	2999	1146	1219	1200	980	724	697	343	51	1769
b8455681fc92d051fdd023aa62417fb3	212	731	303	7740	275	23	70	76	447	397	849	3987	1801	1658	134	388	2665	1293	3228	624	1206	1515	3973	570	28	0	613	308	60	0	127	1220	8	23	57	0	0	2285	23	0	7	2842	15	2362	0	952	0	1282	0
9d88acce7b2f13b58bf95d2f17ec8c2f	37	334	1383	1164	528	56	190	580	495	260	677	354	587	405	23	432	693	1212	34	984	1770	1208	1092	497	775	102	978	892	518	1385	727	1090	0	1686	1104	1232	272	2233	384	1723	924	949	882	177	1106	1552	1117	0	1513
bf34422106e5974ddf75216e2c05273c	461	424	585	462	326	90	115	226	1771	492	2326	788	598	251	56	769	1276	588	306	871	992	624	422	947	1206	91	1272	216	147	1341	1224	1549	0	960	1379	1029	144	3732	1175	2584	80	1250	353	1163	1045	344	418	28	769
6b8307a0222360f36caf7065c78ff424	0	128	540	0	322	68	0	819	0	0	683	191	579	705	8	397	166	71	0	921	0	0	893	928	1649	0	413	597	920	210	864	528	0	396	278	0	0	4102	10	1023	920	333	652	2287	0	7	1197	17	0
1c4f71b06ad9d613e117b633de27a107	317	371	1097	993	1308	57	358	544	1199	981	537	379	514	472	28	438	1279	951	193	641	927	1358	1306	2314	900	123	1173	417	438	828	402	588	0	985	930	672	368	1612	1647	955	510	1350	620	709	749	1093	404	66	927
6c921e3ae0af506f54295d074ca071bc	2119	4052	725	96	471	776	569	1926	1013	655	0	0	1742	2201	0	0	2075	599	215	1825	892	0	1856	939	653	125	504	0	168	0	0	105	0	855	163	0	681	181	1583	181	0	0	0	781	1681	0	0	0	0
8da18b476b64f6f053647455b6890f80	255	875	605	998	741	135	919	1478	1399	486	1042	594	370	827	446	260	687	628	458	498	468	372	479	964	963	280	733	503	799	586	137	763	0	614	580	974	379	977	1125	1737	816	680	1276	660	732	570	548	304	1355
9c6688b479e664fa9d070647653e49ed	442	46	140	613	0	239	607	772	282	306	1803	397	254	3988	69	459	27	113	407	1055	1047	1463	998	688	235	219	228	387	282	95	422	110	0	149	222	492	619	484	84	114	217	551	17	374	552	981	0	0	288
9e3b0ce9bb690b78f97f20c102089c55	738	765	279	688	205	281	208	380	527	181	285	300	218	534	150	495	639	211	724	349	169	779	323	695	528	111	149	489	137	119	472	366	0	216	179	757	159	35	97	304	240	130	147	1120	1113	469	567	132	780
0a3cf58d4ca062c13d42c9db4ebcbc53	0	6	0	0	0	0	0	0	0	0	0	0	0	0	0	0	0	0	0	0	0	0	0	0	0	0	0	0	0	0	0	0	2197	0	0	0	0	0	0	0	0	0	0	0	0	0	0	0	0
208a08b90e13b04d2ef2f584535a2d39	146	61	286	260	931	0	93	68	738	352	561	725	150	369	121	99	1006	104	686	664	323	294	193	1943	70	215	236	432	147	443	119	744	0	803	1760	273	194	1648	441	1917	381	431	1712	796	284	447	339	218	902
9b4036adb487adfe4ca484346b5b9a7b	207	608	0	2276	1164	0	173	594	552	738	249	465	337	132	66	34	165	0	867	368	129	518	191	949	0	315	0	0	0	0	0	0	0	0	35	615	2248	390	0	390	450	424	0	435	697	116	292	471	164
cdb79eecfa38ac58e99bfdef45fabfce	957	1344	1289	696	555	0	69	814	173	1122	363	207	402	283	15	347	971	2262	1442	596	1859	1402	600	416	869	50	132	753	289	272	847	122	0	0	366	356	0	182	477	0	240	68	91	130	412	43	82	437	769
b18037a224663cf99b188ff37ab195d4	0	29	10	134	7	0	149	193	0	78	270	363	457	521	39	159	374	295	514	369	392	540	555	499	420	143	225	283	262	135	206	146	0	111	78	421	0	420	242	162	211	319	47	316	204	328	231	0	225
3ee3085cd6f25c2449332df3675b9eee	402	779	295	0	299	796	400	108	658	24	51	87	306	121	13	0	0	0	358	113	0	535	436	865	676	19	295	911	96	51	518	226	0	0	468	1320	0	283	1083	13	387	884	1451	143	842	520	846	11	1339
5f1f6453ad88dc836876671d27f97f58	544	1215	471	398	414	246	631	598	633	164	584	400	164	886	218	479	566	291	1419	811	92	897	793	123	211	335	120	276	56	144	46	178	0	68	28	366	102	270	14	249	322	171	18	316	56	113	111	283	15
476a27c3796dfc1790e181f789663a33	0	1614	0	0	383	1630	6452	0	524	18	0	0	123	32	0	2328	0	0	0	0	0	0	0	736	0	1164	72	4470	0	0	2185	0	0	0	0	0	0	70	0	142	27	0	32	589	0	693	21	986	0
b65410081c87ed629211d7fb136ec45f	561	911	333	331	82	499	438	714	105	110	90	7	37	578	317	71	535	52	831	568	167	209	335	834	389	805	52	604	245	325	377	122	0	582	0	659	0	677	661	332	500	225	416	642	0	1158	504	155	498
c62891b6878257f53d1cac38aeb54fe8	1504	237	528	1533	1207	183	2362	1181	1862	252	1470	1137	900	1476	519	299	397	14	500	869	800	0	0	1340	170	140	94	140	75	15	92	125	0	226	231	5	424	296	11	322	112	183	86	19	0	1378	60	450	19
9afd42dd378444442546f48115a951ec	0	778	199	1381	1062	0	257	0	1500	413	0	415	852	0	49	283	518	81	44	475	918	493	497	383	0	0	982	65	452	344	0	464	0	0	18	0	71	1459	1808	677	227	1294	821	1072	228	0	0	0	761
44617e596cc9489738060db649cd3673	114	43	218	0	75	0	202	204	0	65	0	0	0	153	0	189	40	106	27	0	40	0	161	1172	525	33	0	173	366	625	177	528	0	802	1700	127	0	0	0	1011	648	0	0	0	0	802	1160	0	0
958d78a02bef69a795806f97adb117ea	595	640	543	1026	295	136	487	412	630	383	367	348	286	620	318	388	546	589	471	536	649	654	250	253	772	265	520	594	243	221	196	464	0	346	226	538	388	984	525	460	187	462	358	828	991	510	272	140	390
4ae33466f29277f3cba0834c894ee4a4	0	644	1506	0	883	0	378	2041	0	212	0	0	30	0	0	188	1133	64	119	649	645	0	0	32	746	949	0	901	100	313	0	20	0	278	153	570	0	0	0	111	1563	0	757	0	0	0	2713	253	0
c220411c349b8a75624ff17ef6fd3923	641	1135	582	85	508	584	96	972	2248	416	1829	0	132	249	55	1063	243	315	188	578	0	180	74	90	444	408	44	0	5	41	0	63	0	0	65	48	0	48	48	32	0	43	11	0	574	736	67	455	334
d611e03044e800bf023cfc92bec2106a	99	0	0	292	0	0	0	0	0	0	175	43	49	48	0	196	622	706	0	298	495	611	638	1383	1272	0	1064	559	414	1243	592	1471	0	1189	1725	507	0	1540	1182	1585	518	753	1248	606	598	713	310	0	1055
37a7e187d35366eb6167cbe90e558af1	2432	3423	352	1497	317	2636	0	0	0	387	0	0	0	761	0	0	0	2665	816	0	639	18	0	3236	480	0	0	0	0	0	0	0	0	0	0	0	0	0	0	193	0	0	0	0	0	0	716	0	0
ecb3759e804e8c86d9fb0de817207fe9	289	685	553	863	149	72	729	287	892	48	340	203	275	220	17	542	511	551	705	406	233	480	199	666	0	135	616	497	261	388	206	568	4	1148	664	1087	98	1528	779	1296	115	686	0	327	585	33	251	286	1443
41968913d9ca2d9dfd73c99f7947bb01	366	893	645	16	327	529	492	1379	1125	237	545	676	454	503	58	259	949	367	31	679	666	331	439	920	600	50	271	30	288	142	16	65	6	234	255	243	164	656	232	284	308	225	61	404	0	486	74	257	866
f4c7676e8043df7074244706adb77375	95	66	4	0	0	31	53	262	0	113	332	251	455	242	0	90	322	119	43	12	273	73	0	858	422	9	205	246	185	153	226	235	0	194	264	267	0	419	395	377	75	557	16	516	465	531	211	0	502
11401ee29264e6f60b65371a2601cd07	149	0	513	0	472	0	341	428	0	292	0	164	348	896	0	274	497	565	0	477	730	612	565	942	648	0	498	282	252	484	293	506	0	351	516	445	0	624	472	448	442	530	402	571	0	384	582	0	567
e3811dd729c742150d8c1c5f6e40c5a9	0	0	0	0	0	0	0	0	0	0	0	35	0	0	0	0	116	584	0	322	1031	174	163	1284	2607	0	1085	819	807	486	348	1307	0	1661	1793	927	0	1726	0	2094	1090	0	754	0	0	463	342	0	657
54dcb911e3ab04e9d5b30c3912100b41	65	238	99	872	72	0	0	0	1811	216	1393	510	454	1120	1248	0	320	0	1007	581	0	183	102	77	80	0	100	0	369	80	21	613	0	0	81	82	615	146	42	0	0	2607	37	533	0	46	106	385	1484
c5aad5ebe154556c8422b669638c0745	107	146	245	120	548	61	144	192	1067	480	518	200	175	280	260	77	397	69	169	419	197	229	612	945	308	118	799	284	535	263	369	269	0	136	1823	199	238	1714	463	225	1427	369	789	424	542	252	0	87	874
f3e9d78daeea42d345080748e31ae3dd	405	354	382	436	440	115	307	359	420	126	557	335	352	352	182	186	523	397	241	190	469	349	249	854	462	148	411	398	157	312	338	635	0	448	665	337	271	366	504	766	136	518	390	256	360	628	283	103	374
3dfaa3fabdf04711351c97af550d2921	1068	1641	71	0	0	0	0	2582	255	0	20	0	0	192	0	0	0	384	0	119	0	147	248	36	2165	112	0	0	1497	0	18	0	0	0	1130	17	0	134	0	9	0	0	1459	0	11	1334	112	0	0
1b23e74fb43b2b8a2d20b91679cf8e0e	0	0	0	0	12	0	0	0	15	0	0	0	7	0	0	0	0	3	0	0	0	4	27	0	0	0	791	49	11	0	19	49	24	0	27	64	0	0	38	60	0	53	0	10	21	0	0	0	13
c3ff4c29778c6c86865687a4061a3382	472	371	45	43	63	0	875	133	202	106	1827	915	34	628	0	312	0	818	682	61	0	64	1115	68	107	44	34	10	46	75	0	1402	0	42	46	221	37	1907	8	4	772	19	8	1973	0	367	90	22	8
af140e3881d1c74ce8b17a5c8979dfa5	305	648	599	1138	320	247	307	188	842	362	368	298	202	797	270	102	90	396	395	167	540	450	673	168	31	313	4	295	0	20	59	57	0	40	87	254	719	85	451	13	287	197	463	193	536	203	408	364	121
e91c619cb40c81228289adf178ee2b99	0	250	36	0	234	23	418	336	15	0	7	0	0	0	140	0	0	0	187	166	0	10	61	25	96	0	0	0	105	0	229	0	0	0	112	0	0	0	0	352	308	0	428	0	0	870	521	0	0
5284495840f983847ec0d0b741a9a471	1017	692	29	1523	406	186	0	220	778	167	613	140	103	941	261	32	446	341	599	92	476	1336	0	0	0	228	10	153	472	156	0	360	0	0	32	574	904	0	220	136	21	884	0	283	554	35	0	209	0
c0d5395792eadbf5f62e8ffb14fa0262	0	15	0	0	0	41	9	14	51	0	0	0	0	0	0	0	0	0	0	0	15	18	48	0	0	0	0	0	0	0	0	20	848	0	0	0	9	0	0	0	0	0	0	4	9	0	0	7	0
d4b8175c2cc6c6722d5d45082d4fd64d	0	1835	0	632	25	173	0	0	0	1165	0	0	0	2015	76	0	462	362	369	634	1290	120	232	46	0	0	0	0	722	448	0	0	0	0	45	273	0	0	114	0	872	0	0	0	0	0	853	0	0
5be31cfb3ad61e104009ab6fb46f6d7b	0	0	0	0	0	0	0	0	0	0	0	0	0	0	0	0	0	1010	806	0	0	633	509	0	699	0	633	373	0	465	648	813	0	0	1226	682	0	0	843	0	0	527	113	262	157	484	378	0	98
e578c77e8b6e9a64a2a3c6ef754a355d	366	205	601	0	217	19	0	345	434	319	64	400	198	226	0	192	282	0	467	179	0	327	435	438	556	119	183	380	179	115	19	593	0	417	560	390	0	211	565	771	551	500	538	249	44	318	632	158	292
eadf136b3be32021ccc7859e14c84f07	0	0	0	0	0	0	0	0	0	0	0	0	0	0	0	0	0	0	0	0	0	3263	0	0	0	0	0	0	0	0	0	0	0	0	1499	0	0	0	0	0	0	0	0	0	0	0	0	0	0
924668f542df9de35c2226e4a6cf09bd	0	54	185	2854	112	126	37	52	305	0	1782	231	354	0	72	45	342	458	1310	425	38	411	0	323	125	828	0	0	0	184	76	177	0	268	23	165	1233	32	227	0	0	1182	0	136	352	0	139	193	0
881827d013845a8d4e929224f9fd24e1	0	0	577	0	1330	12	489	0	92	208	15	0	0	144	0	223	1395	0	0	679	0	0	0	0	861	1115	0	0	0	387	0	0	0	318	0	596	0	18	0	0	0	0	0	34	0	0	0	535	0
333bbf9224442fc10cd497377d2b1d01	89	135	602	736	276	36	370	103	306	317	278	169	634	62	55	183	268	323	0	174	687	61	263	1431	616	37	400	132	167	643	176	131	0	528	113	269	165	1045	617	303	415	823	47	239	401	450	217	0	162
8be9dac75adfd36649c004c8b72de91d	162	171	394	802	483	0	217	174	793	261	497	301	200	198	0	125	207	135	0	216	255	162	290	1554	471	105	277	158	183	574	91	361	0	673	353	169	154	396	525	506	269	196	286	194	125	239	108	77	275
e5f421f77127c381ff85107a2d059a54	228	0	20	0	201	41	13	81	163	16	431	47	0	157	0	0	55	33	8	83	509	60	331	124	452	0	176	55	238	98	287	1326	0	35	1136	580	0	366	24	131	776	519	124	237	0	1499	410	0	0
3cec387e3e89982bf989b857f7c296d1	0	41	260	0	28	0	92	96	0	18	119	69	126	184	0	123	86	8	0	204	892	59	262	1659	717	0	1364	165	434	348	182	207	0	271	191	434	0	2497	644	166	1052	296	0	216	1109	662	259	0	52
b44aff2995f396f00ad579d8e6684335	0	0	0	0	0	0	0	0	0	0	0	0	0	0	0	0	0	924	765	0	0	586	416	0	595	0	573	353	0	410	569	752	0	0	1122	698	0	0	696	0	0	508	104	227	138	447	368	0	101
227262067d4e6d71cd179bc7f7a5d1c4	375	0	57	0	191	415	0	332	0	0	0	0	0	438	343	10	207	975	3208	138	0	544	443	152	486	577	0	0	30	0	324	140	0	0	0	120	0	28	56	0	0	109	0	0	0	840	860	0	848
8c65d91e013525d1c8606fab40e0a88b	126	484	210	0	338	136	124	85	584	54	319	542	373	187	26	91	0	64	28	36	17	211	33	168	330	85	26	56	159	0	72	53	0	129	64	722	0	388	676	211	106	390	10	934	221	19	288	281	542
1e238cf69a93a1a2daa7c27cf7f252f1	0	0	0	0	223	0	1150	0	3155	0	1719	136	222	140	0	0	182	0	157	138	0	1110	891	0	0	0	287	0	124	319	0	808	0	166	1066	1444	14	728	4	0	133	460	0	0	160	536	0	0	0
8135beec331a8d558070c38b580e4b8e	0	0	0	0	0	0	0	0	0	0	0	0	4	0	0	0	236	731	0	136	634	425	620	735	721	0	320	295	140	332	225	202	0	145	151	527	0	328	599	647	353	6	164	197	219	232	291	0	190
b7e5e417da183df1d5cb33a51a10991d	46	0	0	115	311	0	17	44	150	0	112	38	35	58	0	65	171	212	0	140	158	110	0	936	1045	5	1461	290	176	1167	409	726	0	820	886	570	0	1033	534	768	369	558	508	211	337	219	72	0	460
df1e3080300aed496c300246714bd838	35	118	0	0	143	0	472	16	1148	283	323	18	105	155	14	60	220	240	282	408	0	681	145	1002	0	26	0	0	0	67	0	0	0	0	0	130	0	371	19	75	0	0	0	54	138	24	30	0	75
466f240b16ae7967d70c0d1c09d52b3d	140	503	6	0	40	25	199	0	266	69	690	492	161	236	54	61	1164	584	458	343	324	738	41	133	58	290	0	24	127	326	7	937	0	386	16	295	118	142	15	768	181	0	0	208	0	0	148	18	0
49542b70535b5b25483a9220abd05093	125	285	219	98	127	38	197	160	240	57	296	94	151	230	0	147	104	126	190	123	120	159	150	323	96	127	119	130	31	0	102	144	0	107	134	131	28	167	175	165	237	107	0	365	281	135	0	59	307
725f3336cd7e92e814c5f299fc4bfddb	336	296	196	22	504	90	36	271	112	147	1015	460	121	238	0	357	427	85	233	42	818	438	481	196	0	136	34	0	625	0	0	527	0	0	491	0	0	939	0	55	0	0	57	943	0	0	72	53	0
ef3a40c4f26b5019887d73ceaaab84f2	0	757	0	699	0	45	142	733	138	207	0	138	175	0	27	0	0	0	585	0	197	227	0	282	0	138	0	0	0	0	0	0	0	0	0	201	677	58	0	141	101	1109	0	154	1776	206	0	174	339
b971daa61a53d9e096214599176b245e	0	0	0	0	0	0	0	26	0	0	45	136	300	0	0	0	225	0	0	31	112	0	208	1142	575	0	91	78	0	227	66	185	0	147	0	0	0	621	518	32	0	31	962	500	0	493	245	0	877
808938559d03ba4c5c3ff7e91845409b	161	222	60	0	90	58	0	361	987	394	0	0	122	339	23	302	0	4	145	266	219	20	271	0	16	0	0	18	49	0	33	0	0	0	0	0	0	113	0	170	15	42	8	1810	0	1321	78	0	0
11a5f0316ff4f3edb52c1b583a6e1448	0	0	500	0	0	0	0	0	0	0	0	15	0	0	59	146	0	0	0	835	351	102	1181	395	371	0	0	140	700	597	0	259	4	451	0	0	0	264	245	566	0	0	0	0	0	41	50	0	0
bbf09d1e74ccbedbd4193d86469bbd67	141	196	0	436	41	13	132	199	653	0	138	364	222	246	0	91	533	386	0	253	383	558	0	814	348	0	451	145	181	275	150	224	0	334	0	170	0	616	184	387	224	525	254	302	268	0	0	0	373
1e040db0048bb4067f6d355cb45648dd	234	825	147	303	18	61	72	113	62	73	83	66	86	140	0	33	117	109	300	58	198	208	502	72	449	117	44	42	23	43	0	232	0	54	28	121	130	116	299	131	582	591	35	243	951	156	634	144	47
4d887dbbcf25a86825b7ea380b9c395b	0	409	258	0	547	0	658	273	34	0	521	0	0	0	218	348	0	49	0	0	0	0	0	354	167	148	0	0	0	0	52	0	0	0	0	0	0	37	0	588	291	0	91	0	15	1001	0	183	0
ee766857ab5fc018ac26632146bc90e1	197	219	210	261	227	103	296	187	349	208	369	147	169	376	100	156	177	187	158	190	215	227	200	189	239	73	215	174	168	361	149	213	0	454	297	334	74	465	300	523	123	363	173	201	146	244	264	40	231
54e0174aa8565daf971f0e40d489b6c0	0	0	0	0	84	0	8	0	426	12	0	0	0	49	0	58	0	0	129	0	23	0	83	0	0	193	0	92	0	0	101	45	0	0	0	0	0	218	0	63	181	0	2238	0	0	571	119	0	0
3b0ad10d8b65188ed821ad66f710b506	225	208	88	10	241	179	0	110	300	67	138	421	95	129	0	0	0	0	0	0	0	177	0	137	259	45	0	46	34	0	26	0	0	148	0	440	7	259	131	202	134	436	0	315	208	37	307	156	604
1fdb09b154f347c35de3aad68774cb79	9	294	201	299	130	117	144	70	167	38	332	0	0	53	132	264	333	220	550	87	0	620	58	0	8	109	0	0	104	0	0	239	0	0	62	44	415	132	311	109	32	104	0	0	0	285	504	163	387
0e15737671741c707e2fc53a6bf0ff68	62	534	262	0	256	114	703	255	959	236	292	472	264	615	519	238	23	0	29	413	40	109	100	654	139	66	21	323	29	123	210	128	0	182	85	538	19	165	24	109	302	28	0	111	0	197	93	9	188
64887d477599cd3dfb5734b05544d746	789	0	0	0	0	141	0	55	0	0	881	0	0	464	0	0	0	0	0	0	92	0	264	423	121	304	0	383	158	0	0	69	0	910	564	1685	0	0	0	0	736	0	0	0	0	268	943	91	136
d9868507ed2f950a7acfcf9ed2b6a95b	0	0	370	0	60	0	0	0	0	0	0	0	0	0	0	0	0	19	0	168	534	260	203	584	164	83	0	111	33	74	69	72	0	138	108	27	0	0	573	129	81	0	330	0	0	89	280	0	331
50c77a7d7927650d7b1a093e9d2c62de	169	29	61	220	164	83	115	155	596	111	311	151	66	281	0	126	98	168	510	340	114	544	532	693	0	113	103	98	393	82	109	194	0	183	73	337	105	245	732	260	20	211	216	245	237	0	251	114	673
d6eda88bd8370a52076b0dafde12249a	145	332	29	0	166	55	0	223	125	0	75	223	130	306	0	14	124	0	0	193	369	83	361	285	535	40	89	303	0	0	237	171	0	333	172	402	0	213	17	130	341	124	165	411	321	311	0	21	0
811f358e4e89eecbd75298ffce878cba	96	535	868	1048	180	58	168	42	80	211	17	178	40	1577	37	686	104	58	99	33	0	77	396	136	89	178	150	0	0	50	0	173	0	0	115	0	701	0	0	0	78	0	128	92	126	89	76	57	0
6aaac37f56d07ffcea4fe9ef1cd00d2f	215	44	47	62	137	84	32	103	47	0	32	103	0	53	101	85	14	0	0	0	0	44	191	31	602	0	85	104	0	56	0	0	0	0	387	115	87	1009	115	78	86	419	1144	757	32	774	361	0	1113
1b9ab7ba8573cbfe5f1a9f59f0b38ff4	60	183	59	96	73	41	141	89	62	95	63	74	68	204	36	26	59	27	147	77	87	61	77	70	52	13	71	59	8	13	19	39	0	11	17	15	22	40	48	127	34	61	29	51	41	53	23	28	27
81f59f6a76c8682de1719c97b5b24173	149	172	192	252	177	47	20	227	208	84	387	79	128	203	95	68	209	191	273	116	137	151	82	137	169	136	108	34	78	177	106	150	0	112	102	119	144	237	37	286	132	102	44	329	77	305	90	50	244
e5d55481f7455ae8a4620451dc7ac39a	27	98	249	272	403	0	39	37	0	57	117	38	39	139	0	48	140	304	0	126	266	175	376	834	373	5	321	174	123	119	102	154	0	249	158	287	0	530	66	222	353	102	222	146	375	321	82	0	119
c7bd1a04839d16e8e0aa5c2846da879b	0	0	0	0	0	0	0	0	0	0	0	0	26	0	0	20	82	42	0	87	163	197	196	46	137	0	307	273	15	90	458	151	0	284	215	842	0	56	245	384	125	339	983	36	593	36	202	0	750
5eaeab6fa2a8efe96eac7a0712c65080	142	80	99	316	131	29	123	45	99	20	101	300	34	156	60	55	139	62	300	234	158	42	56	92	114	236	151	262	84	325	151	247	0	17	77	791	569	93	64	36	68	310	148	371	138	54	80	231	287
6a8118b17d1d40cf877db24449ceb616	77	420	444	248	102	0	284	134	130	58	263	0	120	151	32	45	81	177	123	189	162	0	449	452	120	84	0	10	200	36	31	160	0	304	195	306	462	674	381	613	157	276	344	533	496	240	104	50	373
836cd5ea357ad392c00a7e48d921be1d	64	53	144	110	117	0	63	40	341	53	125	79	62	78	0	69	115	71	0	79	86	90	97	405	515	7	391	104	78	342	224	409	0	372	339	322	28	675	316	441	155	156	130	91	97	125	65	10	252
9ec73948e25785a6eb2aef77bb065569	0	1092	688	0	0	94	0	883	8	312	12	0	0	106	0	0	373	0	1134	1123	0	0	59	34	271	0	0	487	331	94	209	0	0	17	0	329	0	149	0	508	161	263	0	0	0	16	59	596	714
7376eb30d4a59d2e35c4a558fa824a08	92	88	0	175	0	99	228	106	161	65	160	125	0	77	32	244	90	164	47	107	388	97	257	0	127	71	0	1367	0	0	687	0	0	53	743	0	0	0	0	0	533	746	252	0	26	0	0	153	298
bfa3561ca0d31bca54be08e2d9f7937f	61	142	60	182	113	27	196	0	147	55	231	168	87	60	65	191	0	70	78	134	263	176	231	242	122	84	280	0	229	115	25	47	0	60	89	129	77	387	46	235	219	162	389	452	567	126	191	0	332
bf611493002f5918a68778bde2def567	94	152	144	163	370	33	172	149	653	159	73	265	176	147	57	67	289	236	94	198	352	232	258	630	256	31	226	71	101	160	438	109	0	210	119	111	99	448	372	252	157	218	85	149	103	289	104	16	152
273fa0191072af3d33e32271b35c8f18	0	0	59	0	0	0	0	0	0	0	0	0	56	0	0	0	36	0	0	0	208	86	0	457	447	0	0	99	13	38	392	276	0	715	421	412	0	565	1082	163	0	1533	378	0	45	543	226	0	185
e04cb8c96d35fee0e181a15fc4511d0c	164	255	71	263	105	6	159	181	155	84	118	70	161	221	27	134	130	41	553	80	99	347	142	193	150	94	76	185	68	40	70	129	0	82	40	75	35	168	97	52	62	153	51	226	185	88	74	89	233
b301115074f6e3de36efa48b692c7f8b	76	629	87	33	200	99	0	147	0	0	605	186	192	388	51	67	45	113	244	125	131	68	0	46	100	206	0	17	224	34	8	19	0	100	51	53	168	476	98	89	182	513	91	13	531	139	283	33	646
693c980645f0af912893409ceee83c7e	0	0	0	0	12	511	0	0	1340	16	1965	0	0	90	0	888	0	0	0	581	0	0	0	57	0	0	0	0	0	54	63	0	0	483	0	347	0	29	0	294	156	0	0	212	0	2678	0	0	0
f75fd5f7c991c715f44bdf5b6598a5fc	0	92	247	499	383	0	133	45	554	174	323	192	123	127	0	95	60	109	0	0	148	102	202	1026	271	0	199	49	118	370	0	194	0	342	220	102	102	234	339	318	196	124	197	42	70	72	0	0	187
096f911c3b198f8abf1001f06307306b	436	574	376	0	286	183	0	113	0	131	0	13	0	187	530	152	385	190	907	0	301	55	108	51	38	0	0	456	44	142	446	125	0	0	0	180	0	120	0	62	0	0	121	85	0	0	0	61	0
20ac30224f0d6923615fbc03ac84563f	287	608	208	324	208	159	422	108	203	195	298	165	109	295	74	118	198	169	171	232	124	213	127	190	146	90	22	96	121	123	312	136	0	107	116	137	167	277	226	0	99	176	200	215	265	241	141	100	157
d3d5f57b1c8aafeca61afdb1627d2990	75	118	0	30	136	371	188	96	172	109	357	25	0	695	624	40	67	11	219	137	301	280	0	285	85	662	0	0	0	0	10	52	0	12	0	13	277	49	36	366	50	191	61	194	483	986	119	78	61
0f2a5acc53e55f2c9f0c7409421dc5a0	135	237	325	354	260	38	299	312	139	135	315	220	51	75	87	181	88	28	167	93	83	124	199	235	117	43	35	134	0	138	29	281	0	59	57	10	127	90	223	337	33	36	106	336	32	204	32	56	32
1ca6c232223e11140a64765c71b31445	72	128	43	120	48	0	28	44	703	56	632	266	115	114	0	0	0	14	17	302	148	73	79	11	0	97	325	115	0	350	0	380	0	370	7	144	44	121	759	560	0	393	35	376	8	29	0	158	28
1900e8aeb6400849e6294cf82af2180d	207	168	292	271	499	19	113	129	301	172	255	161	73	176	5	87	205	165	0	202	90	204	156	644	453	18	490	132	124	166	184	234	0	159	187	181	9	232	218	232	80	232	75	147	92	249	39	0	149
48120f2d28136884787660eb4953652a	234	198	168	266	168	194	179	285	175	134	214	89	136	188	91	91	101	101	187	156	153	97	118	198	175	53	124	162	83	107	46	130	0	126	91	171	85	134	115	101	47	154	75	103	118	103	75	83	138
1c15cc2e879cebc8e17c951a3be01044	147	0	0	202	222	0	0	125	182	115	404	0	263	193	0	0	0	52	514	0	122	171	201	227	105	0	27	213	73	0	170	42	0	122	84	170	0	199	192	45	188	402	104	124	0	319	83	0	458
5a483930ae687501d239547148452dec	0	89	0	0	0	140	0	0	0	394	0	291	0	145	189	387	236	145	525	0	585	78	1663	0	0	85	102	119	92	73	113	70	0	0	365	103	0	199	0	631	1105	0	145	0	0	2201	238	265	143
e61b52cd3ace83b9a3515c17c6438a87	0	0	0	2604	0	0	0	0	125	133	285	1317	646	0	0	0	0	0	0	210	0	0	0	0	0	0	202	0	0	0	0	0	0	0	0	0	0	787	0	0	0	0	0	959	0	0	0	0	0
55953807fb8bdef709e62f48b0dbb0e6	0	73	10	0	261	0	0	0	0	0	0	0	0	206	640	0	434	1629	0	162	0	0	0	259	0	0	0	0	0	0	0	30	0	0	0	0	0	0	0	0	0	0	0	0	0	0	0	0	0
fa01fa9371329c1526148b038d8d4b5b	0	0	0	0	0	0	23	0	0	0	0	0	0	0	0	0	0	0	0	0	0	0	0	0	0	0	0	233	0	0	0	0	0	0	0	0	0	0	0	0	0	0	622	0	0	2600	0	0	0
17e3b0c68a0c50a547dd9db57d609a89	0	0	0	0	0	0	0	0	0	0	0	295	0	0	0	0	0	0	0	0	786	0	0	60	0	0	0	0	0	0	0	360	0	32	415	2309	0	0	0	25	1060	0	78	0	0	53	0	0	2829
f1b5d72cafaaea7b61c531cb90452d9c	140	106	158	252	115	69	182	96	106	90	140	92	136	121	40	104	130	178	59	128	247	224	206	167	208	54	96	88	67	122	92	168	0	104	122	198	74	199	123	130	138	158	281	143	0	220	208	27	155
959b9a53f413963f0de2b48bc4ceaece	160	33	17	0	31	0	0	9	28	0	86	74	34	57	0	25	237	29	50	264	210	332	10	422	424	31	205	151	301	564	0	406	0	248	0	115	0	463	79	499	136	269	132	82	19	476	148	21	631
ce78414357068359ddae6a47b6592a08	42	115	88	68	110	11	70	52	213	85	249	170	49	157	32	77	188	89	189	192	68	168	73	193	123	57	192	189	51	306	45	801	0	164	247	179	102	523	110	227	100	251	293	43	70	225	94	64	216
270a745647e1f4f2daefddcae78b43c7	18	0	0	441	229	0	249	0	552	10	532	510	218	39	88	219	36	202	281	0	15	393	144	102	0	103	85	0	0	0	9	101	0	22	69	12	108	203	490	0	64	69	0	672	152	0	0	0	259
13506518b825bfbd65794347af5958c6	33	112	0	239	27	41	62	334	20	84	99	40	20	301	0	20	165	136	328	29	24	58	159	124	20	122	0	54	52	61	74	45	5	87	52	45	118	0	32	118	14	8	0	0	292	66	158	93	469
01a2d99629204c9a28d82e0a091fc01a	51	0	728	0	336	0	9	21	443	0	173	27	0	0	87	48	0	0	284	192	56	0	213	624	498	0	102	53	64	0	43	128	0	0	30	56	0	381	0	57	113	0	65	0	0	9	0	0	0
0e064a94474c099cd422c1ef160ab28c	244	562	159	0	110	0	49	239	110	190	602	0	117	431	94	144	0	121	680	179	134	0	216	132	137	46	0	0	0	0	109	0	0	98	0	119	0	0	0	0	0	0	107	158	0	0	36	227	0
185fd5fa18cb1cc8b0fa2bacf60af299	83	60	458	527	150	338	125	41	342	406	54	38	25	133	60	105	68	54	140	37	34	221	217	114	106	48	21	135	60	0	84	103	0	5	42	262	215	114	22	50	145	32	14	103	65	24	29	47	49
60f93fed83d17d00026301844c347826	0	0	183	468	7	0	40	0	87	16	0	0	195	17	20	0	0	0	0	62	343	202	255	152	0	0	907	0	346	185	0	640	0	0	663	428	0	674	0	145	444	416	275	349	0	280	151	0	0
7911816f5e81f650f769aba0d5c708cb	0	0	0	0	0	0	0	0	10	0	0	0	0	0	0	0	0	0	0	0	0	0	12	0	0	0	0	0	0	0	0	0	248	0	0	0	0	0	0	0	0	0	0	0	0	0	3	0	0
f8efe91029e700305a3f38df207a54b5	123	36	217	0	129	0	63	199	0	0	139	135	186	312	135	0	293	0	138	347	145	0	0	809	266	142	0	105	295	171	320	74	0	0	0	0	0	0	0	0	0	0	602	158	449	0	0	0	0
b2de7f61a39f051d643c50d653a6fd07	0	33	9	0	71	20	75	0	47	0	74	4	30	129	27	110	40	177	14	47	158	133	96	793	30	0	158	221	22	0	91	145	0	283	235	169	13	162	158	233	153	8	702	8	85	268	152	5	390
5f95df1f8c13d432d57bcc0ed625e8e6	93	115	91	0	40	18	74	54	245	0	97	68	34	154	0	12	0	30	20	27	0	82	39	436	187	44	7	8	60	84	136	295	0	207	177	129	0	11	277	380	156	27	557	64	0	364	87	0	115
8e6f1849d93723676dff6cb1962941a8	170	75	0	78	33	0	0	0	90	50	0	7	24	25	0	6	140	0	524	0	33	41	7	111	116	7	22	131	92	0	33	85	0	0	234	115	10	15	0	0	5	237	124	233	884	17	264	159	538
94c62610723c2344b918dfe162390e0d	0	44	79	0	0	0	193	149	0	0	0	0	0	0	0	124	0	291	0	0	0	0	0	17	330	0	0	465	0	0	231	0	0	0	5	56	0	0	0	30	356	0	232	0	0	394	0	0	0
882997bc329839c62a36c8d78f7a4c61	1473	220	592	0	0	0	0	467	0	0	0	0	0	0	0	133	0	40	294	0	0	0	131	0	11	80	0	57	0	0	0	0	0	0	0	0	421	0	0	0	0	0	14	0	0	0	0	70	0
4debdb072999105a06ee39aa8779f01c	232	466	167	116	132	45	61	302	116	47	82	0	0	193	0	95	177	27	423	78	0	167	0	306	0	171	68	133	0	82	41	163	0	0	0	141	187	0	0	55	153	88	0	206	117	0	74	61	0
c67805e12dc927c5b3ba6b192381ecf7	0	0	0	0	47	0	0	0	0	0	148	88	0	0	34	317	0	188	345	0	0	386	0	158	238	0	155	527	0	11	119	0	0	0	0	590	0	595	0	0	90	81	144	0	148	74	160	0	525
b12e4aab4d4ca5f14d932ff0e2b7b2c4	158	77	44	0	155	6	74	93	319	106	140	83	42	90	0	72	105	87	24	131	114	96	87	110	139	0	41	228	83	46	0	0	0	170	0	0	0	303	0	84	0	0	268	259	0	0	244	0	112
e791655d0751a7b94c3da722891dbb60	0	348	0	142	0	184	158	160	9	20	84	0	0	275	85	134	0	35	41	0	0	0	0	19	22	0	464	266	0	0	0	0	0	13	0	0	137	0	0	83	25	402	52	293	542	0	102	96	0
5f52cfbaaa24156ce4890b1e49443f86	121	0	143	240	159	0	62	244	139	106	376	203	120	316	67	0	143	23	46	71	0	0	311	42	0	63	13	167	169	58	0	125	0	488	211	89	170	76	0	115	69	259	76	175	0	32	229	91	18
7edcf5ecdce390629d592a7f513444a8	73	86	0	19	42	0	13	70	0	0	129	31	0	0	0	0	0	0	66	0	0	32	103	41	0	0	93	172	0	0	155	62	0	51	111	0	0	87	186	0	0	318	53	492	1070	128	50	0	1590
4c672a29773d9e2df4403ba1e0078068	0	0	448	0	460	0	202	0	0	85	0	0	8	0	0	0	513	0	0	239	0	0	0	0	355	474	0	0	0	140	0	0	0	133	0	266	0	0	0	0	0	0	0	0	0	0	0	179	0
43de67e7f1c2806d834b1bc6b5cd56a9	156	422	204	0	193	108	305	234	454	50	274	182	0	358	0	205	112	190	48	235	0	239	0	260	0	146	0	136	75	33	81	0	0	23	0	171	36	107	0	183	27	100	0	0	0	326	0	93	0
a0802e2e9c9ac2458c64dc116dd71469	80	104	0	0	0	26	0	141	0	42	67	8	80	131	0	0	164	43	37	70	157	130	123	0	70	23	0	77	66	42	117	33	0	0	100	249	11	0	245	43	0	70	0	145	0	121	126	29	319
23194d2b7c5d9dadd6ac2f254c6586d1	0	0	0	0	0	29	0	0	0	0	0	36	87	0	0	0	0	0	0	0	67	0	133	115	539	0	470	571	0	0	213	87	0	0	70	421	0	0	0	0	70	259	128	14	115	155	43	0	124
3abae39e94cf51920aec2b9fb42b53a9	152	228	114	165	181	113	111	170	137	70	111	7	103	231	21	52	92	115	238	94	80	109	140	98	105	63	22	28	33	43	21	99	0	24	32	31	81	153	68	64	62	164	74	68	132	115	105	96	102
5224c8677f31bb2d5eb133e3db1f4785	106	142	107	202	325	12	215	143	537	51	238	419	59	117	35	85	203	49	96	27	0	72	180	193	113	72	0	160	0	53	22	296	0	112	239	208	271	0	103	127	65	0	38	26	0	277	97	66	0
898eb92ef2d1ef893f7d0c383527b44d	145	59	0	40	70	0	180	0	0	0	102	50	82	113	70	13	0	110	57	0	0	973	0	41	173	49	61	136	0	51	186	49	0	0	52	0	60	20	1004	0	52	130	70	0	315	0	93	0	79
acf76b1f22c9536ca982df6f9b0219da	0	0	0	0	0	0	13	0	371	0	560	248	148	0	0	18	0	0	0	0	0	0	0	34	0	0	445	369	0	0	0	0	0	0	50	39	0	163	0	228	298	0	278	410	0	0	0	76	0
1e6cab71d67b661890d73129cc87f8aa	391	0	147	386	301	62	622	314	492	0	356	322	215	365	81	37	44	0	124	183	178	0	0	317	0	0	0	0	0	17	0	0	0	0	0	0	134	0	0	0	0	34	0	0	0	333	0	117	0
2c064ac1dddc6cb98a5ca584a68647f8	565	407	712	13	234	0	118	76	325	130	40	0	60	154	350	42	43	47	196	226	25	138	87	123	534	0	0	45	37	0	91	25	0	0	24	12	21	200	25	0	15	0	0	64	98	34	19	83	23
265db877b8d28ec4be074da88a846ec7	311	313	351	0	72	41	112	9	0	0	6	0	0	20	14	125	0	0	9	0	6	44	50	781	44	76	0	45	91	0	0	75	0	13	41	91	0	0	0	169	239	0	23	0	0	329	91	217	116
b358d76cf51dad99d526470074e5f31c	240	318	296	136	106	0	0	132	0	301	80	0	127	124	0	0	228	181	358	369	480	319	115	0	231	0	0	213	0	0	212	0	0	0	111	92	0	0	113	0	0	0	0	123	53	36	0	0	267
35b8c10c192360a7cdad628a185e99e5	160	318	129	105	145	14	0	176	0	61	57	53	0	152	0	33	43	63	165	125	142	131	0	317	96	234	0	78	0	0	32	94	0	101	121	0	90	57	0	0	37	188	0	152	0	106	183	115	62
d409f0f157c2b27807fbae78d69bcc0d	0	0	0	0	0	0	337	0	1024	0	486	0	146	0	0	0	97	0	111	0	0	689	245	0	0	114	195	0	0	0	0	263	0	100	302	494	0	467	0	0	0	365	0	19	0	143	0	0	0
1841ceeb252a3e471065c84c01175567	25	221	18	131	70	0	149	42	125	60	233	385	166	71	57	0	0	82	45	59	205	101	0	116	58	53	99	0	0	16	0	165	0	52	95	256	178	317	126	42	150	112	141	329	265	87	84	90	135
c7205100c08de2585db74f670a36edf9	0	48	0	0	0	0	0	470	0	63	0	0	0	0	0	0	0	0	636	19	0	0	0	0	0	0	57	0	0	0	0	93	0	40	0	106	0	95	0	0	0	0	44	719	0	0	22	11	150
682dde043b6d08cf20021dc1e423446d	80	43	25	0	74	51	57	68	144	52	107	0	283	188	0	14	30	0	64	21	119	0	169	97	0	19	0	36	46	0	0	0	0	68	0	180	0	31	0	0	0	0	0	74	0	70	0	0	137
b96d2310701b0f232b5fec79a5474a9c	0	0	0	0	102	28	0	183	137	0	173	66	225	0	0	0	45	0	0	0	365	85	9	0	0	261	78	10	0	382	0	0	0	0	0	0	0	0	6	0	0	15	0	12	0	0	0	778	205
5d6d200a9ac1ce63fef95fdd57cd4039	123	367	131	0	0	0	231	214	159	10	0	0	0	128	0	0	0	41	0	0	0	38	64	96	239	83	0	92	83	0	94	0	0	0	0	160	20	0	0	0	0	0	0	0	0	0	114	36	0
e73324a8a0475600c6753f8dd1884617	0	0	0	0	0	0	0	0	0	0	0	0	0	0	0	0	0	0	0	0	0	0	0	0	0	0	0	834	0	0	696	0	0	0	0	0	0	0	0	418	646	0	0	0	0	0	0	0	0
d80a7337f5b24c90a8cc2dd4d9896e61	142	183	0	131	28	31	0	0	18	24	50	78	0	116	7	0	101	0	302	110	14	50	243	64	68	99	166	50	32	200	79	81	0	155	4	0	213	43	0	0	0	48	0	0	0	77	0	30	51
3562d3a0374b9f2ed190c1a7aa7dedb7	48	46	252	462	83	65	136	22	115	108	122	0	0	129	56	74	0	52	191	0	221	86	100	50	63	71	0	79	0	20	0	41	0	57	0	0	104	0	52	17	0	43	0	0	101	0	59	48	85
7f86fe47ae4b09efb9edc6826f727868	0	63	0	0	0	0	61	0	0	0	0	0	0	0	0	0	0	0	0	0	0	0	0	0	0	0	0	0	0	0	0	0	0	0	0	0	0	0	0	0	485	0	0	0	0	0	0	246	3636
ea4510a10f5c6a8339f7a26eaefbad39	0	0	0	0	0	0	0	0	0	0	0	0	0	0	0	0	900	0	898	0	370	0	1255	0	0	0	0	0	0	0	19	378	0	0	0	0	0	0	0	0	0	0	0	0	0	0	0	423	0
10a2fdc6e17ace008fccaa36aa011a14	0	0	0	0	0	0	0	0	0	0	0	0	0	0	0	0	150	76	0	0	63	61	61	393	272	0	265	135	93	334	94	406	0	283	403	143	0	350	287	383	0	195	304	153	66	87	0	0	245
d2e0c58f3e2b97c342c9c190ef1763f7	15	35	126	0	89	0	79	118	59	21	0	0	14	60	33	19	32	0	0	51	0	90	16	283	311	0	0	35	147	15	20	0	0	0	0	0	0	167	18	60	11	0	115	231	0	72	80	0	475
9d24a5958524b572f096d356fd33187c	0	56	0	0	0	12	0	0	121	81	126	158	48	0	38	0	156	0	220	45	0	22	0	92	49	0	32	0	0	0	0	0	0	0	0	0	0	39	127	20	0	0	105	241	144	0	0	82	128
2a89717b521dc276ae1bd08090909dc4	31	27	28	7	37	7	13	292	0	30	40	8	34	183	0	176	116	239	31	209	40	298	250	0	45	75	0	329	6	30	48	219	0	172	72	388	0	341	502	365	0	0	0	49	7	25	0	0	48
c7e785c8e289c83881a0d6d6c5038baa	157	212	0	0	95	0	0	138	145	0	236	43	0	232	0	52	185	181	0	195	183	168	44	82	42	0	0	48	32	0	0	11	0	0	10	113	0	217	0	0	26	214	0	151	352	195	96	0	231
03a1f9f63e2fa6c7bdf27d33eba2b09d	0	0	11	285	122	0	123	0	310	20	1079	174	133	0	0	96	0	99	157	0	0	264	39	0	0	173	0	0	0	0	12	0	0	0	34	10	176	85	265	0	0	0	0	338	25	0	0	0	160
405600e715167b5f59ca7a6438a970e2	148	34	157	446	523	5	7	132	0	65	0	8	17	51	0	6	84	213	0	15	15	66	27	0	154	23	48	50	107	178	0	0	0	7	0	48	0	125	107	13	87	0	119	66	0	0	89	0	37
3d2cd874a4eea35af603ca0c0c25c89f	293	186	0	591	0	97	79	121	0	459	196	154	139	0	0	218	9	0	0	0	0	0	0	0	0	6	29	23	0	0	70	0	0	0	0	172	714	0	0	0	0	0	0	32	162	0	0	74	0
901c9973bde010c1a5c49023e63cc252	96	108	71	96	36	66	109	80	103	61	89	34	99	96	19	57	112	9	91	79	79	63	26	109	118	21	58	21	34	0	0	9	0	43	12	30	34	77	31	72	104	78	0	143	130	53	32	34	147
e07164dc4c344fb8e6717042190ef640	546	812	50	304	0	586	0	0	0	47	0	0	0	190	0	0	0	619	179	0	0	0	0	702	0	0	0	0	0	0	0	0	0	0	0	0	0	0	0	0	0	0	0	0	0	0	0	0	0
cd2f42f12af82e310f2c16f0ebcee8b5	0	519	0	163	0	0	0	0	0	351	0	0	0	581	0	0	113	0	0	154	380	0	0	0	0	0	0	0	204	114	0	0	0	0	0	0	0	0	0	0	232	0	0	0	0	0	225	0	0
64bdf63dcb878049e0d12155c8ed7af1	360	242	146	0	295	78	193	237	466	146	0	234	0	47	0	0	159	133	0	181	123	0	0	0	0	0	0	83	0	90	0	69	0	29	106	121	0	136	0	0	112	269	0	0	157	225	0	0	0
4ee8eb346a3cc3189fb72179ea7c0825	90	0	0	0	22	0	0	0	166	0	0	0	324	0	0	131	0	0	824	639	0	343	0	0	0	0	0	133	0	0	0	0	0	0	0	0	0	0	460	0	0	1827	0	0	154	0	0	0	381
4380abc163ecefa354d7002925971253	36	0	38	307	118	99	89	55	125	17	40	108	10	183	14	155	92	46	0	120	117	176	14	65	0	50	163	45	42	0	0	13	0	77	39	6	75	103	7	28	45	0	0	26	0	69	0	82	0
42b19649d05c98ef9fb16195a409b87c	29	0	263	0	0	568	0	970	0	91	0	0	0	781	54	0	0	0	0	471	730	0	0	405	12	263	0	0	0	0	0	0	0	0	0	0	0	0	0	0	0	0	0	0	0	363	74	0	0
c446deb131fcc44553f50d10c5f7e52b	0	222	32	52	0	0	65	154	43	0	59	63	0	0	0	20	113	86	0	40	0	240	0	104	0	83	0	89	43	42	0	0	0	49	42	171	18	29	369	92	46	543	18	23	0	0	0	22	0
b310236a69032ef47e5c274f5256115a	0	0	0	0	218	0	0	0	48	0	0	0	0	0	0	0	0	0	0	0	0	0	0	0	168	287	0	126	0	0	307	0	0	0	40	0	0	269	0	67	174	80	0	0	0	0	0	364	0
e2bc41d7bb14564d77567a24bb117ee7	305	0	199	0	0	98	0	241	0	143	0	0	0	248	13	0	451	0	278	0	0	485	471	168	9	0	0	0	0	0	0	0	0	0	0	0	0	0	0	0	30	0	0	0	0	0	0	0	11
45ec8d8b3f3f833abb943a394602ca67	67	152	0	476	29	10	10	0	73	49	0	0	0	76	27	0	53	0	0	7	44	0	470	26	42	22	65	0	0	22	34	0	0	36	0	0	428	95	182	10	155	166	14	12	203	0	0	63	24
9f3ae9f6096976f00cd7c13a4717ff1c	141	125	78	58	9	40	37	214	59	18	58	73	83	176	21	34	52	106	266	18	71	15	42	147	71	19	65	122	11	24	53	44	0	47	9	0	48	140	61	0	115	215	5	61	142	70	0	46	285
04fc2a013ca103abb05f583df51dd717	25	129	79	0	0	0	218	182	337	154	24	19	8	7	6	0	43	0	6	0	24	45	0	34	0	12	85	34	0	304	15	0	0	0	0	0	292	0	42	0	0	212	182	0	76	0	18	54	137
4e1bda045e6ba843353281138c649093	71	63	0	240	17	0	14	15	75	0	72	152	75	0	0	6	43	0	19	61	121	166	0	115	148	0	214	165	28	0	72	51	0	36	10	0	0	542	73	90	48	162	0	98	41	45	23	0	44
31217980cfdf305668ba9c8482a34e81	76	150	59	83	0	25	0	0	88	0	92	42	63	10	0	59	118	40	31	17	65	87	0	169	187	37	0	28	92	45	89	61	0	138	9	8	12	84	299	81	36	0	67	27	49	0	0	72	0
ad967928a73ab98e764eee29f69d81ee	0	0	0	425	0	0	0	0	0	0	142	0	0	521	113	0	0	0	711	0	0	307	0	0	0	208	50	0	0	0	0	0	0	0	0	0	280	0	57	0	0	0	0	118	0	0	0	216	0
10055b4de0b725f946f9dc5f3e8409df	0	158	0	28	70	18	12	0	84	0	363	0	0	127	10	0	114	0	105	178	23	0	0	0	0	0	116	48	0	47	94	150	0	98	211	274	111	817	67	0	0	275	13	310	32	26	0	0	131
91a093473cad95da81d9ebb47d5ef0c5	0	0	0	76	50	0	48	0	32	38	65	159	31	111	0	115	157	0	148	52	37	98	113	13	0	8	73	103	27	9	49	134	0	0	29	200	57	209	137	18	51	95	33	35	57	111	18	133	132
1ed042ec7e64fa5c66f0898472c5ac02	5	86	74	52	69	118	72	179	318	83	42	151	21	29	155	4	54	5	130	144	36	245	142	80	0	87	138	0	43	102	0	70	0	0	23	21	0	212	0	19	22	6	0	0	0	0	110	37	0
cc82a5a0b284dea47583c8afa5a99755	56	98	126	57	92	49	0	127	114	34	318	26	83	0	16	15	64	9	84	26	35	134	112	144	45	19	0	94	56	106	0	109	0	22	36	151	95	0	166	49	0	197	0	70	172	0	12	46	367
8795c5a86013864dc11f24b89e8cdd8c	0	17	116	80	85	0	0	0	30	53	77	15	23	52	0	0	34	62	4	0	40	56	33	205	266	0	419	73	58	251	55	181	0	173	20	10	0	195	159	105	83	97	84	65	66	86	7	0	76
fd54faa463e99098527833fc9d14c4da	219	6	70	0	7	11	92	29	64	0	0	0	0	65	0	40	0	12	10	0	192	270	124	401	119	87	0	50	87	0	44	0	0	170	109	143	8	0	0	49	63	0	0	0	411	0	169	19	0
912487364b4fda5993a03f47d60111e9	60	167	112	181	60	0	69	108	129	0	80	94	14	0	14	62	52	0	133	59	48	0	122	96	0	32	24	125	97	55	0	55	0	70	0	71	67	72	57	14	0	0	131	143	26	25	0	0	77
cfdf39cd6545fb6a7ddb747c3393c225	1060	1084	0	0	0	0	0	0	0	0	0	45	0	0	0	0	80	0	0	72	0	0	0	254	0	0	0	0	0	0	0	0	0	96	0	0	302	0	0	14	0	0	0	31	97	0	0	155	0
851bd80d021dcf4e9f3f11e95310927c	125	73	39	167	101	11	36	47	68	29	45	72	0	40	43	19	101	46	160	39	36	127	59	66	46	24	0	198	22	71	0	71	0	96	154	26	148	143	209	0	21	248	42	121	214	52	0	29	211
[truncated: 43 more columns]

## Sheet: ASV_Taxonomy
ASV ID	taxonomy
0001d123420b59585627edf5a1292ae8	k__Bacteria; p__Proteobacteria; c__Alphaproteobacteria; o__Rhizobiales; f__Bradyrhizobiaceae; g__Balneimonas; s__
00154f00cb73359cd52cd47bb2f9ab3f	k__Bacteria; p__Firmicutes; c__Clostridia; o__Clostridiales; f__; g__; s__
00257344a745394a66444d38dbd49b6f	k__Bacteria; p__Firmicutes; c__Clostridia; o__Clostridiales; f__Lachnospiraceae; g__Defluviitalea; s__saccharophila
00681c85e21843b9156cb89478b94f8f	k__Bacteria; p__Firmicutes; c__Clostridia; o__Clostridiales; f__; g__; s__
006a06d6199e532b1d6b02ad140bb8ee	k__Bacteria; p__Firmicutes; c__Clostridia; o__Clostridiales; f__Lachnospiraceae; g__Clostridium; s__colinum
008a1de1634f83f81f89d8fdfcb7d34d	k__Bacteria; p__Firmicutes; c__Clostridia; o__Clostridiales; f__Lachnospiraceae; g__; s__
008b5348bb37b2b41e209c12458214f1	k__Bacteria; p__Bacteroidetes; c__Bacteroidia; o__Bacteroidales; f__Prevotellaceae; g__Prevotella; s__copri
00a96fbd0ac34bfd245f9c24f8737f7d	k__Bacteria; p__Firmicutes; c__Clostridia; o__Clostridiales; f__Lachnospiraceae; g__Blautia; s__obeum
00ae2ede0e9312990cd253d49bb62eb2	k__Bacteria; p__Firmicutes; c__Bacilli; o__Lactobacillales; f__Lactobacillaceae; g__Lactobacillus; s__iners
00cd2f68603124759047487807589f27	k__Bacteria; p__Firmicutes; c__Clostridia; o__Clostridiales
00cd366e7a05c06ebcac20aadc090cc7	k__Bacteria; p__Actinobacteria; c__Actinobacteria; o__Actinomycetales; f__Mycobacteriaceae; g__Mycobacterium; s__
00d2bfd458db807e323de703ef956d04	k__Bacteria; p__Firmicutes; c__Clostridia; o__Clostridiales; f__Lachnospiraceae
00d7474e257766c40d5f53aeb999960d	k__Bacteria; p__Firmicutes; c__Clostridia; o__Clostridiales; f__Lachnospiraceae; g__; s__
00d8be17ab9712b24d3fe7353722c83a	k__Bacteria; p__Firmicutes; c__Clostridia; o__Clostridiales; f__Christensenellaceae; g__; s__
00dbcec69924cc7694d15fa0e7d8ad8c	k__Bacteria; p__Firmicutes; c__Clostridia; o__Clostridiales; f__Ruminococcaceae; g__Oscillospira; s__
00ec6a37aeff7aed44367f53893fb4a5	k__Bacteria; p__Firmicutes; c__Bacilli; o__Lactobacillales; f__Lactobacillaceae; g__Lactobacillus; s__zeae
0105f9165739ed248d0a92c0de88449d	k__Bacteria; p__Firmicutes; c__Clostridia; o__Clostridiales
012ac1ecec082619a7c55e45cdac218a	k__Bacteria; p__Firmicutes; c__Clostridia; o__Clostridiales
016161b0807dfd0dd6b150a436496c5b	k__Bacteria; p__Tenericutes; c__Mollicutes; o__RF39; f__; g__; s__
01a2d99629204c9a28d82e0a091fc01a	k__Bacteria; p__Firmicutes; c__Clostridia; o__Clostridiales; f__; g__; s__
01c7f3f344906ce233912a21fb6cdea5	k__Bacteria; p__Planctomycetes; c__Planctomycetia; o__Planctomycetales; f__Planctomycetaceae; g__Planctomyces; s__
01ed14a17c2b86d4401f6401c657e36d	k__Bacteria; p__Firmicutes; c__Clostridia; o__Clostridiales; f__Peptostreptococcaceae; g__; s__
0203b297e79462f9cbe490c7ec41a792	k__Bacteria; p__Firmicutes; c__Clostridia; o__Clostridiales; f__Veillonellaceae; g__Dialister; s__
020f48a69f9bf40e54fbac885f94695a	k__Bacteria; p__Firmicutes; c__Clostridia; o__Clostridiales
021a45a046fdb190795384a097d8d438	k__Bacteria; p__Firmicutes; c__Erysipelotrichi; o__Erysipelotrichales; f__Erysipelotrichaceae; g__Clostridium; s__cocleatum
0232b56c81bb04fb94bdcfdf8b073ae1	k__Bacteria; p__Bacteroidetes; c__Bacteroidia; o__Bacteroidales; f__Porphyromonadaceae; g__Porphyromonas; s__endodontalis
0243b68c76049aa1b8c51a20333da950	k__Bacteria; p__Firmicutes; c__Clostridia; o__Clostridiales; f__; g__; s__
025dc989456892da1dc0ef5018eb3c8d	k__Bacteria; p__Proteobacteria; c__Betaproteobacteria; o__Neisseriales; f__Neisseriaceae; g__; s__
0278639f012e21f07140177e64a3cd7c	k__Bacteria; p__Actinobacteria; c__Actinobacteria; o__Actinomycetales; f__Cellulomonadaceae; g__Cellulomonas; s__
0285b8dd5d02d6c0fd8596e0355c78a8	k__Bacteria; p__Bacteroidetes; c__Bacteroidia; o__Bacteroidales; f__Prevotellaceae; g__Prevotella; s__nanceiensis
0292496d6b36ebf41b263f2fbc6a00a1	k__Bacteria; p__Bacteroidetes; c__Flavobacteriia; o__Flavobacteriales; f__Flavobacteriaceae; g__Flavobacterium; s__
02a6a87c1cc33119f9f2bd8df0953ed3	k__Bacteria; p__Proteobacteria; c__Deltaproteobacteria; o__MIZ46; f__; g__; s__
02dd75f976cd05e6517f3d4da0a1a415	k__Bacteria; p__Proteobacteria; c__Alphaproteobacteria; o__Rhizobiales; f__Xanthobacteraceae
03045d5bec06276b6d5365d11e24f8fd	k__Bacteria; p__Firmicutes; c__Clostridia; o__Clostridiales; f__Ruminococcaceae; g__Ruminococcus; s__
033fbceb761dda85e3e67e23c9d89324	k__Bacteria; p__Firmicutes; c__Clostridia; o__Clostridiales; f__Lachnospiraceae; g__Blautia; s__obeum
03472238bea8082719fc0174184167db	k__Bacteria; p__Proteobacteria; c__Gammaproteobacteria; o__Legionellales; f__Coxiellaceae; g__; s__
034baf773a9d8a7725a7572b72dc5efc	k__Bacteria; p__Proteobacteria; c__Betaproteobacteria; o__Neisseriales; f__Neisseriaceae; g__; s__
0355e66f39dc96a99e8803255f9c71df	k__Bacteria; p__Firmicutes; c__Clostridia; o__Clostridiales; f__Lachnospiraceae; g__Moryella; s__
0356b8bf9fd15d2b45124228f1e8a464	k__Bacteria; p__Proteobacteria; c__Alphaproteobacteria; o__Rhizobiales; f__Hyphomicrobiaceae; g__Devosia; s__
036b319e45a8766862fb9cfc8122ade4	k__Bacteria; p__Firmicutes; c__Bacilli; o__Bacillales; f__Paenibacillaceae; g__Paenibacillus; s__mucilaginosus
03795259067719dbb24eed673683487f	k__Bacteria; p__Firmicutes; c__Clostridia; o__Clostridiales; f__Ruminococcaceae; g__Clostridium
038a193b56dd34050e883532f6c18ef6	k__Bacteria; p__Planctomycetes; c__Planctomycetia; o__Gemmatales; f__Gemmataceae; g__; s__
038c60fde3026b08afdafc8f72d0faf2	k__Bacteria; p__Firmicutes; c__Clostridia; o__Clostridiales; f__Veillonellaceae; g__Selenomonas; s__
03a1f9f63e2fa6c7bdf27d33eba2b09d	k__Bacteria; p__Firmicutes; c__Clostridia; o__Clostridiales; f__Lachnospiraceae; g__; s__
03a93ed5e508b9f96b54fbf9eccf7f71	k__Bacteria; p__Firmicutes; c__Clostridia; o__Clostridiales; f__; g__; s__
03b444d1aff81db6bd8b5c46b0332d7e	k__Bacteria; p__Firmicutes; c__Erysipelotrichi; o__Erysipelotrichales; f__Erysipelotrichaceae; g__; s__
03b8ee6f94d1b95d8ae14f4c4cc5729c	k__Bacteria; p__Firmicutes; c__Clostridia; o__Clostridiales; f__Lachnospiraceae; g__Moryella; s__
03d1db1ccc574034f8242e94d57eca3b	k__Bacteria; p__Firmicutes; c__Clostridia; o__Clostridiales
03dae63615d851e4eb40506e8821a98e	k__Bacteria; p__Proteobacteria; c__Gammaproteobacteria; o__Legionellales; f__Legionellaceae; g__; s__
0438a5ba138f16c681d2a5ebd323d643	k__Bacteria; p__Firmicutes; c__Clostridia; o__Clostridiales; f__Lachnospiraceae; g__; s__
04551d3323a786ff624839f426ede82d	k__Bacteria; p__Firmicutes; c__Clostridia; o__Clostridiales; f__; g__; s__
045acd620c390c80b3447bae8b6a039b	k__Bacteria; p__Firmicutes; c__Clostridia; o__Clostridiales; f__Ruminococcaceae; g__Oscillospira; s__
04611dabe3583caf155167674ef7e0e4	k__Bacteria; p__Firmicutes; c__Clostridia; o__Clostridiales; f__; g__; s__
0461e5811cd58a1b663c5a50b0d6d3e3	k__Bacteria; p__Actinobacteria; c__Actinobacteria; o__Actinomycetales
046aa6d1c4f6aa865d0e7db8bf42df7a	k__Bacteria; p__Tenericutes; c__Mollicutes; o__RF39; f__; g__; s__
046b1c3e82fe3b6eb2f66b5cd8941e6a	k__Bacteria; p__Firmicutes; c__Clostridia; o__Clostridiales; f__Lachnospiraceae; g__Lachnoanaerobaculum; s__orale
049443cf184c6556cbd356458128b7c1	k__Bacteria; p__Firmicutes; c__Clostridia; o__Clostridiales; f__; g__; s__
04b6a9a9777ab073b133f2794fcc1862	k__Bacteria; p__Firmicutes; c__Clostridia; o__Clostridiales; f__Clostridiaceae; g__SMB53; s__
04b7ffcba1c4976348190302508c52af	k__Bacteria; p__Firmicutes; c__Clostridia; o__Clostridiales; f__Clostridiaceae
04c9267b89be49839e0237d7d00069cd	k__Bacteria; p__Firmicutes; c__Bacilli; o__Bacillales; f__Thermoactinomycetaceae; g__Thermoactinomyces; s__sanguinis
04e01841a5e1bf33dcc6bb33c6380138	k__Bacteria; p__Actinobacteria; c__Actinobacteria; o__Actinomycetales; f__Mycobacteriaceae; g__Mycobacterium
04ecfad5772d2e09a84a0f5ef460536c	k__Bacteria; p__Proteobacteria; c__Alphaproteobacteria; o__Rhizobiales; f__Methylobacteriaceae; g__Methylobacterium
04ed5181c6692de9d9378a166bb41d2b	k__Bacteria; p__Bacteroidetes; c__Bacteroidia; o__Bacteroidales; f__Prevotellaceae; g__Prevotella; s__melaninogenica
04f11566c760a465cbfa03687a11b21b	k__Bacteria; p__Firmicutes; c__Clostridia; o__Clostridiales; f__; g__; s__
04fc2a013ca103abb05f583df51dd717	k__Bacteria; p__Firmicutes; c__Clostridia; o__Clostridiales; f__Lachnospiraceae; g__; s__
050222f3e087e426b8104e8327f804e6	k__Bacteria; p__Proteobacteria; c__Gammaproteobacteria; o__Xanthomonadales; f__Xanthomonadaceae; g__Pseudoxanthomonas
05132b1dde6536848b2b69d54c367c2a	k__Bacteria; p__Proteobacteria; c__Gammaproteobacteria; o__Xanthomonadales; f__Xanthomonadaceae; g__Thermomonas; s__
052510a5ed0bc73052e812a6da0e9880	k__Bacteria; p__Bacteroidetes; c__Bacteroidia; o__Bacteroidales; f__[Paraprevotellaceae]; g__[Prevotella]; s__tannerae
0548b11b6de90319756016a02baab332	k__Bacteria; p__Proteobacteria; c__Gammaproteobacteria; o__Pasteurellales; f__Pasteurellaceae; g__Aggregatibacter; s__
0555cdedb6eb074b5801aaf144eee244	k__Bacteria; p__Firmicutes; c__Clostridia; o__Clostridiales; f__; g__; s__
055a152af3de0f154d64498dabcaa125	k__Bacteria; p__Actinobacteria; c__Actinobacteria; o__Actinomycetales; f__Actinopolysporaceae; g__; s__
0562e97bf8665edd5ae85899297a44a8	k__Bacteria; p__[Thermi]; c__Deinococci; o__Thermales; f__Thermaceae; g__Thermus; s__
0570b4a067b34904d37cb5ddc848b221	k__Bacteria; p__Firmicutes; c__Clostridia; o__Clostridiales; f__Lachnospiraceae; g__; s__
0586c4ebb253b2206ae0cf8876b669a2	k__Bacteria; p__Firmicutes; c__Bacilli; o__Lactobacillales; f__Lactobacillaceae; g__Lactobacillus; s__
0597aa88cc99049e750aa68afc9af982	k__Bacteria; p__Firmicutes; c__Clostridia; o__Clostridiales; f__Ruminococcaceae; g__Faecalibacterium; s__prausnitzii
059aec3a80fbbdf2510518eb216b346c	k__Bacteria; p__Firmicutes; c__Bacilli; o__Lactobacillales; f__Aerococcaceae; g__Aerococcus; s__
05d0170b3c31c819ef84148b53fbf50d	k__Bacteria; p__Firmicutes; c__Clostridia; o__Clostridiales; f__; g__; s__
060567978d81d3712c0c05f1b2331a76	k__Bacteria; p__Acidobacteria; c__Solibacteres; o__Solibacterales; f__; g__; s__
064994b4c406e9492fcb1fe9c6442adc	k__Bacteria; p__Firmicutes; c__Clostridia; o__Clostridiales; f__Veillonellaceae; g__Sporomusa; s__
065b8574b0e2ea1b6bf91fee374ade5e	k__Bacteria
065ffab08856ea8df8690c2b82027b39	k__Bacteria; p__Tenericutes; c__Mollicutes; o__RF39; f__; g__; s__
0677d90c1643cc396a20a3f4af562d85	k__Bacteria; p__Proteobacteria; c__Alphaproteobacteria; o__Rhizobiales; f__Hyphomicrobiaceae; g__Devosia; s__
068d2f822a1076813368840db2f348b9	k__Bacteria; p__Firmicutes; c__Bacilli; o__Bacillales; f__Paenibacillaceae; g__Paenibacillus; s__
06927acdb8ac47077a262b96e4732ddd	k__Bacteria; p__Firmicutes; c__Clostridia; o__Clostridiales; f__; g__; s__
06b8b2696b5b0979b25541c871f2912a	k__Bacteria; p__Firmicutes; c__Clostridia; o__Clostridiales; f__Lachnospiraceae; g__; s__
06bb3fa895e072e060638ec1131d0d3c	k__Bacteria; p__Proteobacteria; c__Alphaproteobacteria; o__Rhizobiales; f__Rhizobiaceae; g__Agrobacterium; s__
06ca8a0f60b4b28d67a9be2613fb7b07	k__Bacteria; p__Actinobacteria; c__Actinobacteria; o__Actinomycetales; f__Gordoniaceae; g__Gordonia; s__
06d030c52ab98546adb2d5072db178e2	k__Bacteria; p__Bacteroidetes; c__Bacteroidia; o__Bacteroidales; f__Prevotellaceae; g__Prevotella; s__
06f0925c653b5b1de02d9c5ddaf53237	k__Bacteria; p__Firmicutes; c__Bacilli; o__Bacillales; f__Planococcaceae; g__Ureibacillus; s__
06f825b512d903b9230e1a55d87359ee	k__Bacteria; p__Firmicutes; c__Bacilli; o__Lactobacillales; f__Streptococcaceae; g__Streptococcus
0704436fb43503da2b3af438466d7142	k__Archaea; p__Crenarchaeota; c__Thaumarchaeota; o__Nitrososphaerales; f__Nitrososphaeraceae; g__Candidatus Nitrososphaera; s__
070704a89f84a93261567321cd55416a	k__Bacteria; p__Actinobacteria; c__Actinobacteria; o__Actinomycetales; f__Cellulomonadaceae; g__Cellulomonas; s__
07116e93ac23d654a419caadd8507fe1	k__Bacteria; p__Proteobacteria; c__Betaproteobacteria; o__Neisseriales; f__Neisseriaceae; g__; s__
0715674d5871c0cdd61671c8ab7be132	k__Bacteria; p__Firmicutes; c__Clostridia; o__Clostridiales; f__Lachnospiraceae; g__Coprococcus; s__
0717f64b1acc58505c85e9958d2fddcc	k__Bacteria; p__Actinobacteria; c__Actinobacteria; o__Actinomycetales; f__Nocardioidaceae; g__; s__
071d0b3b60fc5c2a39d8f47c30eea735	k__Bacteria; p__Firmicutes; c__Clostridia; o__Clostridiales; f__; g__; s__
073bb70d008c93d8aa8dd786b83188be	k__Bacteria; p__Firmicutes; c__Clostridia; o__Clostridiales; f__; g__; s__
0745fdfa842d540b0c1ef38b51894c1c	k__Bacteria; p__Firmicutes; c__Clostridia; o__Clostridiales; f__[Tissierellaceae]; g__Finegoldia; s__
07512caee532f003ab8666e87a48b290	k__Bacteria; p__Firmicutes; c__Clostridia; o__Clostridiales; f__Lachnospiraceae; g__Roseburia; s__faecis
075ce9fa8440ec4d9ed86dbfeec2d27f	k__Bacteria; p__Firmicutes; c__Bacilli; o__Lactobacillales; f__Carnobacteriaceae; g__Carnobacterium; s__
0767c70b190e7f4e23a9088a2a8504a1	k__Bacteria; p__Firmicutes; c__Clostridia; o__Clostridiales; f__Lachnospiraceae
076b1a7529bf32cb1730b39747783111	k__Bacteria; p__Proteobacteria; c__Gammaproteobacteria; o__Xanthomonadales; f__Xanthomonadaceae; g__Xanthomonas; s__campestris
077f83789e48456d7497896c07c58615	k__Bacteria; p__Firmicutes; c__Clostridia; o__Clostridiales; f__[Tissierellaceae]; g__Anaerococcus; s__
0780b10be44c5f9835cba6ab6074b12e	k__Bacteria; p__Firmicutes; c__Clostridia; o__Clostridiales; f__; g__; s__
0784864f47da08b488d4528f92d68350	k__Bacteria; p__Firmicutes; c__Bacilli; o__Lactobacillales; f__Lactobacillaceae; g__Lactobacillus
07a80f25ba40ac6025a807833603b700	k__Bacteria; p__Bacteroidetes; c__Bacteroidia; o__Bacteroidales; f__Prevotellaceae; g__Prevotella; s__
07a99e7918bef0410508a6e192b70474	k__Bacteria; p__Firmicutes; c__Bacilli; o__Bacillales; f__Staphylococcaceae; g__Jeotgalicoccus; s__
07da22cab5c55a4badb462bcbbded642	k__Bacteria; p__Proteobacteria; c__Alphaproteobacteria; o__Rhizobiales; f__Phyllobacteriaceae; g__Phyllobacterium; s__
07ea091a67bf26ed5131e5516f57c9d9	k__Bacteria; p__Actinobacteria; c__Actinobacteria; o__Actinomycetales; f__Brevibacteriaceae; g__Brevibacterium; s__
082141bf0c475620ca2f0b84ef4c260c	k__Bacteria; p__Firmicutes; c__Clostridia; o__Clostridiales; f__[Mogibacteriaceae]; g__; s__
08493e5007dedc43c2a8fc96efb8cd21	k__Bacteria; p__Firmicutes; c__Bacilli; o__Bacillales; f__Paenibacillaceae; g__Brevibacillus; s__
0853714922513ab4ce8b29af88c0e3a1	k__Bacteria; p__Actinobacteria; c__Actinobacteria; o__Actinomycetales; f__Streptosporangiaceae; g__; s__
0859ff921ba0bf93349654deee635e84	k__Bacteria; p__Proteobacteria; c__Betaproteobacteria; o__Burkholderiales; f__Comamonadaceae
088713e60ed61b098778719ac18e3236	k__Bacteria; p__Firmicutes; c__Clostridia; o__Clostridiales; f__; g__; s__
08960402e55e801d57d6afa4dd048549	k__Bacteria; p__Firmicutes; c__Clostridia; o__Clostridiales; f__Lachnospiraceae; g__Blautia; s__
08a0cf376add32f3f4b57ec1e82a7a27	k__Bacteria; p__Firmicutes; c__Clostridia; o__Clostridiales; f__Veillonellaceae; g__Megamonas; s__
08b6aa188e22cb9192157ba0d4ed7f04	k__Bacteria; p__Actinobacteria; c__Actinobacteria; o__Actinomycetales; f__Brevibacteriaceae; g__Brevibacterium; s__paucivorans
08b6b09037d9c46762a2ef982b3c46d4	k__Bacteria; p__Fusobacteria; c__Fusobacteriia; o__Fusobacteriales; f__Leptotrichiaceae; g__Leptotrichia; s__
08bd43071a06abf56df235fca6655bea	k__Bacteria; p__Firmicutes; c__Clostridia; o__Clostridiales; f__Lachnospiraceae; g__[Ruminococcus]; s__torques
08bdc6c81f6b9daab3d132b54e1d45bc	k__Bacteria; p__Actinobacteria; c__Actinobacteria; o__Actinomycetales; f__Nocardiaceae; g__Rhodococcus; s__
08cc2f3a2dabb708e67f0abdb30b590b	k__Bacteria; p__Bacteroidetes; c__Bacteroidia; o__Bacteroidales; f__[Paraprevotellaceae]; g__[Prevotella]; s__tannerae
08ce27cee52afc14d82faaae7852a600	k__Bacteria; p__Firmicutes; c__Clostridia; o__Clostridiales; f__; g__; s__
08d7efdbab8381925b6ba9f810681a11	k__Bacteria; p__Firmicutes; c__Clostridia; o__Clostridiales; f__Ruminococcaceae; g__; s__
08e99f06801c5a0f0d4f663b4597898d	k__Bacteria; p__Firmicutes; c__Clostridia; o__Clostridiales; f__Lachnospiraceae; g__Coprococcus; s__
08eedcaf8f982611c4982038139f6271	k__Bacteria; p__Firmicutes; c__Clostridia; o__Clostridiales; f__; g__; s__
08faf2041b38f0c8f2faa68e7d5edd31	k__Bacteria; p__Firmicutes; c__Clostridia; o__Clostridiales; f__Lachnospiraceae
090c47cf723cdab4a453be6241339401	k__Bacteria; p__Proteobacteria; c__Gammaproteobacteria; o__Pseudomonadales; f__Moraxellaceae; g__Acinetobacter; s__johnsonii
0920dcf0f62fb2b3ab9e32f1c4edec37	k__Bacteria; p__Proteobacteria; c__Betaproteobacteria; o__Burkholderiales; f__Comamonadaceae
0924e8e3c0ed98c21735ff994b41cd32	k__Bacteria; p__Firmicutes; c__Erysipelotrichi; o__Erysipelotrichales; f__Erysipelotrichaceae; g__; s__
09697d4bb1560f2aa40b042352a249fd	k__Bacteria; p__Proteobacteria; c__Gammaproteobacteria; o__Enterobacteriales; f__Enterobacteriaceae
096aa868afaffdd4bd938b9faa623a2a	k__Bacteria; p__Firmicutes; c__Clostridia; o__Clostridiales; f__; g__; s__
096f911c3b198f8abf1001f06307306b	k__Bacteria; p__Firmicutes; c__Clostridia; o__Clostridiales
09743310fd999262437f54990235eb34	k__Bacteria; p__Firmicutes; c__Bacilli; o__Bacillales; f__Paenibacillaceae; g__Paenibacillus; s__
0986e77278a6c7c881c092aca8175c37	k__Bacteria; p__Bacteroidetes; c__Bacteroidia; o__Bacteroidales; f__[Paraprevotellaceae]; g__[Prevotella]; s__
09ae682c48b5cfcd884f54708879dca1	k__Bacteria; p__Proteobacteria; c__Gammaproteobacteria; o__Pseudomonadales; f__Pseudomonadaceae; g__Pseudomonas
09b236e011c4e7c9714ba84bc6633e9d	k__Bacteria; p__Verrucomicrobia; c__[Spartobacteria]; o__[Chthoniobacterales]; f__[Chthoniobacteraceae]; g__heteroC45_4W; s__
09b23b271929d8e4d3177c10b527e2db	k__Bacteria; p__Actinobacteria; c__Actinobacteria; o__Actinomycetales; f__Microbacteriaceae
09b6c97e49edb8272e2b437685d4f7a3	k__Bacteria; p__Proteobacteria; c__Alphaproteobacteria; o__Rhodospirillales; f__Acetobacteraceae; g__; s__
09ba0dcc9d08747a09b3a4ec08c8d529	k__Bacteria; p__Firmicutes; c__Clostridia; o__Clostridiales; f__[Mogibacteriaceae]; g__; s__
09de370e50aba298fdf9974f2ce70119	k__Bacteria; p__Bacteroidetes; c__Bacteroidia; o__Bacteroidales; f__Bacteroidaceae; g__Bacteroides; s__uniformis
09de3dde6c465b74bcb8e6f8a478e4e0	k__Bacteria; p__Actinobacteria; c__Actinobacteria; o__Actinomycetales; f__Nocardiaceae; g__Rhodococcus; s__fascians
09e672e78da332ce6b4eb9ec3d8f488d	k__Bacteria; p__Firmicutes; c__Clostridia; o__Clostridiales; f__Lachnospiraceae; g__Blautia; s__
09e996f449e880d1fd8f27d59e8d8b11	k__Bacteria; p__Firmicutes; c__Bacilli; o__Lactobacillales; f__Lactobacillaceae; g__Lactobacillus; s__zeae
09f6c9cc1408f366fddfcd2ee0ab8dce	k__Bacteria; p__Firmicutes; c__Clostridia; o__Clostridiales; f__Ruminococcaceae; g__Faecalibacterium; s__prausnitzii
0a1b6d0f4ff9409f74a9efca4f06dcce	k__Bacteria; p__Firmicutes; c__Clostridia; o__Clostridiales; f__; g__; s__
0a21726cd4952a96635576553da67787	k__Bacteria; p__Bacteroidetes; c__Bacteroidia; o__Bacteroidales; f__[Paraprevotellaceae]; g__[Prevotella]; s__
0a2a1363eab162d882ddc536df059ee3	k__Bacteria; p__Tenericutes; c__Mollicutes; o__RF39; f__; g__; s__
0a2ba23f15cba7c5d44c01d1e45174d1	k__Bacteria; p__Firmicutes; c__Clostridia; o__Clostridiales; f__Ruminococcaceae; g__Faecalibacterium; s__prausnitzii
0a2c6fc0183c2ff6a349ffbbae784e36	k__Bacteria; p__Proteobacteria; c__Gammaproteobacteria; o__Chromatiales; f__Ectothiorhodospiraceae; g__Halorhodospira; s__
0a3cf58d4ca062c13d42c9db4ebcbc53	k__Bacteria; p__Cyanobacteria; c__Chloroplast; o__Streptophyta; f__; g__; s__
0a481ce7ac94bbb06111229bfafda347	k__Bacteria; p__Proteobacteria; c__Gammaproteobacteria; o__Enterobacteriales; f__Enterobacteriaceae
0a5a7fa7d250792a0da3d1c5b101cda5	k__Bacteria; p__Firmicutes; c__Clostridia; o__Clostridiales; f__Christensenellaceae; g__; s__
0a68ec564e278b0246c920ad7de41880	k__Bacteria; p__Firmicutes; c__Clostridia; o__Clostridiales; f__Lachnospiraceae; g__Blautia; s__
0a6b255b855081b753153c706cc1829c	k__Bacteria; p__Proteobacteria; c__Betaproteobacteria; o__Burkholderiales; f__Oxalobacteraceae; g__Cupriavidus; s__
0a6b36733846c18814f0f5d7cc174061	k__Bacteria; p__Firmicutes; c__Bacilli; o__Lactobacillales; f__Lactobacillaceae; g__Lactobacillus; s__zeae
0a6f1a83f0350e7cbc751e6d4d7bf9af	k__Bacteria; p__Bacteroidetes; c__Bacteroidia; o__Bacteroidales; f__Bacteroidaceae; g__Bacteroides
0a857f235b897d7c44e86f0c1b75c69b	k__Bacteria; p__Bacteroidetes; c__Bacteroidia; o__Bacteroidales; f__[Paraprevotellaceae]; g__[Prevotella]; s__
0a8c08e2617ebeb3b6a92e486abda3c0	k__Bacteria; p__Actinobacteria; c__Actinobacteria; o__Actinomycetales; f__Microbacteriaceae
0a8fdcdeab017a6d5ed17922420f8aaa	k__Bacteria; p__Actinobacteria; c__Thermoleophilia; o__Solirubrobacterales; f__Patulibacteraceae; g__Patulibacter; s__
0a9666b9327e910d49fb6c596e9d0343	k__Bacteria; p__Firmicutes; c__Clostridia; o__Clostridiales
0a9947dd5482f98409379f843f38a3c3	k__Bacteria; p__Firmicutes; c__Clostridia; o__Clostridiales; f__Clostridiaceae; g__Clostridium; s__isatidis
0a9b67b5ef738dc17bf2cddbacb325b3	k__Bacteria; p__Firmicutes; c__Clostridia; o__Clostridiales; f__Clostridiaceae; g__Clostridium; s__
0ad2334ad30de68cbd3d6c42b1e06938	k__Bacteria; p__Firmicutes; c__Clostridia; o__Clostridiales; f__Lachnospiraceae; g__Clostridium
0ae4a56dcb070d2509b973c20d4e66be	k__Bacteria; p__Firmicutes; c__Clostridia; o__Clostridiales; f__[Mogibacteriaceae]; g__Anaerovorax; s__
0b03b4e824c1d7028167ed8ffccf217d	k__Bacteria; p__Firmicutes; c__Clostridia; o__Clostridiales; f__; g__; s__
0b085a4fec1a492a30b46aeeb05a66bc	k__Bacteria; p__Bacteroidetes; c__Bacteroidia; o__Bacteroidales; f__; g__; s__
0b15e129cc8756e64a8bad1d1f181797	k__Bacteria; p__Proteobacteria; c__Deltaproteobacteria; o__MIZ46; f__; g__; s__
0b2e4c1363c7b83bc72d7163ce266c7a	k__Bacteria; p__Firmicutes; c__Clostridia; o__Clostridiales; f__; g__; s__
0b31ceb520de38f82898148c19d4bbea	k__Bacteria; p__[Thermi]; c__Deinococci; o__Deinococcales; f__Deinococcaceae; g__Deinococcus; s__
0b35e211cbee6cf67d95c88a5474cadb	k__Bacteria; p__Actinobacteria; c__Actinobacteria; o__Actinomycetales; f__Cellulomonadaceae; g__Cellulomonas; s__
0b5be7ea3bc3fb399531fc198f71cfd5	k__Bacteria; p__Bacteroidetes; c__Bacteroidia; o__Bacteroidales; f__Bacteroidaceae; g__Bacteroides; s__
0b70be153e701006d1f3cd614f4791c9	k__Bacteria; p__Actinobacteria; c__Coriobacteriia; o__Coriobacteriales; f__Coriobacteriaceae; g__Collinsella; s__aerofaciens
0b930f83d5d8652aa08709a53a6fabf9	k__Bacteria; p__Firmicutes; c__Bacilli; o__Lactobacillales; f__Lactobacillaceae; g__Lactobacillus
0babf0cdd2d45dac8991f9d50bc535f9	k__Bacteria; p__Firmicutes; c__Clostridia; o__Clostridiales; f__[Mogibacteriaceae]; g__Anaerovorax; s__
0bae11e18b7d5b6f905fcb2cecf94bcf	k__Bacteria; p__Firmicutes; c__Clostridia; o__Clostridiales; f__; g__; s__
0bb155f78709cc170cd07e7b9c58d27e	k__Bacteria; p__Firmicutes; c__Bacilli; o__Bacillales; f__Planococcaceae; g__Ureibacillus; s__
0bb5f026bc49fa3efbc94e79af19af18	k__Bacteria; p__Firmicutes; c__Clostridia; o__Clostridiales; f__; g__; s__
0c1e42813a3a71f05089067544ca9288	k__Bacteria; p__Firmicutes; c__Clostridia; o__Clostridiales; f__; g__; s__
0c2c0883ef97d4707c06aad516aa075e	k__Bacteria; p__Firmicutes; c__Clostridia; o__Clostridiales
0c35ef455512ff56fcb00ec029af259c	k__Bacteria; p__Firmicutes; c__Clostridia; o__Clostridiales; f__; g__; s__
0c41e094009323df547672a233446475	k__Bacteria; p__Proteobacteria; c__Gammaproteobacteria; o__Legionellales; f__Legionellaceae; g__; s__
0c579d21280801f02a641e1608606927	k__Bacteria; p__Actinobacteria; c__Actinobacteria; o__Actinomycetales; f__Micrococcaceae; g__Micrococcus
0c5b2af9121de931625626b0b4d3d946	k__Bacteria; p__Firmicutes; c__Clostridia; o__Clostridiales; f__Veillonellaceae; g__Pelosinus; s__
0c6bcf4299448a81d288ae8892de422c	k__Bacteria; p__Firmicutes; c__Clostridia; o__Clostridiales; f__Lachnospiraceae; g__Blautia; s__
0c6c4004bbefc895185eb740c9af367c	k__Bacteria; p__Bacteroidetes; c__Bacteroidia; o__Bacteroidales; f__Prevotellaceae; g__Prevotella; s__pallens
0c7be84d689128a7d73a0191d896dc58	k__Bacteria; p__Bacteroidetes; c__Bacteroidia; o__Bacteroidales; f__Prevotellaceae; g__Prevotella; s__melaninogenica
0c98552db8231659bdfe2a780d0a751b	k__Bacteria; p__Firmicutes; c__Bacilli; o__Bacillales; f__Planococcaceae; g__Sporosarcina; s__
0cac30170a34eda261d04ae56379d6a8	k__Bacteria; p__Firmicutes; c__Clostridia; o__Clostridiales; f__Lachnospiraceae; g__Dorea; s__formicigenerans
0cc0183c6032ee75f65894789ff1c254	k__Bacteria; p__Firmicutes; c__Clostridia; o__Clostridiales; f__Ruminococcaceae; g__Ruminococcus; s__
0cc3c2e836597fe54fbec09e3231713e	k__Bacteria; p__Firmicutes; c__Clostridia; o__Clostridiales; f__Ruminococcaceae; g__Ruminococcus; s__
0cdb554cb7d6301b1c4bddf7363313cd	k__Bacteria; p__Bacteroidetes; c__Flavobacteriia; o__Flavobacteriales; f__Flavobacteriaceae; g__Capnocytophaga; s__
0ce15a44a5234c6063f54ed358f50469	k__Bacteria; p__Firmicutes; c__Clostridia; o__Clostridiales; f__Lachnospiraceae; g__[Ruminococcus]; s__
0d04c6e627d3852a70e819b5959e81b9	k__Bacteria; p__Bacteroidetes; c__Sphingobacteriia; o__Sphingobacteriales; f__Sphingobacteriaceae; g__Olivibacter; s__
0d286925c5c44f4681db1d14880bc53b	k__Bacteria; p__Proteobacteria; c__Alphaproteobacteria; o__Sphingomonadales; f__Sphingomonadaceae; g__Sphingobium; s__
0d4a4cb86480a183995602c3be9973da	k__Bacteria; p__Proteobacteria; c__Gammaproteobacteria; o__Pasteurellales; f__Pasteurellaceae; g__Haemophilus; s__influenzae
0d6696c7f3861be143d082d9d50ea0dc	k__Bacteria
0db0eb6c9ca0cd948c07ce596b5bfe82	k__Bacteria; p__Firmicutes; c__Clostridia; o__Clostridiales; f__Lachnospiraceae
0db4e7b4624da7b60ff2a6461b33c690	k__Bacteria; p__Firmicutes; c__Clostridia; o__Clostridiales; f__Lachnospiraceae; g__Coprococcus; s__
0dbb63d9aee197333df0c4a7ef521939	k__Bacteria; p__Actinobacteria; c__Actinobacteria; o__Actinomycetales; f__Microbacteriaceae; g__Clavibacter; s__
0dcef303f748d81e3446899a08e6a745	k__Bacteria; p__Firmicutes; c__Clostridia; o__Clostridiales; f__; g__; s__
0dcf5023e96fb8175d7bf02d900c9dd1	k__Bacteria; p__Firmicutes; c__Clostridia; o__Clostridiales; f__Ruminococcaceae; g__; s__
0dd0551c0dd279c12d8a31ad016f0a7b	k__Bacteria; p__Firmicutes; c__Clostridia; o__Clostridiales; f__Lachnospiraceae; g__[Ruminococcus]; s__gnavus
0dd174ca4f327a2d956208ed2d0f3d1a	k__Bacteria; p__Firmicutes; c__Clostridia; o__Clostridiales; f__; g__; s__
0e064a94474c099cd422c1ef160ab28c	k__Bacteria; p__Firmicutes; c__Clostridia; o__Clostridiales; f__Lachnospiraceae
0e15737671741c707e2fc53a6bf0ff68	k__Bacteria; p__Firmicutes; c__Clostridia; o__Clostridiales
0e226d197c2f253bcee5f15026512f90	k__Bacteria; p__Firmicutes; c__Clostridia; o__Clostridiales; f__Lachnospiraceae; g__Dorea; s__
0e2573348777e55615736ca01785b7b4	k__Bacteria; p__Firmicutes; c__Clostridia; o__Clostridiales; f__Lachnospiraceae
0e2bba3375078eac5971a256f802963c	k__Bacteria; p__Firmicutes; c__Clostridia; o__Clostridiales; f__Lachnospiraceae; g__; s__
0e2d370f860f8262fe2d1fd778dd030f	k__Bacteria; p__Actinobacteria; c__Actinobacteria; o__Actinomycetales; f__Corynebacteriaceae; g__Corynebacterium; s__
0e2ed2c86be453b036bee47a0692fda4	k__Bacteria; p__Firmicutes; c__Clostridia; o__Clostridiales; f__[Tissierellaceae]; g__Anaerococcus; s__
0e456f5727984fd5dfaa25b0eac96d05	k__Bacteria; p__Firmicutes; c__Clostridia; o__Clostridiales; f__Lachnospiraceae; g__Lachnoanaerobaculum; s__orale
0e6645acd71bc7e1dc285638b8c3b44b	k__Bacteria; p__Firmicutes; c__Clostridia; o__Clostridiales; f__Lachnospiraceae; g__; s__
0e690d2cd12d49193f248f26dde12732	k__Bacteria; p__Firmicutes; c__Clostridia; o__Clostridiales; f__Veillonellaceae; g__Dialister; s__
0e72f4c11807e087591bea6763e5c0e8	k__Bacteria; p__Firmicutes; c__Clostridia; o__Clostridiales; f__Lachnospiraceae; g__; s__
0e738b653c5273dbd7225e1c9e928751	k__Bacteria; p__Firmicutes; c__Bacilli; o__Gemellales; f__Gemellaceae
0e988a799991e737129af946ab30fbf0	k__Bacteria; p__Proteobacteria; c__Alphaproteobacteria; o__Sphingomonadales; f__Sphingomonadaceae; g__Sphingobium; s__
0e99e5f58090c211de4d0b4b849914a3	k__Bacteria; p__Firmicutes; c__Clostridia; o__Clostridiales; f__; g__; s__
0eb0c9f42a339355c75e3eaa920ca253	k__Bacteria; p__Firmicutes; c__Clostridia; o__Clostridiales; f__; g__; s__
0ec18da7bfa667d3219aa1e9a2cb269c	k__Bacteria; p__Firmicutes; c__Bacilli; o__Lactobacillales; f__Lactobacillaceae; g__Lactobacillus; s__helveticus
0ec6e78e9fb634a458d504394dacf0ab	k__Bacteria; p__Actinobacteria; c__Actinobacteria; o__Actinomycetales; f__Micrococcaceae; g__Rothia; s__mucilaginosa
0ecfc2fd4d575e42d28744aee30d8942	k__Bacteria; p__Firmicutes; c__Clostridia; o__Clostridiales; f__; g__; s__
0ed3a6836e138f14044f6950ad7280d2	k__Bacteria; p__Actinobacteria; c__Actinobacteria; o__Actinomycetales; f__Actinomycetaceae; g__Actinomyces; s__
0ed4b41d007ad100f908116182ca8eab	k__Bacteria; p__Proteobacteria; c__Gammaproteobacteria; o__Pseudomonadales; f__Pseudomonadaceae; g__Pseudomonas; s__veronii
0ed6854f5740a2eea5deb3af31db72c0	k__Bacteria; p__Firmicutes; c__Bacilli; o__Bacillales; f__Paenibacillaceae; g__Brevibacillus; s__
0ede181cba719902c5e1fa933644b97e	k__Bacteria; p__Firmicutes; c__Bacilli; o__Lactobacillales; f__Leuconostocaceae; g__Leuconostoc; s__
0ee2893d66f809b70d03b4e048c9a8f3	k__Bacteria; p__Proteobacteria; c__Alphaproteobacteria; o__Sphingomonadales; f__Sphingomonadaceae; g__Sphingomonas
0eec7fa869bd1ab78c84f1c70c39825f	k__Bacteria; p__Firmicutes; c__Clostridia; o__Clostridiales; f__Lachnospiraceae; g__Oribacterium; s__
0f06e6f23ebe74c38614cedd24eb86a3	k__Bacteria; p__Fusobacteria; c__Fusobacteriia; o__Fusobacteriales; f__Fusobacteriaceae; g__Fusobacterium; s__
0f18144d308ada95632ab5193d92073f	k__Bacteria; p__Proteobacteria; c__Gammaproteobacteria; o__Pseudomonadales; f__Pseudomonadaceae; g__Pseudomonas
0f276b28ea3ba352f6fd667c1e298c38	k__Bacteria; p__Firmicutes; c__Clostridia; o__Clostridiales; f__; g__; s__
0f2a5acc53e55f2c9f0c7409421dc5a0	k__Bacteria; p__Firmicutes; c__Clostridia; o__Clostridiales; f__Ruminococcaceae
0f3168e78c0943a28c34f37093b9a1c6	k__Bacteria; p__Bacteroidetes; c__Bacteroidia; o__Bacteroidales; f__Rikenellaceae; g__Alistipes; s__indistinctus
0f32ba22fbb460f164684cab3d94388b	k__Bacteria; p__Firmicutes; c__Clostridia; o__Clostridiales; f__Ruminococcaceae; g__Oscillospira; s__
0f498e3088016e1f02e37313241535f3	k__Bacteria; p__Bacteroidetes; c__Bacteroidia; o__Bacteroidales; f__Prevotellaceae; g__Prevotella; s__melaninogenica
0f4a15d85033f63632e910d9603f3918	k__Bacteria; p__Firmicutes; c__Clostridia; o__Clostridiales; f__Lachnospiraceae; g__; s__
0f4f05decc0b9e8d7812fac84ed992c0	k__Bacteria; p__Firmicutes; c__Clostridia; o__Clostridiales; f__Lachnospiraceae; g__; s__
0f603a9018080b298f6f858569d3b3e2	k__Bacteria; p__Firmicutes; c__Clostridia; o__Clostridiales; f__Ruminococcaceae; g__; s__
0f7b183901acd60418685b4fe37472c7	k__Bacteria; p__Firmicutes; c__Clostridia; o__Clostridiales; f__Christensenellaceae; g__Christensenella; s__
0f7fd63d5cd006955fe3f76176661cc7	k__Bacteria; p__Actinobacteria; c__Coriobacteriia; o__Coriobacteriales; f__Coriobacteriaceae; g__Atopobium; s__
0fa9b2ca1527c33928e33283f5f5fcc5	k__Bacteria; p__Firmicutes; c__Clostridia; o__Clostridiales; f__Lachnospiraceae; g__; s__
0fcf1fcd1e377174518146ffefefcec3	k__Bacteria; p__Firmicutes; c__Clostridia; o__Clostridiales; f__Veillonellaceae; g__; s__
0fde62806e4413be1846e836dba2c786	k__Bacteria; p__Firmicutes; c__Clostridia; o__Clostridiales; f__; g__; s__
0fe5e61c06d30a18c1a1e24f038263a1	k__Bacteria; p__Firmicutes; c__Bacilli; o__Lactobacillales; f__Carnobacteriaceae
0ff52ecd45be79c478d82cfd5bd2e9cd	k__Bacteria; p__Proteobacteria; c__Gammaproteobacteria; o__Pseudomonadales; f__Moraxellaceae; g__Acinetobacter; s__schindleri
10055b4de0b725f946f9dc5f3e8409df	k__Bacteria; p__Firmicutes; c__Clostridia; o__Clostridiales; f__; g__; s__
10381c60202a21f62c7f6b3be6f39b92	k__Bacteria; p__Firmicutes; c__Clostridia; o__Clostridiales; f__; g__; s__
1046ea6b71d7727f8695ce1ce37bbff4	k__Bacteria; p__Proteobacteria; c__Alphaproteobacteria; o__Sphingomonadales; f__Sphingomonadaceae
104a7990a9a42ce00faf4ab2a1c2fe46	k__Bacteria; p__Proteobacteria; c__Gammaproteobacteria; o__Pseudomonadales; f__Pseudomonadaceae; g__Pseudomonas; s__viridiflava
10504e295a3137107ce603765df9dcdb	k__Bacteria; p__Tenericutes; c__Mollicutes; o__RF39; f__; g__; s__
1066b7bd348f4cb9929e65df49144a2f	k__Bacteria; p__Fusobacteria; c__Fusobacteriia; o__Fusobacteriales; f__Leptotrichiaceae; g__Leptotrichia; s__
1071da9a28535a8c2fbc1ca430b15e67	k__Bacteria; p__Firmicutes; c__Clostridia; o__Clostridiales; f__Lachnospiraceae; g__; s__
107273e73071282e4d0f4a0b46548da5	k__Bacteria; p__Proteobacteria; c__Gammaproteobacteria; o__Aeromonadales; f__Aeromonadaceae
10771e265854ed47bbe562c3c0d88823	k__Bacteria; p__Firmicutes; c__Clostridia; o__Clostridiales; f__Veillonellaceae; g__Megasphaera; s__
107b03d4393cc32e587ea00b596f40f6	k__Bacteria; p__Cyanobacteria; c__4C0d-2; o__YS2; f__; g__; s__
107db8552f863136e5f7794c2efaade5	k__Bacteria; p__Firmicutes; c__Clostridia; o__Clostridiales; f__[Tissierellaceae]; g__Tepidimicrobium; s__
1082b9f1e6d902b2b5d6f3016d9ac551	k__Bacteria; p__Proteobacteria; c__Gammaproteobacteria; o__Enterobacteriales; f__Enterobacteriaceae
10a2fdc6e17ace008fccaa36aa011a14	k__Bacteria; p__Bacteroidetes; c__Bacteroidia; o__Bacteroidales; f__[Odoribacteraceae]; g__Butyricimonas; s__
10b69a78398124cec37135a04da66830	k__Bacteria; p__Firmicutes; c__Clostridia; o__Clostridiales; f__Ruminococcaceae; g__Oscillospira; s__
10b890326e2b0b15509aefb95d0d6b79	k__Bacteria; p__Bacteroidetes; c__Sphingobacteriia; o__Sphingobacteriales; f__Sphingobacteriaceae; g__Sphingobacterium; s__multivorum
10d97859256261be9411fdaefb44b4d3	k__Bacteria; p__Firmicutes; c__Clostridia; o__Clostridiales; f__Ruminococcaceae; g__Ethanoligenens; s__
10de7c04ff0b9dc89e4a6a1876a7b989	k__Bacteria; p__Firmicutes; c__Clostridia; o__Clostridiales; f__Clostridiaceae; g__Clostridium; s__intestinale
10ff4631cc5198bb5add391eccbd5a09	k__Bacteria; p__Firmicutes; c__Clostridia; o__Clostridiales; f__Ruminococcaceae; g__; s__
110e8cc0006c3843e11b4e2eb5c2627f	k__Bacteria; p__Proteobacteria; c__Betaproteobacteria; o__Burkholderiales; f__Oxalobacteraceae; g__Janthinobacterium; s__
113547fe7e466bcc193ede808aa8c944	k__Bacteria; p__Bacteroidetes; c__Bacteroidia; o__Bacteroidales; f__Rikenellaceae; g__Alistipes; s__finegoldii
11401ee29264e6f60b65371a2601cd07	k__Bacteria; p__Firmicutes; c__Clostridia; o__Clostridiales; f__Peptococcaceae; g__rc4-4; s__
11622d3af2aa97d3efc86804d80343fb	k__Bacteria; p__Firmicutes; c__Clostridia; o__Clostridiales; f__Lachnospiraceae; g__Coprococcus; s__
116395490e1b945dffb6483322c8a25b	k__Bacteria; p__Proteobacteria; c__Alphaproteobacteria; o__Caulobacterales; f__Caulobacteraceae; g__Brevundimonas; s__vesicularis
1181182ddf52fa0580ab5a61576d9cb0	k__Bacteria; p__Proteobacteria; c__Alphaproteobacteria; o__Sphingomonadales; f__Sphingomonadaceae; g__Sphingomonas; s__wittichii
11a5f0316ff4f3edb52c1b583a6e1448	k__Bacteria; p__Firmicutes; c__Clostridia; o__Clostridiales; f__; g__; s__
11ad751bada2e63c8dfde1a20f4e2ccc	k__Bacteria; p__Firmicutes; c__Bacilli; o__Bacillales; f__Paenibacillaceae; g__Paenibacillus; s__macerans
11b315a4eaa720ccf74411205545b050	k__Bacteria; p__Firmicutes; c__Clostridia; o__Clostridiales
11b7bb7d02a7be392bce27f6e0c9b80b	k__Bacteria; p__Firmicutes; c__Clostridia; o__Clostridiales; f__Lachnospiraceae; g__Dorea; s__
11b7d5a0dd0446562be236a4a9144c75	k__Bacteria; p__Firmicutes; c__Clostridia; o__Clostridiales; f__Ruminococcaceae; g__Oscillospira; s__
11c6abaafa7ba53a4d1a06ea9f7db98a	k__Bacteria; p__Firmicutes; c__Bacilli; o__Lactobacillales; f__Streptococcaceae; g__Streptococcus
11cd8623bdbf7f4a84bfffb43762a54c	k__Bacteria; p__Planctomycetes; c__Planctomycetia; o__Gemmatales; f__Isosphaeraceae; g__; s__
11d1f5f7713d005f67a74e08394e4420	k__Bacteria; p__Firmicutes; c__Clostridia; o__Clostridiales; f__Peptostreptococcaceae; g__; s__
11f53560b393da1cbb6b6dd70b4a5811	k__Bacteria; p__Proteobacteria; c__Alphaproteobacteria; o__Rhodospirillales; f__Acetobacteraceae; g__Acidocella; s__
121b72cfdbff9bade209033adcdc707b	k__Bacteria; p__Fusobacteria; c__Fusobacteriia; o__Fusobacteriales; f__Leptotrichiaceae; g__Sneathia; s__
121f8926d77afdf900730c9811ccc923	k__Bacteria; p__Bacteroidetes; c__Bacteroidia; o__Bacteroidales; f__Porphyromonadaceae; g__Porphyromonas; s__
1221aa1843fd57839ab89d68d1733444	k__Bacteria; p__Firmicutes; c__Clostridia; o__Clostridiales; f__[Tissierellaceae]; g__Anaerococcus; s__
123f5f38a6bab27b534c857c9fe19431	k__Bacteria; p__Firmicutes; c__Bacilli; o__Lactobacillales; f__Streptococcaceae; g__Streptococcus; s__
12470c486f558c083c46b45408cae9c6	k__Bacteria; p__Firmicutes; c__Clostridia; o__Clostridiales; f__Ruminococcaceae; g__; s__
124c9b8d0cd74d22f8ce87698d347315	k__Bacteria; p__[Thermi]; c__Deinococci; o__Thermales; f__Thermaceae; g__Meiothermus; s__
127ab4d6b721adf61edb79e241f12e7e	k__Bacteria; p__Firmicutes; c__Clostridia; o__Clostridiales; f__Lachnospiraceae; g__Blautia; s__
127d029e4712422f69cf80ceb163558b	k__Bacteria; p__Firmicutes; c__Clostridia; o__Clostridiales; f__; g__; s__
127f4e642673f0d91cc964199a56a4df	k__Bacteria; p__Firmicutes; c__Bacilli; o__Bacillales; f__Paenibacillaceae
128663d8fbf501fb5f4812f214e4f1bc	k__Bacteria; p__Firmicutes; c__Clostridia; o__Clostridiales; f__; g__; s__
128c7d599db88657c12c5c44a351ed1f	k__Bacteria; p__Proteobacteria; c__Betaproteobacteria; o__Burkholderiales; f__Comamonadaceae
12963a0081819a0bf6ff4d35c2777172	k__Bacteria; p__Firmicutes; c__Clostridia; o__Clostridiales; f__Lachnospiraceae; g__Blautia; s__
12fc40614a69d704ed046ae08ae4f9f0	k__Bacteria; p__Tenericutes; c__Mollicutes; o__RF39; f__; g__; s__
13016b09f7d9ec021bdf6b8eb3ebe1c2	k__Bacteria; p__Firmicutes; c__Clostridia; o__Clostridiales; f__Ruminococcaceae
1324c8e8b1b29cc424bb0d06670e26a0	k__Bacteria; p__Firmicutes; c__Clostridia; o__Clostridiales; f__[Mogibacteriaceae]; g__; s__
1328ddadac3f2d08eb25e79a18f7e574	k__Bacteria; p__Firmicutes; c__Clostridia; o__Clostridiales
1332b0dcde33b5f46ce13a45f40f5b9a	k__Bacteria; p__Firmicutes; c__Clostridia; o__Clostridiales; f__Dehalobacteriaceae; g__Dehalobacterium; s__
1339c728ff6942cd9b55cdbff7763027	k__Bacteria; p__Firmicutes; c__Clostridia; o__Clostridiales; f__Lachnospiraceae; g__Coprococcus; s__
13419053675ea7871774235038fc1c13	k__Bacteria; p__Firmicutes; c__Clostridia; o__Clostridiales; f__; g__; s__
13506518b825bfbd65794347af5958c6	k__Bacteria; p__Firmicutes; c__Clostridia; o__Clostridiales; f__; g__; s__
1354d8eddb9222983aca5a2fd2c6c7a5	k__Bacteria; p__Actinobacteria; c__Actinobacteria; o__Actinomycetales; f__Brevibacteriaceae; g__Brevibacterium
1368aca6d12ec4a9bbf16a2ff67104e1	k__Bacteria; p__Actinobacteria; c__Actinobacteria; o__Actinomycetales; f__Micrococcaceae; g__Microbispora; s__rosea
13723b4e82aeec834e9c4dec08803d4b	k__Bacteria; p__Actinobacteria; c__Actinobacteria; o__Actinomycetales; f__Micrococcaceae; g__Rothia; s__
1396b950677a0d669ebb6710d336615d	k__Bacteria; p__Firmicutes; c__Clostridia; o__Clostridiales
139f3606221ee22a0da037f401753c11	k__Bacteria; p__Firmicutes; c__Bacilli; o__Lactobacillales; f__Lactobacillaceae; g__Lactobacillus; s__delbrueckii
13a6a389a80ab9f13cc2edf207e20087	k__Bacteria; p__Firmicutes; c__Clostridia; o__Clostridiales; f__Lachnospiraceae
13cfc4c0874b157a123e49a24a7cc669	k__Bacteria; p__Firmicutes; c__Clostridia; o__Clostridiales; f__Ruminococcaceae; g__Ruminococcus; s__
13d4106b80e4172398ffff07098fcf25	k__Bacteria; p__Tenericutes; c__Mollicutes; o__RF39; f__; g__; s__
13e5e67a2599db5c3cdfa82c4c9ea6fd	k__Bacteria; p__Firmicutes; c__Clostridia; o__Clostridiales; f__Ruminococcaceae; g__; s__
13fac264cb50523fe1dd45be63beed17	k__Bacteria; p__Firmicutes; c__Bacilli; o__Bacillales; f__Paenibacillaceae; g__Paenibacillus; s__
142695742d23bcf69e134af5d3698cd1	k__Bacteria; p__Firmicutes; c__Bacilli; o__Lactobacillales; f__Lactobacillaceae; g__Lactobacillus; s__zeae
1427fd8aa8ae20a68e79fd2a7984c4ef	k__Bacteria; p__Firmicutes; c__Bacilli; o__Bacillales; f__Thermoactinomycetaceae; g__; s__
1431115ea01f7cf317221db758e73a45	k__Bacteria; p__Proteobacteria; c__Alphaproteobacteria; o__Sphingomonadales; f__Sphingomonadaceae; g__Sphingomonas; s__
143d8230a3b862aace0fc23c1fee1bf8	k__Bacteria; p__Firmicutes; c__Clostridia; o__Clostridiales; f__Veillonellaceae; g__; s__
145d5e1f6eb25ffc37ab8a3425912d4c	k__Bacteria; p__Bacteroidetes; c__Bacteroidia; o__Bacteroidales; f__Prevotellaceae; g__Prevotella; s__
1469ca5085a01fb6f3725632b315675f	k__Bacteria; p__Firmicutes; c__Clostridia; o__Clostridiales; f__; g__; s__
146f857a970d188b5ad310f5b78a274f	k__Bacteria; p__Bacteroidetes; c__Bacteroidia; o__Bacteroidales; f__Prevotellaceae; g__Prevotella; s__
1485707115ce4b362d3e7c8944c55a4f	k__Bacteria; p__Firmicutes; c__Erysipelotrichi; o__Erysipelotrichales; f__Erysipelotrichaceae; g__; s__
148a08c1b36564836a26134757c8b534	k__Bacteria; p__Firmicutes; c__Clostridia; o__Clostridiales; f__Lachnospiraceae; g__; s__
148bd165bffaa7ef6fe25a51f58c4f7f	k__Bacteria; p__Actinobacteria; c__Acidimicrobiia; o__Acidimicrobiales; f__; g__; s__
14a200cd85e855d4ad5b0fcb7122a6a6	k__Bacteria; p__Firmicutes; c__Clostridia; o__Clostridiales; f__Ruminococcaceae; g__Faecalibacterium; s__prausnitzii
14b7e18c5430792267220fdd4d5bcac8	k__Bacteria; p__Firmicutes; c__Clostridia; o__Clostridiales; f__Ruminococcaceae; g__Oscillospira; s__
14e78619269b8c45554ab4a8ddf2f22c	k__Bacteria; p__Firmicutes; c__Clostridia; o__Clostridiales; f__Ruminococcaceae; g__Oscillospira; s__
14f0cf24182e77164aff9e2cddb582ff	k__Bacteria; p__Bacteroidetes; c__Bacteroidia; o__Bacteroidales; f__Prevotellaceae; g__Prevotella; s__melaninogenica
14fa94b892d4726fffd71a869312f7a4	k__Bacteria; p__Firmicutes; c__Clostridia; o__Clostridiales; f__; g__; s__
14ffccdb90f36f616238b2720fb7f3ab	k__Bacteria; p__Firmicutes; c__Clostridia; o__Clostridiales; f__Lachnospiraceae; g__Blautia; s__
15019314fb37e02e1a251ea2e2d72141	k__Bacteria
15029a53d91a033bae30c1ad032ad804	k__Bacteria; p__Firmicutes; c__Clostridia; o__Clostridiales; f__Lachnospiraceae; g__; s__
151b3b94f14d97ec7add9ad78488952b	k__Bacteria; p__Actinobacteria; c__Actinobacteria; o__Actinomycetales; f__Actinosynnemataceae
1524b090dbd05a604d54ed8c2ced1acb	k__Bacteria; p__Fusobacteria; c__Fusobacteriia; o__Fusobacteriales; f__Leptotrichiaceae; g__Leptotrichia; s__
153a1c462f6c9cc86cb69c231e968272	k__Bacteria; p__Proteobacteria; c__Gammaproteobacteria; o__Pasteurellales; f__Pasteurellaceae; g__Actinobacillus
154216ffcdbd00e5dacbf88c3ff6ab8f	k__Bacteria; p__Proteobacteria; c__Alphaproteobacteria; o__Rhizobiales; f__Xanthobacteraceae; g__Ancylobacter; s__dichloromethanicus
15463e67c2a18d48fb5cd3e9009eb96c	k__Bacteria; p__Firmicutes; c__Clostridia; o__Clostridiales; f__Lachnospiraceae; g__; s__
155afdcd073c88170e14a1cfba9b1358	k__Bacteria; p__Firmicutes; c__Bacilli; o__Lactobacillales; f__Streptococcaceae; g__Streptococcus; s__
1560deac15c24f398a499719a5bc995b	k__Bacteria; p__Firmicutes; c__Clostridia; o__Clostridiales; f__Lachnospiraceae
1569f7ae988e26c905ab8fab427c8a0d	k__Bacteria; p__Firmicutes; c__Clostridia; o__Clostridiales; f__Veillonellaceae; g__Phascolarctobacterium; s__
15803e343ed68f405ceb11b3e508f426	k__Bacteria; p__Actinobacteria; c__Actinobacteria; o__Actinomycetales; f__Corynebacteriaceae; g__Corynebacterium; s__
15bd8361441d322d66a955c10a723c14	k__Bacteria; p__Actinobacteria; c__Actinobacteria; o__Actinomycetales; f__Actinomycetaceae; g__Actinomyces; s__
15c582600ef9aa081ebd557321e4760a	k__Bacteria; p__Bacteroidetes; c__Bacteroidia; o__Bacteroidales; f__Prevotellaceae; g__Prevotella; s__
15c6199023bc6e28cf83f14b19720efc	k__Bacteria; p__Actinobacteria; c__Actinobacteria; o__Actinomycetales; f__Corynebacteriaceae; g__Corynebacterium
15e83c24c67d39982cbfc03a9ddec501	k__Bacteria; p__Firmicutes; c__Clostridia; o__Clostridiales; f__Lachnospiraceae; g__Coprococcus; s__
16029965934a6ec79cb88d979a74ed25	k__Bacteria; p__Firmicutes; c__Clostridia; o__Clostridiales; f__Lachnospiraceae
161631ed5d68a479edc10cf7116b926d	k__Bacteria; p__Bacteroidetes; c__Bacteroidia; o__Bacteroidales; f__[Paraprevotellaceae]; g__[Prevotella]; s__
162dcb3929e23b071e65fda88174be74	k__Bacteria; p__Actinobacteria; c__Actinobacteria; o__Actinomycetales; f__Corynebacteriaceae; g__Corynebacterium; s__
162fc6b67da64529ededf667fb99d713	k__Bacteria; p__Actinobacteria; c__Actinobacteria; o__Actinomycetales; f__Microbacteriaceae
16507d6d1fdae768afc3e029bbb943fd	k__Bacteria; p__Firmicutes; c__Bacilli; o__Lactobacillales; f__Lactobacillaceae; g__Lactobacillus; s__iners
1653a46e0b900decfe4655b39b67f814	k__Bacteria; p__Proteobacteria; c__Gammaproteobacteria; o__Enterobacteriales; f__Enterobacteriaceae; g__Sodalis; s__
1657c77b4fbb3c38d5637558bbe59a40	k__Bacteria; p__Bacteroidetes; c__Bacteroidia; o__Bacteroidales; f__Porphyromonadaceae; g__Tannerella; s__
16885997da60245a3e3e263b99762b50	k__Bacteria; p__Firmicutes; c__Erysipelotrichi; o__Erysipelotrichales; f__Erysipelotrichaceae; g__; s__
16cfec1a849d55c80f8460b19d8def83	k__Bacteria; p__Proteobacteria; c__Alphaproteobacteria; o__Sphingomonadales; f__Sphingomonadaceae; g__Sphingomonas; s__
16f6aee4190ec850527279c50fbed2b7	k__Bacteria; p__Firmicutes; c__Clostridia; o__Clostridiales; f__Ruminococcaceae; g__Gemmiger; s__formicilis
16fd42870be73d9d0ba52e10e3dc4846	k__Bacteria; p__Chloroflexi; c__Thermomicrobia; o__JG30-KF-CM45; f__; g__; s__
17009bad41c852ee2df105be003548ba	k__Bacteria; p__Bacteroidetes; c__Flavobacteriia; o__Flavobacteriales; f__[Weeksellaceae]; g__; s__
170be7071c6216e06bae8b0b515452da	k__Bacteria; p__Proteobacteria; c__Betaproteobacteria; o__Burkholderiales; f__Comamonadaceae
1735122f6452284cae1574c71c9a6eec	k__Bacteria; p__Firmicutes; c__Bacilli; o__Bacillales; f__Planococcaceae; g__Aeribacillus; s__pallidus
1739d8f19c1ac366a2138b64b03047a9	k__Bacteria; p__Actinobacteria; c__Actinobacteria; o__Actinomycetales; f__Micrococcaceae; g__Rothia; s__mucilaginosa
17468ba94f69b01ce35673b238468c56	k__Bacteria; p__Firmicutes; c__Clostridia; o__Clostridiales; f__Ruminococcaceae; g__; s__
174b92af2be8de6574c205ce68f97bb7	k__Bacteria; p__Bacteroidetes; c__Bacteroidia; o__Bacteroidales; f__Prevotellaceae; g__Prevotella; s__
17759816b27903eb318a806fc14697dc	k__Bacteria; p__Firmicutes; c__Bacilli; o__Bacillales; f__Staphylococcaceae; g__Macrococcus; s__caseolyticus
177db53ded58fcf2915778bff9a04f2c	k__Bacteria; p__Tenericutes; c__Mollicutes; o__RF39; f__; g__; s__
17937d426b95d18810dfe715cce44627	k__Bacteria; p__Firmicutes; c__Clostridia; o__Clostridiales; f__Lachnospiraceae; g__[Ruminococcus]; s__gnavus
179beb90602a37152b5bd7e022db905b	k__Bacteria; p__Firmicutes; c__Clostridia; o__Clostridiales; f__Lachnospiraceae
17a95d750bf52981be53ac0c93c26694	k__Bacteria; p__Firmicutes; c__Clostridia; o__Clostridiales; f__Clostridiaceae; g__Clostridium; s__
17ae20a577370dc92154c6b1f5b2a5aa	k__Bacteria; p__Fusobacteria; c__Fusobacteriia; o__Fusobacteriales; f__Leptotrichiaceae; g__Leptotrichia; s__
17b9701f3594368dfdf752a323ad0039	k__Bacteria; p__Firmicutes; c__Bacilli; o__Bacillales; f__Paenibacillaceae; g__Paenibacillus
17e3b0c68a0c50a547dd9db57d609a89	k__Bacteria; p__Firmicutes; c__Clostridia; o__Clostridiales; f__Lachnospiraceae
183826dac62428bde714c1dc796f18e1	k__Bacteria; p__Actinobacteria; c__Actinobacteria; o__Actinomycetales; f__Brevibacteriaceae; g__Brevibacterium; s__
183b4a36051380683ff23640aeae4c1f	k__Bacteria; p__Firmicutes; c__Clostridia; o__Clostridiales; f__Clostridiaceae; g__Clostridium
1841ceeb252a3e471065c84c01175567	k__Bacteria; p__Firmicutes; c__Clostridia; o__Clostridiales; f__; g__; s__
184e36e73aea65ae969879632f3644b2	k__Bacteria; p__Bacteroidetes; c__Bacteroidia; o__Bacteroidales; f__Prevotellaceae; g__Prevotella; s__
185fd5fa18cb1cc8b0fa2bacf60af299	k__Bacteria; p__Firmicutes; c__Clostridia; o__Clostridiales
187752abd6f309a88b2d991d531903fe	k__Bacteria; p__Firmicutes; c__Clostridia; o__Clostridiales
18815673021edd693b75fa7d776bf536	k__Bacteria; p__Firmicutes; c__Clostridia; o__Clostridiales; f__Christensenellaceae; g__; s__
1888fb57e4b6768095e2deb636088f87	k__Bacteria; p__Proteobacteria; c__Betaproteobacteria; o__Neisseriales; f__Neisseriaceae; g__; s__
1890fa94a643eb6e05fa12f9f22f4291	k__Bacteria; p__Bacteroidetes; c__Bacteroidia; o__Bacteroidales; f__Prevotellaceae; g__Prevotella; s__melaninogenica
18916ff01c5cc30f13e73cab657abe0e	k__Bacteria; p__Firmicutes; c__Bacilli; o__Lactobacillales; f__Lactobacillaceae; g__Lactobacillus; s__
189530e341ca6120d46469cb29cf88ee	k__Bacteria; p__Firmicutes; c__Clostridia; o__Clostridiales; f__Ruminococcaceae; g__Gemmiger; s__formicilis
1897423f0a62b7e5e281904297cc2ca8	k__Bacteria; p__Firmicutes; c__Clostridia; o__Clostridiales; f__Lachnospiraceae; g__[Ruminococcus]; s__gnavus
18a4a3a73eb11752e8a4f82164046b74	k__Bacteria; p__Tenericutes; c__Mollicutes; o__RF39; f__; g__; s__
18a7085af84674e10c3ac9a7d2b1285f	k__Bacteria; p__Firmicutes; c__Clostridia; o__Clostridiales; f__Lachnospiraceae; g__Coprococcus; s__
18ac4f5d15861353f53f40e3ba71b514	k__Bacteria; p__Firmicutes; c__Clostridia; o__Clostridiales
18b5a8a03cd26abaf063ebd3d15ad968	k__Bacteria; p__Firmicutes; c__Clostridia; o__Clostridiales; f__Veillonellaceae; g__Selenomonas; s__
18c0df8de7419cb512c7891a04232609	k__Bacteria; p__Proteobacteria; c__Gammaproteobacteria; o__Pseudomonadales; f__Pseudomonadaceae; g__Pseudomonas; s__viridiflava
18c3fcdaae0b0b6f575c22b06195f540	k__Bacteria; p__Verrucomicrobia; c__[Spartobacteria]; o__[Chthoniobacterales]; f__[Chthoniobacteraceae]; g__; s__
18f397805102f2780cb6b5231c9d7125	k__Bacteria; p__Firmicutes; c__Clostridia; o__Clostridiales; f__; g__; s__
18fcc28747e60f83f335a557c4516b8a	k__Bacteria; p__Proteobacteria; c__Betaproteobacteria; o__Burkholderiales; f__Burkholderiaceae; g__Burkholderia; s__andropogonis
1900e8aeb6400849e6294cf82af2180d	k__Bacteria; p__Bacteroidetes; c__Bacteroidia; o__Bacteroidales; f__; g__; s__
1913ef270dfbe58ec3dd0a8b4590e46b	k__Bacteria; p__Firmicutes; c__Clostridia; o__Clostridiales; f__Ruminococcaceae; g__Oscillospira; s__
192b8624a2b48f081ea1bcf5a1db082c	k__Bacteria; p__Firmicutes; c__Clostridia; o__Clostridiales; f__Lachnospiraceae; g__; s__
1935b9726fc8e67ef0b72ec5208097ce	k__Bacteria; p__Actinobacteria; c__Actinobacteria; o__Actinomycetales; f__Nakamurellaceae; g__; s__
1935fea51cfbe50da222589365912e20	k__Bacteria; p__Firmicutes; c__Clostridia; o__Clostridiales; f__Lachnospiraceae; g__; s__
193c06b353635a3d20a3994678f43872	k__Bacteria; p__Firmicutes; c__Clostridia; o__Clostridiales; f__Veillonellaceae; g__Sporomusa; s__
193cbd196a17717af4a5096794dce410	k__Bacteria; p__Firmicutes; c__Clostridia; o__Clostridiales; f__Veillonellaceae; g__Sporomusa; s__
19461fa04167e165a5d4a27e14c8226d	k__Bacteria; p__Firmicutes; c__Clostridia; o__Clostridiales; f__Lachnospiraceae; g__; s__
195a54476a1802d75e0e773601fe964b	k__Bacteria; p__Actinobacteria; c__Actinobacteria; o__Actinomycetales; f__Corynebacteriaceae; g__Corynebacterium; s__
1966da37da48bd2e864e8547a055d338	k__Bacteria; p__Firmicutes; c__Clostridia; o__Clostridiales
1970af775bfecdd2ca50180b69989ee0	k__Bacteria; p__Firmicutes; c__Clostridia; o__Clostridiales; f__Lachnospiraceae; g__Coprococcus; s__
1973ac6923129a2bfc3b4b72f4ab75e0	k__Bacteria; p__Bacteroidetes; c__Bacteroidia; o__Bacteroidales; f__Prevotellaceae; g__Prevotella; s__
1982a9c682de2075e15364b335f407ea	k__Bacteria; p__Bacteroidetes; c__Flavobacteriia; o__Flavobacteriales; f__[Weeksellaceae]; g__Chryseobacterium; s__
19ae1eb0d5c4c49d04cb344274d0b02d	k__Bacteria; p__; c__; o__; f__; g__; s__
19b280d68bb4c07b72feac6dbb9ebcc1	k__Bacteria; p__Fusobacteria; c__Fusobacteriia; o__Fusobacteriales; f__Fusobacteriaceae; g__Fusobacterium; s__
19b5a182f60bc75bb4e94198c93d8025	k__Bacteria; p__Bacteroidetes; c__Bacteroidia; o__Bacteroidales; f__Porphyromonadaceae; g__Parabacteroides; s__
19d2d0a3e544be16de60735c221a17e1	k__Bacteria; p__Firmicutes; c__Clostridia; o__Clostridiales
19e8ded289e0127e8644ab2e92feb646	k__Bacteria; p__Actinobacteria; c__Actinobacteria; o__Actinomycetales; f__Nocardiopsaceae; g__; s__
19ef80552101164d363ca83d9f402056	k__Bacteria; p__Firmicutes; c__Clostridia; o__Clostridiales; f__Lachnospiraceae; g__; s__
1a0369d3782fb79ca3e8eb6a39b0a149	k__Bacteria; p__Firmicutes; c__Clostridia; o__Clostridiales; f__Ruminococcaceae; g__; s__
1a11aa5519dff18868eba6d69ba38168	k__Archaea; p__Crenarchaeota; c__Thaumarchaeota; o__Nitrososphaerales; f__Nitrososphaeraceae; g__Candidatus Nitrososphaera; s__
1a49c417b93bd1b5982015fdd064b001	k__Bacteria; p__Cyanobacteria; c__Chloroplast; o__Streptophyta; f__; g__; s__
1a5290f5be048b7116a0b1accafb9652	k__Bacteria; p__Firmicutes; c__Bacilli; o__Lactobacillales; f__Lactobacillaceae; g__Lactobacillus; s__helveticus
1a98067ddcbc9c8b9b47f010bfb31949	k__Bacteria; p__Firmicutes; c__Clostridia; o__Clostridiales; f__; g__; s__
1a9a80613022b7b1bac8b36e6369face	k__Bacteria; p__Firmicutes; c__Clostridia; o__Clostridiales
1a9b5b89f73fe0fb35b0f6297b9e06c5	k__Bacteria; p__Firmicutes; c__Clostridia; o__Clostridiales
1a9df3fbbc7fc8cecec4239cf801d2fc	k__Bacteria; p__Firmicutes; c__Clostridia; o__Clostridiales; f__Clostridiaceae; g__Clostridium; s__
1aba002fc9b326b0e5ca2804fc4d2607	k__Bacteria; p__Actinobacteria; c__Coriobacteriia; o__Coriobacteriales; f__Coriobacteriaceae; g__; s__
1af37d277c3b5e1325d6b9ff58145372	k__Bacteria; p__Firmicutes; c__Clostridia; o__Clostridiales
1aff498ff5feb37c032de8f327d01a0a	k__Bacteria; p__Firmicutes; c__Bacilli; o__Bacillales; f__Staphylococcaceae; g__Staphylococcus
1b102a75df9deab7277685dc9bfee690	k__Bacteria; p__Bacteroidetes; c__Bacteroidia; o__Bacteroidales; f__Prevotellaceae; g__Prevotella; s__
1b1672c52be2f362b8a15031f81c6638	k__Bacteria; p__Bacteroidetes; c__Bacteroidia; o__Bacteroidales; f__[Paraprevotellaceae]; g__[Prevotella]; s__
1b23e74fb43b2b8a2d20b91679cf8e0e	k__Bacteria; p__Actinobacteria; c__Actinobacteria; o__Bifidobacteriales; f__Bifidobacteriaceae; g__Bifidobacterium; s__animalis
1b37a58a83508103f7ede066b38c72cb	k__Bacteria; p__Fusobacteria; c__Fusobacteriia; o__Fusobacteriales; f__Fusobacteriaceae; g__Fusobacterium; s__
1b40855f894139ee825ba676916e6644	k__Bacteria; p__Bacteroidetes; c__Bacteroidia; o__Bacteroidales; f__Bacteroidaceae; g__Bacteroides; s__ovatus
1b5aa72a8971f998f5ca89390e6fefb7	k__Bacteria; p__Firmicutes; c__Clostridia; o__Clostridiales; f__Ruminococcaceae; g__Oscillospira; s__
1b5d50e4ae6a2cb153f3b2ca04699419	k__Bacteria; p__Firmicutes; c__Clostridia; o__Clostridiales; f__Lachnospiraceae; g__Anaerostipes; s__
1b6214bd04bbd7f4566a4fd022cf5763	k__Bacteria; p__Firmicutes; c__Clostridia; o__Clostridiales; f__Lachnospiraceae
1b8dec58597978264025b9eba656ffb5	k__Bacteria; p__Bacteroidetes; c__Bacteroidia; o__Bacteroidales; f__Bacteroidaceae; g__Bacteroides; s__ovatus
1b92901eaf73176b86069084ac8c13e3	k__Bacteria; p__Firmicutes; c__Clostridia; o__Clostridiales; f__; g__; s__
1b9ab7ba8573cbfe5f1a9f59f0b38ff4	k__Bacteria; p__Actinobacteria; c__Coriobacteriia; o__Coriobacteriales; f__Coriobacteriaceae; g__Adlercreutzia; s__
1baf58940d769377412fe2cd8cd1a140	k__Bacteria; p__Firmicutes; c__Clostridia; o__Clostridiales; f__[Tissierellaceae]; g__Anaerococcus; s__
1bafe2718d9c0cc58a98eeee81340ec3	k__Bacteria; p__Tenericutes; c__Mollicutes; o__RF39; f__; g__; s__
1bc00b2524966822fb4d1ddb79d9e7a8	k__Bacteria; p__Firmicutes; c__Clostridia; o__Clostridiales; f__Lachnospiraceae; g__; s__
1bc14b7a0febeb970d0584a038d1ece8	k__Bacteria; p__Firmicutes; c__Clostridia; o__Clostridiales; f__Veillonellaceae; g__Sporomusa; s__
1bc376f0046098ffc10a7f78d401eee9	k__Bacteria; p__Firmicutes; c__Clostridia; o__Clostridiales; f__Ruminococcaceae; g__; s__
1bdb0ffd8f876ab231845fd830a53d6a	k__Bacteria; p__Firmicutes; c__Clostridia; o__Clostridiales; f__; g__; s__
1be561baa2a8815798be19f3d19297fb	k__Bacteria; p__Firmicutes; c__Clostridia; o__Clostridiales; f__Lachnospiraceae; g__Blautia; s__producta
1c15cc2e879cebc8e17c951a3be01044	k__Bacteria; p__Firmicutes; c__Clostridia; o__Clostridiales; f__Lachnospiraceae; g__; s__
1c1d833cb2b15abe9532cf3c9988d9ff	k__Bacteria; p__Firmicutes; c__Clostridia; o__Clostridiales; f__Lachnospiraceae
1c250cc0110f74f329199d57d334771e	k__Bacteria; p__Firmicutes; c__Clostridia; o__Clostridiales; f__Clostridiaceae; g__Clostridium; s__
1c281deaf71c6d702d1ddadfa953eac6	k__Bacteria; p__Firmicutes; c__Clostridia; o__Clostridiales; f__; g__; s__
1c4f71b06ad9d613e117b633de27a107	k__Bacteria; p__Bacteroidetes; c__Bacteroidia; o__Bacteroidales; f__Bacteroidaceae; g__Bacteroides; s__eggerthii
1c57589065809b1790d60628e1ced7e9	k__Bacteria; p__Firmicutes; c__Clostridia; o__Clostridiales; f__Lachnospiraceae; g__; s__
1c6c4505d376a456ab2c4d091dab9c17	k__Bacteria; p__Tenericutes; c__Mollicutes; o__RF39; f__; g__; s__
1c6ce851f520a109f2e11b0ab5178f6f	k__Bacteria; p__Proteobacteria; c__Betaproteobacteria; o__Neisseriales; f__Neisseriaceae; g__; s__
1c7bdc6ae38c4f7a437813380e5de8d3	k__Bacteria; p__Tenericutes; c__Mollicutes; o__RF39; f__; g__; s__
1c83631763560879135b4c1892213816	k__Bacteria; p__Proteobacteria; c__Betaproteobacteria; o__Burkholderiales; f__Oxalobacteraceae; g__Janthinobacterium; s__
1c9537c624301fbacbeb9d02e827a0f3	k__Bacteria; p__Firmicutes; c__Bacilli; o__Bacillales; f__Paenibacillaceae; g__Cohnella; s__
1c9c8bdc4ec61b6a431f37e1f497065c	k__Bacteria; p__Firmicutes; c__Clostridia; o__Clostridiales; f__[Mogibacteriaceae]; g__Anaerovorax; s__
1ca6c232223e11140a64765c71b31445	k__Bacteria; p__Firmicutes; c__Clostridia; o__Clostridiales; f__; g__; s__
1cb2a1d29636124b450eca362d186b81	k__Bacteria; p__Firmicutes; c__Clostridia; o__Clostridiales
1cb8e29f798012f1230e878a99b2e0f4	k__Bacteria; p__Firmicutes; c__Clostridia; o__Clostridiales; f__Lachnospiraceae; g__Oribacterium; s__
1cd767f320bf1d2646e4b959c283dff4	k__Bacteria; p__Firmicutes; c__Clostridia; o__Clostridiales; f__Peptococcaceae; g__Dehalobacter_Syntrophobotulus; s__
1cefdeb330a456d7c3b31bf875680277	k__Bacteria; p__Actinobacteria; c__Coriobacteriia; o__Coriobacteriales; f__Coriobacteriaceae; g__Collinsella; s__aerofaciens
1cf1ef4082a77806135dcaaa5c99a91d	k__Bacteria; p__Firmicutes; c__Clostridia; o__Clostridiales; f__Ruminococcaceae
1d0518ba1b25c4375ba07d1e48b3fb30	k__Bacteria; p__Proteobacteria; c__Betaproteobacteria; o__Burkholderiales; f__Burkholderiaceae; g__Burkholderia; s__bryophila
1d1866b15b97af7634e2035b431e89ad	k__Bacteria; p__Firmicutes; c__Clostridia; o__Clostridiales; f__; g__; s__
1d1d1e767d215465ae742b4f33da77db	k__Bacteria; p__Firmicutes; c__Clostridia; o__Clostridiales; f__Ruminococcaceae; g__Oscillospira; s__
1d1ef4cfd93e4312369311b3053b9acd	k__Bacteria; p__Firmicutes; c__Clostridia; o__Clostridiales; f__Ruminococcaceae; g__; s__
1d3084f3cebdcbb568fd2aafeb3af63d	k__Bacteria; p__Firmicutes; c__Bacilli; o__Lactobacillales; f__Lactobacillaceae; g__Lactobacillus; s__iners
1d3aa35c59f2943f33a80283bd39336d	k__Bacteria; p__Firmicutes; c__Clostridia; o__Clostridiales; f__Lachnospiraceae; g__Blautia; s__
1d73da6d19b156283d71946adb1823b2	k__Bacteria; p__Actinobacteria; c__Actinobacteria; o__Actinomycetales; f__Actinomycetaceae; g__Actinomyces; s__
1d8df25b6007a443390a9199f8368844	k__Bacteria; p__Firmicutes; c__Clostridia; o__Clostridiales; f__Lachnospiraceae
1d9896d37e95380b1425c1e2e520ffa1	k__Bacteria; p__Actinobacteria; c__Actinobacteria; o__Actinomycetales; f__Actinosynnemataceae
1d9a5ba78b68a6a4e27d52ccb4dceaa7	k__Bacteria; p__Firmicutes; c__Clostridia; o__Clostridiales
1dc3a7cd36625f81a603740de6b3160b	k__Bacteria; p__Proteobacteria; c__Alphaproteobacteria; o__Rhizobiales; f__Phyllobacteriaceae; g__Mesorhizobium; s__
1dca104d96e09a385302f0e0ec8b8553	k__Bacteria; p__Actinobacteria; c__Actinobacteria; o__Actinomycetales; f__Microbacteriaceae
1df5c36d4014bc24aa480a69b4ca02d5	k__Bacteria; p__Proteobacteria; c__Betaproteobacteria; o__Burkholderiales; f__Burkholderiaceae; g__Burkholderia; s__andropogonis
1df983cc68128803b2ff55d23207f0a5	k__Bacteria; p__Firmicutes; c__Clostridia; o__Clostridiales; f__Ruminococcaceae
1e00cbc42c71e9828216ff47b830142e	k__Bacteria; p__Bacteroidetes; c__Bacteroidia; o__Bacteroidales; f__; g__; s__
1e040db0048bb4067f6d355cb45648dd	k__Bacteria; p__Firmicutes; c__Clostridia; o__Clostridiales; f__Lachnospiraceae
1e238cf69a93a1a2daa7c27cf7f252f1	k__Bacteria; p__Firmicutes; c__Clostridia; o__Clostridiales; f__Lachnospiraceae
1e394eb654cc5a1a26b98aa8fe04f136	k__Bacteria; p__Proteobacteria; c__Alphaproteobacteria; o__Rickettsiales; f__mitochondria
1e497e1ac49d920ea0cdd51644f96fcf	k__Bacteria; p__Firmicutes; c__Clostridia; o__Clostridiales; f__; g__; s__
1e4abd9e7eb423eff0a4b9fdc1b816a1	k__Bacteria; p__Proteobacteria; c__Alphaproteobacteria; o__Rhodobacterales; f__Rhodobacteraceae; g__Paracoccus
1e4c2b0b60c767292f547e972d5739a4	k__Bacteria; p__Firmicutes; c__Erysipelotrichi; o__Erysipelotrichales; f__Erysipelotrichaceae; g__Clostridium; s__cocleatum
1e6c86460cc142758657d810c1ea55cb	k__Bacteria; p__Firmicutes; c__Bacilli; o__Bacillales; f__Paenibacillaceae; g__Brevibacillus; s__thermoruber
1e6cab71d67b661890d73129cc87f8aa	k__Bacteria; p__Firmicutes; c__Clostridia; o__Clostridiales; f__; g__; s__
1e826672166198b1ab39749850ec5c7e	k__Bacteria; p__Proteobacteria; c__Alphaproteobacteria; o__Sphingomonadales; f__Sphingomonadaceae; g__Sphingomonas; s__wittichii
1eaa3cb7baaac3220b0606e3621afd16	k__Bacteria; p__Bacteroidetes; c__Bacteroidia; o__Bacteroidales; f__Rikenellaceae
1eb78c0f104160787e2a0c27858baeed	k__Bacteria; p__Actinobacteria; c__Actinobacteria; o__Actinomycetales; f__Streptomycetaceae; g__Streptomyces
1ec78cf2c330d5a8e7c5c57640213633	k__Bacteria; p__Firmicutes; c__Clostridia; o__Clostridiales; f__Ruminococcaceae
1ec9fd06c88669eb15764e0b441ade46	k__Bacteria; p__Proteobacteria; c__Betaproteobacteria; o__Burkholderiales; f__Burkholderiaceae; g__Burkholderia; s__andropogonis
1ecf60b8c3e958513bb2609d72548324	k__Bacteria; p__Fusobacteria; c__Fusobacteriia; o__Fusobacteriales; f__Fusobacteriaceae; g__Fusobacterium; s__
1ed042ec7e64fa5c66f0898472c5ac02	k__Bacteria; p__Firmicutes; c__Clostridia; o__Clostridiales; f__; g__; s__
1ed6f4ce71546bfb9593edd78456b74f	k__Bacteria; p__Firmicutes; c__Bacilli; o__Bacillales; f__Bacillaceae; g__Bacillus; s__ginsengihumi
1ef76c763d1cc45fe0c02dd8c886ac71	k__Bacteria; p__Firmicutes; c__Clostridia; o__Clostridiales; f__Lachnospiraceae; g__Coprococcus; s__
1f0532e025d966a685fd0d1f3144bc8a	k__Bacteria; p__Firmicutes; c__Clostridia; o__Clostridiales; f__Peptostreptococcaceae; g__Peptostreptococcus; s__
1f3d20f8f9bfb29a4ae7eaf2962cd4b4	k__Bacteria; p__Firmicutes; c__Clostridia; o__Clostridiales; f__; g__; s__
1fb6ab5be1d427ef2ed5faeaacd60eca	k__Bacteria; p__Firmicutes; c__Bacilli; o__Bacillales; f__Planococcaceae; g__Lysinibacillus; s__massiliensis
1fdb09b154f347c35de3aad68774cb79	k__Bacteria; p__Firmicutes; c__Clostridia; o__Clostridiales; f__Lachnospiraceae; g__; s__
1fe1461e7a8ff837f64889395fcfe107	k__Bacteria; p__Actinobacteria; c__Actinobacteria; o__Actinomycetales
204e528f5aec2e81f7915c9c6a94cee6	k__Bacteria; p__Firmicutes; c__Clostridia; o__Clostridiales; f__Lachnospiraceae; g__; s__
205f7c9427839dda63f9f6d35a237869	k__Bacteria; p__Firmicutes; c__Clostridia; o__Clostridiales; f__Clostridiaceae; g__Clostridium; s__celatum
206d00445a497d2441220533e0f6435a	k__Bacteria; p__Actinobacteria; c__Actinobacteria; o__Actinomycetales; f__Sanguibacteraceae; g__Sanguibacter; s__
2072e0266de775a96528022bb0f756f3	k__Bacteria; p__Firmicutes; c__Clostridia; o__Clostridiales; f__Clostridiaceae
208a08b90e13b04d2ef2f584535a2d39	k__Bacteria; p__Deferribacteres; c__Deferribacteres; o__Deferribacterales; f__Deferribacteraceae; g__Mucispirillum; s__schaedleri
208a9c153aaf8525d0e7083e6ef2864a	k__Bacteria; p__Firmicutes; c__Clostridia; o__Clostridiales; f__; g__; s__
208c0c43c7c5d4a6bb549e0c8365cd21	k__Bacteria; p__Firmicutes; c__Clostridia; o__Clostridiales; f__Lachnospiraceae; g__Lachnospira; s__
209dc38ee55fd0f3fa63ba19b94a5a4b	k__Bacteria; p__Firmicutes; c__Clostridia; o__Clostridiales
20a7aa268cdc6443e94e5b35773e1a22	k__Bacteria; p__Firmicutes; c__Clostridia; o__Clostridiales; f__Lachnospiraceae; g__[Ruminococcus]; s__gnavus
20ac30224f0d6923615fbc03ac84563f	k__Bacteria; p__Firmicutes; c__Clostridia; o__Clostridiales; f__Ruminococcaceae; g__Oscillospira; s__
20b3df08cd5fac2be26a2928155bab69	k__Bacteria; p__Proteobacteria; c__Betaproteobacteria; o__Burkholderiales; f__Alcaligenaceae; g__Achromobacter; s__
20ffb1eb28a74810e0c5fd95825aacb5	k__Bacteria; p__Firmicutes; c__Clostridia; o__Clostridiales
21014c826eccb21a176d1a538fcc7906	k__Bacteria; p__Bacteroidetes; c__Bacteroidia; o__Bacteroidales; f__Bacteroidaceae; g__Bacteroides; s__ovatus
2101c2720ecd86d00f5518f523d07a13	k__Bacteria; p__Chlamydiae; c__Chlamydiia; o__Chlamydiales; f__Parachlamydiaceae
210e2c47492c2c721a47bf60d0e28cb7	k__Bacteria; p__Firmicutes; c__Clostridia; o__Clostridiales; f__Ruminococcaceae; g__Oscillospira; s__
2110c07682b6ec240a71241a50d90fa3	k__Bacteria; p__Planctomycetes; c__Planctomycetia; o__Gemmatales; f__Isosphaeraceae; g__; s__
21114812f5f2310730c9f218f62d88be	k__Bacteria; p__Firmicutes; c__Clostridia; o__Clostridiales; f__; g__; s__
2115be57c1ee9385fc75f5c1d2adf521	k__Bacteria; p__Fusobacteria; c__Fusobacteriia; o__Fusobacteriales; f__Fusobacteriaceae; g__Fusobacterium; s__
212a80f24d6b5b5282958baab371202b	k__Bacteria; p__Firmicutes; c__Clostridia; o__Clostridiales; f__Lachnospiraceae; g__; s__
21581e401eb54723bb6de93439a3cee2	k__Bacteria; p__Firmicutes; c__Bacilli; o__Bacillales; f__Bacillaceae; g__Geobacillus; s__thermodenitrificans
21667d86cf76f29d93f3302c043d8a02	k__Bacteria; p__Proteobacteria; c__Betaproteobacteria; o__Burkholderiales; f__Comamonadaceae; g__Tepidimonas; s__
2197e3c697e9c1427ae1c3277d3c71f9	k__Bacteria; p__Firmicutes; c__Clostridia; o__Clostridiales; f__; g__; s__
21a2a9b12d5394c6301fa0490f72f96f	k__Bacteria; p__Firmicutes; c__Clostridia; o__Clostridiales; f__Lachnospiraceae; g__; s__
21b19f64e6affc9531a58a1611b5c980	k__Bacteria; p__Firmicutes; c__Bacilli; o__Bacillales; f__Paenibacillaceae; g__Paenibacillus; s__amylolyticus
21d24d87336a5ed939c13da81cbcc7f9	k__Bacteria; p__Proteobacteria; c__Alphaproteobacteria; o__Rhizobiales; f__Hyphomicrobiaceae; g__Rhodoplanes; s__
21dcfff18d552ae0ca669d213652bda3	k__Bacteria; p__Firmicutes; c__Clostridia; o__Clostridiales; f__Ruminococcaceae; g__; s__
21deb1e92aab95089f96c16a520f9a7b	k__Bacteria; p__Bacteroidetes; c__Sphingobacteriia; o__Sphingobacteriales; f__Sphingobacteriaceae; g__; s__
21ece8836aa5d912fae265582062009f	k__Bacteria; p__Fusobacteria; c__Fusobacteriia; o__Fusobacteriales; f__Fusobacteriaceae; g__Fusobacterium; s__
221dbaf580e1944a357a16526a4ca143	k__Bacteria; p__Firmicutes; c__Clostridia; o__Clostridiales; f__Lachnospiraceae; g__Butyrivibrio; s__
222566513c7da53a46f3dc75eb80c732	k__Bacteria; p__Actinobacteria; c__Actinobacteria; o__Actinomycetales; f__Streptosporangiaceae
223141ee97781bbede60bb494d599448	k__Bacteria; p__Firmicutes; c__Clostridia; o__Clostridiales; f__Lachnospiraceae; g__Coprococcus; s__
2233a3617df91625ef188e0a87926c43	k__Bacteria; p__Firmicutes; c__Clostridia; o__Clostridiales; f__; g__; s__
224102d609b83a172b11bd9115107f16	k__Bacteria; p__Bacteroidetes; c__Bacteroidia; o__Bacteroidales; f__Porphyromonadaceae; g__Porphyromonas; s__
22432f081c2b1b73f0cd1e1c716e3492	k__Bacteria; p__Actinobacteria; c__Actinobacteria; o__Actinomycetales; f__Corynebacteriaceae; g__Corynebacterium; s__
225a0ac3ef2ba44ff48f1f382efb86f2	k__Bacteria; p__Firmicutes; c__Clostridia; o__Clostridiales; f__Ruminococcaceae; g__Ruminococcus
225ba4e2b3d41f3f42a9ed2dc25544a4	k__Bacteria; p__Proteobacteria; c__Gammaproteobacteria; o__Pseudomonadales; f__Moraxellaceae; g__Acinetobacter; s__lwoffii
225c2919fc0b1314d4dcd9f65ca793dd	k__Bacteria; p__Proteobacteria; c__Alphaproteobacteria; o__Rhizobiales; f__Aurantimonadaceae; g__; s__
226ab97195d19858d059fffaef17f5d7	k__Bacteria; p__Firmicutes; c__Clostridia; o__Clostridiales; f__Lachnospiraceae
226bee1f9013e368934e67636f38c953	k__Bacteria; p__Firmicutes; c__Clostridia; o__Clostridiales; f__Peptostreptococcaceae; g__Peptostreptococcus; s__
226cbfb0b22f27e6c208b77f21936af1	k__Bacteria; p__Proteobacteria; c__Gammaproteobacteria; o__Xanthomonadales; f__Xanthomonadaceae; g__Pseudoxanthomonas; s__suwonensis
227262067d4e6d71cd179bc7f7a5d1c4	k__Bacteria; p__Firmicutes; c__Clostridia; o__Clostridiales; f__Lachnospiraceae; g__; s__
22907d450b79c927e4ffe34a2d09d2aa	k__Bacteria; p__Firmicutes; c__Clostridia; o__Clostridiales; f__Lachnospiraceae; g__[Ruminococcus]; s__gnavus
22a8ac407753f6cf28abc60820a2e2dc	k__Bacteria; p__Actinobacteria; c__Actinobacteria; o__Actinomycetales
22a95320d7e8ea57f29bd0c244a54167	k__Bacteria; p__Actinobacteria; c__Actinobacteria; o__Actinomycetales; f__Streptomycetaceae; g__Streptomyces
22b3c70cdfb1714224e1bf8a6314bee9	k__Bacteria; p__Firmicutes; c__Clostridia; o__Clostridiales; f__[Tissierellaceae]; g__Finegoldia; s__
22bf2bb8261d6fc474952516020f276f	k__Bacteria; p__[Thermi]; c__Deinococci; o__Deinococcales; f__Deinococcaceae; g__Deinococcus; s__
22cae8b7dd2b83fc7ca4204beeab28d6	k__Bacteria; p__Firmicutes; c__Clostridia; o__Clostridiales
22d16040e37320e7550f49b4dd62679d	k__Bacteria; p__Firmicutes; c__Clostridia; o__Clostridiales; f__Ruminococcaceae; g__Faecalibacterium; s__prausnitzii
22f1fa0bdcc19746dee080bcc12a1840	k__Bacteria; p__Proteobacteria; c__Alphaproteobacteria; o__Rickettsiales; f__mitochondria
22f2b58db64efd380458715b985c4989	k__Bacteria; p__Cyanobacteria; c__4C0d-2; o__MLE1-12; f__; g__; s__
2312925af7468a563d5cfadf020ed893	k__Bacteria; p__Bacteroidetes; c__Bacteroidia; o__Bacteroidales; f__Prevotellaceae; g__Prevotella; s__melaninogenica
2312fa68895be3d61975e48dda211263	k__Bacteria; p__Firmicutes; c__Clostridia; o__Clostridiales; f__Lachnospiraceae; g__Dorea; s__
23165c3b31db99038630a7a3530bb9d6	k__Bacteria; p__Firmicutes; c__Clostridia; o__Clostridiales; f__Dehalobacteriaceae; g__Dehalobacterium; s__
23176b0d224a85cab9385a426000544f	k__Bacteria; p__Firmicutes; c__Clostridia; o__Clostridiales
23194d2b7c5d9dadd6ac2f254c6586d1	k__Bacteria; p__Firmicutes; c__Clostridia; o__Clostridiales; f__Lachnospiraceae; g__[Ruminococcus]; s__gnavus
23462e39e31bf2d1bc4d7864ca01462b	k__Bacteria; p__Firmicutes; c__Clostridia; o__Clostridiales; f__; g__; s__
23493f2d8aeb3f0d9d8f2e9ccaf62b35	k__Bacteria; p__Chloroflexi; c__Thermomicrobia; o__JG30-KF-CM45; f__; g__; s__
235a3631d1cc01de1de9aa6fc9025300	k__Bacteria; p__Firmicutes; c__Clostridia; o__Clostridiales; f__[Mogibacteriaceae]; g__; s__
235d02ee646de232a65613645b74f34a	k__Bacteria; p__Firmicutes; c__Clostridia; o__Clostridiales; f__Ruminococcaceae
235e03a9a77bea7e5069116ccc050376	k__Bacteria; p__Firmicutes; c__Clostridia; o__Clostridiales; f__[Mogibacteriaceae]; g__; s__
236207d3aeb8402e902763e10a982ce8	k__Bacteria; p__Firmicutes; c__Clostridia; o__Clostridiales; f__Veillonellaceae; g__Sporomusa; s__polytropa
2385bc5e5f75a4f96e65bd8c3f04c066	k__Bacteria; p__Firmicutes; c__Clostridia; o__Clostridiales; f__Veillonellaceae; g__Megasphaera; s__
238865c1eee6226c618dd43596f6fe11	k__Bacteria; p__Firmicutes; c__Clostridia; o__Clostridiales; f__; g__; s__
238ba78516f666cb2b29854f9a5bb2eb	k__Bacteria; p__Actinobacteria; c__Actinobacteria; o__Actinomycetales; f__Microbacteriaceae; g__Leucobacter; s__
238e0fbcac917cbfa3de2e6c3e1241c8	k__Bacteria; p__Firmicutes; c__Clostridia; o__Clostridiales; f__Lachnospiraceae; g__; s__
239d683a96587cb8f6dd6673a9159e9c	k__Bacteria; p__Firmicutes; c__Clostridia; o__Clostridiales; f__Lachnospiraceae; g__Lachnoanaerobaculum; s__orale
23a15e42d4f833e012085f3597ab9c23	k__Bacteria; p__Actinobacteria; c__Thermoleophilia; o__Gaiellales; f__AK1AB1_02E; g__; s__
23bd044024010c3ba28e2542b98a22e1	k__Bacteria; p__Actinobacteria; c__Actinobacteria; o__Bifidobacteriales; f__Bifidobacteriaceae; g__Gardnerella; s__
23d2b093fc404105c92f8cf6901c95e6	k__Bacteria; p__Firmicutes; c__Clostridia; o__Clostridiales; f__Lachnospiraceae; g__; s__
24051ef88d0304b64d9d8f9b863126e6	k__Bacteria; p__Proteobacteria; c__Alphaproteobacteria; o__Rhizobiales; f__Rhizobiaceae; g__Shinella; s__granuli
240a30949d8516a7daf4fcc9ae9409a3	k__Bacteria; p__Firmicutes; c__Bacilli; o__Bacillales; f__Planococcaceae
241358149d169fe77c6d1070671e4264	k__Bacteria; p__Firmicutes; c__Clostridia; o__Clostridiales; f__Lachnospiraceae
241aeac7f791c85735c979ad78b01520	k__Bacteria; p__Firmicutes; c__Clostridia; o__Clostridiales; f__Ruminococcaceae; g__Ruminococcus; s__
2429729a67999c6d894f79ae85dd332a	k__Bacteria; p__Firmicutes; c__Clostridia; o__Clostridiales; f__; g__; s__
243c7e4974f5b05d075a63b3ed5a2279	k__Bacteria; p__Firmicutes; c__Clostridia; o__Clostridiales; f__; g__; s__
244b4f211e30c438c80296f0d6729dc4	k__Bacteria; p__Firmicutes; c__Clostridia; o__Clostridiales; f__Ruminococcaceae
244e1b2e567410beeaeeaaa017da4342	k__Bacteria; p__Firmicutes; c__Clostridia; o__Clostridiales
2452eb1fed287e1db5e6bd814ca73f60	k__Bacteria; p__Firmicutes; c__Clostridia; o__Clostridiales; f__Peptostreptococcaceae; g__Clostridium; s__venationis
245e00546277e7b79582f853caa3ed33	k__Bacteria; p__Firmicutes; c__Bacilli; o__Bacillales; f__Paenibacillaceae; g__; s__
247f8ea7244ac8a28a28ccdf2953b3b6	k__Bacteria; p__Firmicutes; c__Clostridia; o__Clostridiales; f__; g__; s__
2491b6fd794f93238622a0a4f4e586fb	k__Bacteria; p__Firmicutes; c__Clostridia; o__Clostridiales; f__Lachnospiraceae; g__[Ruminococcus]; s__gnavus
249bf501d807a86722ecfe4bb7f23d9b	k__Bacteria; p__Proteobacteria; c__Gammaproteobacteria; o__Pseudomonadales; f__Moraxellaceae; g__Moraxella; s__
24b9c3cbda71defd04f5bd1e98ce5f54	k__Bacteria; p__Firmicutes; c__Erysipelotrichi; o__Erysipelotrichales; f__Erysipelotrichaceae; g__; s__
24ea9b81f6378329c1948b308f2f94d9	k__Bacteria; p__Firmicutes; c__Clostridia; o__Clostridiales; f__; g__; s__
2504f5cc45cc7487136b0513ac32d94a	k__Bacteria; p__Firmicutes; c__Clostridia; o__Clostridiales; f__; g__; s__
250f7d6a29f12b5a6c5a2c49cea55fa8	k__Bacteria; p__Firmicutes; c__Clostridia; o__Clostridiales; f__Peptostreptococcaceae
25240cf11920110ed875b81f79634aee	k__Bacteria; p__Firmicutes; c__Clostridia; o__Clostridiales
25394a604bbcd078c80186b300dab8ee	k__Bacteria; p__Firmicutes; c__Erysipelotrichi; o__Erysipelotrichales; f__Erysipelotrichaceae; g__[Eubacterium]; s__biforme
25627f24d2890413d85df9acedfcdf52	k__Bacteria; p__Firmicutes; c__Clostridia; o__Clostridiales; f__Lachnospiraceae; g__; s__
25703a40d48e7622bb7498929623642e	k__Bacteria
25773d17c98ca4f1cbab85bb7a20ee07	k__Bacteria; p__Firmicutes; c__Erysipelotrichi; o__Erysipelotrichales; f__Erysipelotrichaceae; g__; s__
25829139369b016d9f0762d7e4ad7821	k__Bacteria; p__Firmicutes; c__Clostridia; o__Clostridiales; f__; g__; s__
25aac2bd01862422272446822761b417	k__Bacteria; p__Tenericutes; c__Mollicutes; o__RF39; f__; g__; s__
25abec9d5062b36ad1c1a37d48a0ccef	k__Bacteria; p__Firmicutes; c__Clostridia; o__Clostridiales; f__; g__; s__
25bcfeb1aabf86cc166ef2bf93d58ead	k__Bacteria; p__Firmicutes; c__Clostridia; o__Clostridiales; f__Lachnospiraceae; g__Catonella; s__
25bee06e9f26ee749b6bd48ef93b6a8e	k__Bacteria; p__Actinobacteria; c__Actinobacteria; o__Actinomycetales; f__Streptomycetaceae; g__Streptomyces
25c641a04c45947465ce370df006cdac	k__Bacteria; p__Proteobacteria; c__Alphaproteobacteria; o__Sphingomonadales; f__Sphingomonadaceae; g__Sphingomonas
25d1a18cb14a68584bcb4e50b215e84b	k__Bacteria; p__Firmicutes; c__Clostridia; o__Clostridiales; f__; g__; s__
25e72c6afa63389de530b8aa2e4f79b8	k__Bacteria; p__Firmicutes; c__Clostridia; o__Clostridiales; f__Lachnospiraceae; g__Dorea; s__
25eaaaae173c4a95142e5b4feb6bdae9	k__Bacteria; p__Firmicutes; c__Clostridia; o__Clostridiales; f__Lachnospiraceae; g__; s__
25f537c4856de1617e682de90caba215	k__Bacteria; p__Firmicutes; c__Clostridia; o__Clostridiales; f__Lachnospiraceae; g__; s__
25f6b09d9086796387b5d3b538f016f3	k__Bacteria; p__Firmicutes; c__Clostridia; o__Clostridiales; f__Ruminococcaceae; g__; s__
25fe23e989514e818f4bc1f680ad6da1	k__Bacteria; p__Firmicutes; c__Bacilli; o__Bacillales; f__[Exiguobacteraceae]; g__Exiguobacterium; s__
26005dfb7ad2e8cdbb139846af329663	k__Bacteria; p__Firmicutes; c__Bacilli; o__Bacillales
2606655cc236270d91a2efe6d02a7c32	k__Bacteria; p__Proteobacteria; c__Alphaproteobacteria; o__Rhodospirillales; f__Acetobacteraceae; g__Acidocella; s__
2625ec0c93631d7efce9d85a1ce807a9	k__Bacteria; p__Firmicutes; c__Bacilli; o__Lactobacillales; f__Aerococcaceae; g__Abiotrophia; s__
26334d0a7d608049d4b54baf3b7cdccf	k__Bacteria; p__Firmicutes; c__Clostridia; o__Clostridiales; f__; g__; s__
263e41ea2c25dc87bd2ff5910cf30d40	k__Bacteria; p__Firmicutes; c__Clostridia; o__Clostridiales; f__Lachnospiraceae; g__Roseburia; s__faecis
2643df73928bfd7b6861c66b591af84c	k__Bacteria; p__Firmicutes; c__Clostridia; o__Clostridiales; f__Lachnospiraceae; g__; s__
264513407115d40efcc8e075961040dd	k__Bacteria; p__Firmicutes; c__Clostridia; o__Clostridiales; f__Peptostreptococcaceae; g__; s__
264e289b9e0c6779eabf9772f7981d48	k__Bacteria; p__Firmicutes; c__Clostridia; o__Clostridiales; f__; g__; s__
2651fcbe627db13d2b8509eda4b053f8	k__Bacteria; p__Firmicutes; c__Bacilli; o__Lactobacillales; f__Aerococcaceae; g__Abiotrophia; s__
265db877b8d28ec4be074da88a846ec7	k__Bacteria; p__Firmicutes; c__Clostridia; o__Clostridiales
2678ed3808ef43759fe3dcf46f1b1a05	k__Bacteria; p__Firmicutes; c__Clostridia; o__Clostridiales; f__Lachnospiraceae; g__Coprococcus; s__
268bb4c58c715c42714e7963496eef47	k__Bacteria; p__Firmicutes; c__Clostridia; o__Clostridiales; f__Lachnospiraceae; g__[Ruminococcus]; s__gnavus
268ea55859eaf084aebcf15c7c4a48dd	k__Bacteria; p__Chloroflexi; c__Thermomicrobia; o__JG30-KF-CM45; f__; g__; s__
2699d96c2683e12fc7c9974695080688	k__Bacteria; p__Firmicutes; c__Clostridia; o__Clostridiales; f__Clostridiaceae; g__Clostridium; s__
26a8e0826f2dbff27992c331edf5cda0	k__Bacteria; p__Proteobacteria; c__Betaproteobacteria; o__Burkholderiales; f__Oxalobacteraceae; g__Ralstonia; s__
26b4b526e1e97e0a1322abc26264cfea	k__Bacteria; p__Actinobacteria; c__Actinobacteria; o__Actinomycetales; f__Streptomycetaceae
26c4fd06a165d0916ec3c7776f28ca20	k__Bacteria; p__Bacteroidetes; c__Bacteroidia; o__Bacteroidales; f__Prevotellaceae; g__Prevotella; s__
26c6e3ed14694582e207478c1f23c21f	k__Bacteria; p__Firmicutes; c__Bacilli; o__Turicibacterales; f__Turicibacteraceae; g__Turicibacter; s__
26d113eaa07d136e646b3129be197b2b	k__Bacteria; p__Firmicutes; c__Clostridia; o__Clostridiales; f__Ruminococcaceae; g__Faecalibacterium; s__prausnitzii
26d37a72a3916ec41992205cf4db70d1	k__Bacteria; p__Firmicutes; c__Clostridia; o__Clostridiales; f__Ruminococcaceae; g__Ruminococcus; s__
26d95f66b97240febac5d7976fe5ebaf	k__Bacteria; p__Firmicutes; c__Clostridia; o__Clostridiales; f__Lachnospiraceae; g__; s__
26e2a5b600a084aaa82eb03e68dde359	k__Bacteria; p__Firmicutes; c__Clostridia; o__Clostridiales; f__Ruminococcaceae
26ee5cc033fe90d66abb46599510136d	k__Bacteria; p__Firmicutes; c__Clostridia; o__Clostridiales; f__Ruminococcaceae; g__Oscillospira; s__
26f173c04574871aba8876838e2d9e61	k__Bacteria; p__Proteobacteria; c__Alphaproteobacteria; o__Sphingomonadales; f__Sphingomonadaceae; g__Novosphingobium; s__
26f642bbeedec85271f566061bf36342	k__Bacteria; p__Firmicutes; c__Bacilli; o__Bacillales; f__Bacillaceae; g__; s__
26f9b0fed771dc261560d0ed6f65f80a	k__Bacteria; p__Firmicutes; c__Clostridia; o__Clostridiales; f__Lachnospiraceae; g__Moryella; s__
26fbb9909a8f690e9b4fbee3a18eb931	k__Bacteria; p__Proteobacteria; c__Alphaproteobacteria; o__Rhizobiales; f__Methylobacteriaceae
270a745647e1f4f2daefddcae78b43c7	k__Bacteria; p__Firmicutes; c__Clostridia; o__Clostridiales; f__Lachnospiraceae
270ee43c679003fa735709cfbbcb6d88	k__Bacteria; p__Firmicutes; c__Clostridia; o__Clostridiales; f__[Tissierellaceae]; g__Anaerococcus; s__
2720e9a785340f1cbdf6ad0e23fd7af6	k__Bacteria; p__Proteobacteria; c__Alphaproteobacteria; o__Sphingomonadales; f__Sphingomonadaceae; g__Sphingomonas; s__
2721fd42d5373667f111c60faaf21eac	k__Bacteria; p__Actinobacteria; c__Actinobacteria; o__Actinomycetales; f__Micrococcaceae; g__Rothia; s__mucilaginosa
272b51c5b1f9f19f0623c2a53fe10be7	k__Bacteria; p__Tenericutes; c__Mollicutes; o__RF39; f__; g__; s__
2731291eb9fe61e22b2bfd5ecd539e89	k__Bacteria; p__Actinobacteria; c__Actinobacteria; o__Actinomycetales; f__Brevibacteriaceae; g__Brevibacterium; s__
2738d79c5973e0bd36077b620c9ec1ef	k__Bacteria; p__Actinobacteria; c__Actinobacteria; o__Actinomycetales; f__Brevibacteriaceae; g__Brevibacterium; s__
273fa0191072af3d33e32271b35c8f18	k__Bacteria; p__Firmicutes; c__Clostridia; o__Clostridiales; f__Ruminococcaceae; g__Oscillospira; s__
2743823e7602e70cfa467627e69d2774	k__Bacteria; p__Proteobacteria; c__Alphaproteobacteria; o__Rhizobiales; f__Rhizobiaceae; g__Rhizobium
2747bd94a19fbfa82f1e90e326d2f100	k__Bacteria; p__Firmicutes; c__Clostridia; o__Clostridiales; f__Clostridiaceae; g__Clostridium; s__
2763397cf04e86ebe1cf4e4eeae9581a	k__Bacteria; p__Firmicutes; c__Clostridia; o__Clostridiales; f__Ruminococcaceae; g__Oscillospira; s__
27a7197b6f932b622896bc3dc90f3200	k__Bacteria; p__Firmicutes; c__Clostridia; o__Clostridiales; f__Lachnospiraceae
27ac09432b451032fc4a97600a1050ce	k__Bacteria; p__Firmicutes; c__Clostridia; o__Clostridiales; f__; g__; s__
27b0bca5c048a9dfade9558dcf685681	k__Bacteria; p__Firmicutes; c__Clostridia; o__Clostridiales; f__; g__; s__
27b1b4759799b412764076e2bcd8ca89	k__Bacteria; p__Firmicutes; c__Clostridia; o__Clostridiales; f__; g__; s__
27b5f6540ea76a79015bbdddfc8c771c	k__Bacteria; p__Proteobacteria; c__Deltaproteobacteria; o__Myxococcales
27ccbc0c212b45eb46c3573174e1bd80	k__Bacteria; p__Firmicutes; c__Clostridia; o__Clostridiales; f__Ruminococcaceae; g__Oscillospira; s__
27ccfde7b056e4b6715073fe3263dc34	k__Bacteria; p__Firmicutes; c__Clostridia; o__Clostridiales; f__Lachnospiraceae; g__Coprococcus; s__
27d800e12e9525e0e2c47e13019b6e78	k__Bacteria; p__Firmicutes; c__Clostridia; o__Clostridiales; f__; g__; s__
27dad4ce828d133e6a685ba04e3276ac	k__Bacteria; p__Bacteroidetes; c__Bacteroidia; o__Bacteroidales; f__Prevotellaceae; g__Prevotella; s__melaninogenica
27ddfd1a16773ece682def91b8d49346	k__Bacteria; p__Firmicutes; c__Clostridia; o__Clostridiales; f__Ruminococcaceae; g__Ruminococcus; s__
27e4676f1762a0d4a81f759e38188c7d	k__Bacteria; p__Tenericutes; c__Mollicutes; o__RF39; f__; g__; s__
27e8a289c9a8d4275addcc845ed80112	k__Bacteria; p__Proteobacteria; c__Gammaproteobacteria; o__Legionellales; f__Coxiellaceae; g__Rickettsiella; s__
27f098662c8f87b4aaff903d9c0f28d3	k__Bacteria; p__Proteobacteria; c__Deltaproteobacteria; o__Desulfovibrionales; f__Desulfovibrionaceae; g__Bilophila; s__
27ff845fa8509138600337031271c71b	k__Bacteria; p__Proteobacteria; c__Gammaproteobacteria; o__Enterobacteriales; f__Enterobacteriaceae
2812352d3e2ea8d06896a3eda7c8cf92	k__Bacteria; p__Firmicutes; c__Bacilli; o__Bacillales; f__Paenibacillaceae; g__Paenibacillus; s__
2837dcce74501bc3a52e426613c7a0bb	k__Bacteria; p__Firmicutes; c__Clostridia; o__Clostridiales; f__Ruminococcaceae; g__Ruminococcus; s__
283a046aad93abb0ea9ed72e7e72c5c1	k__Bacteria; p__Tenericutes; c__Mollicutes; o__RF39; f__; g__; s__
283fbda88937bcb5281d9d201f12780e	k__Bacteria; p__Bacteroidetes; c__Bacteroidia; o__Bacteroidales; f__Prevotellaceae; g__Prevotella; s__pallens
2840aa7c99b9c4802e3028d876307acc	k__Bacteria; p__Firmicutes; c__Clostridia; o__Clostridiales; f__Ruminococcaceae; g__Gemmiger; s__formicilis
2845a1589f08442d5035388090aacb5a	k__Bacteria; p__Proteobacteria; c__Gammaproteobacteria; o__Pseudomonadales; f__Pseudomonadaceae; g__Pseudomonas; s__
286cbdff7002fba408d31c1be9302a80	k__Bacteria; p__Firmicutes; c__Clostridia; o__Clostridiales; f__Lachnospiraceae; g__Coprococcus; s__
287143c2a88f3c08ce9b8fe885c6772e	k__Bacteria; p__Tenericutes; c__Mollicutes; o__RF39; f__; g__; s__
289b571d713622f7b2b26a50cd993c15	k__Bacteria; p__Firmicutes; c__Clostridia; o__Clostridiales; f__Lachnospiraceae; g__[Ruminococcus]; s__gnavus
28a1f5532f9e2e66da474c3d8687991e	k__Bacteria; p__Proteobacteria; c__Betaproteobacteria; o__Burkholderiales; f__Burkholderiaceae; g__Burkholderia; s__bryophila
28bbe21c1c20d8cfe0bd2f9ab935fe83	k__Bacteria; p__Firmicutes; c__Bacilli; o__Bacillales; f__Paenibacillaceae; g__Cohnella; s__
28d7af7dc685999c0d9fc48babb5e7c3	k__Bacteria; p__Bacteroidetes; c__Bacteroidia; o__Bacteroidales; f__Prevotellaceae; g__Prevotella; s__
28ed1572d21b86c5412e3d1990c07269	k__Bacteria; p__Bacteroidetes; c__[Saprospirae]; o__[Saprospirales]; f__Chitinophagaceae; g__Flavihumibacter; s__
28f40d53329712ce4db640453b55ec03	k__Bacteria; p__Firmicutes; c__Clostridia; o__Clostridiales; f__; g__; s__
28fc5b4c98e618c2d8b58303c777ae23	k__Bacteria; p__Actinobacteria; c__Actinobacteria; o__Actinomycetales; f__Microbacteriaceae; g__Cryocola; s__
290c4a7506ca5293e98782efa267c78a	k__Bacteria; p__Actinobacteria; c__Nitriliruptoria; o__Euzebyales; f__Euzebyaceae; g__Euzebya; s__
29115e7bd8ef43044853d0193cf6f622	k__Bacteria; p__Actinobacteria; c__Actinobacteria; o__Actinomycetales; f__Mycobacteriaceae; g__Mycobacterium; s__
29138539ab2242a3bd73b623c9bd0c6a	k__Bacteria; p__Firmicutes; c__Clostridia; o__Clostridiales; f__; g__; s__
2920a924903abc8c8f25b5d8f079871e	k__Bacteria; p__Bacteroidetes; c__Bacteroidia; o__Bacteroidales; f__[Paraprevotellaceae]; g__CF231; s__
2933be383c0c84ca8bc91a88b2574711	k__Bacteria; p__Firmicutes; c__Clostridia; o__OPB54; f__; g__; s__
294439019add4f19e8d5d95d40921207	k__Bacteria; p__Firmicutes; c__Clostridia; o__Clostridiales; f__Lachnospiraceae; g__[Ruminococcus]; s__gnavus
294aa1b8153137dfef7a678ac151d6c4	k__Bacteria; p__Actinobacteria; c__Actinobacteria; o__Actinomycetales; f__Actinosynnemataceae
294bc55c9b6e5b71573011d65174aafb	k__Bacteria; p__Cyanobacteria; c__Chloroplast; o__Streptophyta; f__; g__; s__
2965eec8e190e9f6966ff1913bb643ab	k__Bacteria; p__[Thermi]; c__Deinococci; o__Thermales; f__Thermaceae; g__Thermus; s__
29b5953db5493e5eb4d63ebd367739bc	k__Bacteria; p__Firmicutes; c__Clostridia; o__Clostridiales
29cf31b34bc2ab0425b8a30b0a86c5f3	k__Bacteria; p__Firmicutes; c__Clostridia; o__Clostridiales; f__; g__; s__
29d5d2ccc1dc365c32c8f37b4bba358f	k__Bacteria; p__Actinobacteria; c__Actinobacteria; o__Actinomycetales; f__Corynebacteriaceae; g__Corynebacterium; s__
29da298dfcf2a5fb2a87f8d2129f3013	k__Bacteria; p__Proteobacteria; c__Gammaproteobacteria; o__Pseudomonadales; f__Moraxellaceae; g__Acinetobacter; s__johnsonii
29daaf94c6c9c41e5044aa321d18a306	k__Bacteria; p__Firmicutes; c__Bacilli; o__Lactobacillales; f__Lactobacillaceae; g__Lactobacillus; s__zeae
29de1ff9a9d9f9b1e29a36106694ee27	k__Bacteria; p__Firmicutes; c__Erysipelotrichi; o__Erysipelotrichales; f__Erysipelotrichaceae; g__; s__
29dfd7e4fdd97bc3c69557fa129417b9	k__Bacteria; p__Firmicutes; c__Clostridia; o__Clostridiales; f__Clostridiaceae; g__Clostridium; s__
29f242efe797d95ae64a7861b1871594	k__Bacteria; p__Tenericutes; c__Mollicutes; o__RF39; f__; g__; s__
29fbc7e5021229480248fa7466a499a2	k__Bacteria; p__Firmicutes; c__Bacilli; o__Lactobacillales; f__Aerococcaceae; g__Abiotrophia; s__
2a010845597b5b6c3ef87653261a46ec	k__Bacteria; p__Firmicutes; c__Bacilli; o__Lactobacillales; f__Aerococcaceae; g__Alloiococcus; s__
2a0bec32d0658b9e3781ca6149c2600b	k__Bacteria; p__Bacteroidetes; c__Bacteroidia; o__Bacteroidales; f__Rikenellaceae; g__; s__
2a28b809c89256bc463bcd26795cab4e	k__Bacteria; p__Firmicutes; c__Clostridia; o__Clostridiales; f__; g__; s__
2a3cf9dded0982d114dcf2987df8cac9	k__Bacteria; p__Actinobacteria; c__Actinobacteria; o__Actinomycetales; f__Streptomycetaceae; g__Streptomyces; s__
2a3d1e7fd267834540fa3f771847435c	k__Bacteria; p__Proteobacteria; c__Gammaproteobacteria; o__Enterobacteriales; f__Enterobacteriaceae
2a4dd1a4a16b56fabef4b909680fe193	k__Bacteria; p__Firmicutes; c__Clostridia; o__Clostridiales; f__Lachnospiraceae
2a4fadeadf9bd0e9112b49223618a74e	k__Bacteria; p__Firmicutes; c__Bacilli; o__Bacillales; f__Planococcaceae; g__Ureibacillus; s__
2a6d7954d4a2df5decf7af6bb6774f80	k__Bacteria; p__Actinobacteria; c__Actinobacteria; o__Actinomycetales; f__Microbacteriaceae
2a89717b521dc276ae1bd08090909dc4	k__Bacteria; p__Firmicutes; c__Clostridia; o__Clostridiales; f__Ruminococcaceae; g__Ruminococcus; s__
2ac8802dc104fe104c33f482ca814d08	k__Bacteria; p__Actinobacteria; c__Actinobacteria; o__Actinomycetales; f__Nocardiopsaceae
2ad01733c28374d9dec8b8b8957c617f	k__Bacteria; p__Chloroflexi; c__TK10
2adb243232074258a0548f2c4908d358	k__Bacteria; p__Firmicutes; c__Clostridia; o__Clostridiales; f__Veillonellaceae; g__Sporomusa; s__
2af77045a323a1e8e635d4d6e24c871c	k__Bacteria; p__Firmicutes; c__Erysipelotrichi; o__Erysipelotrichales; f__Erysipelotrichaceae; g__; s__
2b0930f88f47e2f63590d6e97d73ed0c	k__Bacteria; p__Proteobacteria; c__Alphaproteobacteria; o__Rhizobiales; f__Hyphomicrobiaceae; g__Devosia; s__
2b0e10497254a91e1d3514eafd05cb64	k__Bacteria; p__Proteobacteria; c__Betaproteobacteria; o__Neisseriales; f__Neisseriaceae; g__Neisseria
2b1d953177110251cc779ff1551846c8	k__Bacteria; p__Fusobacteria; c__Fusobacteriia; o__Fusobacteriales; f__Fusobacteriaceae; g__Fusobacterium; s__
2b33752353804e5616919765189fded9	k__Bacteria; p__Firmicutes; c__Clostridia; o__Clostridiales; f__Lachnospiraceae; g__; s__
2b463ae21aa48a37b81775a3297020a8	k__Bacteria; p__Firmicutes; c__Bacilli; o__Bacillales; f__Paenibacillaceae; g__; s__
2b65502eb5eab86d4805daeb7925c7d1	k__Bacteria; p__Verrucomicrobia; c__[Spartobacteria]; o__[Chthoniobacterales]; f__[Chthoniobacteraceae]
2b70763729c0c5f330bd2e729851a74c	k__Bacteria; p__Firmicutes; c__Bacilli; o__Lactobacillales; f__Leuconostocaceae; g__Weissella; s__
2b869347e522205f1c4a919196e6b45b	k__Bacteria; p__Fusobacteria; c__Fusobacteriia; o__Fusobacteriales; f__Leptotrichiaceae; g__Leptotrichia; s__
2b871a4b047d73093255fa765a5b363e	k__Bacteria; p__Tenericutes; c__Mollicutes; o__RF39; f__; g__; s__
2b90532f7b4cc2c26abd0f1f1657f80b	k__Bacteria; p__Firmicutes; c__Clostridia; o__Clostridiales; f__; g__; s__
2b95cbc8bf5a91b3f86257d9f379b047	k__Bacteria; p__Firmicutes; c__Clostridia; o__Clostridiales; f__; g__; s__
2ba3c3f973675e2b68b7a7daaf02412d	k__Bacteria; p__Firmicutes; c__Clostridia; o__Clostridiales; f__Lachnospiraceae; g__Blautia; s__producta
2ba72222db2ede1557474ad10c015601	k__Bacteria; p__Proteobacteria; c__Betaproteobacteria; o__Neisseriales; f__Neisseriaceae; g__Neisseria
2bbecb44f63367dddd22487b31fb0f68	k__Bacteria; p__Firmicutes; c__Clostridia; o__Clostridiales; f__Lachnospiraceae; g__Oribacterium; s__
2bd5e1857ce4f841e0d45aa27ea09fa4	k__Bacteria; p__Firmicutes; c__Clostridia; o__Clostridiales; f__; g__; s__
2bd9309f2f97cae51d18d06ea1ca519a	k__Bacteria; p__Firmicutes; c__Bacilli; o__Lactobacillales; f__Carnobacteriaceae; g__Granulicatella; s__
2bdf632320973fdb41ce7e62598691e7	k__Bacteria; p__Firmicutes; c__Bacilli; o__Bacillales; f__Staphylococcaceae; g__Staphylococcus; s__pettenkoferi
2be276ec24f8c167aee73c4d8b8b971e	k__Bacteria; p__Firmicutes; c__Clostridia; o__Clostridiales; f__; g__; s__
2bfd220284f4208a729f67f3f6f073c3	k__Bacteria; p__Firmicutes; c__Clostridia; o__Clostridiales; f__Lachnospiraceae; g__; s__
2c064ac1dddc6cb98a5ca584a68647f8	k__Bacteria; p__Firmicutes; c__Clostridia; o__Clostridiales
2c0c62ea09b2efe01bacdcbcf558d2b8	k__Bacteria; p__Firmicutes; c__Clostridia; o__Clostridiales; f__Lachnospiraceae; g__; s__
2c16378eb83fb581fa19dc7850ef14e4	k__Bacteria; p__Firmicutes; c__Bacilli; o__Bacillales; f__Paenibacillaceae; g__Paenibacillus; s__macerans
2c4f47324f26824751c94a63a05c0d94	k__Bacteria; p__Firmicutes; c__Clostridia; o__Clostridiales; f__; g__; s__
2c50a6eb6c24a9cb0c59de81a17d66eb	k__Bacteria; p__Tenericutes; c__Mollicutes; o__RF39; f__; g__; s__
2c6a6015a325f35c1a5c8ce7a44a5e3c	k__Bacteria; p__Firmicutes; c__Bacilli; o__Lactobacillales; f__Lactobacillaceae; g__Lactobacillus; s__zeae
2c7efa525978394c9636e181c5f282d3	k__Bacteria; p__Firmicutes; c__Clostridia; o__Clostridiales; f__Veillonellaceae; g__Anaerospora; s__hongkongensis
2c982937754e6321f861027032db80f7	k__Bacteria; p__Bacteroidetes; c__Bacteroidia; o__Bacteroidales; f__Bacteroidaceae; g__Bacteroides; s__fragilis
2cc48a1933a671b087ef58c7b186d55f	k__Bacteria; p__Tenericutes; c__Mollicutes; o__RF39; f__; g__; s__
2ce88e05f1919882b01289628bd3d156	k__Bacteria; p__Firmicutes; c__Clostridia; o__Clostridiales; f__; g__; s__
2cf0267a31dc6f1b8ee65c913b8f6e4d	k__Bacteria; p__Firmicutes; c__Clostridia; o__Clostridiales; f__; g__; s__
2cf58749b8e4456e12ab5347b1711196	k__Bacteria; p__Firmicutes; c__Clostridia; o__Clostridiales; f__Lachnospiraceae; g__Coprococcus; s__
2cf65760e23f3aa5b426a96fc16d6986	k__Bacteria; p__Proteobacteria; c__Alphaproteobacteria; o__Rhizobiales; f__Hyphomicrobiaceae; g__Devosia; s__
2d00e465ad18c4731ecf9573550ac73f	k__Bacteria; p__Proteobacteria; c__Alphaproteobacteria; o__Sphingomonadales; f__Sphingomonadaceae; g__Novosphingobium; s__capsulatum
2d013222bdad87d700468c20088bfd9f	k__Bacteria; p__Firmicutes; c__Clostridia; o__Clostridiales; f__Clostridiaceae; g__; s__
2d01d21dc12ee96d173b6ab4e83f9a3b	k__Bacteria; p__Firmicutes; c__Clostridia; o__Clostridiales; f__Lachnospiraceae; g__; s__
2d0bb6d60955af65d5015fb0453df272	k__Bacteria; p__Firmicutes; c__Clostridia; o__Clostridiales; f__Lachnospiraceae; g__Coprococcus; s__
2d12e22c058f6a1822a86b72e6274d05	k__Bacteria; p__Bacteroidetes; c__Bacteroidia; o__Bacteroidales; f__Prevotellaceae; g__Prevotella; s__
2d17e6750f9f7699c15471ec75d27222	k__Bacteria; p__Tenericutes; c__Mollicutes; o__RF39; f__; g__; s__
2d27fe5571b5aec87548e02e2cc8dad8	k__Bacteria; p__Actinobacteria; c__Actinobacteria; o__Actinomycetales; f__Dermacoccaceae; g__Dermacoccus; s__
2d605971077b9aac622283cd5e8f7a0d	k__Bacteria; p__Fusobacteria; c__Fusobacteriia; o__Fusobacteriales; f__Leptotrichiaceae; g__Leptotrichia; s__
2d68fe60bfba9823f6db9a580e3435cd	k__Bacteria; p__Proteobacteria; c__Alphaproteobacteria; o__Rhizobiales; f__Hyphomicrobiaceae; g__Devosia; s__
2d81857d726f45b2ca0e17c7bbdd99f9	k__Bacteria; p__Actinobacteria; c__Actinobacteria; o__Actinomycetales; f__Micrococcaceae; g__Rothia; s__mucilaginosa
2dc314a2adbf51f43d831b74f449dc8a	k__Bacteria; p__Proteobacteria; c__Gammaproteobacteria; o__Xanthomonadales; f__Xanthomonadaceae; g__Dyella; s__japonica
2dcd5e3ebedeb3d6cfd684d0d67ccb51	k__Bacteria; p__Actinobacteria; c__Actinobacteria; o__Actinomycetales; f__Actinomycetaceae; g__Actinomyces; s__
2de0f958e30d26f04cba8d2a920bbe46	k__Bacteria; p__Firmicutes; c__Clostridia; o__Clostridiales; f__Lachnospiraceae; g__Blautia; s__
2df371c65a7a3622b70415bd07c4081f	k__Bacteria; p__Firmicutes; c__Clostridia; o__Clostridiales; f__Lachnospiraceae; g__Oribacterium; s__
2dfc021ab6895ae3b4c956d50052f17e	k__Bacteria; p__Firmicutes; c__Clostridia; o__Clostridiales; f__Ruminococcaceae; g__Oscillospira; s__
2dfd502d0f918b6886c8da3a5ecfacab	k__Bacteria; p__Firmicutes; c__Clostridia; o__Clostridiales; f__Clostridiaceae; g__Clostridium; s__
2e2d8bc6b253139535ac923c91ce7888	k__Bacteria; p__Firmicutes; c__Clostridia; o__Clostridiales; f__Ruminococcaceae; g__; s__
2e4598ad0fdbf190ce69fb1b9a9e927f	k__Bacteria; p__Bacteroidetes; c__Bacteroidia; o__Bacteroidales; f__Prevotellaceae; g__Prevotella; s__pallens
2e4f2b53b856c4def6d021d01f5abb70	k__Bacteria; p__Firmicutes; c__Clostridia; o__Clostridiales; f__Lachnospiraceae; g__[Ruminococcus]; s__gnavus
2e514008cd4f14405aa436be15c5948b	k__Bacteria; p__TM6; c__SJA-4; o__; f__; g__; s__
2e59011b0452ad60c2610f6b296d000b	k__Bacteria; p__Actinobacteria; c__Actinobacteria; o__Actinomycetales; f__Actinomycetaceae; g__Actinomyces; s__
2e59793e7365713081c01af98b61612d	k__Bacteria; p__Proteobacteria; c__Betaproteobacteria; o__Methylophilales; f__Methylophilaceae; g__Methylotenera; s__mobilis
2e7dda16afecd9647cc9bbc1ab18b86a	k__Bacteria; p__Firmicutes; c__Clostridia; o__Clostridiales; f__; g__; s__
2e7fc5ed5cc21f87f004667bda3e4ea2	k__Bacteria; p__Firmicutes; c__Clostridia; o__Clostridiales; f__; g__; s__
2e840f3c81adf5b2aa989cf48d95d6e7	k__Bacteria; p__Firmicutes; c__Clostridia; o__Clostridiales; f__; g__; s__
2e983e8960314d9963cb073f5813ac40	k__Bacteria; p__Proteobacteria; c__Gammaproteobacteria; o__Xanthomonadales; f__Xanthomonadaceae; g__Dyella
2ea26e0303d0f3e04ca5ab834f30182a	k__Bacteria; p__Tenericutes; c__Mollicutes; o__RF39; f__; g__; s__
2eac818509611cc64e6d24fe7a4f3332	k__Bacteria; p__Firmicutes; c__Clostridia; o__Clostridiales; f__Ruminococcaceae; g__Butyricicoccus; s__pullicaecorum
2ead969d237d97c12d2e10f9ab71fbf2	k__Bacteria; p__Firmicutes; c__Clostridia; o__Clostridiales; f__Lachnospiraceae; g__Oribacterium; s__
2ed911df464d4e5e27aa5778be174d50	k__Bacteria; p__Proteobacteria; c__Betaproteobacteria; o__Burkholderiales; f__Burkholderiaceae; g__Burkholderia; s__bryophila
2ee057579a4ab9d530055bfebade5127	k__Bacteria; p__Firmicutes; c__Clostridia; o__Clostridiales; f__; g__; s__
2eed4f36d59859eb40a3d91594567b1a	k__Bacteria; p__Proteobacteria; c__Alphaproteobacteria; o__Sphingomonadales; f__Sphingomonadaceae; g__Sphingomonas
2ef1e51ab1cf99a3c6417b05a060830e	k__Bacteria; p__Firmicutes; c__Bacilli; o__Lactobacillales; f__Lactobacillaceae; g__Lactobacillus
2ef206979b52ebbc334674eaf7563fd1	k__Bacteria
2f07fdf96ba353d1fff72c6330a6a451	k__Bacteria; p__Firmicutes; c__Clostridia; o__Clostridiales; f__Lachnospiraceae; g__[Ruminococcus]; s__gnavus
2f09a4e09a7a0c93f284e4befec9975f	k__Bacteria; p__Actinobacteria; c__Coriobacteriia; o__Coriobacteriales; f__Coriobacteriaceae; g__; s__
2f138d46738514887879f184e02b6cc3	k__Bacteria; p__Firmicutes; c__Clostridia; o__Clostridiales; f__; g__; s__
2f1cd40b9abe5610726e33bf24f3b98c	k__Bacteria; p__Actinobacteria; c__Actinobacteria; o__Actinomycetales; f__Micrococcaceae; g__Nesterenkonia; s__
2f358685eedb3497523c8b9156b6ef71	k__Bacteria; p__Firmicutes; c__Clostridia; o__Clostridiales; f__Lachnospiraceae; g__; s__
2f38713af6dbed30ebf9709d2d9aaa5e	k__Bacteria; p__Firmicutes; c__Clostridia; o__Clostridiales
2f38f39001cfda87b7b72e0684a07881	k__Bacteria; p__Firmicutes; c__Bacilli; o__Bacillales; f__Paenibacillaceae; g__Paenibacillus; s__
2f3da68606254b35e1d68615524c6815	k__Bacteria; p__Bacteroidetes; c__Flavobacteriia; o__Flavobacteriales; f__Flavobacteriaceae; g__Capnocytophaga; s__
2f4428a286350cd12b9a8362dc50b7db	k__Bacteria; p__[Thermi]; c__Deinococci; o__Thermales; f__Thermaceae; g__Meiothermus; s__
2f45ca3a53dec4011372da36becfa5b3	k__Bacteria; p__Bacteroidetes; c__Bacteroidia; o__Bacteroidales; f__[Paraprevotellaceae]; g__[Prevotella]; s__
2f49affea1aa1db3f453ce4b3066a63f	k__Bacteria; p__Actinobacteria; c__Actinobacteria; o__Actinomycetales; f__Brevibacteriaceae; g__Brevibacterium; s__paucivorans
2f49e306f8a5c47bdd3447d04c2c9f29	k__Bacteria; p__Tenericutes; c__Mollicutes; o__RF39; f__; g__; s__
2f613f086b32cfde3f9f173f2f36c2eb	k__Bacteria; p__Firmicutes; c__Clostridia; o__Clostridiales; f__Ruminococcaceae; g__Ruminococcus; s__
2f7c5d4c9bf5ccb9ffb9bf3d22148e10	k__Bacteria; p__Proteobacteria; c__Alphaproteobacteria; o__Rhodobacterales; f__Rhodobacteraceae; g__Rhodobacter; s__
2f8ad27d452814a203145cd1d37d0a9e	k__Bacteria; p__Firmicutes; c__Clostridia; o__Clostridiales; f__Lachnospiraceae; g__[Ruminococcus]; s__gnavus
2f8ad4365632e4a05d8897ac4ee70b3a	k__Bacteria; p__Firmicutes; c__Bacilli; o__Lactobacillales; f__Lactobacillaceae; g__Lactobacillus; s__reuteri
2f9debdc2f608d4fa72dc101df2be359	k__Bacteria; p__Firmicutes; c__Clostridia; o__Clostridiales; f__; g__; s__
2fa3c34b61a7f82a73620d414160de94	k__Bacteria; p__Proteobacteria; c__Gammaproteobacteria; o__Pseudomonadales; f__Pseudomonadaceae; g__Pseudomonas
2fb58dd60f0ec40f435a9582d9db784b	k__Bacteria; p__Firmicutes; c__Bacilli; o__Turicibacterales; f__Turicibacteraceae; g__Turicibacter; s__
2ffafb32ffcea62cea4d2345f2b96315	k__Bacteria; p__Firmicutes; c__Clostridia; o__Clostridiales; f__Lachnospiraceae; g__; s__
300008a1a7596bfd6218f3c1bd68aae8	k__Bacteria; p__Bacteroidetes; c__Bacteroidia; o__Bacteroidales; f__Prevotellaceae; g__Prevotella; s__pallens
300568e1ddcb6356519af1a75ab2df4b	k__Bacteria; p__Firmicutes; c__Clostridia; o__Clostridiales; f__[Mogibacteriaceae]; g__Mogibacterium; s__
303fc5ca9864033a92a5360e445c8593	k__Bacteria; p__Firmicutes; c__Bacilli; o__Bacillales
304a8d1fb0f5543cf1c23064bfe3691c	k__Bacteria; p__Firmicutes; c__Clostridia; o__Clostridiales; f__[Tissierellaceae]; g__Anaerococcus; s__
304caabaff2be2bbce24b87640bfb9fa	k__Bacteria; p__Firmicutes; c__Clostridia; o__Clostridiales; f__Lachnospiraceae; g__; s__
305323d8018308880c026fca233036ef	k__Bacteria; p__Firmicutes; c__Clostridia; o__Clostridiales; f__Lachnospiraceae; g__Oribacterium; s__
30598f0d14cb4af2c3150ebb17667b95	k__Bacteria; p__Firmicutes; c__Clostridia; o__Clostridiales; f__; g__; s__
3069de0ecff827bb89750e22709fca02	k__Bacteria; p__Firmicutes; c__Clostridia; o__Clostridiales; f__Lachnospiraceae; g__; s__
3113212f52f5b548a4422e851980d96b	k__Bacteria; p__Bacteroidetes; c__Bacteroidia; o__Bacteroidales; f__Porphyromonadaceae; g__Porphyromonas; s__endodontalis
31175682ecddf94b762bb23e6acdb1a0	k__Bacteria; p__Proteobacteria; c__Gammaproteobacteria; o__Pasteurellales; f__Pasteurellaceae; g__Haemophilus; s__parainfluenzae
3117a768650322731ed419fc43887c2d	k__Bacteria; p__Firmicutes; c__Bacilli; o__Bacillales; f__Paenibacillaceae; g__Paenibacillus; s__
3120660c883750285d85c12f7d898f67	k__Bacteria; p__Firmicutes; c__Clostridia; o__Clostridiales; f__Ruminococcaceae; g__Oscillospira; s__
31217980cfdf305668ba9c8482a34e81	k__Bacteria; p__Firmicutes; c__Clostridia; o__Clostridiales; f__Lachnospiraceae; g__; s__
312afe1b6f05e28430cdc9bb39465ea5	k__Bacteria; p__Firmicutes; c__Clostridia; o__OPB54; f__; g__; s__
3147e7f6d3fedab3678a1e7787a99f84	k__Bacteria; p__Tenericutes; c__Mollicutes; o__RF39; f__; g__; s__
314a4f6f401e628c611af752a2329909	k__Bacteria; p__Actinobacteria; c__Coriobacteriia; o__Coriobacteriales; f__Coriobacteriaceae; g__Atopobium; s__
315ca0a729f126b941ba111a16d4d97a	k__Bacteria; p__Actinobacteria; c__Actinobacteria; o__Bifidobacteriales; f__Bifidobacteriaceae; g__Bifidobacterium; s__
31774b2ab198d7b5abc9f0d6e8a5ffc2	k__Bacteria; p__Proteobacteria; c__Deltaproteobacteria; o__Desulfovibrionales; f__Desulfovibrionaceae; g__Bilophila; s__
318bc3060f31cc2bdce38268df1fafb1	k__Bacteria; p__Firmicutes; c__Clostridia; o__Clostridiales; f__Clostridiaceae; g__Clostridium; s__butyricum
3192e6be7648191de8373c71188404ef	k__Bacteria; p__Firmicutes; c__Clostridia; o__Clostridiales; f__Peptostreptococcaceae; g__; s__
3192f0892c08ec282493637f4fa28d60	k__Bacteria; p__Firmicutes; c__Clostridia; o__Clostridiales; f__[Mogibacteriaceae]
31ae90207edd94c7ec56db3a9778c2e7	k__Bacteria; p__Bacteroidetes; c__Bacteroidia; o__Bacteroidales; f__Prevotellaceae; g__Prevotella; s__
31f8e3b704d4ebbbebaf97519239c83f	k__Bacteria; p__Firmicutes; c__Bacilli; o__Bacillales; f__; g__; s__
31fee2d7569d87893cd29ce493bf297e	k__Bacteria; p__Proteobacteria; c__Betaproteobacteria; o__Burkholderiales; f__Burkholderiaceae; g__Burkholderia; s__andropogonis
320c11ccf887c9106ddd7ffa3cfc9fbb	k__Bacteria; p__Firmicutes; c__Clostridia; o__Clostridiales; f__[Tissierellaceae]; g__Anaerococcus; s__
3219af75ee8056ed06ba81e873b0d0cb	k__Bacteria; p__Firmicutes; c__Clostridia; o__Clostridiales; f__Ruminococcaceae; g__Oscillospira; s__
324a68faea87d16c8e64abc6856e10e5	k__Bacteria; p__Firmicutes; c__Clostridia; o__Clostridiales; f__Lachnospiraceae; g__Coprococcus; s__
325ce268c8bbe026198a5ca3dbaad5b9	k__Bacteria; p__Firmicutes; c__Clostridia; o__Clostridiales
3263314beb6c746dee12289193181815	k__Bacteria; p__Actinobacteria; c__Actinobacteria; o__Actinomycetales; f__Micrococcaceae; g__Nesterenkonia; s__
3278b9ced954d4e2692c6c183e62c0d2	k__Bacteria; p__Firmicutes; c__Bacilli; o__Bacillales; f__Staphylococcaceae; g__Staphylococcus; s__sciuri
32851c9e05d7bb94d63c568c26ea7e6f	k__Bacteria; p__Proteobacteria; c__Alphaproteobacteria; o__Sphingomonadales; f__Sphingomonadaceae
32cc17e12d08b4011ab0ec8c393fd12c	k__Bacteria; p__Firmicutes; c__Clostridia; o__Clostridiales; f__Ruminococcaceae; g__Oscillospira; s__
32cd36db3b176689d81c65ddb6c17140	k__Bacteria; p__Firmicutes; c__Clostridia; o__Clostridiales; f__Ruminococcaceae; g__Oscillospira
32d73705d9905b9b3272894f5a0d9a9b	k__Bacteria; p__Firmicutes; c__Bacilli; o__Lactobacillales; f__Aerococcaceae; g__Alloiococcus; s__
32da977c2207ef70c7b586f07f095c89	k__Bacteria; p__Bacteroidetes; c__Bacteroidia; o__Bacteroidales; f__Bacteroidaceae; g__Bacteroides; s__
32e93d0353a0dabafa605aa62e349606	k__Bacteria; p__Firmicutes; c__Clostridia; o__Clostridiales; f__; g__; s__
32f222c2f775823e49d09d18299bf6da	k__Bacteria; p__Firmicutes; c__Clostridia; o__Clostridiales; f__Peptococcaceae; g__; s__
32f2797c8c324c3fc285d4a358fd0dbc	k__Bacteria; p__Proteobacteria; c__Alphaproteobacteria; o__Sphingomonadales; f__Sphingomonadaceae; g__Novosphingobium; s__resinovorum
32f8fd11d2bee278d609a1d4ab767554	k__Bacteria; p__Bacteroidetes; c__Bacteroidia; o__Bacteroidales; f__Prevotellaceae; g__Prevotella; s__melaninogenica
330fe19b29e2431eb1166e87ef3aaefa	k__Bacteria; p__Firmicutes; c__Bacilli; o__Bacillales; f__Paenibacillaceae; g__Paenibacillus; s__barengoltzii
33295f1846cff2bf9c88e15798fbc91d	k__Bacteria; p__Firmicutes; c__Bacilli; o__Bacillales; f__Bacillaceae; g__Anoxybacillus
332a6411ff00b4010ac2397f504c4695	k__Bacteria; p__Bacteroidetes; c__Bacteroidia; o__Bacteroidales; f__Rikenellaceae; g__Alistipes; s__putredinis
332bbeec07f22bf997f2131932c32e0c	k__Bacteria; p__Firmicutes; c__Clostridia; o__Clostridiales; f__[Tissierellaceae]; g__Sedimentibacter; s__
333bbf9224442fc10cd497377d2b1d01	k__Bacteria; p__Bacteroidetes; c__Bacteroidia; o__Bacteroidales; f__Bacteroidaceae; g__Bacteroides; s__uniformis
33518e48b174ac428cb7be1a216c6c6e	k__Bacteria; p__Firmicutes; c__Clostridia; o__Clostridiales; f__Lachnospiraceae; g__Coprococcus; s__
3364e852d30670d1c28639fa3adf2403	k__Bacteria; p__Bacteroidetes; c__Bacteroidia; o__Bacteroidales; f__[Odoribacteraceae]; g__Odoribacter; s__
3368b89b52cc773087fd1ce745f5dcc3	k__Bacteria; p__Bacteroidetes; c__Bacteroidia; o__Bacteroidales; f__Porphyromonadaceae; g__Parabacteroides; s__
33700a51fb7b7433681a143d70b3ab77	k__Bacteria; p__Firmicutes; c__Clostridia; o__Clostridiales; f__; g__; s__
3373b736096248c6eadeace44a0025ae	k__Bacteria; p__Actinobacteria; c__Actinobacteria; o__Bifidobacteriales; f__Bifidobacteriaceae; g__Bifidobacterium; s__animalis
337fe99fc52f0e102994ed721dddf577	k__Bacteria; p__Firmicutes; c__Clostridia; o__Clostridiales
3390b7a7dd11ddc650f93fbf8f13aa64	k__Bacteria; p__Actinobacteria; c__Actinobacteria; o__Actinomycetales; f__Micromonosporaceae; g__Pilimelia; s__
33aec9afb41c02b37b280d564b28b21d	k__Bacteria; p__Firmicutes; c__Clostridia; o__Clostridiales; f__Ruminococcaceae; g__Butyricicoccus; s__pullicaecorum
33b9b95018e06294e3b5708dc3bcd697	k__Bacteria; p__Firmicutes; c__Clostridia; o__Clostridiales; f__Ruminococcaceae
33dec757bb92e2268de23351ed492ed3	k__Bacteria; p__Firmicutes; c__Bacilli; o__Bacillales; f__Paenibacillaceae; g__; s__
33f530c92c9932ac76010f46d9405fe0	k__Bacteria; p__Firmicutes; c__Clostridia; o__Clostridiales; f__Clostridiaceae; g__Clostridium; s__
33ff3b33442edd44b52a2890f750c95e	k__Bacteria; p__Bacteroidetes; c__[Saprospirae]; o__[Saprospirales]; f__Chitinophagaceae; g__; s__
34196c6ef55b35036b2f799da593a3c4	k__Bacteria; p__Firmicutes; c__Clostridia; o__Clostridiales; f__Lachnospiraceae; g__Lachnoanaerobaculum; s__orale
3422d6cad073775c82734ff3f2fd5c36	k__Bacteria; p__Fusobacteria; c__Fusobacteriia; o__Fusobacteriales; f__Fusobacteriaceae; g__Fusobacterium; s__
344f3581e050d6052b374cbcda258085	k__Bacteria; p__Proteobacteria; c__Betaproteobacteria; o__Rhodocyclales; f__Rhodocyclaceae; g__Hydrogenophilus; s__
3468e2a610f30cb3f84ce4c71fc13e77	k__Bacteria; p__Firmicutes; c__Clostridia; o__Clostridiales
3479e10e4294c3b81c48b9dc9cbdbcad	k__Bacteria; p__Proteobacteria; c__Alphaproteobacteria; o__Sphingomonadales; f__Sphingomonadaceae; g__Sphingomonas; s__wittichii
347b83cc0c71af6e6cefb782fc1c1d13	k__Bacteria; p__Firmicutes; c__Clostridia; o__Clostridiales; f__Veillonellaceae; g__Selenomonas; s__
3481fa43fe5fba6aecdc7f9aae6ed9c0	k__Bacteria; p__Proteobacteria; c__Gammaproteobacteria; o__Enterobacteriales; f__Enterobacteriaceae
349fa01b157a09e02f7c73d2fd50e88a	k__Bacteria; p__Firmicutes; c__Clostridia; o__Clostridiales; f__; g__; s__
34acf094640c87c401f04665eb4c44fd	k__Bacteria; p__Firmicutes; c__Clostridia; o__Clostridiales; f__Lachnospiraceae; g__; s__
34b1668f06bb57d5757349d8e0220465	k__Bacteria; p__Proteobacteria; c__Deltaproteobacteria; o__Myxococcales; f__; g__; s__
34d9ab8127e5d39258d444caa552e541	k__Bacteria; p__Firmicutes; c__Clostridia; o__Clostridiales; f__Lachnospiraceae; g__[Ruminococcus]; s__
34da918492e2f0b10e29812544aa796e	k__Bacteria; p__Proteobacteria; c__Alphaproteobacteria; o__Rhizobiales; f__Hyphomicrobiaceae; g__Devosia; s__
34e02abbc6b22d41b1957b81fe942a80	k__Bacteria; p__Firmicutes; c__Bacilli; o__Lactobacillales; f__Lactobacillaceae; g__Lactobacillus; s__
34e330f47d6b0b3a7742855c99c1730b	k__Bacteria; p__Firmicutes; c__Clostridia; o__Clostridiales; f__Lachnospiraceae
34fe411fdc42ef1034dcb3e865cee133	k__Bacteria; p__Firmicutes; c__Bacilli; o__Bacillales; f__Paenibacillaceae; g__Paenibacillus
34fef6696bde7412f6c26b3bfe05616d	k__Bacteria; p__Firmicutes; c__Clostridia; o__Clostridiales; f__Ruminococcaceae; g__Oscillospira; s__
35195a80f6fb69ef8bd6827d1b045aad	k__Bacteria; p__Actinobacteria; c__Coriobacteriia; o__Coriobacteriales; f__Coriobacteriaceae; g__; s__
3519f9c73704be543d04847eb1f56c51	k__Bacteria; p__Firmicutes; c__Clostridia; o__Clostridiales; f__Lachnospiraceae; g__; s__
3525e8f55cd3355cc02bb9df648623e2	k__Bacteria; p__Firmicutes; c__Clostridia; o__Clostridiales; f__Lachnospiraceae; g__Blautia; s__producta
35395bfbeb71bcc8fc7d873c0327d043	k__Bacteria; p__Actinobacteria; c__Actinobacteria; o__Actinomycetales; f__Streptomycetaceae
353e5950e017b71570af49598981c100	k__Bacteria; p__Firmicutes; c__Clostridia; o__Clostridiales; f__Ruminococcaceae; g__Oscillospira; s__
3562d3a0374b9f2ed190c1a7aa7dedb7	k__Bacteria; p__Firmicutes; c__Clostridia; o__Clostridiales; f__Lachnospiraceae; g__[Ruminococcus]; s__gnavus
35787917d4e4ccdf5b0238a8ad2f37d5	k__Bacteria; p__Firmicutes; c__Clostridia; o__Clostridiales; f__Ruminococcaceae
3585967305da47ef61ac60984e8eeaee	k__Bacteria; p__Fusobacteria; c__Fusobacteriia; o__Fusobacteriales; f__Fusobacteriaceae; g__Fusobacterium; s__
359c87282b6b729efb0459d273b6fe6c	k__Bacteria; p__Firmicutes; c__Bacilli; o__Bacillales; f__Paenibacillaceae; g__Thermobacillus
35b8c10c192360a7cdad628a185e99e5	k__Bacteria; p__Firmicutes; c__Clostridia; o__Clostridiales; f__; g__; s__
35cbb315e019e0a8768d4b73862df415	k__Bacteria; p__Actinobacteria; c__Coriobacteriia; o__Coriobacteriales; f__Coriobacteriaceae; g__Collinsella; s__aerofaciens
35d20da789dde8d76e4389fd6d30cc9d	k__Bacteria; p__Actinobacteria; c__Actinobacteria; o__Actinomycetales; f__Micromonosporaceae; g__Dactylosporangium; s__
35f1bc6a86f5e896f3fba4b1afd48e94	k__Bacteria; p__Bacteroidetes; c__; o__; f__; g__; s__
35f30725f1dd9dbab32c5995ffb22cae	k__Bacteria; p__Actinobacteria; c__Coriobacteriia; o__Coriobacteriales; f__Coriobacteriaceae; g__Atopobium; s__
35ffcc3b809d667286737d79670b8de5	k__Bacteria; p__Actinobacteria; c__Actinobacteria; o__Bifidobacteriales; f__Bifidobacteriaceae; g__Bifidobacterium
3607599c1aab4789914bb85aa5387ec7	k__Bacteria; p__Tenericutes; c__Mollicutes; o__RF39; f__; g__; s__
3610fb218268b3ca418c641482e4b936	k__Bacteria; p__Firmicutes; c__Clostridia; o__Clostridiales; f__Lachnospiraceae; g__; s__
36283e391244b7f2f6bf4aa44a5289c8	k__Bacteria; p__Firmicutes; c__Clostridia; o__Clostridiales; f__Lachnospiraceae; g__; s__
362f27b3d4c13e79582c6978e9564195	k__Bacteria; p__Proteobacteria; c__Betaproteobacteria; o__Burkholderiales; f__Burkholderiaceae; g__Burkholderia; s__bryophila
363b5bc429aa94cebf6edfc8403e2554	k__Bacteria; p__Firmicutes; c__Clostridia; o__Clostridiales; f__; g__; s__
36476df5425c498f6bcdd23c1ae35ce1	k__Bacteria; p__Firmicutes; c__Clostridia; o__Clostridiales; f__Lachnospiraceae; g__; s__
3655c5846288d014ebc49d9682047d01	k__Bacteria; p__Firmicutes; c__Bacilli; o__Bacillales; f__Paenibacillaceae; g__Cohnella; s__
366605b007893bc976aa8d55d50fa1cf	k__Bacteria; p__Actinobacteria; c__Actinobacteria; o__Actinomycetales; f__Micrococcaceae; g__Rothia
36697c4e1f1a27bb4ae5ae1b4fa71422	k__Bacteria; p__Proteobacteria; c__Betaproteobacteria; o__Neisseriales; f__Neisseriaceae; g__; s__
366bb3ddd63d135bec172051cf2cfe0a	k__Bacteria; p__Actinobacteria; c__Actinobacteria; o__Actinomycetales; f__Actinomycetaceae; g__Actinomyces; s__
367fd0532f406448a26bcca3b54e8e2b	k__Bacteria; p__Verrucomicrobia; c__Verrucomicrobiae; o__Verrucomicrobiales; f__Verrucomicrobiaceae; g__Luteolibacter; s__
369273fb9626ae1bbab9e040792c6322	k__Bacteria; p__Firmicutes; c__Bacilli; o__Lactobacillales; f__Lactobacillaceae; g__Lactobacillus
369b6b7e624a1e0c7cbec62a9dd2d1dc	k__Bacteria; p__Firmicutes; c__Clostridia; o__Clostridiales; f__Lachnospiraceae; g__Oribacterium; s__
36c123e47d5b94de62c3f40fb6fd45cc	k__Bacteria; p__WPS-2; c__; o__; f__; g__; s__
36c15a424d4f137d2b3be97a5157848c	k__Bacteria; p__Firmicutes; c__Clostridia; o__Clostridiales; f__; g__; s__
36ce67b3fecce277df99829617975495	k__Bacteria; p__Actinobacteria; c__Actinobacteria; o__Actinomycetales; f__Micrococcaceae; g__Rothia; s__mucilaginosa
36d9ad396b85196c9b4cf68b81789585	k__Bacteria; p__Firmicutes; c__Clostridia; o__Clostridiales; f__Lachnospiraceae; g__Lachnospira; s__
36d9f553b6f26520e7a6f8671cdde1f5	k__Bacteria; p__Firmicutes; c__Clostridia; o__Clostridiales; f__; g__; s__
36e61350f3340bfcdfd81e8345684d27	k__Bacteria; p__Proteobacteria; c__Alphaproteobacteria; o__Rhodobacterales; f__Rhodobacteraceae; g__Paracoccus; s__marcusii
36ecd054f5309a9658926a0926d7ee82	k__Bacteria; p__Proteobacteria; c__Alphaproteobacteria; o__Rhizobiales; f__Rhizobiaceae; g__Shinella; s__granuli
36f2f0e8ead2c8956e24f22bf7376811	k__Bacteria; p__Firmicutes; c__Erysipelotrichi; o__Erysipelotrichales; f__Erysipelotrichaceae; g__Clostridium; s__cocleatum
3714db21d59bf50cff3ddd13ce2ebd2c	k__Bacteria; p__Actinobacteria; c__Actinobacteria; o__Actinomycetales; f__Actinomycetaceae; g__Actinomyces; s__
37154a6bebd8b635135508cd623d1fd9	k__Bacteria; p__Firmicutes; c__Clostridia; o__Clostridiales; f__Ruminococcaceae; g__Faecalibacterium; s__prausnitzii
3730ebc0f0bb5d970d53cc2d210d3b1f	k__Bacteria; p__Actinobacteria; c__Actinobacteria; o__Actinomycetales; f__Mycobacteriaceae; g__Mycobacterium; s__
374b724806294b861c4ed5cfb74e2f31	k__Bacteria; p__Proteobacteria; c__Alphaproteobacteria; o__Rhizobiales; f__Methylobacteriaceae; g__Methylobacterium; s__adhaesivum
374d4b133f212acc8be6df5c0d7f96b9	k__Bacteria; p__Bacteroidetes; c__Bacteroidia; o__Bacteroidales; f__Rikenellaceae; g__; s__
3752387de80c900473e865295f515def	k__Bacteria; p__Tenericutes; c__Mollicutes; o__RF39; f__; g__; s__
3761452baa12c00cc5b1707b30fff4a7	k__Bacteria; p__Tenericutes; c__Mollicutes; o__RF39; f__; g__; s__
377a64426d6435ba65220070f22f5602	k__Bacteria; p__Actinobacteria; c__Actinobacteria; o__Bifidobacteriales; f__Bifidobacteriaceae; g__Bifidobacterium; s__animalis
377bf1b86dd15d576b1b9edd617843ce	k__Bacteria; p__Bacteroidetes; c__Bacteroidia; o__Bacteroidales; f__Prevotellaceae; g__Prevotella; s__
37841ae59bd44a38b838c600557b80e5	k__Bacteria; p__Firmicutes; c__Bacilli; o__Bacillales; f__Staphylococcaceae; g__Staphylococcus
37966a7cf52ed4d2cff450936baeabd2	k__Bacteria; p__Firmicutes; c__Bacilli; o__Bacillales; f__Paenibacillaceae; g__Paenibacillus; s__
3796f5d139b2a981a0e09fc625a446a5	k__Bacteria; p__Firmicutes; c__Clostridia; o__Clostridiales; f__; g__; s__
379efc24ed5846dbb706d7b79dcf34d7	k__Bacteria; p__Firmicutes; c__Clostridia; o__Clostridiales; f__Ruminococcaceae; g__Oscillospira; s__
37a0a427f45ea3b8299b4a41c10d02e6	k__Bacteria; p__Firmicutes; c__Clostridia; o__Clostridiales; f__; g__; s__
37a7e187d35366eb6167cbe90e558af1	k__Bacteria; p__Firmicutes; c__Clostridia; o__Clostridiales
37ab4ef1ea2e1b3c05fc73c9da192b05	k__Bacteria; p__Firmicutes; c__Clostridia; o__Clostridiales; f__Lachnospiraceae; g__Oribacterium; s__
37af6d00c2c9a7e9c8ac8b0fd5b564ee	k__Bacteria; p__Proteobacteria; c__Betaproteobacteria; o__Rhodocyclales; f__Rhodocyclaceae; g__Hydrogenophilus; s__
37f004671c936285c26471120596b2f5	k__Bacteria; p__Firmicutes; c__Clostridia; o__Clostridiales; f__Clostridiaceae; g__Sarcina; s__
380791030b30ad8df73ddde9059594bb	k__Bacteria; p__Cyanobacteria; c__Chloroplast; o__Streptophyta; f__; g__; s__
38145b92af854c92537660695038089f	k__Bacteria; p__Bacteroidetes; c__Bacteroidia; o__Bacteroidales; f__Porphyromonadaceae; g__Tannerella; s__
38367a8a414bbde849313409772ca4b8	k__Bacteria; p__Firmicutes; c__Bacilli; o__Bacillales; f__Bacillaceae; g__Bacillus; s__
387efd8a434c08bb42c8c9486033b49b	k__Bacteria; p__Firmicutes; c__Clostridia; o__Clostridiales; f__Ruminococcaceae; g__Faecalibacterium; s__prausnitzii
38802b379cd430ee550000bd2fc3bc25	k__Archaea; p__Euryarchaeota; c__Methanobacteria; o__Methanobacteriales; f__Methanobacteriaceae; g__Methanobacterium; s__
3883c3ab093249287e47ca21ff186ca4	k__Bacteria; p__Firmicutes; c__Clostridia; o__Clostridiales; f__Lachnospiraceae; g__Coprococcus; s__
388ff961d4ea8d9683fb61ff78a1173e	k__Bacteria; p__Firmicutes; c__Clostridia; o__Clostridiales; f__Veillonellaceae; g__Veillonella; s__parvula
38a69e58b14bd29e2002c8cd60c1db6b	k__Bacteria; p__Firmicutes; c__Clostridia; o__Clostridiales; f__Lachnospiraceae; g__Catonella; s__
38adbe9eea67ff19396c8bf63d5363bb	k__Bacteria; p__Firmicutes; c__Clostridia; o__Clostridiales; f__Lachnospiraceae
38afda7b06d6c3744ec6a86cad9f070f	k__Bacteria; p__Firmicutes; c__Clostridia; o__OPB54; f__; g__; s__
38beb9295889cd97ccde32e38be9b052	k__Bacteria; p__Firmicutes; c__Clostridia; o__Clostridiales; f__Lachnospiraceae
38d8134d497b3ae618c388434dd07d42	k__Bacteria; p__Proteobacteria; c__Alphaproteobacteria
38f05bfd2beddf170bafe29b4adee5fd	k__Bacteria; p__Firmicutes; c__Clostridia; o__Clostridiales; f__Lachnospiraceae; g__Blautia; s__obeum
38f184b1f8e3b9b3d71c2d39666a2bce	k__Bacteria; p__Proteobacteria; c__Gammaproteobacteria; o__Pseudomonadales; f__Pseudomonadaceae; g__Pseudomonas
38fe81d6e47aef9b0d46a441b58ff65f	k__Bacteria; p__Actinobacteria; c__Actinobacteria; o__Actinomycetales; f__Thermomonosporaceae; g__Actinomadura
3916a456bb0a3bfd02c15fd537ff5923	k__Bacteria; p__Firmicutes; c__Clostridia; o__Clostridiales; f__Veillonellaceae; g__Megasphaera; s__
392f54f92f26a7996e8c124ac6d23892	k__Bacteria; p__Proteobacteria; c__Gammaproteobacteria; o__Xanthomonadales; f__Xanthomonadaceae; g__Stenotrophomonas; s__panacihumi
394e2fe945d6d09269dffea33c42057b	k__Bacteria; p__Firmicutes; c__Bacilli; o__Lactobacillales; f__Aerococcaceae; g__Alloiococcus; s__
394eda29c886632f514dd94b58381186	k__Bacteria; p__Proteobacteria; c__Gammaproteobacteria; o__Pasteurellales; f__Pasteurellaceae; g__Haemophilus; s__parainfluenzae
395178ba0b1caef55353254e0b05fdc3	k__Bacteria; p__Bacteroidetes; c__Bacteroidia; o__Bacteroidales; f__Prevotellaceae; g__Prevotella; s__melaninogenica
395414a4b7d587e63586604087fca03c	k__Bacteria; p__Proteobacteria; c__Alphaproteobacteria; o__Sphingomonadales; f__Sphingomonadaceae; g__Sphingomonas
396010820b454251c6888c24cd7b4d9b	k__Bacteria; p__Firmicutes; c__Clostridia; o__Clostridiales; f__Ruminococcaceae; g__Clostridium
396472bc78dc32a45fef7019f660f788	k__Bacteria; p__Firmicutes; c__Clostridia; o__Clostridiales; f__Ruminococcaceae; g__Gemmiger; s__formicilis
396f97c66f05d09c30b66f9c3e65108b	k__Bacteria; p__Actinobacteria; c__Actinobacteria; o__Actinomycetales; f__Corynebacteriaceae; g__Corynebacterium; s__
396ffa76286336a3eeb1ea420e60f86b	k__Bacteria; p__Firmicutes; c__Clostridia; o__Clostridiales; f__Lachnospiraceae; g__; s__
3971f12074ab43063f75c7cf8030f49d	k__Bacteria; p__Firmicutes; c__Clostridia; o__Clostridiales; f__; g__; s__
39788b744410e9653732c14758542b33	k__Bacteria; p__Proteobacteria; c__Betaproteobacteria; o__Burkholderiales; f__Burkholderiaceae; g__Burkholderia; s__andropogonis
398b683b106b191a01b80619fcae58ee	k__Bacteria; p__Proteobacteria; c__Alphaproteobacteria; o__Rhizobiales; f__Hyphomicrobiaceae; g__Devosia; s__
3996a9ac048e5841b5fed3afc5559e50	k__Bacteria; p__Proteobacteria; c__Betaproteobacteria; o__Neisseriales; f__Neisseriaceae; g__Kingella; s__
399a1ba52a1c587d087c11fedd41f7af	k__Bacteria; p__Tenericutes; c__Mollicutes; o__RF39; f__; g__; s__
399d8cfe2d9ea6b6ce1e3ef4aa053430	k__Bacteria; p__Proteobacteria; c__Alphaproteobacteria; o__Sphingomonadales; f__Sphingomonadaceae; g__Sphingomonas; s__wittichii
39b8f5d589bf47b258929cadf35421a4	k__Bacteria; p__Firmicutes; c__Clostridia; o__Clostridiales; f__Lachnospiraceae
39dfa0519355625a9bac7d72a843990d	k__Bacteria; p__Firmicutes; c__Clostridia; o__Clostridiales; f__Lachnospiraceae; g__Roseburia; s__faecis
39f7021cc8b86664b2b5233bfcaf02f9	k__Bacteria; p__Firmicutes; c__Clostridia; o__Clostridiales; f__Ruminococcaceae; g__Clostridium; s__hungatei
39fce827ceabb76a6010195957d9e59b	k__Bacteria; p__Firmicutes; c__Clostridia; o__Clostridiales; f__; g__; s__
3a42c6feffe934d45f7697a6d8ce641b	k__Bacteria; p__Firmicutes; c__Clostridia; o__OPB54; f__; g__; s__
3a44838b7ae01d12d6931bd50e0479c5	k__Bacteria; p__Bacteroidetes; c__Bacteroidia; o__Bacteroidales; f__Prevotellaceae; g__Prevotella; s__
3a636aa3cf7de800747f9dd1311d601c	k__Bacteria; p__Firmicutes; c__Clostridia; o__Clostridiales; f__; g__; s__
3a7da564e6fafad475685e983a9435e8	k__Bacteria; p__Tenericutes; c__Mollicutes; o__RF39; f__; g__; s__
3a90c3b498375e9f16d1843039371775	k__Bacteria; p__Firmicutes; c__Clostridia; o__Clostridiales; f__; g__; s__
3aa40e9bffb396e67f152a369cae53f0	k__Bacteria; p__Firmicutes; c__Clostridia; o__Clostridiales; f__; g__; s__
3aac6530f4f7126e5a75247db024d3f8	k__Bacteria; p__Firmicutes; c__Clostridia; o__Clostridiales; f__; g__; s__
3ab2919de4b7455a5a7ea5dc546aa67b	k__Bacteria; p__Firmicutes; c__Bacilli; o__Bacillales; f__Bacillaceae
3abae39e94cf51920aec2b9fb42b53a9	k__Bacteria; p__Firmicutes; c__Clostridia; o__Clostridiales; f__[Mogibacteriaceae]; g__; s__
3ac7012c538693bcf363c9d4b6d5e9d5	k__Bacteria; p__Firmicutes; c__Bacilli; o__Lactobacillales; f__Lactobacillaceae; g__Lactobacillus
3ac7aa1ed7b363df4d599cdec7e02790	k__Bacteria; p__Actinobacteria; c__Thermoleophilia; o__Solirubrobacterales; f__Patulibacteraceae; g__; s__
3ad4f5dfccce11238593b7dd553b7c09	k__Bacteria; p__Firmicutes; c__Clostridia; o__Clostridiales; f__Lachnospiraceae; g__[Ruminococcus]; s__gnavus
3b010dbd9eae72a79f11af5d24eb3ca3	k__Bacteria; p__Verrucomicrobia; c__Verrucomicrobiae; o__Verrucomicrobiales; f__Verrucomicrobiaceae; g__Akkermansia; s__muciniphila
3b0ad10d8b65188ed821ad66f710b506	k__Bacteria; p__Firmicutes; c__Clostridia; o__Clostridiales; f__Lachnospiraceae; g__; s__
3b168fb85ddb0f3097c8dd097429155d	k__Bacteria; p__Proteobacteria; c__Gammaproteobacteria; o__Pseudomonadales; f__Pseudomonadaceae; g__Pseudomonas; s__
3b2d8f1411476d1db18c34795156ab45	k__Bacteria; p__Actinobacteria; c__Actinobacteria; o__Actinomycetales; f__Actinomycetaceae; g__Actinomyces; s__
3b3885ac44527acd40f69a9393352906	k__Bacteria; p__Tenericutes; c__Mollicutes; o__RF39; f__; g__; s__
3b43f81257164f1aab862fc160595b83	k__Bacteria; p__Firmicutes; c__Clostridia; o__Clostridiales; f__; g__; s__
3b6578ce4fdcc38fe6f8187516e39de7	k__Bacteria; p__Firmicutes; c__Clostridia; o__Clostridiales; f__Lachnospiraceae; g__Oribacterium; s__
3b6e254075f98134ce711ff00548bb71	k__Bacteria; p__Firmicutes; c__Clostridia; o__Clostridiales; f__; g__; s__
3b7945dcadf765c5d0ae4754b95649d9	k__Bacteria; p__Firmicutes; c__Clostridia; o__Clostridiales; f__; g__; s__
3b8897cae0f01b0e62ea4c16c1842f13	k__Bacteria; p__Firmicutes; c__Clostridia; o__Clostridiales; f__Clostridiaceae; g__Clostridium; s__
3b90f0c0d58298d4e0a05c553e993808	k__Bacteria; p__Proteobacteria; c__Gammaproteobacteria; o__Pseudomonadales; f__Moraxellaceae; g__Enhydrobacter; s__
3b94c19ef326eea0918e1c3d244c999c	k__Bacteria; p__Proteobacteria; c__Gammaproteobacteria; o__Enterobacteriales; f__Enterobacteriaceae
3bac14d2805bf995afe9d316a5777b1e	k__Bacteria; p__Firmicutes; c__Bacilli; o__Lactobacillales; f__Lactobacillaceae; g__Lactobacillus; s__helveticus
3bae00d865b43e800a6f297f958ac2de	k__Bacteria; p__Firmicutes; c__Clostridia; o__Clostridiales; f__Veillonellaceae; g__Veillonella; s__dispar
3bb628561b281e9744a380c1994c2018	k__Bacteria; p__Proteobacteria; c__Gammaproteobacteria; o__Pseudomonadales; f__Pseudomonadaceae; g__Pseudomonas; s__viridiflava
3bce8dac9efe6fa868ed9c13c2aaed37	k__Bacteria; p__Bacteroidetes; c__Flavobacteriia; o__Flavobacteriales; f__Flavobacteriaceae; g__Capnocytophaga; s__
3bfbecef2fb02e1065e5c4a9c2730d75	k__Bacteria; p__Tenericutes; c__Mollicutes; o__RF39; f__; g__; s__
3c01540f689ab74dc5d2346cebc1f09c	k__Bacteria; p__Firmicutes; c__Clostridia; o__Clostridiales; f__; g__; s__
3c172164c6f712952765b7b38431a1fe	k__Bacteria; p__Proteobacteria; c__Betaproteobacteria; o__Burkholderiales; f__Alcaligenaceae
3c17b26dc4c2097469d60c8255408670	k__Bacteria; p__Proteobacteria; c__Gammaproteobacteria; o__Pseudomonadales; f__Pseudomonadaceae; g__Pseudomonas
3c3838a4f4aec7b03515ae3cb23a6bab	k__Bacteria; p__Firmicutes; c__Clostridia; o__Clostridiales; f__Clostridiaceae; g__Clostridium; s__
3c43d205725b843105c01fc77c1d069d	k__Bacteria; p__Firmicutes; c__Bacilli; o__Bacillales; f__Alicyclobacillaceae; g__Alicyclobacillus; s__
3ca67f6b4d1581754c805ed5cc9d9093	k__Bacteria; p__Firmicutes; c__Clostridia; o__Clostridiales; f__Lachnospiraceae; g__Coprococcus; s__
3cc2913d7687f4cdbb8354510c83ea9c	k__Bacteria; p__Firmicutes; c__Clostridia; o__Clostridiales; f__; g__; s__
3cc2df2f38790b52c6ba71773212b38a	k__Bacteria; p__Firmicutes; c__Clostridia; o__Clostridiales; f__Ruminococcaceae
3cc610a8f198bbce0530866bba589498	k__Bacteria; p__Firmicutes; c__Clostridia; o__Clostridiales; f__Lachnospiraceae; g__; s__
3cd9ce63f826137d18ca1a11155a21ad	k__Bacteria; p__Actinobacteria; c__Actinobacteria; o__Actinomycetales; f__Microbacteriaceae; g__Cryocola; s__
3cec387e3e89982bf989b857f7c296d1	k__Bacteria; p__Firmicutes; c__Clostridia; o__Clostridiales; f__Lachnospiraceae
3cf39164632c1ee71f5b0099e44fb792	k__Bacteria; p__Firmicutes; c__Clostridia; o__Clostridiales; f__Lachnospiraceae; g__Catonella; s__
3d028d3476ff911cf600faf51da02f10	k__Bacteria; p__Firmicutes; c__Bacilli; o__Bacillales; f__Paenibacillaceae; g__Paenibacillus; s__
3d0fdaba5562129fdce740dd2c09f772	k__Bacteria; p__Actinobacteria; c__Actinobacteria; o__Actinomycetales; f__Cellulomonadaceae; g__Cellulomonas; s__
3d23e2122175eab5facbfe07da5bfb99	k__Bacteria; p__Firmicutes; c__Clostridia; o__Clostridiales; f__[Tissierellaceae]; g__Anaerococcus; s__
3d2675caa4e673ad4f64c3f9d15e713d	k__Bacteria; p__Actinobacteria; c__Actinobacteria; o__Actinomycetales; f__Corynebacteriaceae; g__Corynebacterium; s__
3d2cb30c8077a343e0b66b2ebe901089	k__Bacteria; p__Firmicutes; c__Clostridia; o__Clostridiales; f__Lachnospiraceae; g__Oribacterium; s__
3d2cd874a4eea35af603ca0c0c25c89f	k__Bacteria; p__Firmicutes; c__Clostridia; o__Clostridiales; f__Lachnospiraceae; g__Coprococcus; s__
3d31b47fbe4f5578c2140a1e20d86582	k__Bacteria; p__Firmicutes; c__Clostridia; o__Clostridiales; f__; g__; s__
3d43dfa8f0ad516a210c3bb37f6d3f89	k__Bacteria; p__Proteobacteria; c__Alphaproteobacteria; o__Rhizobiales; f__Hyphomicrobiaceae; g__Pedomicrobium; s__australicum
3d57e0d0ff4cd592311ca5b5b0a11df7	k__Bacteria; p__Actinobacteria; c__Actinobacteria; o__Actinomycetales; f__Actinomycetaceae; g__Actinomyces; s__
3d59754994ad442a8c7e69589d74a6ce	k__Bacteria; p__Proteobacteria; c__Gammaproteobacteria; o__Pseudomonadales; f__Moraxellaceae; g__Moraxella; s__
3d5baff45729bf2214074c2e9f77ad10	k__Bacteria; p__Proteobacteria; c__Gammaproteobacteria; o__Pseudomonadales; f__Moraxellaceae; g__Acinetobacter; s__rhizosphaerae
3d5c519f1b4e4f47650fcebca0efe4d8	k__Bacteria; p__Firmicutes; c__Clostridia; o__Clostridiales; f__Lachnospiraceae; g__; s__
3d656d5a4d9a70a1e4edaf6adbfb685b	k__Bacteria; p__Tenericutes; c__Mollicutes; o__RF39; f__; g__; s__
3d675bc2e3ca7ae2dbd80044122f82b0	k__Bacteria; p__Firmicutes; c__Clostridia; o__Clostridiales; f__Ruminococcaceae; g__Ruminococcus; s__
3d8dc6bf897512adfc0626417b44dfbf	k__Bacteria; p__Firmicutes; c__Clostridia; o__Clostridiales; f__Ruminococcaceae; g__; s__
3d8fb6f4ed7962d88c2f3ae9411d13de	k__Bacteria; p__Firmicutes; c__Bacilli; o__Bacillales; f__Paenibacillaceae; g__Aneurinibacillus; s__migulanus
3d9440ce64d5dc4fd4cc0411efa031e0	k__Bacteria; p__Gemmatimonadetes; c__Gemm-5; o__; f__; g__; s__
3db349f5154e3124fe2f94dee6703120	k__Bacteria; p__Firmicutes; c__Clostridia; o__Clostridiales
3dfaa3fabdf04711351c97af550d2921	k__Bacteria; p__Firmicutes; c__Clostridia; o__Clostridiales; f__; g__; s__
3e02fb4d335d0ebe5952b83f43fcdef2	k__Bacteria; p__Firmicutes; c__Bacilli; o__Gemellales; f__Gemellaceae; g__Gemella; s__
3e0a5c3c45d702a53a3d2de195e4db33	k__Bacteria; p__Firmicutes; c__Clostridia; o__Clostridiales; f__Ruminococcaceae; g__; s__
3e0b4ddc74ad82b8b1d425e326b70746	k__Bacteria; p__Firmicutes; c__Clostridia; o__Clostridiales; f__; g__; s__
3e0e8a805126e92d3771bf890ad3021c	k__Bacteria; p__Firmicutes; c__Erysipelotrichi; o__Erysipelotrichales; f__Erysipelotrichaceae; g__; s__
3e17a196254484aaa5a6ba2859067444	k__Bacteria; p__Bacteroidetes; c__Flavobacteriia; o__Flavobacteriales; f__Flavobacteriaceae; g__Capnocytophaga; s__ochracea
3e2d25e7bb4f8dac1f8554bdd5774411	k__Bacteria; p__Proteobacteria; c__Alphaproteobacteria; o__Sphingomonadales; f__Sphingomonadaceae; g__Novosphingobium; s__resinovorum
3e340251bf8fe952d0f9c35e9e25a272	k__Bacteria; p__Firmicutes; c__Clostridia; o__Clostridiales; f__Lachnospiraceae; g__; s__
3e3dd9b30eca620799ce223966abf3db	k__Bacteria; p__Firmicutes; c__Clostridia; o__Clostridiales; f__Clostridiaceae; g__Clostridium; s__kluyveri
3e86e9620a4aceb493a34d5c47723513	k__Bacteria; p__Proteobacteria; c__Gammaproteobacteria; o__Enterobacteriales; f__Enterobacteriaceae
3e9197b693feec2068b9142cb1250d69	k__Bacteria; p__Bacteroidetes; c__[Saprospirae]; o__[Saprospirales]; f__Chitinophagaceae; g__Chitinophaga; s__
3e9e6197d0866ceeaa0d19f676601a4a	k__Bacteria; p__Firmicutes; c__Clostridia; o__Clostridiales; f__; g__; s__
3eb129ba3c12a44620647798dde41194	k__Bacteria; p__Firmicutes; c__Clostridia; o__Clostridiales; f__; g__; s__
3ebe761bfb1238c87195d431f41bf976	k__Bacteria; p__Proteobacteria; c__Gammaproteobacteria; o__Pseudomonadales; f__Moraxellaceae; g__Acinetobacter
3ecebfd7ce98fb76d8eeb2066d44e9b9	k__Bacteria; p__Bacteroidetes; c__Bacteroidia; o__Bacteroidales; f__Prevotellaceae; g__Prevotella; s__
3ee0abd28a069c307ff0cdbcb570ed09	k__Bacteria; p__Proteobacteria; c__Gammaproteobacteria; o__Legionellales; f__Legionellaceae; g__Legionella; s__fairfieldensis
3ee3085cd6f25c2449332df3675b9eee	k__Bacteria; p__Firmicutes; c__Clostridia; o__Clostridiales; f__Lachnospiraceae; g__; s__
3eed74de826f4bdb32855e8a53094561	k__Bacteria; p__Firmicutes; c__Clostridia; o__Clostridiales; f__[Tissierellaceae]; g__Anaerococcus; s__
3ef8e129658a80a78ddc434d7961ddc9	k__Bacteria; p__Actinobacteria; c__Actinobacteria; o__Actinomycetales; f__Actinomycetaceae; g__Actinomyces; s__
3f073f6261636699e8ff1192fbc1215e	k__Bacteria; p__Firmicutes; c__Clostridia; o__Clostridiales; f__; g__; s__
3f078d93b2fd930edd67461d95e4be93	k__Bacteria; p__Proteobacteria; c__Alphaproteobacteria; o__Sphingomonadales; f__Sphingomonadaceae; g__; s__
3f1ab4058b00e2a309322ba3cf5e5da1	k__Bacteria; p__Actinobacteria; c__Actinobacteria; o__Actinomycetales; f__Micrococcaceae; g__Kocuria; s__
3f2528fd60a3c6bfdd9c72b69f0f91ae	k__Bacteria; p__Firmicutes; c__Clostridia; o__Clostridiales; f__; g__; s__
3f2c9d5b1302031a205d4f3b77c6d3c1	k__Bacteria; p__Firmicutes; c__Clostridia; o__Clostridiales; f__; g__; s__
3f49f2e33639f81618c76b5807f6498c	k__Bacteria; p__Firmicutes; c__Clostridia; o__Clostridiales; f__Ruminococcaceae; g__; s__
3f574a1c6ddd83e13a9f0c0d99628511	k__Bacteria; p__Firmicutes; c__Clostridia; o__Clostridiales; f__Ruminococcaceae; g__Ruminococcus; s__
3f5c5692105a80c75ac9e1136cff08ed	k__Bacteria; p__Firmicutes; c__Bacilli; o__Bacillales; f__Paenibacillaceae; g__; s__
3f6c3a172d7039ba8615a0c0c6259735	k__Bacteria; p__Proteobacteria; c__Gammaproteobacteria; o__Pseudomonadales; f__Pseudomonadaceae; g__Pseudomonas; s__fragi
3f803c6a182a7484832b04d0550ce269	k__Bacteria; p__Actinobacteria; c__Actinobacteria; o__Actinomycetales; f__Kineosporiaceae; g__Kineococcus; s__
3f85629dd891ab0ca5806176ab87224e	k__Bacteria; p__Firmicutes; c__Clostridia; o__Clostridiales; f__Ruminococcaceae; g__Oscillospira; s__
3f86f0b25e16ee88cd82520c29c17e4d	k__Bacteria; p__Actinobacteria; c__Actinobacteria; o__Actinomycetales; f__Corynebacteriaceae; g__Corynebacterium; s__
3fa8c838cc5838d5ae3fed6e201f61f1	k__Bacteria; p__Actinobacteria; c__Actinobacteria; o__Bifidobacteriales; f__Bifidobacteriaceae; g__Bifidobacterium
3fb11383d86dfad2dfd111339161741f	k__Bacteria; p__Bacteroidetes; c__Flavobacteriia; o__Flavobacteriales; f__[Weeksellaceae]; g__Chryseobacterium; s__
3fb3b1569c3f1aba40c5159242fb7539	k__Bacteria; p__Firmicutes; c__Erysipelotrichi; o__Erysipelotrichales; f__Erysipelotrichaceae; g__; s__
3fb663a5bf98e163dbeedefe91c6bae9	k__Bacteria; p__Firmicutes; c__Clostridia; o__Clostridiales; f__Lachnospiraceae; g__Blautia
3fe33f2b1827095880111882d0ec3db5	k__Bacteria; p__Firmicutes; c__Clostridia; o__Clostridiales; f__Ruminococcaceae; g__Ruminococcus; s__
3ff4a1b0765954aa4a0c0ef310f5dce1	k__Bacteria; p__Fusobacteria; c__Fusobacteriia; o__Fusobacteriales; f__Leptotrichiaceae; g__Leptotrichia; s__
3ffe2eb0042700d44609f391803aceca	k__Bacteria; p__Firmicutes; c__Clostridia; o__Clostridiales; f__; g__; s__
40005a622f388b5e29824bb5a5091c8e	k__Bacteria; p__Actinobacteria; c__Actinobacteria; o__Actinomycetales; f__Actinomycetaceae; g__Actinomyces; s__
401d41f10377f8f27046e738dab2286f	k__Bacteria; p__Bacteroidetes; c__Flavobacteriia; o__Flavobacteriales; f__Flavobacteriaceae; g__Capnocytophaga; s__
401e9cda8dd173db76e03cfe30f2274e	k__Bacteria; p__Firmicutes; c__Clostridia; o__Clostridiales; f__Ruminococcaceae; g__Oscillospira; s__
40271f539fb35c5f1195917423441f16	k__Bacteria; p__Firmicutes; c__Clostridia; o__Clostridiales; f__Lachnospiraceae; g__Coprococcus; s__
402baf26e553a439c04e034b826ca026	k__Bacteria; p__Actinobacteria; c__Actinobacteria; o__Actinomycetales; f__Nocardiopsaceae; g__; s__
4037a2b82cfdecad7f2379e06034f0df	k__Bacteria; p__Actinobacteria; c__Coriobacteriia; o__Coriobacteriales; f__Coriobacteriaceae; g__Atopobium; s__
403f7a1d3ac28bf13c945415a23611ed	k__Bacteria; p__Firmicutes; c__Clostridia; o__Clostridiales; f__Peptostreptococcaceae; g__; s__
404344d45b20629b4c99d29eaefe6054	k__Bacteria; p__Proteobacteria; c__Alphaproteobacteria; o__Rhizobiales; f__Aurantimonadaceae; g__; s__
40463b30014a9fcaef5e86542d14d348	k__Bacteria; p__Firmicutes; c__Clostridia; o__Clostridiales; f__; g__; s__
404d3c101e87a84cb90ba44886455946	k__Bacteria; p__Proteobacteria; c__Betaproteobacteria; o__Neisseriales; f__Neisseriaceae; g__; s__
405600e715167b5f59ca7a6438a970e2	k__Bacteria; p__Firmicutes; c__Clostridia; o__Clostridiales; f__Ruminococcaceae; g__Ruminococcus; s__
4066e07db1bae989fd02d771401e3b09	k__Bacteria; p__Firmicutes; c__Clostridia; o__Clostridiales; f__Ruminococcaceae; g__; s__
40874d61006874f7c87d904707d320d9	k__Bacteria; p__Firmicutes; c__Clostridia; o__Clostridiales; f__Clostridiaceae; g__; s__
40af12ed13031b59614bd453fbee2db0	k__Bacteria; p__Tenericutes; c__Mollicutes; o__RF39; f__; g__; s__
40b8dfaed6d7b06088e550aaaf59c606	k__Bacteria; p__Firmicutes; c__Clostridia; o__Clostridiales; f__Veillonellaceae; g__Sporomusa; s__
40f0ed96c6770a70bf856d72d112fe8f	k__Bacteria; p__Actinobacteria; c__Actinobacteria; o__Actinomycetales; f__Micrococcaceae; g__Kocuria
40f733a1d8ded4596710ca1711ce797f	k__Bacteria; p__Firmicutes; c__Clostridia; o__Clostridiales; f__Peptococcaceae; g__Peptococcus; s__
410e1eaa1468a3d40595898f671ba0b3	k__Bacteria; p__Firmicutes; c__Clostridia; o__Clostridiales; f__Ruminococcaceae; g__; s__
4115cd19d50e5a6b8550c3a1f9a6c75e	k__Bacteria; p__Firmicutes; c__Clostridia; o__Clostridiales; f__; g__; s__
4122c8e6818a89e7a33507f8521f4ba4	k__Bacteria; p__Firmicutes; c__Clostridia; o__Clostridiales; f__Clostridiaceae; g__Clostridium; s__perfringens
4140e20d4126a0a4a242cfd29cc479bc	k__Bacteria; p__Firmicutes; c__Clostridia; o__Clostridiales; f__Veillonellaceae; g__Selenomonas; s__
41481b0bfd94270bdac0089cdb42625b	k__Bacteria; p__Firmicutes; c__Clostridia; o__Clostridiales; f__Veillonellaceae; g__Sporomusa; s__polytropa
4169cfc9157cb21b5af2f05b93ea4ef0	k__Bacteria; p__Firmicutes; c__Clostridia; o__Clostridiales; f__Lachnospiraceae; g__[Ruminococcus]; s__gnavus
417343a7fce6d21372a7a892fe9633b1	k__Bacteria; p__Firmicutes; c__Clostridia; o__Clostridiales; f__Lachnospiraceae
4173d2f6011fec977b73af73287c70aa	k__Bacteria; p__Firmicutes; c__Clostridia; o__Clostridiales; f__; g__; s__
41968913d9ca2d9dfd73c99f7947bb01	k__Bacteria; p__Firmicutes; c__Clostridia; o__Clostridiales
41a64a548fe9394e6aab625591a9b519	k__Bacteria; p__Firmicutes; c__Clostridia; o__Clostridiales; f__Lachnospiraceae; g__; s__
41a9b243334802641ac6fec70885524e	k__Bacteria; p__Firmicutes; c__Bacilli; o__Bacillales; f__Thermoactinomycetaceae
41aaca7132053b9a5741226874233498	k__Bacteria; p__Firmicutes; c__Clostridia; o__Clostridiales; f__; g__; s__
41ad1b84a3d3d4d10f4e70024b86cf2d	k__Bacteria; p__Proteobacteria; c__Gammaproteobacteria; o__Pseudomonadales; f__Pseudomonadaceae; g__Pseudomonas
41b523a69bcd08d9832754e37034d59d	k__Bacteria; p__Firmicutes; c__Clostridia; o__Clostridiales; f__Ruminococcaceae; g__Clostridium
41ea95a8f09aa5ba76f75119d92d909e	k__Bacteria; p__Bacteroidetes; c__Bacteroidia; o__Bacteroidales; f__Prevotellaceae; g__Prevotella; s__pallens
41f3f39a0335a7392afa80327caf0f77	k__Bacteria; p__Firmicutes; c__Clostridia; o__Clostridiales; f__[Tissierellaceae]; g__Anaerococcus; s__
41f5c878cebd5919bf3ec822bcda3aa7	k__Bacteria; p__Firmicutes; c__Clostridia; o__Clostridiales; f__; g__; s__
4211d33cb29b5c4004ad1833376ea1d5	k__Bacteria; p__Firmicutes; c__Clostridia; o__Clostridiales; f__Ruminococcaceae; g__; s__
422bf74f3c997306730ef1858c8edcb3	k__Bacteria; p__Actinobacteria; c__Coriobacteriia; o__Coriobacteriales; f__Coriobacteriaceae; g__Adlercreutzia; s__
422c58e543d2fb5740d292b1a32ac533	k__Bacteria; p__Firmicutes; c__Clostridia; o__Clostridiales; f__; g__; s__
42672ed75c4395a53b44946cb4e70588	k__Bacteria; p__Firmicutes; c__Clostridia; o__Clostridiales; f__[Tissierellaceae]; g__Anaerococcus; s__
426a58d7fde254d8ff01fac25e36ff0e	k__Bacteria; p__Bacteroidetes; c__Bacteroidia; o__Bacteroidales; f__[Paraprevotellaceae]; g__[Prevotella]; s__
427ae0a31574f89e592eb8e5390620fa	k__Bacteria; p__Proteobacteria; c__Gammaproteobacteria; o__Pseudomonadales; f__Pseudomonadaceae; g__Pseudomonas
428c6b7b0ae8807a21ece0b1767057f5	k__Bacteria; p__Tenericutes; c__Mollicutes; o__RF39; f__; g__; s__
428e4a80a1e14a59d72810a32f62f434	k__Bacteria; p__Proteobacteria; c__Gammaproteobacteria; o__Pseudomonadales; f__Pseudomonadaceae; g__Pseudomonas; s__
429324f3276429ca222cdc0eb993f08d	k__Bacteria; p__Firmicutes; c__Clostridia; o__Clostridiales; f__Ruminococcaceae; g__Ruminococcus; s__
4296a5187e821cfd8b0c10de6092f96c	k__Bacteria; p__Firmicutes; c__Clostridia; o__Clostridiales; f__; g__; s__
42b19649d05c98ef9fb16195a409b87c	k__Bacteria; p__Firmicutes; c__Clostridia; o__Clostridiales; f__Lachnospiraceae; g__; s__
42e78c1b836453265805da7c63e5b1d3	k__Bacteria; p__Firmicutes; c__Bacilli; o__Lactobacillales; f__Streptococcaceae; g__Streptococcus; s__
42fac685929ab4861c6e556e43d8d70f	k__Bacteria; p__Proteobacteria; c__Betaproteobacteria; o__Burkholderiales; f__Burkholderiaceae; g__Burkholderia; s__andropogonis
431af0992298030f9be141858f6eee88	k__Bacteria; p__Proteobacteria; c__Alphaproteobacteria; o__Sphingomonadales; f__Sphingomonadaceae; g__Sphingomonas; s__
431b7a050a85f69cfcb3d5bb614a02e9	k__Bacteria; p__Tenericutes; c__Mollicutes; o__RF39; f__; g__; s__
43317f3235102f3d0c718a0255a2df89	k__Bacteria; p__Firmicutes; c__Clostridia; o__Clostridiales; f__Lachnospiraceae; g__Roseburia; s__faecis
4337fd19402bee70bacc78cda62ecfb5	k__Bacteria; p__Actinobacteria; c__Actinobacteria; o__Actinomycetales; f__Streptomycetaceae; g__Streptomyces; s__
433ec68e343c6bb9e64fb57acc6d3f99	k__Bacteria; p__Firmicutes; c__Clostridia; o__Clostridiales; f__[Mogibacteriaceae]; g__; s__
435ca167fadec0210e7c92de61908eff	k__Bacteria; p__Firmicutes; c__Clostridia; o__Clostridiales; f__Ruminococcaceae; g__; s__
435d2d09858717a8ab9c440e4e630318	k__Bacteria; p__Proteobacteria; c__Alphaproteobacteria; o__Rhizobiales; f__Xanthobacteraceae; g__Ancylobacter; s__
436bafc90e0db521b85f30feaf547699	k__Bacteria; p__Proteobacteria; c__Alphaproteobacteria; o__Rhizobiales; f__Methylocystaceae; g__Methylopila; s__
437eb082d1afc1cf446dd004bb3c54a9	k__Bacteria; p__Firmicutes; c__Clostridia; o__Clostridiales; f__Veillonellaceae; g__Sporomusa; s__
437fc6374f44abe31767f8ec56751e59	k__Bacteria; p__Firmicutes; c__Bacilli; o__Lactobacillales; f__Streptococcaceae; g__Streptococcus; s__
4380abc163ecefa354d7002925971253	k__Bacteria; p__Firmicutes; c__Clostridia; o__Clostridiales; f__Lachnospiraceae; g__; s__
43922966b47167f3ea7d8e946392c166	k__Bacteria; p__Firmicutes; c__Clostridia; o__Clostridiales
43943a85d288480493bd5e699c6d6abb	k__Bacteria; p__Actinobacteria; c__Actinobacteria; o__Actinomycetales; f__Cellulomonadaceae; g__Cellulomonas; s__
43a8ea1c851ab2ea9da78b97a4ac34ab	k__Bacteria; p__Firmicutes; c__Clostridia; o__Clostridiales
43d248a62ce36537d3d5f286b2f64b68	k__Bacteria; p__Actinobacteria; c__Actinobacteria; o__Actinomycetales; f__Microbacteriaceae; g__Agromyces; s__
43d92c68f4fb583d0c801715505567c9	k__Bacteria; p__Proteobacteria; c__Gammaproteobacteria; o__Xanthomonadales; f__Xanthomonadaceae; g__Xanthomonas
43de67e7f1c2806d834b1bc6b5cd56a9	k__Bacteria; p__Firmicutes; c__Clostridia; o__Clostridiales; f__Lachnospiraceae
43f8d1ced946461f54ea0b5b7001d5d6	k__Bacteria; p__Actinobacteria; c__Actinobacteria; o__Actinomycetales; f__Microbacteriaceae
43fddf1528d4a98928fd8c3a8ac23bfd	k__Bacteria; p__Proteobacteria; c__Gammaproteobacteria; o__Pseudomonadales; f__Pseudomonadaceae; g__Pseudomonas; s__fragi
4406776e3ae60cb4f5a9591443bc7f3d	k__Bacteria; p__Proteobacteria; c__Gammaproteobacteria; o__Legionellales; f__Coxiellaceae; g__; s__
44133ba0a919858947f24b2d9559dff6	k__Bacteria; p__Firmicutes; c__Clostridia; o__Clostridiales; f__; g__; s__
4422afa5e085d3e4373b56dd5c28160d	k__Bacteria; p__Firmicutes; c__Clostridia; o__Clostridiales; f__Lachnospiraceae; g__; s__
44396f15b10f6577d61a11c6047c939f	k__Archaea; p__Euryarchaeota; c__Methanobacteria; o__Methanobacteriales; f__Methanobacteriaceae; g__Methanobrevibacter; s__
443a4131616d655367f22b895e99da07	k__Bacteria; p__Proteobacteria; c__Alphaproteobacteria; o__Rickettsiales; f__; g__; s__
443f8e3f8f434a3604951d2d0a6f62c8	k__Bacteria; p__Firmicutes; c__Clostridia; o__Clostridiales; f__Lachnospiraceae; g__Coprococcus; s__
44617e596cc9489738060db649cd3673	k__Bacteria; p__Firmicutes; c__Clostridia; o__Clostridiales; f__; g__; s__
446b888f8119b56e60b68ad01e3dd288	k__Bacteria; p__Firmicutes; c__Clostridia; o__Clostridiales; f__Ruminococcaceae; g__; s__
4470b85b9be6171073e3f9aecbfdb32b	k__Bacteria; p__Acidobacteria; c__Acidobacteriia; o__Acidobacteriales; f__Acidobacteriaceae; g__Terriglobus; s__
4473ac847f597164696bc96da74ca753	k__Bacteria; p__Proteobacteria; c__Alphaproteobacteria; o__Rhizobiales; f__; g__; s__
44874ec1d5845f9dfe821e4a07d75b60	k__Bacteria; p__Bacteroidetes; c__Bacteroidia; o__Bacteroidales; f__Prevotellaceae; g__Prevotella; s__
4492278b3eb603caeb0b85f0481911e2	k__Bacteria; p__Firmicutes; c__Clostridia; o__Clostridiales; f__Veillonellaceae; g__Pelosinus; s__
4499bd8fc7fb01c27fedacc7cd55ff04	k__Bacteria; p__Firmicutes; c__Bacilli; o__Bacillales; f__Paenibacillaceae; g__Paenibacillus; s__
44a052435b4fc464bea9dd4f3304d6ea	k__Bacteria; p__Proteobacteria; c__Alphaproteobacteria; o__Rickettsiales; f__mitochondria; g__Acanthamoeba; s__polyphaga
44ae66c9eda691f131b89a01b6f703b7	k__Bacteria; p__Firmicutes; c__Bacilli; o__Bacillales; f__Paenibacillaceae; g__Brevibacillus
44e2e882531882ca32cf9a5358e6ba34	k__Bacteria; p__Firmicutes; c__Clostridia; o__Clostridiales; f__Lachnospiraceae
44ecb6f24e49641321dbfcb7f4198dbb	k__Bacteria; p__Firmicutes; c__Clostridia; o__Clostridiales; f__; g__; s__
44edfdeeec419169e3560510f9d0ccc3	k__Bacteria; p__Actinobacteria; c__Actinobacteria; o__Actinomycetales; f__Streptomycetaceae; g__Streptomyces; s__
44fd476d5c1935d5dc78382739fa0b7b	k__Bacteria; p__Firmicutes; c__Clostridia; o__Clostridiales
4505f1df845d000261c4fb299a4c8937	k__Bacteria; p__Proteobacteria; c__Gammaproteobacteria; o__Enterobacteriales; f__Enterobacteriaceae
4515e9b5d45c796c7f02cad4ac9ae090	k__Bacteria; p__Bacteroidetes; c__Bacteroidia; o__Bacteroidales; f__Prevotellaceae; g__Prevotella; s__pallens
451e3fd380159c206ca033989a5fb4d2	k__Bacteria; p__Proteobacteria; c__Betaproteobacteria; o__Burkholderiales; f__Burkholderiaceae; g__Burkholderia; s__andropogonis
4526e031c13c27cd573f825ef229ee0e	k__Bacteria; p__Firmicutes; c__Clostridia; o__Clostridiales; f__Lachnospiraceae; g__; s__
452e8489334d0ba0cf7eeccea28f1364	k__Bacteria; p__Firmicutes; c__Clostridia; o__Clostridiales; f__Lachnospiraceae; g__[Ruminococcus]; s__
453cf07d3e96e304f23fbde7b355fe70	k__Bacteria; p__Actinobacteria; c__Actinobacteria; o__Actinomycetales; f__Microbacteriaceae; g__Frigoribacterium; s__
454ff5fa8a3c6b293cea935aeb9cfb8e	k__Bacteria; p__Firmicutes; c__Clostridia; o__Clostridiales; f__Clostridiaceae
455219eeb206cd432bf64f51159e0b4c	k__Bacteria; p__Actinobacteria; c__Actinobacteria; o__Actinomycetales; f__Corynebacteriaceae; g__Corynebacterium; s__durum
45547dbe901a2ecf32fc3c97f9f11938	k__Bacteria; p__Firmicutes; c__Bacilli; o__Bacillales; f__Paenibacillaceae; g__Paenibacillus; s__
4556221eff72c8c09fe327223386fa99	k__Bacteria; p__Firmicutes; c__Clostridia; o__OPB54; f__; g__; s__
455a9a2bb7457d545db54f34cb83599a	k__Bacteria; p__Firmicutes; c__Clostridia; o__Clostridiales; f__Lachnospiraceae; g__; s__
455d6df6969dfd0caad7b9ae9ad84353	k__Bacteria; p__Firmicutes; c__Clostridia; o__Clostridiales; f__Lachnospiraceae; g__Moryella; s__
455d87729b6b28e62ff83d2ef06d235c	k__Bacteria; p__Firmicutes; c__Clostridia; o__Clostridiales; f__[Mogibacteriaceae]; g__; s__
45666a3d1fc6c6eddbb3a19a06d0f0bc	k__Bacteria; p__Firmicutes; c__Clostridia; o__Clostridiales; f__Veillonellaceae; g__Selenomonas; s__
456883629e5b1aa64c8c22fd8473c0b1	k__Bacteria; p__Proteobacteria; c__Gammaproteobacteria; o__Xanthomonadales; f__Xanthomonadaceae; g__Luteibacter; s__rhizovicinus
458c64c18180f20a3831b6459bf7b86c	k__Bacteria; p__Bacteroidetes; c__Sphingobacteriia; o__Sphingobacteriales; f__Sphingobacteriaceae; g__Olivibacter; s__
45914cb316d81a90de12c69ee6f13989	k__Bacteria; p__Firmicutes; c__Clostridia; o__Clostridiales; f__Ruminococcaceae; g__Ruminococcus; s__bromii
4598e7db6dff8f019ff4f6c50dc05df4	k__Bacteria; p__Firmicutes; c__Clostridia; o__Clostridiales; f__Lachnospiraceae; g__Dorea; s__
45b0071e46e11ae5dad2f2c4717ab430	k__Bacteria; p__Proteobacteria; c__Betaproteobacteria; o__Burkholderiales; f__Burkholderiaceae; g__Burkholderia; s__andropogonis
45b76e49b6500d8d245c2f27f6fbb143	k__Bacteria; p__Firmicutes; c__Erysipelotrichi; o__Erysipelotrichales; f__Erysipelotrichaceae; g__Clostridium; s__cocleatum
45c80843dac191f771b11018ff90d94c	k__Bacteria; p__Firmicutes; c__Clostridia; o__Clostridiales; f__Ruminococcaceae; g__Ruminococcus; s__callidus
45caad402b9b730d45b06069ab7ee566	k__Bacteria; p__Firmicutes; c__Bacilli; o__Lactobacillales; f__Lactobacillaceae; g__Lactobacillus; s__zeae
45d0578b3bbcad401d9d38f7c27f6ca8	k__Bacteria; p__Actinobacteria; c__Actinobacteria; o__Actinomycetales; f__Brevibacteriaceae; g__Brevibacterium; s__
45d4fe3f6c01f77c2dfc11dd91d3359a	k__Bacteria; p__Firmicutes; c__Bacilli; o__Lactobacillales; f__Lactobacillaceae; g__Lactobacillus; s__salivarius
45d66bdfc1b5de03935822e9c9bf2a74	k__Bacteria; p__Firmicutes; c__Clostridia; o__Clostridiales; f__Veillonellaceae; g__Selenomonas; s__
45e3696d78d57fc35094a6cf67e6414b	k__Bacteria; p__Firmicutes; c__Bacilli; o__Bacillales; f__Paenibacillaceae; g__Paenibacillus; s__
45ec8d8b3f3f833abb943a394602ca67	k__Bacteria; p__Firmicutes; c__Clostridia; o__Clostridiales
4608fae4bbc9964cdd17af8782f2155e	k__Bacteria; p__Proteobacteria; c__Betaproteobacteria; o__Burkholderiales; f__Oxalobacteraceae
46145175bf1b3232ae04bcf2557f82ca	k__Bacteria; p__Firmicutes; c__Clostridia; o__Clostridiales; f__Lachnospiraceae; g__Lachnoanaerobaculum; s__orale
461578efd6f6e811eb812d1582e06c26	k__Bacteria; p__Actinobacteria; c__Thermoleophilia; o__Solirubrobacterales; f__Conexibacteraceae; g__Conexibacter; s__
462c6ee86ad2afe9e10ac592a196effa	k__Bacteria; p__Tenericutes; c__Mollicutes; o__RF39; f__; g__; s__
464c7bfbe92326eb617a67e4aa265765	k__Bacteria; p__Proteobacteria; c__Alphaproteobacteria; o__Rhizobiales; f__Bradyrhizobiaceae
465666410c14140e1fb545aa049b4011	k__Bacteria; p__Firmicutes; c__Bacilli; o__Bacillales; f__Bacillaceae; g__; s__
46657ae4f41a8698acc0120d529a4338	k__Bacteria; p__Actinobacteria; c__Coriobacteriia; o__Coriobacteriales; f__Coriobacteriaceae; g__Slackia; s__
466f240b16ae7967d70c0d1c09d52b3d	k__Bacteria; p__Firmicutes; c__Clostridia; o__Clostridiales; f__Lachnospiraceae; g__; s__
46ad18b4f83a60d836b6385fe71c94b5	k__Bacteria; p__Proteobacteria; c__Alphaproteobacteria; o__Sphingomonadales; f__Sphingomonadaceae; g__Sphingobium; s__
46be5038d840b831584bb45c945f3434	k__Bacteria; p__Fusobacteria; c__Fusobacteriia; o__Fusobacteriales; f__Leptotrichiaceae; g__Leptotrichia; s__
46d0140db33b2076cfcb681d8ae1ca9c	k__Bacteria; p__Proteobacteria; c__Alphaproteobacteria; o__Sphingomonadales; f__Sphingomonadaceae; g__Sphingomonas; s__wittichii
46db2451a01b37c2a6654e54c42b0807	k__Bacteria; p__Firmicutes; c__Clostridia; o__Clostridiales; f__Lachnospiraceae; g__Dorea; s__formicigenerans
46e9544e9c5e7ed6d90a7b50a8a9c990	k__Bacteria; p__Firmicutes; c__Clostridia; o__Clostridiales; f__[Tissierellaceae]; g__Anaerococcus; s__
46eeb2a0a21ad13a232b2e7943a35a8e	k__Bacteria; p__Proteobacteria; c__Betaproteobacteria; o__Burkholderiales; f__Burkholderiaceae; g__Burkholderia; s__bryophila
46f0ee51310d89d76b4c19557925d01d	k__Bacteria; p__Actinobacteria; c__Actinobacteria; o__Actinomycetales; f__Microbacteriaceae
46fd8999fe228ac830ed06856c86ea7e	k__Bacteria; p__Actinobacteria; c__Actinobacteria; o__Actinomycetales; f__Micrococcaceae; g__Microbispora; s__rosea
46fedfb775fe1f9c81e2cfe64f674d6c	k__Bacteria; p__Actinobacteria; c__Actinobacteria; o__Actinomycetales; f__Micromonosporaceae; g__Actinocatenispora; s__
470f3934602ebeec438e4a2cd41519f9	k__Bacteria; p__Firmicutes; c__Bacilli; o__Lactobacillales; f__Aerococcaceae; g__Aerococcus; s__
47138116bc7191f5a6a75af2efece04a	k__Bacteria; p__Firmicutes; c__Bacilli; o__Lactobacillales; f__Aerococcaceae; g__Alloiococcus; s__
47232e94b8b4b8b407dbde1b6f214466	k__Bacteria; p__Firmicutes; c__Clostridia; o__Clostridiales; f__; g__; s__
472b81ee17a92ee1c4903942521c715e	k__Bacteria; p__Firmicutes; c__Clostridia; o__Clostridiales; f__; g__; s__
473c8d0e5e54467fd78fcc22c8516ae4	k__Bacteria; p__Firmicutes; c__Clostridia; o__Clostridiales; f__Peptostreptococcaceae; g__[Clostridium]; s__bifermentans
474605aafcd4d400dd107901071cc9cd	k__Bacteria; p__Firmicutes; c__Clostridia; o__Clostridiales; f__Ruminococcaceae; g__Ruminococcus; s__
476a27c3796dfc1790e181f789663a33	k__Bacteria; p__Firmicutes; c__Clostridia; o__Clostridiales
47845e628f9b9b82d4661a2464c726fb	k__Bacteria; p__Proteobacteria; c__Alphaproteobacteria; o__Rhizobiales; f__Phyllobacteriaceae; g__Aminobacter; s__
4792572862cc565d3328515f68f9bcbb	k__Bacteria; p__Firmicutes; c__Clostridia; o__Clostridiales
47cec00cfc37ef99796e516321aa0925	k__Bacteria; p__Firmicutes; c__Clostridia; o__Clostridiales; f__Lachnospiraceae
47dc10a980d3fa684cc09595af683e05	k__Bacteria; p__Bacteroidetes; c__Sphingobacteriia; o__Sphingobacteriales; f__Sphingobacteriaceae; g__; s__
47e13091f9b856dd252c464f286697a9	k__Bacteria; p__Firmicutes; c__Clostridia; o__Clostridiales; f__Lachnospiraceae; g__Blautia; s__
47ee012e6bf01ba25c1e9d73e2241846	k__Bacteria; p__Actinobacteria; c__Actinobacteria; o__Actinomycetales; f__Promicromonosporaceae; g__Promicromonospora; s__
47f61b65b87fe2de661f6b8ba41cddea	k__Bacteria; p__Firmicutes; c__Clostridia; o__Clostridiales; f__Ruminococcaceae; g__Oscillospira; s__
47f702321f4abba7ffaa9ae375f8713f	k__Bacteria; p__Firmicutes; c__Bacilli; o__Lactobacillales; f__Leuconostocaceae
47fe5b9eeaad17c139e39a16068f34f6	k__Bacteria; p__Actinobacteria; c__Actinobacteria; o__Actinomycetales; f__Cellulomonadaceae
47ffcdebfe0460a0d3975256d2eff7c7	k__Bacteria; p__Firmicutes; c__Clostridia; o__Clostridiales; f__Ruminococcaceae; g__; s__
48120f2d28136884787660eb4953652a	k__Bacteria; p__Firmicutes; c__Clostridia; o__Clostridiales; f__Ruminococcaceae; g__Oscillospira; s__
482ddb9d4a2b6728ce3cfb21fc978743	k__Bacteria; p__Firmicutes; c__Clostridia; o__Clostridiales; f__Lachnospiraceae
482de852f8d56dd0299dc36f2582a284	k__Bacteria; p__Bacteroidetes; c__Bacteroidia; o__Bacteroidales; f__Prevotellaceae; g__Prevotella; s__
4830e95dd9e662f12faaa55eff27cfb1	k__Bacteria; p__Firmicutes; c__Clostridia; o__Clostridiales
485b61658eddfbbe67e757221b0d8ab6	k__Bacteria; p__Bacteroidetes; c__Bacteroidia; o__Bacteroidales; f__Prevotellaceae; g__Prevotella; s__
4865e5f5443354ec907c89bfcdffa20f	k__Bacteria; p__Firmicutes; c__Bacilli; o__Bacillales; f__Staphylococcaceae; g__Staphylococcus
486cb990a92b48aa4779296d1883dab3	k__Bacteria; p__Proteobacteria; c__Betaproteobacteria; o__Burkholderiales; f__Comamonadaceae; g__Hydrogenophaga; s__
48782307120574c67aaa25ec7ce686ba	k__Bacteria; p__Firmicutes; c__Bacilli; o__Bacillales; f__Bacillaceae; g__Bacillus; s__
488938b5323911713cac3265fcaf41d9	k__Bacteria; p__Firmicutes; c__Bacilli; o__Bacillales; f__Paenibacillaceae; g__Paenibacillus
48c8b4dea08fa6ac0f72b3a2e02c5a11	k__Bacteria; p__Firmicutes; c__Clostridia; o__Clostridiales; f__; g__; s__
48dbe7849f7a83467a6411762f7fcb21	k__Bacteria; p__Firmicutes; c__Bacilli; o__Lactobacillales; f__Lactobacillaceae; g__Lactobacillus; s__
48f0d876ee2f7c66d30de34394361f0b	k__Bacteria; p__Proteobacteria; c__Betaproteobacteria; o__Neisseriales; f__Neisseriaceae; g__Neisseria; s__subflava
4904f1400675d736d2c8a9203b8d5695	k__Bacteria; p__Actinobacteria; c__Actinobacteria; o__Actinomycetales; f__Pseudonocardiaceae; g__Saccharopolyspora; s__
490ba451d0fa6e68d69f72048514f0a9	k__Bacteria; p__Firmicutes; c__Clostridia; o__Clostridiales; f__; g__; s__
491e59ee14d3371129a4d421531bb48a	k__Bacteria; p__Firmicutes; c__Clostridia; o__Clostridiales; f__[Mogibacteriaceae]; g__; s__
4936196363e4368f6bc17b13cb8ac364	k__Bacteria; p__Firmicutes; c__Clostridia; o__Clostridiales; f__Lachnospiraceae
49542b70535b5b25483a9220abd05093	k__Bacteria; p__Firmicutes; c__Clostridia; o__Clostridiales; f__; g__; s__
496296840f28ab301a656a44ae280195	k__Bacteria; p__Firmicutes; c__Clostridia; o__Clostridiales; f__Lachnospiraceae
4962ae468566bcbbe7a327ca3ce7c8fe	k__Bacteria; p__Bacteroidetes; c__Bacteroidia; o__Bacteroidales; f__Prevotellaceae; g__Prevotella; s__
4964141308578d4913d5a684a8fd7357	k__Bacteria; p__Actinobacteria; c__Coriobacteriia; o__Coriobacteriales; f__Coriobacteriaceae; g__Collinsella; s__aerofaciens
496be2d210dadc9723725e586504080a	k__Bacteria; p__Bacteroidetes; c__Bacteroidia; o__Bacteroidales; f__Bacteroidaceae; g__Bacteroides; s__uniformis
496d7f479392def9414da33c9137e40a	k__Bacteria; p__Firmicutes; c__Clostridia; o__Clostridiales; f__Lachnospiraceae; g__[Ruminococcus]; s__gnavus
496ecde24f9ab698992413d3d4f04b5f	k__Bacteria; p__Proteobacteria; c__Gammaproteobacteria; o__Xanthomonadales; f__Xanthomonadaceae; g__Stenotrophomonas; s__maltophilia
497a0a0b3330ba0c4cbb1f5d8f3fac8e	k__Bacteria; p__Firmicutes; c__Clostridia; o__Clostridiales; f__Veillonellaceae; g__Veillonella; s__
497a26126c9e726c768bdec79e8c4e9b	k__Bacteria; p__Actinobacteria; c__Actinobacteria; o__Actinomycetales; f__Microbacteriaceae; g__Curtobacterium; s__
497b508cc1037ff4f7df475f55d29a26	k__Bacteria; p__Firmicutes; c__Clostridia; o__Clostridiales; f__Peptococcaceae; g__Desulfosporosinus; s__meridiei
49922008d444c26c637292c43da76b07	k__Bacteria; p__Firmicutes; c__Clostridia; o__Clostridiales; f__Lachnospiraceae; g__; s__
49a23fbbd3beefbcc2f10c581bd44d01	k__Bacteria; p__Tenericutes; c__Mollicutes; o__RF39; f__; g__; s__
49a69069a820c36293aca9397f8ac24c	k__Bacteria; p__Firmicutes; c__Clostridia; o__Clostridiales; f__Ruminococcaceae; g__Oscillospira; s__
49c8131fd07c6f96f76a26513b37eb43	k__Bacteria; p__Firmicutes; c__Clostridia; o__Clostridiales; f__Lachnospiraceae; g__; s__
49cf83373617b1bd5b0f4f465e22ed10	k__Bacteria; p__Firmicutes; c__Clostridia; o__Clostridiales; f__Lachnospiraceae; g__Coprococcus; s__
49d7e138b88f8bc13e7a208bb88d56a8	k__Bacteria; p__Actinobacteria; c__Actinobacteria; o__Actinomycetales; f__Microbacteriaceae
49e1183af37a7ef1ec0c232ef17fb88d	k__Bacteria; p__Firmicutes; c__Clostridia; o__Clostridiales; f__Christensenellaceae; g__; s__
49e35f1abefaaf61b399b0cbce287852	k__Bacteria; p__Firmicutes; c__Clostridia; o__Clostridiales; f__Christensenellaceae; g__; s__
49f77549cbfeb9beb48f661ba04ea96a	k__Bacteria; p__Proteobacteria; c__Alphaproteobacteria; o__Sphingomonadales; f__Erythrobacteraceae; g__; s__
4a0a6f207e0aa35570e56f5c2b39502e	k__Bacteria; p__Actinobacteria; c__Actinobacteria; o__Actinomycetales; f__Microbacteriaceae
4a0c99b95f0829fa282cc9d85aa49fcb	k__Bacteria; p__Firmicutes; c__Clostridia; o__Clostridiales; f__; g__; s__
4a18a1d53a306f1926766f6abbc96d12	k__Bacteria; p__Firmicutes; c__Bacilli; o__Bacillales; f__Paenibacillaceae; g__Paenibacillus
4a1c5fb315646700069f4c358a196b9f	k__Bacteria; p__Firmicutes; c__Clostridia; o__Clostridiales; f__[Mogibacteriaceae]; g__; s__
4a1e5e44473fcf41f308288148927289	k__Bacteria; p__Proteobacteria; c__Betaproteobacteria; o__Neisseriales; f__Neisseriaceae; g__; s__
4a2076eab6e4231c246eded0f7131765	k__Bacteria; p__Firmicutes; c__Clostridia; o__Clostridiales; f__Peptococcaceae; g__; s__
4a29497377d879628de55dc012d334f2	k__Bacteria; p__Proteobacteria; c__Alphaproteobacteria; o__Sphingomonadales; f__Sphingomonadaceae; g__Sphingomonas; s__
4a295fd967fdb65bfbe818ff9827691d	k__Bacteria; p__Actinobacteria; c__Actinobacteria; o__Actinomycetales; f__Nocardiopsaceae; g__; s__
4a3eb01cd111089f7bf9fba6a3cbf83f	k__Bacteria; p__Fusobacteria; c__Fusobacteriia; o__Fusobacteriales; f__Leptotrichiaceae; g__Leptotrichia; s__
4a53799ac9b0f6e29d87e622267eeb8e	k__Bacteria; p__Proteobacteria; c__Alphaproteobacteria; o__Sphingomonadales; f__Sphingomonadaceae; g__Novosphingobium
4a6c51ff52889e0cfbb7665f38b1a1a6	k__Bacteria; p__Cyanobacteria; c__Chloroplast; o__Streptophyta; f__; g__; s__
4a6feebc6529ea1d4fe69492d45d4f34	k__Bacteria; p__Firmicutes; c__Bacilli; o__Bacillales; f__Staphylococcaceae; g__Staphylococcus; s__sciuri
4a77a63c9d17fb6f14ed52f2d10da0ad	k__Bacteria; p__Firmicutes; c__Clostridia; o__Clostridiales; f__Ruminococcaceae; g__; s__
4aa4d03f7a110fd8dd145882bfcfbb5a	k__Bacteria; p__Firmicutes; c__Clostridia; o__Clostridiales; f__Ruminococcaceae; g__Butyricicoccus; s__pullicaecorum
4aafa345dd93f4427c2cf15bed1ec0d4	k__Bacteria; p__Proteobacteria; c__Alphaproteobacteria; o__Rhodospirillales; f__Acetobacteraceae; g__Acidocella; s__
4ac5de6617d5b4d5201a8d2d98c785e7	k__Bacteria; p__Firmicutes; c__Clostridia; o__Clostridiales; f__Ruminococcaceae; g__; s__
4acd3f1884d7721bdb7857152d9898f1	k__Bacteria; p__Firmicutes; c__Clostridia; o__Clostridiales; f__; g__; s__
4ad0fb5fe1bf702d971cd3c3fe0ad2d3	k__Bacteria; p__Firmicutes; c__Clostridia; o__Clostridiales; f__Lachnospiraceae
4adec2379463e4abc5c9d855802af4f8	k__Bacteria; p__Proteobacteria; c__Betaproteobacteria; o__Burkholderiales; f__Alcaligenaceae; g__Achromobacter; s__
4ae33466f29277f3cba0834c894ee4a4	k__Bacteria; p__Firmicutes; c__Clostridia; o__Clostridiales; f__; g__; s__
4aea2f17e8ecfe3663f8171b4ca0ded2	k__Bacteria; p__Firmicutes; c__Clostridia; o__Clostridiales; f__Ruminococcaceae; g__Oscillospira; s__
4af869b05de665fb7ae9a4fac6050be2	k__Bacteria; p__Firmicutes; c__Erysipelotrichi; o__Erysipelotrichales; f__Erysipelotrichaceae; g__; s__
4afbf45f017f69e11e9987ce9b6181c6	k__Bacteria; p__Firmicutes; c__Clostridia; o__Clostridiales; f__; g__; s__
4b0df6140f82e86f6718a3c221725edf	k__Bacteria; p__Firmicutes; c__Bacilli; o__Bacillales; f__Thermoactinomycetaceae
4b3fc5de9758cf6cdb010bd41d101a65	k__Bacteria; p__Firmicutes; c__Clostridia; o__Clostridiales; f__Lachnospiraceae; g__[Ruminococcus]; s__gnavus
4b4f7e13c0f76f9a0d8d5f1f53aec9ba	k__Bacteria; p__Fusobacteria; c__Fusobacteriia; o__Fusobacteriales; f__Fusobacteriaceae; g__Fusobacterium; s__
4b505966248d00e36f110c01e16bbfc1	k__Bacteria; p__Firmicutes; c__Clostridia; o__Clostridiales
4b52bf5b0349aaca04cdbbe2e21f1dd8	k__Bacteria; p__Firmicutes; c__Bacilli; o__Turicibacterales; f__Turicibacteraceae; g__Turicibacter; s__
4b66127559d2be02ee3bbe0181834938	k__Bacteria; p__Firmicutes; c__Bacilli; o__Bacillales; f__Bacillaceae; g__Bacillus; s__clausii
4b8139ad435fbc969c60b47153d64a5a	k__Bacteria; p__Firmicutes; c__Clostridia; o__Clostridiales
4b88bf9547940c6d87645a9609155c40	k__Bacteria; p__Firmicutes; c__Clostridia; o__Clostridiales; f__Lachnospiraceae
4b8d93420ca7967730a1e7dde75b1bdb	k__Bacteria; p__Firmicutes; c__Clostridia; o__Clostridiales; f__Lachnospiraceae; g__; s__
4b961b84716ac167392b11929d702643	k__Bacteria; p__Proteobacteria; c__Alphaproteobacteria; o__Sphingomonadales; f__Sphingomonadaceae; g__Novosphingobium; s__
4b98b61d5285dfe8dfcb808dcce25366	k__Bacteria; p__Actinobacteria; c__Actinobacteria; o__Actinomycetales; f__Streptomycetaceae
4bcafb49c38dbe6b08a6a87cc69e6cbc	k__Bacteria; p__Firmicutes; c__Bacilli; o__Bacillales; f__Paenibacillaceae; g__Paenibacillus; s__hodogayensis
4bd01f90398375480101204bbcdd2ceb	k__Bacteria; p__Firmicutes; c__Clostridia; o__Clostridiales; f__Ruminococcaceae
4bd87ea6cbe719afcb0fc9954252752a	k__Bacteria; p__Actinobacteria; c__Actinobacteria; o__Actinomycetales; f__Pseudonocardiaceae; g__Thermobispora; s__bispora
4bdb78f927eb2b5f0694e5c5586cdc71	k__Bacteria; p__Firmicutes; c__Clostridia; o__Clostridiales; f__Lachnospiraceae; g__Oribacterium; s__
4bdbaae586dedec92168f93266de0979	k__Bacteria; p__Firmicutes; c__Clostridia; o__Clostridiales; f__; g__; s__
4c4ebc04dce1f0c69e0efd280061b1fe	k__Bacteria; p__Proteobacteria; c__Alphaproteobacteria; o__Rhizobiales; f__Hyphomicrobiaceae; g__; s__
4c515112a89c446f36fe319af3db4b8e	k__Bacteria; p__Bacteroidetes; c__Bacteroidia; o__Bacteroidales; f__[Paraprevotellaceae]; g__[Prevotella]; s__
4c54a4e99946d4625093e920488ac996	k__Bacteria; p__Firmicutes; c__Clostridia; o__Clostridiales; f__Veillonellaceae; g__Veillonella; s__parvula
4c672a29773d9e2df4403ba1e0078068	k__Bacteria; p__Firmicutes; c__Clostridia; o__Clostridiales
4c6e06248846af8878fdd00496c85610	k__Bacteria; p__Firmicutes; c__Bacilli; o__Bacillales; f__Thermoactinomycetaceae; g__Thermoactinomyces; s__sanguinis
4c9d957821adb13269e4e5f64385a236	k__Bacteria; p__Bacteroidetes; c__Flavobacteriia; o__Flavobacteriales; f__[Weeksellaceae]; g__; s__
4cbf65d11ea164bdeca7393329ca48ef	k__Bacteria; p__Proteobacteria; c__Alphaproteobacteria; o__Rhizobiales; f__Methylocystaceae; g__Methylopila; s__
4cbfff144d4e7a4e0f4619ed505be070	k__Bacteria; p__Proteobacteria; c__Gammaproteobacteria; o__Enterobacteriales; f__Enterobacteriaceae
4cc4ec9fa88324b6fbd7fc208295810d	k__Bacteria; p__Firmicutes; c__Clostridia; o__Clostridiales; f__Lachnospiraceae; g__; s__
4cca3c3fed7ee628fc7001d54a1c7209	k__Bacteria; p__Firmicutes; c__Clostridia; o__Clostridiales; f__; g__; s__
4ccc69349cad8440933b70b7f99a31ff	k__Bacteria; p__Firmicutes; c__Bacilli; o__Lactobacillales; f__Streptococcaceae; g__Streptococcus; s__minor
4cdb8ce9c6bcaa653659e0bdb1b393c6	k__Bacteria; p__Proteobacteria; c__Alphaproteobacteria; o__Rhodobacterales; f__Rhodobacteraceae
4d0ac870bafc0615097548941a7439f1	k__Bacteria; p__Actinobacteria; c__Actinobacteria; o__Actinomycetales; f__Streptomycetaceae
4d1a270b6dc6a224e17b2e9aedd3b411	k__Bacteria; p__Fusobacteria; c__Fusobacteriia; o__Fusobacteriales; f__Fusobacteriaceae; g__Fusobacterium; s__
4d261ddd0b21c47f2e4fe38033ba4238	k__Bacteria; p__Firmicutes; c__Clostridia; o__Clostridiales; f__Ruminococcaceae; g__Faecalibacterium
4d333ce3af4091db0a11b3bc498b12e3	k__Bacteria; p__Firmicutes; c__Clostridia; o__Clostridiales; f__Lachnospiraceae; g__; s__
4d3f1d8f02b45e845e419a273f5b2386	k__Bacteria; p__Firmicutes; c__Clostridia; o__Clostridiales; f__Ruminococcaceae; g__Ruminococcus; s__
4d3fae51d0bc69280cb104287ab0d99a	k__Bacteria; p__Firmicutes; c__Clostridia; o__Clostridiales; f__[Mogibacteriaceae]; g__; s__
4d43b94ca7f338c1af7841405b301d78	k__Bacteria; p__Firmicutes; c__Clostridia; o__Clostridiales; f__; g__; s__
4d4d9e5b24de0601d3d3a819479abf2d	k__Bacteria; p__Proteobacteria; c__Alphaproteobacteria; o__Rhizobiales; f__Hyphomicrobiaceae; g__Rhodoplanes; s__
4d53a2830b7d5cd71bf509b03e90a152	k__Bacteria; p__Actinobacteria; c__Actinobacteria; o__Actinomycetales; f__Streptomycetaceae; g__Streptomyces; s__radiopugnans
4d5ed3e6100a5cf55a5bd7ea1c3480b7	k__Bacteria; p__Actinobacteria; c__Actinobacteria; o__Actinomycetales; f__Nocardiopsaceae; g__; s__
4d66095dc3d4d304cbbda87401a583d0	k__Bacteria
4d6f3824157bb4b06d9e8da2b26653e4	k__Bacteria; p__Bacteroidetes; c__Bacteroidia; o__Bacteroidales; f__Porphyromonadaceae; g__Porphyromonas; s__
4d700fe537b1a3c01017e496c3569602	k__Bacteria; p__Proteobacteria; c__Alphaproteobacteria; o__Rhizobiales; f__; g__; s__
4d72007c70f4abc0bf9e8fe8b826d07d	k__Bacteria; p__Proteobacteria; c__Gammaproteobacteria; o__Enterobacteriales; f__Enterobacteriaceae
4d887dbbcf25a86825b7ea380b9c395b	k__Bacteria; p__Firmicutes; c__Clostridia; o__Clostridiales
4da69e6fd69adc72172594130d050f36	k__Bacteria; p__Firmicutes; c__Bacilli; o__Bacillales; f__Paenibacillaceae; g__; s__
4dabc61c0dfe2446850994cdc932d3c8	k__Bacteria; p__Firmicutes; c__Bacilli; o__Lactobacillales; f__Carnobacteriaceae; g__Granulicatella; s__
4dad6b40672b56f23bab23032b654841	k__Bacteria; p__Firmicutes; c__Clostridia; o__Clostridiales; f__[Tissierellaceae]; g__Anaerococcus; s__
4daf6c5fda18023ccb13037753d4d155	k__Bacteria; p__Firmicutes; c__Clostridia; o__Clostridiales; f__Lachnospiraceae
4de4f91d546a02f8dc55f011fe563c9d	k__Bacteria; p__Firmicutes; c__Clostridia; o__Clostridiales; f__Lachnospiraceae
4de8e1bcb1ab4c00902a507bbe3ef9bb	k__Bacteria; p__Firmicutes; c__Clostridia; o__Clostridiales; f__Veillonellaceae; g__; s__
4debdb072999105a06ee39aa8779f01c	k__Bacteria; p__Firmicutes; c__Clostridia; o__Clostridiales; f__; g__; s__
4e00eedae32143a57b64e86d58442345	k__Bacteria; p__Proteobacteria; c__Gammaproteobacteria; o__Enterobacteriales; f__Enterobacteriaceae
4e0a3bce6258e0336d011f6df9ae2864	k__Bacteria; p__Tenericutes; c__Mollicutes; o__RF39; f__; g__; s__
4e0a65b0a2fab7bf0f307d360b679d87	k__Bacteria; p__Firmicutes; c__Clostridia; o__Clostridiales; f__Lachnospiraceae
4e1b35edb04a77f748e24a1ee5f7c084	k__Bacteria; p__Firmicutes; c__Clostridia; o__Clostridiales; f__Ruminococcaceae; g__; s__
4e1bda045e6ba843353281138c649093	k__Bacteria; p__Firmicutes; c__Clostridia; o__Clostridiales
4e2e6735331ad01a30c94d2f4c285dc2	k__Bacteria; p__Firmicutes; c__Clostridia; o__Clostridiales; f__Lachnospiraceae; g__; s__
4e3fd049153d412a7a35783d427e0901	k__Bacteria; p__Firmicutes; c__Erysipelotrichi; o__Erysipelotrichales; f__Erysipelotrichaceae; g__; s__
4e7ba49448e3de74d9238af0586bfea1	k__Bacteria; p__Bacteroidetes; c__Bacteroidia; o__Bacteroidales; f__Prevotellaceae; g__Prevotella; s__pallens
4e86035b3da3cfaa0cac1a8f2e482356	k__Bacteria; p__Actinobacteria; c__Actinobacteria; o__Actinomycetales; f__Actinomycetaceae; g__Actinomyces; s__
4e8d7a4662640b90817f015280cf5713	k__Bacteria; p__Firmicutes; c__Clostridia; o__Clostridiales; f__Clostridiaceae; g__Clostridium; s__butyricum
4eb53a520f214f1caa432f16967223c8	k__Bacteria; p__Firmicutes; c__Clostridia; o__Clostridiales; f__Lachnospiraceae; g__Coprococcus; s__
4eb6ee5ce90cd8b50c71b0d60984461d	k__Bacteria; p__Firmicutes; c__Clostridia; o__Clostridiales
4ec25c484282e077c9a4e1e14d0a9d43	k__Bacteria; p__Actinobacteria; c__Actinobacteria; o__Actinomycetales; f__Corynebacteriaceae; g__Corynebacterium; s__
4ee8eb346a3cc3189fb72179ea7c0825	k__Bacteria; p__Firmicutes; c__Clostridia; o__Clostridiales
4ee8f27496a5b6e01e748db5a5cc67c0	k__Bacteria; p__Bacteroidetes; c__Bacteroidia; o__Bacteroidales; f__[Paraprevotellaceae]; g__[Prevotella]; s__
4ef40ec631485eb074db32aed115a06f	k__Bacteria; p__Actinobacteria; c__Actinobacteria; o__Actinomycetales; f__Micrococcaceae; g__Arthrobacter; s__
4ef4baac19dfb0aa28a387f09f61cb54	k__Bacteria; p__Firmicutes; c__Clostridia; o__Clostridiales; f__Ruminococcaceae; g__Oscillospira; s__
4ef59246f494fd1cd5e98a34c7f4243f	k__Bacteria; p__Proteobacteria; c__Gammaproteobacteria; o__Legionellales; f__Legionellaceae; g__Legionella; s__
4f0a0024273dc718e667ed03f5234ea4	k__Bacteria; p__Proteobacteria; c__Alphaproteobacteria; o__Rickettsiales; f__mitochondria
4f2702a22fd269ef74ae857bb7e33cfd	k__Bacteria; p__Proteobacteria; c__Betaproteobacteria; o__Neisseriales; f__Neisseriaceae; g__; s__
4f384da3c357a5d70cea3d5dd16a475e	k__Bacteria; p__Firmicutes; c__Bacilli; o__Bacillales; f__Paenibacillaceae; g__Paenibacillus; s__
4f51ed192abd748ba27c2d8596cc39d8	k__Bacteria; p__Proteobacteria; c__Gammaproteobacteria; o__Pseudomonadales; f__Moraxellaceae; g__Moraxella; s__
4f58edbb1e5f4719f134ce4214397038	k__Bacteria; p__Firmicutes; c__Clostridia; o__Clostridiales; f__Ruminococcaceae; g__; s__
4f5c9e71a23b467c7fce493a595af370	k__Bacteria; p__Firmicutes; c__Bacilli; o__Lactobacillales; f__Lactobacillaceae; g__Lactobacillus; s__zeae
4f5efd25dacb5d639316e7291ff6ff8b	k__Bacteria; p__Proteobacteria; c__Betaproteobacteria; o__Neisseriales; f__Neisseriaceae; g__Neisseria
4f750095f15348cf207bc58974cf9318	k__Bacteria; p__Tenericutes; c__Mollicutes; o__RF39; f__; g__; s__
4f83652447f094be8884e9554254293c	k__Bacteria; p__Firmicutes; c__Clostridia; o__Clostridiales; f__Peptococcaceae; g__rc4-4; s__
4f911658da97a744b781ec611078e8b0	k__Bacteria; p__Actinobacteria; c__Actinobacteria; o__Actinomycetales; f__Dietziaceae; g__Dietzia; s__
4fa5c9835c1c637d20ec720f550c1d7e	k__Bacteria; p__Firmicutes; c__Erysipelotrichi; o__Erysipelotrichales; f__Erysipelotrichaceae; g__; s__
4fba6fef450158c1bd1cbcb5a0e8f5e5	k__Bacteria; p__Bacteroidetes; c__Bacteroidia; o__Bacteroidales; f__Prevotellaceae; g__Prevotella; s__copri
4ff1996ebdcf13a0e74da5d155967c52	k__Bacteria; p__Firmicutes; c__Clostridia; o__Clostridiales; f__Veillonellaceae; g__Sporomusa; s__
5007320201ac26bf1c469e7b7443f7f7	k__Bacteria; p__Acidobacteria; c__Acidobacteriia; o__Acidobacteriales; f__Acidobacteriaceae; g__Edaphobacter
5019ec681228ed2fe27a69b9eeb4e312	k__Bacteria; p__Proteobacteria; c__Gammaproteobacteria; o__Pseudomonadales; f__Pseudomonadaceae; g__Pseudomonas; s__fragi
501a3e687c65822914e1a727e5f43331	k__Bacteria; p__Firmicutes; c__Clostridia; o__Clostridiales; f__Ruminococcaceae; g__Ruminococcus; s__
50313555c1a4385e25c85b06a5c8ad42	k__Bacteria; p__Firmicutes; c__Clostridia; o__Clostridiales; f__Lachnospiraceae; g__Dorea; s__
5032278790dcc2501b6c14b22ea074ea	k__Bacteria; p__Firmicutes; c__Clostridia; o__Clostridiales; f__Ruminococcaceae; g__; s__
505659cb078bb05bedfe0d94cccf3efa	k__Bacteria; p__Firmicutes; c__Clostridia; o__Clostridiales
506efac48dc5d5be2c0122c381639a3f	k__Bacteria; p__Bacteroidetes; c__Bacteroidia; o__Bacteroidales; f__Rikenellaceae; g__; s__
508cbdfafe56223afad3a3c526487465	k__Bacteria; p__Proteobacteria; c__Deltaproteobacteria; o__Myxococcales; f__Cystobacterineae; g__; s__
5092d89ef33c7cd7aa1e741286647f0e	k__Bacteria; p__Proteobacteria; c__Gammaproteobacteria; o__Legionellales; f__Coxiellaceae; g__; s__
5098a8a81b82bfacd22d0d9a339fd245	k__Bacteria; p__Bacteroidetes; c__Bacteroidia; o__Bacteroidales; f__Porphyromonadaceae; g__Parabacteroides; s__
509907e2b118c905a079b71dc5f04034	k__Bacteria; p__Firmicutes; c__Clostridia; o__Clostridiales; f__Ruminococcaceae; g__Ruminococcus; s__
50b0705daad0fc84b480e840aa6b2c58	k__Bacteria; p__Firmicutes; c__Clostridia; o__Clostridiales; f__Peptostreptococcaceae; g__Peptostreptococcus; s__
50c77a7d7927650d7b1a093e9d2c62de	k__Bacteria; p__Firmicutes; c__Clostridia; o__Clostridiales; f__; g__; s__
50e540732a789efb85954f6ee9dfc756	k__Bacteria; p__Firmicutes; c__Bacilli; o__Bacillales; f__Paenibacillaceae; g__Cohnella; s__
50ed67c6c21f5e4f38c9b9266a21d891	k__Bacteria; p__Firmicutes; c__Clostridia; o__Clostridiales; f__; g__; s__
50f9e024d63d39ee5f467834b2c3ab48	k__Bacteria; p__Proteobacteria; c__Gammaproteobacteria; o__Legionellales; f__Legionellaceae; g__Legionella; s__
50fb93dad525b440dc193bc631872eba	k__Bacteria; p__Actinobacteria; c__Actinobacteria; o__Actinomycetales; f__Nocardioidaceae; g__Nocardioides
50fd18de3dfc61c6a9b5ed2c8d9d5497	k__Bacteria; p__Firmicutes; c__Clostridia; o__Clostridiales; f__; g__; s__
510b0dd1a11cfa8f5ad1dc361552c45c	k__Bacteria; p__Proteobacteria; c__Alphaproteobacteria; o__Sphingomonadales; f__Sphingomonadaceae; g__Sphingomonas; s__wittichii
510be0183e98f96750f0427a119f3701	k__Bacteria; p__Fusobacteria; c__Fusobacteriia; o__Fusobacteriales; f__Fusobacteriaceae; g__Fusobacterium; s__
51111e66d97d8fd3f0bdf584d69c7835	k__Bacteria; p__Firmicutes; c__Clostridia; o__Clostridiales; f__Lachnospiraceae; g__[Ruminococcus]; s__gnavus
511f1159ac0ce0c62086f2262b78fc13	k__Bacteria; p__Bacteroidetes; c__Bacteroidia; o__Bacteroidales; f__Prevotellaceae; g__Prevotella; s__melaninogenica
51203fa7b69c57b7a7f81f69418b6404	k__Bacteria; p__Firmicutes; c__Clostridia; o__Clostridiales; f__[Tissierellaceae]; g__Anaerococcus; s__
51344ada608df5868fe563cb61895ece	k__Bacteria; p__Verrucomicrobia; c__Verrucomicrobiae; o__Verrucomicrobiales; f__Verrucomicrobiaceae; g__Akkermansia; s__muciniphila
5145a64195595c4e263d459d8faeca6f	k__Bacteria; p__Firmicutes; c__Clostridia; o__Clostridiales; f__Lachnospiraceae; g__Lachnoanaerobaculum; s__orale
5149bdbf03de13bb38557d48d5141b87	k__Bacteria; p__Firmicutes; c__Clostridia; o__Clostridiales; f__Lachnospiraceae; g__[Ruminococcus]; s__gnavus
518d84f3337dfd635e76a5407b2d5acb	k__Bacteria; p__Actinobacteria; c__Actinobacteria; o__Bifidobacteriales; f__Bifidobacteriaceae; g__Bifidobacterium; s__animalis
51a6c9f6f5b827d320c0f7d18d109cb8	k__Bacteria; p__Firmicutes; c__Clostridia; o__Clostridiales
51d4f17b8dda9f7d972bf3dd0ecc4e59	k__Bacteria; p__Bacteroidetes; c__Bacteroidia; o__Bacteroidales; f__Rikenellaceae; g__; s__
51e1f0a50e25f4d915985af95fef4fdd	k__Bacteria; p__Proteobacteria; c__Gammaproteobacteria; o__Pseudomonadales; f__Pseudomonadaceae; g__Pseudomonas
51f001b27cb12a2e784ea230ed5ad03c	k__Bacteria; p__Firmicutes; c__Bacilli; o__Bacillales; f__Thermoactinomycetaceae; g__Shimazuella; s__
51f321368c153d4b76b4916905d291b5	k__Bacteria; p__Firmicutes; c__Bacilli; o__Bacillales
52117da335db1a87da8fa5a3adf7a452	k__Bacteria; p__Proteobacteria; c__Betaproteobacteria; o__Burkholderiales; f__Comamonadaceae; g__Tepidimonas; s__
5224c8677f31bb2d5eb133e3db1f4785	k__Bacteria; p__Firmicutes; c__Clostridia; o__Clostridiales; f__Ruminococcaceae; g__Oscillospira; s__
5241430c9a720952ce8d8a6a24a24973	k__Bacteria; p__Firmicutes; c__Clostridia; o__Clostridiales; f__; g__; s__
525d027b7e21f60ddd1537854b79419c	k__Bacteria; p__Firmicutes; c__Clostridia; o__Clostridiales; f__Ruminococcaceae; g__Ruminococcus; s__
5261afeb0bd9da159d021ea10ab9cf34	k__Bacteria; p__Tenericutes; c__Mollicutes; o__RF39; f__; g__; s__
526657e2cf1383a6fca1229a2bd6f944	k__Bacteria; p__Cyanobacteria; c__Chloroplast; o__Streptophyta; f__; g__; s__
527796fd89116a356801992378fd60c1	k__Bacteria; p__Bacteroidetes; c__Bacteroidia; o__Bacteroidales; f__Prevotellaceae; g__Prevotella; s__
5284495840f983847ec0d0b741a9a471	k__Bacteria; p__Firmicutes; c__Clostridia; o__Clostridiales
52897a04650b6ea2f55859a544d11cc3	k__Bacteria; p__Firmicutes; c__Bacilli; o__Bacillales; f__Paenibacillaceae; g__; s__
528b28a0b0ed12e5b3455da14ec0823e	k__Bacteria; p__Chloroflexi; c__Thermomicrobia; o__JG30-KF-CM45; f__; g__; s__
5294c0e2c5ab571842b07c413291a71e	k__Bacteria; p__Bacteroidetes; c__Cytophagia; o__Cytophagales; f__Cytophagaceae; g__Spirosoma; s__
5295a2780284e189aa19c5c6c7d8127f	k__Bacteria
5297b0a7822379179828a651a6c3b679	k__Bacteria; p__Firmicutes; c__Clostridia; o__Clostridiales; f__Veillonellaceae; g__Veillonella; s__dispar
52a08a11ec5dc87b1a048b5042461f29	k__Bacteria; p__Proteobacteria; c__Gammaproteobacteria; o__Pseudomonadales; f__Pseudomonadaceae; g__Pseudomonas
52ca86ec48d4b050235dcfdea9cd5d39	k__Bacteria; p__Firmicutes; c__Clostridia; o__Clostridiales; f__Ruminococcaceae; g__; s__
52d20efbde84f2954661d004e05cec10	k__Bacteria; p__Firmicutes; c__Bacilli; o__Bacillales; f__Alicyclobacillaceae; g__Alicyclobacillus; s__macrosporangiidus
52e2fcecf4a5cd5305abebe45c1d0335	k__Bacteria; p__Firmicutes; c__Clostridia; o__Clostridiales
52f09b8f2f319d29a9cd7f72e352d73e	k__Bacteria; p__Firmicutes; c__Clostridia; o__Clostridiales; f__Lachnospiraceae; g__; s__
5313cb1706d7522f35aee5d61cf54031	k__Bacteria; p__Tenericutes; c__Mollicutes; o__RF39; f__; g__; s__
531afed86de1bc22b3e766120be6e50a	k__Bacteria; p__Bacteroidetes; c__Bacteroidia; o__Bacteroidales; f__Prevotellaceae; g__Prevotella; s__
5331f57ab0f2e416cce5e856ca82bc07	k__Bacteria; p__Firmicutes; c__Clostridia; o__Clostridiales; f__Lachnospiraceae; g__Coprococcus; s__
5336416963efa034899c44e1ec8f309e	k__Bacteria; p__Bacteroidetes; c__Bacteroidia; o__Bacteroidales; f__[Paraprevotellaceae]; g__[Prevotella]; s__
533d12102a68064994d75cd26a0fe0e8	k__Bacteria; p__Firmicutes; c__Clostridia; o__Clostridiales; f__Ruminococcaceae; g__Oscillospira; s__
534ae1292f8ab63bdd6f97344ef4656d	k__Bacteria; p__Proteobacteria; c__Alphaproteobacteria; o__Rhizobiales; f__Bradyrhizobiaceae; g__Bosea; s__genosp.
53761697abba60250cb2968e537a70c6	k__Bacteria; p__Actinobacteria; c__Actinobacteria; o__Actinomycetales; f__Corynebacteriaceae; g__Corynebacterium; s__
53766143c1dbfeab6a709e72f8fabe30	k__Bacteria; p__Actinobacteria; c__Actinobacteria; o__Actinomycetales; f__Corynebacteriaceae; g__Corynebacterium; s__
537eda6a89138b6b6d2213ffc718c852	k__Bacteria; p__Firmicutes; c__Clostridia; o__Clostridiales; f__Lachnospiraceae; g__; s__
5383f7906b522df1076bd24cf05b23ef	k__Bacteria; p__Proteobacteria; c__Alphaproteobacteria; o__Sphingomonadales; f__Sphingomonadaceae; g__Sphingomonas; s__wittichii
538add871396bc31fee52b4c6e73542a	k__Bacteria; p__Firmicutes; c__Clostridia; o__Clostridiales; f__Lachnospiraceae
53903158801eb4b694d25e3427a7f6fd	k__Bacteria; p__Actinobacteria; c__Actinobacteria; o__Actinomycetales; f__Nocardiopsaceae
53c41f816d58c418986046034953b03e	k__Bacteria; p__Actinobacteria; c__Actinobacteria; o__Actinomycetales; f__Actinomycetaceae; g__Actinomyces; s__
53eaf84a691ddb63db304d72717702ca	k__Bacteria; p__Proteobacteria; c__Gammaproteobacteria; o__Xanthomonadales; f__Xanthomonadaceae; g__Stenotrophomonas; s__maltophilia
5425f9eda71afbc71638d011c18e96ae	k__Bacteria; p__Firmicutes; c__Clostridia; o__Clostridiales; f__Ruminococcaceae; g__Oscillospira; s__
5438e75153393c2dda98fe3d99c26da1	k__Bacteria; p__Actinobacteria; c__Actinobacteria; o__Actinomycetales; f__Microbacteriaceae
5443a3f15cad4117ecbc72bfd4de8f25	k__Bacteria; p__Firmicutes; c__Clostridia; o__Clostridiales; f__Ruminococcaceae; g__; s__
5457ba3fa5b87e3213cfa99392340a8c	k__Bacteria; p__Firmicutes; c__Clostridia; o__Clostridiales; f__Veillonellaceae; g__Veillonella
545a33c92cc3f67d4deb61886e1abb6c	k__Bacteria; p__Proteobacteria; c__Betaproteobacteria; o__Burkholderiales; f__Burkholderiaceae; g__Burkholderia; s__bryophila
54636cc62ba1639ccbde9db081b6a077	k__Bacteria; p__Firmicutes; c__Bacilli; o__Bacillales; f__Paenibacillaceae; g__; s__
548a5df654d3fac3cf0847def7a0f804	k__Bacteria; p__Firmicutes; c__Clostridia; o__Clostridiales; f__Veillonellaceae; g__Veillonella
54b868ffca3feae9e7aac1c2973ff957	k__Bacteria; p__Firmicutes; c__Clostridia; o__Clostridiales; f__Lachnospiraceae; g__Dorea; s__
54c82e78a5d6403950532c990e12e94e	k__Bacteria; p__Proteobacteria; c__Gammaproteobacteria; o__Xanthomonadales; f__Sinobacteraceae; g__Steroidobacter; s__
54cb7238e63ab56a413d8c0a2120fcd5	k__Bacteria; p__Firmicutes; c__Clostridia; o__Clostridiales; f__Peptococcaceae; g__Desulfosporosinus; s__meridiei
54d1335855e7992d91a502f62cdd30cb	k__Bacteria; p__Firmicutes; c__Bacilli; o__Bacillales; f__Paenibacillaceae; g__; s__
54dcb911e3ab04e9d5b30c3912100b41	k__Bacteria; p__Firmicutes; c__Clostridia; o__Clostridiales; f__; g__; s__
54e0174aa8565daf971f0e40d489b6c0	k__Bacteria; p__Firmicutes; c__Clostridia; o__Clostridiales
54ed36214f639910ed7e688795e721a9	k__Bacteria; p__Proteobacteria; c__Alphaproteobacteria; o__Sphingomonadales; f__Sphingomonadaceae; g__Sphingomonas; s__asaccharolytica
54f22499d942745c1992ae3ff42230ff	k__Bacteria; p__Firmicutes; c__Clostridia; o__Clostridiales; f__Ruminococcaceae; g__; s__
5542a932713066e3248a8f5eb89eb1d0	k__Bacteria; p__Firmicutes; c__Bacilli; o__Lactobacillales; f__Carnobacteriaceae
5572c0d696290741113b76c9d1aca4f3	k__Bacteria; p__Firmicutes; c__Clostridia; o__Clostridiales; f__Lachnospiraceae; g__Roseburia; s__inulinivorans
55801c34f6dc817dba1f5fed5b3dc281	k__Bacteria; p__Actinobacteria; c__Actinobacteria; o__Actinomycetales; f__Corynebacteriaceae; g__Corynebacterium; s__
5581b7260ac9458026b995dd1df8fbd0	k__Bacteria; p__Deferribacteres; c__Deferribacteres; o__Deferribacterales; f__Deferribacteraceae; g__Mucispirillum; s__schaedleri
55832edbf3a0021f37899c29a7b10fda	k__Bacteria; p__Firmicutes; c__Clostridia; o__Clostridiales; f__Lachnospiraceae; g__Epulopiscium; s__
558b748631bdf6b5b5efb2a866585fc9	k__Bacteria; p__Bacteroidetes; c__Bacteroidia; o__Bacteroidales; f__Bacteroidaceae; g__Bacteroides
55916f03f8cd8196b967caed2fd9932d	k__Bacteria; p__Firmicutes; c__Clostridia; o__Clostridiales; f__Ruminococcaceae; g__Ruminococcus; s__
55953807fb8bdef709e62f48b0dbb0e6	k__Bacteria; p__Firmicutes; c__Clostridia; o__Clostridiales; f__Lachnospiraceae; g__; s__
559b39af6ac7ae12313c09267c6c6c6e	k__Bacteria; p__Firmicutes; c__Bacilli; o__Bacillales; f__Staphylococcaceae; g__Jeotgalicoccus; s__
55b9b308d0991e56f484f5c2c5fcd076	k__Bacteria; p__Actinobacteria; c__Actinobacteria; o__Actinomycetales; f__Corynebacteriaceae; g__Corynebacterium; s__
55cd6e30835bd5e49141cd7c7bc87aeb	k__Bacteria; p__Spirochaetes; c__Spirochaetes; o__Spirochaetales; f__Spirochaetaceae; g__Treponema; s__
55e13f8dab549862e69a31ea7da96e09	k__Bacteria; p__Firmicutes; c__Erysipelotrichi; o__Erysipelotrichales; f__Erysipelotrichaceae; g__Allobaculum; s__
55e568074f3bbdfd79634aa15b97601b	k__Bacteria; p__Firmicutes; c__Clostridia; o__Clostridiales; f__Clostridiaceae; g__Clostridium; s__
55e62a37d75f2f867ef4733f85b82a45	k__Bacteria; p__Firmicutes; c__Clostridia; o__Clostridiales; f__Ruminococcaceae
55ecb87ab968562969d4af08e5f9b5aa	k__Bacteria; p__Firmicutes; c__Clostridia; o__Clostridiales; f__; g__; s__
55f2658f7b605509d87faed6518dd8f7	k__Bacteria; p__Firmicutes; c__Clostridia; o__Clostridiales; f__; g__; s__
5602d10a6d065f26324435e9c0ba15dc	k__Bacteria; p__Proteobacteria; c__Alphaproteobacteria; o__Rhizobiales; f__Hyphomicrobiaceae; g__Devosia; s__
560ac8612f23ff3ea523f39543d79d04	k__Bacteria; p__Firmicutes; c__Clostridia; o__Clostridiales; f__Veillonellaceae; g__Sporomusa; s__
560d972e183830a57fa05d00dd3f08bb	k__Bacteria; p__Tenericutes; c__Mollicutes; o__RF39; f__; g__; s__
562f951972ceb56e78ac65f60f135446	k__Bacteria; p__Firmicutes; c__Clostridia; o__Clostridiales; f__Ruminococcaceae; g__Oscillospira; s__
5648dccee530d68ceb3e4d7d22cf8756	k__Bacteria; p__Proteobacteria; c__Gammaproteobacteria; o__Pseudomonadales; f__Pseudomonadaceae; g__Pseudomonas
565b576fb860f9b28e81346373c72f5f	k__Bacteria; p__Bacteroidetes; c__Bacteroidia; o__Bacteroidales; f__Prevotellaceae; g__Prevotella; s__
5669f9055e393154386d3ad1196d3f03	k__Bacteria; p__Bacteroidetes; c__Bacteroidia; o__Bacteroidales; f__Rikenellaceae; g__; s__
566e0022eb4f65298883ce9017cca3e7	k__Bacteria; p__Firmicutes; c__Clostridia; o__Clostridiales; f__Clostridiaceae
567217d700d7d4b548fa8b7f50927b73	k__Bacteria; p__Firmicutes; c__Bacilli; o__Bacillales; f__Paenibacillaceae; g__Paenibacillus
5673ae66819e3bdbbc09461e4959159e	k__Bacteria; p__Proteobacteria; c__Gammaproteobacteria; o__Enterobacteriales; f__Enterobacteriaceae
569653b1659271a290facfcedd0de061	k__Bacteria; p__Firmicutes; c__Bacilli; o__Lactobacillales; f__Enterococcaceae; g__Enterococcus
5697414a50fb9f841bc5469d3b996d99	k__Bacteria; p__Actinobacteria; c__Actinobacteria; o__Actinomycetales; f__Micrococcaceae; g__Nesterenkonia; s__
56b2d1e810eecf303b32dfc9bc103f0b	k__Bacteria; p__Firmicutes; c__Clostridia; o__Clostridiales; f__; g__; s__
56e77a0c32e46eae1447964d470dd65c	k__Bacteria; p__Firmicutes; c__Clostridia; o__OPB54; f__; g__; s__
572a691111a757a01d32ee5a1164c2da	k__Bacteria; p__Actinobacteria; c__Actinobacteria; o__Actinomycetales; f__Actinomycetaceae; g__Actinomyces; s__
5737713ddeb82213146739bed14add97	k__Bacteria; p__Actinobacteria; c__Actinobacteria; o__Actinomycetales; f__Actinomycetaceae; g__Actinomyces; s__
57577cf99bd9f7532b2be933489c8255	k__Bacteria; p__Firmicutes; c__Bacilli; o__Bacillales; f__Paenibacillaceae; g__; s__
5792694714bebfa1d551f16c86d65c7f	k__Bacteria; p__Firmicutes; c__Clostridia; o__Clostridiales; f__Ruminococcaceae; g__Ruminococcus; s__
57a2b7f3845e9dc1a8bf96b2539bde57	k__Bacteria; p__Firmicutes; c__Clostridia; o__Clostridiales; f__Ruminococcaceae
57b6be2eedec4a11efc58171ac4dd328	k__Bacteria; p__Bacteroidetes; c__Bacteroidia; o__Bacteroidales; f__Prevotellaceae; g__Prevotella; s__
57c2dccb6adba677d7c6bfe138d887fd	k__Bacteria; p__Proteobacteria; c__Alphaproteobacteria; o__Sphingomonadales; f__Sphingomonadaceae; g__Sphingomonas; s__
57cf354cd6a36c8a43b0f341e6e5ba1f	k__Bacteria; p__Proteobacteria; c__Alphaproteobacteria; o__Rhodobacterales; f__Rhodobacteraceae; g__Rhodobacter; s__
57e11c3559fa2ef79a2702684229e4ba	k__Bacteria; p__Firmicutes; c__Clostridia; o__Clostridiales; f__; g__; s__
57e417ca80e1dbb91b840f2747b98031	k__Bacteria; p__Tenericutes; c__Mollicutes; o__RF39; f__; g__; s__
5810a546133ce2a9e01ba21225a87263	k__Bacteria; p__Firmicutes; c__Clostridia; o__Clostridiales; f__; g__; s__
581a55014641e1cd55cdc272c0365a28	k__Bacteria; p__Firmicutes; c__Bacilli; o__Lactobacillales; f__Lactobacillaceae; g__Lactobacillus; s__
5835e803489a8db46d36cc4b9afdbb69	k__Bacteria; p__Actinobacteria; c__Actinobacteria; o__Actinomycetales; f__Actinomycetaceae; g__Actinomyces; s__
583faa9ad0f51d40184166626fba9b49	k__Bacteria; p__Firmicutes; c__Clostridia; o__Clostridiales; f__Veillonellaceae; g__Veillonella; s__dispar
584fa2e94300264b46d32f068835d238	k__Bacteria; p__Firmicutes; c__Clostridia; o__Clostridiales; f__Lachnospiraceae; g__; s__
5866f36c147eda6128acd7c355617e82	k__Bacteria; p__Firmicutes; c__Clostridia; o__Clostridiales; f__Ruminococcaceae; g__Gemmiger; s__formicilis
586b3b1acecfdf1cdf5853b65f01000f	k__Bacteria; p__Actinobacteria; c__Actinobacteria; o__Actinomycetales; f__Streptosporangiaceae; g__; s__
586f2a23736b00b0d8636f61c4c85910	k__Bacteria; p__Firmicutes; c__Clostridia; o__Clostridiales; f__Peptostreptococcaceae; g__Tepidibacter; s__
588e50622670a60a6262593bf29b1dc9	k__Bacteria; p__Proteobacteria; c__Gammaproteobacteria; o__Enterobacteriales; f__Enterobacteriaceae
5897a7ed13f61e345f6cf16fbcc6accd	k__Bacteria; p__Firmicutes; c__Bacilli; o__Bacillales; f__Paenibacillaceae; g__Paenibacillus; s__
58d18a5992ebd252955e1283b77cb8d6	k__Bacteria; p__Actinobacteria; c__Actinobacteria; o__Actinomycetales; f__Brevibacteriaceae; g__Brevibacterium; s__
58d48f7fae77eb29ab6dc15fd07b5dfc	k__Bacteria; p__Lentisphaerae; c__[Lentisphaeria]; o__Victivallales; f__Victivallaceae; g__; s__
59107e6dda7fb70f99b0e0b2a3bd8bcc	k__Bacteria; p__Proteobacteria; c__Alphaproteobacteria; o__Rhizobiales; f__Rhizobiaceae; g__Agrobacterium; s__
59165db4a4072a47bb958217f2e98c82	k__Bacteria; p__Bacteroidetes; c__Bacteroidia; o__Bacteroidales; f__Prevotellaceae; g__Prevotella; s__pallens
591e0bc14cb4e16f197d218b3021a5d2	k__Bacteria; p__Firmicutes; c__Clostridia; o__Clostridiales; f__; g__; s__
591f1dc7d15687015d73092afe0b4f65	k__Bacteria; p__Firmicutes; c__Clostridia; o__Clostridiales; f__Lachnospiraceae
592c8cbc4c5dd1edb35ccf5aa1c58f1d	k__Bacteria; p__Proteobacteria; c__Alphaproteobacteria; o__Rickettsiales; f__mitochondria
594061ed4e2ea378773c474cd4803c29	k__Bacteria; p__Actinobacteria; c__Actinobacteria; o__Actinomycetales; f__Promicromonosporaceae; g__Promicromonospora; s__
5964634ce4a3112d9aed18f613d2c3bd	k__Bacteria; p__Proteobacteria; c__Alphaproteobacteria; o__Rhizobiales; f__Methylobacteriaceae; g__; s__
596db8ce20ae5cbfdc338a62f1bed1d9	k__Bacteria; p__Firmicutes; c__Clostridia; o__Clostridiales; f__Ruminococcaceae; g__Ruminococcus; s__
59777186ad2e0947e97615b5d6225136	k__Bacteria; p__Firmicutes; c__Clostridia; o__Clostridiales; f__Ruminococcaceae; g__Faecalibacterium; s__prausnitzii
5977fa9b27e21ce3de77670a15998d03	k__Bacteria; p__Firmicutes; c__Bacilli; o__Lactobacillales; f__Lactobacillaceae; g__Lactobacillus
59945f8e59bd3a6232505cafefcfefc7	k__Bacteria; p__Firmicutes; c__Clostridia; o__Clostridiales
5999c79b4a0c61c19a9cf4cc497f1514	k__Bacteria; p__Firmicutes; c__Clostridia; o__Clostridiales
59b5b768dd7fda3a0b95c940d8044dba	k__Bacteria; p__Firmicutes; c__Bacilli; o__Bacillales; f__Paenibacillaceae; g__Brevibacillus; s__
59c9aa6b03f452ebb82c9a4289383f0e	k__Bacteria; p__Fusobacteria; c__Fusobacteriia; o__Fusobacteriales; f__Fusobacteriaceae; g__Fusobacterium; s__
59e154bb767e030d5bb084429909dc38	k__Bacteria; p__Firmicutes; c__Clostridia; o__Clostridiales; f__Ruminococcaceae; g__Ruminococcus; s__
59e1ce44d9ecf2eeef0e53e644694326	k__Bacteria; p__Firmicutes; c__Clostridia; o__Clostridiales; f__[Mogibacteriaceae]; g__; s__
59e7289380be2a5909212804646e6eb6	k__Bacteria; p__Firmicutes; c__Bacilli; o__Bacillales; f__Bacillaceae; g__Bacillus; s__clausii
59eb9c9adff337768fa14692d944939f	k__Bacteria; p__Proteobacteria; c__Alphaproteobacteria; o__Rhizobiales; f__Methylocystaceae; g__; s__
59f7d8a7f37d6eeec95eb556f33da267	k__Bacteria; p__Proteobacteria; c__Gammaproteobacteria; o__Pasteurellales; f__Pasteurellaceae; g__Actinobacillus; s__parahaemolyticus
5a0624e1039aedd29b193839d7d5050e	k__Bacteria; p__Firmicutes; c__Clostridia; o__Clostridiales; f__; g__; s__
5a0ae6a10829f1b6d01debcce81fa0c6	k__Bacteria; p__Proteobacteria; c__Alphaproteobacteria; o__Rhizobiales; f__; g__; s__
5a1160e34768ff78a364927dd43387dd	k__Bacteria; p__Firmicutes; c__Clostridia; o__Clostridiales; f__Ruminococcaceae; g__Ruminococcus; s__
5a177282b9578e7fc281a2864c12db02	k__Bacteria; p__Bacteroidetes; c__Bacteroidia; o__Bacteroidales; f__Prevotellaceae; g__Prevotella; s__
5a2347a8c4672a7c42be0cff84e6587d	k__Bacteria; p__Proteobacteria; c__Betaproteobacteria; o__Neisseriales; f__Neisseriaceae; g__Neisseria
5a2676b27aa16876cffaca5a4dca4669	k__Bacteria; p__Actinobacteria; c__Actinobacteria; o__Actinomycetales; f__Actinomycetaceae; g__Actinomyces; s__
5a2a502ab2a0e6a700cf08672338f677	k__Bacteria; p__Firmicutes; c__Clostridia; o__Clostridiales; f__Ruminococcaceae
5a4219f80ab3a85649d362cef02def06	k__Bacteria; p__Firmicutes; c__Bacilli; o__Lactobacillales; f__Lactobacillaceae; g__Lactobacillus; s__zeae
5a483930ae687501d239547148452dec	k__Bacteria; p__Firmicutes; c__Clostridia; o__Clostridiales; f__Lachnospiraceae
5a5dc75a7fe8a314a2510fa53aba2bee	k__Bacteria; p__Firmicutes; c__Clostridia; o__Clostridiales; f__; g__; s__
5a6c87d6a4eb5e114959f6192f29b641	k__Bacteria; p__Actinobacteria; c__Actinobacteria; o__Bifidobacteriales; f__Bifidobacteriaceae; g__Bifidobacterium; s__adolescentis
5a729c0967cd42acc74793f37eb3caa1	k__Bacteria; p__Actinobacteria; c__Actinobacteria; o__Actinomycetales; f__Geodermatophilaceae; g__Blastococcus; s__saxobsidens
5a84cbca09090824be95118781802f82	k__Bacteria; p__Firmicutes; c__Clostridia; o__Clostridiales; f__Ruminococcaceae; g__Oscillospira; s__
5a85851196cf28506943318a2b3d5114	k__Bacteria; p__Firmicutes; c__Bacilli; o__Bacillales; f__Bacillaceae
5a8ec9c84f3495870c2a71f1dbb17a26	k__Bacteria; p__Firmicutes; c__Clostridia; o__Clostridiales; f__Lachnospiraceae
5a90ada059bd4710cb11ff1dc8789599	k__Bacteria; p__Firmicutes; c__Bacilli; o__Bacillales; f__Paenibacillaceae; g__Paenibacillus; s__
5a9c54c81e9585d71bbc67acaf137141	k__Bacteria; p__Firmicutes; c__Clostridia; o__Clostridiales; f__[Tissierellaceae]; g__Sedimentibacter; s__
5aa4b697915ea1825b26471756fcbc17	k__Bacteria; p__Firmicutes; c__Bacilli; o__Bacillales; f__Thermoactinomycetaceae
5aa57c23f76b939b80b6c105891d6cec	k__Bacteria; p__Firmicutes; c__Erysipelotrichi; o__Erysipelotrichales; f__Erysipelotrichaceae; g__; s__
5b1924f6a706bec9f569c094edf8918f	k__Bacteria; p__Actinobacteria; c__Coriobacteriia; o__Coriobacteriales; f__Coriobacteriaceae; g__Enterococcus; s__casseliflavus
5b1a6290eee14897c3dd7f11a09f93cd	k__Bacteria; p__Tenericutes; c__Mollicutes; o__RF39; f__; g__; s__
5b1ed6365be310b4c54936109b91eda3	k__Bacteria; p__Firmicutes; c__Clostridia; o__Clostridiales; f__Lachnospiraceae; g__; s__
5b21b634343b33d4de467b62da7ebbf0	k__Bacteria; p__Proteobacteria; c__Alphaproteobacteria; o__Rhizobiales; f__Brucellaceae; g__Ochrobactrum
5b2b550acd7f81b3ec4d1e9732c3a3c1	k__Bacteria; p__Firmicutes; c__Clostridia; o__Clostridiales; f__Ruminococcaceae; g__Ruminococcus; s__
5b36e29baabcaba75a809c3f95d34066	k__Bacteria; p__Firmicutes; c__Clostridia; o__Clostridiales; f__Dehalobacteriaceae; g__Dehalobacterium; s__
5b3dca4b64097c8c2f257b1a8382ecf5	k__Bacteria; p__Firmicutes; c__Bacilli; o__Lactobacillales; f__Streptococcaceae; g__; s__
5b46813ae467fe2eaee1c05ccd233c8e	k__Bacteria; p__Firmicutes; c__Clostridia; o__Clostridiales; f__; g__; s__
5b60a6f141254601a1116642c3a7d7ca	k__Bacteria; p__Firmicutes; c__Clostridia; o__Clostridiales; f__Lachnospiraceae; g__Dorea; s__
5b85ed89ad968ad8e66de48c18cd22c7	k__Bacteria; p__Firmicutes; c__Clostridia; o__Clostridiales; f__Lachnospiraceae; g__Coprococcus; s__
5b96e4bcf2e6745457ffbc1a653deca5	k__Bacteria; p__Actinobacteria; c__Actinobacteria; o__Actinomycetales; f__Cellulomonadaceae; g__Cellulomonas; s__
5ba9fc8b7c4a592304735cc16114c75e	k__Bacteria; p__Proteobacteria; c__Gammaproteobacteria; o__Enterobacteriales; f__Enterobacteriaceae
5bb2c16ddab6aa65e577d73de6292939	k__Bacteria; p__Firmicutes; c__Clostridia; o__Clostridiales; f__Peptostreptococcaceae; g__; s__
5bbff234316a113e507a63bfb6e299e1	k__Bacteria; p__Firmicutes; c__Bacilli; o__Lactobacillales; f__Streptococcaceae; g__Streptococcus; s__
5bdc099119a8cc5ee2c471209aac49e6	k__Bacteria; p__Firmicutes; c__Clostridia; o__Clostridiales; f__; g__; s__
5be31cfb3ad61e104009ab6fb46f6d7b	k__Bacteria; p__Bacteroidetes; c__Bacteroidia; o__Bacteroidales; f__S24-7; g__; s__
5be85eb33fdbec6f55538b7a9c322819	k__Bacteria
5c06be3aecefb78c5fe4571ed258ecea	k__Bacteria; p__Firmicutes; c__Bacilli; o__Bacillales
5c09d7232cb9dcda299e7c9079cfeba1	k__Bacteria; p__Tenericutes; c__Mollicutes; o__RF39; f__; g__; s__
5c192c8a78360cea75a7b805cef39e85	k__Bacteria; p__[Thermi]; c__Deinococci; o__Thermales; f__Thermaceae; g__Thermus; s__
5c249add19d59f47d7ae7714755942cf	k__Bacteria; p__Bacteroidetes; c__Bacteroidia; o__Bacteroidales; f__Prevotellaceae; g__Prevotella; s__copri
5c4563e3dd7e12dcdf279783af929eaa	k__Bacteria; p__Firmicutes; c__Clostridia; o__Clostridiales; f__Lachnospiraceae; g__Roseburia; s__faecis
5c5c16a3b081c2b479b08bb03bffd456	k__Bacteria; p__Firmicutes; c__Clostridia; o__Clostridiales; f__Lachnospiraceae; g__; s__
5c6a299ae08ad072c60133e5aabea170	k__Bacteria; p__Firmicutes; c__Bacilli; o__Bacillales; f__Paenibacillaceae; g__Paenibacillus; s__
5c6dad0d0bab23a642fc11c677486c78	k__Bacteria; p__Proteobacteria; c__Alphaproteobacteria; o__Rhizobiales; f__Phyllobacteriaceae; g__Phyllobacterium; s__
5c8ab304c9598e43323adcc4607c798a	k__Bacteria; p__Actinobacteria; c__Coriobacteriia; o__Coriobacteriales; f__Coriobacteriaceae; g__Atopobium; s__rimae
5c9a2850054526ba63d6da19c24b96a7	k__Bacteria; p__Chloroflexi; c__Thermomicrobia; o__JG30-KF-CM45; f__; g__; s__
5c9dbe36d5c807b2f6b4c78cf1d05c9d	k__Bacteria; p__Firmicutes; c__Bacilli; o__Bacillales; f__Paenibacillaceae; g__Paenibacillus
5cb072fc0e9c88a1ae7a654aad573b37	k__Bacteria; p__Firmicutes; c__Clostridia; o__Clostridiales; f__; g__; s__
5cb6c7c6ee078c25f3885258f34a1290	k__Bacteria; p__Firmicutes; c__Clostridia; o__Clostridiales; f__Veillonellaceae; g__Veillonella; s__
5cd026d9ee01eb0371798b7c5ee8b364	k__Bacteria; p__Firmicutes; c__Clostridia; o__Clostridiales; f__Lachnospiraceae; g__Lachnoanaerobaculum; s__orale
5cdef913913e1913b2b59545ce8a9635	k__Bacteria; p__Firmicutes; c__Clostridia; o__Clostridiales; f__Ruminococcaceae; g__Oscillospira; s__
5ce3719789110f3b337b489cc1e352bc	k__Bacteria; p__Bacteroidetes; c__Bacteroidia; o__Bacteroidales; f__Prevotellaceae; g__Prevotella; s__pallens
5ce371b78899714d2348f18865e70fe5	k__Bacteria; p__Firmicutes; c__Bacilli; o__Lactobacillales; f__Lactobacillaceae; g__Lactobacillus; s__helveticus
5cfeeddfb4b8dfb0d09917e3bb3e0cac	k__Bacteria; p__Proteobacteria; c__Betaproteobacteria; o__Burkholderiales; f__Alcaligenaceae; g__Achromobacter; s__
5d007e822a9fe95a6c059825d8219379	k__Bacteria; p__Firmicutes; c__Clostridia; o__Clostridiales; f__; g__; s__
5d01d303184a02f64aa7e9537256a469	k__Bacteria; p__Firmicutes; c__Clostridia; o__Clostridiales; f__Lachnospiraceae; g__; s__
5d08d1eb4b8a0672652dd0fc0af2dcf0	k__Bacteria; p__Firmicutes; c__Clostridia; o__Clostridiales; f__Ruminococcaceae; g__Oscillospira; s__
5d1551676dace013c13bd50bbac5c462	k__Bacteria; p__Actinobacteria; c__Actinobacteria; o__Actinomycetales; f__Pseudonocardiaceae; g__Saccharopolyspora; s__
5d2356d8798c11abda797ab361d25f33	k__Bacteria; p__Firmicutes; c__Bacilli; o__Lactobacillales; f__Lactobacillaceae; g__Lactobacillus
5d33503e5f63cbf4412e557b34eb6020	k__Bacteria; p__Cyanobacteria; c__Chloroplast; o__Streptophyta; f__; g__; s__
5d4f685480f6dd1babbd2bfb8fedcf15	k__Bacteria; p__Firmicutes; c__Clostridia; o__Clostridiales; f__Veillonellaceae; g__Sporomusa; s__
5d6d200a9ac1ce63fef95fdd57cd4039	k__Bacteria; p__Firmicutes; c__Clostridia; o__Clostridiales; f__Lachnospiraceae
5d6e85aafa35f2984c4202d0ce8067de	k__Bacteria; p__Firmicutes; c__Clostridia; o__Clostridiales; f__Ruminococcaceae; g__Faecalibacterium; s__prausnitzii
5d7452662dd5b95636bb94743577a629	k__Bacteria; p__Bacteroidetes; c__Flavobacteriia; o__Flavobacteriales; f__[Weeksellaceae]; g__Chryseobacterium; s__
5dcf0b75ca974467170dd7739ec289eb	k__Bacteria; p__Bacteroidetes; c__Flavobacteriia; o__Flavobacteriales; f__[Weeksellaceae]; g__; s__
5dd47143a0690fbad7610d35a21aa0f7	k__Bacteria; p__Firmicutes; c__Clostridia; o__Clostridiales; f__Clostridiaceae; g__Clostridium; s__intestinale
5df5f02fc78854ec1f9097cb0d964995	k__Bacteria; p__Tenericutes; c__Mollicutes; o__RF39; f__; g__; s__
5df79d0f666ed5d671ed393e62274784	k__Bacteria; p__Firmicutes; c__Clostridia; o__Clostridiales; f__Ruminococcaceae
5e0ba474de1b721e3e60a2ee92fbe1c9	k__Bacteria; p__Firmicutes; c__Clostridia; o__Clostridiales; f__Lachnospiraceae; g__; s__
5e18094f37d33836726fabc09f8e46fc	k__Bacteria; p__Firmicutes; c__Clostridia; o__Clostridiales; f__; g__; s__
5e2373a6b445fd2b21e06a66c13e931c	k__Bacteria; p__Firmicutes; c__Clostridia; o__Clostridiales; f__Lachnospiraceae
5e431ba38e41c1241f663636fdfa1008	k__Bacteria; p__Firmicutes; c__Clostridia; o__Clostridiales; f__Lachnospiraceae; g__Oribacterium; s__
5e4af7f2b33f5e8ebb983a232f980fa3	k__Bacteria; p__Firmicutes; c__Bacilli; o__Lactobacillales; f__Carnobacteriaceae
5e4ece8c5cafb70eb9d2402b08f6adc7	k__Bacteria; p__Actinobacteria; c__Actinobacteria; o__Actinomycetales; f__Actinomycetaceae; g__Arcanobacterium; s__
5e50a007ea9a7f83275157c158916fcc	k__Bacteria; p__Bacteroidetes; c__Bacteroidia; o__Bacteroidales; f__Rikenellaceae; g__; s__
5e5268e20950cf0e5e8e7f13dd1a72f2	k__Bacteria; p__Firmicutes; c__Clostridia; o__Clostridiales; f__Lachnospiraceae; g__Moryella; s__
5e72ba94b3cf6dc49f8de1e2f73355b9	k__Bacteria; p__Firmicutes; c__Bacilli; o__Bacillales; f__Paenibacillaceae; g__Brevibacillus
5e7df8b52727d297ad374a5120d8bb8b	k__Bacteria; p__Firmicutes; c__Clostridia; o__Clostridiales; f__Peptostreptococcaceae; g__; s__
5eaae9030bfbd5676bfbbb29ff738616	k__Bacteria; p__Firmicutes; c__Clostridia; o__Clostridiales; f__Lachnospiraceae; g__; s__
5eaeab6fa2a8efe96eac7a0712c65080	k__Bacteria; p__Firmicutes; c__Clostridia; o__Clostridiales; f__; g__; s__
5ecf536a6b5c36282076c2fab403d649	k__Bacteria; p__Proteobacteria; c__Alphaproteobacteria; o__Rhizobiales; f__Methylocystaceae; g__Pleomorphomonas; s__oryzae
5ed4c6a0fa8c17b304b109b81e55fb00	k__Bacteria; p__Firmicutes; c__Bacilli; o__Lactobacillales; f__Aerococcaceae; g__Aerococcus; s__
5edf1dab26e38bdb18505d7c8e4e51f0	k__Bacteria; p__Firmicutes; c__Bacilli; o__Bacillales; f__Thermoactinomycetaceae
5eeba282d7986c47d11ec620e6d0ef79	k__Bacteria; p__Actinobacteria; c__Actinobacteria; o__Actinomycetales; f__Streptosporangiaceae
5ef7cd747f38712a1f8dcabaf73f56d0	k__Bacteria; p__Firmicutes; c__Clostridia; o__Clostridiales; f__Lachnospiraceae; g__Lachnoanaerobaculum; s__orale
5f06ebe3cb2fe9ec63673f535f7dedfd	k__Bacteria; p__Proteobacteria; c__Alphaproteobacteria; o__Rhizobiales; f__Hyphomicrobiaceae; g__Rhodoplanes; s__
5f09e0e726ecafb8d3d90d9237c33017	k__Bacteria; p__Firmicutes; c__Clostridia; o__Clostridiales; f__Lachnospiraceae; g__Roseburia; s__
5f1f51d1992c777d9903d1a40710862d	k__Bacteria; p__Firmicutes; c__Clostridia; o__Clostridiales; f__; g__; s__
5f1f6453ad88dc836876671d27f97f58	k__Bacteria; p__Firmicutes; c__Clostridia; o__Clostridiales; f__; g__; s__
5f1fe18861e98fe25b152a65f93e775b	k__Bacteria; p__Firmicutes; c__Clostridia; o__Clostridiales; f__Ruminococcaceae; g__Oscillospira; s__
5f21ebe1ba0ad593b37f1bbdf1ced5c3	k__Bacteria; p__Firmicutes; c__Clostridia; o__Clostridiales; f__Lachnospiraceae; g__Clostridium; s__fimetarium
5f25904e073fe5c114cadfde74349518	k__Bacteria; p__Firmicutes; c__Clostridia; o__Clostridiales; f__Lachnospiraceae; g__; s__
5f2b30a10f3acde2dde59a2628a26e3e	k__Bacteria; p__Firmicutes; c__Erysipelotrichi; o__Erysipelotrichales; f__Erysipelotrichaceae; g__; s__
5f495a8c701d9298cc8b8fd20ac8f9f9	k__Bacteria; p__Firmicutes; c__Bacilli; o__Lactobacillales; f__Aerococcaceae; g__Aerococcus; s__
5f52cfbaaa24156ce4890b1e49443f86	k__Bacteria; p__Firmicutes; c__Clostridia; o__Clostridiales; f__Ruminococcaceae; g__Oscillospira; s__
5f6397a465515a3b1c9e5767355a8be2	k__Bacteria; p__Firmicutes; c__Bacilli; o__Bacillales; f__Paenibacillaceae; g__Paenibacillus; s__
5f8d35126b0a7321413d21487ec72b73	k__Bacteria; p__Firmicutes; c__Erysipelotrichi; o__Erysipelotrichales; f__Erysipelotrichaceae; g__[Eubacterium]; s__dolichum
5f95df1f8c13d432d57bcc0ed625e8e6	k__Bacteria; p__Firmicutes; c__Clostridia; o__Clostridiales
5fa38d906934b48b6cad4ea45a4d6c74	k__Bacteria; p__Bacteroidetes; c__Bacteroidia; o__Bacteroidales; f__Prevotellaceae; g__Prevotella; s__
5fb3658d68494d03451383a7fa3b230b	k__Bacteria; p__Proteobacteria; c__Alphaproteobacteria; o__Rhizobiales; f__Rhizobiaceae; g__Kaistia; s__
5fb4a4a60c0e5880199e85f23ae2aa41	k__Bacteria; p__Firmicutes; c__Clostridia; o__Clostridiales; f__Eubacteriaceae; g__Anaerofustis; s__
5fbf02642aa67178b84d734d4f155d88	k__Bacteria; p__Tenericutes; c__Mollicutes; o__RF39; f__; g__; s__
5fe7368c69e66529f0fe71354cc10fc7	k__Bacteria; p__Firmicutes; c__Clostridia; o__Clostridiales; f__Lachnospiraceae; g__[Ruminococcus]; s__gnavus
6005b413405b0894d69a5061722d1a79	k__Bacteria; p__Firmicutes; c__Clostridia; o__Clostridiales; f__Ruminococcaceae; g__Ruminococcus; s__bromii
601101d33cdf43a40bd674a50711af52	k__Bacteria; p__Firmicutes; c__Clostridia; o__Clostridiales; f__Lachnospiraceae; g__Roseburia; s__
601d212382d03436ffe5a577a567d039	k__Bacteria; p__Firmicutes; c__Clostridia; o__Clostridiales; f__Lachnospiraceae; g__Lachnoanaerobaculum; s__orale
60205dbbd6801568907a564c33a1f285	k__Bacteria; p__Firmicutes; c__Clostridia; o__Clostridiales; f__Lachnospiraceae; g__; s__
6053429fcb19593cdaffa1c2ecab8084	k__Bacteria; p__Fusobacteria; c__Fusobacteriia; o__Fusobacteriales; f__Leptotrichiaceae; g__Leptotrichia; s__
605ac9a7e88d47be1bf40c55de175d79	k__Bacteria; p__Proteobacteria; c__Alphaproteobacteria; o__Rhizobiales; f__Methylobacteriaceae; g__; s__
6060025eeccb5345d8fb61e51fbc5388	k__Bacteria; p__Proteobacteria; c__Alphaproteobacteria; o__Rhizobiales; f__Rhizobiaceae; g__Rhizobium; s__
6073ae9f1fed40ef8e5ead551223cf91	k__Bacteria; p__Tenericutes; c__Mollicutes; o__RF39; f__; g__; s__
6080467d07308f27aae63f92cb8a809b	k__Bacteria; p__Bacteroidetes; c__Bacteroidia; o__Bacteroidales; f__Prevotellaceae; g__Prevotella; s__
60a2e0a4d6760de56ad66a42a4093dc5	k__Bacteria; p__Firmicutes; c__Clostridia; o__Clostridiales; f__Lachnospiraceae; g__[Ruminococcus]; s__gnavus
60bfc726328afd1c291c7a62f84e885f	k__Bacteria; p__Firmicutes; c__Clostridia; o__Clostridiales; f__Lachnospiraceae; g__[Ruminococcus]; s__gnavus
60c1f29d66e66f7ad014d4c414ec30fa	k__Bacteria; p__Firmicutes; c__Erysipelotrichi; o__Erysipelotrichales; f__Erysipelotrichaceae; g__Bulleidia; s__moorei
60caa1b58e3ab96b8116510f650e6fb8	k__Bacteria; p__Actinobacteria; c__Actinobacteria; o__Actinomycetales; f__Corynebacteriaceae; g__Corynebacterium; s__
60e08ec178c51710444f9c440997848e	k__Bacteria; p__Firmicutes; c__Clostridia; o__Clostridiales; f__; g__; s__
60e2082e76eb9f12b843cf80d7dda8e4	k__Bacteria; p__Firmicutes; c__Clostridia; o__Clostridiales; f__Ruminococcaceae; g__Ruminococcus; s__
60eca0f59b35f0541a289d6aab9d85a2	k__Bacteria; p__Firmicutes; c__Clostridia; o__Clostridiales; f__Ruminococcaceae; g__Butyricicoccus; s__pullicaecorum
60f93fed83d17d00026301844c347826	k__Bacteria; p__Firmicutes; c__Clostridia; o__Clostridiales; f__Ruminococcaceae; g__; s__
6116fd7dc95407952dfa6a8cad835556	k__Bacteria; p__Firmicutes; c__Erysipelotrichi; o__Erysipelotrichales; f__Erysipelotrichaceae; g__Coprobacillus; s__
6120ea095815cfb33ab4f2127a5b8583	k__Bacteria; p__Firmicutes; c__Bacilli; o__Bacillales; f__Thermoactinomycetaceae; g__Thermoactinomyces; s__
61249d572bfcb7205b780608cb53cbf6	k__Bacteria; p__Firmicutes; c__Clostridia; o__Clostridiales; f__Lachnospiraceae; g__Blautia
61471d90c2adb4e8e6fee7eecdd9ca8d	k__Bacteria; p__Firmicutes; c__Clostridia; o__Clostridiales; f__Lachnospiraceae; g__; s__
61535a40adb8221483821e3984d0b1ac	k__Bacteria; p__Firmicutes; c__Clostridia; o__Clostridiales; f__Lachnospiraceae
616f45da8bb6ea6ef5a5148e0b4e720d	k__Bacteria; p__Firmicutes; c__Clostridia; o__Clostridiales; f__; g__; s__
61ae5d2b9fa6378e5793baf461f3c35b	k__Bacteria; p__Firmicutes; c__Clostridia; o__Clostridiales; f__; g__; s__
61db0bd527e07336202fd0ff4578c042	k__Bacteria; p__Firmicutes; c__Clostridia; o__Clostridiales; f__Lachnospiraceae; g__; s__
61e3ca66d7c4624f272f81c4f9179c85	k__Bacteria; p__Firmicutes; c__Clostridia; o__Clostridiales; f__; g__; s__
61f558a5342e88beb50002be2a1e1ab3	k__Bacteria; p__Fusobacteria; c__Fusobacteriia; o__Fusobacteriales; f__Leptotrichiaceae; g__Leptotrichia; s__
620a51190f7e2c832749a3568114b4c1	k__Bacteria; p__Firmicutes; c__Clostridia; o__Clostridiales
62153f87f56bf30f326b9a9b6d9b8efc	k__Bacteria; p__Firmicutes; c__Erysipelotrichi; o__Erysipelotrichales; f__Erysipelotrichaceae; g__; s__
621c47eba23ae9c542cbea58e92ff9b2	k__Bacteria; p__Firmicutes; c__Clostridia; o__Clostridiales; f__Ruminococcaceae; g__Ruminococcus; s__
62248c5c1fe408fa86792ec46ad9bd3b	k__Bacteria; p__Firmicutes; c__Clostridia; o__Clostridiales; f__Ruminococcaceae; g__; s__
62669fe8cbcac323242a062e3c6a3386	k__Bacteria; p__Firmicutes; c__Clostridia; o__Clostridiales; f__Lachnospiraceae; g__; s__
626c3cb429dfcb8bb140f9595d36deda	k__Bacteria; p__Firmicutes; c__Clostridia; o__Clostridiales; f__[Mogibacteriaceae]; g__Mogibacterium; s__
627ee92713560565d81c6225986afcc8	k__Bacteria; p__Proteobacteria; c__Betaproteobacteria; o__Neisseriales; f__Neisseriaceae; g__; s__
62a58b033feb1aaea8913ffb9a6aba14	k__Bacteria; p__Firmicutes; c__Clostridia; o__Clostridiales; f__Lachnospiraceae
62ba97a0250411dcdfbf01b8d34f0503	k__Bacteria; p__Bacteroidetes; c__Bacteroidia; o__Bacteroidales; f__Prevotellaceae; g__Prevotella; s__melaninogenica
62bb28e43e0d54bb9523a28fcb49f927	k__Bacteria; p__Proteobacteria; c__Betaproteobacteria; o__Burkholderiales; f__Burkholderiaceae; g__Burkholderia
62c0e1da19a53edab31c13380c76e84a	k__Bacteria; p__Firmicutes; c__Bacilli; o__Bacillales; f__Staphylococcaceae; g__Staphylococcus; s__sciuri
62c1fdb483e675c401535ccdf5642d05	k__Bacteria; p__Bacteroidetes; c__Bacteroidia; o__Bacteroidales; f__Prevotellaceae; g__Prevotella; s__
62c2f66badcd30ecd1419315a3e59c7f	k__Bacteria; p__Bacteroidetes; c__Bacteroidia; o__Bacteroidales; f__[Paraprevotellaceae]; g__[Prevotella]; s__
62c67b48981e47f5d093331a4078d012	k__Bacteria; p__Firmicutes; c__Clostridia; o__Clostridiales; f__Ruminococcaceae; g__Anaerotruncus; s__
62dc76a09326c359be5946507e82e9fa	k__Bacteria; p__Firmicutes; c__Clostridia; o__Clostridiales; f__[Mogibacteriaceae]; g__; s__
62deccdf8799de021aedf3b417123c74	k__Bacteria; p__Firmicutes; c__Clostridia; o__Clostridiales; f__Ruminococcaceae; g__Butyricicoccus; s__pullicaecorum
6304ce3c0a7d96147ca10478832d39ac	k__Bacteria; p__Bacteroidetes; c__Bacteroidia; o__Bacteroidales; f__Porphyromonadaceae; g__Porphyromonas; s__
6326f3883ecfa02452ebaa3af9c5d84c	k__Bacteria; p__Firmicutes; c__Clostridia; o__Clostridiales; f__Lachnospiraceae; g__Clostridium; s__aldenense
6334a90d7939c4dc261db3169815a804	k__Bacteria; p__Actinobacteria; c__Actinobacteria; o__Actinomycetales; f__Corynebacteriaceae; g__Corynebacterium; s__
6337b308d49ea78bc68f9100ca6c62b4	k__Bacteria; p__Firmicutes; c__Clostridia; o__Clostridiales; f__; g__; s__
633e72c6c09cdbfb4f70812963ec383c	k__Bacteria; p__Proteobacteria; c__Gammaproteobacteria; o__Pseudomonadales; f__Pseudomonadaceae; g__Pseudomonas
6351776080c78bda7056051b884b55f7	k__Bacteria; p__Firmicutes; c__Bacilli; o__Lactobacillales; f__Lactobacillaceae; g__Lactobacillus; s__zeae
635270b2a3acbffd2a4af87281d9029d	k__Bacteria; p__Actinobacteria; c__Coriobacteriia; o__Coriobacteriales; f__Coriobacteriaceae; g__Adlercreutzia; s__
635c68ad720b827e5eef63c1e5da345f	k__Bacteria; p__Firmicutes; c__Clostridia; o__Clostridiales; f__; g__; s__
6375299ff2573649ee978b1ff90b86ab	k__Bacteria; p__Firmicutes; c__Clostridia; o__Clostridiales; f__Lachnospiraceae
637b9b3f4d1cbb1a10c07817619cdf69	k__Bacteria; p__Proteobacteria; c__Gammaproteobacteria; o__Pseudomonadales; f__Pseudomonadaceae; g__Pseudomonas; s__veronii
638be01c1a7bdf99563510fea3aded9e	k__Bacteria; p__Firmicutes; c__Clostridia; o__Clostridiales; f__Lachnospiraceae; g__Lachnoanaerobaculum; s__orale
63aa88f9615dd7f2c96a63e3a4d07e7a	k__Bacteria; p__Fusobacteria; c__Fusobacteriia; o__Fusobacteriales; f__Leptotrichiaceae; g__Leptotrichia; s__
63d30f2cff3f97e236301cedc4f95f1c	k__Bacteria; p__Firmicutes; c__Clostridia; o__Clostridiales; f__Veillonellaceae; g__Sporomusa; s__
63e0d239b2d3b780aff6eccd397b7bf9	k__Bacteria; p__Firmicutes; c__Clostridia; o__Clostridiales; f__Lachnospiraceae; g__; s__
63f319f5e7451e41ea6917f80d97804d	k__Bacteria; p__Firmicutes; c__Clostridia; o__Clostridiales; f__Lachnospiraceae
63f69caf156daca222b31e32b820fa25	k__Bacteria; p__Firmicutes; c__Clostridia; o__Clostridiales
63ffd2d3df19a057cfb458068dc42ed3	k__Bacteria; p__Firmicutes; c__Bacilli; o__Lactobacillales; f__Lactobacillaceae; g__Lactobacillus; s__acidipiscis
64047158420a8a9df9d35d8719329c5b	k__Bacteria; p__Bacteroidetes; c__Bacteroidia; o__Bacteroidales; f__[Barnesiellaceae]; g__; s__
6411658f57255435c651084fd12d0c6d	k__Bacteria; p__Proteobacteria; c__Gammaproteobacteria; o__Enterobacteriales; f__Enterobacteriaceae; g__Sodalis; s__
64125f5e3ec0083d578c92a7155ff476	k__Bacteria; p__Fusobacteria; c__Fusobacteriia; o__Fusobacteriales; f__Fusobacteriaceae; g__Fusobacterium; s__
6418445af6ab6f8fc3f35290013366fe	k__Bacteria; p__Firmicutes; c__Bacilli; o__Bacillales; f__Bacillaceae; g__Oceanobacillus; s__oncorhynchi
641c20e43f750d964f04b7de0615b9ab	k__Bacteria; p__Proteobacteria; c__Gammaproteobacteria; o__Enterobacteriales; f__Enterobacteriaceae; g__Shigella
641db7752ae911612cf89c32d6089b4e	k__Bacteria; p__Firmicutes; c__Clostridia; o__Clostridiales; f__Lachnospiraceae; g__Coprococcus; s__
641e9477910c38cf51e100b54c1548b1	k__Bacteria; p__Firmicutes; c__Clostridia; o__Clostridiales; f__; g__; s__
6420671c26eef32065e0275c8cd6701e	k__Bacteria; p__Firmicutes; c__Clostridia; o__Clostridiales; f__Peptostreptococcaceae
643d40fe8a51901d0635f5db126819da	k__Bacteria; p__Firmicutes; c__Clostridia; o__Clostridiales; f__; g__; s__
643dfba6e827dfd6833bf1241f0c7ea0	k__Bacteria; p__Proteobacteria; c__Gammaproteobacteria; o__Enterobacteriales; f__Enterobacteriaceae; g__Sodalis; s__
64565027b9cf410e6899a61d296d2604	k__Bacteria; p__Firmicutes; c__Clostridia; o__Clostridiales; f__Lachnospiraceae; g__Coprococcus; s__
645b3e4976d9946b844f320d5c426da1	k__Bacteria; p__Actinobacteria; c__Actinobacteria; o__Actinomycetales; f__Micrococcaceae; g__Rothia; s__mucilaginosa
645cf2364b081b2068844966494a180a	k__Bacteria; p__Firmicutes; c__Clostridia; o__Clostridiales; f__Lachnospiraceae; g__Catonella; s__
64638ea8024feab7f5bebda641ce285e	k__Bacteria; p__Cyanobacteria; c__4C0d-2; o__YS2; f__; g__; s__
64718c75f780c92c1cd1025a35c21ded	k__Bacteria; p__Proteobacteria; c__Alphaproteobacteria; o__Rhizobiales; f__Phyllobacteriaceae; g__Phyllobacterium; s__
6472eb8b1e09f892aca2f23182962903	k__Bacteria; p__Proteobacteria; c__Alphaproteobacteria; o__Rhizobiales; f__Bradyrhizobiaceae
6485c71a4a1563a2a89e7af94c77653a	k__Bacteria; p__Proteobacteria; c__Gammaproteobacteria; o__Pasteurellales; f__Pasteurellaceae; g__Haemophilus; s__parainfluenzae
64887d477599cd3dfb5734b05544d746	k__Bacteria; p__Firmicutes; c__Clostridia; o__Clostridiales; f__Lachnospiraceae; g__Coprococcus; s__
6499f775759ee97ec90a0572cd043472	k__Bacteria; p__Firmicutes; c__Clostridia; o__Clostridiales; f__; g__; s__
649a8a7f2d1ff8fa3b25968d57bc9b9e	k__Bacteria; p__Firmicutes; c__Clostridia; o__Clostridiales; f__Lachnospiraceae; g__; s__
649f2efd13df2dff8125deb6f1a44f58	k__Bacteria; p__Proteobacteria; c__Gammaproteobacteria; o__Oceanospirillales; f__Halomonadaceae; g__Halomonas; s__
64a1fb3568ca733cc0a1c1bb083d525f	k__Bacteria; p__Actinobacteria; c__Coriobacteriia; o__Coriobacteriales; f__Coriobacteriaceae; g__Adlercreutzia; s__
64b1f6ddc8a595ca557e5e368ad68c49	k__Bacteria; p__Actinobacteria; c__Actinobacteria; o__Actinomycetales; f__Corynebacteriaceae; g__Corynebacterium; s__
64bda153dbbedc385aff99b3232bfcfd	k__Bacteria; p__Proteobacteria; c__Alphaproteobacteria; o__Sphingomonadales; f__Sphingomonadaceae; g__Novosphingobium; s__
64bdf63dcb878049e0d12155c8ed7af1	k__Bacteria; p__Firmicutes; c__Clostridia; o__Clostridiales; f__; g__; s__
64bef65789393f226bf7d5ca75346133	k__Bacteria; p__Proteobacteria; c__Alphaproteobacteria; o__Sphingomonadales; f__Sphingomonadaceae; g__Sphingomonas; s__wittichii
64c0631565683135b90bd037417fb657	k__Bacteria; p__Bacteroidetes; c__Bacteroidia; o__Bacteroidales; f__[Odoribacteraceae]; g__Odoribacter; s__
64c94902bc21d24dd60a2ceb739ea9b5	k__Bacteria; p__Bacteroidetes; c__Bacteroidia; o__Bacteroidales; f__Prevotellaceae; g__Prevotella; s__copri
64d1f91637a45d369ad019875001ce1c	k__Bacteria; p__Firmicutes; c__Clostridia; o__Clostridiales; f__[Tissierellaceae]; g__Anaerococcus; s__
64f3764c68f1c0996124be025870584d	k__Bacteria; p__Bacteroidetes; c__Bacteroidia; o__Bacteroidales; f__Bacteroidaceae; g__Bacteroides; s__
64f4f7f308af244946a0887ab3d8c062	k__Bacteria; p__Bacteroidetes; c__Cytophagia; o__Cytophagales; f__Cytophagaceae; g__Hymenobacter; s__
65048ef552e4e37234af72f532b2cf65	k__Bacteria; p__Firmicutes; c__Clostridia; o__Clostridiales; f__Peptococcaceae; g__Desulfosporosinus; s__meridiei
650a72407e452f95505b0c8abf14d029	k__Bacteria; p__Proteobacteria; c__Alphaproteobacteria; o__Rhizobiales; f__Rhizobiaceae; g__Rhizobium
652d707d2167fbe226464be7d7607938	k__Bacteria; p__Firmicutes; c__Clostridia; o__Clostridiales; f__Lachnospiraceae; g__; s__
65367568177bd708683f4984315205df	k__Bacteria; p__Firmicutes; c__Bacilli; o__Bacillales; f__Bacillaceae; g__Bacillus
6536a7bc84c95500ef05185628c9f407	k__Bacteria; p__Firmicutes; c__Clostridia; o__Clostridiales; f__Lachnospiraceae
65564efafb80060ef155c05105b8ed0b	k__Bacteria; p__Firmicutes; c__Clostridia; o__Clostridiales; f__; g__; s__
65638f9661e08a5599ba9400fcc2b768	k__Bacteria; p__Firmicutes; c__Bacilli; o__Bacillales; f__Paenibacillaceae; g__Brevibacillus; s__
65641452be75528754b5ae258ba661c1	k__Bacteria; p__Firmicutes; c__Bacilli; o__Lactobacillales; f__Aerococcaceae; g__Aerococcus; s__
65932ae425cbf7ce70622a0591b35804	k__Bacteria; p__Firmicutes; c__Clostridia; o__Clostridiales; f__Peptostreptococcaceae; g__; s__
6594cfafb0fdc1e0e6205aaec33b2c24	k__Bacteria; p__Proteobacteria; c__Gammaproteobacteria; o__Xanthomonadales; f__Xanthomonadaceae; g__Pseudoxanthomonas
65990c74559e4adfaa672a884ad7d464	k__Bacteria; p__Firmicutes; c__Clostridia; o__Clostridiales; f__Lachnospiraceae; g__Coprococcus; s__catus
65a7199bbbfdd68d3d03069eaebafb61	k__Bacteria; p__Proteobacteria; c__Alphaproteobacteria; o__Sphingomonadales; f__Sphingomonadaceae; g__Sphingobium; s__
65b43ef12cd01434a8f7c309eccd229b	k__Bacteria; p__Firmicutes; c__Clostridia; o__Clostridiales; f__Ruminococcaceae; g__Oscillospira; s__
65c84fbb3d11f2ec80780f7dda2a78dc	k__Bacteria; p__Firmicutes; c__Clostridia; o__Clostridiales; f__Ruminococcaceae; g__Clostridium
65d43491988bfe557da4d86a5ba25dae	k__Bacteria; p__Firmicutes; c__Bacilli; o__Bacillales; f__Staphylococcaceae; g__Staphylococcus
65e42c2d69bcf093aa2417e578bde9ec	k__Bacteria; p__Firmicutes; c__Clostridia; o__Clostridiales; f__Lachnospiraceae
65ec2c1db8a16e0a0b32a45261a604f0	k__Bacteria; p__Firmicutes; c__Bacilli; o__Bacillales; f__Bacillaceae; g__Bacillus; s__flexus
65f898937fc87c72a2440bce113e1b54	k__Bacteria; p__Firmicutes; c__Clostridia; o__Clostridiales; f__Ruminococcaceae; g__Clostridium; s__hungatei
66063c3a2e5cc0fd8b0b301cdbb7c0ce	k__Bacteria; p__Firmicutes; c__Clostridia; o__Clostridiales; f__; g__; s__
660b04fe8ac618efe9852a72cab64670	k__Bacteria; p__Firmicutes; c__Bacilli; o__Bacillales; f__Paenibacillaceae; g__Paenibacillus; s__
6616dc3bd6aeb3e26b9b2218290ea574	k__Bacteria; p__Bacteroidetes; c__Bacteroidia; o__Bacteroidales; f__Bacteroidaceae; g__Bacteroides; s__
661734f5e1261266c782ed091e3949dc	k__Bacteria; p__Firmicutes; c__Bacilli; o__Lactobacillales; f__Carnobacteriaceae
662befd96dbf1b0e238c7f90cf4bef24	k__Bacteria; p__Proteobacteria; c__Alphaproteobacteria; o__Rhizobiales; f__Phyllobacteriaceae; g__Phyllobacterium; s__
664d9bb1a4602b2c7b4683eb87d188e1	k__Bacteria; p__Actinobacteria; c__Actinobacteria; o__Actinomycetales; f__Sanguibacteraceae
6655d6fe7452fe2357aa64201a69cfbf	k__Bacteria; p__Actinobacteria; c__Actinobacteria; o__Actinomycetales; f__Corynebacteriaceae; g__Corynebacterium; s__
66760973c1f3796183b492a2413c9068	k__Bacteria; p__Proteobacteria; c__Gammaproteobacteria; o__Pseudomonadales; f__Moraxellaceae; g__Moraxella; s__
667d25fe1740ae3ef953cbaf2eb6b3b8	k__Bacteria; p__Firmicutes; c__Clostridia; o__Clostridiales; f__Ruminococcaceae; g__; s__
6699e41bfc358e876db5a64ac2f8c72d	k__Bacteria; p__Proteobacteria; c__Betaproteobacteria; o__Burkholderiales; f__Oxalobacteraceae; g__Ralstonia; s__
669d63df1129fb56f056ddadd8e3ffcf	k__Bacteria; p__Proteobacteria; c__Gammaproteobacteria; o__Enterobacteriales; f__Enterobacteriaceae
66a9101067d5d8c3ba7bb71b3043276d	k__Bacteria; p__Proteobacteria; c__Deltaproteobacteria; o__Desulfovibrionales; f__Desulfovibrionaceae; g__Desulfovibrio; s__
66a9ece5a3664b5fd81ad0244ed3b5d3	k__Bacteria; p__Bacteroidetes; c__Bacteroidia; o__Bacteroidales; f__Prevotellaceae; g__Prevotella; s__pallens
66cc76df03b4d87f3ab4d534bf3efac2	k__Bacteria; p__Proteobacteria; c__Alphaproteobacteria; o__Rhizobiales; f__Hyphomicrobiaceae; g__Devosia; s__
66e2dfb2c0c3d1b1cd5f5576d7aad9a1	k__Bacteria; p__Proteobacteria; c__Gammaproteobacteria; o__Aeromonadales; f__Aeromonadaceae; g__Aeromonas
66f946dceb71bdb9cc09b5a8e20a5577	k__Bacteria; p__Firmicutes; c__Clostridia; o__Clostridiales; f__; g__; s__
67004f3a15b8d70231f0fc06afa3f27e	k__Bacteria; p__Bacteroidetes; c__Bacteroidia; o__Bacteroidales; f__Prevotellaceae; g__Prevotella; s__
6706688be3a872e10980f9b870381edf	k__Bacteria; p__Firmicutes; c__Clostridia; o__Clostridiales; f__Veillonellaceae; g__Veillonella; s__dispar
670c1f48ada5de60bb2e379039bd219b	k__Bacteria; p__Firmicutes; c__Clostridia; o__Clostridiales; f__Veillonellaceae; g__Propionispora; s__
671f56cb9e843dbbacd5e8646ae48b4a	k__Bacteria; p__Actinobacteria; c__Coriobacteriia; o__Coriobacteriales; f__Coriobacteriaceae
6726d79ad040ab8cc921b1e5df42fc07	k__Archaea; p__Euryarchaeota; c__Methanomicrobia; o__Methanosarcinales; f__Methanosarcinaceae; g__Methanosarcina; s__
67460a29098fba6a481da7db81812289	k__Bacteria; p__Firmicutes; c__Clostridia; o__Clostridiales
674b528dfb2e9f7dab0675be5440a7b0	k__Bacteria; p__Proteobacteria; c__Gammaproteobacteria; o__Pseudomonadales; f__Moraxellaceae; g__Acinetobacter; s__lwoffii
675abca9feb04abfcbccf6aff1f14ce9	k__Bacteria; p__Bacteroidetes; c__Flavobacteriia; o__Flavobacteriales; f__Flavobacteriaceae; g__Capnocytophaga; s__ochracea
675c847bccbc53942ebb7b8cbb4efc4d	k__Bacteria; p__Bacteroidetes; c__Bacteroidia; o__Bacteroidales; f__Prevotellaceae; g__Prevotella; s__copri
676dbfe10aa3df47ad04905fcf53f294	k__Bacteria; p__Firmicutes; c__Clostridia; o__Clostridiales; f__; g__; s__
6783b50a3968c78af556fe40622005e7	k__Bacteria; p__Firmicutes; c__Clostridia; o__Clostridiales; f__Lachnospiraceae; g__Blautia; s__
6794dfe6aa278bcd61f3a21c16fd485a	k__Bacteria; p__Firmicutes; c__Clostridia; o__Clostridiales; f__Lachnospiraceae
679bb80eed77ca3bce68bdc7f9c0025c	k__Bacteria; p__Tenericutes; c__Mollicutes; o__RF39; f__; g__; s__
679cbf2f8ad4271e3ad5368a7b255e06	k__Bacteria; p__Firmicutes; c__Clostridia; o__Clostridiales; f__; g__; s__
67a5c29ddb5d1eeda2b8780bb4694235	k__Bacteria; p__Firmicutes; c__Clostridia; o__Clostridiales; f__Lachnospiraceae; g__Lachnoanaerobaculum; s__orale
67c4934e16f2290a941e0aa78d87569c	k__Bacteria; p__Bacteroidetes; c__Bacteroidia; o__Bacteroidales; f__Prevotellaceae; g__Prevotella; s__
67c532737f30ff0f53528486336ce6cb	k__Bacteria; p__Firmicutes; c__Clostridia; o__Clostridiales; f__; g__; s__
67e8859e108281ee7971084bfa759522	k__Bacteria; p__Firmicutes; c__Clostridia; o__Clostridiales; f__Lachnospiraceae; g__Clostridium; s__symbiosum
67f1a723ff484040ee7a5f54a4e03d2d	k__Bacteria; p__Firmicutes; c__Clostridia; o__Clostridiales; f__Lachnospiraceae
67f97093fb3cb25d92b5cc09736d9e26	k__Bacteria; p__Bacteroidetes; c__Bacteroidia; o__Bacteroidales; f__Prevotellaceae; g__Prevotella; s__melaninogenica
6807c9493781c19a20699578fd5da51c	k__Bacteria; p__Firmicutes; c__Clostridia; o__Clostridiales; f__Lachnospiraceae; g__; s__
68084402ba50c5318fb1062026beb58d	k__Bacteria; p__Proteobacteria; c__Betaproteobacteria; o__Burkholderiales; f__Burkholderiaceae; g__Burkholderia; s__bryophila
68252dd090f920d475b31fc0a5541c5c	k__Bacteria; p__Firmicutes; c__Clostridia; o__Clostridiales; f__; g__; s__
682dde043b6d08cf20021dc1e423446d	k__Bacteria; p__Firmicutes; c__Clostridia; o__Clostridiales; f__Lachnospiraceae; g__[Ruminococcus]; s__gnavus
6851a4ee264b56be2fff4686ce269907	k__Bacteria; p__Firmicutes; c__Clostridia; o__Clostridiales; f__Lachnospiraceae; g__Coprococcus; s__
6855320d5808e4cdf757b1d306d2937a	k__Bacteria; p__Firmicutes; c__Clostridia; o__Clostridiales; f__Lachnospiraceae; g__Blautia; s__
685a1812a6e46f72d7cf1f4a060b8e96	k__Bacteria; p__Actinobacteria; c__Actinobacteria; o__Actinomycetales; f__Corynebacteriaceae; g__Corynebacterium; s__
6862512a6ff02c5e6c60c5bfe5fed261	k__Bacteria; p__Proteobacteria; c__Alphaproteobacteria; o__Rhizobiales; f__Rhizobiaceae
686a0fff390534f2634bec1376c5d1e1	k__Bacteria; p__Tenericutes; c__Mollicutes; o__RF39; f__; g__; s__
6879ede4b69d427d73364ccba5faf49b	k__Bacteria; p__Firmicutes; c__Clostridia; o__Clostridiales; f__Lachnospiraceae; g__Blautia; s__
687d8be68c9424f69e6c5dcebba4777e	k__Bacteria; p__Actinobacteria; c__Actinobacteria; o__Actinomycetales; f__Streptomycetaceae; g__Streptomyces; s__
68836f719cf5fb80bb54d4b4048436ea	k__Bacteria; p__Bacteroidetes; c__Flavobacteriia; o__Flavobacteriales; f__[Weeksellaceae]; g__; s__
688d43650b8d7e270f5a8c0030f9f724	k__Bacteria; p__Actinobacteria; c__Actinobacteria; o__Actinomycetales; f__Thermomonosporaceae; g__Actinomadura
68a313a4c8c35a8f1fb6d4e6f2a39a7a	k__Bacteria; p__Firmicutes; c__Clostridia; o__Clostridiales; f__Lachnospiraceae
68a4172ac250da302aceb79b372b54df	k__Bacteria; p__Proteobacteria; c__Gammaproteobacteria; o__Pasteurellales; f__Pasteurellaceae; g__Haemophilus; s__influenzae
68b4d20fa7b2434a226535b373335fa5	k__Bacteria; p__Firmicutes; c__Clostridia; o__Clostridiales; f__Lachnospiraceae; g__; s__
68bcd8805e49c819041cec620e13805f	k__Bacteria
68ce896315d12ae27e8d290c3f358fa1	k__Bacteria; p__Firmicutes; c__Bacilli; o__Lactobacillales; f__Aerococcaceae; g__Abiotrophia; s__
68d40f74f8cb367796d758347e2d4b1f	k__Bacteria; p__Tenericutes; c__Mollicutes; o__RF39; f__; g__; s__
68d79c3035521e82b504b081a197d2ed	k__Bacteria; p__Firmicutes; c__Clostridia; o__Clostridiales; f__Ruminococcaceae; g__Oscillospira; s__
691771d80023bb9a4f419ae9bc8892cd	k__Bacteria; p__Firmicutes; c__Clostridia; o__Clostridiales; f__Lachnospiraceae; g__Coprococcus; s__
69179c4a6011d0c9d30036cf18626520	k__Bacteria; p__Proteobacteria; c__Gammaproteobacteria; o__Pseudomonadales; f__Moraxellaceae; g__Acinetobacter; s__
692b229b5d010353174d93050229125c	k__Bacteria; p__Actinobacteria; c__Actinobacteria; o__Actinomycetales; f__Nocardiopsaceae; g__; s__
693c980645f0af912893409ceee83c7e	k__Bacteria; p__Firmicutes; c__Clostridia; o__Clostridiales; f__Lachnospiraceae; g__; s__
695e683c61a15cad2702ea6ed0121d91	k__Bacteria; p__Firmicutes; c__Clostridia; o__Clostridiales
69730cfc064db72def1bdbd65f0cd35a	k__Bacteria; p__Actinobacteria; c__Actinobacteria; o__Actinomycetales; f__Nocardioidaceae; g__Actinopolymorpha; s__
69a11f927915e2a3ba1f7b9c84486527	k__Bacteria; p__Proteobacteria; c__Betaproteobacteria; o__Burkholderiales; f__Alcaligenaceae; g__Sutterella; s__
69b3da7ef7d08c527e97758eedb95556	k__Bacteria; p__Firmicutes; c__Clostridia; o__Clostridiales; f__Ruminococcaceae; g__; s__
69b90707f6f3da7941026fbe6a1597ce	k__Bacteria; p__Firmicutes; c__Clostridia; o__Clostridiales; f__Lachnospiraceae; g__; s__
69c8ce77a265fbb9a52596cd0c493f29	k__Bacteria; p__Firmicutes; c__Clostridia; o__Clostridiales; f__Veillonellaceae; g__Selenomonas; s__
6a14cf1425974b611cc80e32d847e92e	k__Bacteria; p__Cyanobacteria; c__Chloroplast; o__Streptophyta; f__; g__; s__
6a189ec89dbc8596de7ebe392f9e1c14	k__Bacteria; p__Firmicutes; c__Clostridia; o__Clostridiales; f__Lachnospiraceae; g__Dorea; s__
6a42f6b31b1958a4fd7c015ad7affbf4	k__Bacteria; p__Firmicutes; c__Bacilli; o__Bacillales; f__Paenibacillaceae; g__Paenibacillus; s__amylolyticus
6a488b59170dfe78137f884be500d984	k__Bacteria; p__Firmicutes; c__Clostridia; o__Clostridiales; f__Veillonellaceae; g__Sporomusa; s__
6a67fe13ef226a450b34f6233883e1fd	k__Bacteria; p__Firmicutes; c__Bacilli; o__Bacillales; f__Paenibacillaceae
6a6dcb179e0987c10966c84554757e41	k__Bacteria; p__Firmicutes; c__Clostridia; o__Clostridiales; f__; g__; s__
6a7cf01bfbe4c21f04b7b75efe91ed0d	k__Bacteria; p__Firmicutes; c__Clostridia; o__Clostridiales; f__Ruminococcaceae; g__; s__
6a80c4d47b44c692aeab74181c5fe012	k__Bacteria; p__Firmicutes; c__Clostridia; o__Clostridiales; f__Lachnospiraceae
6a8118b17d1d40cf877db24449ceb616	k__Bacteria; p__Firmicutes; c__Clostridia; o__Clostridiales; f__Ruminococcaceae; g__Oscillospira; s__
6a89256cace68b3713d0504147304be3	k__Bacteria; p__Firmicutes; c__Clostridia; o__Clostridiales; f__Ruminococcaceae; g__Faecalibacterium; s__prausnitzii
6aa6036d4a0019a62a6fab0faca0bc19	k__Bacteria; p__Proteobacteria; c__Alphaproteobacteria; o__Sphingomonadales; f__Sphingomonadaceae; g__Novosphingobium
6aaac37f56d07ffcea4fe9ef1cd00d2f	k__Bacteria; p__Firmicutes; c__Clostridia; o__Clostridiales; f__; g__; s__
6aabd25ef39ec078f08c393369615e1d	k__Bacteria; p__Actinobacteria; c__Actinobacteria; o__Actinomycetales; f__Nocardioidaceae
6ac07f71a9e85118874add27c7c4738f	k__Bacteria; p__Proteobacteria; c__Alphaproteobacteria; o__Rhizobiales; f__Aurantimonadaceae; g__; s__
6accab4d4b8e4da7d5a18541cbb99257	k__Bacteria; p__Firmicutes; c__Clostridia; o__Clostridiales
6ad69456e0f393760e24b35716c32a41	k__Bacteria; p__Firmicutes; c__Clostridia; o__Clostridiales; f__; g__; s__
6ae65c21686dca74b02e63664e118302	k__Bacteria; p__Firmicutes; c__Clostridia; o__Clostridiales; f__Lachnospiraceae; g__Blautia; s__
6af162ce3af7aa6dff89e5cdb134798f	k__Bacteria; p__Proteobacteria; c__Gammaproteobacteria; o__; f__; g__; s__
6af3aacf4e23f12e7c4a29a48f4d37a7	k__Bacteria; p__Firmicutes; c__Bacilli; o__Lactobacillales; f__Carnobacteriaceae
6b0dbacca301625d44c9f294a65f7c1a	k__Bacteria; p__Actinobacteria; c__Actinobacteria; o__Actinomycetales; f__Microbacteriaceae
6b497c512521208a9abce2ecd7fd43d2	k__Bacteria; p__Firmicutes; c__Clostridia; o__Clostridiales; f__Lachnospiraceae; g__; s__
6b58eab3efa3d8fc502c99815d19e932	k__Bacteria; p__Firmicutes; c__Clostridia; o__Clostridiales
6b6091eb2fb298d9b24a39ae6f59927b	k__Bacteria; p__Firmicutes; c__Clostridia; o__Clostridiales; f__Clostridiaceae; g__SMB53; s__
6b6374491c66b6caf3d07dbbccc973b1	k__Bacteria; p__Firmicutes; c__Clostridia; o__Clostridiales; f__Lachnospiraceae; g__[Ruminococcus]; s__gnavus
6b6632ffa787663b86dedd11af261e7a	k__Bacteria; p__Firmicutes; c__Clostridia; o__Clostridiales; f__; g__; s__
6b6d7fd145bfcc5558795c8dd6064f04	k__Bacteria; p__Firmicutes; c__Clostridia; o__Clostridiales; f__Lachnospiraceae; g__Coprococcus; s__
6b7534f0be51d1f52a0cb7daf1f64feb	k__Bacteria; p__Proteobacteria; c__Alphaproteobacteria; o__Sphingomonadales; f__Sphingomonadaceae; g__Sphingobium; s__yanoikuyae
6b8307a0222360f36caf7065c78ff424	k__Bacteria; p__Firmicutes; c__Clostridia; o__Clostridiales; f__; g__; s__
6b861b073aefd57927ceac668da9cc4c	k__Bacteria; p__Firmicutes; c__Clostridia; o__Clostridiales; f__; g__; s__
6b8ad6980941047fbd469608de31d55f	k__Bacteria; p__Firmicutes; c__Clostridia; o__Clostridiales; f__Ruminococcaceae; g__; s__
6ba43acb03ae795b3e7e31f2be946006	k__Bacteria; p__Firmicutes; c__Bacilli; o__Lactobacillales; f__Leuconostocaceae; g__Leuconostoc; s__mesenteroides
6bb7911773ed8588baac63054d686a34	k__Bacteria; p__Firmicutes; c__Clostridia; o__Clostridiales; f__Veillonellaceae; g__Selenomonas; s__
6bc4c77df179300155c05af0975334e9	k__Bacteria; p__Firmicutes; c__Clostridia; o__Clostridiales; f__; g__; s__
6bd5c91eff1cd17ade45c7f77feb4c4a	k__Bacteria; p__Proteobacteria; c__Deltaproteobacteria; o__MIZ46; f__; g__; s__
6be33c6d563967baefc004abf4b6bd4e	k__Bacteria; p__Firmicutes; c__Bacilli; o__Bacillales; f__Paenibacillaceae; g__Paenibacillus; s__barengoltzii
6be9159335eaf8fa99434fec1f32d847	k__Bacteria; p__Proteobacteria; c__Epsilonproteobacteria; o__Campylobacterales; f__Campylobacteraceae; g__Campylobacter; s__
6bfc8830c003c7b014f362158852665a	k__Bacteria; p__Proteobacteria; c__Deltaproteobacteria; o__Myxococcales; f__Cystobacterineae; g__; s__
6c0e8f04d9f29429ea2bb8b90c5c0bb3	k__Bacteria; p__Proteobacteria; c__Alphaproteobacteria; o__Rhodospirillales; f__; g__; s__
6c212259b14eac1ce1f8a258d374cbae	k__Bacteria; p__Firmicutes; c__Clostridia; o__Clostridiales; f__; g__; s__
6c33785c46c3fef68941d9addceaf948	k__Bacteria; p__Actinobacteria; c__Actinobacteria; o__Actinomycetales; f__Nocardioidaceae; g__Nocardioides; s__pyridinolyticus
6c492db510eab45a022fa88353969303	k__Bacteria; p__Bacteroidetes; c__Bacteroidia; o__Bacteroidales; f__[Paraprevotellaceae]; g__[Prevotella]; s__
6c5f4f9666d82b1bedf94e99acfe6741	k__Bacteria; p__Firmicutes; c__Bacilli; o__Bacillales
6c64ff19eca7fe5d47f1e2d5d1212201	k__Bacteria; p__Acidobacteria; c__Acidobacteriia; o__Acidobacteriales; f__Acidobacteriaceae; g__Terriglobus; s__
6c8f1f121dcbb2b03c3fd7a9bc906869	k__Bacteria; p__Firmicutes; c__Bacilli; o__Lactobacillales; f__Streptococcaceae; g__Streptococcus; s__
6c921e3ae0af506f54295d074ca071bc	k__Bacteria; p__Firmicutes; c__Clostridia; o__Clostridiales
6ca5825b481071a9e4a17d194b40d243	k__Bacteria; p__Proteobacteria; c__Alphaproteobacteria; o__Rhizobiales; f__Brucellaceae; g__Ochrobactrum; s__intermedium
6caad8a7630f14518b1e170e5d3f8aa6	k__Bacteria; p__Firmicutes; c__Clostridia; o__Clostridiales; f__; g__; s__
6cb10e591e82ca7999c9946bf5dd8d55	k__Bacteria; p__Actinobacteria; c__Actinobacteria; o__Actinomycetales; f__Corynebacteriaceae; g__Corynebacterium; s__
6cc15e13e573590b2e2ba003d3717c46	k__Bacteria; p__Firmicutes; c__Clostridia; o__Clostridiales; f__Ruminococcaceae; g__Ruminococcus; s__
6cc27202306e7cc89a1b38cd319910db	k__Bacteria; p__Firmicutes; c__Bacilli; o__Lactobacillales; f__Aerococcaceae; g__Aerococcus; s__
6cc3e54e4b38b35e60bd3e7fd8041f28	k__Bacteria; p__Proteobacteria; c__Deltaproteobacteria; o__Myxococcales; f__Cystobacterineae; g__; s__
6cce456364bbde43cbe45b84de90f34b	k__Bacteria; p__Firmicutes; c__Clostridia; o__Clostridiales; f__; g__; s__
6cd4b2290d7b8d5d272f0cb153ab00d6	k__Bacteria; p__Firmicutes; c__Clostridia; o__Clostridiales
6ce46878d55069e247c9968e063e625d	k__Bacteria; p__Cyanobacteria; c__Chloroplast; o__Streptophyta; f__; g__; s__
6cecf12e2e14bbf5aa9ba2583da1d479	k__Bacteria; p__Firmicutes; c__Clostridia; o__Clostridiales; f__Clostridiaceae; g__Thermoanaerobacterium; s__saccharolyticum
6d0a1c24750072f68059246abd89274e	k__Bacteria; p__Firmicutes; c__Clostridia; o__Clostridiales; f__; g__; s__
6d23ed3e2a3dc693ca451a10442563b5	k__Bacteria; p__Firmicutes; c__Clostridia; o__Clostridiales; f__Christensenellaceae; g__; s__
6d3ca861e9088a9980c912386a4308bb	k__Bacteria; p__Firmicutes; c__Clostridia; o__Clostridiales; f__Clostridiaceae; g__Thermoanaerobacterium; s__saccharolyticum
6d453410ee64f947ba9139aaa2b4c8dd	k__Bacteria; p__Firmicutes; c__Clostridia; o__Clostridiales; f__Lachnospiraceae; g__Dorea; s__
6d4ab2107d92228c6751838e7dbbe697	k__Bacteria; p__Firmicutes; c__Clostridia; o__Clostridiales; f__Lachnospiraceae; g__Coprococcus; s__
6d7c3591a60351934fa6070a0db83176	k__Bacteria; p__Actinobacteria; c__Actinobacteria; o__Actinomycetales
6d8b9e0ac0e756b85e34795abd80ee64	k__Bacteria; p__Firmicutes; c__Bacilli; o__Lactobacillales; f__Lactobacillaceae; g__Lactobacillus; s__zeae
6d97d13466175e69af9e886f475d6d11	k__Bacteria; p__Proteobacteria; c__Gammaproteobacteria; o__Cardiobacteriales; f__Cardiobacteriaceae; g__Cardiobacterium; s__
6db10504abccefd2189b4dee19e54e1b	k__Bacteria; p__Proteobacteria; c__Alphaproteobacteria; o__Rhodospirillales; f__Rhodospirillaceae; g__Telmatospirillum; s__
6db1c6873919f6d9ad3a13f819c4e542	k__Bacteria; p__Proteobacteria; c__Gammaproteobacteria; o__Pseudomonadales; f__Pseudomonadaceae
6db7133417203110af77fd9dd81a445c	k__Bacteria; p__Actinobacteria; c__Actinobacteria; o__Actinomycetales; f__Microbacteriaceae
6db820962a5bf3ba7e0fe7f3f9dcc994	k__Bacteria; p__Fusobacteria; c__Fusobacteriia; o__Fusobacteriales; f__Fusobacteriaceae; g__Fusobacterium; s__
6dbb8a60230e3116bbb8aeedfe16cd6c	k__Bacteria; p__Actinobacteria; c__Actinobacteria; o__Actinomycetales; f__Corynebacteriaceae; g__Corynebacterium; s__
6dde0f5fbaeb7815abf5a105411c3507	k__Bacteria; p__Actinobacteria; c__Actinobacteria; o__Actinomycetales; f__Dietziaceae; g__Dietzia; s__
6df39bf586bbcd8b59254aecc8491376	k__Bacteria; p__Fusobacteria; c__Fusobacteriia; o__Fusobacteriales; f__Leptotrichiaceae; g__Leptotrichia; s__
6e0d2d907bbe9a89cd0c226980fff5f4	k__Bacteria; p__Firmicutes; c__Clostridia; o__Clostridiales; f__Ruminococcaceae; g__Oscillospira; s__
6e0ee36ee1f02aa82cb6072ea2a8c0f4	k__Bacteria; p__Firmicutes; c__Bacilli; o__Bacillales; f__Paenibacillaceae; g__Paenibacillus; s__barengoltzii
6e17523564240bd9e276020ca87469f6	k__Bacteria; p__Firmicutes; c__Clostridia; o__Clostridiales; f__; g__; s__
6e3e062d65c1b047950a2492118eb70b	k__Bacteria; p__SR1; c__; o__; f__; g__; s__
6e424244f0ae7694d4a2678c19ecc0a9	k__Bacteria; p__Firmicutes; c__Clostridia; o__Clostridiales; f__; g__; s__
6e5be229dd49e819c917d2ae8b72610b	k__Bacteria; p__Firmicutes; c__Clostridia; o__Clostridiales; f__Ruminococcaceae; g__Ruminococcus; s__
6ea8228cb56f8a62f932f0e613bca40e	k__Bacteria; p__Firmicutes; c__Bacilli; o__Bacillales; f__[Thermicanaceae]; g__Thermicanus; s__
6eaa4126f1149270fce6d316338af7f1	k__Bacteria; p__Firmicutes; c__Clostridia; o__Clostridiales; f__; g__; s__
6eb26b2cb4710ea9e8f531f1c6b46ff2	k__Bacteria; p__Proteobacteria; c__Gammaproteobacteria; o__Legionellales; f__Coxiellaceae; g__; s__
6eb32d208cf35e9f9b690e49eaeb3956	k__Bacteria; p__Firmicutes; c__Bacilli; o__Bacillales; f__Paenibacillaceae
6ec0cc5f2f9c6e4b57f0b88e833191de	k__Bacteria; p__Firmicutes; c__Clostridia; o__Clostridiales; f__Ruminococcaceae; g__; s__
6edaba4f0c901e181895b9d2ca38f395	k__Bacteria; p__Fusobacteria; c__Fusobacteriia; o__Fusobacteriales; f__Leptotrichiaceae; g__Leptotrichia; s__
6eeab3fb5a99cca2f0a584047433a90b	k__Bacteria; p__Actinobacteria; c__Actinobacteria; o__Actinomycetales; f__Microbacteriaceae; g__Leucobacter; s__
6eed1def0ab790ba31d824c770114655	k__Bacteria; p__Firmicutes; c__Bacilli; o__Bacillales; f__Paenibacillaceae; g__; s__
6ef30ad70950c7994898405da4aa1f2a	k__Bacteria; p__Actinobacteria; c__Actinobacteria; o__Actinomycetales; f__Nocardioidaceae; g__Aeromicrobium; s__
6f29d22c4b7c99c9792da092a9b98631	k__Bacteria; p__Firmicutes; c__Clostridia; o__Clostridiales; f__Lachnospiraceae; g__Blautia; s__
6f2b8b5662ca322965a1babe7d54baab	k__Bacteria; p__Firmicutes; c__Bacilli; o__Bacillales; f__Planococcaceae; g__Ureibacillus; s__
6f3a6cf0c5dbb6d98185f4745d851faf	k__Bacteria; p__Bacteroidetes; c__Bacteroidia; o__Bacteroidales; f__Porphyromonadaceae; g__Porphyromonas; s__endodontalis
6fd8493842adee2b193865fb0ffbec46	k__Bacteria; p__Firmicutes; c__Clostridia; o__Clostridiales; f__; g__; s__
6fd98b2fffdc44ad8835031a7458591d	k__Bacteria; p__Proteobacteria; c__Gammaproteobacteria; o__Pseudomonadales; f__Pseudomonadaceae; g__Pseudomonas; s__veronii
700188993370f8fdcc33b62b18f03df4	k__Bacteria; p__Firmicutes; c__Clostridia; o__Clostridiales; f__Lachnospiraceae; g__; s__
70034caaecccd57543075fb0f0cb6e62	k__Bacteria; p__Firmicutes; c__Bacilli; o__Bacillales; f__Paenibacillaceae; g__Paenibacillus
7021d8d56277291858378fecfa7a131c	k__Bacteria; p__Firmicutes; c__Bacilli; o__Bacillales; f__Paenibacillaceae; g__Paenibacillus; s__
702af9e944edfd5a1a7f0dce0d566376	k__Bacteria; p__Actinobacteria; c__Actinobacteria; o__Actinomycetales; f__Microbacteriaceae; g__Salinibacterium; s__
702e821793e8ad73e60a49ee91165118	k__Bacteria; p__Firmicutes; c__Bacilli; o__Bacillales; f__Thermoactinomycetaceae; g__Thermoactinomyces; s__
706a463876c3dc515cd29492c0be4e47	k__Bacteria; p__Actinobacteria; c__Actinobacteria; o__Actinomycetales; f__Pseudonocardiaceae; g__Saccharopolyspora; s__hirsuta
7073094813c226981a671b036f4fdbcc	k__Bacteria; p__Firmicutes; c__Clostridia; o__Clostridiales; f__Lachnospiraceae
707740d13076516032127f753473cfc3	k__Bacteria; p__Firmicutes; c__Clostridia; o__Clostridiales; f__; g__; s__
70792b6ac0d2c723cec8c12dc6576345	k__Bacteria; p__Firmicutes; c__Clostridia; o__Clostridiales; f__; g__; s__
70a60612f186462ac3e8cd7ffb50690c	k__Bacteria; p__Proteobacteria; c__Alphaproteobacteria; o__Rhodobacterales; f__Rhodobacteraceae; g__Paracoccus; s__marcusii
70aea17a31b91abab9ea756c5b56792c	k__Bacteria; p__Proteobacteria; c__Alphaproteobacteria; o__Rickettsiales; f__mitochondria
70d9b060e6c0b37c28dd6b1b6073baaa	k__Bacteria; p__Firmicutes; c__Clostridia; o__Clostridiales
70dbac76545ca7f0d29e40f47caf5706	k__Bacteria; p__Bacteroidetes; c__Bacteroidia; o__Bacteroidales; f__[Paraprevotellaceae]; g__[Prevotella]; s__tannerae
70fc3617203156244b89c6c487dcb312	k__Bacteria; p__Actinobacteria; c__Actinobacteria; o__Actinomycetales; f__Corynebacteriaceae; g__Corynebacterium; s__
7102a8c536fc4dbb71e86a24fcf79571	k__Bacteria; p__Firmicutes; c__Bacilli; o__Bacillales; f__Alicyclobacillaceae; g__Alicyclobacillus; s__
7105acaea95d8aaa612633cfd1b83ac5	k__Bacteria; p__Firmicutes; c__Clostridia; o__Clostridiales; f__[Mogibacteriaceae]; g__Anaerovorax; s__
712f1b43479b1a053efa6276386c419d	k__Bacteria; p__Fusobacteria; c__Fusobacteriia; o__Fusobacteriales; f__Fusobacteriaceae; g__Fusobacterium; s__
712f610d95151fd7db44bd3a13e3ad15	k__Bacteria; p__Bacteroidetes; c__Bacteroidia; o__Bacteroidales; f__Prevotellaceae; g__Prevotella; s__melaninogenica
71327615cd4f3268cdbade3dc8e0bb49	k__Bacteria; p__Actinobacteria; c__Actinobacteria; o__Actinomycetales; f__Nocardioidaceae; g__Actinopolymorpha; s__
71388bf0952df19a8fad5f1bfa9d8c43	k__Bacteria; p__Firmicutes; c__Clostridia; o__Clostridiales; f__; g__; s__
715a5706f5ea5356f6c4772dc98d6430	k__Bacteria; p__Firmicutes; c__Erysipelotrichi; o__Erysipelotrichales; f__Erysipelotrichaceae; g__; s__
715ccce623a963888d484f969b745fb4	k__Bacteria; p__Firmicutes; c__Clostridia; o__Clostridiales; f__[Tissierellaceae]; g__Anaerococcus; s__
716ea12175e35aef655992beb8cdad23	k__Bacteria; p__Firmicutes; c__Clostridia; o__Clostridiales; f__Lachnospiraceae; g__Oribacterium; s__
717a5cdac5e5ddc4bf9a770b6d51436a	k__Bacteria; p__Firmicutes; c__Clostridia; o__Clostridiales; f__[Mogibacteriaceae]; g__Mogibacterium; s__
71ad86732cca2ae0b341059f618dd535	k__Bacteria; p__Proteobacteria; c__Alphaproteobacteria; o__Rhizobiales; f__Hyphomicrobiaceae; g__Hyphomicrobium; s__
71b2251e3dc1201dbaece354c40c930d	k__Bacteria; p__Firmicutes; c__Clostridia; o__Clostridiales; f__; g__; s__
71bc37beeb312c3f25cbca72c21cfdd8	k__Bacteria; p__Firmicutes; c__Clostridia; o__Clostridiales; f__Lachnospiraceae; g__Catonella; s__
71cf749e7451fc8c43c57bf6c159e2c9	k__Bacteria; p__Proteobacteria; c__Gammaproteobacteria; o__Pasteurellales; f__Pasteurellaceae
71d3b19d02b4eec9e09535ccfa6df400	k__Bacteria; p__Bacteroidetes; c__Bacteroidia; o__Bacteroidales; f__Prevotellaceae; g__Prevotella; s__
71d80586e173487a6070b38eb3b96131	k__Bacteria; p__Firmicutes; c__Clostridia; o__Clostridiales; f__Veillonellaceae; g__Propionispora; s__
71fb2855a4d81b3edab06cff6cc2f5c6	k__Bacteria; p__Chlamydiae; c__Chlamydiia; o__Chlamydiales; f__Parachlamydiaceae; g__Candidatus Protochlamydia; s__
71fd508a23e90778a8cb92c931a50720	k__Bacteria; p__Firmicutes; c__Clostridia; o__OPB54; f__; g__; s__
7215e6796de3e835c8879da79b1b708d	k__Bacteria; p__Firmicutes; c__Clostridia; o__Clostridiales; f__Ruminococcaceae; g__; s__
721bbde09abf2f51fc7d8caeab5b22f1	k__Bacteria; p__Firmicutes; c__Clostridia; o__Clostridiales; f__Clostridiaceae
721c76484bc6681c462c0d67cf130a3b	k__Bacteria; p__Firmicutes; c__Clostridia; o__Clostridiales; f__Lachnospiraceae; g__Roseburia; s__faecis
72237de31bf28fe12a4f3fb4e12efe5b	k__Bacteria; p__Firmicutes; c__Clostridia; o__Clostridiales; f__Lachnospiraceae
722daef161b68c05604fc6e9614b3cb2	k__Bacteria; p__Firmicutes; c__Clostridia; o__Clostridiales
7241d82c7f7950ac4f215518b05026ae	k__Bacteria; p__Proteobacteria; c__Betaproteobacteria; o__Neisseriales; f__Neisseriaceae; g__Neisseria; s__subflava
72432319924bed4a369f1ced5aaf4d0f	k__Bacteria; p__Firmicutes; c__Clostridia; o__Clostridiales; f__Lachnospiraceae; g__Clostridium; s__colinum
725f3336cd7e92e814c5f299fc4bfddb	k__Bacteria; p__Firmicutes; c__Clostridia; o__Clostridiales; f__; g__; s__
7278b23e468176c29cda6657e871b227	k__Bacteria; p__Actinobacteria; c__Actinobacteria; o__Actinomycetales; f__Actinomycetaceae; g__Actinomyces; s__
727ead2e05a7e5fd0b99a5fee8ffdc01	k__Bacteria; p__Firmicutes; c__Bacilli; o__Bacillales; f__Paenibacillaceae; g__Paenibacillus; s__
72a2fdbdfde031caa4bf16fe89c052c9	k__Bacteria; p__Actinobacteria; c__Actinobacteria; o__Actinomycetales; f__Microbacteriaceae
72b4455586688d0863143a3e0bb71316	k__Bacteria; p__Firmicutes; c__Bacilli; o__Lactobacillales; f__Carnobacteriaceae; g__Trichococcus; s__
72be788634a62753efc26dabc6c03060	k__Bacteria; p__Firmicutes; c__Clostridia; o__Clostridiales; f__Veillonellaceae; g__Sporomusa; s__
72c2a12d6911c2614b0bfffeac85df93	k__Bacteria
72e530a4206f2e4804d502f4dfca8387	k__Bacteria; p__Bacteroidetes; c__Bacteroidia; o__Bacteroidales; f__S24-7; g__; s__
72f4673b00333775ba504b1589030040	k__Bacteria; p__Proteobacteria; c__Gammaproteobacteria; o__Legionellales; f__Legionellaceae; g__; s__
72f927581d74feb69ac0767d85b812af	k__Bacteria; p__Actinobacteria; c__Actinobacteria; o__Actinomycetales; f__Micromonosporaceae; g__Pilimelia; s__
730a364f420288a95b9d6feb7ea3674c	k__Bacteria; p__[Thermi]; c__Deinococci; o__Deinococcales; f__Trueperaceae; g__Truepera; s__
73275cac0268989e1aaf3a6ad959b1f2	k__Bacteria; p__Proteobacteria; c__Alphaproteobacteria; o__Sphingomonadales; f__Sphingomonadaceae; g__Sphingomonas; s__
732bbe1c4f4694c0193ead8e4057a31f	k__Bacteria; p__Proteobacteria; c__Alphaproteobacteria; o__Sphingomonadales; f__Sphingomonadaceae; g__Sphingomonas; s__
732facdf060bbb5e5ec7dd0b49b45166	k__Bacteria; p__Firmicutes; c__Bacilli; o__Bacillales; f__Paenibacillaceae; g__Ammoniphilus; s__
73329e349d1df1dad119db302b5a0335	k__Bacteria; p__Firmicutes; c__Clostridia; o__Clostridiales; f__[Tissierellaceae]; g__Finegoldia; s__
7358e8ecd53d3712b0d7c9b04da4a77a	k__Bacteria; p__Proteobacteria; c__Gammaproteobacteria; o__Pseudomonadales; f__Pseudomonadaceae; g__Pseudomonas; s__
7367efd6810878220f7c21fbf468ddf8	k__Bacteria; p__Firmicutes; c__Clostridia; o__Clostridiales; f__Peptostreptococcaceae; g__Peptostreptococcus; s__
736b3013b6813f54dd1fe6f56a9d0811	k__Bacteria; p__Firmicutes; c__Clostridia; o__Clostridiales; f__Ruminococcaceae
7376eb30d4a59d2e35c4a558fa824a08	k__Bacteria; p__Firmicutes; c__Clostridia; o__Clostridiales; f__Ruminococcaceae; g__Oscillospira; s__
7381822ba9e86f4a3c58a0bdf9db587d	k__Bacteria; p__Bacteroidetes; c__Bacteroidia; o__Bacteroidales; f__Bacteroidaceae; g__Bacteroides; s__
7383eea75ab583ca645c6a53b091a9b0	k__Bacteria; p__Bacteroidetes; c__Flavobacteriia; o__Flavobacteriales; f__Flavobacteriaceae; g__Capnocytophaga; s__
738787780197a9b57603e6d2bb88b864	k__Bacteria; p__Firmicutes; c__Clostridia; o__Clostridiales; f__Veillonellaceae; g__; s__
73941b5ceaec32351a7c4b2f5d158b5d	k__Bacteria; p__Firmicutes; c__Bacilli; o__Bacillales; f__; g__; s__
7396a40753488c53d367a1682ccca0a3	k__Bacteria; p__Actinobacteria; c__Actinobacteria; o__Actinomycetales; f__Microbacteriaceae; g__Frigoribacterium; s__
7398a8fcbc69240bfbb4d43d2d0a89c8	k__Bacteria; p__Firmicutes; c__Clostridia; o__Clostridiales; f__; g__; s__
73b97fff84e6b4cc67db377eba357699	k__Bacteria; p__Bacteroidetes; c__Sphingobacteriia; o__Sphingobacteriales; f__; g__; s__
73cd1c10175eb846badd2f34bd86dd08	k__Bacteria; p__Firmicutes; c__Clostridia; o__Clostridiales; f__Ruminococcaceae; g__Oscillospira; s__
73d8266b6f92ab64555c03a0abd0714f	k__Bacteria; p__Proteobacteria; c__Alphaproteobacteria; o__Sphingomonadales; f__Sphingomonadaceae; g__Sphingobium; s__
73dd04df736298829b2f3ccdca687251	k__Bacteria; p__Actinobacteria; c__Actinobacteria; o__Actinomycetales; f__Corynebacteriaceae; g__Corynebacterium; s__
73e4d93dd9fbdebac0e8cc18ecf0250f	k__Bacteria; p__Tenericutes; c__Mollicutes; o__RF39; f__; g__; s__
74054d8a8abeecd40b0154b1fa913208	k__Bacteria; p__Proteobacteria; c__Deltaproteobacteria; o__MIZ46; f__; g__; s__
742d840c11e5ec4cd5964cd7dc1f4300	k__Bacteria; p__Proteobacteria; c__Betaproteobacteria; o__Burkholderiales; f__Comamonadaceae; g__Tepidimonas; s__
742e1f191223f58590661de80b9d6e3b	k__Bacteria; p__Bacteroidetes; c__Bacteroidia; o__Bacteroidales; f__Rikenellaceae; g__Alistipes; s__onderdonkii
743402a14cce3cb04c003398cdb80534	k__Bacteria; p__Actinobacteria; c__Actinobacteria; o__Actinomycetales; f__Corynebacteriaceae; g__Corynebacterium; s__
743f7ae3696465bde6fc6ed4b00091af	k__Bacteria; p__Firmicutes; c__Clostridia; o__Clostridiales; f__Lachnospiraceae; g__; s__
746d3f3da0e433b6676699d6e7d07009	k__Bacteria; p__Bacteroidetes; c__Bacteroidia; o__Bacteroidales; f__[Paraprevotellaceae]; g__[Prevotella]; s__
747698871698b15668f6c4a9b14bcbb3	k__Bacteria; p__Firmicutes; c__Clostridia; o__Clostridiales; f__Ruminococcaceae; g__Ruminococcus; s__
747f5947c9bf8b56e76e524e5506ce8c	k__Bacteria; p__Acidobacteria; c__Acidobacteriia; o__Acidobacteriales; f__Acidobacteriaceae; g__; s__
748dfcb79683c7af722f556e6feb0cc4	k__Bacteria; p__Firmicutes; c__Clostridia; o__Clostridiales; f__Lachnospiraceae; g__Moryella; s__
74aa5484712c79799a2a4e216518f17a	k__Bacteria; p__Actinobacteria; c__Actinobacteria; o__Actinomycetales; f__Corynebacteriaceae; g__Corynebacterium; s__
74aaeb93ba19830fa0e2cc55966371bd	k__Bacteria; p__Firmicutes; c__Clostridia; o__SHA-98; f__; g__; s__
74aec3d6cd140a5de868ae2926562f17	k__Bacteria; p__Firmicutes; c__Clostridia; o__Clostridiales; f__[Mogibacteriaceae]; g__Anaerovorax; s__
74b55e6f2880c4ea4269a042f62f11d3	k__Bacteria; p__Firmicutes; c__Clostridia; o__Clostridiales; f__Lachnospiraceae
74ce96f7f0a821f68281b4f8513b9651	k__Bacteria; p__Firmicutes; c__Clostridia; o__Clostridiales; f__Veillonellaceae; g__Sporomusa; s__
74d8a7bba0aa73837ecddfbb8c7dbbb8	k__Bacteria; p__Firmicutes; c__Clostridia; o__Clostridiales; f__; g__; s__
74e9ccab635cf7c8e57669b9e13d8449	k__Bacteria; p__Proteobacteria; c__Gammaproteobacteria; o__Pasteurellales; f__Pasteurellaceae; g__Haemophilus; s__influenzae
74ef413ac10a27d7f2a10cc74c3bc6d7	k__Bacteria; p__Actinobacteria; c__Acidimicrobiia; o__Acidimicrobiales; f__Microthrixaceae; g__; s__
75048fefa25d65b81f02042124649564	k__Bacteria; p__Firmicutes; c__Clostridia; o__Clostridiales; f__Ruminococcaceae; g__Oscillospira; s__
75169a5ea0770beacf803383aaa3f305	k__Bacteria; p__Tenericutes; c__Mollicutes; o__RF39; f__; g__; s__
7521edd61e578d0d49cfd01fbf8cc2f5	k__Bacteria; p__Proteobacteria; c__Gammaproteobacteria; o__Xanthomonadales; f__Xanthomonadaceae; g__Xanthomonas; s__
7525edaf132605f4ebcdacb6144864ea	k__Bacteria; p__Actinobacteria; c__Coriobacteriia; o__Coriobacteriales; f__Coriobacteriaceae; g__Collinsella; s__aerofaciens
7566bcf9eeeac8d93022dfa6b5e75ab5	k__Bacteria; p__Firmicutes; c__Clostridia; o__Clostridiales; f__Lachnospiraceae
75707ea6e30a31c3d2ae5a06b35d96c4	k__Bacteria; p__Tenericutes; c__Mollicutes; o__RF39; f__; g__; s__
75becb2d36234aba744a63a5352d7bcf	k__Bacteria; p__Firmicutes; c__Clostridia; o__Clostridiales
75c14994b8a71e4a6fdb6268c9796e4a	k__Bacteria; p__Firmicutes; c__Clostridia; o__Clostridiales; f__[Mogibacteriaceae]; g__; s__
75d0bafe93e5796cb5924fb44c9b3cf4	k__Bacteria; p__Actinobacteria; c__Actinobacteria; o__Actinomycetales; f__Dietziaceae; g__Dietzia; s__
75d7a992250e5139b1d11bd6ea79fae2	k__Bacteria; p__Firmicutes; c__Clostridia; o__Clostridiales; f__Veillonellaceae; g__; s__
75d7d892dbefe6e675689356fc657648	k__Bacteria; p__Firmicutes; c__Bacilli; o__Gemellales; f__Gemellaceae; g__Gemella; s__
75e04e04e66a5ae5d42baff42ea34b0c	k__Bacteria; p__Firmicutes; c__Clostridia; o__Clostridiales; f__Lachnospiraceae; g__; s__
760008d3c6c00a6ab59441c22184794a	k__Bacteria; p__Proteobacteria; c__Alphaproteobacteria; o__Rhodospirillales; f__Acetobacteraceae; g__; s__
760a43d6f26a75c589bc1b5752d07ff3	k__Bacteria; p__Actinobacteria; c__Actinobacteria; o__Actinomycetales; f__Actinomycetaceae; g__Actinomyces; s__
760a981be927a34f2a641c658be3ccdb	k__Bacteria; p__Bacteroidetes; c__Bacteroidia; o__Bacteroidales; f__Prevotellaceae; g__Prevotella; s__pallens
763bd61b9a90e35cb2a0201b454be315	k__Bacteria; p__Firmicutes; c__Clostridia; o__Clostridiales; f__Lachnospiraceae
764f3d72f55334ef626ea58f6e0d5107	k__Bacteria; p__Proteobacteria; c__Alphaproteobacteria; o__Rhizobiales; f__Rhizobiaceae; g__Agrobacterium; s__
766e8e5807e77bbeddb4cabb8ad277e3	k__Bacteria; p__Bacteroidetes; c__Bacteroidia; o__Bacteroidales; f__Prevotellaceae; g__Prevotella; s__pallens
766ff79e912a1658b715e6edf1569391	k__Bacteria; p__Firmicutes; c__Clostridia; o__Clostridiales; f__Ruminococcaceae; g__Sporobacter; s__termitidis
76a2a89fb35336e7b117fc44ff915092	k__Bacteria; p__Firmicutes; c__Clostridia; o__Clostridiales; f__Veillonellaceae; g__Veillonella; s__parvula
76a9a93f8073968c6221ffa3088bde6f	k__Bacteria; p__Firmicutes; c__Clostridia; o__Clostridiales; f__Lachnospiraceae; g__Lachnoanaerobaculum; s__orale
76b39e86c95e0c7dd8b9c57b974f6532	k__Bacteria; p__Bacteroidetes; c__Bacteroidia; o__Bacteroidales; f__Bacteroidaceae; g__Bacteroides; s__ovatus
76b7130f1162a090d1f340b4a29e632b	k__Bacteria; p__Actinobacteria; c__Actinobacteria; o__Actinomycetales; f__Streptosporangiaceae; g__; s__
76b771d44b5170495ec29e3f4d88cbf8	k__Bacteria; p__Firmicutes; c__Clostridia; o__Clostridiales; f__Clostridiaceae; g__; s__
76c79f2abc57cc084ad58546922178ea	k__Bacteria; p__Bacteroidetes; c__Bacteroidia; o__Bacteroidales; f__Porphyromonadaceae; g__Porphyromonas; s__
76d253234004102b7c2b2e00b2245d87	k__Bacteria; p__Firmicutes; c__Clostridia; o__Clostridiales; f__; g__; s__
76edd2b8ec9cd2f0873e0e4f4defb24b	k__Bacteria; p__Verrucomicrobia; c__Verrucomicrobiae; o__Verrucomicrobiales; f__Verrucomicrobiaceae; g__; s__
76f3151d9be7ba17a96c595019ef017e	k__Bacteria; p__Proteobacteria; c__Betaproteobacteria; o__Neisseriales; f__Neisseriaceae; g__; s__
7730b6bae5e6306458a5d5e78f1d9355	k__Bacteria; p__Proteobacteria; c__Gammaproteobacteria; o__Pseudomonadales; f__Moraxellaceae; g__Psychrobacter; s__pulmonis
77402c8b7d91a8c3f96067d4c4f7987c	k__Bacteria; p__Firmicutes; c__Clostridia; o__Clostridiales; f__; g__; s__
777e1538f66733c119aafe98ce18b176	k__Bacteria; p__Bacteroidetes; c__Bacteroidia; o__Bacteroidales; f__S24-7; g__; s__
779e0d9d9b65df73a8ddb5988fe85c51	k__Bacteria; p__Firmicutes; c__Clostridia; o__Clostridiales; f__; g__; s__
77a920bd965da12d31f93c1adf2c5ea1	k__Bacteria; p__Actinobacteria; c__Actinobacteria; o__Actinomycetales; f__Corynebacteriaceae; g__Corynebacterium; s__
77c2dc197e6b3dbebc4ee240c6a1c559	k__Bacteria; p__Firmicutes; c__Clostridia; o__Clostridiales; f__Ruminococcaceae; g__Oscillospira; s__
77cd4ee4fdec6524aaf1227507649a90	k__Bacteria; p__Firmicutes; c__Bacilli; o__Lactobacillales; f__Lactobacillaceae; g__Lactobacillus; s__iners
77d2193750dd3b377225170fda9998fa	k__Bacteria; p__Actinobacteria; c__Actinobacteria; o__Actinomycetales; f__Corynebacteriaceae; g__Corynebacterium; s__
77d94f31138067f7d9e3563420713fc6	k__Bacteria; p__Tenericutes; c__Mollicutes; o__RF39; f__; g__; s__
77da1d31adb235bcbb1ce6f1016bd1a7	k__Bacteria; p__Chloroflexi; c__Thermomicrobia; o__JG30-KF-CM45; f__; g__; s__
77f352b310dc941a969edf6536c2e820	k__Bacteria; p__Firmicutes; c__Clostridia; o__Clostridiales; f__[Mogibacteriaceae]; g__; s__
7807a7c66b7e44dcda14bb67b2e6a4b4	k__Bacteria; p__Firmicutes; c__Clostridia; o__Clostridiales; f__Ruminococcaceae; g__Oscillospira; s__
780b51fb5bcdc52e5627c4b3fb5d838b	k__Bacteria; p__Firmicutes; c__Clostridia; o__Clostridiales; f__Veillonellaceae; g__Sporomusa; s__
780e2f9cb3c54f0209c18115138b7580	k__Bacteria; p__Firmicutes; c__Clostridia; o__Clostridiales; f__Ruminococcaceae; g__Ethanoligenens; s__
780eb22c4d397488dbde11c282eae0e7	k__Bacteria; p__Firmicutes; c__Erysipelotrichi; o__Erysipelotrichales; f__Erysipelotrichaceae; g__; s__
7814c2b485cc601b885f117c70bbdf5d	k__Bacteria; p__Firmicutes; c__Clostridia; o__Clostridiales; f__Ruminococcaceae; g__Ruminococcus; s__callidus
782ec1c837ab7178fc41aa16468d521f	k__Bacteria; p__Firmicutes; c__Clostridia; o__Clostridiales; f__Ruminococcaceae; g__Ruminococcus; s__
78594707b492026930a28a28706ab19a	k__Bacteria; p__Firmicutes; c__Clostridia; o__Clostridiales; f__[Mogibacteriaceae]; g__Mogibacterium; s__
785d67b0c0232c96a21b7bf1c46f0a79	k__Bacteria; p__Bacteroidetes; c__Bacteroidia; o__Bacteroidales; f__Prevotellaceae; g__Prevotella; s__melaninogenica
7860b53ae9f082508eeb17d0e969de04	k__Bacteria; p__Firmicutes; c__Bacilli; o__Bacillales; f__Paenibacillaceae; g__; s__
786d129c4afb72c44da22df340c69165	k__Bacteria; p__Firmicutes; c__Clostridia; o__Clostridiales; f__Lachnospiraceae; g__Oribacterium; s__
7876a5906e5be58d068237cd0b6ebb3c	k__Bacteria; p__Proteobacteria; c__Gammaproteobacteria; o__Xanthomonadales; f__Sinobacteraceae; g__; s__
787c5d7a23ff7a1fce4e4fc04c3f5a7c	k__Bacteria; p__Firmicutes; c__Clostridia; o__Clostridiales; f__Lachnospiraceae; g__Dorea; s__
7882074f5130e63e7a670a319cdf2987	k__Bacteria; p__Firmicutes; c__Clostridia; o__Clostridiales; f__Veillonellaceae; g__Sporomusa; s__
78893ea75c78a8de12780496596634b6	k__Bacteria; p__Firmicutes; c__Clostridia; o__Clostridiales; f__Lachnospiraceae; g__; s__
788b754a78688aa8661deb99228b5e59	k__Bacteria; p__Firmicutes; c__Clostridia; o__Clostridiales; f__; g__; s__
78900f277c6e468bc41f90e30b84fa3d	k__Bacteria; p__Firmicutes; c__Clostridia; o__Clostridiales; f__Lachnospiraceae
789622bf56fea28a1ca74dff348c8d48	k__Bacteria; p__Firmicutes; c__Clostridia; o__Clostridiales; f__Ruminococcaceae; g__; s__
78971c3a8ff9b481ea0ad8e8703078fd	k__Bacteria; p__Firmicutes; c__Clostridia; o__Clostridiales; f__Lachnospiraceae; g__Epulopiscium; s__
789cb3ee0a83d15f1b191151293158e8	k__Bacteria; p__Proteobacteria; c__Betaproteobacteria; o__Neisseriales; f__Neisseriaceae; g__Kingella; s__
78b8647c84cfc8e1b7b2578872e42fae	k__Bacteria; p__Firmicutes; c__Clostridia; o__Clostridiales; f__Ruminococcaceae; g__Oscillospira; s__
78bde97a6e8f259342747f2d608611b2	k__Bacteria; p__Firmicutes; c__Clostridia; o__Clostridiales; f__Christensenellaceae; g__; s__
78d2353d11fe9e4a8a5976115cf6ae57	k__Bacteria; p__Proteobacteria; c__Deltaproteobacteria; o__Myxococcales; f__Myxococcaceae; g__Corallococcus; s__exiguus
78e485ed362e52c2dd1ea76bad6f001c	k__Bacteria; p__Firmicutes; c__Clostridia; o__Clostridiales; f__Veillonellaceae; g__Dialister; s__
78ee5404fb8a7e03bce5727c2a686683	k__Bacteria; p__Firmicutes; c__Clostridia; o__Clostridiales; f__Eubacteriaceae; g__; s__
790762f0fc364739cd124897e05707f3	k__Bacteria; p__Firmicutes; c__Clostridia; o__Clostridiales; f__Clostridiaceae; g__; s__
7911816f5e81f650f769aba0d5c708cb	k__Bacteria; p__Cyanobacteria; c__Chloroplast; o__Streptophyta; f__; g__; s__
7913e3df074e5380cc7901d03988101f	k__Bacteria; p__Firmicutes; c__Clostridia; o__Clostridiales; f__Ruminococcaceae; g__Gemmiger; s__formicilis
791a380f8a3dbcd2528854ba5ddbbacc	k__Bacteria; p__Bacteroidetes; c__; o__; f__; g__; s__
7928d1515110e7c3121160a57f724ab1	k__Bacteria; p__Firmicutes; c__Erysipelotrichi; o__Erysipelotrichales; f__Erysipelotrichaceae; g__; s__
793b4581cb47812b18fae13da6d15966	k__Bacteria; p__Proteobacteria; c__Gammaproteobacteria; o__Pasteurellales; f__Pasteurellaceae; g__Haemophilus; s__parainfluenzae
79433437d382c99901762522176f5d4f	k__Bacteria; p__Firmicutes; c__Clostridia; o__Clostridiales; f__Lachnospiraceae; g__Lachnoanaerobaculum; s__orale
794c48d1c110499dbd6338457f2ed417	k__Bacteria; p__Firmicutes; c__Clostridia; o__Clostridiales; f__Lachnospiraceae; g__Clostridium; s__citroniae
79584eae08e9961ab4fd7beedfbed696	k__Bacteria; p__Proteobacteria; c__Betaproteobacteria; o__Neisseriales; f__Neisseriaceae; g__; s__
7963654625b74816cd1eb1373a31352b	k__Bacteria; p__Firmicutes; c__Clostridia; o__Clostridiales; f__Ruminococcaceae; g__; s__
7986ebef50cc6268d450a21b9157d4c3	k__Bacteria; p__Firmicutes; c__Clostridia; o__Clostridiales; f__Lachnospiraceae
799a8c6855cd4876b5bb4d3a1418b465	k__Bacteria; p__Firmicutes; c__Clostridia; o__Clostridiales; f__Lachnospiraceae
799c0b9e292a00216e983d572d6e63a2	k__Bacteria; p__Firmicutes; c__Clostridia; o__Clostridiales; f__; g__; s__
79cb741f4d6ed2b61a77ddd9845be198	k__Bacteria; p__Firmicutes; c__Clostridia; o__Clostridiales; f__Lachnospiraceae; g__; s__
79cd9087bcbeb4c4209f5463e43e6eee	k__Bacteria; p__Firmicutes; c__Clostridia; o__Clostridiales
79ce293e08740501dc66fdf3d3709da2	k__Bacteria; p__Proteobacteria; c__Alphaproteobacteria; o__Rhizobiales; f__Hyphomicrobiaceae; g__Devosia; s__
[truncated: 2,134 more rows]
